# Supplementary material for: Genome-Wide Signatures of Selection Reveal Genes Associated With Performance in American Quarter Horse Subpopulations
Source: Front Genet. 2018 Jul 19;9:249. doi: 10.3389/fgene.2018.00249 (PMC6060370; doi:10.3389/fgene.2018.00249)
Supplement: Supplementary Table 1 — List of seed genes obtained using the PolySearch 2.0 algorithm based on skeletal muscle development, central nervous system development and metabolism. [file Table_1.XLSX]

## Sheet: Sheet1
Supplementary Table 1. List of seed genes obtained using the PolySearch 2.0 algorithm based on skeletal muscle development, central nervous system development and metabolism.
Skeletal Muscle	Central Nervous System	Metabolism
ACTA1	BDNF	APOA2
ACTB	CD71	APOA5
COX7A1	CXCL12	APOE
GYS1	CYP2D6	BDNF
MICAL1	GAL	GHRL
MICAL2	GRIN1	INSR
MSTN	GRM1	NLRP3
MYH1	KIF5C	PLAGL1
RYR1	LTB	PPARA
SEPN1	NPY	TF
SLC2A4	TNFSF4	ZFHX3
