# Supplementary material for: Genome-Wide Signatures of Selection Reveal Genes Associated With Performance in American Quarter Horse Subpopulations
Source: Front Genet. 2018 Jul 19;9:249. doi: 10.3389/fgene.2018.00249 (PMC6060370; doi:10.3389/fgene.2018.00249)
Supplement: Supplementary Table 3 — Significant hapQTL windows in all 6 QH subpopulations. [file Table_3.XLSX]

## Sheet: A. Cutting-hapQTL
Supplementary Table 3A. Significant ROI identified by hapQTL in the Cutting QH subpopulation.
Chromosome Number	SNP position (bp)	Bayes Factor value
1	8.13684e+06	5.41707
1	10333658	5.32924
1	1.19364e+07	5.72774
1	1.22567e+07	5.56002
1	18536775	5.39873
1	1.98559e+07	5.62366
1	20314694	6.54525
1	2.03254e+07	6.42878
1	2.05544e+07	8.03996
1	20697525	5.27391
1	2.08653e+07	7.65376
1	2.0884e+07	7.36746
1	2.0896e+07	14.1093
1	2.18942e+07	5.35688
1	2.51849e+07	5.16614
1	30466352	5.94238
1	3.08549e+07	6.36602
1	3.1094e+07	6.63876
1	3.11736e+07	5.05617
1	3.15657e+07	6.2484
1	3.83434e+07	5.10792
1	4.05543e+07	5.40487
1	40595033	5.45295
1	4.56741e+07	5.60684
1	4.7263e+07	6.34037
1	4.96034e+07	8.31863
1	49676309	8.72322
1	5.15031e+07	5.10777
1	5.16947e+07	5.16608
1	51716506	5.49621
1	5.17459e+07	6.67145
1	5.17645e+07	7.71611
1	6.61456e+07	5.07433
1	7.97878e+07	5.43941
1	7.99031e+07	5.04006
1	8.49566e+07	6.5725
1	9.05556e+07	7.36808
1	9.08365e+07	6.34198
1	1.08643e+08	6.5946
1	1.10166e+08	5.85919
1	119044787	5.54434
1	122788265	8.19842
1	126564427	5.85386
1	1.26764e+08	6.18244
1	127066521	9.03194
1	1.27635e+08	5.2429
1	1.27716e+08	5.57042
1	127795681	5.49253
1	1.27887e+08	6.47606
1	127895320	5.39332
1	1.28301e+08	5.9159
1	1.28683e+08	5.6877
1	128713685	8.03745
1	128734146	7.38788
1	1.28754e+08	5.84789
1	128823968	6.2218
1	1.29193e+08	5.09957
1	1.30866e+08	5.2718
1	1.31085e+08	5.2977
1	1.31186e+08	5.2927
1	1.31199e+08	6.41247
1	1.31545e+08	10.3703
1	1.31555e+08	8.67425
1	1.32346e+08	6.55114
1	132356470	7.93328
1	1.32506e+08	7.29626
1	1.32657e+08	7.0728
1	132677055	6.27428
1	1.32696e+08	6.47638
1	1.32797e+08	5.46783
1	132886218	5.44009
1	1.32912e+08	7.1763
1	1.32928e+08	5.09121
1	1.32933e+08	5.22894
1	1.33243e+08	7.49346
1	1.33287e+08	5.60124
1	1.33446e+08	6.37627
1	1.33504e+08	5.13658
1	1.33914e+08	5.1084
1	1.34773e+08	5.74841
1	1.34954e+08	5.91354
1	1.35275e+08	5.79711
1	1.35314e+08	5.80497
1	1.35326e+08	5.12836
1	1.35603e+08	6.05813
1	1.35787e+08	8.30189
1	1.36445e+08	5.13106
1	136655061	5.17744
1	1.38162e+08	5.04871
1	142405089	6.62687
1	1.42456e+08	11.099
1	1.42526e+08	7.48965
1	1.42565e+08	15.0986
1	1.47963e+08	7.55429
1	148264391	5.04766
1	151655016	5.17369
1	1.53005e+08	5.29256
1	1.53047e+08	6.57363
1	1.53085e+08	6.26667
1	1.53673e+08	5.66739
1	1.53834e+08	5.12054
1	1.53854e+08	7.32012
1	1.53913e+08	6.74354
1	1.57465e+08	5.49533
1	1.57595e+08	6.7387
1	1.60394e+08	7.06124
1	1.60506e+08	5.02405
1	1.60656e+08	12.6118
1	1.60661e+08	21.9763
1	1.60725e+08	5.72115
1	1.60732e+08	6.70509
1	1.60827e+08	8.06942
1	1.60855e+08	6.16925
1	1.60925e+08	8.6253
1	1.61296e+08	6.04379
1	1.61707e+08	9.23733
1	1.61716e+08	8.68078
1	161805317	10.2027
1	1.61815e+08	9.88285
1	1.61906e+08	12.2953
1	1.61945e+08	6.05368
1	1.61957e+08	5.84967
1	1.61985e+08	6.88034
1	1.62007e+08	7.6744
1	1.62016e+08	6.76089
1	1.62025e+08	6.64841
1	162045308	6.55692
1	162054791	8.67803
1	1.62195e+08	5.54204
1	1.63345e+08	5.37249
1	1.67824e+08	5.35796
1	1.82155e+08	5.39028
2	1.30648e+06	5.41417
2	2.56463e+06	5.41563
2	2.93508e+06	5.10914
2	4.90712e+06	8.54369
2	4.95397e+06	8.02301
2	6.46815e+06	10.3906
2	6506888	6.51867
2	6.67478e+06	7.5516
2	12914441	5.69139
2	1.34232e+07	6.42898
2	1.34641e+07	12.9684
2	1.34738e+07	7.87664
2	1.35137e+07	5.62739
2	1.39061e+07	10.1231
2	1.39146e+07	7.59555
2	1.45314e+07	6.41188
2	1.8838e+07	7.89718
2	19593759	7.18851
2	1.98155e+07	5.41585
2	2.03256e+07	5.00841
2	2.06931e+07	5.11688
2	20735517	7.43362
2	2.07459e+07	5.85542
2	2.07751e+07	8.11175
2	2.08141e+07	7.90833
2	2.09973e+07	5.46006
2	2.10083e+07	5.05931
2	21054618	7.52497
2	2.10833e+07	12.7237
2	2.11054e+07	8.07633
2	21135896	12.5304
2	2.11458e+07	10.12
2	2.11634e+07	6.86018
2	2.12042e+07	8.70631
2	2.1313e+07	5.31846
2	2.13654e+07	5.57212
2	2.13769e+07	5.55284
2	2.13953e+07	9.36688
2	2.1407e+07	6.80681
2	2.15239e+07	8.76538
2	2.17053e+07	7.92739
2	2.17164e+07	5.10421
2	21744671	6.51527
2	2.20029e+07	7.05407
2	2.20463e+07	5.56924
2	2.21651e+07	7.99564
2	2.21955e+07	8.51418
2	2.26533e+07	5.05631
2	2.27134e+07	6.56452
2	2.27366e+07	5.05641
2	2.27752e+07	7.97337
2	22785867	7.83494
2	2.29042e+07	5.42796
2	2.30755e+07	12.4022
2	2.30936e+07	6.31087
2	2.31064e+07	6.14187
2	2.31846e+07	6.93935
2	2.32641e+07	5.19286
2	2.3496e+07	6.24655
2	2.35562e+07	5.88851
2	2.36029e+07	6.92298
2	2.36446e+07	10.2485
2	2.3685e+07	5.40624
2	2.37267e+07	8.87141
2	2.38757e+07	5.30488
2	2.38878e+07	6.33863
2	2.39554e+07	7.1787
2	2.39646e+07	7.24989
2	2.48535e+07	7.23324
2	2.58346e+07	8.01326
2	2.58651e+07	5.02904
2	2.60951e+07	5.83003
2	2.62653e+07	5.43274
2	26336123	8.27721
2	2.63852e+07	5.27739
2	2.63958e+07	9.43814
2	2.64658e+07	6.50593
2	2.6625e+07	5.66204
2	2.66538e+07	5.11948
2	2.7515e+07	6.79368
2	27524892	5.11616
2	2.7865e+07	5.22056
2	28024011	5.56014
2	2.81123e+07	9.06458
2	2.81834e+07	5.48694
2	2.82769e+07	5.10287
2	28324985	5.24585
2	2.8362e+07	5.28919
2	2.83848e+07	5.12527
2	2.87549e+07	5.33181
2	2.9495e+07	5.10208
2	2.95723e+07	7.01103
2	2.97141e+07	7.21375
2	2.98455e+07	8.89965
2	29897290	5.82034
2	2.99451e+07	5.46209
2	3.01046e+07	5.22696
2	3.01938e+07	7.81569
2	30255198	5.7899
2	3.05074e+07	8.73181
2	3.05262e+07	6.04396
2	30535415	7.66968
2	3.05769e+07	5.12861
2	3.05837e+07	5.54529
2	30626205	5.01072
2	3.06354e+07	5.23492
2	3.0655e+07	7.75384
2	3.06664e+07	9.11716
2	3.06914e+07	5.4413
2	30706187	7.43896
2	3.07262e+07	7.21884
2	30735290	5.23999
2	3.07557e+07	5.56085
2	3.07658e+07	8.22706
2	3.07736e+07	5.79947
2	3.07941e+07	6.56105
2	30813139	6.23252
2	3.08232e+07	5.03774
2	3.08839e+07	10.3795
2	3.09747e+07	9.76185
2	3.10042e+07	7.43207
2	3.1015e+07	14.9495
2	3.10328e+07	5.18354
2	3.10461e+07	5.63419
2	3.10552e+07	7.23331
2	3.10643e+07	14.1909
2	3.10753e+07	17.2845
2	31086531	9.10523
2	32644778	5.77942
2	3.2896e+07	5.1621
2	3.2905e+07	6.06773
2	3.29559e+07	5.71158
2	40714569	5.56724
2	4.07273e+07	5.33037
2	40753669	6.53315
2	4.07635e+07	6.80506
2	40785219	8.01326
2	4.0836e+07	5.9789
2	4.08559e+07	6.94342
2	40873238	9.94104
2	40884101	6.9793
2	4.09114e+07	5.9447
2	4.09254e+07	8.41329
2	4.09456e+07	5.41327
2	40953714	6.92498
2	40967816	5.02764
2	4.10649e+07	5.60594
2	4.1084e+07	6.93798
2	41105334	11.4476
2	41136572	5.22047
2	4.12442e+07	5.16162
2	4.14928e+07	5.10033
2	4.15862e+07	5.19086
2	4.16843e+07	5.73675
2	4.17757e+07	6.3223
2	4.18751e+07	13.3878
2	4.18943e+07	6.075
2	4.19254e+07	7.95248
2	4.20432e+07	6.84819
2	4.20839e+07	7.67649
2	42325282	5.34737
2	4.24167e+07	5.43544
2	4.25044e+07	8.26103
2	4.25252e+07	7.41622
2	4.26363e+07	5.87579
2	4.26445e+07	5.94674
2	4.26715e+07	5.58963
2	4.3607e+07	5.62923
2	43644364	5.56345
2	4.36865e+07	7.00795
2	4.36955e+07	6.54444
2	4.37943e+07	7.59822
2	43824904	9.50854
2	4.38433e+07	6.16749
2	4.38544e+07	5.01857
2	4.38764e+07	5.4593
2	4.40846e+07	5.8609
2	4.40948e+07	5.17635
2	4.42545e+07	9.54491
2	4.42768e+07	9.27858
2	4.4285e+07	6.38373
2	44294144	8.91256
2	44303260	11.7975
2	4.47253e+07	5.38687
2	4.47342e+07	7.76034
2	45646085	10.7426
2	4.59855e+07	6.8704
2	4.59933e+07	7.78993
2	4.60255e+07	5.10382
2	4.60332e+07	5.92527
2	4.60455e+07	5.89653
2	4.61342e+07	6.67738
2	4.65456e+07	6.84542
2	4.65536e+07	8.65818
2	46566159	6.16092
2	4.66364e+07	6.92784
2	4.66649e+07	6.56626
2	4.91767e+07	5.28286
2	49194726	6.95165
2	4.94246e+07	6.16522
2	4.95245e+07	6.01224
2	4.9686e+07	6.45079
2	4.97549e+07	5.35743
2	4.97647e+07	5.61558
2	5.00225e+07	8.329
2	5.00467e+07	8.70195
2	5.00541e+07	5.58375
2	5.02265e+07	5.32715
2	5.03148e+07	5.10761
2	5.04164e+07	9.25606
2	5.0425e+07	7.40767
2	5.04359e+07	5.64903
2	5.04442e+07	5.07919
2	5.04549e+07	5.74004
2	50504231	6.25407
2	5.05353e+07	6.08985
2	50553160	5.2304
2	5.17361e+07	5.43807
2	5.17446e+07	6.41429
2	5.17653e+07	5.68427
2	5.17862e+07	6.65371
2	5.18452e+07	5.0347
2	52194926	7.02
2	53095194	5.64365
2	53155981	6.83875
2	5.56256e+07	6.06695
2	55634906	6.329
2	5.5702e+07	5.66199
2	5.6406e+07	5.74537
2	5.68046e+07	5.62152
2	5.69361e+07	5.29303
2	5.69653e+07	5.22869
2	5.70953e+07	6.9485
2	57215663	5.72691
2	5.73564e+07	6.52212
2	5.7395e+07	5.16983
2	5.85749e+07	8.16469
2	5.89139e+07	5.10623
2	6.01573e+07	5.03384
2	60524241	5.70327
2	61025299	8.11713
2	61234351	6.14554
2	6.13831e+07	9.03939
2	6.15049e+07	5.844
2	6.5186e+07	5.10859
2	65205063	9.5734
2	6.8585e+07	8.4074
2	6.86263e+07	5.30829
2	6.8855e+07	6.16543
2	6.91258e+07	5.58369
2	6.9164e+07	5.73251
2	6.91943e+07	5.81145
2	6.93742e+07	14.5592
2	6.98251e+07	5.90433
2	7.03667e+07	6.87774
2	71735029	6.6395
2	7.17556e+07	5.55144
2	9.35053e+07	9.01226
2	9.3515e+07	5.24273
2	93543290	6.07317
2	9.36383e+07	6.87343
2	9.36847e+07	9.68465
2	9.37155e+07	5.61928
2	9.37264e+07	7.16161
2	9.37753e+07	8.16604
2	9.38441e+07	14.7076
2	9.38755e+07	11.3675
2	9.39047e+07	10.5947
2	9.39141e+07	5.23795
2	9.39356e+07	11.6625
2	9.39664e+07	7.67692
2	9.39932e+07	6.85081
2	94014354	5.85023
2	9.40338e+07	8.06401
2	9.40458e+07	8.80129
2	9.40547e+07	6.01891
2	9.40753e+07	5.89321
2	94133491	10.3425
2	9.41842e+07	5.82279
2	94234829	8.65447
2	9.4254e+07	9.4816
2	94305886	5.23449
2	9.43247e+07	7.94567
2	9.43655e+07	7.70207
2	94374390	5.91265
2	9.43959e+07	5.04346
2	9.44454e+07	5.07884
2	9.46056e+07	7.72684
2	9.4634e+07	8.24897
2	9.46751e+07	8.22768
2	9.46856e+07	8.85624
2	9.47554e+07	6.68452
2	9.47853e+07	9.46857
2	9.48037e+07	10.2153
2	9.48563e+07	7.09859
2	9.49071e+07	7.40441
2	9.49244e+07	6.13729
2	9.49757e+07	6.0212
2	9.50243e+07	7.37
2	9.50338e+07	6.15319
2	9.51063e+07	6.3527
2	9.51243e+07	9.04322
2	9.51748e+07	7.41595
2	9.51841e+07	7.86502
2	9.52031e+07	9.15867
2	95244402	7.043
2	9.52533e+07	13.1632
2	95272934	6.27611
2	9.5285e+07	8.18402
2	9.5306e+07	6.11905
2	95322876	6.02062
2	9.53363e+07	12.6759
2	9.5355e+07	5.83612
2	95365697	8.14974
2	95388034	8.27955
2	9.54271e+07	8.77992
2	9.54421e+07	6.51504
2	9.54859e+07	13.1066
2	95493233	17.7112
2	9.55144e+07	7.97621
2	9.55442e+07	6.78476
2	9.55772e+07	17.9606
2	9.56357e+07	6.09075
2	9.57772e+07	14.1826
2	9.58331e+07	6.91697
2	9.59257e+07	6.93669
2	9.5963e+07	10.0173
2	9.63552e+07	7.25445
2	96374838	5.36118
2	9.64254e+07	10.4893
2	9.6605e+07	5.46952
2	9.6654e+07	5.28842
2	9.67566e+07	5.5856
2	9.67757e+07	5.28232
2	9.68147e+07	5.03762
2	97353845	5.0332
2	9.79169e+07	6.3051
2	9.80372e+07	7.1848
2	9.81646e+07	6.41149
2	98273988	7.18309
2	9.83552e+07	11.8093
2	9.83677e+07	6.78191
2	9.83963e+07	6.00691
2	9.8415e+07	5.60754
2	98444832	9.35257
2	9.8454e+07	5.98775
2	9.84647e+07	6.14142
2	9.84729e+07	7.76088
2	9.85026e+07	13.3023
2	9.85144e+07	13.8576
2	9.85667e+07	17.8278
2	98579000	5.20757
2	1.03513e+08	5.69024
2	1.06434e+08	6.06298
2	1.07025e+08	5.63718
2	1.07564e+08	5.10241
2	1.07715e+08	9.89212
2	1.08147e+08	6.56585
2	1.08615e+08	7.31803
2	1.08635e+08	10.0718
2	1.08656e+08	6.3028
2	1.08696e+08	9.13788
2	1.08704e+08	6.51288
2	1.08755e+08	8.03903
2	1.08786e+08	8.51123
2	1.08926e+08	5.16247
2	1.09165e+08	6.43422
2	1.09176e+08	8.44139
2	1.09243e+08	5.71044
2	1.09356e+08	6.34882
2	1.09404e+08	5.47636
2	1.09854e+08	6.8117
2	1.09884e+08	7.24235
2	1.09894e+08	5.81529
2	1.09944e+08	7.19305
2	1.09959e+08	7.01923
2	1.10045e+08	6.09295
2	1.10257e+08	12.0027
2	1.10263e+08	5.00389
2	1.10277e+08	6.95183
2	1.10576e+08	5.23068
2	1.10594e+08	5.26613
2	1.10667e+08	5.03304
2	1.10742e+08	6.49077
2	1.11186e+08	7.06035
2	1.11275e+08	6.04878
2	1.11393e+08	8.12078
2	1.11526e+08	7.08701
2	1.11543e+08	5.00784
2	1.11683e+08	5.03836
2	1.11713e+08	5.75565
2	1.11725e+08	7.33661
2	1.11735e+08	5.03609
2	1.12355e+08	5.31024
2	1.12455e+08	6.22849
2	1.12465e+08	6.37446
2	1.12475e+08	9.77139
2	1.12483e+08	11.7405
2	1.12515e+08	10.639
2	1.12716e+08	10.2289
2	1.12745e+08	5.83549
2	1.12755e+08	5.53514
2	1.12876e+08	7.2674
2	113033941	7.41958
2	115144437	8.60801
2	115565912	5.07358
2	115884234	8.91696
2	1.16466e+08	7.25947
2	1.16556e+08	5.17631
2	1.16676e+08	9.63399
2	1.16724e+08	5.35634
2	1.16744e+08	5.97932
2	1.16806e+08	6.69802
2	116943772	6.01848
2	1.16977e+08	6.11667
2	1.16982e+08	6.18104
2	1.17035e+08	5.48828
2	117085917	7.71384
2	1.17097e+08	6.77867
2	1.17146e+08	10.8296
2	1.17202e+08	7.47269
2	1.17234e+08	7.87021
2	1.17916e+08	5.44347
2	1.18314e+08	6.57781
2	119256950	5.38554
2	119355753	8.55504
2	1.19374e+08	7.19289
2	1.19705e+08	8.13821
2	1.19714e+08	6.74734
2	1.19726e+08	8.45032
2	1.19807e+08	5.49296
2	1.19825e+08	7.14357
2	119843356	12.5954
2	1.19855e+08	10.2418
2	119906342	10.3397
2	1.19913e+08	6.72081
2	1.20405e+08	5.19758
3	623282	5.36392
3	1.87486e+06	5.55962
3	2066990	6.08398
3	2.64421e+06	6.87444
3	2.67564e+06	6.23264
3	2.79328e+06	6.82046
3	2.9541e+06	10.769
3	3.02407e+06	5.02893
3	3.28513e+06	7.95824
3	3.32599e+06	5.06662
3	3.39514e+06	6.15545
3	4.73607e+06	5.01779
3	8.89466e+06	6.26066
3	1.16639e+07	9.89732
3	1.17071e+07	5.24612
3	1.17169e+07	6.5788
3	1.17444e+07	5.16325
3	11783218	7.7357
3	1.18036e+07	7.95809
3	1.18325e+07	7.53751
3	1.18574e+07	5.33476
3	1.19333e+07	6.85961
3	1.21438e+07	5.84172
3	1.21736e+07	5.1704
3	1.22464e+07	10.3482
3	12294623	9.2388
3	12425970	6.78306
3	1.24742e+07	6.83444
3	12514920	7.16927
3	1.25249e+07	6.85797
3	1.26148e+07	6.7501
3	1.26548e+07	14.9385
3	1.26846e+07	6.41993
3	1.27055e+07	12.8525
3	1.27369e+07	8.73637
3	1.27548e+07	5.83503
3	1.28355e+07	13.7355
3	1.28453e+07	7.35046
3	1.28861e+07	12.6602
3	1.28965e+07	6.47631
3	1.29159e+07	9.21404
3	1.29236e+07	5.71404
3	1.29739e+07	8.33119
3	1.45835e+07	5.57036
3	1.54025e+07	6.39628
3	1.78121e+07	6.27381
3	17946559	8.96651
3	17966522	5.43825
3	1.80229e+07	5.60265
3	1.87645e+07	5.71085
3	1.88326e+07	5.90876
3	1.92336e+07	6.34096
3	1.92438e+07	5.41977
3	1.92533e+07	6.60229
3	19391279	5.45277
3	2.10352e+07	5.21549
3	21185506	8.44058
3	2.12051e+07	6.84755
3	2.30667e+07	6.56569
3	2.31553e+07	5.07829
3	2.32742e+07	5.08401
3	2.33964e+07	8.62921
3	2.34638e+07	5.94293
3	2.3995e+07	5.98477
3	2.41233e+07	6.35745
3	24575218	5.17857
3	2.52355e+07	5.58748
3	2.52753e+07	7.48504
3	25445764	5.85631
3	25783843	7.88732
3	2.58044e+07	9.21405
3	2.58468e+07	8.70859
3	25926107	7.16346
3	26224512	5.76314
3	2.6496e+07	7.07939
3	2.65138e+07	5.3753
3	2.6685e+07	5.93272
3	2.66963e+07	5.06122
3	26764348	5.84866
3	2.73044e+07	6.44365
3	2.76943e+07	10.0939
3	3.83259e+07	6.49723
3	4.24152e+07	5.35626
3	4.67638e+07	5.14409
3	5.22922e+07	5.76772
3	5.23232e+07	5.96723
3	52584872	6.0112
3	5.37836e+07	5.40748
3	5.39059e+07	5.26421
3	5.39864e+07	6.73217
3	5.40945e+07	5.52092
3	54125455	7.08501
3	5.41365e+07	7.17203
3	5.4233e+07	6.29382
3	5.42427e+07	7.5912
3	5.42552e+07	10.2329
3	5.43536e+07	6.50517
3	54374574	6.28762
3	5.45451e+07	5.68453
3	5.47285e+07	10.8649
3	54737514	7.01669
3	5.47447e+07	5.26397
3	5.48045e+07	7.23674
3	5.48855e+07	5.36111
3	55014915	6.08734
3	5.51149e+07	9.58891
3	5.52341e+07	6.8949
3	5.53154e+07	5.79329
3	55425557	5.64317
3	55605310	7.12189
3	5.57081e+07	15.4161
3	5.57243e+07	7.38746
3	5.57452e+07	6.42094
3	5.57556e+07	5.86599
3	5.5806e+07	10.8997
3	55835213	6.13806
3	5.58949e+07	7.27239
3	55934947	6.2168
3	56003144	5.35137
3	5.61849e+07	8.27761
3	5.61984e+07	5.05975
3	5.62248e+07	5.38001
3	5.63732e+07	6.14666
3	5.6404e+07	5.68243
3	5.76059e+07	5.98723
3	5.78469e+07	5.04058
3	5.79246e+07	10.547
3	57932722	12.4507
3	5.79855e+07	7.3211
3	5.80471e+07	5.42452
3	5.8105e+07	6.87791
3	5.8204e+07	7.70893
3	5.82538e+07	8.93343
3	5.82636e+07	7.0065
3	6.22426e+07	5.89835
3	6.29634e+07	6.0008
3	6.30236e+07	5.49676
3	6.32244e+07	7.09226
3	6.60043e+07	11.7242
3	6.60132e+07	8.39863
3	6.81859e+07	7.28152
3	6.82242e+07	5.68978
3	6.83152e+07	7.8448
3	6.83543e+07	8.04496
3	6.83944e+07	6.93366
3	6.84144e+07	7.54798
3	6.84235e+07	6.49646
3	6.84451e+07	12.1795
3	6.85151e+07	6.80454
3	6.85261e+07	5.90644
3	6.93056e+07	7.74026
3	6.97679e+07	8.61998
3	7.10631e+07	8.85307
3	7.19738e+07	5.02758
3	7.21461e+07	6.38004
3	7.2176e+07	5.5721
3	7.2684e+07	6.92929
3	7.26964e+07	6.60309
3	7.27561e+07	6.65221
3	7.27965e+07	6.15162
3	7.28041e+07	5.19528
3	7.32172e+07	6.00676
3	7.33343e+07	7.21706
3	7.3463e+07	7.69915
3	7.35143e+07	7.92926
3	7.57144e+07	9.22051
3	7.57363e+07	5.85618
3	7.57444e+07	20.9257
3	7.57638e+07	8.42964
3	7.57847e+07	5.50377
3	76354739	5.63886
3	76383633	5.0147
3	7.64056e+07	5.18556
3	7.76565e+07	5.87768
3	7.7735e+07	5.55669
3	78065492	8.87012
3	78083116	7.77198
3	7.81056e+07	5.62081
3	7.82571e+07	5.80639
3	7.83072e+07	7.42858
3	7.83379e+07	7.37438
3	8.11174e+07	5.72382
3	8.3455e+07	5.27172
3	9.8156e+07	5.02091
3	1.03444e+08	5.43136
3	1.03695e+08	6.33104
3	1.04366e+08	5.73966
3	1.04395e+08	7.49913
3	1.04736e+08	8.21301
3	1.04757e+08	7.27584
3	104821147	11.0491
3	1.04866e+08	6.19763
3	1.05296e+08	6.69984
3	1.11273e+08	5.89482
3	1.13244e+08	5.13836
4	2801824	8.61757
4	2.92345e+06	9.57989
4	2.99389e+06	5.28577
4	3.03628e+06	6.24592
4	3.08378e+06	6.69921
4	1.3397e+07	5.70909
4	1.4401e+07	8.54212
4	1.44348e+07	5.10388
4	16624030	5.68174
4	1.67265e+07	5.09758
4	1.67338e+07	5.85523
4	1.67546e+07	5.70724
4	16836471	7.37048
4	1.79232e+07	5.54153
4	1.81565e+07	5.4961
4	1.83766e+07	6.00245
4	1.84549e+07	5.17807
4	19335729	6.1478
4	1.94757e+07	5.92386
4	1.95632e+07	5.70228
4	1.98252e+07	7.25464
4	1.98527e+07	5.95924
4	1.99218e+07	7.87906
4	1.99943e+07	5.90786
4	20154913	7.64733
4	2.19458e+07	5.66499
4	2.19535e+07	12.3387
4	2.19648e+07	7.46513
4	22033762	5.54598
4	22102707	6.07087
4	2.21329e+07	6.28422
4	2.2185e+07	8.61173
4	2.22341e+07	5.82986
4	2.22544e+07	5.32773
4	22435435	5.6754
4	2.24845e+07	5.04218
4	2.25251e+07	5.92008
4	2.25853e+07	5.29034
4	2.26159e+07	7.37197
4	22664409	6.72591
4	2.2716e+07	7.7112
4	2.27357e+07	6.51503
4	2.28552e+07	6.03363
4	2.28735e+07	5.25929
4	22973755	5.82017
4	2.29949e+07	6.15527
4	2.30165e+07	5.72302
4	2.30677e+07	6.57379
4	2.30745e+07	5.61397
4	2.31237e+07	5.1305
4	2.3155e+07	6.02219
4	23187038	8.27991
4	2.32149e+07	7.14239
4	23224205	6.87779
4	2.32344e+07	5.30977
4	2.34555e+07	6.86592
4	23495637	7.63161
4	2.35928e+07	5.61708
4	2.3734e+07	5.03486
4	23751845	8.2946
4	2.37941e+07	9.25448
4	2.3955e+07	5.81837
4	2.39637e+07	7.20073
4	23977080	6.02047
4	24014145	5.71457
4	2.4146e+07	7.81726
4	2.41952e+07	5.26494
4	2.42664e+07	9.60315
4	2.53158e+07	6.23194
4	2.55644e+07	6.61692
4	26184696	5.98852
4	2.65675e+07	5.10477
4	2.69338e+07	5.0452
4	27026116	5.23216
4	2.74743e+07	5.85253
4	27507618	6.14456
4	2.76136e+07	5.72421
4	2.88846e+07	6.53782
4	3.12749e+07	6.50145
4	3.2916e+07	5.32421
4	33263263	5.43824
4	3.34328e+07	5.9002
4	3.35458e+07	5.56254
4	3.35558e+07	5.16031
4	3.36642e+07	5.59793
4	3.37732e+07	5.47512
4	33825507	5.77668
4	3.38449e+07	6.881
4	3.39146e+07	8.00007
4	3.4264e+07	5.25197
4	3.42968e+07	5.21251
4	3.43157e+07	5.21048
4	3.43244e+07	5.79749
4	3.46261e+07	5.66372
4	3.46569e+07	5.46826
4	3.52857e+07	8.37768
4	4.4606e+07	5.65974
4	53313601	5.41654
4	5.33548e+07	5.94665
4	53426123	6.69949
4	5.34434e+07	5.27646
4	5.38562e+07	5.67555
4	5.8107e+07	6.66771
4	5.81937e+07	6.80208
4	5.90559e+07	6.51775
4	5.92867e+07	7.83882
4	5.93625e+07	5.42136
4	5.94184e+07	5.09502
4	5.94459e+07	5.92694
4	60466255	5.38548
4	6.0477e+07	6.70812
4	6.18046e+07	10.1843
4	6.20152e+07	10.4719
4	6.26349e+07	6.21421
4	6.26431e+07	5.17832
4	6.41827e+07	7.12358
4	6.4415e+07	5.47936
4	6.52034e+07	5.08492
4	65265352	5.89717
4	65344486	5.86811
4	6.53635e+07	5.35164
4	6.78657e+07	8.42381
4	6.7877e+07	5.83961
4	7.47528e+07	5.11446
4	8.39849e+07	7.98371
4	8.73559e+07	7.11031
4	8.75242e+07	5.01139
4	8.75471e+07	5.98692
4	87894199	7.99125
4	8.79259e+07	5.96092
4	8.79331e+07	6.75027
4	8.79454e+07	5.7266
4	8.79638e+07	5.32755
4	87974641	6.46013
4	9.41333e+07	5.50113
4	96342847	7.46838
4	9.63533e+07	6.87583
4	9.63949e+07	5.55471
4	96531751	6.02274
4	9.66152e+07	5.19611
4	96657915	8.94881
4	96685356	6.96701
4	1.00613e+08	6.08364
4	100917252	14.9675
4	1.01066e+08	7.06492
4	1.01093e+08	5.22018
4	1.01106e+08	7.91181
4	1.01386e+08	7.48599
4	1.01404e+08	6.76427
4	1.01496e+08	5.96378
4	1.01875e+08	7.01945
4	104355111	5.3059
4	106747371	8.99211
4	1.06755e+08	7.31078
4	1.06775e+08	5.61955
4	107263301	6.03083
4	1.07295e+08	8.39507
5	3.96746e+06	5.45723
5	3.98397e+06	6.26298
5	4.24455e+06	5.38007
5	4.7949e+06	6.0362
5	6.67442e+06	5.31281
5	6684866	5.90914
5	6696731	6.10294
5	6.70291e+06	5.17581
5	6.92523e+06	5.42831
5	7367235	5.26525
5	8.38591e+06	5.35588
5	8.87557e+06	5.70469
5	1.52141e+07	6.27967
5	1.71254e+07	6.25116
5	1.71457e+07	6.56723
5	1.71643e+07	7.56844
5	17275164	5.03127
5	1.74242e+07	8.8035
5	1.76653e+07	6.96873
5	1.97164e+07	10.7145
5	19724131	7.95073
5	20392479	5.22837
5	2.04148e+07	8.25128
5	2.04249e+07	5.87485
5	20455348	6.38238
5	2.04752e+07	9.45338
5	2.05465e+07	5.23484
5	2.13364e+07	6.37851
5	21383055	5.52886
5	21397229	5.26013
5	2.14341e+07	5.0035
5	2.15246e+07	5.78546
5	2.15849e+07	5.86714
5	2.20933e+07	5.25724
5	2.22967e+07	8.21363
5	2.26717e+07	9.65089
5	2.7774e+07	6.72888
5	2.80355e+07	6.84055
5	28246899	8.37896
5	2.8544e+07	7.97511
5	2.95352e+07	5.31733
5	2.98245e+07	5.2439
5	2.99757e+07	7.14236
5	29984488	6.28157
5	2.99962e+07	7.09858
5	3.01165e+07	7.16451
5	3.04688e+07	6.73684
5	3.06718e+07	5.79797
5	3.15253e+07	5.00321
5	3.26543e+07	5.02528
5	3.42065e+07	5.42738
5	3.43167e+07	7.23009
5	3.43642e+07	5.37192
5	3.44046e+07	6.91573
5	3.44749e+07	6.12289
5	3.49748e+07	6.57206
5	3.60424e+07	5.60604
5	3.62056e+07	6.69365
5	3.76846e+07	5.00558
5	3.88562e+07	5.60396
5	38864704	9.0519
5	3.89048e+07	6.32978
5	4.49156e+07	5.05302
5	45987578	5.541
5	5.04634e+07	5.37905
5	5.34651e+07	7.24806
5	5.49244e+07	6.00161
5	5.49461e+07	6.11526
5	5.49632e+07	5.97154
5	54971591	7.04473
5	5.54849e+07	5.0408
5	55598529	8.31012
5	5.56275e+07	5.11772
5	55674571	6.19664
5	5.57257e+07	8.02658
5	5.57747e+07	7.5262
5	5.58032e+07	6.25617
5	5.58366e+07	5.69256
5	5.61146e+07	7.93377
5	5.61256e+07	7.21993
5	5.61363e+07	13.6629
5	5.61652e+07	6.1899
5	5.61857e+07	5.39693
5	5.80242e+07	6.81018
5	5.80757e+07	7.63701
5	5.8215e+07	5.57523
5	5.82876e+07	5.88718
5	5.83236e+07	7.56681
5	5.83559e+07	6.77954
5	5.84353e+07	6.49166
5	5.84775e+07	9.72386
5	5.92439e+07	5.31111
5	5.92639e+07	5.00645
5	5.92739e+07	6.75807
5	5.93556e+07	6.06855
5	5.93963e+07	5.64073
5	6.4936e+07	5.60477
5	6.49858e+07	7.5519
5	65005008	8.82898
5	6.50458e+07	5.12878
5	6.50865e+07	7.11074
5	6.51575e+07	7.35919
5	6.52349e+07	6.26828
5	6.52452e+07	5.07769
5	6.52835e+07	12.9655
5	6.53955e+07	7.31003
5	65465435	7.41528
5	6.55171e+07	5.86785
5	6.56144e+07	5.39855
5	6.6984e+07	7.56941
5	6.7174e+07	5.6347
5	6.71865e+07	6.36212
5	6.88253e+07	6.47635
5	6.88946e+07	8.82849
5	68925937	5.11121
5	7.49049e+07	5.94482
5	7.52544e+07	6.11032
5	8.26659e+07	5.10959
5	8.58934e+07	5.631
5	8.65273e+07	5.16207
5	92697190	7.37181
5	9.67456e+07	6.98904
5	99104383	7.10441
6	6.3948e+06	6.60364
6	7.09238e+06	5.17719
6	1.11539e+07	5.35383
6	11197242	6.18138
6	1.48122e+07	9.4938
6	1.48343e+07	6.91851
6	1.4986e+07	5.71776
6	1.60667e+07	5.9323
6	1.61155e+07	6.12086
6	1.62943e+07	6.11419
6	16303397	8.13567
6	1.63359e+07	9.44764
6	16402951	5.23668
6	1.6798e+07	6.806
6	16816118	6.27515
6	1.76865e+07	6.78529
6	1.79966e+07	5.10625
6	1.81462e+07	5.11426
6	1.81855e+07	5.37543
6	1.82929e+07	5.81259
6	19055578	5.42411
6	1.96162e+07	5.23133
6	1.97151e+07	5.51213
6	19725138	5.42558
6	1.98335e+07	5.09275
6	19853874	5.38178
6	1.99254e+07	5.32478
6	19954410	6.14351
6	1.99655e+07	5.21194
6	2.16172e+07	7.39875
6	2.16254e+07	5.18059
6	2.31761e+07	5.53915
6	2.33038e+07	5.4522
6	2.33332e+07	5.41162
6	24214400	7.43568
6	25055072	6.19467
6	2.50752e+07	7.65032
6	2.53948e+07	7.13615
6	25496334	5.06656
6	2.55256e+07	5.72355
6	2.55358e+07	5.68166
6	2.55445e+07	5.77776
6	2.65665e+07	5.44052
6	2.69132e+07	5.7116
6	2.70663e+07	9.99402
6	3.04336e+07	5.69003
6	3.04471e+07	6.41614
6	3.05264e+07	8.29449
6	30572926	6.39946
6	3.06736e+07	6.20614
6	3.06865e+07	7.44237
6	3.06948e+07	6.71705
6	3.07056e+07	9.53153
6	3.07244e+07	9.4941
6	3.07536e+07	6.32395
6	3.10868e+07	7.30906
6	3.12842e+07	8.46474
6	3.13346e+07	6.43687
6	3.1344e+07	6.78124
6	3.24257e+07	9.63961
6	3.24651e+07	9.36707
6	3.28953e+07	5.44612
6	3.31036e+07	5.30281
6	3.82456e+07	5.29364
6	4.03957e+07	8.90776
6	4.04039e+07	7.57986
6	4.06138e+07	5.29113
6	4.06539e+07	5.7593
6	4.06648e+07	6.46579
6	4.07347e+07	5.1236
6	4.08645e+07	7.36701
6	4.08851e+07	6.39412
6	4.08942e+07	5.24566
6	4.40763e+07	6.63739
6	44104802	10.8655
6	44116078	6.48696
6	4.63643e+07	5.85214
6	4.66943e+07	7.5194
6	4.67057e+07	5.29339
6	4.67136e+07	8.1024
6	4.74949e+07	5.16312
6	4.8225e+07	5.42858
6	4.86077e+07	5.50167
6	4.88347e+07	5.01249
6	4.89144e+07	5.11694
6	5.01541e+07	6.65935
6	50584602	6.45363
6	5.28243e+07	5.37368
6	53934902	5.1821
6	5.5313e+07	5.22986
6	55555228	6.28553
6	5.55674e+07	5.96454
6	7.3096e+07	6.51692
6	73163151	7.92961
6	7.31732e+07	7.28705
6	7.32548e+07	5.99489
6	7.32647e+07	7.51939
6	7.33677e+07	8.15828
6	7.34059e+07	6.5008
6	7.34153e+07	7.48817
6	7.34355e+07	5.36248
6	7.34641e+07	10.0681
6	73585523	6.22407
6	7.36541e+07	6.85153
6	7.36954e+07	5.34321
6	7.37073e+07	6.5867
6	7.37252e+07	9.44491
6	7.37432e+07	7.61188
6	7.37558e+07	13.739
6	7.37864e+07	14.8589
6	7.38165e+07	7.62988
6	7.38663e+07	5.22222
6	7.39347e+07	5.43693
6	7.39463e+07	6.44889
6	7.47963e+07	7.37617
6	7.48053e+07	5.95361
6	7.58754e+07	5.71239
6	7.64546e+07	6.30478
6	76473386	8.55273
6	8.13642e+07	5.22068
6	8.1475e+07	8.53375
6	8.15345e+07	11.1052
6	8.22637e+07	5.94389
6	8.23353e+07	5.26653
6	8.25151e+07	5.40389
6	8.26645e+07	10.0918
6	8.43959e+07	6.78462
7	178423	5.88692
7	185803	7.07778
7	5.50401e+06	8.3572
7	5.52947e+06	11.7487
7	5.5345e+06	13.7878
7	5552795	7.033
7	5.70413e+06	9.01519
7	5.715e+06	7.69645
7	5.72648e+06	6.15975
7	5.75402e+06	5.92205
7	5.78458e+06	5.75858
7	5.80803e+06	5.87659
7	5.81553e+06	5.17709
7	1.25849e+07	7.69503
7	1.5664e+07	5.05718
7	17165969	5.68555
7	1.79344e+07	7.67216
7	1.8124e+07	6.46482
7	1.82859e+07	5.22026
7	2.06869e+07	8.13469
7	2.10041e+07	5.21736
7	3.56366e+07	6.61942
7	6.55568e+07	7.45459
7	6.5655e+07	5.97584
7	7.12947e+07	5.38696
7	7.21353e+07	5.6441
7	73215918	5.93216
7	7.32364e+07	5.5586
7	7.54545e+07	6.25396
7	7.58655e+07	5.05941
7	7.58929e+07	6.156
7	7.60863e+07	5.11993
7	7.61952e+07	8.17514
7	7.66666e+07	6.28345
7	7.66856e+07	5.84012
7	7.6815e+07	5.43122
7	7.69131e+07	5.92311
7	7.98071e+07	5.74004
7	8.02446e+07	5.91248
7	8.02566e+07	7.58443
7	8.0524e+07	5.34921
7	81046927	5.59937
7	8.10669e+07	5.2353
7	8.1087e+07	5.32717
7	8.11733e+07	7.65676
7	8.1195e+07	6.62193
7	8.13937e+07	6.1508
7	8.16556e+07	11.6058
7	81665342	6.24452
7	8.16754e+07	12.3545
7	81744390	12.2514
7	8.18035e+07	6.82417
7	8.53345e+07	5.12513
7	8.69439e+07	5.22229
7	8.81252e+07	5.37815
7	8.83247e+07	6.04694
7	8.84257e+07	5.55737
7	9.16745e+07	5.31985
7	9.16856e+07	6.17922
8	6593989	5.24425
8	6.61481e+06	6.43689
8	6.626e+06	6.00536
8	6.63583e+06	5.66014
8	13633973	5.30193
8	1.54637e+07	6.24442
8	1.64269e+07	6.35184
8	1.6446e+07	10.309
8	19335271	10.7797
8	1.93662e+07	9.31819
8	1.93751e+07	8.42172
8	1.96067e+07	7.56159
8	1.96156e+07	6.52306
8	1.99243e+07	5.19885
8	2.08481e+07	6.96328
8	2.34832e+07	6.36269
8	4.73943e+07	5.27257
8	5.37472e+07	5.55237
8	5.66153e+07	6.19979
8	5.6684e+07	6.08427
8	5.67027e+07	9.66763
8	5.85856e+07	5.19907
8	5.86151e+07	8.73663
8	5.86451e+07	7.1394
8	5.86744e+07	9.85103
8	58684122	10.6155
8	5.87151e+07	9.04277
8	5.87553e+07	9.83985
8	5.87657e+07	6.77484
8	5.87735e+07	5.5981
8	58785825	6.5174
8	5.88139e+07	8.35119
8	58824025	6.32204
8	5.88425e+07	6.98056
8	5.88531e+07	9.0756
8	5.88755e+07	7.85008
8	6.24334e+07	5.13437
8	62495776	5.67024
8	6.28965e+07	5.52976
8	6.42656e+07	6.58119
8	64435555	6.22692
8	6.46443e+07	5.09436
8	6.46947e+07	5.08171
8	6.47559e+07	5.37425
8	6.4835e+07	9.02587
8	6.48733e+07	7.51432
8	6.50446e+07	5.79712
8	6.50841e+07	5.63991
8	6.53235e+07	5.65917
8	6.6204e+07	5.30934
8	6.94845e+07	7.25432
8	7.13849e+07	6.02557
8	71683929	5.2158
8	71806683	5.56656
8	7.19342e+07	7.88932
8	72224898	7.11867
8	7.45883e+07	5.3282
8	8.01936e+07	6.55891
8	80283942	7.9427
8	8.02957e+07	7.53402
8	80306720	7.77201
8	8.03226e+07	7.61568
8	8.03541e+07	5.8939
8	80457062	8.19041
8	8.05048e+07	5.59355
8	8.17465e+07	5.92626
8	8.19462e+07	5.67463
8	82666832	10.81
8	8.27933e+07	7.79097
8	8.28377e+07	6.83977
8	8.2886e+07	6.13651
8	8.29362e+07	5.40996
8	8.34444e+07	5.945
8	8.43161e+07	6.06857
8	85396093	5.65345
8	85423958	7.16176
8	8.54848e+07	5.99207
8	85642643	5.26443
8	85668851	6.95921
8	8.57268e+07	6.08781
8	8.57362e+07	6.69565
8	8.57451e+07	7.96242
8	8.57847e+07	7.13184
8	8.59846e+07	5.70372
8	86233543	6.0705
8	8.62737e+07	6.39805
8	9.07635e+07	6.34701
8	92964802	8.47494
9	15342.2	5.26151
9	256289	5.36534
9	1.23754e+07	7.07133
9	1.47674e+07	6.74405
9	1.51238e+07	7.76061
9	1.51847e+07	5.72185
9	1.52145e+07	6.06519
9	1.52258e+07	11.4783
9	15244102	6.12541
9	1.52635e+07	8.90842
9	1.53855e+07	5.12374
9	1.54336e+07	5.44259
9	1.59933e+07	5.45135
9	16295136	5.8019
9	1.87267e+07	5.03179
9	19445032	5.59284
9	1.94846e+07	6.15929
9	1.95052e+07	6.88593
9	19604136	5.63306
9	2.16632e+07	6.90651
9	2.20535e+07	5.57217
9	2.21051e+07	5.32602
9	2.31532e+07	5.32926
9	25986001	5.71252
9	2.60341e+07	6.8593
9	2.76853e+07	9.99204
9	2.77145e+07	6.09616
9	2.78256e+07	10.116
9	2.85421e+07	5.3178
9	2.85625e+07	5.43942
9	30983585	5.09849
9	52314148	5.24181
9	5.24761e+07	5.02114
9	52543074	6.48436
9	52716078	5.74113
9	5.62052e+07	6.20979
9	5.87359e+07	6.71444
9	58745908	8.16466
9	5.90574e+07	8.34675
9	5.91133e+07	8.21212
9	5.91638e+07	6.01253
9	59264478	6.52482
9	59304442	7.60642
9	5.93322e+07	6.15714
9	59345206	8.77733
9	5.93628e+07	6.577
9	5.93947e+07	5.64585
9	5.94049e+07	5.76819
9	5.94756e+07	6.32275
9	5.96648e+07	5.18809
9	59814275	6.96027
9	5.99555e+07	6.41043
9	5.99658e+07	5.79515
9	6.00162e+07	5.30855
9	6.00554e+07	6.59252
9	6.00636e+07	8.56258
9	6.01952e+07	5.73403
9	6.02145e+07	5.21573
9	6.03543e+07	5.75575
9	6.03755e+07	7.3124
9	60464514	5.81709
9	6.04745e+07	6.76618
9	60504439	12.7984
9	6.05146e+07	5.73291
9	60524129	13.2715
9	6.05544e+07	10.1695
9	6.06141e+07	9.13549
9	6.06845e+07	5.09698
9	6.0713e+07	5.7687
9	6.24254e+07	6.03315
9	6.29529e+07	5.74368
9	6.54167e+07	6.5213
9	6.60355e+07	5.628
9	66385337	5.37237
9	6.95853e+07	6.27559
9	6.9593e+07	6.86507
9	6.96462e+07	5.87668
9	6.96567e+07	5.17743
9	6.97856e+07	5.70406
9	69834702	6.76249
9	6.98758e+07	5.40513
9	6.98935e+07	5.26183
9	69922814	8.55792
9	70576397	5.54881
9	7.06755e+07	5.44704
9	7.07358e+07	13.5081
9	7.07649e+07	10.1302
9	7.0795e+07	9.80698
9	7.08141e+07	11.2353
9	7.08367e+07	5.71032
9	7.08645e+07	6.12459
9	7.56234e+07	5.17521
9	7.60061e+07	6.52321
9	7.60147e+07	5.08552
9	77255357	6.26944
9	7.72661e+07	7.24233
9	7.73644e+07	5.33849
9	7.73764e+07	5.59526
10	1.16477e+06	10.2983
10	1.35884e+06	7.83172
10	1.39559e+06	5.55622
10	1.40349e+06	5.01258
10	1.50954e+07	5.39576
10	1.61853e+07	5.73032
10	16983334	11.9255
10	17022757	5.69346
10	1.70332e+07	6.23825
10	1.70469e+07	9.19529
10	17104144	6.4849
10	1.71469e+07	6.73909
10	1.71942e+07	5.16164
10	1.75457e+07	5.85657
10	1.82561e+07	6.28183
10	19883722	5.57791
10	20405090	6.49852
10	20926478	6.71094
10	2.13064e+07	5.30905
10	2.13125e+07	6.4665
10	2.13446e+07	9.47617
10	2.13556e+07	8.61333
10	2.15054e+07	5.02969
10	2.15258e+07	7.40975
10	2.15454e+07	5.03647
10	2.15727e+07	6.11692
10	2.15853e+07	7.47771
10	21595047	6.10264
10	21614872	8.43961
10	21625411	6.89415
10	2.16942e+07	7.00295
10	2.17051e+07	7.38994
10	2.18254e+07	7.04529
10	22124839	6.15375
10	22162291	7.94709
10	2.22021e+07	7.25079
10	2.2216e+07	5.41985
10	2.23365e+07	5.01165
10	2.24539e+07	5.40641
10	2.2696e+07	11.9888
10	22702257	5.76053
10	2.32258e+07	5.82558
10	23244548	9.59089
10	2.32562e+07	7.78383
10	23264391	5.23886
10	2.32866e+07	7.75245
10	2.33158e+07	5.7097
10	2.33265e+07	6.72915
10	2.33536e+07	6.31276
10	2.33677e+07	5.26309
10	2.34236e+07	6.71064
10	2.3557e+07	9.97313
10	2.35748e+07	16.5668
10	2.3583e+07	14.0219
10	2.35941e+07	9.21291
10	2.36154e+07	5.46994
10	2.36251e+07	7.21041
10	2.36356e+07	6.05294
10	2.36539e+07	5.23095
10	2.3678e+07	7.33074
10	2.36869e+07	9.27508
10	2.37245e+07	5.42297
10	2.3737e+07	12.071
10	2.37951e+07	6.76761
10	2.38051e+07	9.61868
10	2.38248e+07	6.78891
10	2.38337e+07	9.383
10	2.38649e+07	7.16707
10	2.38753e+07	7.93876
10	23894011	8.10351
10	23914737	6.62465
10	2.39338e+07	5.73688
10	2.39569e+07	12.1739
10	23974647	10.4973
10	2.39855e+07	13.2017
10	2.40082e+07	5.83687
10	2.40144e+07	11.6895
10	2.40262e+07	10.5333
10	24045090	7.45386
10	2.40842e+07	5.59591
10	2.40961e+07	5.97456
10	2.41085e+07	9.31344
10	2.41351e+07	7.065
10	24145011	7.94229
10	2.41545e+07	7.67089
10	2.41944e+07	5.25326
10	2.42156e+07	7.03745
10	2.4235e+07	6.11434
10	2.4465e+07	5.80991
10	2.44939e+07	6.95307
10	2.4962e+07	7.52457
10	2.55253e+07	6.05665
10	2.58341e+07	5.18011
10	2.63238e+07	5.49718
10	2.87832e+07	10.3416
10	28795397	8.3565
10	2.92749e+07	5.21577
10	2.93141e+07	7.12552
10	2.98761e+07	5.52121
10	3.02037e+07	5.14527
10	3.04847e+07	5.52153
10	3.14345e+07	5.02417
10	3.14658e+07	5.74958
10	3.14741e+07	5.24941
10	3.14844e+07	6.77343
10	31542376	5.38521
10	3.15671e+07	6.2666
10	31573406	5.2638
10	31634703	5.57245
10	3.16458e+07	5.05953
10	3.16771e+07	19.1734
10	3.17045e+07	8.70323
10	3.17359e+07	5.56684
10	3.17551e+07	6.56205
10	3.17626e+07	5.25265
10	31774680	8.50363
10	3.18339e+07	5.34239
10	3.34434e+07	5.05455
10	3.37073e+07	7.23981
10	3.37659e+07	6.10343
10	3.37853e+07	6.2504
10	3.38039e+07	7.24409
10	3.44265e+07	6.4662
10	3.44954e+07	5.62543
10	3.45523e+07	5.3668
10	3.45754e+07	5.2702
10	3.4757e+07	8.34847
10	3.4763e+07	5.40728
10	3.49253e+07	7.17581
10	34956308	5.93634
10	3.50051e+07	7.69627
10	3.50328e+07	5.34696
10	3.50548e+07	10.4623
10	3.64951e+07	10.4678
10	3.82549e+07	6.75042
10	3.82741e+07	5.17735
10	3.84844e+07	6.17997
10	3.85352e+07	6.77006
10	38594540	5.42608
10	3.87331e+07	8.23412
10	3.88176e+07	8.34667
10	3.95531e+07	5.16468
10	3.97348e+07	7.43291
10	3.97722e+07	6.94666
10	3.98143e+07	7.53129
10	3.98266e+07	5.17759
10	3.98337e+07	5.81106
10	3.98448e+07	5.01784
10	3.98552e+07	9.38085
10	3.98644e+07	5.86892
10	3.9876e+07	7.04348
10	39884120	8.03358
10	3.98952e+07	6.12014
10	3.9935e+07	6.44417
10	3.99667e+07	10.433
10	39974174	9.45779
10	40026513	5.75424
10	4.01045e+07	8.22327
10	4.01252e+07	8.78622
10	4.01653e+07	5.41027
10	4.0295e+07	5.67282
10	40304636	7.35221
10	4.03973e+07	5.23436
10	40424513	5.48487
10	4.04633e+07	5.99193
10	4.05917e+07	7.25857
10	4.06056e+07	5.68667
10	4.07949e+07	6.14392
10	4.08755e+07	8.32696
10	4.09638e+07	10.6219
10	4.09731e+07	7.084
10	4.10738e+07	7.26353
10	4.10946e+07	7.4811
10	4.11547e+07	6.09291
10	4.18435e+07	5.7843
10	4.19453e+07	7.1636
10	4.19662e+07	5.52194
10	4.1985e+07	5.65291
10	4.19945e+07	7.29638
10	4.20231e+07	5.87366
10	4.21163e+07	6.42208
10	4.21353e+07	7.48176
10	4.21651e+07	13.4058
10	42195591	5.62811
10	42203796	6.96109
10	4.22249e+07	8.42084
10	4.22541e+07	6.5105
10	4.22835e+07	5.41581
10	4.23337e+07	8.73776
10	4.2715e+07	5.64669
10	4.27739e+07	8.02288
10	4.28154e+07	5.06483
10	4.28926e+07	7.27299
10	4.3136e+07	11.2602
10	43145064	10.2688
10	4.32472e+07	5.81471
10	4.33135e+07	9.24377
10	4.33258e+07	5.03939
10	4.33351e+07	5.51177
10	4.33871e+07	5.19766
10	4.34683e+07	5.40958
10	4.35148e+07	5.29355
10	4.35334e+07	6.20623
10	4.52442e+07	6.08641
10	4.52565e+07	5.63621
10	4.52868e+07	5.32088
10	4.54351e+07	9.2468
10	4.55435e+07	5.81293
10	45572513	5.75298
10	4.56353e+07	5.69605
10	45675488	6.70728
10	4.57152e+07	5.15456
10	45723253	6.73572
10	45755181	5.73453
10	45844502	10.2541
10	4.5852e+07	7.42241
10	45882876	9.9945
10	4.59085e+07	5.3196
10	47215801	7.61737
10	47523688	5.24633
10	48702601	5.42411
10	4.8735e+07	5.07425
10	4.9067e+07	5.15231
10	4.90733e+07	8.545
10	5.01351e+07	5.90501
10	5.18549e+07	8.50778
10	5.18653e+07	9.70388
10	5.18746e+07	7.13756
10	5.18859e+07	9.56315
10	5.18961e+07	5.2777
10	5.24055e+07	5.09898
10	5.2425e+07	5.68516
10	5.34758e+07	5.68573
10	5.35065e+07	5.85605
10	5.40648e+07	5.79563
10	5.40959e+07	5.25461
10	5.41141e+07	7.49783
10	55637011	5.55955
10	55693886	7.6581
10	5.63931e+07	5.28266
10	5.69537e+07	5.6041
10	57742443	7.75822
10	58743263	5.79643
10	5.89151e+07	5.37262
10	5.89239e+07	7.12222
10	5.91968e+07	7.15903
10	59274455	5.64192
10	5.99338e+07	6.44307
10	6.24155e+07	5.45264
10	6.66227e+07	7.67299
10	6.66426e+07	5.46266
10	6.78258e+07	6.98071
10	7.01259e+07	5.05115
10	7.07754e+07	5.26073
10	71177894	7.06972
10	7.1365e+07	8.10814
10	7.14238e+07	6.20525
10	71434624	8.16018
10	7.14763e+07	7.22832
10	7.14847e+07	11.8351
10	7.15228e+07	8.70221
10	7.16249e+07	6.6597
10	7.17529e+07	5.18693
10	71844158	6.1753
10	71904112	11.5345
10	7.19154e+07	8.80718
10	72097812	6.76326
10	7.21174e+07	6.46414
10	7.22846e+07	9.6536
10	7.30155e+07	7.39842
10	7.30371e+07	5.11797
10	7.30759e+07	5.96358
10	73094565	8.07235
10	7.32454e+07	7.8684
10	7.39351e+07	6.08932
10	7.44228e+07	6.78658
10	7.51751e+07	9.27674
10	75755319	5.97215
10	75772658	5.74341
10	7.62951e+07	5.21452
10	7.68962e+07	7.29039
10	7.76648e+07	5.32262
10	7.76746e+07	6.51792
10	7.79019e+07	5.84165
10	7.87246e+07	5.83569
10	7.87552e+07	7.67242
10	7.89059e+07	6.87049
10	7.90154e+07	5.07713
10	7.92126e+07	7.07586
10	7.95637e+07	5.14914
10	8.06754e+07	5.29532
10	8.0776e+07	5.58383
10	8.35843e+07	6.07291
11	3.86325e+06	11.5612
11	4.1449e+06	7.24324
11	4.15498e+06	5.94471
11	4.16442e+06	6.05362
11	4.18622e+06	5.33479
11	4.1957e+06	5.57925
11	4.21433e+06	6.12675
11	4.48303e+06	5.86109
11	4537361	5.85723
11	4.6468e+06	5.75669
11	4.72545e+06	7.84388
11	5475034	5.72227
11	5492699	5.55617
11	9302199	5.0896
11	9.77707e+06	5.75113
11	9993483	7.39872
11	1.0006e+07	8.75067
11	1.00378e+07	11.3945
11	10045964	10.3562
11	1.00635e+07	7.79205
11	1.00961e+07	6.60262
11	1.01033e+07	6.44908
11	1.0126e+07	8.81912
11	1.41559e+07	5.49592
11	1.42148e+07	5.20465
11	1.42459e+07	5.33684
11	1.43669e+07	6.37081
11	1.4604e+07	5.47423
11	1.46232e+07	5.84202
11	1.46545e+07	6.93289
11	1.46675e+07	5.32252
11	1.4755e+07	5.09871
11	1.55827e+07	5.27592
11	1.57744e+07	5.47668
11	1.57833e+07	9.54549
11	1.58042e+07	6.91596
11	1.69558e+07	5.78757
11	16984006	5.38252
11	21163813	6.32113
11	2.41962e+07	6.74109
11	2.42656e+07	8.39951
11	2.43646e+07	5.75402
11	2.43747e+07	6.23752
11	2.56851e+07	5.72432
11	26353330	6.39714
11	3.05758e+07	6.09486
11	30615321	5.76056
11	3.06253e+07	7.34532
11	3.06734e+07	6.14578
11	3.06867e+07	10.0537
11	3.06936e+07	6.24373
11	3.07759e+07	6.55925
11	3.07862e+07	7.36462
11	3.08156e+07	5.90159
11	3.08651e+07	5.01127
11	30897278	7.51271
11	3.09046e+07	6.83402
11	30914474	6.18074
11	3.09351e+07	10.9135
11	3.09429e+07	6.74505
11	3.0976e+07	6.0784
11	3.09935e+07	6.99389
11	3.10035e+07	9.0842
11	3.22175e+07	6.33986
11	3.42113e+07	5.4612
11	3.42924e+07	5.87656
11	3.43852e+07	5.13657
11	3.45065e+07	6.22603
11	3.45845e+07	6.71966
11	3.46259e+07	8.48702
11	3.4636e+07	6.58161
11	3.4656e+07	8.77863
11	3.46952e+07	6.19553
11	3.47456e+07	8.99527
11	3.49078e+07	5.70722
11	3.58933e+07	5.56277
11	3.59038e+07	5.3251
11	3.60663e+07	7.04843
11	3.60743e+07	8.63693
11	3.60961e+07	5.14147
11	3.61037e+07	7.33013
11	3.61129e+07	5.36397
11	3.61257e+07	6.70624
11	3.61351e+07	7.58922
11	3.61454e+07	7.13061
11	36156446	6.13048
11	3.61636e+07	5.08656
11	36445694	6.3862
11	3.78134e+07	5.78763
11	3.78257e+07	6.10158
11	3.81832e+07	10.1037
11	38192372	5.90083
11	38253617	11.9464
11	3.82657e+07	5.75188
11	3.82748e+07	13.6182
11	3.82821e+07	11.4061
11	3.82951e+07	12.9755
11	3.83151e+07	6.36995
11	3.83271e+07	19.1551
11	3.83357e+07	26.1639
11	3.84845e+07	5.06423
11	3.85138e+07	9.00148
11	3.85281e+07	7.97722
11	3.87963e+07	8.97706
11	3.88447e+07	6.73823
11	3.88558e+07	8.36273
11	38926496	7.42628
11	3.89462e+07	5.12663
11	3.89662e+07	5.61158
11	3.90261e+07	5.08867
11	3.90355e+07	8.4087
11	3.90564e+07	6.02186
11	3.90647e+07	5.06293
11	3.90843e+07	6.74973
11	3.90968e+07	6.08531
11	3.92549e+07	5.12131
11	3.92961e+07	7.15775
11	3.9483e+07	8.6048
11	3.9505e+07	7.27006
11	39513641	9.66164
11	3.95351e+07	10.8623
11	3.96442e+07	8.40144
11	40446371	5.40433
11	40545129	6.14046
11	4.07233e+07	5.21723
11	4.12349e+07	5.78165
11	4.44845e+07	5.00324
11	4.48733e+07	5.19224
11	46034912	6.11235
11	46334438	6.13002
12	44238.8	5.04524
12	65172	7.18144
12	95412.3	9.2137
12	762483	7.6685
12	825750	8.13945
12	865529	7.26105
12	995199	6.50588
12	1.22518e+06	5.96386
12	1.27785e+06	6.32851
12	1.45244e+06	7.7111
12	1.50515e+06	6.23205
12	1.57608e+06	6.41114
12	1653908	10.1696
12	1.69409e+06	13.978
12	1.75583e+06	7.42902
12	1763705	6.02464
12	1.84456e+06	6.43894
12	1.85452e+06	5.50244
12	1954994	5.69413
12	1.97696e+06	7.97377
12	2.8819e+06	5.82905
12	3.614e+06	5.33154
12	3.65422e+06	6.46837
12	3.75555e+06	7.81343
12	3.76436e+06	13.7475
12	3775287	6.68674
12	3.81423e+06	13.7201
12	3.99595e+06	6.9038
12	6762177	5.69293
12	7.46452e+06	5.174
12	8.41263e+06	5.58618
12	9.79434e+06	5.2032
12	9.90352e+06	5.89793
12	1.0016e+07	8.93081
12	10056712	5.30107
12	10082928	5.59209
12	10104722	5.5011
12	1.04356e+07	6.30211
12	1.11344e+07	5.50338
12	1.12349e+07	5.44723
12	1.12937e+07	6.3131
12	1.19338e+07	5.25646
12	1.19947e+07	5.04628
12	1.20468e+07	5.18332
12	1.21031e+07	8.22479
12	1.21643e+07	7.00023
12	1.21742e+07	5.14901
12	1.22136e+07	6.51394
13	305504	5.93812
13	434021	6.51265
13	456664	5.79212
13	463216	5.59603
13	524762	11.5282
13	624036	6.14693
13	653069	6.31973
13	802689	5.25773
13	2.51386e+06	5.20189
13	2.5447e+06	6.30987
13	5.54239e+06	5.89263
13	8.64317e+06	5.47852
13	9.16568e+06	7.25193
13	9.29577e+06	5.19125
13	9.3756e+06	6.51217
13	9.4573e+06	6.97533
13	9.46281e+06	6.1894
13	9.48603e+06	5.6995
13	10006073	9.6502
13	1.0037e+07	6.06363
13	1.06652e+07	7.38965
13	11274469	9.17336
13	1.13375e+07	6.43377
13	1.27059e+07	5.23138
13	1.39159e+07	5.71788
13	1.39746e+07	5.51587
13	1.45852e+07	6.36521
13	15025306	7.99653
13	15063032	5.60716
13	1.50855e+07	6.20548
13	1.50963e+07	6.02295
13	1.51746e+07	6.40886
13	1.52144e+07	5.35335
13	1.53554e+07	5.39685
13	1.53634e+07	11.7105
13	1.53745e+07	6.21541
13	1.54257e+07	7.94893
13	1.5506e+07	5.00759
13	1.71556e+07	5.00721
13	2.0836e+07	5.10464
13	2.70172e+07	6.24053
13	2.98655e+07	5.31137
13	3.00456e+07	5.06903
13	3.03634e+07	8.81443
13	30465700	5.75349
13	33205757	5.29837
13	3.3555e+07	5.50705
13	34275605	5.22055
13	3.42954e+07	7.55699
13	3.43774e+07	5.38132
13	3.43952e+07	8.0189
13	3.95242e+07	5.5623
13	39554937	5.53404
13	3.98226e+07	5.04526
13	4.19247e+07	6.21031
13	4.19545e+07	5.10407
13	4.20542e+07	7.22192
13	4.20662e+07	7.57065
13	4.20745e+07	5.9821
13	4.21041e+07	6.40619
13	42153753	6.57424
13	4.22154e+07	5.98969
13	4.2274e+07	5.35841
13	4.22935e+07	8.79961
13	4.23454e+07	10.1393
13	4.23639e+07	10.4781
13	4.23972e+07	7.02942
13	4.24037e+07	7.3717
13	4.24147e+07	6.2064
13	42426181	11.8993
13	4.24536e+07	5.92442
13	42476349	6.03417
13	42524075	6.93684
13	4.25338e+07	7.25407
13	4.25432e+07	5.52832
13	4.25631e+07	6.70685
14	1.2366e+06	5.18858
14	1.33592e+06	5.7461
14	1.34681e+06	5.34959
14	1.37453e+06	11.2342
14	1.38529e+06	5.19893
14	1.44128e+06	5.64564
14	1467232	7.42689
14	1.48325e+06	11.4723
14	1526834	8.84337
14	1.55613e+06	6.28929
14	1.59293e+06	7.46933
14	1613804	9.63384
14	1.66396e+06	8.30069
14	1.74777e+06	8.37117
14	1.77493e+06	9.44922
14	1792322	7.84022
14	1.83737e+06	6.4715
14	1.85539e+06	7.57445
14	1.88767e+06	7.07525
14	2.37251e+06	7.86267
14	2.40574e+06	8.68275
14	2.42453e+06	8.5851
14	2.47659e+06	8.27401
14	2.5662e+06	5.99913
14	2.58572e+06	5.98465
14	3.16275e+06	7.18837
14	3.92622e+06	9.24554
14	4.15593e+06	5.34434
14	4.16416e+06	7.55028
14	4.29254e+06	5.52855
14	4.37474e+06	5.94941
14	4535572	5.29709
14	5.56449e+06	5.48679
14	5.57522e+06	10.0249
14	5.6745e+06	5.92493
[truncated: 1,511 more rows]

## Sheet: B. Halter-hapQTL
Supplementary Table 3B. Significant ROI identified by hapQTL in the Halter QH subpopulation.
Chromosome Number	SNP position (bp)	Bayes Factor value
1	1091269	5.153
1	1095346	5.657
1	1095677	5.442
1	1096088	6.315
1	1096311	6.074
1	1511653	5.271
1	1512410	5.32
1	1513528	5.371
1	1514835	5.013
1	1515719	5.18
1	1516345	5.387
1	1517929	6.849
1	1520472	6.95
1	1521723	7.087
1	1522899	6.962
1	1523660	6.296
1	1524910	6.185
1	1528872	6.428
1	1529301	6.135
1	1530344	5.847
1	1530566	5.957
1	1531497	5.239
1	1533276	6.273
1	1536046	5.544
1	1969609	5.476
1	1971421	5.288
1	2331907	5.857
1	2332532	6.209
1	2334427	6.805
1	2335124	6.411
1	2335960	6.411
1	2341388	6.585
1	2794768	5.843
1	2796052	6.08
1	2797896	5.007
1	2802951	6.671
1	2804764	6.831
1	2805416	14.482
1	2805787	14.863
1	2805858	14.092
1	2807547	10.614
1	2818743	5.226
1	2827456	5.275
1	2827599	5.091
1	2831685	5.063
1	2831991	5.277
1	2832914	5.322
1	2836358	5.017
1	3124729	5.068
1	3126312	5.291
1	3144957	5.238
1	3147386	5.709
1	3149589	5.461
1	3150111	5.761
1	3154892	6.029
1	3154973	5.641
1	3155075	5.86
1	3156291	5.886
1	3156747	5.746
1	3156790	5.418
1	3160448	5.357
1	3163216	5.343
1	3174440	5.502
1	3175499	5.348
1	3176707	5.435
1	3176763	5.454
1	3179554	5.159
1	3180764	5.08
1	3190205	5.136
1	3191684	5.48
1	3194729	5.031
1	3195065	6.246
1	3196108	6.135
1	3196411	6.28
1	3196608	6.577
1	3196647	5.972
1	3201637	5.481
1	3203207	6.052
1	3203702	6.021
1	3204239	5.784
1	3209936	6.278
1	3211331	5.814
1	3211385	6.471
1	3212739	8.372
1	3216526	8.226
1	3219018	8.802
1	3219227	8.848
1	3219402	8.729
1	3223390	6.686
1	3223904	6.558
1	3226367	6.631
1	3227064	6.79
1	3227502	6.525
1	3227761	5.644
1	3228126	6.606
1	3228914	6.615
1	3230952	5.695
1	3236508	8.198
1	3236733	8.454
1	3238269	8.461
1	3240767	8.462
1	3241155	7.369
1	3241589	8.425
1	3247668	8.195
1	3248331	8.322
1	3248633	8.436
1	3250495	6.963
1	3251094	6.56
1	3253669	6.615
1	3253899	6.38
1	3254758	6.904
1	3257020	7.02
1	3259104	6.265
1	3259695	7.075
1	3261257	6.544
1	3261357	7.196
1	3266657	7.247
1	3266923	7.101
1	3267421	7.31
1	3267673	5.345
1	3288560	5.299
1	3292136	5.903
1	3293886	5.475
1	3295063	6.189
1	3295134	5.959
1	3295299	5.756
1	3301614	5.694
1	3307917	6.048
1	3310425	5.613
1	3311216	5.623
1	3311622	6.743
1	3313847	7.096
1	3314401	6.853
1	3315369	7.47
1	3315797	7.015
1	3316177	7.001
1	3319798	6.89
1	3320486	6.977
1	3322882	7.048
1	3323664	7.139
1	3323904	6.223
1	3327943	6.904
1	3331113	6.912
1	3331158	7.198
1	3331581	6.783
1	3332403	6.799
1	3333183	6.985
1	3333794	6.943
1	3334417	6.762
1	3335327	7.223
1	3336798	6.603
1	3337847	7.789
1	3341242	7.5
1	3343360	5.681
1	3395097	5.154
1	3399598	6.04
1	3400285	5.658
1	3400422	5.367
1	3409596	5.326
1	3420401	8.335
1	3420774	8.061
1	3421064	7.787
1	3422010	7.388
1	3423672	7.911
1	3425096	8.354
1	3425669	9.281
1	3426424	9.055
1	3427345	9.096
1	3427552	8.949
1	3430186	8.534
1	3430290	8.509
1	3430737	8.321
1	3430800	8.516
1	3433539	8.947
1	3437326	8.412
1	3438923	8.024
1	3439707	7.556
1	3439896	8.645
1	3440593	8.438
1	3444734	9.293
1	3445831	8.889
1	3446773	9.341
1	3447691	9.995
1	3448146	9.597
1	3469446	8.011
1	3477007	7.794
1	3479530	7.875
1	3480010	7.449
1	3483555	7.809
1	3484310	7.937
1	3485758	7.738
1	3486498	7.878
1	3488167	7.621
1	3489328	6.942
1	3490283	6.168
1	3494296	5.99
1	3494760	5.732
1	3497042	5.933
1	3500090	6.15
1	3500986	6.114
1	3502164	6.405
1	3502192	6.073
1	3502303	5.839
1	3526541	6.149
1	3531359	6.642
1	3537603	6.482
1	3538193	7.433
1	3539929	7.091
1	3540967	7.361
1	3541759	7.364
1	3542805	8.004
1	3542846	8.379
1	3547435	8.158
1	3548254	9.247
1	3548846	9.077
1	3553634	5.267
1	3555389	6.69
1	3557949	5.978
1	3558245	5.98
1	3560987	6.077
1	3561538	6.082
1	3564302	6.16
1	3564529	5.935
1	3647352	5.112
1	4336289	6.005
1	4337459	7.376
1	4338238	7.071
1	4341274	7.623
1	4346522	6.252
1	4346691	7.217
1	4346790	6.271
1	4347115	7.523
1	4347575	6.288
1	4349601	6.68
1	4349838	7.381
1	4350841	6.663
1	4353408	6.764
1	4355371	6.403
1	4360950	6.181
1	4363210	6.707
1	4365125	5.095
1	4365273	5.128
1	4370946	5.061
1	4935302	5.482
1	4935773	5.461
1	4936478	6.197
1	4937125	5.285
1	4940552	6.379
1	4944463	5.714
1	4948033	6.284
1	4951543	6.106
1	4952508	6.529
1	4952599	6.492
1	4954120	6.632
1	4954557	6.247
1	4954634	6.291
1	4954683	6.414
1	4954892	6.723
1	4955996	6.553
1	4959016	6.177
1	4959242	6.938
1	4960269	6.75
1	4960802	6.59
1	4961206	5.997
1	4961733	5.139
1	5032909	5.124
1	5037538	5.066
1	5039476	5.643
1	5044111	5.123
1	5071028	5.459
1	5071544	5.861
1	5071885	5.94
1	5072410	5.617
1	5074422	6.01
1	5074647	5.549
1	5076633	5.897
1	5076751	6.688
1	5077505	9.395
1	5078026	9.8
1	5079423	9.723
1	5080281	9.883
1	5080403	10.047
1	5082326	11.228
1	5082940	9.943
1	5085726	10.326
1	5087453	9.986
1	5087630	12.408
1	5088417	11.913
1	5088570	12.515
1	5089578	11.847
1	5090376	10.684
1	5090744	10.593
1	5096917	11.58
1	5098297	11.676
1	5103585	11.394
1	5104068	8.361
1	5106467	8.282
1	5107852	8.154
1	5108463	8.013
1	5108690	8.019
1	5109048	7.94
1	5120270	7.806
1	5121302	7.949
1	5124363	7.766
1	5124508	8.751
1	5275963	5.551
1	5276542	7.251
1	5276782	7.475
1	5281959	7.193
1	5283632	7.251
1	5285451	5.23
1	5653441	6.597
1	5653593	6.517
1	5654354	5.122
1	6062600	5.294
1	6063915	6.85
1	6064798	7.282
1	6066844	6.792
1	6066866	6.874
1	6069698	5.497
1	6070933	5.812
1	6072930	5.317
1	6073067	6
1	6075628	6.694
1	6076098	6.995
1	6078073	6.996
1	6078585	7.549
1	6079105	7.475
1	6079602	6.356
1	6083162	6.613
1	6088168	6.422
1	6089786	7.656
1	6093009	8.147
1	6093271	6.873
1	6094639	8.312
1	6094913	7.407
1	6098197	8.132
1	6098251	7.944
1	6098452	7.461
1	6098568	7.102
1	6099630	6.41
1	6100655	7.37
1	6100709	6.625
1	6101529	6.908
1	6103160	7.236
1	6103516	8.224
1	6105115	7.738
1	6105875	7.487
1	6106173	7.413
1	6106773	7.574
1	6108240	7.505
1	6108792	6.98
1	6108945	6.64
1	6110497	6.296
1	6111542	5.698
1	6128451	5.696
1	6129320	7.076
1	6129378	8.111
1	6130579	7.368
1	6132979	8.767
1	6135707	8.221
1	6135787	7.129
1	6137138	6.012
1	6138322	6.022
1	6141092	5.872
1	6141343	6.759
1	6141809	5.502
1	6148391	5.432
1	6153021	5.49
1	6153196	5.589
1	6153514	5.58
1	6154606	5.506
1	6203252	6.119
1	6205540	6.103
1	6205890	6.14
1	6205932	6.505
1	6209069	7.015
1	6210914	6.598
1	6211619	7.144
1	6218577	6.331
1	6222368	6.56
1	6222929	5.848
1	6224325	6.439
1	6225278	6.359
1	6225557	6.442
1	6225723	6.931
1	6225981	6.753
1	6227051	6.754
1	6227087	6.653
1	6227776	5.494
1	6231088	5.964
1	6235794	5.101
1	6242742	5.095
1	6243943	5.549
1	6244139	5.827
1	6245948	5.719
1	6247186	5.858
1	6247413	5.775
1	6247816	6.019
1	6248258	5.672
1	6249060	6.343
1	6249095	6.517
1	6249179	7.222
1	6249667	6.292
1	6249987	5.613
1	6250320	5.937
1	6250341	6.078
1	6252584	5.768
1	6731895	5.18
1	6732407	5.013
1	6733078	5.264
1	6739308	5.001
1	6740694	5.227
1	6742733	5.455
1	6742998	5.244
1	6743928	6.17
1	6745566	6.004
1	6752986	6.174
1	6753949	6.814
1	6755305	6.229
1	6758815	6.432
1	6759073	6.025
1	6759695	6.118
1	6765497	7.812
1	6765912	9.838
1	6766570	9.578
1	6767138	9.472
1	6767593	10.161
1	6767997	9.18
1	6768077	9.254
1	6768614	9.216
1	6768827	9.113
1	6769577	9.281
1	6770268	8.985
1	6770852	7.778
1	6773649	6.058
1	6774724	5.335
1	6775157	5.498
1	6776027	5.332
1	6776314	6.175
1	6778888	5.441
1	6789271	6.83
1	6789314	7.267
1	6789329	11.287
1	6789361	11.179
1	6790179	11.144
1	6790690	10.896
1	6791056	11.018
1	6791157	10.909
1	6793679	10.508
1	6794901	12.17
1	6798706	11.306
1	6801020	12.787
1	6805361	11.728
1	6807710	12.821
1	6808668	12.869
1	6810202	12.486
1	6810327	5.819
1	6813717	5.116
1	6813865	5.423
1	6815688	5.344
1	6821290	5.26
1	6824179	5.431
1	6833044	5.692
1	6833410	5.192
1	6833913	5.009
1	6837428	5.576
1	6839457	5.564
1	6840429	5.007
1	6840944	5.46
1	6843129	5.459
1	6843204	6.078
1	6843438	5.928
1	6843501	5.532
1	6843677	5.52
1	6845479	5.499
1	6846816	5.334
1	6847682	5.246
1	6848438	5.178
1	6849866	5.253
1	6853520	5.305
1	6853774	6.291
1	6855645	7.53
1	6855785	6.273
1	6860210	6.513
1	6860867	7.356
1	6862050	7.454
1	6863514	6.26
1	6863567	5.006
1	6888053	5.908
1	6890041	8.078
1	6891403	8.264
1	6892716	7.809
1	6893197	8.083
1	6896229	7.02
1	6897009	7.819
1	6897049	7.969
1	6897389	7.985
1	6898047	7.406
1	6899393	7.312
1	6900897	7.446
1	6901931	6.401
1	6902202	7.339
1	6902276	7.364
1	6903462	7.846
1	6904226	8.095
1	6905117	7.68
1	6906474	7.803
1	6907258	8.509
1	6908983	8.17
1	6912774	8.058
1	6913610	7.96
1	6917450	7.445
1	6920606	7.365
1	6923733	7.358
1	6924453	7.392
1	6924616	7.08
1	6929532	7.124
1	6930010	7.52
1	6931545	7.453
1	6933975	7.556
1	6934624	7.769
1	6935192	9.322
1	10113845	5.148
1	10114750	5.045
1	10143356	5.496
1	10147048	6.05
1	10148065	6.033
1	10149087	5.571
1	10154481	5.986
1	10154734	6.244
1	10157145	6.018
1	10157329	6.349
1	10159917	5.796
1	10160065	5.89
1	10161469	6.417
1	10161991	6.141
1	10167681	5.769
1	10169843	6.218
1	10171517	6.106
1	10171564	6.043
1	10172939	5.782
1	10173203	6.491
1	10175632	6.996
1	10177952	7.005
1	10178394	6.416
1	10180059	6.598
1	10182736	6.63
1	10183361	6.589
1	10183432	6.411
1	10184484	6.113
1	10187102	6.961
1	10188237	7.407
1	10188417	8.679
1	10190584	8.248
1	10191522	8.46
1	10192235	6.454
1	10193112	9.259
1	10193455	8.616
1	10198509	7.827
1	10199762	7.153
1	10202629	6.911
1	10203815	6.904
1	10317589	5.258
1	10317639	5.287
1	10317730	5.277
1	10320050	5.396
1	10321043	5.366
1	10322269	5.513
1	10324711	5.533
1	10325122	5.593
1	10325605	5.424
1	10325640	5.409
1	10325960	5.322
1	10326149	6.481
1	10326582	5.436
1	10326697	6.621
1	10328961	6.434
1	10329238	5.364
1	10330741	5.024
1	10332546	5.307
1	10361387	5.089
1	10714680	5.228
1	10719671	5.01
1	11111381	5.011
1	11122848	5.912
1	11122981	5.578
1	11123034	5.577
1	11123485	6.019
1	11124056	5.222
1	11126097	5.562
1	11127293	5.343
1	11127651	5.234
1	11129490	5.189
1	11130161	5.718
1	11130537	5.856
1	11132414	5.8
1	11132793	8.429
1	11135491	8.149
1	11136753	8.762
1	11138340	7.948
1	11142690	8.211
1	11144438	7.404
1	11144830	8.926
1	11147403	8.999
1	11149457	8.26
1	11149724	9.014
1	11150709	8.743
1	11151423	8.928
1	11154592	9.434
1	11154673	9.737
1	11157596	9.463
1	11162588	9.083
1	11165662	8.728
1	11166120	7.829
1	11166164	7.615
1	11169404	7.067
1	11169436	7.72
1	11170491	7.269
1	11171279	7.788
1	11173948	7.39
1	11173995	7.366
1	11174075	7.511
1	11176189	6.589
1	11176500	6.651
1	11178206	6.808
1	11178550	6.232
1	11178803	6.635
1	11179238	6.859
1	11179448	6.453
1	11179753	6.287
1	11180747	6.811
1	11181296	6.434
1	11185004	6.532
1	11187481	7.108
1	11187571	7.269
1	11188179	7.571
1	11188248	7.554
1	11189401	7
1	11190535	7.609
1	11191716	7.444
1	11192072	7.753
1	11193200	7.327
1	11193942	6.224
1	11195139	5.346
1	11198676	5.08
1	11431492	5.432
1	11432458	5.279
1	11436433	5.834
1	11441822	5.665
1	11443548	5.38
1	11443985	5.462
1	11444178	5.84
1	11444748	9.024
1	11445325	9.383
1	11446460	9.252
1	11447003	10.038
1	11448945	8.997
1	11451130	9.078
1	11453993	9.642
1	11454188	9.139
1	11456451	9.029
1	11457452	9.303
1	11460514	9.241
1	11461155	8.99
1	11464677	9.35
1	11465029	9.266
1	11466300	9.296
1	11468184	8.945
1	11468769	9.467
1	11469798	11.597
1	11470781	12.052
1	11471417	11.87
1	11474384	10.784
1	11476279	9.726
1	11479344	9.39
1	11479446	9.931
1	11481758	10.654
1	11481818	11.63
1	11483660	9.805
1	11484348	11.39
1	11484803	11.745
1	11485456	10.04
1	11488191	9.605
1	11492023	10.56
1	11492829	11.765
1	11492874	11.321
1	11493381	10.525
1	11493528	10.584
1	11493603	10.13
1	11495315	10.387
1	11495950	11.741
1	11497389	12.241
1	11497511	11.686
1	11498180	11.321
1	11498659	11.411
1	11499004	10.527
1	11499377	10.609
1	11505440	10.759
1	11505642	10.291
1	11506630	10.433
1	11506747	10.164
1	11507118	9.844
1	11511931	10.956
1	11513955	11.135
1	11513995	11.208
1	11514371	11.172
1	11514931	12.865
1	11515993	11.076
1	11516474	11.944
1	11516530	10.609
1	11517201	10.984
1	11517367	11.734
1	11517434	9.574
1	11520178	8.675
1	11520712	8.081
1	11521840	8.485
1	11522564	9.658
1	11522650	9.035
1	11523593	8.469
1	11525634	8.654
1	11530097	9.737
1	11535044	8.212
1	11535969	7.054
1	11537201	5.889
1	11539920	6.246
1	11541803	5.884
1	11543297	5.955
1	11545105	5.991
1	11546037	5.882
1	11546989	6.292
1	11547705	6.469
1	11547838	6.534
1	11547874	6.318
1	11548659	6.241
1	11552933	5.883
1	11552992	5.698
1	11553557	7.927
1	11555746	7.869
1	11556297	7.745
1	11557462	8.29
1	11558748	8.092
1	11560715	7.433
1	11560787	6.89
1	11564476	6.182
1	11565061	6.753
1	11565362	7.07
1	11568568	7.172
1	11568723	6.954
1	11569155	7.005
1	11570920	6.377
1	11570980	6.888
1	11574212	7.72
1	11574827	7.274
1	11576623	7.679
1	11577635	7.585
1	11578061	7.311
1	11578387	7.29
1	11579741	7.469
1	11580243	6.467
1	11580394	8.261
1	11581708	7.992
1	11581797	9.222
1	11582960	9.099
1	11583416	9.173
1	11583690	8.428
1	11584360	7.668
1	11585311	7.325
1	11589041	8.214
1	11592348	7.055
1	11595342	7.497
1	11596819	7.816
1	11597444	7.118
1	11598037	7.296
1	11601578	7.746
1	11602553	7.243
1	11602594	7.566
1	11611108	7.115
1	11612866	6.684
1	11613155	6.975
1	11614200	6.946
1	11614416	6.807
1	11614884	6.697
1	11615353	5.452
1	11617496	6.13
1	11618273	5.743
1	11618871	5.877
1	11619482	5.361
1	11622312	7.071
1	11630252	6.573
1	11631121	6.644
1	11632290	6.695
1	11632550	6.799
1	11632759	7.098
1	11633853	7.918
1	11634574	6.848
1	11634704	5.688
1	11661252	5.142
1	11664994	5.23
1	11666495	5.352
1	11667736	5.271
1	11671739	5.263
1	11672904	5.161
1	11677722	5.285
1	11680306	5.387
1	11681714	5.488
1	11681881	5.536
1	11682163	6.113
1	11682605	5.549
1	11683005	5.609
1	11684082	5.448
1	11687922	5.828
1	11688221	5.401
1	11719975	5.782
1	11720821	6.347
1	11721301	6.249
1	11723811	6.21
1	11724105	6.173
1	11724625	6.348
1	11729159	6.036
1	11733452	5.799
1	11734841	5.036
1	11752099	5.015
1	11756515	5.573
1	11760539	6.504
1	11761529	6.06
1	11761970	5.978
1	11762221	5.539
1	11762279	5.603
1	11763525	5.921
1	11764326	5.541
1	11765222	5.649
1	11849741	5.073
1	11862289	5.155
1	11863988	5.239
1	11865528	5.571
1	11865683	5.226
1	11882953	5.223
1	11883041	6.081
1	11884971	6.128
1	11888974	6.484
1	11891124	6.498
1	11893099	6.376
1	11894982	5.085
1	11897114	5.862
1	11898170	6.561
1	11898278	6.56
1	11898329	6.162
1	11898400	5.551
1	11899524	5.208
1	11921988	5.135
1	11923836	5.414
1	11938094	5.825
1	11938195	6.021
1	11939434	6
1	11941649	6.203
1	12015186	6.208
1	12017899	6.77
1	12018374	6.718
1	12021080	6.749
1	12023409	6.028
1	12030817	6.295
1	12065370	5.106
1	12067898	5.035
1	12070921	5.619
1	12071351	5.43
1	12074135	5.227
1	12076279	7.337
1	12077289	6.388
1	12078572	6.695
1	12082345	6.707
1	12083180	6.999
1	12083928	6.911
1	12084215	6.416
1	12084294	7.33
1	12086118	6.725
1	12086227	6.196
1	12086369	6.907
1	12088719	6.985
1	12092434	6.991
1	12093017	6.902
1	12094526	6.992
1	12094793	7.034
1	12104586	6.892
1	12105437	6.63
1	12105909	6.592
1	12106632	6.312
1	12108694	6.93
1	12128216	5.694
1	12130831	5.734
1	12131675	5.424
1	12133439	5.216
1	12136256	5.279
1	12137103	5.118
1	12137341	5.001
1	12138310	5.012
1	12138338	5.187
1	12138431	5.234
1	12144657	5.005
1	12146192	7.76
1	12147182	7.593
1	12148621	7.853
1	12149676	7.863
1	12150168	7.831
1	12150391	7.367
1	12150661	7.794
1	12151989	7.734
1	12153946	7.627
1	12155348	5.24
1	12155390	6.301
1	12155635	5.795
1	12158580	6.072
1	12165744	5.235
1	12172529	5.606
1	12177196	5.032
1	12179838	5.297
1	12179983	5.094
1	12184178	5.474
1	12185256	6.144
1	12186051	6.529
1	12188931	8.282
1	12190221	7.869
1	12190640	7.273
1	12190890	7.917
1	12191462	7.876
1	12191743	7.868
1	12192113	8.111
1	12192228	7.821
1	12193199	7.853
1	12193402	7.865
1	12197026	7.844
1	12197555	7.955
1	12198345	7.719
1	12199695	6.007
1	12200200	5.205
1	12222908	5.07
1	12223376	5.348
1	12225495	5.332
1	12229153	5.101
1	12232035	5.092
1	12235805	5.185
1	12237716	5.157
1	12238510	5.248
1	12246800	5.136
1	12252982	8.232
1	12253520	9.724
1	12253618	10.359
1	12257194	10.899
1	12257763	10.888
1	12257853	10.086
1	12257963	10.621
1	12258596	12.032
1	12259117	11.126
1	12259691	9.344
1	12263057	10.523
1	12263801	11.067
1	12265862	10.941
1	12267406	11.095
1	12267544	9.763
1	12270888	10.513
1	12271729	10.735
1	12271875	11.227
1	12274819	10.045
1	12274866	8.338
1	12276961	10.442
1	12278533	9.09
1	12279560	8.057
1	12279772	8.64
1	12280190	8.676
1	12281373	8.186
1	12288899	9.445
1	12289646	9.005
1	12294014	9.947
1	12294340	9.882
1	12294513	9.039
1	12296560	8.102
1	12297867	7.471
1	12299389	6.687
1	12300595	7.653
1	12301344	7.605
1	12301665	7.461
1	12303181	6.87
1	12304866	8.523
1	12305178	7.879
1	12305679	6.51
1	12308814	8.598
1	12601912	5.095
1	12601947	5.435
1	12632002	5.027
1	12633225	5.087
1	12635509	5.142
1	12648816	5.358
1	12652062	5.596
1	12654754	5.858
1	12655245	5.428
1	12658627	5.609
1	12662292	5.408
1	12663338	5.381
1	12664688	5.44
1	12664942	5.177
1	12665297	5.55
1	12666675	5.167
1	12667576	5.476
1	12725971	5.215
1	12726314	5.374
1	12731959	5.139
1	12732625	5.265
1	12736419	5.078
1	12935713	5.072
1	13262057	5.376
1	13291570	5.1
1	13293391	9.099
1	13294951	9.399
1	13296041	8.716
1	13296882	8.998
1	13297559	8.086
1	13298977	8.819
1	13301054	10.506
1	13302567	9.469
1	13302747	9.334
1	13303617	9.471
1	13303954	9.535
1	13305579	9.35
1	13307144	9.108
1	13307237	8.433
1	13307480	9.38
1	13308352	8.506
1	13311071	9.325
1	13311826	9.456
1	13313384	9.347
1	13314855	9.361
1	13315412	9.314
1	13316453	8.097
1	13321102	8.895
1	13323697	8.205
1	13328819	9.306
1	13330134	9.007
1	13333555	7.468
1	13333681	9.064
1	13334216	8.361
1	13340463	8.355
1	13340786	8.931
1	13340828	5.842
1	13340994	5.702
1	13344318	6.054
1	13345096	5.79
1	13502840	5.059
1	13502964	7.292
1	13503187	7.402
1	13504952	6.556
1	13506554	7.583
1	13506613	7.671
1	13506993	8.79
1	13508227	9.268
1	13509237	10.528
1	13510474	8.799
1	13511991	9.238
1	13513025	9.55
1	13514240	10.467
1	13514474	11.313
1	13514597	11.048
1	13515646	13.581
1	13516509	13.457
1	13517189	13.844
1	13519707	14.038
1	13521331	13.791
1	13523095	13.187
1	13523975	13.827
1	13524533	13.36
1	13525581	13.748
1	13527090	13.494
1	13532754	13.842
1	13537040	13.408
1	13539090	13.853
1	13540290	13.73
1	13542215	12.499
1	13542249	10.854
1	13542398	10.012
1	13543226	9.765
1	13645197	5.003
1	13655025	5.115
1	13656619	6.019
1	13657166	6.56
1	13658472	6.592
1	13659209	6.539
1	13662340	6.874
1	13665802	7.38
1	13666300	7.451
1	13667509	7.572
1	13667696	8.218
1	13668783	8.677
1	13671657	9.074
1	13671705	8.961
1	13672106	8.886
1	13673514	8.937
1	13675011	8.319
1	13675144	8.152
1	13675486	7.715
1	13788925	5.31
1	13790771	5.127
1	13799591	5.214
1	13802233	5.014
1	14127495	5.118
1	14184126	5.187
1	14187876	5.478
1	14216847	5.699
1	14219136	5.366
1	14221906	5.965
1	14225240	6.034
1	14228539	6.258
1	14231355	5.729
1	14233155	5.891
1	14233295	6.522
1	14233523	6.656
1	14234913	5.685
1	14235611	6.573
1	14237144	5.365
1	14237175	6.542
1	14237780	5.608
1	14239357	6.47
1	14240136	6.623
1	14240293	6.244
1	14245213	5.5
1	14246067	5.092
1	14246994	6.441
1	14247289	6.422
1	14250775	6.329
1	14251880	6.612
1	14255088	6.681
1	14255455	5.566
1	14255841	6.885
1	14259200	5.562
1	14260592	5.956
1	14260698	6.095
1	14262341	5.464
1	14336514	5.187
1	14340137	5.999
1	14341902	7.73
1	14343861	7.519
1	14345950	7.232
1	14352526	8.331
1	14352746	6.673
1	14352934	5.907
1	14355581	6.302
1	14357360	6.063
1	14359393	5.258
1	14361037	7.27
1	14362729	7.39
1	14364342	6.896
1	14365381	6.836
1	14365539	6.296
1	14365871	6.516
1	14455725	5.217
1	14458798	5.497
1	14460803	7.406
1	14460918	7.274
1	14461010	6.948
1	14461516	8.843
1	14461753	7.935
1	14463349	8.468
1	14466144	8.672
1	14466291	7.933
1	14470823	7.761
1	14473296	8.579
1	14474653	7.786
1	14474834	8.322
1	14474869	7.766
1	14475072	7.698
1	14476834	8.787
1	14477070	8.018
1	14477297	8.513
1	14478662	8.05
1	14480402	8.937
1	14483026	8.482
1	14483687	9.04
1	14485795	9.219
1	14486014	8.66
1	14490779	9.604
1	14493225	9.259
1	14493572	10.073
1	14494756	9.342
1	14495693	9.757
1	14497319	9.419
1	14500374	9.818
1	14504271	8.676
1	14505908	9.175
1	14507247	9.747
1	14507623	8.224
1	14508146	9.568
1	14509757	9.767
1	14509857	6.553
1	14510935	5.238
1	14541128	5.103
1	14541289	5.44
1	14542617	5.012
1	14613983	8.146
1	14614515	9.974
1	14615538	8.51
1	14615565	8.425
1	14616241	7.675
1	14619407	8.627
1	14620063	9.577
1	14621076	10.036
1	14625465	9.356
1	14625582	8.467
1	14627452	8.702
1	14630145	10.797
1	14630251	7.65
1	14630830	10.437
1	14636023	8.932
1	14639052	6.824
1	14671212	5.054
1	14673259	5.165
1	14673766	5.021
1	14713400	5.145
1	14714050	5.075
1	14716499	6.318
1	14719949	5.47
1	14724467	5.226
1	14725052	5.663
1	15021967	5.457
1	15024302	5.011
1	15024676	5.699
1	15026025	5.363
1	15074481	11.843
1	15074642	11.859
1	15076185	10.756
1	15077223	11.17
1	15080053	10.71
1	15083628	10.673
1	15084373	11.309
1	15087595	10.788
1	15089246	10.873
1	15095261	10.942
1	15096690	10.805
1	15099107	11.242
1	15099292	11.607
1	15100957	9.024
1	15111061	8.58
1	15111239	9.064
1	15113226	8.289
1	15113758	8.672
1	15114767	6.575
1	15115344	6.858
1	15115922	5.157
1	15116353	6.183
1	15118260	7.224
1	15118630	6.755
1	15119016	7.606
1	15120950	6.761
1	15121928	6.381
1	15122101	7.143
1	15123159	5.91
1	15124540	6.832
1	15125082	5.457
1	15297800	5.744
1	15297960	6.194
1	15298200	6.268
1	15298311	6.202
1	15305641	5.844
1	15389230	5.786
1	15389604	5.649
1	15394925	5.39
1	15402821	5.506
1	15403115	6.254
1	15405651	6.631
1	15406356	6.837
1	15406567	6.398
1	15406959	5.375
1	15407399	6.188
1	15407531	6.353
1	15408492	6.144
1	15409373	6.106
1	15409557	6.317
1	15415702	5.355
1	15417281	5.126
1	15418698	5.85
1	15419110	5.575
1	15420667	5.64
1	15420967	5.705
1	15427379	5.844
1	15429164	5.737
1	15429441	5.088
1	15429590	5.91
1	15438589	5.766
1	15438899	5.939
1	15442318	6.587
1	15442738	5.77
1	15447287	5.81
1	15450320	5.046
1	15456119	5.259
1	15456596	5.099
1	15461450	5.07
1	15619885	5.044
1	15966241	5.142
1	15968852	5.042
1	15969438	5.172
1	16053757	5.244
1	16054622	5.277
1	16056538	6.111
1	16057022	5.723
1	16059949	5.492
1	16060958	5.628
1	16061751	6.307
1	16062767	6.028
1	16063746	5.85
1	16075849	5.077
1	16078808	5.062
1	16079026	5.557
1	16080644	5.587
1	16082776	5.326
1	16083409	5.738
1	16083683	5.435
1	16089140	6.691
1	16090184	7.06
1	16091249	6.205
1	16093214	7.054
1	16094384	6.861
1	16094894	6.986
1	16095897	6.888
1	16096007	6.757
1	16096128	7.023
1	16097235	6.201
1	16098718	6.851
1	16099720	6.956
1	16100012	8.052
1	16101485	6.733
1	16102598	7.888
1	16102676	7.877
1	16102994	7.649
1	16103066	7.072
1	16103231	7.734
1	16103502	7.876
1	16105867	7.711
1	16106069	6.372
1	16106646	5.922
1	16107605	6.437
1	16107657	6.783
1	16109835	6.317
1	16110041	5.448
1	16113384	5.383
1	16116627	5.308
1	16118721	5.293
1	16127756	5.33
1	16131173	5.387
1	16133784	5.037
1	16157097	5.128
1	16171188	5.004
1	16172371	5.135
1	16182508	5.162
1	16190053	5.278
1	16213883	5.281
1	16218808	5.367
1	16219768	6.042
1	16220365	6.031
1	16221156	6.084
1	16225206	6.091
1	16227570	6.009
1	16228148	5.573
1	16230463	6.006
1	16231941	5.484
1	16238219	5.398
1	16238505	5.945
1	16240958	5.467
1	16241793	6.018
1	16245615	5.548
1	16246777	6.07
1	16247346	6.003
1	16255364	5.576
1	16255450	6.002
1	16256870	5.969
1	16260330	5.817
1	16262805	5.476
1	16263557	5.94
1	16263977	5.88
1	16264820	5.764
1	16268359	5.105
1	16268883	5.463
1	16269222	5.343
1	17031394	5.054
1	17034082	5.035
1	17308036	7.172
1	17308446	5.348
1	17544486	5.781
1	17544995	6.25
1	17547523	6.282
1	17549768	6.378
1	17551379	5.521
1	17552451	6.487
1	17556507	6.663
1	17557863	6.018
1	17558632	6.544
1	17560473	5.077
1	17561955	5.351
1	17563207	5.122
1	17565256	5.191
1	17569100	5.348
1	17572075	5.067
1	17572196	5.015
1	17572233	5.056
1	17572818	5.083
1	17579324	5.266
1	17580834	5.287
1	17581538	5.443
1	17582001	5.597
1	17583011	5.003
1	17584312	5.092
1	17584975	5.033
1	17585632	5.12
1	17589351	5.331
1	17589706	5.452
1	17589837	5.723
1	17596341	6.236
1	17597472	6.826
1	17599673	7.365
1	17601231	6.947
1	17601634	6.889
1	17605636	7.155
1	17606645	6.962
1	17607034	7.093
1	17608746	7.054
1	17608913	7.384
1	17609152	7.071
1	17610107	5.874
1	17612251	7.084
1	17612360	7.265
1	17612980	7.255
1	17614029	7.862
1	17615500	8.088
1	17616776	7.891
1	17618977	7.777
1	17619635	7.639
1	17621917	7.534
1	17622719	6.9
1	17628091	7.148
1	17634640	8.532
1	17635151	7.412
1	17636614	7.835
1	17636966	7.148
1	17638936	7.401
1	17639385	7.55
1	17641520	7.538
1	17646832	7.799
1	17647435	7.656
1	17647978	8.112
1	17648579	7.609
1	17650495	7.573
1	17650670	7.782
1	17651435	7.645
1	17651583	7.487
1	17652148	7.582
1	17653939	7.478
1	17654010	7.547
1	17654288	7.177
1	17654573	6.65
1	17654804	6.189
1	17655388	6.157
1	17656350	6.265
1	17658547	5.873
1	17659718	6.437
1	17661171	6.493
1	17663107	5.625
1	17666299	6.43
1	17666946	6.384
1	17668444	6.81
1	17670498	7.492
1	17671762	7.26
1	17673104	7.319
1	17673134	7.145
1	17675751	7.772
1	17678129	7.756
1	17679262	7.669
1	17687776	7.519
1	17688171	7.452
1	17691572	7.654
1	17692885	7.019
1	17693234	7.017
1	17696350	6.627
1	17697248	5.867
1	17700096	5.989
1	17701189	5.79
1	17701497	5.727
1	17701767	5.99
1	17702963	5.486
1	17703976	5.861
1	17708475	5.566
1	17713538	5.2
1	17716310	5.026
1	17716373	5.385
1	17716753	5.124
1	17717324	5.012
1	17718206	5.107
1	17718824	6.289
1	17724390	6.518
1	17726170	6.075
1	17727171	6.059
1	17727570	6.573
1	17727914	6.776
1	17728426	6.632
1	17729442	7.676
1	17730100	6.643
1	17731426	5.109
1	17733135	5.003
1	17862407	5.252
1	17862562	5.202
1	17865632	5.405
1	18254641	5.966
1	18262044	5.782
1	18263298	6.789
1	18263376	6.125
1	18265857	5.571
1	18267153	5.561
1	18267646	6.742
1	18268302	5.788
1	18269420	7.021
1	18270253	7.016
1	18270723	6.782
1	18270782	7.19
1	18279934	5.321
1	18517043	5.207
1	18677781	5.222
1	18753125	5.015
1	18754298	5.294
1	18754497	6.29
1	18817712	5.207
1	18818473	5.259
1	18821844	5.146
1	18823405	5.077
1	18833522	5.102
1	18836283	5.055
1	18836832	5.25
1	18838459	5.116
1	18838958	5.095
1	18839196	5.138
1	18841655	5.166
1	18844517	5.394
1	18848165	5.308
1	18850841	5.43
1	18858389	5.895
1	18860602	5.397
1	18861146	5.429
1	18864090	5.714
1	18867643	6.032
1	18869230	6.029
1	18871039	6.846
1	18873171	7.118
1	18873354	5.923
1	18873386	6.354
1	18873438	5.652
1	18873715	6.26
1	18877523	6.222
1	18878139	6.346
1	18878617	6.164
1	18878835	6.233
1	18879366	6.202
1	18880614	6.308
1	18882737	5.97
1	18883141	6.546
1	18883558	6.069
1	18885784	5.946
1	18886171	6.119
1	18889600	5.547
1	18890734	6.037
1	19447575	5.529
1	19447730	6.92
1	19449721	8.708
1	19452716	10.69
1	19452982	11.157
1	19454066	11.22
1	19455358	11.545
1	19455489	10.847
1	19456623	10.02
1	19458986	7.835
1	19460505	8.036
1	19461763	8.782
1	19464837	7.982
1	19467002	8.29
1	19469719	8.122
1	19469784	8.084
1	19472536	7.852
1	19474118	7.362
1	19474759	6.596
1	19476271	7.714
1	19476522	6.868
1	19477359	7.175
1	19477876	6.533
1	19478256	6.685
1	19480052	6.468
1	19482976	6.11
1	19483041	6.601
1	19483207	6.727
1	19484431	6.765
1	19486320	6.648
1	19486720	6.213
1	19486797	6.56
1	19489182	6.5
1	19489877	6.686
1	19491927	7.033
1	19494317	7.284
1	19494686	7.082
1	19500509	6.98
1	19500642	6.728
1	19501279	7.831
1	19502912	7.188
1	19505024	6.694
1	19506419	6.671
1	19507663	6.624
1	19510086	6.857
1	19510889	6.867
1	19511021	6.806
1	19513146	5.868
1	19573699	5.418
1	19873360	5.706
1	19876432	6.183
1	19880669	5.611
1	20106150	6.31
1	20107555	6.66
1	20108336	5.567
1	20110145	6.281
1	20111147	6.233
1	20113803	6.527
1	20116709	5.348
1	20120232	5.58
1	20123315	5.378
1	20124070	5.088
1	20131313	5.148
1	20131441	5.245
1	20133449	5.275
1	20133668	5.189
1	20135354	5.276
1	20135827	5.02
1	20138793	5.262
1	20139846	5.731
1	20144592	5.829
1	20145817	5.789
1	20351577	5.005
1	20355862	5.476
1	20847560	5.345
1	20851929	6.186
1	20852719	5.447
1	20854051	6.676
1	20855610	6.025
1	20856075	7.068
1	20857829	6.652
1	20858010	5.988
1	20862228	6.762
1	20862561	6.42
1	20863419	5.977
1	20865341	6.176
1	20866379	6.226
1	20866506	6.523
1	20868996	5.82
1	20874130	6.138
1	20875092	6.859
1	20875365	5.866
1	20876512	6.002
1	20879230	6.123
1	20879704	6.184
1	20881926	5.897
1	20882519	6.184
1	20882571	6.001
1	20884083	6.023
1	20884435	6.127
1	20884841	5.931
1	20886418	5.859
1	20892807	5.687
1	20893856	5.77
1	20894972	5.447
1	20896405	5.46
1	20897687	5.619
1	20899581	5.016
1	20901487	5.091
1	20901597	5.688
1	20901690	5.057
1	20903197	5.341
1	20913998	5.004
1	20957239	5.146
1	20959068	5.479
1	20960825	5.355
1	20963556	5.279
1	20964607	5.899
1	20965258	5.888
1	20966151	5.585
1	20966333	6.336
1	20967686	5.579
1	20969419	5.358
1	20970250	5.791
1	20970297	5.441
1	20970539	5.63
1	20977632	5.271
1	20979250	5.208
1	20998538	5.221
1	21480745	5.149
1	21484216	5.784
1	21554529	5.551
1	21557701	5.171
1	21914245	5.115
1	21918244	5.785
1	22042230	5.059
1	22059508	5.875
1	22059945	5.967
1	22061070	5.402
1	22061319	5.969
1	22066306	5.935
1	22066685	5.639
1	23015587	5.264
1	23016001	5.185
1	23016521	5.608
1	23022177	5.284
1	23024122	5.421
1	23024741	6.318
1	23027382	5.351
1	23029348	5.553
1	23030262	6.216
1	23030334	5.756
1	23030676	5.098
1	23032848	5.594
1	23033355	5.009
1	23037423	6.514
1	23038733	6.128
1	23039398	6.027
1	23040125	7.04
1	23040623	7.869
1	23041224	7.926
1	23042445	5.735
1	23043461	5.626
1	23045365	5.466
1	23045689	5.884
1	23050105	6.867
1	23051737	6.214
1	23052026	5.657
1	23052485	5.706
1	23052636	5.729
1	23052941	5.329
1	23056188	5.229
1	23058675	5.268
1	23058709	5.429
1	23059469	6.152
1	23061332	5.248
1	23143441	5.251
1	23152501	5.414
1	23158028	5.016
1	23924650	7.114
1	23924887	6.949
1	23925424	7.287
1	23926306	7.03
1	23928570	6.976
1	23929399	7.241
1	23929427	7.376
1	23929826	7.332
1	23930729	6.749
1	23933373	6.699
1	23935330	6.56
1	23936531	5.662
1	23953253	5.439
1	23954652	5.264
1	23965006	5.367
1	24038788	5.138
1	24047541	6.341
1	24047896	6.464
1	24049810	5.733
1	24050846	6.502
1	24050956	6.669
1	24051198	5.886
1	24051299	6.33
1	24051567	5.493
1	24051914	6.618
1	24053342	6.533
1	24054894	5.93
1	24057609	6.561
1	24058676	5.855
1	24059009	5.909
1	24059259	5.976
1	24063027	6.234
1	24065414	6.036
1	24065823	5.871
1	24070663	6.306
1	24074161	5.924
1	24081354	6.069
1	24082159	5.842
1	24084168	5.535
1	24084768	5.222
1	24277773	5.018
1	24389817	5.614
1	24389838	5.958
1	24390812	6.063
1	24391468	5.821
1	24393120	5.242
1	24393473	5.477
1	24484457	5.06
1	24486336	5.792
1	24491121	11.799
1	24492692	10.577
1	24494922	10.387
1	24497209	10.699
1	24498169	10.005
1	24500676	9.875
1	24501130	10.996
1	24502080	10.748
1	24506088	11.634
1	24509217	10.838
1	24509482	9.993
1	24510010	13.814
1	24513166	14.704
1	24513515	13.674
1	24513814	13.33
1	24514564	14.393
1	24515591	13.31
1	24515728	12.882
1	24518348	12.048
1	24518926	12.035
1	24519450	11.849
1	24520804	11.019
1	24521923	11.728
1	24521990	11.878
1	24522145	11.455
1	24528730	10.682
1	24529883	8.86
1	24531251	9.28
1	24531946	9.465
1	24533395	7.479
1	24533714	7.468
1	24534429	6.066
1	24536097	7.602
1	24536160	6.745
1	24541507	8.861
1	24544716	7.075
1	24545022	7.107
1	24545366	5.935
1	24545588	5.769
1	24548001	11.838
1	24550079	12.896
1	24552015	11.803
1	24552216	11.841
1	24552606	10.506
1	24553079	10.451
1	24557370	10.647
1	24558413	10.247
1	24558499	12.807
1	24558888	12.866
1	24559732	12.035
1	24560350	12.92
1	24560963	12.989
1	24561309	13.349
1	24561603	10.817
1	24562013	11.297
1	24565232	11.095
1	24566419	12.316
1	24566734	15.064
1	24567523	16.201
1	24569654	15.524
1	24572053	16.69
1	24582096	16.931
1	24582542	14.424
1	24584216	16.224
1	24584522	16.031
1	24585497	16.613
1	24586102	15.974
1	24587281	16.107
1	24587547	16.014
1	24588731	13.681
1	24588948	13.724
1	24590353	15.212
1	24591193	13.369
1	24591594	15.331
1	24591787	15.397
1	24593935	15.698
1	24594493	13.378
1	24635501	5.364
1	24635536	5.665
1	24635760	5.412
1	24638259	5.124
1	24638832	5.229
1	24638894	5.033
1	24639696	5.391
1	24651909	5.03
1	24652540	5.225
1	24653875	5.679
1	24656558	5.655
1	24657956	5.268
1	24658059	5.43
1	24661047	5.028
1	24661431	6.017
1	24661713	5.126
1	24669117	5.749
1	24670308	5.445
1	24670574	5.609
1	24678044	5.779
1	24678106	5.262
1	24678853	5.164
1	24679453	5.389
1	24680961	5.491
1	24683026	6.574
1	24683378	6.212
1	24686597	7.332
1	24688236	5.102
1	24688921	7.239
1	24691001	7.768
1	24691035	10.918
1	24691813	8.151
1	24693594	7.899
1	24693622	8.85
1	24703135	8.287
1	24705112	8.409
1	24705665	8.048
1	24706748	8.032
1	24708549	8.036
1	24708882	7.842
1	24710294	8.431
1	24713093	6.962
1	24713980	7.122
1	24714291	7.365
1	24714439	7.707
1	24716711	7.978
1	24717166	8.159
1	24717296	7.65
1	24717714	7.594
1	24721477	7.939
1	24721824	8.356
1	24723428	6.556
1	24726558	6.183
1	24728623	5.732
1	24733396	6.304
1	24735151	5.763
1	24735283	6.032
1	24736052	5.723
1	24736612	6.311
1	24737478	6.052
1	24738790	6.609
1	24739482	6.529
1	24741938	6.122
1	24745523	6.501
1	24745717	7.636
1	24747081	7.413
1	24748288	7.89
1	24753203	8.307
1	24754233	8.161
1	24754470	8.016
1	24754783	8.017
1	24756786	7.664
1	24757270	8.126
1	24758094	6.109
1	24758650	5.596
1	24758713	6.017
1	24760232	5.909
1	24761643	5.834
1	24763266	5.204
1	24763553	5.782
1	24764583	5.677
1	24821219	6.237
1	24821651	5.679
1	24822116	5.676
1	24823512	5.871
1	24823723	5.617
1	24824704	5.486
1	24826128	6.337
1	24827174	6.364
1	24827852	5.999
1	24829538	6.425
1	24830745	5.809
1	24831077	5.814
1	24833418	6.086
1	24834746	6.105
1	24835255	6.253
1	24837296	5.636
1	24837683	5.665
1	24840776	6.173
1	24841730	5.513
1	24842599	6.217
1	24852120	5.77
1	24853018	5.694
1	24853857	6.007
1	24854089	5.764
1	24854470	5.625
1	24864473	5.27
1	24864658	5.296
1	24866185	5.117
1	24875908	5.213
1	24876153	5.358
1	24888952	5.545
1	24889281	5.271
1	24892004	5.394
1	24892895	5.439
1	24893053	5.043
1	24893106	5.205
1	24894267	5.171
1	24894310	5.782
1	24896940	5.297
1	24898106	5
1	24899032	5.851
1	24899094	5.469
1	24901219	5.091
1	24957511	5.325
1	24957732	5.638
1	25033638	5.165
1	25037189	5.042
1	25041364	5.774
1	25044766	5.159
[truncated: 110,077 more rows]

## Sheet: C. Racing-hapQTL
Supplementary Table 3C. Significant ROI identified by hapQTL in the Racing QH subpopulation.
Chromosome Number	SNP position (bp)	Bayes Factor value
1	391799	7.145
1	391901	6.568
1	391946	7.272
1	394676	5.685
1	395950	6.776
1	396113	5.84
1	398902	5.305
1	1086568	5.432
1	1087319	5.674
1	1087894	5.627
1	1090322	6.055
1	1090747	5.827
1	1091269	5.427
1	1095346	6.229
1	1095677	5.427
1	1096088	6.441
1	1096311	6.666
1	1097688	5.194
1	1107460	5.148
1	1107517	5.037
1	1108552	5.452
1	1110747	5.254
1	1112542	5.97
1	1116010	5.517
1	1120562	5.087
1	1130079	5.643
1	1130233	5.783
1	1130511	5.025
1	1130824	5.198
1	1133560	5.071
1	1138903	5.203
1	1141657	5.202
1	1144046	5.278
1	1145217	5.59
1	1145820	5.71
1	1271486	5.746
1	1279047	5.12
1	1279097	5.51
1	1282789	7.284
1	1283047	5.517
1	1284389	6.428
1	1284479	6.049
1	1288338	6.115
1	1290489	6.218
1	1291509	6.4
1	1292202	7.313
1	1292473	6.861
1	1295092	7.495
1	1295913	6.213
1	1297394	7.515
1	1297564	7.287
1	1300516	7.742
1	1300936	7.697
1	1303127	6.553
1	1305338	6.863
1	1305385	6.157
1	1305832	5.131
1	1308249	7.768
1	1311320	5.125
1	1312108	5.001
1	1511653	5.051
1	1512410	5.014
1	2794768	5.594
1	2796052	6.649
1	2797896	6.23
1	2798612	5.315
1	2802951	7.866
1	2804764	8.388
1	2805416	13.366
1	2805787	13.296
1	2809269	5.356
1	2810892	5.734
1	2812915	5.548
1	3002750	5.032
1	3147386	6.721
1	3149589	6.022
1	3150111	6.517
1	3154892	6.801
1	3154973	6.299
1	3155075	6.629
1	3156291	6.676
1	3156747	6.576
1	3156790	6.24
1	3160448	6.198
1	3175499	5.101
1	3176707	6.042
1	3176763	6.406
1	3179554	6.942
1	3180764	7.171
1	3181181	6.487
1	3185798	5.243
1	3190205	5.13
1	3191684	5.511
1	3191970	5.038
1	3192027	5.345
1	3194729	5.301
1	3195065	5.619
1	3196108	5.616
1	3196411	6.011
1	3196608	6.411
1	3196647	5.265
1	3209936	5.026
1	3211385	5.067
1	3212739	6.107
1	3226367	5.045
1	3227761	5.161
1	3230952	5.055
1	3236733	5.424
1	3238269	5.433
1	3240767	5.434
1	3241155	5.481
1	3241589	5.445
1	3247668	5.314
1	3311622	5.943
1	3313847	5.656
1	3314401	5.57
1	3315369	6.049
1	3315797	5.966
1	3316177	5.972
1	3319798	5.767
1	3320486	5.848
1	3322882	5.997
1	3323664	6.063
1	3327943	5.319
1	3331113	5.362
1	3331158	5.724
1	3331581	5.395
1	3332403	5.119
1	3333183	5.737
1	3333794	5.749
1	3334417	5.609
1	3335327	6.26
1	3336798	5.285
1	3337847	6.092
1	3341242	6.356
1	3343360	5.552
1	3344491	5.119
1	3349283	5.336
1	3395097	5.46
1	3395426	5.354
1	3397966	7.197
1	3399598	8.747
1	3400285	8.308
1	3400422	8.583
1	3632476	5.403
1	3635228	5.5
1	3637136	5.159
1	3637974	5.564
1	3639113	5.741
1	3642751	5.21
1	3642902	5.116
1	4204326	5.211
1	4206059	5.346
1	4206180	7.665
1	4206498	5.966
1	4208021	7.815
1	4212456	7.311
1	4215410	5.774
1	4220181	6.127
1	4222065	6.552
1	4223232	6.786
1	4223772	6.41
1	4224785	6.686
1	4225585	7.029
1	4225779	5.062
1	4225885	7.437
1	4226751	5.653
1	4227623	7.487
1	4228450	7.32
1	4229460	5.15
1	4230167	7.412
1	4235215	7.161
1	4236027	7.253
1	4236090	7.133
1	4237344	6.21
1	4238865	6.341
1	4239663	6.581
1	4240155	6.536
1	4240684	5.144
1	4242519	6.638
1	4245157	6.583
1	4247881	6.127
1	4253077	6.47
1	4254008	6.508
1	4260021	6.444
1	4261755	6.597
1	4265114	6.735
1	4266286	5.61
1	4266851	5.131
1	4267184	6.954
1	4269086	6.277
1	4269271	6.132
1	4270369	6.062
1	4335899	6.141
1	4336289	7.317
1	4337459	7.782
1	4338238	7.324
1	4341274	7.97
1	4346522	6.324
1	4346691	7.493
1	4346790	6.343
1	4347115	7.675
1	4347575	6.41
1	4349601	6.837
1	4349838	7.626
1	4350841	7.177
1	4353408	6.917
1	4355371	6.107
1	4360950	5.968
1	4363210	6.207
1	4365125	6.27
1	4365273	6.612
1	4367146	5.171
1	4370946	5.293
1	4936478	5.002
1	4940552	5.469
1	4944463	5.132
1	4948033	6.216
1	4951543	5.695
1	4952508	5.895
1	4952599	5.815
1	4954120	5.987
1	4954557	5.977
1	4954634	6.032
1	4954683	5.963
1	4954892	5.966
1	4955996	5.839
1	4959016	6.571
1	4959242	7.428
1	4960269	7.265
1	4960802	7.19
1	4961206	6.541
1	4961733	6.607
1	4962638	6.758
1	4965165	8.169
1	4965670	7.89
1	4965893	7.944
1	4967311	8.244
1	4967799	7.931
1	4968685	7.993
1	4971934	7.958
1	4974136	7.97
1	4977507	8.16
1	4979268	7.987
1	4981283	8.104
1	4982964	7.666
1	4986930	7.272
1	4987348	7.009
1	4990476	7.221
1	4991055	6.685
1	4991606	6.793
1	4992398	6.903
1	4992960	6.525
1	4993324	6.322
1	4994379	6.292
1	4997614	5.114
1	5026356	5.255
1	5027714	5.485
1	5031039	5.287
1	5031490	5.402
1	5032909	5.314
1	5067091	7.092
1	5068853	12.209
1	5069085	12.352
1	5069241	12.274
1	5071028	13.901
1	5071544	14.145
1	5071885	14.096
1	5072410	12.788
1	5074422	14.191
1	5074647	12.867
1	5076633	11.803
1	5076751	12.94
1	5077505	14.557
1	5078026	14.434
1	5079423	14.204
1	5080281	14.188
1	5080403	14.373
1	5082326	14.411
1	5082940	12.094
1	5085726	12.608
1	5087453	12.209
1	5087630	14.579
1	5088417	13.292
1	5088570	13.711
1	5089578	12.311
1	5090376	11.056
1	5090744	10.994
1	5096917	12.424
1	5098297	12.72
1	5103585	12.629
1	5104068	13.492
1	5106467	14.146
1	5107852	13.746
1	5108463	12.62
1	5108690	13.683
1	5109048	12.392
1	5120270	12.475
1	5121302	10.897
1	5124363	11.448
1	5124508	10.682
1	5124684	8.649
1	5127030	8.413
1	5128923	8.243
1	5130686	7.319
1	5135683	6.066
1	5137103	6.938
1	5137192	7.636
1	5137406	7.671
1	5137686	6.844
1	5138096	6.308
1	5142877	5.033
1	5166418	5.023
1	5166655	5.308
1	5172337	5.047
1	5275351	5.789
1	5275930	6.482
1	5275963	7.308
1	5276542	8.584
1	5276782	8.891
1	5281959	9.003
1	5283632	8.407
1	5285451	8.14
1	5285814	7.633
1	5286449	7.324
1	5286576	6.806
1	5287635	7.006
1	5288559	6.818
1	5291646	7.028
1	5295777	7.174
1	5296076	7.228
1	5296376	7.387
1	5301114	7.306
1	5301294	7.428
1	5302167	6.893
1	5303213	7.73
1	5304490	7.505
1	5304663	7.186
1	5305469	6.08
1	5652847	5.999
1	5653441	5.625
1	6063915	5.223
1	6064798	6.767
1	6066844	6.656
1	6066866	6.742
1	6069698	6.068
1	6070933	6.186
1	6072930	6.574
1	6073067	6.768
1	6075628	7.033
1	6076098	7.076
1	6078073	7.274
1	6078585	7.495
1	6079105	7.524
1	6079602	7.077
1	6083162	7.462
1	6088168	7.55
1	6089786	8.263
1	6093009	9.058
1	6093271	8.331
1	6094639	8.719
1	6094913	8.281
1	6098197	8.5
1	6098251	8.443
1	6098452	8.231
1	6098568	8.087
1	6099630	7.73
1	6100655	8.302
1	6100709	7.609
1	6101529	7.842
1	6103160	7.638
1	6103516	7.891
1	6105115	8.249
1	6105875	8.075
1	6106173	7.683
1	6106773	7.472
1	6108240	7.439
1	6108792	7.849
1	6108945	7.631
1	6110497	7.403
1	6111542	7.52
1	6113570	6.247
1	6209069	5.213
1	6211619	5.559
1	6225278	5.057
1	6225723	6.061
1	6225981	6.117
1	6227051	6.657
1	6227087	6.548
1	6227776	6.856
1	6231088	8.055
1	6235794	7.768
1	6236395	7.754
1	6237126	7.686
1	6237467	8.296
1	6240795	8.292
1	6242009	7.601
1	6242742	8.564
1	6243406	8.342
1	6243943	8.005
1	6244139	8.603
1	6245948	8.156
1	6247186	8.638
1	6247413	8.195
1	6247816	8.849
1	6248258	7.785
1	6249060	7.984
1	6249095	5.987
1	6249179	5.579
1	6396626	5.2
1	6397217	8.057
1	6397944	7.571
1	6398988	5.228
1	6399907	5.92
1	6400229	5.494
1	6400575	5.489
1	6401781	5.017
1	6401846	5.12
1	6402860	5.105
1	6404197	5.204
1	6405304	5.257
1	6408728	5.234
1	6408763	5.4
1	6410608	5.411
1	6412114	5.116
1	6414871	5.172
1	6415332	5.055
1	6415976	5.135
1	6418692	5.293
1	6420372	5.011
1	6421713	5.235
1	6655793	5.33
1	6656645	6.426
1	6656713	6.169
1	6778888	7.118
1	6779975	8.72
1	6780821	8.187
1	6781214	8.255
1	6781731	8.553
1	6783387	7.024
1	6785117	7.191
1	6787225	7.083
1	6789271	8
1	6789314	7.992
1	6789329	8.015
1	6789361	8.113
1	6790179	8.212
1	6790690	7.648
1	6791056	8.266
1	6791157	7.917
1	6793679	7.423
1	6794901	7.929
1	6798706	7.515
1	6801020	6.554
1	6805361	6.334
1	6807710	6.362
1	6808668	6.06
1	6810202	5.465
1	6817486	5.008
1	6818017	5.007
1	6821290	5.026
1	6833044	5.235
1	6833913	5.001
1	6837428	5.469
1	6839457	5.491
1	6840429	5.172
1	6840944	5.22
1	6843129	5.033
1	6843204	5.13
1	6848438	5.395
1	6849866	5.799
1	6853520	6.039
1	6853774	5.764
1	6855645	8.093
1	6855785	7.103
1	6860210	6.647
1	6860867	7.391
1	6862050	7.65
1	6863514	6.77
1	6863567	6.415
1	6866690	6.589
1	6867869	6.191
1	6868500	7.159
1	6869703	6.855
1	6869742	6.415
1	6869842	5.891
1	6871787	5.387
1	6875560	5.023
1	6878394	5.021
1	6891403	6.018
1	6892716	5.786
1	6893197	5.869
1	6896229	5.689
1	6897009	5.939
1	6897049	6.261
1	6897389	6.301
1	6898047	6.124
1	6899393	6.229
1	6900897	6.306
1	6901931	6.022
1	6902202	6.852
1	6902276	6.994
1	6903462	6.974
1	6904226	7.12
1	6905117	7.072
1	6906474	6.943
1	6907258	6.944
1	6908983	6.836
1	6912774	6.885
1	6913610	8.007
1	6917450	8.282
1	6920606	8.032
1	6923733	8.153
1	6924453	8.039
1	6924616	7.936
1	6929532	7.997
1	6930010	8.343
1	6931545	8.017
1	6933975	7.976
1	6934624	8.22
1	6935192	8.146
1	6935327	7.814
1	6936598	7.613
1	6936916	6.988
1	6938988	6.946
1	6939181	5.165
1	9943305	5.223
1	10122472	5.083
1	10125350	5.067
1	10131126	5.068
1	10134997	5.097
1	10138260	5.086
1	10143356	5.427
1	10147048	5.047
1	10147665	5.149
1	10148065	5.36
1	10149087	5.046
1	10154481	5.447
1	10154734	5.217
1	10157145	5.191
1	10159917	5.081
1	10161469	6.012
1	10161991	5.829
1	10167681	5.453
1	10169843	6.31
1	10171517	5.849
1	10171564	5.9
1	10172939	5.885
1	10173203	6.288
1	10175632	7.046
1	10177952	6.937
1	10178394	7.117
1	10180059	7.271
1	10182736	6.493
1	10183361	6.725
1	10183432	6.767
1	10184484	7.089
1	10187102	7.047
1	10188237	6.036
1	10188417	6.527
1	10190584	6.046
1	10191522	6.151
1	10397111	5.833
1	10397311	5.662
1	10397619	5.351
1	10398180	5.499
1	10399933	5.64
1	10714527	5.008
1	10717206	5.136
1	10718972	5.045
1	10719259	5.01
1	10719671	5.219
1	10720517	5.204
1	10794129	5.01
1	10805528	5.466
1	10809741	5.719
1	10818559	5.091
1	10819365	5.263
1	10824409	5.097
1	10826124	5.14
1	10826678	6.204
1	10827002	7.478
1	10829506	8.463
1	10830455	7.436
1	10831556	7.781
1	10833339	7.208
1	10834737	6.901
1	10834780	7.608
1	10836770	7.228
1	10837704	7.336
1	10839239	8.027
1	10844143	5.183
1	10847095	5.209
1	10850285	5.308
1	10850721	5.054
1	10857326	5.277
1	10857794	5.707
1	10858040	5.705
1	10858461	5.468
1	10859513	5.252
1	10860151	6.116
1	10861617	6.159
1	10862194	5.51
1	10865109	6.092
1	10866192	6.174
1	10866636	5.792
1	10866732	5.657
1	10867826	5.96
1	10869756	5.472
1	11059227	5.254
1	11130161	5.591
1	11130537	6.795
1	11132414	6.666
1	11132793	8.327
1	11135491	8.023
1	11136753	8.624
1	11138340	7.845
1	11142690	8.177
1	11144438	7.323
1	11144830	8.892
1	11147403	8.948
1	11149457	8.146
1	11149724	8.966
1	11150709	8.623
1	11151423	8.887
1	11154592	9.073
1	11154673	8.628
1	11157596	8.949
1	11162588	9.239
1	11165662	8.959
1	11166120	8.007
1	11166164	7.667
1	11169404	7.023
1	11169436	7.726
1	11170491	7.043
1	11171279	7.425
1	11173948	6.995
1	11173995	6.914
1	11174075	7.263
1	11176189	6.288
1	11176500	6.416
1	11178206	6.512
1	11178550	6.036
1	11178803	6.213
1	11179238	6.239
1	11179448	6.046
1	11179753	5.624
1	11180747	6.159
1	11181296	5.965
1	11185004	6.047
1	11187481	6.223
1	11187571	5.977
1	11188179	6.199
1	11188248	6.17
1	11189401	5.923
1	11190535	6.394
1	11191716	6.053
1	11192072	6.363
1	11193200	6.287
1	11193942	5.469
1	11396574	5.319
1	11397968	7.986
1	11400162	8.178
1	11400334	8.094
1	11404398	7.948
1	11404984	7.929
1	11407630	7.615
1	11408328	6.978
1	11413054	7.119
1	11414583	7.103
1	11415721	7.438
1	11416309	6.995
1	11417995	6.49
1	11419826	6.555
1	11421468	6.43
1	11421894	6.67
1	11421921	6.344
1	11422393	6.643
1	11422486	6.675
1	11424106	7.203
1	11424587	7.104
1	11425357	7.719
1	11425712	7.199
1	11426034	7.262
1	11426066	7.906
1	11426099	7.704
1	11426919	7.643
1	11426969	8.409
1	11428291	8.713
1	11431492	8.869
1	11432458	9.167
1	11436433	8.407
1	11441822	9.223
1	11443548	8.915
1	11443985	9.53
1	11444178	9.502
1	11444748	8.83
1	11445325	9
1	11446460	9.648
1	11447003	9.905
1	11448945	9.114
1	11451130	9.642
1	11453993	8.441
1	11454188	9.757
1	11456451	9.84
1	11457452	9.146
1	11460514	9.107
1	11461155	9.441
1	11464677	9.42
1	11465029	9.674
1	11466300	10.065
1	11468184	9.335
1	11468769	9.644
1	11469798	10.233
1	11470781	9.047
1	11471417	9.598
1	11474384	9.067
1	11476279	8.096
1	11479344	7.222
1	11479446	8.174
1	11481758	10.048
1	11481818	11.067
1	11483660	9.185
1	11484348	11.359
1	11484803	11.355
1	11485456	10.451
1	11488191	10.288
1	11492023	10.93
1	11492829	11.332
1	11492874	11.15
1	11493381	10.119
1	11493528	10.177
1	11493603	9.943
1	11495315	10.03
1	11495950	11.336
1	11497389	11.576
1	11497511	11.421
1	11498180	10.392
1	11498659	10.738
1	11499004	10.415
1	11499377	11.663
1	11505440	11.655
1	11505642	11.265
1	11506630	11.086
1	11506747	12.179
1	11507118	10.351
1	11511931	10.992
1	11513955	11.484
1	11513995	11.573
1	11514371	11.474
1	11514931	11.399
1	11515993	11.748
1	11516474	10.95
1	11516530	10.006
1	11517201	11.027
1	11517367	11.366
1	11517434	10.503
1	11520178	10.467
1	11520712	9.388
1	11521840	10.061
1	11522564	11.078
1	11522650	10.85
1	11523593	10.036
1	11525634	10.019
1	11530097	11.004
1	11535044	9.819
1	11535969	10.814
1	11537201	9.838
1	11539920	11.008
1	11541803	11.626
1	11543297	11.615
1	11545105	9.003
1	11546037	8.824
1	11546989	10.015
1	11547705	9.949
1	11547838	9.738
1	11547874	9.398
1	11548659	9.286
1	11552933	8.215
1	11552992	7.085
1	11553557	7.56
1	11555746	7.474
1	11556297	7.425
1	11557462	8.228
1	11558748	7.852
1	11560715	7.103
1	11560787	6.964
1	11564476	6.465
1	11565061	6.41
1	11565362	6.827
1	11568568	6.892
1	11568723	6.328
1	11569155	6.475
1	11570920	6.377
1	11570980	6.465
1	11574212	7.515
1	11574827	6.958
1	11576623	7.593
1	11577635	7.632
1	11578061	6.993
1	11578387	6.882
1	11579741	6.865
1	11580243	6.093
1	11580394	7.439
1	11581708	6.668
1	11581797	7.541
1	11582960	7.502
1	11583416	7.46
1	11583690	6.442
1	11584360	6.093
1	11585311	6.319
1	11589041	6.951
1	11592348	6.102
1	11595342	6.135
1	11596819	6.761
1	11597444	6.188
1	11598037	6.042
1	11601578	6.862
1	11602553	6.055
1	11602594	6.978
1	11611108	7.153
1	11612866	6.159
1	11613155	7.195
1	11614200	6.975
1	11614416	6.871
1	11614884	7.036
1	11615353	5.367
1	11617496	6.135
1	11618273	6.126
1	11618871	6.177
1	11619482	5.724
1	11622312	7.595
1	11630252	7.024
1	11631121	6.348
1	11632290	6.383
1	11632550	6.351
1	11632759	6.54
1	11633853	6.519
1	11634574	6.609
1	11634704	5.931
1	11719975	7.548
1	11720821	9.772
1	11721301	9.097
1	11723811	9.348
1	11724105	8.931
1	11724625	8.224
1	11729159	5.828
1	11733452	5.001
1	11847470	5.697
1	11848637	6.14
1	11849741	6.138
1	11850081	5.959
1	11851087	5.616
1	11851799	5.592
1	11852019	5.701
1	11852773	5.612
1	11853681	5.622
1	11860951	5.986
1	11861971	5.535
1	11862289	5.799
1	11863988	5.796
1	11898278	5.122
1	11918175	5.891
1	11921988	5.366
1	11935815	5.061
1	11936842	5.061
1	11937928	6.434
1	11938094	6.605
1	11938195	6.781
1	11939434	6.691
1	11941649	6.785
1	11941967	5.111
1	11942533	5.017
1	11949681	5.913
1	11950274	5.589
1	11950839	5.941
1	11950861	5.711
1	11957715	5.052
1	11959487	5.002
1	11962107	5.389
1	11963875	5.137
1	11964769	5.297
1	11964875	5.544
1	11970249	5.497
1	11973330	6.197
1	11974587	5.835
1	11976773	6.258
1	11977245	5.441
1	11978220	5.771
1	11978467	5.808
1	11979006	5.804
1	11979503	5.39
1	11980928	5.539
1	11981153	5.832
1	11984127	5.769
1	11984962	6.489
1	11985100	5.93
1	11986694	6.117
1	11994801	5.975
1	11994848	5.703
1	11997250	5.845
1	11997317	5.032
1	12000817	5.94
1	12011868	9.314
1	12012047	6.122
1	12013446	5.137
1	12014718	5.129
1	12017899	5.352
1	12018374	5.266
1	12021080	5.245
1	12076279	6.191
1	12077289	5.486
1	12078572	6.132
1	12082345	6.144
1	12083180	6.274
1	12083928	5.864
1	12084215	5.48
1	12084294	5.988
1	12086118	5.339
1	12086369	5.692
1	12088719	6.285
1	12092434	6.285
1	12093017	6.139
1	12094526	6.229
1	12094793	6.177
1	12104586	6.118
1	12105437	5.394
1	12105909	5.875
1	12108694	5.619
1	12146192	5.871
1	12147182	5.475
1	12148621	5.914
1	12149676	5.861
1	12150168	5.809
1	12150661	5.743
1	12151989	5.5
1	12185256	5.399
1	12222908	5.078
1	12246800	5.357
1	12252238	5.498
1	12252982	7.297
1	12253520	8.054
1	12253618	8.339
1	12257194	8.439
1	12257763	7.873
1	12257853	6.988
1	12257963	7.585
1	12258596	8.545
1	12259117	7.981
1	12259691	6.412
1	12263057	7.542
1	12263801	8.102
1	12265862	8.103
1	12267406	8.53
1	12267544	8.121
1	12270888	8.236
1	12271729	9.776
1	12271875	10.028
1	12274819	9.869
1	12274866	9.669
1	12276961	9.376
1	12278533	8.025
1	12279560	6.188
1	12279772	6.515
1	12280190	6.422
1	12281373	5.707
1	12288899	6.027
1	12289646	5.275
1	12294014	5.622
1	12294340	5.812
1	12294513	5.708
1	12296560	5.11
1	12297867	5.671
1	12299389	5.218
1	12300595	5.707
1	12301344	5.684
1	12301665	6.033
1	12303181	5.361
1	12304866	6.414
1	12305178	5.837
1	12305679	5.091
1	12308814	7.743
1	12618105	5.111
1	12619892	5.092
1	12620450	5.056
1	12632002	5.797
1	12633225	5.942
1	12635509	5.956
1	12637791	5.793
1	12637986	5.366
1	12640769	5.685
1	12641981	5.276
1	12645007	5.351
1	12645354	5.673
1	12648816	6.168
1	12652062	6.166
1	12654754	6.456
1	12655245	5.893
1	12658627	6.398
1	12662292	6.338
1	12663338	6.263
1	12664688	6.296
1	12664942	5.916
1	12665297	6.54
1	12666675	6.017
1	12667576	6.613
1	12668718	6.15
1	12669836	6.351
1	12673297	6.136
1	12675165	5.536
1	12679263	5.393
1	12685717	5.475
1	12689008	5.634
1	12690202	5.254
1	12693203	5.027
1	12711142	5.073
1	12746336	5.09
1	12746461	5.01
1	13229572	5.073
1	13301054	5.101
1	13671705	5.021
1	13672106	5.64
1	13673514	6.017
1	13675011	5.635
1	13675144	5.701
1	13675486	5.349
1	13676529	5.915
1	13677058	5.067
1	14116942	5.361
1	14117020	5.134
1	14118616	5.95
1	14120799	5.211
1	14120990	5.068
1	14124686	5.519
1	14127495	6.134
1	14161886	5.237
1	14166678	5.989
1	14167279	6.764
1	14171055	6.457
1	14171979	7.208
1	14225240	5.11
1	14228539	5.181
1	14233295	5.096
1	14352746	6.677
1	14352934	6.139
1	14355581	6.831
1	14357360	6.785
1	14359393	7.275
1	14361037	7.428
1	14362729	6.846
1	14364342	7.191
1	14365381	7.248
1	14365539	7.347
1	14365871	7.288
1	14366031	6.528
1	14366742	6.464
1	14461516	5.042
1	14534623	7.432
1	14534999	8.333
1	14535310	8.218
1	14536189	9.285
1	14536244	9.56
1	14536977	7.927
1	14537073	8.044
1	14537301	8.694
1	14537595	8.213
1	14539657	7.118
1	14541128	8.07
1	14541289	7.682
1	14614515	6.131
1	14615538	5.563
1	14615565	5.725
1	14616241	5.1
1	14619407	5.569
1	14620063	6.074
1	14621076	6.607
1	14625465	6.718
1	14625582	5.747
1	14627452	7.108
1	14630145	7.589
1	14630251	5.286
1	14630830	6.67
1	14636023	5.566
1	14639052	5.118
1	14640742	6.095
1	14641890	6.201
1	14645833	5.818
1	14652251	5.64
1	14652469	6.148
1	14653926	6.015
1	14654002	5.925
1	14656150	6.037
1	14656193	5.487
1	14660100	5.673
1	14660297	5.297
1	14660786	5.074
1	14668073	5.062
1	14673259	5.164
1	14713400	5.255
1	14713625	5.006
1	14714050	6.673
1	14716499	8.869
1	14719949	9.642
1	14722149	8.48
1	14723944	8.543
1	14724467	8.691
1	14725052	8.524
1	14947093	5.352
1	14947300	5.453
1	14947619	5.387
1	14948143	5.48
1	14951185	5.371
1	14951925	5.385
1	14952822	5.126
1	15038196	5.059
1	15039280	5.943
1	15041248	5.487
1	15043610	6.174
1	15044233	6.278
1	15045156	5.435
1	15045384	5.297
1	15045452	5.264
1	15045673	6.029
1	15048114	5.161
1	15051994	5.847
1	15055738	5.201
1	15060954	6.63
1	15062265	5.936
1	15063167	6.625
1	15065573	5.362
1	15066106	5.337
1	15066361	5.755
1	15067594	6.385
1	15067899	6.532
1	15068425	5.763
1	15069012	5.633
1	15069850	5.623
1	15071509	5.665
1	15072473	6.031
1	15072995	6.846
1	15074481	7.855
1	15074642	8.105
1	15076185	7.001
1	15077223	6.82
1	15080053	6.91
1	15083628	6.724
1	15084373	7.502
1	15087595	7.389
1	15089246	7.414
1	15095261	7.145
1	15096690	7.53
1	15099107	7.096
1	15099292	7.818
1	15100957	7.612
1	15111061	6.822
1	15111239	7.597
1	15113226	6.39
1	15113758	6.604
1	15114767	5.677
1	15115344	5.636
1	15115922	5.676
1	15116353	6.095
1	15118260	6.187
1	15118630	6.049
1	15119016	6.963
1	15120950	7.519
1	15121928	6.873
1	15122101	6.39
1	15123159	6.723
1	15124540	8.956
1	15125082	8.219
1	15125118	8.875
1	15125716	8.907
1	15125748	8.149
1	15126065	10.158
1	15126775	9.261
1	15128047	8.645
1	15128635	10.465
1	15130771	8.501
1	15139738	9.733
1	15140527	10.173
1	15141523	9.475
1	15149795	8.967
1	15150722	9.01
1	15153930	10.372
1	15154357	10.599
1	15155668	10.125
1	15155814	10.221
1	15166335	10.724
1	15168287	9.686
1	15170305	8.468
1	15170905	8.016
1	15173465	6.958
1	15173617	6.736
1	15173889	7.97
1	15174663	6.624
1	15177564	8.14
1	15181436	8.148
1	15183505	7.588
1	15184261	7.909
1	15186854	7.598
1	15187862	7.26
1	15190216	7.955
1	15191136	7.229
1	15191377	7.438
1	15191417	7.143
1	15191567	8.467
1	15192934	9.165
1	15193132	9.486
1	15196088	9.447
1	15199006	7.912
1	15199058	8.568
1	15203007	8.686
1	15204479	9.745
1	15205944	8.358
1	15207461	9.486
1	15207663	9.569
1	15207824	9.91
1	15208235	8.478
1	15209788	8.089
1	15211809	8.5
1	15212105	9.36
1	15213457	7.87
1	15214701	8.685
1	15215571	8.502
1	15217855	10.113
1	15221073	11.2
1	15224225	9.386
1	15224735	10.127
1	15228058	10.165
1	15228466	9.561
1	15230439	8.773
1	15231193	6.201
1	15233622	5.903
1	15238114	5.903
1	15241079	5.528
1	15241214	5.031
1	15375083	5.036
1	15376396	5.284
1	15376894	5.262
1	15383174	5.56
1	15389230	5.641
1	15389604	5.665
1	15389858	5.259
1	15394925	5.183
1	15396913	5.127
1	15402767	5.713
1	15402821	6.08
1	15403115	5.31
1	15405651	5.382
1	15406567	5.241
1	15407399	5.337
1	15407531	5.57
1	15408492	5.396
1	15409373	5.423
1	15409557	5.481
1	15427379	5.129
1	15429164	5.067
1	15429590	5.316
1	15438589	5.013
1	15438899	5.202
1	15442318	5.47
1	15447287	5.229
1	15499991	5.179
1	15503475	5.512
1	15504679	5.683
1	15504736	5.703
1	15505329	5.645
1	15505573	5.497
1	15509063	5.286
1	15511459	5.081
1	15512960	5.248
1	15515375	5.752
1	15515439	5.208
1	15950186	5.91
1	15953345	5.523
1	15955452	7.673
1	15955784	7.852
1	15958737	6.273
1	15961580	6.478
1	15962074	6.499
1	15965847	5.355
1	15966241	6.516
1	15966684	5.9
1	15967547	5.901
1	15968227	5.725
1	15968434	6.288
1	15968852	6.633
1	15969438	6.629
1	16056538	5.419
1	16057022	5.044
1	16060958	5.417
1	16061751	5.252
1	16062767	5.118
1	16063746	5.222
1	16072201	5.173
1	16079026	6.625
1	16080644	6.552
1	16082776	6.531
1	16083409	6.447
1	16083683	7.832
1	16086482	6.331
1	16089140	7.16
1	16090184	7.11
1	16091249	6.044
1	16093214	6.405
1	16094384	5.829
1	16094894	6.513
1	16095897	6.584
1	16096007	7.894
1	16096128	7.901
1	16097235	5.783
1	16098718	6.918
1	16099720	6.939
1	16100012	6.73
1	16101485	5.351
1	16102598	6.372
1	16102676	6.331
1	16102994	6.312
1	16103066	5.56
1	16103231	6.27
1	16103502	6.76
1	16105867	6.43
1	16106069	5.176
1	16157097	5.142
1	16166446	5.08
1	16171188	5.333
1	16172371	5.224
1	16205023	5.898
1	16205315	5.354
1	16205669	6.274
1	16206840	5.925
1	16207193	6.596
1	16210887	6.08
1	16213883	6.877
1	16217441	5.757
1	16218808	7.03
1	16219335	5.262
1	16219768	6.452
1	16220365	6.493
1	16221156	6.609
1	16223129	5.468
1	16225206	6.725
1	16225360	5.498
1	16227570	5.897
1	16228148	5.502
1	16230463	5.912
1	16231941	5.27
1	16238219	5.475
1	16238505	6.003
1	16240958	5.577
1	16241793	5.796
1	16245615	5.383
1	16246777	5.918
1	16247346	5.859
1	16255364	5.294
1	16255450	5.803
1	16256870	5.79
1	16260330	5.581
1	16262805	5.277
1	16263557	5.671
1	16263977	5.575
1	16264820	5.521
1	16268359	5.17
1	16268883	5.477
1	16269222	5.553
1	17000601	5.061
1	17000887	5.12
1	17003926	5.092
1	17046131	5.319
1	17046174	5.774
1	17050708	6.002
1	17055246	5.895
1	17056805	5.225
1	17059203	5.435
1	17060245	5.701
1	17060337	5.264
1	17070558	5.482
1	17072657	5.584
1	17072807	5.73
1	17074441	5.851
1	17077316	5.296
1	17081592	5.741
1	17082543	5.817
1	17083385	6.347
1	17086966	5.563
1	17087625	6.814
1	17094685	6.818
1	17095803	6.152
1	17099284	7.992
1	17099604	5.439
1	17102549	7.35
1	17469324	6.053
1	17469551	6.19
1	17472304	5.007
1	17491828	5.738
1	17492070	5.068
1	17492612	6.37
1	17493761	6.733
1	17496163	7.266
1	17496300	6.142
1	17501307	7.243
1	17502044	6.058
1	17505212	6.669
1	17507635	7.182
1	17508475	8.174
1	17508776	7.627
1	17508991	6.96
1	17512219	8.196
1	17515237	7.015
1	17515343	6.81
1	17515364	6.812
1	17516439	6.709
1	17517036	6.908
1	17517999	8.029
1	17519395	7.581
1	17520149	6.808
1	17527631	7.653
1	17528157	7.305
1	17529270	6.93
1	17530671	5.288
1	17532876	5.846
1	17532949	7.519
1	17533414	6.366
1	17536293	7.578
1	17539286	7.679
1	17540170	6.563
1	17540574	7.752
1	17541118	5.918
1	17541721	5.717
1	17542524	7.322
1	17542754	6.589
1	17544486	7.455
1	17544995	7.485
1	17547523	7.472
1	17549768	7.56
1	17551379	6.478
1	17552451	7.229
1	17556507	7.698
1	17557863	7.15
1	17558632	7.922
1	17560473	5.854
1	17561044	5.162
1	17561955	6.353
1	17563207	5.799
1	17565256	5.813
1	17566398	5.856
1	17569062	6.669
1	17569100	7.054
1	17572075	5.717
1	17572196	5.309
1	17572233	5.341
1	17572818	5.112
1	17579324	5.337
1	17580834	5.536
1	17581538	5.699
1	17582001	5.797
1	17583011	6.268
1	17584312	7.006
1	17584414	7.727
1	17584975	6.792
1	17585632	8.269
1	17589351	8.411
1	17589706	8.009
1	17589837	7.928
1	17596341	6.773
1	17597472	6.625
1	17599673	8.331
1	17601231	7.6
1	17601634	6.762
1	17605636	7.455
1	17606645	6.828
1	17607034	7.458
1	17608746	7.545
1	17608913	7.555
1	17609152	7.549
1	17610107	5.701
1	17612251	7.542
1	17612360	6.932
1	17612980	6.942
1	17614029	7.84
1	17615500	8.131
1	17616776	7.778
1	17618977	7.805
1	17619635	8.159
1	17621917	7.993
1	17622719	7.992
1	17628091	8.871
1	17634640	8.669
1	17635151	8.284
1	17636614	8.494
1	17636966	8.339
1	17638936	8.896
1	17639385	8.777
1	17641520	8.655
1	17646832	7.982
1	17647435	7.804
1	17647978	7.627
1	17648579	7.261
1	17650495	7.091
1	17650670	7.827
1	17651435	7.809
1	17651583	7.096
1	17652148	7.664
1	17653939	7.585
1	17654010	7.092
1	17654288	6.972
1	17654573	7.209
1	17654804	7.418
1	17655388	7.375
1	17656350	6.879
1	17658547	6.01
1	17659718	7.218
1	17661171	6.573
1	17663107	6.286
1	17666299	7.118
1	17666946	7.152
1	17668444	7.215
1	17670498	6.88
1	17671762	7.284
1	17673104	6.741
1	17673134	7.074
1	17675751	7.423
1	17678129	7.379
1	17679262	7.389
1	17687776	7.076
1	17688171	6.549
1	17691572	6.228
1	17692885	5.376
1	17693234	5.715
1	17696350	5.924
1	17697248	5.754
1	17700096	5.7
1	17701189	5.155
1	17701497	5.187
1	17701767	5.902
1	17702963	5.541
1	17703976	5.833
1	17708475	5.681
1	17718824	5.795
1	17724390	6.687
1	17726170	6.196
1	17727171	6.287
1	17727570	6.675
1	17727914	6.808
1	17728426	6.877
1	17729442	5.975
1	17794452	5.047
1	17794599	5.048
1	17797273	5.013
1	17797384	5.197
1	17799583	5.135
1	17804868	5.08
1	17810663	5.057
1	17811095	5.099
1	17819623	5.783
1	17820841	5.717
1	17821048	5.568
1	17823363	5.651
1	17823702	5.506
1	17824026	6.126
1	18247964	5.617
1	18253678	9.113
1	18253748	7
1	18254641	8.598
1	18262044	7.677
1	18263298	8.292
1	18263376	7.506
1	18265857	7.074
1	18267153	6.812
1	18267646	8.149
1	18268302	7.434
1	18269420	8.634
1	18270253	8.7
1	18270723	8.6
1	18270782	8.489
1	18271290	5.733
1	18509653	5.603
1	18509809	5.093
1	18517043	5.392
1	18527928	5.054
1	18536216	5.066
1	18538085	5.072
1	18538447	5.033
1	18545150	5.358
1	18554719	5.383
1	18555571	5.951
1	18717084	5.316
1	18720100	5.189
1	18823405	5.158
1	18828304	5.121
1	18830316	5.043
1	18833522	5.169
1	18835784	5.169
1	18836832	5.252
1	18871039	5.301
1	18873171	5.213
1	18873715	5.288
1	19438120	8.551
1	19438840	9.307
1	19440415	9.391
1	19443525	8.971
1	19444445	9.446
1	19445502	9.104
1	19445720	9.108
1	19447575	9.099
1	19447730	9.439
1	19449721	9.28
1	19452716	8.484
1	19452982	8.694
1	19454066	8.561
1	19455358	8.844
1	19455489	9.345
1	19456623	10.019
1	19458986	9.275
1	19460505	9.573
1	19461763	10.404
1	19464837	9.771
1	19467002	9.856
1	19469719	9.77
1	19469784	9.987
1	19472536	10.002
1	19474118	9.639
1	19474759	9.102
1	19476271	9.6
1	19476522	8.247
1	19477359	8.578
1	19477876	8.141
1	19478256	8.439
1	19480052	8.225
1	19482976	8.103
1	19483041	8.413
1	19483207	8.377
1	19484431	8.153
1	19486320	7.52
1	19486720	7.044
1	19486797	7.499
1	19489182	7.447
1	19489877	7.419
1	19491927	7.432
1	19494317	7.518
1	19494686	7.478
1	19500509	7.523
1	19500642	7.4
1	19501279	8.592
1	19502912	7.841
1	19505024	7.421
1	19506419	7.172
1	19507663	6.896
1	19510086	7.559
1	19510889	7.377
1	19511021	7.38
1	19513146	7.054
1	19513357	6.236
1	19514663	6.662
1	19516911	6.161
1	19519227	5.564
1	19521580	5.199
1	19873360	5.331
1	19876432	6.157
1	19880669	5.638
1	19880994	5.855
1	19881321	5.28
1	19885098	5.096
1	19946819	5.929
1	19947129	6.452
1	19951562	6.783
1	19951875	6.631
1	20138793	5.229
1	20139846	5.424
1	20144592	5.841
1	20145817	5.743
1	20147597	5.033
1	20147991	5.165
1	20777382	5.03
1	20777960	5.101
1	20779322	5.409
1	20779915	5.452
1	20789236	5.244
1	20794236	5.871
1	20794340	5.658
1	20797410	5.496
1	20802083	5.246
1	20805819	5.758
1	20808974	5.05
1	20809529	5.559
1	20812989	5.889
1	20817015	5.859
1	20817333	5.054
1	20824322	5.116
1	20824375	5.404
1	20828846	5.499
1	20829329	5.271
1	20841001	5.273
1	20842935	5.307
1	20843185	5.318
1	20843886	5.64
1	20847560	5.649
1	20851929	5.008
1	20854051	5.933
1	20855610	5.321
1	20856075	6.163
1	20857829	6.284
1	20858010	5.468
1	20862228	6.449
1	20862561	5.661
1	20863419	5.461
1	20865341	5.661
1	20866379	5.743
1	20866506	6.368
1	20868996	5.516
1	20874130	5.722
1	20875092	6.457
1	20875365	5.572
1	20876512	5.827
1	20879230	5.736
1	20879704	6.038
1	20881926	6.144
1	20882519	6.122
1	20882571	6.128
1	20884083	6.134
1	20884435	6.121
1	20884841	6.166
1	20886418	6.069
1	20892807	5.409
1	20893856	5.507
1	20894972	5.057
1	20896405	5.171
1	20897687	5.114
1	20899581	5.082
1	20901597	5.678
1	20901690	5.198
1	20903197	5.631
1	20905283	5.338
1	20906326	5.099
1	20908194	5.145
1	20911141	5.034
1	20913107	5.108
1	20913542	5.152
1	20966333	5.128
1	20979250	5.52
1	20982026	5.175
1	20983433	5.199
1	20984414	6.023
1	20987235	6.633
1	20987593	6.789
1	20992465	6.42
1	20993285	6.03
1	20995884	6.305
1	20998538	6.601
1	21000124	5.947
1	21000610	6.145
1	21000664	5.947
1	21001846	6.223
1	21002485	6.07
1	21003297	5.009
1	21003740	5.169
1	21081174	5.051
1	21096449	5.01
1	21520593	5.473
1	21550738	5.334
1	21553727	6.313
1	21554529	5.168
1	21722173	5.038
1	21725002	5.187
1	21728628	5.747
1	21734191	5.584
1	21735049	5.567
1	21737242	6.017
1	21738267	6.093
1	21738308	5.909
1	21740615	5.474
1	21742252	5.951
1	21743317	5.995
1	21745314	5.341
1	21748438	6.171
1	21749079	6.547
1	21749515	6.072
1	21752783	5.049
1	21773204	6.194
1	21774662	6.281
1	21776228	6.379
1	21778369	6.302
1	21778620	5.736
1	21780849	5.501
1	21781918	6.165
1	21783045	5.98
1	21786499	5.78
1	21788628	5.66
1	21790402	5.069
1	21790893	5.921
1	21798912	5.971
1	21799812	6.338
1	21799976	5.71
1	21800762	5.796
1	21801004	5.562
1	21911575	5.147
1	21914245	5.074
1	23056188	5.176
1	23058675	5.431
1	23058709	5.51
1	23059469	6.431
1	23060063	5.129
1	23060115	5.23
1	23061332	6.549
1	23065203	6.281
1	23065395	6.992
1	23066972	7.162
1	23070739	6.227
1	23071442	5.84
1	23071635	5.883
1	23072963	7.529
1	23076778	5.832
1	23090512	5.416
1	23092925	5.423
1	23131335	5.071
1	23930729	6.163
1	23933373	6.715
1	23935330	6.52
1	23936531	6.317
1	23938046	6.158
1	23939405	5.964
1	23942870	6.138
1	23944083	6.207
1	23944149	6.079
1	23945556	7.362
1	23946445	7.498
1	23948618	7.421
1	23950184	6.386
1	23951384	7.36
1	23953253	8.226
1	23954652	8.052
1	23956141	8.089
1	23957645	8.078
1	23963650	6.981
1	23965006	7.89
1	23966301	6.014
1	23967384	5.483
1	23968260	5.522
1	23968598	5.943
1	23970502	5.455
1	23974860	6.119
1	23975741	5.673
1	23976700	5.183
1	23982392	6.343
1	23984405	5.691
1	23989573	5.074
1	23990955	5.053
1	23991178	6.08
1	23992405	5.12
1	24038788	5.002
1	24050956	6.934
1	24051198	5.482
1	24051299	6.073
1	24051567	5.382
1	24337447	5.347
1	24379724	5.034
1	24382492	5.074
1	24388802	5.589
1	24389817	10.124
1	24389838	12.013
1	24390812	11.992
1	24391468	11.219
1	24393120	10.39
1	24393233	8.004
1	24393473	10.71
1	24393596	8.489
1	24393782	9.151
1	24395338	10.128
1	24403727	8.948
1	24403775	8.331
1	24405080	8.286
1	24409236	8.943
1	24409816	8.507
1	24410330	8.988
1	24411414	9.137
1	24412537	8.329
1	24413831	9.069
1	24414100	8.425
1	24419996	9.068
1	24420114	9.094
1	24421908	9.135
1	24426360	9.123
1	24426758	9.182
1	24427375	9.258
1	24427934	10.52
1	24433500	8.851
1	24434253	8.172
1	24434870	10.356
1	24438174	9.139
1	24439012	9.229
1	24440171	9.204
1	24441319	7.834
1	24441450	7.934
1	24448078	6.116
1	24448129	5.343
1	24451005	6.101
1	24451250	5.853
1	24457818	5.835
1	24458368	5.15
1	24458761	5.873
1	24461259	5.303
1	24468729	5.01
1	24468972	5.035
1	24482080	10.421
1	24482145	10.335
1	24482888	9.937
1	24483198	10.352
1	24483671	10.006
1	24484457	10.864
1	24484772	10.431
1	24486336	10.742
1	24491121	10.393
1	24492692	8.966
1	24494922	8.68
1	24497209	8.76
1	24498169	8.215
1	24500676	7.916
1	24501130	8.894
1	24502080	8.843
1	24506088	9.273
1	24509217	8.222
1	24509482	5.276
1	24510010	6.38
1	24513166	6.448
1	24513515	5.564
1	24513814	5.56
1	24514564	5.603
1	24515591	5.263
1	24544716	7.427
1	24545022	10.171
1	24545366	9.42
1	24545588	8.042
1	24548001	8.139
1	24550079	8.438
1	24552015	7.801
1	24552216	7.462
1	24552606	6.581
1	24553079	6.301
1	24557370	6.932
1	24558413	6.661
1	24558499	8.007
1	24558888	8.461
1	24559732	7.478
1	24560350	8.738
1	24560963	9.238
1	24561309	9.49
1	24561603	8.521
1	24562013	9.435
1	24565232	8.376
1	24566419	10.644
1	24566734	11.194
1	24567523	13.79
1	24569654	13.91
1	24572053	16.24
1	24582096	15.618
1	24582542	12.539
1	24584216	9.899
1	24584522	5.039
1	24585497	5.396
1	24586102	5.273
1	24587281	5.379
1	24587547	5.317
1	24593935	5.082
1	24594493	6.861
1	24602601	5.156
1	24603154	5.545
1	24603565	5.259
1	24603850	5.463
1	24603964	5.465
1	24605667	5.615
1	24605918	5.533
1	24606228	5.225
1	24606873	5.379
1	24607024	5.573
1	24607113	5.621
1	24613096	5.154
1	24621378	5.125
1	24624325	5.639
1	24629908	5.269
1	24631510	5.603
1	24631611	5.866
1	24631864	5.791
1	24633109	5.828
1	24633184	7.744
1	24635032	10.143
1	24635501	12.03
1	24635536	12.044
1	24635760	11.504
1	24638031	9.327
1	24638259	10.761
1	24638832	11.414
1	24638894	11.403
1	24639696	11.091
1	24640691	10.687
1	24641427	10.373
1	24650338	9.833
1	24651532	9.144
[truncated: 114,855 more rows]

## Sheet: D. Reining-hapQTL
Supplementary Table 3D. Significant ROI identified by hapQTL in the Reining QH subpopulation.
Chromosome Number	SNP position (bp)	Bayes Factor value
1	1.30531e+07	6.89431
1	1.36852e+07	10.4619
1	1.37431e+07	5.36986
1	1.40872e+07	9.82874
1	1.91731e+07	6.68481
1	2.0896e+07	5.68883
1	3.83434e+07	5.17061
1	3.83749e+07	9.60115
1	3.84034e+07	5.26395
1	3.84265e+07	5.14692
1	3.84559e+07	7.02538
1	3.84753e+07	5.82655
1	3.85741e+07	6.32735
1	3.8594e+07	5.77401
1	38813533	6.37989
1	3.88253e+07	5.99776
1	38845616	5.60216
1	3.8854e+07	5.40053
1	3.8996e+07	5.92758
1	3.90055e+07	5.1448
1	3.96238e+07	6.07195
1	4.05055e+07	6.08702
1	4.05543e+07	7.02919
1	40586178	5.09337
1	40595033	6.17893
1	4.29366e+07	5.62662
1	42942507	5.44654
1	4.30237e+07	6.16336
1	43083547	5.31466
1	4.7263e+07	9.16539
1	4.74658e+07	8.09085
1	4.74746e+07	10.2932
1	4.75246e+07	6.83038
1	4.75457e+07	5.78238
1	4.75862e+07	5.94741
1	4.77762e+07	5.29082
1	4.77947e+07	6.1569
1	4.78072e+07	5.23235
1	4.79041e+07	5.83169
1	47933433	10.4844
1	49504245	5.15146
1	4.97357e+07	5.42804
1	5.01457e+07	6.49009
1	5.02445e+07	6.00331
1	5.02555e+07	5.71735
1	5.13774e+07	5.4035
1	5.14548e+07	7.06716
1	5.15031e+07	6.04556
1	5.15937e+07	6.248
1	5.45464e+07	5.67611
1	6.59074e+07	5.97383
1	7.01545e+07	5.86145
1	7.16159e+07	5.88529
1	7.16252e+07	5.67605
1	7.85069e+07	5.36361
1	7.86256e+07	5.91771
1	7.86452e+07	5.84025
1	7.86761e+07	5.63627
1	7.87339e+07	6.48458
1	78794851	7.99907
1	7.88037e+07	5.90424
1	7.90257e+07	5.80696
1	7.93054e+07	5.53879
1	7.93262e+07	6.84224
1	79333723	6.31565
1	7.97878e+07	6.22695
1	8.04829e+07	5.3326
1	8.05342e+07	5.44817
1	8.06841e+07	5.98215
1	8.2964e+07	7.25152
1	84704150	5.36182
1	8.71647e+07	5.52288
1	9.18721e+07	6.92086
1	9.2427e+07	5.2363
1	9.31039e+07	5.88805
1	93236092	6.53678
1	9.32544e+07	6.25758
1	1.05406e+08	5.94917
1	1.08855e+08	5.26579
1	1.09164e+08	5.50123
1	1.09235e+08	5.03742
1	1.10476e+08	5.14893
1	1.10587e+08	5.41361
1	1.15498e+08	6.5216
1	1.18836e+08	6.05723
1	128823968	5.10491
1	1.29906e+08	5.10316
1	1.31285e+08	5.38478
1	1.31545e+08	6.72083
1	1.58677e+08	5.10085
1	160064464	6.01698
1	1.60546e+08	9.01887
1	1.60637e+08	5.22792
1	160645728	5.77381
1	1.60855e+08	6.31056
1	1.60925e+08	7.35738
1	1.61296e+08	8.47313
1	1.61315e+08	5.9025
1	1.61325e+08	5.15956
1	161355420	7.3143
1	161366765	9.49713
1	1.61374e+08	9.8735
1	1.61406e+08	8.45916
1	161415345	7.56642
1	161426121	5.66102
1	1.61434e+08	13.047
1	1.61527e+08	5.03798
1	1.61556e+08	5.56828
1	1.61561e+08	5.01681
1	1.61693e+08	5.16107
1	1.61707e+08	15.2256
1	1.61716e+08	12.9827
1	1.61906e+08	5.46518
1	1.62007e+08	7.58289
1	1.62025e+08	12.3815
1	162054791	6.22797
1	1.62124e+08	6.68276
1	1.63345e+08	6.19212
1	1.63977e+08	6.41185
1	1.63996e+08	5.95185
1	1.65164e+08	5.36885
1	1.73005e+08	6.03502
1	1.73293e+08	6.81177
1	173793281	5.94535
1	1.73865e+08	7.25472
1	1.74125e+08	5.47424
1	1.75265e+08	7.67521
1	1.75289e+08	7.98686
1	1.75295e+08	5.28752
1	1.75525e+08	6.44074
1	1.76366e+08	5.09502
1	176394818	8.84376
1	1.76434e+08	5.07968
1	1.77566e+08	5.98642
1	177626928	5.59163
1	1.78073e+08	7.26359
1	1.78085e+08	7.26558
1	1.78094e+08	7.8544
1	1.78137e+08	8.27962
1	1.78163e+08	6.67746
1	1.79203e+08	6.07726
1	1.79504e+08	5.09763
1	1.80524e+08	6.4764
1	1.80737e+08	5.33229
2	3.91386e+06	7.55556
2	4.64457e+06	7.23083
2	1.06836e+07	5.71966
2	10806727	5.35001
2	1.98155e+07	5.56405
2	2.57745e+07	5.07124
2	2.60951e+07	5.11825
2	2.62653e+07	5.03896
2	2.7515e+07	8.78966
2	27524892	5.62072
2	27626898	6.87082
2	2.76759e+07	5.30927
2	2.7857e+07	5.2617
2	2.7865e+07	7.24687
2	2.79037e+07	5.0332
2	2.79938e+07	5.72368
2	28024011	8.36317
2	2.81123e+07	11.3308
2	28156760	5.63077
2	2.81834e+07	7.95905
2	2.82253e+07	6.70892
2	2.82343e+07	5.07755
2	28242317	5.38023
2	2.82567e+07	6.95667
2	2.82769e+07	9.14942
2	28284912	7.16998
2	28297356	6.12118
2	2.83045e+07	9.31951
2	2.8315e+07	6.89048
2	28324985	7.69021
2	2.83369e+07	5.42854
2	2.8362e+07	7.09104
2	2.83848e+07	7.90459
2	2.83937e+07	5.72296
2	2.84053e+07	7.1483
2	2.85546e+07	6.34543
2	2.85658e+07	7.27827
2	2.85743e+07	5.74337
2	2.87549e+07	7.45908
2	2.9495e+07	5.12259
2	2.95158e+07	5.58177
2	3.06914e+07	5.80454
2	3.10753e+07	7.15069
2	3.24943e+07	5.04466
2	32511124	6.48304
2	32644778	8.53942
2	3.26921e+07	5.18923
2	3.27036e+07	5.22462
2	3.27147e+07	5.46443
2	3.54051e+07	5.13891
2	37526944	7.08681
2	3.75452e+07	5.7631
2	4.47744e+07	6.08209
2	4.97148e+07	5.14726
2	50504231	10.273
2	5.08062e+07	7.42814
2	5.08145e+07	5.4679
2	5.08363e+07	7.32504
2	5.52647e+07	5.68647
2	5.60536e+07	5.65463
2	5.68725e+07	6.14414
2	5.9795e+07	5.5545
2	61025299	8.58678
2	7.3997e+07	5.26451
2	7.40335e+07	5.14
2	74175482	6.10751
2	74255646	6.35891
2	7.43145e+07	6.53651
2	7.43237e+07	5.62737
2	7.43466e+07	7.95064
2	7.43847e+07	5.1829
2	7.44053e+07	6.39109
2	7.44169e+07	7.77182
2	7.44229e+07	9.53469
2	9.33443e+07	5.18181
2	9.34163e+07	6.39548
2	9.3515e+07	6.32718
2	9.36847e+07	5.8625
2	9.37264e+07	8.51971
2	9.37753e+07	5.09839
2	9.38441e+07	9.87635
2	9.38755e+07	8.66885
2	9.39047e+07	6.61169
2	94014354	5.09964
2	9.40458e+07	5.29887
2	94234829	5.29857
2	9.52031e+07	5.56255
2	9.52533e+07	6.54216
2	9.53363e+07	5.41779
2	9.54859e+07	5.5571
2	95493233	7.60757
2	9.55772e+07	8.36111
2	9.57772e+07	6.86267
2	9.59257e+07	5.12557
2	9.5963e+07	7.19738
2	9.62674e+07	5.00394
2	9.64254e+07	6.87856
2	9.71942e+07	5.02277
2	9.85144e+07	5.92582
2	9.85667e+07	5.10879
2	9.90055e+07	5.23094
2	9.95969e+07	5.39061
2	9.98456e+07	6.05832
2	99854094	8.22776
2	1.00005e+08	5.02761
2	1.00024e+08	6.47659
2	1.00696e+08	6.283
2	1.00955e+08	5.45478
2	1.01007e+08	5.3738
2	101035143	11.7646
2	1.01045e+08	6.47605
2	1.04605e+08	7.85858
2	104613195	5.65563
2	1.07564e+08	6.3405
2	107664223	7.15979
2	107686976	7.49986
2	1.07696e+08	6.25888
2	1.07715e+08	8.62687
2	1.07745e+08	6.81978
2	1.08147e+08	7.45544
2	111934297	5.12613
2	1.18015e+08	5.81431
2	1.18035e+08	5.14857
2	1.18255e+08	5.53243
2	118623235	9.65152
2	1.18715e+08	9.49586
2	1.19196e+08	6.59261
2	119245797	5.58525
2	119256950	6.34852
2	1.19296e+08	5.49238
2	119355753	7.65527
2	1.19374e+08	5.70684
2	1.19437e+08	5.98807
2	1.19466e+08	5.87701
3	25445764	5.85637
3	2.56362e+07	5.10413
3	2.65564e+07	5.43603
3	28486011	6.48982
3	3.18745e+07	6.25972
3	3.93232e+07	6.16971
3	3.98563e+07	5.06144
3	3.99063e+07	5.30436
3	4.10244e+07	5.00323
3	4.13564e+07	5.16763
3	4.24152e+07	6.69093
3	4.32956e+07	5.94883
3	4.33845e+07	6.90756
3	4.34066e+07	6.27986
3	4.3486e+07	5.00684
3	4.36327e+07	6.59668
3	4.36745e+07	5.81462
3	43733535	6.78415
3	4.37651e+07	5.08024
3	43807694	7.01864
3	43825599	7.20916
3	4.38343e+07	8.4208
3	4.38443e+07	5.0337
3	4.3878e+07	5.38358
3	4.39733e+07	6.509
3	4.39846e+07	5.4994
3	4.40445e+07	8.75278
3	4.40752e+07	6.15114
3	4.4086e+07	5.62402
3	4.4096e+07	8.05451
3	4.41162e+07	5.65137
3	4.44549e+07	5.2847
3	4.45268e+07	5.40355
3	4.45346e+07	7.9413
3	44545184	7.6613
3	44584644	9.52208
3	44626911	5.83857
3	44662720	5.1883
3	5.02861e+07	8.73819
3	5.03557e+07	11.5252
3	50367040	7.75394
3	5.06244e+07	5.28822
3	5.11658e+07	5.0944
3	5.12774e+07	5.72479
3	5.14272e+07	5.71835
3	5.33343e+07	5.47044
3	5.37836e+07	5.31923
3	5.42427e+07	5.20721
3	5.79246e+07	6.34716
3	5.8013e+07	6.64476
3	5.81646e+07	6.49531
3	5.8204e+07	5.71967
3	5.82352e+07	8.91158
3	6.3233e+07	5.33456
3	6.47036e+07	5.57047
3	6.48245e+07	6.3524
3	6.49045e+07	5.27412
3	6.81859e+07	5.23993
3	6.82242e+07	5.18492
3	6.83543e+07	5.60434
3	6.84235e+07	5.51414
3	6.84451e+07	9.2682
3	6.85151e+07	6.51887
3	7.33343e+07	7.13686
3	7.3463e+07	6.6098
3	73745775	5.37877
3	7.57444e+07	7.26052
3	8.25557e+07	5.01167
3	8.26149e+07	5.78001
3	8.6072e+07	5.12502
3	86116234	6.97592
3	8.61244e+07	5.21177
3	86145621	5.36699
3	8.61552e+07	6.53073
3	104821147	5.47761
3	1.05296e+08	6.71052
3	1.05927e+08	5.30654
4	283656	9.63302
4	954982	6.2126
4	994708	6.77328
4	1.00284e+06	5.29372
4	1.05529e+06	5.03713
4	1244925	5.49802
4	5.30524e+06	6.91571
4	5.31396e+06	6.16175
4	5.70641e+06	5.83575
4	5844835	6.12375
4	6596280	7.09667
4	6.64761e+06	8.76895
4	6877083	7.1078
4	6.99542e+06	7.31478
4	7.57409e+06	6.16125
4	7.58465e+06	7.92404
4	8.31511e+06	5.0416
4	8.32289e+06	9.76572
4	8.44275e+06	10.7206
4	1.03058e+07	5.10222
4	1.25428e+07	5.94615
4	1.25659e+07	5.78811
4	1.26361e+07	5.29149
4	1.30932e+07	5.81791
4	13563072	7.03519
4	1.43948e+07	6.03844
4	1.4401e+07	9.7567
4	1.44348e+07	6.55741
4	1.61744e+07	5.4862
4	1.6235e+07	9.04733
4	1.62643e+07	6.99435
4	1.62769e+07	8.76567
4	1.6288e+07	10.1609
4	1.6295e+07	12.4126
4	16304130	11.5974
4	1.63358e+07	9.44601
4	16376236	10.221
4	1.63979e+07	5.19912
4	1.64151e+07	5.8049
4	1.64243e+07	8.53535
4	1.64354e+07	10.479
4	1.6452e+07	7.82931
4	1.64976e+07	10.463
4	1.65132e+07	10.043
4	1.65238e+07	8.15107
4	16547093	5.3021
4	1.6664e+07	5.30562
4	1.67265e+07	6.697
4	1.67338e+07	5.16186
4	1.67546e+07	6.65024
4	16836471	6.24724
4	1.68648e+07	5.5022
4	1.79232e+07	6.89242
4	1.81264e+07	5.09846
4	1.81565e+07	7.38258
4	1.83766e+07	9.7387
4	1.84549e+07	5.65591
4	1.84756e+07	6.96263
4	1.8506e+07	5.12439
4	1.85329e+07	5.92127
4	1.86157e+07	5.73849
4	1.9016e+07	5.88438
4	1.90758e+07	7.27736
4	1.91843e+07	5.56646
4	19335729	6.60744
4	1.93545e+07	5.07252
4	1.94757e+07	8.42936
4	1.9774e+07	5.05441
4	1.98252e+07	7.23764
4	1.98527e+07	5.41677
4	1.99218e+07	5.55368
4	2.30677e+07	5.45241
4	2.31237e+07	6.14209
4	23187038	6.11254
4	2.34142e+07	5.33939
4	2.53158e+07	6.14728
4	26035100	5.49729
4	26184696	5.38114
4	26822913	5.01456
4	2.69338e+07	6.81565
4	27507618	6.29601
4	27553734	5.78308
4	27652841	7.46812
4	2.83566e+07	5.2242
4	2.88846e+07	5.19841
4	3.05049e+07	5.16884
4	3.06615e+07	5.26218
4	3.07462e+07	5.97002
4	3.09455e+07	5.125
4	3.10855e+07	11.8475
4	3.12749e+07	5.62185
4	3.28636e+07	5.60489
4	3.43157e+07	5.56166
4	35125962	5.23946
4	3.52167e+07	10.5504
4	3.52242e+07	5.04991
4	3.52857e+07	12.6979
4	35323618	6.72874
4	3.53462e+07	5.26496
4	3.53846e+07	5.87689
4	35447008	12.3048
4	35504549	5.73084
4	3.55157e+07	6.57513
4	3.55249e+07	10.1055
4	3.55465e+07	7.48934
4	3.55545e+07	5.82901
4	3.56166e+07	5.50544
4	3.56278e+07	5.63581
4	3.58735e+07	5.15711
4	3.62441e+07	5.2512
4	3.64656e+07	6.54104
4	3.64836e+07	5.46769
4	3.66356e+07	6.10488
4	38526174	5.64999
4	3.90844e+07	6.64283
4	3.91359e+07	5.4862
4	3.91442e+07	7.74589
4	3.92468e+07	6.13525
4	42915793	5.51555
4	4.41338e+07	5.32164
4	5.77155e+07	5.04058
4	5.8107e+07	5.45619
4	5.81248e+07	5.61447
4	5.81557e+07	5.81317
4	5.81635e+07	6.16569
4	5.83471e+07	6.13562
4	5.84041e+07	5.31365
4	5.84167e+07	5.69618
4	5.84261e+07	5.42472
4	58445959	5.85936
4	5.84533e+07	5.01762
4	6.0754e+07	5.02828
4	6.85625e+07	7.38058
4	6.86033e+07	6.36782
4	68733392	5.33124
4	6.97251e+07	5.08722
4	8.26868e+07	5.43862
4	83366018	8.30767
4	9.56231e+07	5.0314
4	96657915	5.01798
4	9.7566e+07	6.22413
4	9.76248e+07	5.87376
4	9.91865e+07	5.10647
4	9.92045e+07	5.06295
4	100917252	5.13863
4	1.01875e+08	7.87916
4	1.03335e+08	5.56534
4	103414240	8.0344
4	104355111	6.88063
4	1.05615e+08	5.01598
4	1.05813e+08	5.33558
4	1.06688e+08	5.77978
4	1.06726e+08	5.35433
4	106747371	9.82681
4	1.06755e+08	7.40913
4	1.06775e+08	7.50925
4	1.07375e+08	5.41665
4	1.07995e+08	5.5218
4	1.08035e+08	7.37499
4	1.08066e+08	6.18571
4	1.08164e+08	8.0606
4	1.08255e+08	5.52209
4	108275846	6.12739
4	1.08284e+08	6.48301
4	1.08387e+08	6.85113
4	1.08486e+08	7.1955
5	955200	6.59605
5	1.10528e+06	5.47169
5	1.58565e+06	7.91626
5	2373520	5.12811
5	3.98397e+06	5.104
5	4.28675e+06	5.17394
5	4296574	9.0555
5	4.3742e+06	6.7552
5	5.49438e+06	6.03961
5	5.58106e+06	5.01266
5	5.71494e+06	7.65006
5	8.38591e+06	7.84458
5	8.91429e+06	5.44692
5	1.70921e+07	5.32919
5	1.71254e+07	5.55683
5	1.71457e+07	6.66508
5	1.71545e+07	6.14252
5	1.71643e+07	7.71066
5	2.99962e+07	5.17105
5	3.76262e+07	6.09764
5	4.01427e+07	7.0189
5	4.04443e+07	5.40829
5	4.07032e+07	5.13224
5	4.70825e+07	5.68386
5	4.72841e+07	5.64667
5	4.80765e+07	5.94085
5	6.55171e+07	9.66222
5	69252705	5.24195
5	7.15822e+07	6.32072
5	7.15958e+07	5.09697
5	7.16134e+07	6.76128
5	7.16443e+07	9.69815
5	72335620	6.07353
5	7.45848e+07	7.52412
5	7.46855e+07	5.38904
5	7.47751e+07	5.1882
5	7.51333e+07	7.98768
5	7.51434e+07	8.38417
5	75155992	5.55728
5	75163234	6.19232
5	9.19465e+07	5.86634
5	92697190	5.41214
5	99104383	5.5078
6	6.74339e+06	5.27998
6	11824264	5.99719
6	1.43533e+07	5.04249
6	1.43773e+07	5.25637
6	14393552	5.72412
6	1.46858e+07	5.20551
6	1.48122e+07	5.34994
6	1.48343e+07	7.2442
6	1.4925e+07	7.22043
6	1.62943e+07	7.16392
6	16303397	7.92323
6	2.1484e+07	6.39046
6	2.18333e+07	6.47771
6	2.2696e+07	5.75826
6	2.45958e+07	7.3483
6	2.52065e+07	8.3598
6	2.52254e+07	6.7042
6	2.52751e+07	5.18742
6	2.52844e+07	6.14515
6	25306323	6.82916
6	2.53133e+07	8.21733
6	2.53243e+07	5.43473
6	2.53345e+07	8.23162
6	2.53747e+07	7.77097
6	2.53948e+07	9.57811
6	2.54158e+07	5.49474
6	2.54232e+07	8.71299
6	2.5477e+07	6.22587
6	25496334	11.2276
6	2.55256e+07	10.2104
6	2.55358e+07	9.3325
6	2.55445e+07	9.18186
6	2.5605e+07	6.39101
6	2.56373e+07	5.31244
6	2.56451e+07	6.30719
6	2.56561e+07	5.13377
6	2.5715e+07	8.76948
6	2.57424e+07	5.10106
6	2.58955e+07	5.13078
6	2.59071e+07	5.17016
6	2.59237e+07	6.37889
6	2.59366e+07	9.78066
6	25966438	5.49772
6	2.60446e+07	5.83291
6	2.60725e+07	5.83143
6	2.61467e+07	15.6741
6	2.61647e+07	5.3494
6	2.61836e+07	9.12952
6	26267363	8.31872
6	2.63061e+07	9.02837
6	2.63745e+07	10.6315
6	2.6407e+07	6.15852
6	2.64357e+07	6.62422
6	2.64535e+07	5.36217
6	2.64762e+07	6.57767
6	26485371	8.41042
6	2.64947e+07	8.41755
6	2.65067e+07	10.6254
6	2.65147e+07	8.8486
6	2.65556e+07	13.2325
6	2.65665e+07	13.2542
6	2.65858e+07	8.52044
6	2.65942e+07	9.07478
6	2.66056e+07	6.64567
6	2.66138e+07	14.906
6	2.66251e+07	13.2584
6	26654906	15.5683
6	2.66748e+07	14.8206
6	2.66844e+07	8.0065
6	2.66953e+07	5.13869
6	2.67045e+07	10.1138
6	2.67245e+07	5.81583
6	2.67334e+07	7.97389
6	2.67547e+07	9.45293
6	2.67642e+07	8.90738
6	26777667	11.2467
6	2.67876e+07	13.8919
6	2.67931e+07	7.38427
6	2.68149e+07	6.10051
6	2.68249e+07	6.40225
6	2.68449e+07	12.8494
6	2.68534e+07	9.74397
6	2.68635e+07	9.0759
6	2.68753e+07	10.775
6	2.69052e+07	9.31551
6	2.69132e+07	15.0142
6	2.69269e+07	12.6631
6	26966459	9.08552
6	2.69939e+07	9.45587
6	27004838	7.2286
6	2.70252e+07	7.39286
6	2.70442e+07	13.6556
6	2.81162e+07	5.23528
6	2.85559e+07	6.0674
6	2.85656e+07	7.4011
6	29025569	7.70481
6	29722598	5.1644
6	2.9786e+07	7.05764
6	2.99669e+07	5.65839
6	3.00063e+07	7.57147
6	3.00152e+07	7.13478
6	3.00359e+07	6.32528
6	30062739	6.01432
6	30104870	6.62719
6	3.01351e+07	6.63185
6	3.02855e+07	7.12144
6	3.04336e+07	5.80446
6	3.04471e+07	5.51609
6	3.04835e+07	11.3204
6	3.05045e+07	13.8709
6	3.0515e+07	10.5012
6	3.05264e+07	15.8025
6	30572926	10.3398
6	3.05864e+07	9.3879
6	3.05951e+07	9.83724
6	3.06236e+07	9.56257
6	3.06536e+07	7.74694
6	3.06736e+07	10.0659
6	3.06865e+07	14.0021
6	3.06948e+07	12.2526
6	3.07056e+07	15.6985
6	3.07244e+07	18.6586
6	3.07366e+07	9.39366
6	3.07453e+07	10.496
6	3.07536e+07	17.8261
6	30763833	5.58375
6	3.07742e+07	5.06878
6	3.07958e+07	10.2944
6	3.08047e+07	7.25223
6	3.08345e+07	6.96273
6	3.08655e+07	6.95339
6	3.09545e+07	6.07019
6	3.09738e+07	6.91079
6	3.10241e+07	6.97691
6	3.10337e+07	11.9504
6	3.10443e+07	9.6713
6	3.10547e+07	8.45061
6	3.10653e+07	8.06351
6	3.10868e+07	15.8382
6	3.11955e+07	8.69196
6	3.12057e+07	5.94262
6	3.12335e+07	5.57354
6	3.12566e+07	6.12065
6	3.12842e+07	17.2718
6	3.13157e+07	7.33907
6	3.1325e+07	8.04347
6	3.13346e+07	14.7553
6	3.1344e+07	10.2626
6	31356312	5.82139
6	3.13638e+07	7.33212
6	3.13939e+07	10.3926
6	3.14452e+07	9.72086
6	3.14654e+07	6.46943
6	3.14755e+07	7.53764
6	3.14947e+07	10.7665
6	3.15171e+07	7.92873
6	3.15254e+07	6.19606
6	3.15659e+07	7.43938
6	3.21163e+07	7.49325
6	3.24257e+07	9.16208
6	3.24651e+07	9.9851
6	3.2476e+07	6.79615
6	3.25554e+07	7.00593
6	3.27541e+07	7.63624
6	3.27948e+07	5.0515
6	3.28272e+07	9.52517
6	3.2836e+07	6.58154
6	3.29247e+07	8.15155
6	3.29332e+07	6.11557
6	3.29535e+07	8.67687
6	3.29755e+07	5.89393
6	3.29857e+07	6.19526
6	3.30633e+07	5.63465
6	33073971	7.0074
6	3.30947e+07	5.07289
6	3.31036e+07	7.33211
6	3.31269e+07	5.66338
6	3.31344e+07	5.88578
6	3.31563e+07	6.23498
6	3.31642e+07	7.16876
6	3.3176e+07	6.95317
6	3.33374e+07	5.60302
6	3.34462e+07	7.07647
6	3.36876e+07	5.22853
6	33715573	5.79117
6	3.39137e+07	5.88394
6	3.65949e+07	5.00229
6	3.68936e+07	5.9087
6	3.89454e+07	6.58084
6	4.0227e+07	6.45597
6	4.02573e+07	6.79212
6	4.03957e+07	5.69981
6	4.0745e+07	5.0766
6	4.08448e+07	8.27746
6	4.08851e+07	6.18885
6	4.08942e+07	7.387
6	4.09069e+07	5.88328
6	4.09553e+07	8.22707
6	4.28836e+07	5.5308
6	4.29359e+07	5.24055
6	4.32868e+07	6.33781
6	4.3386e+07	6.22167
6	43403949	6.57706
6	4.36743e+07	5.08702
6	4.36868e+07	8.62356
6	4.40041e+07	6.61768
6	4.40137e+07	5.29808
6	44104802	7.89448
6	44116078	5.17075
6	4.44447e+07	7.30305
6	4.53045e+07	5.06773
6	4.53855e+07	6.0472
6	45574371	5.10631
6	4.57356e+07	5.68785
6	60215154	5.94872
6	6.04255e+07	5.39555
6	7.37864e+07	5.72683
6	8.13452e+07	7.08514
6	8.13642e+07	8.76419
6	8.1475e+07	12.1164
6	8.14951e+07	7.30993
6	81525212	5.08197
6	8.15345e+07	16.0601
6	8.16449e+07	8.44412
6	8.19853e+07	6.26232
6	8.19936e+07	6.2512
6	8.20522e+07	5.44709
6	82125063	5.78781
6	83545910	6.60436
7	185803	5.24769
7	2.81629e+06	5.43641
7	3.01347e+06	6.661
7	1.69708e+07	5.48905
7	18762881	6.09036
7	18785746	9.96529
7	1.87938e+07	8.18775
7	1.88238e+07	5.23407
7	18834530	9.61139
7	1.88563e+07	8.64471
7	1.89846e+07	5.77765
7	18994684	5.23881
7	1.90751e+07	6.11436
7	1.91456e+07	5.36543
7	19165035	5.39921
7	1.91734e+07	7.8176
7	1.92273e+07	8.62015
7	1.93237e+07	8.7892
7	1.93432e+07	7.35203
7	1.94284e+07	14.3404
7	1.94647e+07	11.9468
7	19554933	5.07205
7	1.95734e+07	14.6957
7	1.95841e+07	6.6298
7	1.95958e+07	7.32013
7	2.06869e+07	5.73521
7	2.07238e+07	5.57884
7	2.11635e+07	5.03251
7	2.20849e+07	6.10804
7	2.21136e+07	5.16334
7	2.46737e+07	6.0038
7	2.47659e+07	5.16819
7	2.51034e+07	7.24867
7	2.51361e+07	5.76751
7	2.53152e+07	6.22151
7	2.59245e+07	6.19527
7	2.60164e+07	5.02347
7	2.60349e+07	5.68607
7	2.60454e+07	5.08933
7	2.60526e+07	6.04169
7	26684358	5.21437
7	2.67377e+07	5.37655
7	3.78646e+07	5.37291
7	6.55568e+07	7.43115
7	6.55852e+07	5.25197
7	6.56359e+07	5.4731
7	6.5655e+07	9.1687
7	7.1735e+07	5.21206
7	7.4544e+07	5.8107
7	8.48061e+07	5.69672
8	1.14744e+07	6.70785
8	1.18074e+07	6.18859
8	12024596	7.21353
8	16525323	5.5905
8	1.66448e+07	8.45172
8	2.18764e+07	5.39308
8	2.19366e+07	5.93863
8	2.19549e+07	5.77785
8	2.19961e+07	5.83504
8	2.25446e+07	5.49342
8	2.25551e+07	5.12418
8	2.50437e+07	5.77895
8	27135218	6.00346
8	2.80943e+07	6.73132
8	2.93654e+07	5.96081
8	29374464	7.2225
8	2.94052e+07	5.33263
8	2.94177e+07	5.59281
8	3.04559e+07	5.56931
8	3.0476e+07	7.91367
8	3.04824e+07	7.4789
8	3.04945e+07	10.9212
8	3.05163e+07	8.11574
8	3.05249e+07	5.37009
8	31665221	6.82625
8	32494357	6.88967
8	3.25234e+07	7.16943
8	3.25837e+07	6.31015
8	3.2617e+07	5.66626
8	32715101	6.93979
8	3.27337e+07	7.59052
8	3.27956e+07	5.77157
8	32804673	8.1481
8	3.28652e+07	5.80525
8	3.28849e+07	5.24518
8	3.2893e+07	5.10093
8	3.29642e+07	5.09749
8	32987611	8.58863
8	33033756	7.56004
8	3.32049e+07	8.26565
8	33374897	5.00831
8	3.37346e+07	5.13391
8	3.37552e+07	5.05733
8	33844920	5.83248
8	3.38834e+07	5.76388
8	3.44138e+07	6.81787
8	3.44651e+07	5.03155
8	3.45477e+07	9.50034
8	3.47951e+07	7.4119
8	34814500	5.65063
8	3.49548e+07	6.19896
8	3.50267e+07	8.3497
8	35302995	6.34196
8	3.53645e+07	8.00198
8	3.5504e+07	5.75235
8	3.55446e+07	7.19125
8	3.55555e+07	6.60225
8	3.56552e+07	6.69569
8	4.58857e+07	6.59656
8	4.7048e+07	6.43484
8	5.02155e+07	5.38535
8	5.02258e+07	5.02118
8	5.37645e+07	5.11194
8	5.38258e+07	7.92998
8	5.67027e+07	9.85603
8	5.70761e+07	5.63908
8	5.76252e+07	5.38395
8	57675191	6.58012
8	5.76951e+07	8.85392
8	5.77355e+07	6.19207
8	5.77543e+07	10.2056
8	57954503	5.18027
8	5.80446e+07	6.56403
8	58684122	5.50946
8	5.88425e+07	5.27082
8	5.88531e+07	5.29316
8	72623894	6.05645
8	8.31556e+07	5.26183
8	8.55655e+07	5.86318
8	8.5616e+07	7.38173
8	8.90067e+07	5.53875
8	9.05629e+07	5.21004
9	6.99646e+06	8.51886
9	7.27407e+06	7.25815
9	2.19733e+07	5.14934
9	44694943	5.54045
9	6.29529e+07	6.47815
9	6.94379e+07	5.49629
9	6.95853e+07	9.64124
9	6.9593e+07	12.5458
9	6.96348e+07	8.54028
9	6.96462e+07	10.606
9	6.96567e+07	10.2065
9	69693948	6.18661
9	69713887	6.12925
9	6.97546e+07	6.26138
9	6.97639e+07	5.11497
9	6.97856e+07	7.70218
9	69834702	8.49736
9	69846892	5.76993
9	6.9863e+07	5.6083
9	6.98758e+07	8.68931
9	6.98935e+07	7.17026
9	69922814	12.0574
9	69966872	5.74862
9	70576397	8.13356
9	7.06755e+07	7.94525
9	7.07054e+07	6.97004
9	7.07358e+07	15.9594
9	7.07649e+07	10.4062
9	7.0795e+07	10.0409
9	7.08141e+07	15.321
9	7.08367e+07	7.62792
9	7.08571e+07	9.74339
9	7.08645e+07	10.1193
9	7.08731e+07	8.36811
9	7.0894e+07	5.82727
9	7.09145e+07	6.45817
9	7.09448e+07	5.86274
9	71245734	5.67593
9	7.65254e+07	9.97528
9	7.65446e+07	6.21493
9	7.78036e+07	6.33338
9	7.82151e+07	5.24152
9	7.83429e+07	5.5675
9	7.83539e+07	5.29347
9	7.90565e+07	8.05179
9	7.91052e+07	5.66651
9	7.98854e+07	5.26519
9	8.09653e+07	5.09692
9	8.09842e+07	6.41695
9	8.1057e+07	5.41654
9	8.13533e+07	6.64501
9	8.14431e+07	7.72743
9	8.16927e+07	6.66629
10	5.1988e+06	5.83326
10	6.18754e+06	5.17874
10	1.50954e+07	5.53176
10	1.62575e+07	6.64015
10	20405090	5.77493
10	2.13064e+07	5.79232
10	2.13556e+07	9.17178
10	2.15853e+07	5.51205
10	2.22021e+07	7.09027
10	2.2696e+07	6.09321
10	22702257	6.90292
10	2.27452e+07	6.83524
10	2.32258e+07	5.33244
10	23244548	12.7309
10	2.32562e+07	9.80139
10	2.32866e+07	6.42653
10	2.3557e+07	6.1526
10	2.35748e+07	8.53474
10	2.3583e+07	7.44532
10	2.35941e+07	5.02937
10	2.36869e+07	5.94734
10	2.3737e+07	6.51318
10	2.37951e+07	5.09974
10	2.38051e+07	6.53254
10	2.38337e+07	5.55749
10	23894011	5.1662
10	2.39569e+07	8.25865
10	23974647	5.58558
10	2.39855e+07	7.05692
10	2.40144e+07	7.32261
10	2.40262e+07	5.87285
10	2.6373e+07	5.4212
10	2.87832e+07	5.10458
10	28795397	5.55008
10	3.02253e+07	5.06761
10	3.05345e+07	5.13746
10	3.09433e+07	5.65062
10	3.09649e+07	6.50824
10	3.09742e+07	5.82277
10	3.09836e+07	10.1717
10	3.10059e+07	5.14449
10	3.10344e+07	9.71532
10	3.10876e+07	5.57442
10	3.11054e+07	6.1604
10	3.1118e+07	6.74845
10	3.11747e+07	10.9092
10	3.11963e+07	5.02419
10	3.12349e+07	5.23697
10	31307334	5.98967
10	3.1355e+07	5.55268
10	3.15337e+07	5.34762
10	3.15671e+07	5.28016
10	31573406	5.48437
10	31634703	5.03525
10	3.1666e+07	5.60922
10	3.16771e+07	7.42659
10	3.17551e+07	5.65969
10	3.18059e+07	5.10488
10	3.37659e+07	5.40703
10	3.3914e+07	6.32146
10	33973250	6.87066
10	3.41258e+07	6.88733
10	3.43052e+07	5.82889
10	3.43858e+07	5.29863
10	3.44676e+07	5.52962
10	3.50548e+07	5.45973
10	3.64951e+07	5.55455
10	3.72753e+07	7.07262
10	3.7885e+07	5.4052
10	3.83045e+07	5.06837
10	3.84246e+07	6.81266
10	3.97348e+07	5.50307
10	3.97949e+07	6.14871
10	4.01252e+07	5.02736
10	4.03459e+07	5.21971
10	4.08755e+07	5.50498
10	4.09731e+07	8.11346
10	4.10042e+07	8.30254
10	4.10378e+07	6.76671
10	4.16851e+07	6.10552
10	4.21651e+07	7.86671
10	4.3136e+07	5.65145
10	43145064	5.03541
10	4.33135e+07	6.34954
10	4.34242e+07	7.14244
10	4.34565e+07	6.56625
10	43721802	5.91241
10	4.39835e+07	6.0659
10	43994684	7.48713
10	4.40147e+07	6.96107
10	4.46132e+07	5.33633
10	45402540	5.72696
10	45723253	5.37777
10	45947196	5.10356
10	4.59555e+07	6.44304
10	5.35065e+07	6.85594
10	5.64644e+07	5.57818
10	5.69537e+07	5.71478
10	59855602	6.47121
10	6.66227e+07	11.2701
10	6.66426e+07	7.46652
10	6.67873e+07	7.37813
10	7.10135e+07	5.40344
10	7.11651e+07	7.78203
10	71177894	6.58908
10	7.12059e+07	8.40652
10	7.1365e+07	17.7783
10	7.13743e+07	5.01207
10	7.14238e+07	9.57759
10	71434624	9.99664
10	7.14763e+07	5.78378
10	7.14847e+07	10.4422
10	7.16249e+07	8.41748
10	7.17529e+07	6.55317
10	7.1795e+07	5.10134
10	71844158	8.66942
10	7.18568e+07	5.91582
10	71904112	13.9643
10	7.19154e+07	9.78874
10	7.19627e+07	5.91092
10	72097812	6.03376
10	7.21174e+07	6.79221
10	7.22846e+07	10.5357
10	8.29958e+07	7.94794
10	8.30872e+07	5.30588
10	8.32159e+07	5.66601
10	8.32357e+07	7.86442
10	8.33537e+07	7.23711
10	8.33859e+07	5.53368
10	8.34164e+07	8.09188
10	8.34457e+07	7.30783
10	8.34569e+07	7.88016
10	8.35249e+07	5.14239
10	8.35843e+07	7.82292
10	8.35943e+07	5.33347
10	8.36247e+07	5.40313
10	8.36349e+07	6.3803
10	83654251	6.83241
10	8.36663e+07	5.72825
10	8.36948e+07	5.38401
10	83744000	10.7564
10	8.37775e+07	7.25054
10	8.3805e+07	6.06985
10	8.38157e+07	6.07163
10	8.38253e+07	7.14613
10	8.38455e+07	5.03183
11	4.6468e+06	9.73197
11	4.72545e+06	11.0977
11	1.1645e+07	5.1432
11	13843613	7.29535
11	1.40123e+07	7.22157
11	1.41559e+07	10.7752
11	1.42148e+07	6.75997
11	1.42459e+07	9.00009
11	1.43669e+07	12.4831
11	1.44938e+07	9.18221
11	14514839	6.4168
11	1.45258e+07	5.57183
11	1.46545e+07	5.51677
11	1.51059e+07	8.06984
11	1.51148e+07	6.33623
11	1.52373e+07	5.76591
11	1.52843e+07	9.16029
11	1.55827e+07	5.59825
11	1.56341e+07	7.66362
11	15683486	9.51693
11	1.57363e+07	6.89942
11	1.57552e+07	6.43617
11	1.57833e+07	5.12655
11	1.57942e+07	5.53775
11	1.64643e+07	6.6626
11	1.64755e+07	7.44401
11	1.65541e+07	7.30285
11	1.66454e+07	6.19718
11	16843831	5.71902
11	1.69038e+07	7.35721
11	16925693	5.63047
11	1.69558e+07	6.25958
11	1.70243e+07	5.19583
11	1.8384e+07	5.3601
11	1.91246e+07	6.73856
11	1.91757e+07	5.94879
11	2.31944e+07	7.10065
11	2.32775e+07	7.77045
11	2.32849e+07	6.81293
11	2.33557e+07	6.12643
11	2.37267e+07	6.92521
11	2.38549e+07	11.6609
11	2.38837e+07	5.40594
11	2.40049e+07	5.56096
11	3.06253e+07	5.49925
11	3.06867e+07	8.15231
11	30897278	5.01719
11	3.09351e+07	7.01832
11	3.09429e+07	5.15143
11	3.10035e+07	5.39462
11	3.23341e+07	5.14241
11	3.23946e+07	6.23184
11	3.24052e+07	5.84345
11	3.25876e+07	7.95269
11	3.26139e+07	6.64129
11	3.26554e+07	5.67665
11	3.27146e+07	5.87457
11	32773029	6.57031
11	3.27843e+07	8.77061
11	3.2796e+07	7.02214
11	3.28056e+07	7.67516
11	3.2815e+07	6.4295
11	3.28249e+07	7.80968
11	3.28344e+07	8.02334
11	3.28468e+07	5.9857
11	3.28857e+07	6.52349
11	3.29014e+07	7.02877
11	3.29346e+07	5.55352
11	3.30547e+07	5.99744
11	3.44548e+07	5.25174
11	3.45065e+07	5.13155
11	3.45845e+07	5.68646
11	3.47456e+07	6.58876
11	3.49078e+07	6.3497
11	3.4946e+07	5.51889
11	3.51056e+07	6.45908
11	3.51135e+07	6.27612
11	35325508	5.00976
11	3.54032e+07	7.4676
11	3.5467e+07	5.12406
11	35514969	6.5234
11	35524619	7.69226
11	3.55532e+07	15.2441
11	3.55837e+07	8.18157
11	3.56054e+07	7.49783
11	3.56154e+07	5.5481
11	3.5654e+07	8.59116
11	35662840	7.77627
11	3.56849e+07	5.90146
11	3.56953e+07	5.55882
11	3.57243e+07	6.09462
11	3.57553e+07	5.24654
11	3.57742e+07	7.78865
11	3.57947e+07	5.59614
11	3.58468e+07	6.85801
11	35865717	7.36797
11	3.59038e+07	5.09642
11	3.59157e+07	6.6472
11	3.59758e+07	6.01263
11	3.59949e+07	7.86937
11	3.6006e+07	10.1829
11	3.60151e+07	10.7425
11	3.60345e+07	6.74204
11	3.60455e+07	7.07972
11	36055745	6.68725
11	3.60663e+07	7.95501
11	3.60743e+07	7.567
11	3.61037e+07	8.32663
11	3.61129e+07	8.83143
11	3.61257e+07	6.68247
11	3.61351e+07	9.21276
11	3.61454e+07	9.27883
11	36156446	8.75093
11	3.61636e+07	9.39039
11	36173676	6.89897
11	3.61944e+07	5.00416
11	3.71943e+07	5.50123
11	3.75546e+07	6.07807
11	3.76252e+07	5.63224
11	3.80041e+07	6.94081
11	3.81832e+07	5.47846
11	38253617	6.09472
11	3.82748e+07	5.68268
11	3.82821e+07	5.30866
11	3.82951e+07	5.14647
11	3.83271e+07	6.79757
11	3.83357e+07	9.29968
11	3.86848e+07	7.80913
11	3.86952e+07	8.05371
11	3.87144e+07	5.02015
11	3.87963e+07	5.38568
11	3.88558e+07	5.17531
11	3.94333e+07	5.88085
11	3.9483e+07	6.02631
11	39492446	9.78581
11	3.95562e+07	7.92821
11	39674967	5.47607
11	40446371	5.08243
11	40856176	11.1675
11	4.08635e+07	8.59109
11	4.08838e+07	6.64322
11	4.09159e+07	5.85047
11	4.09451e+07	5.4708
11	4.16859e+07	8.4326
11	4.17157e+07	5.11611
11	41745933	9.22341
11	4.17661e+07	5.21176
11	4.17751e+07	6.91571
11	4.18071e+07	5.44265
11	4.18558e+07	6.56824
11	4.18632e+07	7.40731
11	4.18745e+07	6.97618
11	4.18981e+07	6.41788
11	4.32769e+07	7.4424
11	43327521	7.00162
11	4.45353e+07	5.47794
11	44545597	6.20471
11	4.72566e+07	5.44465
11	5.06745e+07	5.57782
11	5.4255e+07	5.30356
11	5.86369e+07	7.97352
11	5.94238e+07	11.6529
11	5.94447e+07	5.29753
11	59804725	5.56549
12	1.69409e+06	6.3912
12	1.97696e+06	5.17351
12	5.23326e+06	9.8203
12	5.34638e+06	6.36222
12	5.45646e+06	7.26235
12	6.3048e+06	7.82537
12	6762177	6.11816
12	6.8837e+06	5.34463
12	2.02152e+07	5.37256
12	2.2346e+07	5.12524
12	2.39865e+07	5.48634
12	32418084	5.03078
12	3.26051e+07	5.61175
12	3.26155e+07	5.03504
13	8622694	5.43084
13	9.91597e+06	5.28019
13	1.02844e+07	5.20967
13	1.03658e+07	6.97986
13	16842795	5.20695
13	1.73567e+07	5.17401
13	1.75859e+07	7.96068
13	1.7605e+07	5.26008
13	1.76146e+07	5.59037
13	1.76729e+07	9.03632
13	17696306	9.98889
13	1.77037e+07	10.3608
13	1.77335e+07	11.0002
13	2.15471e+07	5.08602
13	2.28651e+07	5.61744
13	2.46328e+07	5.58338
13	2.70172e+07	5.98877
13	2.82726e+07	5.59182
13	2.8335e+07	6.51773
13	2.84258e+07	5.39925
13	3.10037e+07	5.88905
13	3.10951e+07	5.85125
13	34204483	6.55822
13	3.71054e+07	6.01703
13	37374548	6.89039
13	37874066	6.3947
13	37885790	6.36588
13	37935358	6.05372
13	38002642	7.59586
13	3.80266e+07	8.48463
13	3.8984e+07	6.09289
13	3.89988e+07	5.52596
13	3.95242e+07	10.5488
13	39545428	6.84844
13	39554937	9.95613
13	3.98226e+07	6.63278
13	40243678	6.23206
13	40405468	5.999
13	4.08748e+07	5.11761
13	4.08851e+07	5.40678
13	4.09339e+07	5.8578
13	4.09448e+07	11.6416
13	4.09661e+07	6.31452
13	4.10268e+07	5.57781
13	4.10365e+07	5.27844
13	4.12246e+07	5.73534
13	4.22935e+07	5.07705
13	4.23454e+07	5.78495
13	4.23639e+07	5.31834
13	42476349	5.20773
14	1.48325e+06	5.45985
14	5557537	6.85213
14	5.57522e+06	6.18524
14	5.58346e+06	7.04729
14	5.76488e+06	5.38617
14	7.90433e+06	9.5184
14	1.03345e+07	5.38952
14	1.06042e+07	5.03746
14	1.06648e+07	5.47919
14	1.1824e+07	5.57005
14	1.56652e+07	6.2525
14	1.57064e+07	6.19612
14	27755498	5.99398
14	3.31956e+07	5.53542
14	33436620	6.97232
14	33585401	5.80152
14	38142586	5.57811
14	3.91259e+07	7.01307
14	3.91345e+07	6.99464
14	3.94346e+07	5.72949
14	3.9455e+07	6.68033
14	3.9657e+07	5.43307
14	3.9706e+07	8.15951
14	39754075	7.22876
14	3.97848e+07	6.54067
14	3.98062e+07	5.71358
14	3.9966e+07	8.61394
14	3.99733e+07	5.46289
14	39994186	10.3473
14	4.00365e+07	5.87425
14	4.00545e+07	6.98884
14	4.01839e+07	5.86396
14	4.0198e+07	10.9479
14	4.02037e+07	7.26908
14	4.0214e+07	5.33312
14	4.02251e+07	14.3252
14	4.02435e+07	5.28707
14	4.02558e+07	6.65825
14	4.02943e+07	7.05113
14	4.03259e+07	12.7789
14	4.03342e+07	6.64088
14	4.03858e+07	9.26639
14	4.03938e+07	12.9599
14	4.04742e+07	10.8474
14	4.04858e+07	5.63046
14	4.05245e+07	5.42616
14	4.05447e+07	6.52376
14	4.05851e+07	5.63868
14	40636079	8.75512
14	4.06669e+07	9.79275
14	40683918	9.21649
14	4.07042e+07	10.53
14	4.07648e+07	8.58245
14	4.07932e+07	8.67985
14	40804104	6.07459
14	4.08153e+07	9.81229
14	4.08527e+07	10.796
14	4.08859e+07	6.67594
14	4.11553e+07	6.64557
14	4.11643e+07	5.81795
14	4.42441e+07	5.32479
14	4.42733e+07	9.80329
14	4.43338e+07	6.36937
14	4.51247e+07	5.26819
14	4.51343e+07	5.18817
14	4.68059e+07	5.40576
14	4.81334e+07	5.29981
14	4.86241e+07	5.14677
14	5.05965e+07	5.70907
14	5.06561e+07	8.07953
14	5.07752e+07	11.5082
14	5.08057e+07	5.17817
14	50914480	5.57492
14	5.12659e+07	6.16094
14	5.12727e+07	5.30052
14	5.18157e+07	6.30631
14	5.1873e+07	6.45425
14	5.18948e+07	5.25301
14	5.49748e+07	7.99607
14	5.49841e+07	5.141
14	5.51542e+07	8.13222
14	6.00744e+07	7.21369
14	64823216	6.19685
14	6.5136e+07	6.12378
14	65185622	5.16272
14	6.5217e+07	5.90083
14	6.52249e+07	6.83615
14	6.53253e+07	9.19572
14	65355389	7.97099
14	65394319	9.90308
14	65464962	5.72544
14	6.54759e+07	9.2793
14	6.55554e+07	5.6415
14	6.57546e+07	5.04855
14	6.57657e+07	7.33681
14	6.57744e+07	10.1219
14	65824513	7.01141
14	65896930	5.10258
14	6.59047e+07	18.7964
14	6.59158e+07	8.07094
14	65983101	8.86327
14	6.60069e+07	7.63158
14	66577961	5.18635
14	6.70245e+07	5.14192
14	6.71557e+07	6.25783
14	67195216	5.75084
14	6.72059e+07	10.3954
14	6.72352e+07	5.04798
14	6.91255e+07	5.20383
14	6.9266e+07	5.36572
14	6.97361e+07	5.67608
14	6.97757e+07	7.24651
14	6.99566e+07	5.29867
14	7.00064e+07	5.68899
14	7.47257e+07	5.56531
14	7.49664e+07	5.70386
14	7.50249e+07	6.45279
14	7.67192e+07	7.3363
14	76722258	6.31507
14	7.67353e+07	6.49418
14	77095527	9.48525
14	7.71071e+07	6.53463
14	7.71361e+07	5.9756
14	7.94162e+07	5.65966
14	8.57067e+07	5.8661
14	85726972	6.95801
14	86375223	6.53123
14	8.63973e+07	8.89981
14	8.64057e+07	8.4059
14	86606503	6.16415
14	8.66545e+07	8.70673
14	86935442	5.9693
14	8.69657e+07	5.7072
14	8.69739e+07	6.02677
14	8.70243e+07	5.12057
14	8.71243e+07	6.84712
14	8.71353e+07	8.45745
14	8.71571e+07	7.30455
14	8.71741e+07	7.14111
14	8.72136e+07	8.39962
14	87254538	5.65378
14	87435922	7.14079
14	8.74652e+07	7.38001
14	9.00275e+07	6.14001
14	9.06646e+07	6.725
14	9.0736e+07	5.7301
14	9.11933e+07	9.59453
15	884717	7.26612
15	1.44563e+06	5.16851
15	1.45586e+06	6.097
15	1.53484e+06	11.0062
15	1.56373e+06	6.9113
15	2.14438e+06	6.4186
15	2.16404e+06	7.50276
15	2.7047e+06	6.21449
15	9.5667e+06	5.68031
15	9574111	5.68953
15	9713350	5.79421
15	9.75567e+06	5.50881
15	1.07633e+07	5.51703
15	2.33568e+07	6.49167
15	3.97664e+07	6.47953
15	3.97938e+07	5.69544
15	3.98048e+07	7.09968
15	3.99138e+07	5.86901
15	39945735	6.18452
15	3.99774e+07	6.33542
15	40024536	5.6417
15	46445877	5.90162
15	5.49955e+07	5.12292
15	5.50761e+07	5.80569
15	5.61375e+07	5.83357
15	5.7443e+07	6.8589
15	5.77062e+07	8.56745
15	8.57822e+07	6.26957
15	87243754	5.79108
15	8.92259e+07	5.53077
15	8.92346e+07	9.4442
15	8.94423e+07	5.77022
15	89644731	7.22044
15	89676681	5.2443
15	8.98373e+07	7.29613
16	2765086	6.5864
16	3.03493e+06	5.24939
16	9416528	5.12263
16	1.02746e+07	6.18849
16	1.08053e+07	5.32423
16	1.10156e+07	5.89855
16	1.16844e+07	5.94783
16	12895414	6.26488
16	18853787	5.25662
16	2.26527e+07	6.57295
16	2.26663e+07	8.06
16	2.40839e+07	8.54932
16	2.4144e+07	7.10171
16	2.41635e+07	11.6461
16	2.41937e+07	5.3756
16	2.42462e+07	6.09465
16	2.46558e+07	6.82825
16	2.69856e+07	6.39058
16	3.45457e+07	5.65829
16	3.45745e+07	5.41425
16	3.46922e+07	5.33249
16	3.48345e+07	5.31453
16	3.48762e+07	8.26228
16	5.21744e+07	5.51156
16	5.51243e+07	5.96869
16	58335238	9.03273
16	6.04432e+07	5.7156
16	6.06467e+07	5.41482
16	6.39572e+07	5.24213
16	6.42529e+07	5.40924
16	6.43959e+07	9.18727
16	6.45555e+07	7.14018
16	6.46568e+07	6.84271
16	6.61341e+07	7.21783
16	7.1045e+07	5.51336
16	7.14435e+07	5.62436
16	7.3234e+07	6.32993
16	7.32639e+07	6.92136
16	7.34242e+07	7.00155
16	7.57571e+07	5.4773
17	104641	5.73618
17	1.40518e+06	8.24793
17	1.48794e+06	8.93808
17	1.51586e+06	7.04953
17	1.55297e+06	14.7232
17	1.57633e+06	9.50329
17	1.5854e+06	6.33766
17	1.59274e+06	9.24597
17	1.61453e+06	6.12551
17	1.62396e+06	10.2846
17	1.63199e+06	5.28725
17	1.70356e+06	5.56424
17	1.90353e+06	5.50168
17	1.9568e+06	6.72597
17	1.98656e+06	5.21395
17	2.00746e+06	5.0272
17	2046550	5.21378
17	2.15448e+06	9.34839
17	2.18662e+06	5.50644
17	4.28675e+06	7.29977
17	8.12513e+06	6.05898
17	9.33378e+06	5.21582
17	11893078	5.71932
17	1.19265e+07	5.59698
17	1.19554e+07	5.37448
17	12895181	5.76498
17	1.29951e+07	5.17238
17	1.33524e+07	5.30814
17	1.33658e+07	6.00183
17	13504015	5.52775
17	1.35726e+07	6.13204
17	1.36064e+07	8.51467
17	1.49869e+07	6.7382
17	15054304	8.09835
17	1.52147e+07	5.65163
17	1.5224e+07	5.92894
17	1.53442e+07	5.49366
17	15425792	5.84202
17	1.66936e+07	5.3033
17	1.67033e+07	7.72506
17	1.6754e+07	5.27169
17	2.00734e+07	5.60438
17	20095964	6.91108
17	2.01749e+07	6.97463
17	2.01839e+07	7.67594
17	2.01963e+07	7.26916
17	2.02148e+07	5.25321
17	2.02241e+07	7.47336
17	2.0254e+07	5.47597
17	2.03358e+07	5.6657
17	2.03468e+07	7.29949
17	2.03637e+07	5.22125
17	21025573	7.42251
17	2.32721e+07	5.06647
17	2.3485e+07	6.25353
17	2.34944e+07	5.29683
17	2.40264e+07	6.63142
17	26604295	5.09549
17	3.02838e+07	5.93637
17	3.05871e+07	7.34186
17	3.06369e+07	5.24403
17	3.23149e+07	5.85761
17	3.23538e+07	5.08324
17	3.2465e+07	5.31429
17	3.51853e+07	5.44813
17	4.43938e+07	5.09261
17	5.99955e+07	6.07884
17	6.00253e+07	10.2983
17	6.01148e+07	5.8936
17	6.01322e+07	5.60783
17	6.02167e+07	5.42502
17	6.02466e+07	6.10972
17	6.0385e+07	7.12387
17	6.03953e+07	5.6785
17	6.04852e+07	5.46168
17	6.15746e+07	5.84102
17	7.37943e+07	5.20056
17	7.91976e+07	5.2863
18	4.96645e+06	8.37571
18	4986615	8.51982
18	4.99421e+06	8.85237
18	5.1135e+06	6.55267
18	5716089	6.30129
18	5.72535e+06	6.17982
18	6.1451e+06	7.22764
18	6.16475e+06	8.81624
18	6393449	6.90775
18	8.58779e+06	5.46566
18	1.90955e+07	5.05673
18	1.91939e+07	6.90083
18	19875175	5.12988
18	2.13661e+07	6.13832
18	2.64944e+07	7.25577
18	2.65341e+07	5.09763
18	2.66049e+07	7.67305
18	2.73846e+07	9.88776
18	2.75939e+07	6.87514
18	2.76045e+07	9.2705
18	2.77358e+07	5.14468
18	2.77548e+07	6.86805
18	2.89557e+07	6.06871
18	2.89633e+07	5.43297
18	29034428	5.36606
18	29095968	7.20061
18	2.91654e+07	7.64317
18	2.98364e+07	5.05567
18	2.98757e+07	5.40921
18	34072539	5.7902
18	38244559	7.44248
18	4.05251e+07	9.15331
18	40555537	6.6984
18	4.25345e+07	5.05728
18	4.25949e+07	5.89879
18	42642874	6.85967
18	4.30321e+07	7.89542
18	4.3553e+07	7.96816
18	4.35628e+07	7.9399
18	4.35958e+07	8.34934
18	4.36145e+07	11.288
18	4.3715e+07	5.4926
18	4.37254e+07	10.6271
18	4.37957e+07	5.30775
18	4.40556e+07	5.43369
18	4.40947e+07	5.17189
18	4.4325e+07	8.14184
18	4.43958e+07	5.5971
18	4.44255e+07	7.96379
18	4.4464e+07	8.37089
18	4.45048e+07	6.73685
18	4.46049e+07	10.4302
18	4.47759e+07	7.17966
18	4.49043e+07	5.9281
18	44914403	8.69746
18	44934069	5.09349
18	4.55332e+07	6.84169
18	4.61983e+07	11.3136
18	5.07846e+07	5.31471
18	5.08962e+07	6.17811
18	5.09046e+07	5.80215
18	52173970	6.79252
18	5.22037e+07	8.7698
18	5.22143e+07	5.2984
18	5.2224e+07	5.12578
18	5.22639e+07	6.17872
18	52304660	5.87588
18	5.25544e+07	5.0761
18	5.69039e+07	5.80701
18	56915889	8.65028
18	5.69346e+07	8.19418
18	5.71054e+07	5.98083
18	5.71455e+07	5.07345
18	57163333	8.66184
18	5.72554e+07	5.13662
18	5.73465e+07	5.15947
18	5.73644e+07	7.58389
18	57385009	6.66381
18	5.73928e+07	9.46489
18	5.74055e+07	5.93834
18	5.74162e+07	5.17624
18	5.74458e+07	6.0664
18	5.74547e+07	6.58482
18	5.74773e+07	7.28004
18	6.3114e+07	5.18197
18	6.83549e+07	6.20714
19	3.11478e+06	6.67104
19	3245600	7.72508
19	3.06731e+07	5.48544
19	3.87345e+07	6.67964
19	47035924	5.6567
19	5.04165e+07	10.254
19	50442446	8.41799
19	50454290	5.14643
19	5.1236e+07	8.17134
19	5.12757e+07	5.88696
19	5.13156e+07	5.1796
19	5.13744e+07	10.8968
19	5.14956e+07	7.46827
19	5.32943e+07	6.46095
19	5.34348e+07	8.12537
19	5.3444e+07	5.57175
19	5.34549e+07	6.69305
19	54895190	7.7317
19	5.49266e+07	9.19538
19	5.49661e+07	7.21972
19	56003946	5.9625
20	2.22633e+06	5.80775
20	2.97528e+06	5.06268
20	4.1135e+06	6.07095
20	5.49812e+06	6.00715
20	9.23414e+06	5.23703
20	9.4943e+06	6.98837
20	1.28855e+07	9.81841
20	1.2914e+07	5.32037
20	2.51759e+07	5.27169
20	2.51861e+07	5.09183
20	2.51963e+07	7.3649
20	2.56229e+07	6.44088
20	2.56464e+07	5.64812
20	3.46437e+07	5.97429
20	34742471	5.66403
20	34765205	5.29846
20	3.5755e+07	6.8841
20	35765942	12.9186
20	3.57762e+07	8.05815
20	3.58268e+07	7.71273
20	3.58352e+07	6.51431
20	3.58742e+07	6.81304
20	3.58861e+07	10.4635
20	3.59544e+07	11.3589
20	3.59649e+07	7.953
20	3.61357e+07	8.97
20	3.61565e+07	7.36594
20	3.93343e+07	6.22376
20	4.52037e+07	5.32818
20	5.47556e+07	5.66157
20	5.81951e+07	6.5545
20	5.82732e+07	12.4026
20	58287582	5.05488
20	5.86478e+07	5.06963
20	59271441	6.65081
20	5.93664e+07	5.01033
20	5.93841e+07	5.54799
20	5.94571e+07	5.48624
20	5.94777e+07	6.89944
20	6.0565e+07	6.20943
20	6.13976e+07	6.88953
20	6.14557e+07	5.12474
20	62183419	5.64774
20	6.33252e+07	5.98388
20	6.33362e+07	5.7073
20	6.33449e+07	5.66929
20	6.33849e+07	5.57219
20	6.35364e+07	5.6213
20	63583401	5.72274
20	6.36533e+07	5.90914
20	6.37155e+07	7.47425
20	6.40844e+07	5.30983
21	2445631	5.23775
21	2475238	5.10793
21	3.49419e+06	5.54969
21	3967300	5.25739
21	4.88436e+06	5.14976
21	9.40621e+06	6.33155
21	1.17936e+07	5.08021
21	1.25748e+07	5.18318
21	1.40952e+07	5.70999
21	1.41036e+07	5.0992
21	15444348	6.37884
21	1.57359e+07	5.73158
21	15748652	9.83286
21	1.62943e+07	6.15614
21	1.64432e+07	5.51952
21	17605391	6.38375
21	17616462	6.51788
21	19544029	6.06398
21	1.96847e+07	6.89245
21	2.1125e+07	6.5579
21	2.11443e+07	5.66171
21	2.68856e+07	14.7534
21	26894726	6.38322
21	2.69078e+07	7.29711
21	2.69259e+07	7.16852
21	2.69423e+07	7.04124
21	2.72143e+07	8.96273
21	27235491	8.0375
21	27245294	6.68704
21	2.99728e+07	6.32528
21	2.99855e+07	7.02795
21	3.00136e+07	5.77745
21	3.01154e+07	5.07996
21	30575299	6.37938
21	3.05827e+07	6.15348
21	30666977	5.22685
21	3.16856e+07	6.68287
21	3.52341e+07	5.53803
21	3.65623e+07	9.75661
21	49156115	5.47787
22	3.89459e+06	8.98925
22	6.47577e+06	7.80411
22	6.48583e+06	5.54653
22	6.50426e+06	9.12258
22	6.51295e+06	6.29147
22	6.65596e+06	5.99167
22	6.74418e+06	7.27477
22	6784839	8.95973
22	7.79514e+06	7.42898
22	7.85301e+06	6.46461
22	7.90617e+06	5.30018
22	8.02604e+06	6.08176
22	8.31467e+06	5.44292
22	8.32369e+06	6.32444
22	8.33423e+06	5.13517
22	8.37544e+06	5.42895
22	1.34744e+07	5.37701
22	1.35449e+07	5.49019
22	1.37056e+07	5.78697
22	3.85462e+07	6.97053
22	3.90949e+07	5.91818
22	4.69147e+07	5.04393
22	4.78457e+07	5.16687
22	4.80256e+07	5.78514
22	4.80762e+07	5.54985
23	1.83807e+06	6.15921
23	2.0643e+06	7.23484
23	2.15479e+06	5.97348
23	2.16554e+06	5.69117
23	2.19279e+06	6.46472
23	2.54326e+07	6.19055
23	4.95615e+07	5.56327
23	5.02445e+07	5.99653
23	5.17958e+07	6.56515
23	5.18171e+07	6.70736
23	5.19446e+07	5.49107
24	1.03497e+06	5.32009
24	1.14711e+06	5.53827
24	1.24482e+06	5.08706
24	2.06398e+06	5.27806
24	2.1253e+06	5.00263
24	2.27244e+06	6.17425
24	2.50315e+06	5.04617
24	2.7737e+06	6.5512
24	6.35456e+06	5.50196
24	6.61444e+06	5.43213
24	9744341	6.9049
24	9757422	5.2472
24	12605916	5.20484
24	1.26245e+07	5.32868
24	12705452	6.90814
24	12713165	9.29236
24	12804209	5.77307
24	1.28846e+07	7.39069
24	12933680	7.49691
24	1.29845e+07	5.69352
24	1.30029e+07	5.42255
24	1.30265e+07	5.56543
24	13106005	8.55608
24	1.31353e+07	5.14321
24	1.32476e+07	9.10061
24	1.33267e+07	6.67382
24	14933932	6.84857
24	15076044	7.62806
24	1.57553e+07	7.51537
24	1.57746e+07	5.29532
24	15833923	5.54951
24	1.89651e+07	8.2275
24	1.93755e+07	5.85964
24	1.96653e+07	5.76162
24	1.98254e+07	6.30161
24	2.09152e+07	5.08309
24	2.0967e+07	10.0124
24	2.09746e+07	5.39344
24	2.10061e+07	5.76075
24	21174171	8.52207
24	21334725	5.62372
24	2.1944e+07	5.57592
24	2.24933e+07	10.0568
24	22543076	6.42598
24	22574319	5.98619
24	2.2616e+07	6.52097
24	22644527	6.61874
24	2.26757e+07	8.268
24	22685914	8.07641
24	2.38056e+07	6.56273
24	2.64064e+07	5.60307
24	2.81077e+07	5.29191
24	2.90136e+07	6.79687
24	3.6153e+07	5.65057
24	3.6446e+07	5.4911
24	3.73155e+07	5.91062
24	3.99244e+07	6.92347
24	4.09565e+07	5.02228
24	4.15843e+07	6.43805
24	4.25947e+07	5.18523
24	4.28456e+07	7.23315
24	4.29152e+07	5.12401
24	4.29851e+07	7.67738
24	4.33034e+07	9.82161
24	4.36533e+07	5.30969
24	4.37046e+07	5.86564
24	4.37842e+07	5.57772
24	4.38248e+07	5.62481
24	4.38938e+07	5.54739
24	4.39053e+07	5.81166
24	4.42366e+07	5.7578
24	44872557	5.31177
24	4.49154e+07	5.86293
24	44944924	6.72041
24	44956455	7.63455
24	4.49735e+07	8.44964
24	44995325	7.69511
24	4.51879e+07	8.48876
24	4.52054e+07	5.38445
24	4.52454e+07	9.65273
24	4.52939e+07	5.10772
24	4.53028e+07	7.83223
24	4.60639e+07	5.25909
24	4.67133e+07	5.65298
25	315868	5.03321
25	705230	5.29057
25	1.38624e+06	5.54188
25	1.45711e+06	5.85717
25	1474116	11.2061
25	1.48528e+06	8.98254
25	1.53549e+06	7.20232
25	1.64367e+06	5.33608
25	1806052	5.26807
25	2.16628e+06	5.82062
25	3.29479e+06	8.35759
25	4226860	6.27606
25	4406443	6.1533
25	4.71318e+06	5.00923
25	6.26386e+06	5.91458
25	6.71491e+06	5.9043
25	6.73423e+06	5.72922
25	6.77644e+06	7.50652
25	7145221	5.19379
25	7.15617e+06	7.79434
25	7.56552e+06	5.60903
25	7.75281e+06	5.34064
25	7.7764e+06	6.03499
25	8346471	5.37779
25	8.3939e+06	6.79063
25	9.34411e+06	5.51976
25	9.44536e+06	5.39861
[truncated: 353 more rows]

## Sheet: E. WesternPleasure-hapQTL
Supplementary Table 3E. Significant ROI identified by di in the Western Pleasure QH subpopulation.
Chromosome Number	SNP position (bp)	Bayes Factor value
1	173581	5.122
1	175631	5.232
1	289588	5.711
1	346380	5.608
1	350638	5.557
1	351001	6.068
1	351026	5.321
1	356986	5.482
1	1465380	5.131
1	1474727	5.429
1	1494082	6.5
1	1496041	7.561
1	1496166	6.87
1	1496768	5.906
1	1709782	5.014
1	1709978	5.442
1	1715385	6.189
1	1715416	6.2
1	1719854	5.658
1	1720018	5.675
1	1720039	6.021
1	1725250	5.431
1	1726057	5.599
1	1726675	5.311
1	1728563	5.487
1	1834097	5.212
1	1926923	6.176
1	1928269	7.582
1	1929923	5.984
1	1930908	7.36
1	1933862	6.72
1	1936301	6.219
1	2314614	5.916
1	2316212	5.446
1	2324180	5.555
1	2324275	5.191
1	2325260	5.55
1	2325352	5.219
1	2330974	5.493
1	2747809	7.618
1	2748554	8.631
1	2750014	8.37
1	2753761	8.49
1	2756156	9.103
1	2757655	10.566
1	2757991	7.058
1	2775391	5.077
1	2775563	5.059
1	2780819	5.111
1	2780960	5.945
1	2784069	5.243
1	2785449	5.716
1	2792984	5.706
1	2793026	5.918
1	2793249	5.024
1	2794768	5.786
1	2796052	5.958
1	2802951	6.425
1	2804764	5.043
1	2814891	5.223
1	2818743	6.346
1	2820395	5.568
1	2822090	5.667
1	2822716	5.749
1	2826930	5.875
1	2827456	6.7
1	2827599	7.064
1	2827975	6.323
1	2999983	5.158
1	3147386	5.566
1	3149589	5.196
1	3150111	5.333
1	3154892	5.475
1	3155075	5.174
1	3156291	5.191
1	3156747	5.563
1	3156790	5.704
1	3160448	5.68
1	3195065	5.221
1	3196108	5.103
1	3196411	5.5
1	3196608	5.588
1	3203207	5.343
1	3203702	5.738
1	3204239	5.62
1	3209936	5.867
1	3211331	5.009
1	3211385	7.017
1	3212739	9.492
1	3216526	9.269
1	3219018	8.911
1	3219227	8.547
1	3219402	8.179
1	3223390	9.495
1	3223904	9.952
1	3226367	10.046
1	3227064	10.436
1	3227502	9.934
1	3227761	8.468
1	3228126	9.932
1	3228914	9.857
1	3230952	8.894
1	3236508	9.929
1	3236733	9.415
1	3238269	9.279
1	3240767	9.211
1	3241155	8.186
1	3241589	9.247
1	3247668	8.728
1	3248331	8.801
1	3248633	8.98
1	3250495	7.971
1	3251094	7.447
1	3253669	7.248
1	3253899	6.912
1	3254758	7.548
1	3257020	7.839
1	3259104	6.787
1	3259695	7.649
1	3261257	6.917
1	3261357	7.772
1	3266657	8.052
1	3266923	8.721
1	3267421	9.254
1	3267673	8.984
1	3268494	7.383
1	3270152	7.86
1	3270556	8.58
1	3270889	7.83
1	3273624	8.778
1	3275251	8.05
1	3276642	8.579
1	3279798	8.67
1	3286362	7.804
1	3288004	7.192
1	3288560	7.742
1	3290851	5.533
1	3291129	5.95
1	3292136	6.974
1	3293886	6.793
1	3295063	7.436
1	3295134	6.893
1	3295299	6.731
1	3301614	6.664
1	3307917	7.213
1	3308246	5.877
1	3310425	6.464
1	3311216	6.004
1	3311622	7.16
1	3313847	7.115
1	3314401	6.804
1	3315369	7.453
1	3315797	6.845
1	3316177	6.987
1	3319798	6.928
1	3320486	7.086
1	3322882	7.22
1	3323664	7.132
1	3323904	6.44
1	3327943	7.236
1	3331113	7.237
1	3331158	7.711
1	3331581	7.064
1	3332403	7.017
1	3333183	7.361
1	3333794	7.637
1	3334417	7.48
1	3335327	7.941
1	3336798	7.099
1	3337847	8.107
1	3341242	9.299
1	3343360	5.734
1	3399598	5.072
1	3450137	8.444
1	3451991	8.848
1	3452148	7.572
1	3452196	7.63
1	3452994	7.569
1	3458786	7.727
1	3459183	8.19
1	3461220	8.417
1	3463218	7.676
1	3465931	8.636
1	3466332	7.616
1	3466604	9.228
1	3468206	8.779
1	3469399	8.917
1	3469446	9.44
1	3477007	10.355
1	3479530	9.033
1	3480010	9.445
1	3483555	10.068
1	3484310	9.141
1	3485758	8.829
1	3486498	9.772
1	3488167	8.891
1	3489328	7.462
1	3490283	6.732
1	3494296	6.9
1	3494760	6.433
1	3497042	6.515
1	3500090	6.647
1	3500986	7.014
1	3502164	7.198
1	3502192	7.023
1	3502303	6.99
1	3502986	6.845
1	3503661	6.745
1	3505477	6.618
1	3507945	7.109
1	3508036	7.222
1	3508821	6.629
1	3511397	6.28
1	3511519	6.806
1	3511976	5.981
1	3512527	6.295
1	3513586	6.17
1	3514228	6.064
1	3514326	6.317
1	3515157	5.919
1	3516278	6.574
1	3518557	6.246
1	3525260	6.192
1	3526541	8.034
1	3531359	9.153
1	3537603	8.492
1	3538193	8.605
1	3539929	8.107
1	3540967	8.269
1	3541759	7.719
1	3542805	9.788
1	3542846	10.588
1	3547435	10.039
1	3548254	11.43
1	3548846	10.562
1	3553634	9.544
1	3555389	11.766
1	3557949	12.038
1	3558245	11.951
1	3560987	12.14
1	3561538	11.302
1	3564302	11.366
1	3564529	11.111
1	3565041	6.972
1	3565149	8.865
1	3566844	8.938
1	3567349	8.895
1	3567629	8.673
1	3569333	7.743
1	3569592	9.139
1	3622984	5.006
1	4336289	6.318
1	4337459	5.973
1	4338238	5.662
1	4341274	5.904
1	4346691	5.642
1	4347115	5.621
1	4349838	5.418
1	4350841	5.188
1	4353408	5.855
1	4355371	5.812
1	4360950	5.145
1	4363210	5.671
1	4365125	5.434
1	4365273	5.374
1	4370946	5.728
1	4795086	5.095
1	4795789	5.552
1	4796040	6.464
1	4799062	6.547
1	4799789	6.201
1	4799949	6.379
1	4800609	5.918
1	4802222	5.6
1	4805134	6.052
1	4808494	5.794
1	4809982	5.662
1	4812040	5.873
1	4812391	5.643
1	4814556	5.944
1	4816605	5.258
1	4838205	5.408
1	4839493	5.218
1	4840505	5.51
1	4841844	5.572
1	4843985	5.354
1	4844799	5.26
1	4846428	6.076
1	4846744	6.062
1	4847046	5.847
1	4847688	5.833
1	4851075	5.861
1	4852228	5.234
1	4854603	5.263
1	4857629	5.223
1	4859000	5.072
1	4859125	5.192
1	4859601	5.747
1	4860242	5.424
1	4862044	5.387
1	4863557	5.355
1	4865860	5.343
1	4865902	5.759
1	4866800	5.238
1	4870122	5.439
1	4873775	5.121
1	4954892	5.014
1	4981283	5.345
1	4982964	5.802
1	4986930	6.155
1	4987348	6.051
1	4990476	6.09
1	4991055	5.876
1	4991606	5.644
1	4992398	5.684
1	4992960	5.017
1	5039476	5.437
1	5040206	5.328
1	5044111	5.352
1	5044314	5.403
1	5045614	5.397
1	5045770	5.204
1	5045845	5.329
1	5047344	7.27
1	5049320	5.338
1	5067008	9.475
1	5067091	10.846
1	5068853	10.97
1	5069085	11.062
1	5069241	11.385
1	5071028	13.481
1	5071544	13.475
1	5071885	13.413
1	5072410	12.222
1	5074422	13.552
1	5074647	12.376
1	5076633	11.253
1	5076751	12.277
1	5077505	14.206
1	5078026	14.132
1	5079423	14.044
1	5080281	13.998
1	5080403	14.213
1	5082326	14.04
1	5082940	11.598
1	5085726	12.005
1	5087453	11.742
1	5087630	13.186
1	5088417	12.761
1	5088570	13.07
1	5089578	12.153
1	5090376	11.015
1	5090744	10.959
1	5096917	12.205
1	5098297	12.534
1	5103585	12.324
1	5104068	11.366
1	5106467	12.165
1	5107852	12.373
1	5108463	11.934
1	5108690	13.303
1	5109048	12.153
1	5120270	12.186
1	5121302	11.596
1	5124363	12.08
1	5124508	12.512
1	5124684	11.075
1	5127030	9.757
1	5128923	9.945
1	5130686	8.635
1	5135683	7.489
1	5137103	8.085
1	5137192	8.857
1	5137406	8.666
1	5137686	7.955
1	5138096	7.618
1	5142877	6.048
1	5143035	5.233
1	5144397	5.207
1	5145591	5.465
1	5146123	5.196
1	5146146	5.15
1	5146274	5.483
1	5146555	5.566
1	5149364	5.428
1	5149563	5.37
1	5351558	5.288
1	5547492	5.523
1	5548011	5.8
1	5548265	5.203
1	5552366	5.676
1	5553845	5.527
1	5554321	5.869
1	5561147	5.186
1	5561436	5.372
1	5566981	5.162
1	5571397	5.312
1	5571913	5.198
1	5652847	5.568
1	5653441	5.262
1	5653593	5.173
1	6064798	5.47
1	6066844	6.093
1	6066866	6.381
1	6069698	5.844
1	6070933	5.498
1	6072930	5.226
1	6073067	5.265
1	6075628	5.436
1	6076098	5.367
1	6078073	5.376
1	6078585	5.831
1	6079105	5.994
1	6079602	5.48
1	6083162	5.653
1	6088168	5.668
1	6089786	6.215
1	6093009	6.145
1	6093271	5.477
1	6094639	5.841
1	6094913	5.28
1	6098197	5.435
1	6098251	5.477
1	6098452	5.162
1	6098568	5.041
1	6108792	5.762
1	6108945	5.764
1	6110497	5.819
1	6111542	5.898
1	6123909	5.945
1	6126132	6.111
1	6127184	6.747
1	6127558	5.323
1	6127988	6.876
1	6128271	7.388
1	6128451	7.484
1	6129320	6.156
1	6129378	6.946
1	6130579	6.328
1	6132979	8.253
1	6135707	9.317
1	6135787	7.984
1	6137138	6.874
1	6138322	6.664
1	6141092	5.479
1	6141343	6.298
1	6210914	5.114
1	6222368	5.213
1	6224325	5.061
1	6225557	5.096
1	6225981	5.084
1	6227051	5.313
1	6227087	5.2
1	6394791	5.239
1	6394975	5.017
1	6398988	5.022
1	6399907	5.777
1	6400229	5.232
1	6400575	5.196
1	6401781	5.017
1	6404197	5.453
1	6405304	5.564
1	6408728	5.198
1	6408763	5.585
1	6410608	5.312
1	6414871	5.359
1	6415332	5.105
1	6415976	5.228
1	6418692	5.488
1	6420372	5.072
1	6420951	5.078
1	6421355	5.069
1	6421713	5.59
1	6424027	6.246
1	6753949	5.274
1	6765912	5.328
1	6789329	8.372
1	6789361	9.17
1	6790179	9.211
1	6790690	8.886
1	6791056	9.123
1	6791157	8.906
1	6793679	8.41
1	6794901	9.035
1	6798706	8.581
1	6801020	9.113
1	6805361	8.321
1	6807710	8.394
1	6808668	8.175
1	6810202	7.932
1	6810327	7.649
1	6813717	7.036
1	6813865	7.431
1	6815688	7.409
1	6816060	6.986
1	6816135	6.617
1	6817303	6.53
1	6817348	7.012
1	6817486	7.775
1	6818017	7.817
1	6820732	7.659
1	6821290	10.788
1	6824179	11.311
1	6832939	9.325
1	6833044	11.261
1	6833410	10.951
1	6833913	9.389
1	6837428	11.518
1	6839457	11.487
1	6840429	9.442
1	6840944	11.037
1	6843129	11.039
1	6843204	11.343
1	6843438	10.841
1	6843501	9.708
1	6843677	9.791
1	6845479	10.558
1	6846816	9.916
1	6847682	9.88
1	6848438	9.449
1	6849866	9.121
1	6853520	8.001
1	6853774	5.125
1	6855645	6.808
1	6855785	5.75
1	6860210	6.042
1	6860867	7.077
1	6862050	7.863
1	6863514	6.315
1	6863567	6.55
1	6866690	7.096
1	6867869	6.748
1	6868500	8.483
1	6869703	8.269
1	6869742	8.086
1	6869842	8.133
1	6871787	7.286
1	6872921	6.421
1	6873206	6.268
1	6875560	6.436
1	6876984	6.113
1	6878394	6.428
1	6878909	5.711
1	6883667	5.467
1	6884043	6.411
1	6884462	5.478
1	6884908	5.547
1	6887168	6.239
1	6890041	5.765
1	6891403	7.185
1	6892716	8.105
1	6893197	8.707
1	6896229	7.659
1	6897009	8.582
1	6897049	8.877
1	6897389	8.937
1	6898047	8.618
1	6899393	8.723
1	6900897	8.914
1	6901931	7.728
1	6902202	8.881
1	6902276	8.699
1	6903462	8.266
1	6904226	8.448
1	6905117	7.693
1	6906474	7.635
1	6907258	7.804
1	6908983	6.963
1	6912774	6.776
1	6913610	6.793
1	6917450	6.791
1	6920606	6.695
1	6923733	6.775
1	6924453	6.762
1	6924616	6.581
1	6929532	6.558
1	6930010	6.853
1	6931545	6.542
1	6933975	6.56
1	6934624	6.795
1	6935192	6.074
1	6935327	5.75
1	6936598	5.581
1	9052857	8.689
1	9055654	8.607
1	9056386	8.319
1	9058419	8.455
1	9058475	8.931
1	9058545	8.709
1	9058719	7.955
1	9059256	8.182
1	9059370	8.442
1	9060658	7.62
1	9993807	5.038
1	9995627	5.002
1	10171517	5.007
1	10178394	5.174
1	10180059	5.301
1	10191522	5.635
1	10193112	5.353
1	10193455	5.151
1	10198509	5.628
1	10199762	5.371
1	10202629	5.602
1	10203815	6.51
1	10208650	7.322
1	10208943	6.778
1	10209302	6.718
1	10210844	7.625
1	10211071	8.502
1	10212062	7.478
1	10214689	6.944
1	10215315	6.679
1	10215488	6.674
1	10216023	6.721
1	10216373	6.51
1	10218173	6.933
1	10223217	6.604
1	10223616	6.48
1	10224275	5.967
1	10267777	5.141
1	10317639	5.632
1	10317730	5.893
1	10320050	5.827
1	10321043	5.614
1	10322269	5.821
1	10324711	5.644
1	10325122	5.558
1	10325605	5.502
1	10325640	5.482
1	10397111	5.147
1	10397311	5.292
1	10815449	5.539
1	10815623	5.42
1	10818256	5.415
1	10818559	5.601
1	10819365	6
1	10820572	5.523
1	10821455	5.212
1	10823392	5.301
1	10824409	5.862
1	10825465	5.407
1	10825636	5.504
1	10826124	5.753
1	10826678	5.583
1	10827002	5.761
1	10829506	5.848
1	10830455	5.74
1	10831556	5.833
1	10833339	5.746
1	10834737	5.581
1	10834780	5.901
1	10836770	5.945
1	10837704	5.962
1	10839239	6.716
1	10844143	6.012
1	10844288	5.867
1	10844882	5.991
1	10846172	5.973
1	10847095	6.108
1	10848089	5.42
1	10848315	5.51
1	10850285	6.098
1	10850721	5.408
1	10860151	5.65
1	10861617	5.604
1	10862194	5.162
1	10865109	5.73
1	10866192	5.741
1	10866636	5.416
1	10889594	5.521
1	10889961	5.29
1	10892711	5.146
1	10906597	5.042
1	10909538	5.129
1	11006798	5.053
1	11019743	5.024
1	11026089	5.23
1	11032666	5.537
1	11059120	5.06
1	11062141	5.676
1	11101083	5.357
1	11105679	6.609
1	11111381	6.095
1	11122848	5.346
1	11123485	5.361
1	11126097	5
1	11130161	6.013
1	11130537	7.162
1	11132414	7.523
1	11132793	8.353
1	11135491	8.035
1	11136753	8.674
1	11138340	7.906
1	11142690	8.164
1	11144438	7.343
1	11144830	9.255
1	11147403	9.423
1	11149457	8.866
1	11149724	9.48
1	11150709	9.351
1	11151423	9.401
1	11154592	10.162
1	11154673	9.791
1	11157596	9.736
1	11162588	9.582
1	11165662	9.404
1	11166120	8.074
1	11166164	7.523
1	11169404	7.099
1	11169436	7.81
1	11170491	7.28
1	11171279	7.355
1	11173948	7.098
1	11173995	7.089
1	11174075	7.324
1	11176189	6.499
1	11176500	6.853
1	11178206	7.171
1	11178550	6.714
1	11178803	6.925
1	11179238	6.871
1	11179448	6.512
1	11179753	6.28
1	11180747	6.85
1	11181296	6.579
1	11185004	6.927
1	11187481	7.301
1	11187571	6.442
1	11188179	6.924
1	11188248	6.93
1	11189401	6.447
1	11190535	6.951
1	11191716	6.449
1	11192072	6.969
1	11193200	7.142
1	11193942	6.037
1	11395477	5.106
1	11396349	6.361
1	11396524	7.453
1	11396574	9.695
1	11397968	11.863
1	11400162	11.542
1	11400334	11.283
1	11404398	10.791
1	11404984	9.862
1	11407630	9.114
1	11408328	7.93
1	11413054	7.708
1	11414583	7.751
1	11415721	7.624
1	11416309	6.625
1	11417995	6.305
1	11419826	6.319
1	11421468	6.104
1	11421894	6.415
1	11421921	6.163
1	11422393	6.505
1	11422486	6.446
1	11424106	6.666
1	11424587	7.087
1	11425357	7.368
1	11425712	6.879
1	11426034	7.228
1	11426066	7.286
1	11426099	7.053
1	11426919	7.059
1	11426969	7.351
1	11428291	7.683
1	11431492	8.175
1	11432458	8.356
1	11436433	8.295
1	11441822	10.567
1	11443548	10.761
1	11443985	10.933
1	11444178	10.951
1	11444748	10.672
1	11445325	10.365
1	11446460	10.479
1	11447003	11.862
1	11448945	10.626
1	11451130	10.559
1	11453993	10.614
1	11454188	10.708
1	11456451	10.782
1	11457452	10.71
1	11460514	10.679
1	11461155	10.924
1	11464677	10.103
1	11465029	10.634
1	11466300	10.284
1	11468184	9.663
1	11468769	10.194
1	11469798	10.341
1	11470781	15.723
1	11471417	15.282
1	11474384	13.062
1	11476279	11.725
1	11479344	11.241
1	11479446	10.627
1	11481758	9.764
1	11481818	9.215
1	11483660	6.52
1	11484348	7.857
1	11484803	8.221
1	11485456	7.769
1	11488191	7.741
1	11492023	8.537
1	11492829	9.069
1	11492874	9.039
1	11493381	7.886
1	11493528	7.932
1	11493603	8.172
1	11495315	7.918
1	11495950	9.131
1	11497389	9.065
1	11497511	9.879
1	11498180	9.723
1	11498659	9.66
1	11499004	9.335
1	11499377	9.418
1	11505440	9.31
1	11505642	9.202
1	11506630	9.178
1	11506747	9.243
1	11507118	8.363
1	11511931	9.094
1	11513955	9.008
1	11513995	9.027
1	11514371	9.018
1	11514931	8.989
1	11515993	8.956
1	11516474	8.859
1	11516530	8.097
1	11517201	8.864
1	11517367	8.971
1	11517434	8.194
1	11520178	7.74
1	11520712	7.64
1	11521840	8.214
1	11522564	8.154
1	11522650	8.206
1	11523593	8.115
1	11525634	8.084
1	11530097	8.049
1	11535044	8.176
1	11535969	8.07
1	11537201	7.402
1	11539920	7.892
1	11541803	7.933
1	11543297	7.764
1	11545105	7.481
1	11546037	7.085
1	11546989	6.537
1	11547705	6.584
1	11547838	6.557
1	11547874	6.253
1	11548659	5.846
1	11552933	6.041
1	11552992	5.468
1	11553557	5.827
1	11555746	5.789
1	11556297	5.615
1	11557462	5.089
1	11558748	5.243
1	11578061	7.041
1	11578387	7.048
1	11579741	6.871
1	11580243	5.949
1	11580394	7.374
1	11581708	6.065
1	11581797	7.129
1	11582960	7.017
1	11583416	7.056
1	11583690	6.082
1	11584360	6.397
1	11585311	5.933
1	11589041	6.102
1	11592348	5.533
1	11595342	5.605
1	11596819	6.045
1	11597444	5.848
1	11598037	5.473
1	11601578	5.963
1	11602553	5.453
1	11602594	5.947
1	11622312	5.618
1	11630252	5.272
1	11631121	5.44
1	11632290	5.463
1	11632550	5.57
1	11632759	5.425
1	11633853	5.51
1	11634574	5.909
1	11634704	5.46
1	11635738	5.978
1	11650997	5.053
1	11660258	5.404
1	11720821	6.612
1	11721301	5.657
1	11723811	6.02
1	11724105	5.605
1	11724625	6.304
1	11729159	5.127
1	11922847	5.078
1	11922981	5.358
1	11923836	5.855
1	11924809	5.339
1	11937928	5.427
1	11938094	6.154
1	11938195	6.333
1	11939434	6.327
1	11941649	6.844
1	11941967	5.567
1	11942533	5.626
1	11942835	5.988
1	11943275	5.612
1	11946616	5.99
1	11946664	6.718
1	11949681	8.221
1	11950274	7.828
1	11950839	7.363
1	11950861	7.726
1	11953914	7.164
1	11956644	6.885
1	11957715	7.219
1	11959487	7.594
1	11959871	7.502
1	11960084	6.918
1	11961072	6.486
1	11961696	6.548
1	11962107	7.236
1	11962864	6.689
1	11963875	7.558
1	11964769	7.227
1	11964875	7.314
1	11970249	7.072
1	11971441	6.526
1	11973330	6.784
1	11974587	6.276
1	11976773	7.425
1	11977245	6.804
1	11978220	6.671
1	11978467	6.626
1	11979006	6.702
1	11979503	6.598
1	11980928	6.173
1	11981153	6.246
1	11984127	6.206
1	11984962	6.19
1	11985100	5.765
1	11986694	5.815
1	11994801	5.748
1	11994848	5.513
1	11997250	5.672
1	11997317	5.415
1	12000817	5.918
1	12057336	5.116
1	12057813	8.424
1	12057931	8.42
1	12058482	8.006
1	12059019	8.135
1	12060435	8.211
1	12060906	7.579
1	12061703	7.939
1	12062291	7.926
1	12063522	7.408
1	12065370	6.939
1	12067898	6.183
1	12076279	5.19
1	12077289	6.673
1	12078572	7.185
1	12082345	7.189
1	12083180	7.656
1	12083928	7.279
1	12084215	6.713
1	12084294	7.749
1	12086118	7.236
1	12086227	6.816
1	12086369	7.135
1	12088719	7.555
1	12092434	7.554
1	12093017	7.529
1	12094526	7.593
1	12094793	7.567
1	12104586	7.364
1	12105437	7.02
1	12105909	6.955
1	12106632	5.969
1	12108694	6.736
1	12125116	5.386
1	12125442	5.886
1	12125960	5.538
1	12126281	5.411
1	12128216	5.938
1	12130831	6.171
1	12131675	5.973
1	12132059	5.924
1	12132199	6.107
1	12133439	6.287
1	12135348	5.913
1	12136256	5.848
1	12137103	5.774
1	12137244	5.14
1	12137341	5.656
1	12138310	5.612
1	12138338	5.593
1	12138431	5.797
1	12142939	5.257
1	12144409	5.337
1	12144657	6.03
1	12144980	5.581
1	12145424	5.216
1	12146192	5.721
1	12147182	5.044
1	12155390	5.826
1	12155635	5.126
1	12158580	5.688
1	12165744	5.129
1	12170766	5.002
1	12172529	5.42
1	12185256	5.122
1	12188931	9.135
1	12190221	9.086
1	12190640	8.713
1	12190890	9.78
1	12191462	9.409
1	12191743	9.543
1	12192113	9.871
1	12192228	9.696
1	12193199	9.567
1	12193402	9.658
1	12197026	9.644
1	12197555	9.738
1	12198345	9.688
1	12199695	8.606
1	12200200	7.744
1	12201175	7.242
1	12201462	6.931
1	12201602	7.747
1	12203366	7.731
1	12203539	7.506
1	12203768	7.601
1	12203814	7.855
1	12204648	7.909
1	12205725	7.082
1	12207062	5.495
1	12207205	5.819
1	12211469	5.097
1	12213482	6.194
1	12213883	6.557
1	12215537	6.462
1	12215596	5.408
1	12216895	5.644
1	12216916	5.636
1	12221860	5.684
1	12222908	5.925
1	12223089	5.19
1	12223376	5.753
1	12225495	5.725
1	12229153	5.542
1	12232035	5.549
1	12235805	5.754
1	12237716	5.725
1	12238510	6.231
1	12253520	7.38
1	12253618	8.399
1	12257194	8.527
1	12257763	7.211
1	12257853	6.315
1	12257963	6.858
1	12258596	6.979
1	12259117	6.981
1	12259691	5.84
1	12263057	6.733
1	12263801	6.849
1	12265862	6.753
1	12267406	6.899
1	12267544	6.243
1	12270888	5.75
1	12271729	7.387
1	12271875	7.848
1	12274819	8.028
1	12274866	7.561
1	12276961	8.956
1	12278533	8.333
1	12279560	7.276
1	12279772	7.825
1	12280190	7.82
1	12281373	7.409
1	12288899	8.201
1	12289646	7.158
1	12294014	7.628
1	12294340	7.272
1	12294513	6.455
1	12296560	5.855
1	12297867	6.264
1	12299389	5.727
1	12300595	6.521
1	12301344	6.505
1	12301665	6.534
1	12303181	5.749
1	12304866	6.776
1	12305178	6.54
1	12305679	5.864
1	12308814	6.821
1	12309168	6.633
1	12311185	6.403
1	12319137	5.891
1	12319361	6.468
1	13293391	5.344
1	13294951	6.303
1	13296041	5.667
1	13296882	5.811
1	13297559	5.087
1	13298977	5.77
1	13301054	7.079
1	13302567	6.248
1	13302747	6.177
1	13303617	5.914
1	13303954	5.821
1	13305579	5.685
1	13307144	5.065
1	13493499	5.452
1	13493603	5.224
1	13493871	5.297
1	13495689	5.551
1	13496235	5.649
1	13496437	5.408
1	13496529	5.267
1	13498336	5.252
1	13498633	6.18
1	13499730	6.071
1	13501123	6.459
1	13501314	5.201
1	13501690	6.325
1	13502840	6.709
1	13502964	9.215
1	13503187	8.862
1	13504952	8.496
1	13506554	8.932
1	13506613	8.925
1	13506993	9.412
1	13508227	10.517
1	13509237	10.02
1	13510474	8.938
1	13511991	9.694
1	13513025	9.609
1	13514240	8.812
1	13514474	9.65
1	13514597	8.754
1	13515646	11.489
1	13516509	10.89
1	13517189	10.198
1	13519707	9.455
1	13521331	10.123
1	13523095	8.446
1	13523975	9.69
1	13524533	9.451
1	13525581	9.995
1	13527090	9.757
1	13532754	10.108
1	13537040	9.179
1	13539090	10.248
1	13540290	7.785
1	13542215	6.058
1	13542249	6.419
1	13667696	5.191
1	13668783	5.06
1	13671657	5.268
1	13671705	5.537
1	13672106	5.92
1	13673514	6.415
1	13675011	6.109
1	13675144	5.906
1	13726408	5.291
1	13726601	5.301
1	13728260	5.904
1	13728554	5.944
1	13730077	6.6
1	13730448	6.933
1	13730729	5.981
1	13733234	5.698
1	13733677	5.718
1	13737667	6.131
1	13757752	5.317
1	13775534	5.041
1	13777956	5.055
1	13780474	5.468
1	13780648	5.66
1	13786554	5.065
1	13788309	5.237
1	13788925	5.076
1	13789782	5.078
1	14161886	5.751
1	14166678	6.271
1	14167279	6.861
1	14171055	5.776
1	14172473	5.028
1	14359393	5.394
1	14361037	5.587
1	14364342	5.474
1	14365381	5.441
1	14365539	5.665
1	14365871	5.136
1	14366031	5.304
1	14366742	5.844
1	14367581	5.595
1	14458798	5.071
1	14460803	6.348
1	14460918	5.978
1	14461010	5.046
1	14461516	5.697
1	14463349	5.227
1	14534623	5.721
1	14534999	5.886
1	14535310	5.829
1	14536189	6.502
1	14536244	6.565
1	14536977	5.533
1	14537073	5.832
1	14537301	6.404
1	14537595	6.844
1	14539657	6.951
1	14541128	7.672
1	14541289	7.547
1	14620063	5.858
1	14621076	5.986
1	14625465	6.869
1	14625582	6.933
1	14627452	7.624
1	14630145	8.854
1	14630251	6.613
1	14630830	9.887
1	14636023	8.049
1	14639052	5.995
1	14641890	5.571
1	14652251	5.09
1	14652469	5.752
1	14653926	6.01
1	14654002	5.912
1	14656150	5.994
1	14656193	5.36
1	14660100	5.295
1	14690286	5.059
1	14713625	5.311
1	14714050	6.693
1	14716499	8.993
1	14719949	9.617
1	14722149	9.096
1	14723944	7.328
1	14724467	8.042
1	14725052	7.261
1	14726668	8.548
1	14727593	8.6
1	14730470	7.823
1	14733967	7.808
1	14734371	7.69
1	14735145	7.285
1	14735796	6.197
1	14735844	5.396
1	14737916	5.068
1	14738225	5.193
1	14740293	5.045
1	14741112	5.178
1	15035956	5.06
1	15038196	5.189
1	15039280	5.503
1	15043610	5.521
1	15044233	5.62
1	15045156	5.03
1	15045452	6.635
1	15045673	7.38
1	15048114	6.646
1	15050047	6.157
1	15050323	6.214
1	15051994	7.472
1	15055738	6.8
1	15060954	7.96
1	15062265	7.198
1	15063167	7.722
1	15065573	6.768
1	15066106	6.709
1	15066361	7.835
1	15067594	8.507
1	15067899	8.664
1	15068425	8.061
1	15069012	8.038
1	15069850	8.056
1	15071509	8.08
1	15072473	9.193
1	15072995	8.906
1	15074481	9.818
1	15074642	9.539
1	15076185	8.984
1	15077223	8.104
1	15080053	8.9
1	15083628	8.839
1	15084373	9.07
1	15087595	9.06
1	15089246	8.944
1	15095261	8.872
1	15096690	8.409
1	15099107	9.039
1	15099292	9.187
1	15100957	7.158
1	15111061	6.683
1	15111239	6.898
1	15113226	6.294
1	15113758	6.356
1	15114767	5.969
1	15115344	5.109
1	15115922	5.531
1	15116353	5.58
1	15118260	5.86
1	15118630	5.72
1	15119016	7.529
1	15120950	7.823
1	15121928	7.892
1	15122101	6.089
1	15123159	5.863
1	15124540	6.484
1	15125082	7.608
1	15125118	8.973
1	15125716	9.284
1	15125748	7.422
1	15126065	7.863
1	15126775	6.407
1	15128047	6.741
1	15128635	8.373
1	15130771	6.722
1	15139738	8.363
1	15140527	8.917
1	15141523	8.609
1	15149795	7.472
1	15150722	7.109
1	15153930	7.766
1	15154357	7.752
1	15155668	7.577
1	15155814	5.941
1	15166335	7.717
1	15168287	7.397
1	15170305	6.806
1	15170905	7.714
1	15173465	5.938
1	15173617	5.81
1	15173889	7.561
1	15174663	5.694
1	15177564	7.534
1	15181436	7.527
1	15183505	6.525
1	15184261	7.438
1	15186854	6.579
1	15187862	6.566
1	15190216	6.966
1	15191136	6.794
1	15191377	7.872
1	15191417	7.745
1	15191567	7.135
1	15192934	7.835
1	15193132	7.728
1	15196088	7.726
1	15199006	6.184
1	15199058	6.843
1	15203007	7.033
1	15204479	7.905
1	15205944	6.658
1	15207461	7.735
1	15207663	7.815
1	15207824	7.833
1	15208235	5.347
1	15209788	5.025
1	15211809	5.327
1	15212105	5.936
1	15214701	5.453
1	15215571	5.411
1	15217855	5.492
1	15221073	6.224
1	15224225	6.227
1	15224735	8.081
1	15228058	8.184
1	15228466	8.131
1	15230439	5.361
1	15298200	5.041
1	15298311	5.036
1	15409557	5.204
1	15418698	5.204
1	15427379	5.175
1	15429164	5.142
1	15429590	5.355
1	15438589	5.135
1	15438899	5.37
1	15442318	5.927
1	15442738	5.363
1	15447287	5.6
1	15942669	5.123
1	15946963	5.515
1	15948499	5.126
1	15950186	5.437
1	15955452	5.194
1	15955784	5.302
1	15966241	7.86
1	15966684	6.38
1	15967547	6.351
1	15968227	6.127
1	15968434	6.734
1	15968852	6.929
1	15969438	6.929
1	16083683	5.385
1	16086482	5.85
1	16089140	7.306
1	16090184	7.587
1	16091249	6.575
1	16093214	7.339
1	16094384	6.954
1	16094894	6.507
1	16095897	6.391
1	16096007	6.371
1	16096128	6.631
1	16097235	5.316
1	16098718	6.637
1	16099720	6.777
1	16100012	6.642
1	16101485	5.156
1	16102598	6.1
1	16102676	6.064
1	16102994	6.06
1	16103066	5.374
1	16103231	6.08
1	16103502	6.744
1	16105867	6.335
1	16106069	5.09
1	16219768	5.055
1	16220365	5.322
1	16221156	5.364
1	16225206	5.251
1	16227570	5.098
1	16230463	5.12
1	17202610	5.493
1	17469324	6.576
1	17469551	5.589
1	17472304	5.694
1	17473780	5.295
1	17475377	5.241
1	17476934	5.231
1	17480097	5.002
1	17480903	5.123
1	17485798	5.075
1	17490054	5.157
1	17490247	5.339
1	17491828	5.752
1	17492612	5.988
1	17493761	5.939
1	17496163	5.282
1	17508991	5.423
1	17515343	5.007
1	17529270	5.79
1	17530671	5.759
1	17532876	5.863
1	17532949	5.856
1	17533414	5.449
1	17536293	5.494
1	17539286	5.387
1	17540170	5.326
1	17540574	5.427
1	17542524	5.388
1	17542754	5.788
1	17544486	6.427
1	17544995	6.543
1	17547523	6.64
1	17549768	6.596
1	17551379	5.666
1	17552451	6.63
1	17556507	6.729
1	17557863	5.807
1	17558632	6.512
1	17560473	5.576
1	17561955	5.904
1	17563207	5.568
1	17565256	5.558
1	17566398	5.48
1	17569062	5.724
1	17569100	6.027
1	17572075	5.747
1	17572196	5.669
1	17572233	5.757
1	17572818	5.567
1	17579324	5.663
1	17580834	5.596
1	17581538	5.725
1	17582001	6.082
1	17582591	5.894
1	17583011	5.645
1	17584312	5.423
1	17635151	5.771
1	17636614	5.944
1	17636966	5.357
1	17638936	5.954
1	17639385	5.849
1	17641520	7.312
1	17646832	7.813
1	17647435	7.685
1	17647978	7.768
1	17648579	7.288
1	17650495	7.298
1	17650670	7.539
1	17651435	7.52
1	17651583	7.211
1	17652148	7.721
1	17653939	7.753
1	17654010	7.506
1	17654288	7.595
1	17654573	7.663
1	17654804	7.536
1	17655388	7.661
1	17656350	7.829
1	17658547	7.043
1	17659718	8.121
1	17661171	7.889
1	17663107	7.352
1	17666299	8.115
1	17666946	8.041
1	17675751	6.81
1	17678129	6.758
1	17679262	6.738
1	17687776	6.534
1	17688171	6.167
1	17691572	6.491
1	17692885	6.132
1	17693234	6.477
1	17696350	6.27
1	17697248	6.296
1	17700096	6.219
1	17701189	6.026
1	17701497	6.09
1	17701767	6.427
1	17702963	5.626
1	17703976	6.072
1	17708475	5.972
1	17711232	5.152
1	17711403	5.243
1	17711497	5.166
1	17711988	5.392
1	17713099	5.638
1	17713538	5.884
1	17716310	6.052
1	17716373	6.107
1	17716753	5.966
1	17717324	6.164
1	17718206	6.049
1	17718824	6.181
1	17724390	7.434
1	17726170	6.631
1	17727171	6.596
1	17727570	7.107
1	17727914	7.864
1	17728426	7.444
1	17729442	8.088
1	17785663	5.185
1	17862562	5.526
1	17865632	6.004
1	17865994	5.342
1	18240961	5.3
1	18241117	5.645
1	18254641	6.147
1	18262044	6.096
1	18263298	7.109
1	18263376	6.528
1	18265857	6.537
1	18267153	6.208
1	18267646	7.173
1	18268302	6.657
1	18269420	7.122
1	18270253	7.091
1	18270723	6.691
1	18270782	7.022
1	18271290	5.866
1	18272467	6.305
1	18273961	5.223
1	18278147	5.747
1	18279934	5.921
1	18281861	5.818
1	18517043	5.326
1	18527928	5.105
1	18536216	5.228
1	18538085	5.247
1	18538447	5.238
1	18545150	5.528
1	18677781	5.266
1	18684065	5.209
1	18684739	5.222
1	18685326	5.415
1	18685359	5.386
1	18753125	6.644
1	18753173	7.867
1	18754298	8.632
1	18754497	8.506
1	18755170	6.502
1	18755914	6.702
1	18756348	6.169
1	18756796	6.417
1	18839196	5.113
1	18871039	5.134
1	19303828	5.083
1	19310609	5.432
1	19318463	5.072
1	19319523	5.993
1	19320323	5.248
1	19320977	5.643
1	19323131	5.108
1	19325210	6.242
1	19325548	5.08
1	19325929	6.559
1	19326571	6.759
1	19327907	6.517
1	19328169	6.563
1	19329789	5.537
1	19331191	6.725
1	19331900	5.955
1	19336346	6.415
1	19336403	5.78
1	19336469	7.524
1	19341608	6.268
1	19341763	7.169
1	19349939	6.89
1	19351619	7.886
1	19353252	7.092
1	19353834	6.898
1	19353941	7.464
1	19356218	7.354
1	19357327	7.408
1	19358417	6.028
1	19358771	5.628
1	19360191	5.739
1	19438840	7.028
1	19440415	7.126
1	19443525	7.334
1	19444445	7.639
1	19445502	7.509
1	19445720	7.507
1	19447575	6.772
1	19447730	6.896
1	19449721	9.349
1	19452716	9.261
1	19452982	9.847
1	19454066	10.683
1	19455358	10.881
1	19455489	10.683
1	19456623	10.695
1	19458986	8.963
1	19460505	9.241
1	19461763	10.581
1	19464837	9.347
1	19467002	10.14
1	19469719	9.758
1	19469784	7.092
1	19472536	7.107
1	19474118	6.36
1	19474759	5.728
1	19476271	6.87
1	19476522	5.967
1	19477359	6.495
1	19477876	6.136
1	19478256	6.45
1	19480052	6.157
1	19482976	5.6
1	19483041	6.2
1	19483207	6.098
1	19486320	5.546
1	19486720	5.083
1	19486797	6.163
1	19489182	6.225
1	19489877	6.535
1	19491927	5.936
1	19494317	6.468
1	19494686	7.287
1	19500509	8.193
1	19500642	7.205
1	19501279	8.872
1	19502912	7.918
1	19505024	7.569
1	19506419	7.229
1	19507663	6.972
1	19510086	7.016
1	19510889	7.085
1	19511021	7.41
1	19513146	7.387
1	19513357	7.356
1	19514663	7.213
1	19516911	6.831
1	19519227	6.712
1	19521580	6.225
1	19523003	6.243
1	19525714	6.153
1	19528479	6.116
1	19530901	6.082
1	19533637	6.066
1	19534367	5.635
1	19534467	5.143
1	20355862	5.313
1	20356429	5.096
1	20828846	5.087
1	20841001	5.059
1	20842935	5.064
1	20843185	5.009
1	20843886	5.572
1	20847560	5.615
1	20848874	5.26
1	20851789	5.011
1	20851929	5.521
1	20854051	5.68
1	20855610	5.162
1	20856075	5.74
1	20857829	6.034
1	20858010	5.329
1	20862228	6.178
1	20862561	5.365
1	20863419	5.25
1	20865341	5.334
1	20866379	5.398
1	20866506	6.01
1	20868996	5.224
1	20874130	5.33
1	20875092	5.995
1	20875365	5.222
1	20876512	5.427
1	20879230	5.321
1	20879704	5.406
1	20881926	5.513
1	20882519	5.449
1	20882571	5.519
1	20884083	5.549
1	20884435	5.446
1	20884841	5.551
1	20886418	5.505
1	20901597	5.222
1	20936045	5.104
1	20944696	5.434
1	20966333	5.124
1	21012010	5.399
1	21016774	5.057
1	21763866	5.202
1	21763990	5.176
1	21765602	5.313
1	21766453	5.289
1	21769637	5.134
1	21909897	5.333
1	23136803	5.35
1	23140817	5.351
1	23142020	5.241
1	23142563	5.166
1	23143441	5.426
1	24049810	5.098
1	24050846	5.346
1	24050956	5.205
1	24051198	5.562
1	24051299	5.916
1	24051914	5.574
1	24053342	5.561
1	24054894	5.056
1	24057609	5.377
1	24059259	5.416
1	24063027	5.926
1	24065414	5.77
1	24065823	5.342
1	24070663	5.597
1	24074161	5.637
1	24081354	5.049
1	24082159	5.005
1	24084168	5.294
1	24085147	5.214
1	24270217	5.459
1	24270754	6.641
1	24271426	7.662
1	24272193	7.644
1	24272576	7.69
1	24273925	7.187
1	24276875	6.709
1	24277773	7.34
1	24278898	6.81
1	24279162	7.024
1	24286575	6.359
1	24287526	6.808
1	24290006	6.669
1	24290399	6.822
1	24290588	6.594
1	24295767	6.078
1	24391468	7.086
1	24393120	5.092
1	24393473	5.25
1	24393782	5.423
1	24395338	5.427
1	24409236	5.057
1	24410330	5.24
1	24411414	5.345
1	24413831	5.311
1	24419996	5.916
1	24420114	5.952
1	24421908	6.042
1	24426360	5.84
1	24426758	5.871
1	24427375	5.918
1	24427934	5.888
1	24433500	5.193
1	24434870	5.771
1	24438174	5.226
1	24439012	5.303
1	24440171	5.913
1	24441319	5.302
1	24441450	5.074
1	24448078	5.345
1	24450488	5.764
1	24451005	6.788
1	24451250	6.612
1	24453848	5.418
1	24457818	7.041
1	24458368	6.849
1	24458761	7.309
1	24459660	5.994
1	24460749	5.451
1	24461259	5.866
1	24461388	5.327
1	24466099	5.918
1	24466448	5.687
1	24468618	5.783
1	24468729	5.924
1	24468972	6.574
1	24469026	5.329
1	24475273	5.968
1	24478631	5.961
1	24481660	5.03
1	24484772	9.7
1	24486336	10.253
1	24491121	10.128
1	24492692	9.107
1	24494922	8.873
1	24497209	9.011
1	24498169	8.594
1	24500676	8.438
1	24501130	9.345
1	24502080	9.6
1	24506088	10.373
1	24509217	9.762
1	24509482	9.264
1	24510010	10.055
1	24513166	10.737
1	24513515	9.708
1	24513814	9.242
1	24514564	10.75
1	24515591	9.792
1	24515728	9.874
1	24518348	10.906
1	24518926	10.64
1	24519450	9.878
1	24520804	10.835
1	24521923	12.102
1	24521990	12.27
1	24522145	11.991
1	24528730	8.976
1	24529883	8.405
1	24531251	7.254
1	24531946	8.76
1	24533395	7.916
1	24533714	7.694
1	24534429	6.906
1	24536097	7.688
1	24536160	7.48
1	24541507	6.375
1	24544716	6.017
1	24545022	6.37
1	24545366	5.353
1	24545588	5.131
1	24548001	5.511
1	24550079	5.676
1	24552015	5.48
1	24552216	5.274
1	24557370	5.263
1	24558413	5.682
1	24558499	6.381
1	24558888	6.685
1	24559732	5.672
1	24560350	6.799
1	24560963	6.749
1	24561309	7.01
1	24561603	5.842
1	24562013	11.742
1	24565232	10.828
1	24566419	12.768
1	24566734	12.533
1	24567523	12.894
1	24569654	13.017
1	24572053	14.629
1	24582096	14.401
1	24582542	12.08
1	24584216	13.965
1	24584522	13.8
1	24585497	14.48
1	24586102	13.89
1	24587281	14.873
1	24587547	14.869
1	24588731	13.41
1	24588948	13.756
1	24590353	15.464
1	24591193	13.755
1	24591594	15.721
1	24591787	15.615
1	24593935	16.029
1	24594493	14.166
1	24603565	5.083
1	24603850	5.482
1	24603964	5.51
1	24605589	5.04
1	24605667	5.594
1	24605918	5.476
1	24606228	5.031
1	24606873	5.031
1	24607024	5.038
1	24607113	5.266
1	24633109	5.575
1	24635032	5.273
1	24635501	5.966
1	24635536	6.705
1	24635760	7.073
1	24638031	6.061
1	24638259	6.595
1	24638832	7.167
1	24638894	6.672
1	24639696	6.642
1	24640691	5.819
1	24641427	6.079
1	24650338	5.605
1	24651532	5.384
1	24651909	6.543
1	24652540	6.99
1	24653875	7.538
1	24656558	7.37
1	24657956	7.003
1	24658059	7.015
1	24661047	6.548
1	24661431	7.874
1	24661713	6.94
1	24664261	6.798
1	24669117	7.859
1	24670308	7.782
1	24670574	8.492
1	24678044	8.327
1	24678106	7.548
1	24678853	7.458
1	24679453	8.207
1	24680961	7.754
1	24683026	8.469
1	24683378	8.111
1	24686597	8.797
1	24688236	6.001
1	24688921	8.376
1	24691001	8.327
1	24691035	7.877
1	24691813	6.595
1	24693594	7.084
1	24693622	7.531
1	24703135	6.806
1	24705112	7.179
1	24705665	7.066
1	24706748	7.109
1	24708549	7.122
1	24708882	6.922
1	24710294	7.389
1	24713093	6.697
1	24713980	6.916
1	24714291	6.804
1	24714439	7.312
1	24716711	7.785
1	24717166	7.834
1	24717296	7.431
1	24717714	6.98
1	24721477	7.043
1	24721824	7.241
1	24739482	7.516
1	24741938	8.958
1	24745523	9.598
1	24745717	12.149
1	24747081	10.823
1	24748288	12.504
1	24753203	12.883
1	24754233	11.298
1	24754470	11.534
1	24754783	12.032
1	24756786	11.083
1	24757270	10.634
1	24758094	11.943
1	24758650	10.577
1	24758713	11.214
1	24760232	11.313
1	24761643	10.531
1	24763266	9.783
1	24763553	10.635
1	24764583	10.492
1	24766110	10.705
[truncated: 108,141 more rows]

## Sheet: F. WorkingCow-hapQTL
Supplementary Table 3F. Significant ROI identified by hapQTL in the Working Cow QH subpopulation.
Chromosome Number	SNP position (bp)	Bayes Factor value
1	188092	6.296
1	188790	7.963
1	189439	5.996
1	196576	6.835
1	198102	7.195
1	198262	7.931
1	199788	7.966
1	202322	8
1	205126	7.536
1	206114	7.518
1	207875	6.225
1	208181	7.455
1	208842	6.537
1	1474727	6.154
1	1475280	5.167
1	1477604	6.788
1	1477713	6.362
1	1809193	5.109
1	1810352	5.419
1	1811068	5.496
1	1811529	5.362
1	1813098	5.653
1	1813433	5.546
1	1814871	5.225
1	1818813	5.475
1	1822323	5.928
1	1822543	5.328
1	1822754	5.317
1	1825243	5.045
1	1827996	5.313
1	1829869	5.445
1	1831823	5.482
1	1831899	5.539
1	1834097	6.234
1	1834162	5.53
1	1834197	5.16
1	1835406	5.54
1	1835440	5.329
1	1835656	5.178
1	1835817	5.247
1	1836318	5.524
1	1836347	5.426
1	1839853	5.28
1	1849125	5.002
1	2302446	6.522
1	2473894	5.128
1	2474455	5.392
1	2475409	6.491
1	2476224	5.505
1	2478720	5.252
1	2480651	5.389
1	2482562	5.108
1	2483877	5.534
1	2485319	5.644
1	2485434	5.771
1	2486389	5.871
1	2486451	5.515
1	2486664	5.93
1	2486930	5.449
1	2491506	6.202
1	2493213	5.747
1	2494648	5.564
1	2495139	5.027
1	2499447	5.531
1	2500904	5.628
1	2501087	5.168
1	2502738	5.415
1	2509397	5.066
1	2511603	5.053
1	2747545	6.196
1	2747809	6.533
1	2748554	7.121
1	2750014	6.655
1	2753761	6.949
1	2756156	6.361
1	2757655	6.907
1	2757991	7.286
1	2760596	7.243
1	2764738	7.108
1	2768890	7.264
1	2770543	10.366
1	2771265	10.754
1	2771683	8.93
1	2772889	8.702
1	2775034	7.241
1	2775391	8.799
1	2775563	8.36
1	2780819	8.402
1	2780960	9.981
1	2784069	9.518
1	2784722	8.093
1	2785110	8.048
1	2785203	8.069
1	2785449	9.843
1	2785759	7.991
1	2788088	10.207
1	2788206	11.403
1	2789811	10.03
1	2792984	15.451
1	2793026	16.733
1	2793249	13.445
1	2793509	11.086
1	2794768	15.076
1	2796052	16.329
1	2797896	13.613
1	2798612	11.832
1	2802951	16.599
1	2804764	13.937
1	2805416	14.326
1	2812915	5.068
1	2818743	5.344
1	2827456	5.301
1	2827599	5.225
1	2831685	5.237
1	2831991	5.259
1	2832914	5.363
1	3191684	5.53
1	3191970	5.004
1	3192027	5.254
1	3194729	5.562
1	3195065	6.05
1	3196108	6.195
1	3196411	6.289
1	3196608	6.851
1	3196647	6.254
1	3197121	5.697
1	3197708	5.056
1	3211385	5.273
1	3212739	5.817
1	3216526	5.703
1	3219018	5.307
1	3219227	5.223
1	3238269	5.014
1	3240767	5.089
1	3241589	5.202
1	3247668	5.066
1	3248331	5.126
1	3248633	5.252
1	3253669	5.079
1	3254758	5.146
1	3257020	5.188
1	3276642	5.601
1	3279798	5.743
1	3286362	5.195
1	3288004	5.374
1	3288560	5.139
1	3295063	5.021
1	3310425	5.325
1	3311216	5.06
1	3311622	5.803
1	3313847	5.895
1	3314401	5.739
1	3315369	6.144
1	3315797	5.981
1	3316177	5.984
1	3319798	5.728
1	3320486	5.806
1	3322882	5.963
1	3323664	5.905
1	3323904	5.601
1	3327943	6.311
1	3331113	6.346
1	3331158	7.113
1	3331581	6.523
1	3332403	6.496
1	3333183	6.793
1	3333794	6.616
1	3334417	7.206
1	3335327	7.057
1	3336798	6.332
1	3337847	7.514
1	3341242	8.105
1	3343360	7.376
1	3344491	7.489
1	3466604	5.509
1	3469399	5.183
1	3469446	6.473
1	3477007	8.054
1	3479530	8.295
1	3480010	11.691
1	3483555	11.699
1	3484310	11.085
1	3485758	11.151
1	3486498	11.22
1	3488167	9.955
1	3489328	9.589
1	3542805	6.724
1	3542846	8.915
1	3547435	8.295
1	3548254	9.578
1	3548846	8.695
1	3553634	8.756
1	3555389	8.064
1	3557949	6.896
1	3558245	6.718
1	3560987	6.803
1	3561538	5.94
1	3564302	5.346
1	3654856	5.313
1	3656917	5.537
1	3660713	5
1	3660777	5.275
1	4072526	5.521
1	4075464	5.663
1	4336289	7.198
1	4337459	6.474
1	4338238	6.12
1	4341274	6.545
1	4346522	5.228
1	4346691	6.24
1	4346790	5.367
1	4347115	6.427
1	4349838	5.346
1	4355371	5.146
1	4363210	5.195
1	4365125	5.624
1	4365273	5.516
1	4659908	7.201
1	4663023	6.886
1	4663598	7.224
1	4664551	6.845
1	4664706	6.821
1	4664779	6.777
1	4665292	6.838
1	4665780	7.022
1	4667747	6.418
1	4959016	6.165
1	4959242	6.313
1	4960269	6.383
1	4960802	6.201
1	4961206	5.527
1	4961733	5.627
1	4962638	5.437
1	4965165	6.353
1	4965670	6.218
1	4965893	6.415
1	4967311	6.359
1	4967799	6.281
1	4981283	5.114
1	4991055	5.445
1	4991606	5.39
1	4992960	5.009
1	5032909	5.015
1	5037633	5.308
1	5039417	5.049
1	5039476	5.614
1	5044111	5.862
1	5044314	5.823
1	5045614	5.533
1	5045770	5.096
1	5071028	5.992
1	5071544	6.426
1	5071885	6.364
1	5072410	6.106
1	5074422	6.432
1	5074647	6.025
1	5076633	5.529
1	5076751	6.442
1	5077505	6.668
1	5078026	6.498
1	5079423	7.061
1	5080281	7.079
1	5080403	7.183
1	5082326	6.964
1	5082940	6.34
1	5085726	5.911
1	5087453	6.373
1	5087630	6.043
1	5088417	6.661
1	5088570	6.022
1	5089578	6.654
1	5090376	6.395
1	5090744	6.353
1	5096917	6.7
1	5098297	6.76
1	5103585	6.683
1	5104068	6.321
1	5106467	6.91
1	5107852	7.146
1	5108463	6.729
1	5108690	7.386
1	5109048	7.319
1	5120270	6.868
1	5121302	6.392
1	5124363	6.961
1	5124508	6.87
1	5124684	7.01
1	5127030	6.522
1	5128923	6.685
1	5130686	5.987
1	5135683	5.902
1	5137103	5.833
1	5137192	5.94
1	5137406	6.014
1	5137686	6.028
1	5138096	5.97
1	5142877	5.627
1	5143035	5.296
1	5144397	5.165
1	5145591	5.014
1	5146123	5.039
1	5629956	5.02
1	5631443	6.359
1	5640046	5.877
1	5644587	5.77
1	5649300	5.583
1	5649534	6.095
1	5652483	6.618
1	5652847	5.823
1	5653441	6.854
1	5653593	6.964
1	5654354	5.778
1	5654592	5.259
1	6063915	5.073
1	6064798	5.866
1	6066844	6.28
1	6066866	6.37
1	6069698	5.606
1	6070933	6.078
1	6072930	6.024
1	6073067	6.363
1	6075628	6.706
1	6076098	6.26
1	6078073	6.386
1	6078585	6.616
1	6079105	6.712
1	6079602	6.1
1	6083162	6.305
1	6088168	6.229
1	6089786	6.861
1	6093009	7.038
1	6093271	6.465
1	6094639	7.241
1	6094913	6.542
1	6098197	6.897
1	6098251	6.821
1	6098452	6.163
1	6098568	6.183
1	6099630	5.644
1	6100655	6.197
1	6100709	5.572
1	6101529	5.716
1	6103160	5.196
1	6103516	5.784
1	6105115	5.788
1	6105875	5.311
1	6106173	5.137
1	6106773	5.185
1	6123909	5.013
1	6126132	5.408
1	6127184	5.85
1	6127558	5.325
1	6127988	5.779
1	6128271	6.213
1	6128451	6.474
1	6129320	6.671
1	6129378	7.081
1	6130579	6.483
1	6132979	9.666
1	6135707	9.509
1	6135787	6.856
1	6137138	5.978
1	6138322	5.56
1	6141092	5.425
1	6141343	6.351
1	6141809	5.836
1	6148391	6.037
1	6153021	6.218
1	6153196	6.643
1	6153514	6.724
1	6154606	6.988
1	6156697	7.667
1	6157056	8.116
1	6159313	7.659
1	6160032	6.485
1	6162299	6.943
1	6162332	6.925
1	6163217	6.214
1	6164146	6.985
1	6164666	6.607
1	6165077	6.027
1	6166913	7.301
1	6166999	7.071
1	6168760	6.517
1	6169632	6.772
1	6170873	5.181
1	6170923	5.311
1	6171419	5.531
1	6172972	5.317
1	6173363	5.33
1	6174751	5.548
1	6174784	5.669
1	6177157	5.202
1	6177362	5.377
1	6177589	5.294
1	6178707	6.087
1	6180325	6.055
1	6181032	6.057
1	6182221	6.147
1	6182322	5.478
1	6182351	6.252
1	6182699	5.489
1	6183271	6.293
1	6185665	6.288
1	6187079	6.159
1	6194556	6.213
1	6200192	5.499
1	6201540	6.257
1	6203252	5.516
1	6205540	6.192
1	6205890	5.637
1	6205932	5.099
1	6236395	5.338
1	6237126	5.305
1	6237467	5.649
1	6240795	5.791
1	6242009	5.704
1	6242742	5.88
1	6243406	5.996
1	6243943	6.015
1	6244139	6.084
1	6245948	5.957
1	6247186	6.129
1	6247413	5.98
1	6247816	6.278
1	6248258	5.84
1	6249060	6.31
1	6249095	6.589
1	6249179	7.14
1	6249667	5.898
1	6249987	5.93
1	6250320	5.801
1	6250341	5.685
1	6765912	5.62
1	6766570	5.326
1	6767138	5.203
1	6767593	5.823
1	6769577	5.106
1	6787225	5.359
1	6789271	6.6
1	6789314	7.066
1	6789329	11.332
1	6789361	11.372
1	6790179	11.441
1	6790690	11.506
1	6791056	11.367
1	6791157	11.266
1	6793679	11.176
1	6794901	11.305
1	6798706	11.479
1	6801020	6.668
1	6805361	6.261
1	6807710	6.339
1	6808668	6.393
1	6810202	5.933
1	6810327	7.934
1	6813717	6.795
1	6813865	6.506
1	6815688	6.417
1	6816060	5.54
1	6816135	5.905
1	6817303	6.121
1	6817348	6.267
1	6817486	6.609
1	6818017	6.732
1	6820732	6.37
1	6821290	7.161
1	6824179	7.517
1	6832939	6.22
1	6833044	7.782
1	6833410	7.31
1	6833913	6.204
1	6837428	7.801
1	6839457	7.799
1	6840429	6.246
1	6840944	7.62
1	6843129	7.885
1	6843204	8.056
1	6843438	7.666
1	6843501	6.683
1	6843677	6.724
1	6845479	7.831
1	6846816	7.179
1	6847682	7.338
1	6848438	6.957
1	6849866	6.955
1	6853520	6.63
1	6853774	5.115
1	6855645	6.422
1	6855785	5.482
1	6860210	5.005
1	6860867	5.888
1	6862050	6.348
1	6863514	5.411
1	6891403	6.916
1	6892716	6.293
1	6893197	6.463
1	6896229	5.693
1	6897009	6.755
1	6897049	6.975
1	6897389	6.902
1	6898047	6.173
1	6899393	6.006
1	6900897	6.056
1	6902202	5.682
1	6902276	7.469
1	6903462	7.177
1	6904226	7.178
1	6905117	7.078
1	6906474	7.064
1	6907258	6.931
1	6908983	6.781
1	6912774	6.91
1	6913610	6.897
1	6917450	6.888
1	6920606	6.925
1	6923733	8.203
1	6924453	8.468
1	6924616	8.518
1	6929532	8.564
1	6930010	8.564
1	6931545	8.671
1	6933975	8.748
1	6934624	8.563
1	6935192	8.815
1	6935327	10.148
1	6936598	10.085
1	6936916	9.924
1	6938988	9.833
1	6939181	8.745
1	6940268	5.832
1	8742391	6.114
1	8743456	5.548
1	8743763	6.681
1	8746724	6.701
1	10173203	5.196
1	10175632	5.228
1	10177952	5.061
1	10178394	5.483
1	10180059	5.674
1	10182736	5.099
1	10183361	5.121
1	10184484	5.516
1	10187102	5.342
1	10188417	5.343
1	10190584	6.559
1	10191522	6.799
1	10192235	5.342
1	10193112	8.098
1	10193455	7.467
1	10198509	6.581
1	10199762	6.637
1	10202629	6.242
1	10203815	6.966
1	10211071	5.338
1	10212062	5.579
1	10809741	5.742
1	10811478	5.612
1	10815449	5.537
1	10815623	5.596
1	10818256	5.588
1	10818559	5.655
1	10819365	5.547
1	10820572	5.596
1	10821455	5.41
1	10823392	5.243
1	10824409	5.776
1	10825465	5.416
1	10825636	5.442
1	10826124	5.557
1	10826678	5.052
1	10834780	5.354
1	10836770	5.201
1	10837704	5.47
1	10839239	5.822
1	10844143	5.508
1	10844288	5.435
1	10844882	5.308
1	10846172	5.226
1	10847095	5.738
1	10889594	5.188
1	11111537	5.426
1	11113752	5.34
1	11114562	5.375
1	11116581	5.605
1	11117482	5.178
1	11122848	5.846
1	11122981	5.613
1	11123034	5.565
1	11123485	6.116
1	11124056	5.513
1	11126097	5.496
1	11126374	5.179
1	11127293	5.672
1	11127651	5.408
1	11129490	5.488
1	11130161	7.08
1	11130537	7.437
1	11132414	7.509
1	11132793	8.523
1	11135491	8.283
1	11136753	8.831
1	11138340	8.257
1	11142690	8.234
1	11144438	7.796
1	11144830	8.948
1	11147403	9.028
1	11149457	8.655
1	11149724	9.059
1	11150709	9.016
1	11151423	8.932
1	11154592	8.983
1	11154673	9.292
1	11157596	9.01
1	11162588	8.979
1	11165662	8.806
1	11166120	8.762
1	11166164	8.363
1	11169404	7.975
1	11169436	8.647
1	11170491	8.32
1	11171279	8.213
1	11173948	7.468
1	11173995	7.444
1	11174075	7.443
1	11176189	6.963
1	11176500	7.385
1	11178206	7.513
1	11178550	7.342
1	11178803	7.418
1	11179238	7.459
1	11179448	7.192
1	11179753	7.01
1	11180747	7.549
1	11181296	7.266
1	11185004	7.393
1	11187481	7.937
1	11187571	8.21
1	11188179	8.562
1	11188248	8.524
1	11189401	7.972
1	11190535	8.449
1	11191716	8.289
1	11192072	8.322
1	11193200	8.155
1	11193942	6.264
1	11396574	5.385
1	11397968	11.603
1	11400162	10.182
1	11400334	10.699
1	11404398	10.116
1	11404984	8.947
1	11407630	7.719
1	11408328	7.537
1	11413054	7.695
1	11414583	7.801
1	11415721	7.76
1	11416309	7.939
1	11417995	7.747
1	11419826	7.892
1	11421468	7.764
1	11421894	7.993
1	11421921	8.501
1	11422393	8.403
1	11422486	8.717
1	11424106	8.275
1	11424587	8.212
1	11425357	8.535
1	11425712	8.06
1	11426034	8.193
1	11426066	8.657
1	11426099	8.763
1	11426919	8.723
1	11426969	8.93
1	11428291	9.425
1	11431492	10.099
1	11432458	10.208
1	11436433	9.437
1	11441822	10.006
1	11443548	9.686
1	11443985	9.787
1	11444178	9.369
1	11444748	8.478
1	11445325	8.585
1	11446460	9.142
1	11447003	9.244
1	11448945	8.782
1	11451130	9.158
1	11453993	8.289
1	11454188	9.438
1	11456451	9.473
1	11457452	8.866
1	11460514	8.85
1	11461155	9.242
1	11464677	9.253
1	11465029	9.544
1	11466300	9.88
1	11468184	9.187
1	11468769	9.627
1	11469798	10.153
1	11470781	13.124
1	11471417	12.68
1	11474384	8.239
1	11476279	8.338
1	11479344	8.358
1	11479446	9.063
1	11481758	9.386
1	11481818	8.53
1	11483660	7.952
1	11484348	10.117
1	11484803	9.872
1	11485456	8.679
1	11488191	8.952
1	11492023	9.889
1	11492829	9.993
1	11492874	10.227
1	11493381	9.444
1	11493528	9.121
1	11493603	10.028
1	11495315	9.248
1	11495950	10.633
1	11497389	10.586
1	11497511	10.767
1	11498180	12.582
1	11498659	11.587
1	11499004	12.147
1	11499377	11.542
1	11505440	12.108
1	11505642	11.501
1	11506630	11.291
1	11506747	10.647
1	11507118	10.285
1	11511931	11.161
1	11513955	11.518
1	11513995	11.446
1	11514371	11.524
1	11514931	12.536
1	11515993	11.331
1	11516474	12.676
1	11516530	11.374
1	11517201	12.047
1	11517367	12.041
1	11517434	13.116
1	11520178	12.516
1	11520712	12.564
1	11521840	14.166
1	11522564	14.605
1	11522650	14.771
1	11523593	14.675
1	11525634	14.509
1	11530097	14.889
1	11535044	14.712
1	11535969	15.146
1	11537201	13.902
1	11539920	15.617
1	11541803	15.61
1	11543297	14.738
1	11545105	12.213
1	11546037	11.417
1	11546989	11.084
1	11547705	9.151
1	11547838	5.939
1	11547874	5.467
1	11552933	5.402
1	11553557	5.771
1	11555746	5.802
1	11556297	5.909
1	11557462	6.162
1	11558748	5.964
1	11560715	5.826
1	11560787	6.003
1	11564476	5.853
1	11565061	6.471
1	11565362	6.723
1	11568568	5.953
1	11568723	5.721
1	11569155	5.83
1	11570920	5.574
1	11570980	6.146
1	11574212	7.085
1	11574827	6.829
1	11576623	7.607
1	11577635	7.328
1	11578061	7.173
1	11578387	6.922
1	11579741	7.158
1	11580243	6.179
1	11580394	8.161
1	11581708	6.971
1	11581797	8.054
1	11582960	7.916
1	11583416	7.967
1	11583690	7.082
1	11584360	7.099
1	11585311	6.721
1	11589041	7.592
1	11592348	6.523
1	11595342	7.04
1	11596819	7.149
1	11597444	7.046
1	11598037	6.925
1	11601578	7.381
1	11602553	6.796
1	11602594	7.45
1	11611108	7.663
1	11612866	7.225
1	11613155	7.609
1	11614200	7.621
1	11614416	7.76
1	11614884	7.689
1	11617496	5.401
1	11618273	5.394
1	11618871	5.181
1	11622312	5.845
1	11630252	5.14
1	11631121	5.563
1	11632290	5.459
1	11632550	5.605
1	11632759	5.331
1	11633853	5.417
1	11634574	5.129
1	11683005	5.134
1	11687922	5.023
1	11724625	7.8
1	11729159	7.468
1	11733452	7.182
1	11898278	5.063
1	11933027	5.904
1	11933977	5.77
1	11935815	5.908
1	11936540	5.557
1	11936842	6.059
1	11937928	6.14
1	11938094	7.449
1	11938195	7.714
1	11939434	7.691
1	11941649	7.879
1	11941967	7.526
1	11942533	6.868
1	11942835	6.377
1	11943275	5.706
1	11949681	5.457
1	11950274	5.233
1	11950839	5.907
1	11950861	5.873
1	11953914	5.434
1	11956644	5.376
1	11957715	5.8
1	11959487	5.696
1	11962107	5.772
1	11962864	6.051
1	11963875	7.045
1	11964769	6.714
1	11964875	6.986
1	11970249	6.764
1	11971441	6.335
1	11973330	7.823
1	11974587	7.578
1	11976773	7.377
1	11977245	6.528
1	11978220	6.968
1	11978467	7.191
1	11979006	7.226
1	11979503	7.016
1	11980928	6.526
1	11981153	6.413
1	11984127	6.946
1	11984962	7.264
1	11985100	6.951
1	11986694	6.9
1	11994801	6.769
1	11994848	6.548
1	11997250	6.004
1	11997317	5.848
1	12000817	6.053
1	12001231	5.645
1	12001446	5.496
1	12003442	5.78
1	12003554	5.362
1	12003646	5.511
1	12004702	5.936
1	12004829	5.64
1	12005219	5.566
1	12006288	5.055
1	12007641	5.019
1	12009163	5.844
1	12011868	5.451
1	12012047	5.409
1	12013446	5.172
1	12014718	5.507
1	12014974	5.516
1	12015186	5.408
1	12017899	6.596
1	12018374	6.594
1	12021080	6.65
1	12023409	5.798
1	12030817	6.294
1	12031637	5.98
1	12032385	5.269
1	12032676	6.123
1	12033779	6.172
1	12033814	6.049
1	12034652	6.039
1	12035033	6.008
1	12037702	5.972
1	12039441	5.475
1	12039618	5.444
1	12039809	5.807
1	12039831	5.199
1	12040696	5.77
1	12046353	5.786
1	12046679	5.923
1	12049140	5.269
1	12050785	5.375
1	12051213	5.598
1	12053738	5.104
1	12054301	5.97
1	12056642	5.243
1	12056924	5.649
1	12057336	5.853
1	12057813	6.02
1	12057931	6.153
1	12058482	5.716
1	12059019	5.661
1	12060435	6.116
1	12060906	5.624
1	12061703	5.936
1	12062291	5.926
1	12063522	5.364
1	12070921	5.374
1	12071351	5.204
1	12076279	7.374
1	12077289	6.362
1	12078572	6.813
1	12082345	6.827
1	12083180	7.157
1	12083928	6.558
1	12084215	6.186
1	12084294	6.762
1	12086118	6.175
1	12086227	5.246
1	12086369	6.271
1	12088719	6.948
1	12092434	6.945
1	12093017	6.95
1	12094526	6.991
1	12094793	7.109
1	12104586	6.936
1	12105437	6.357
1	12105909	6.611
1	12106632	5.72
1	12108694	6.298
1	12221860	5.611
1	12222908	6.197
1	12223089	5.694
1	12223376	6.171
1	12225495	5.766
1	12229153	5.179
1	12232035	5.063
1	12235805	5.18
1	12237716	5.427
1	12238510	5.475
1	12246800	5.867
1	12252238	7.09
1	12252982	8.202
1	12253520	8.253
1	12253618	9.3
1	12257194	9.369
1	12257763	9.207
1	12257853	8.308
1	12257963	9.03
1	12258596	9.202
1	12259117	9.226
1	12259691	6.832
1	12263057	7.333
1	12263801	7.626
1	12265862	7.548
1	12267406	7.257
1	12267544	6.517
1	12270888	6.163
1	12271729	8.12
1	12271875	8.456
1	12274819	8.258
1	12274866	8.579
1	12276961	9.314
1	12278533	7.934
1	12279560	6.385
1	12279772	6.669
1	12280190	6.566
1	12281373	5.842
1	12308814	7.198
1	12665297	5.273
1	12666675	5.226
1	12667576	5.307
1	12668718	5.356
1	13293391	7.578
1	13294951	7.86
1	13296041	6.851
1	13296882	6.987
1	13297559	6.128
1	13298977	6.886
1	13301054	8.329
1	13302567	7.4
1	13302747	7.347
1	13303617	6.936
1	13303954	6.536
1	13305579	6.405
1	13307144	6.281
1	13307237	5.67
1	13307480	6.157
1	13308352	5.387
1	13311071	6.119
1	13311826	5.556
1	13650866	5.16
1	13657166	5.012
1	13658472	5.01
1	13662340	5.346
1	13671657	5.454
1	13671705	6.483
1	13672106	6.586
1	13673514	6.649
1	13675011	5.825
1	13675144	6.056
1	13675486	6.041
1	13676529	8.137
1	13677058	8.189
1	13677190	8.258
1	13682364	8.028
1	13684392	6.149
1	13754891	5.018
1	13780648	5.043
1	14157855	6.494
1	14161886	6.078
1	14166678	6.256
1	14167279	6.611
1	14171055	6.301
1	14171979	5.396
1	14184126	5.004
1	14187876	5.593
1	14188097	7.084
1	14188443	6.173
1	14188659	5.984
1	14188779	5.573
1	14190442	5.163
1	14191229	5.172
1	14192319	5.456
1	14192843	5.399
1	14216847	5.557
1	14218341	5.002
1	14219136	5.917
1	14221906	6.243
1	14225240	6.164
1	14228539	6.211
1	14231355	5.883
1	14233155	6.28
1	14233295	6.712
1	14233523	6.826
1	14234913	6.042
1	14235611	6.846
1	14237144	6.23
1	14237175	7.183
1	14237780	6.008
1	14239357	6.891
1	14240136	7.032
1	14240293	6.339
1	14245213	5.853
1	14246067	5.22
1	14246994	6.39
1	14247289	6.457
1	14250775	6.493
1	14251880	6.503
1	14255088	6.164
1	14255455	5.558
1	14255841	6.276
1	14336514	5.79
1	14340137	7.832
1	14341902	8.664
1	14343861	8.714
1	14345950	8.343
1	14352526	9.475
1	14352746	7.499
1	14352934	5.611
1	14455725	5.205
1	14458798	5.223
1	14460803	5.58
1	14460918	5.203
1	14461516	5.114
1	14593868	5.217
1	14595183	5.114
1	14614515	6.072
1	14615565	5.093
1	14620063	5.711
1	14621076	5.9
1	14625465	6.225
1	14625582	5.666
1	14627452	5.648
1	14630145	6.583
1	14630830	8.348
1	14636023	8.875
1	14639052	6.599
1	14652251	5.083
1	14652469	5.291
1	14653926	5.483
1	14654002	5.42
1	14656150	5.483
1	14656193	5.266
1	14660100	5.269
1	15019767	5.014
1	15021967	6.012
1	15024302	5.996
1	15024676	5.585
1	15026025	6.154
1	15026957	5.311
1	15030597	5.751
1	15033561	5.477
1	15034938	5.706
1	15035956	5.757
1	15037826	5.581
1	15037966	5.439
1	15038196	5.905
1	15038753	5.748
1	15039280	6.619
1	15041248	6.13
1	15043610	6.779
1	15044233	6.784
1	15045156	6.036
1	15045384	5.829
1	15045452	5.65
1	15045673	6.236
1	15048114	5.712
1	15050047	5.313
1	15050323	5.414
1	15051994	6.044
1	15055738	5.77
1	15060954	6.196
1	15062265	5.759
1	15063167	6.28
1	15065573	5.34
1	15066106	5.377
1	15066361	5.878
1	15067594	6.295
1	15067899	6.314
1	15068425	6.089
1	15069012	6.163
1	15069850	6.738
1	15071509	6.546
1	15072473	6.777
1	15072995	6.34
1	15074481	6.107
1	15074642	6.281
1	15076185	5.622
1	15077223	5.864
1	15080053	5.67
1	15083628	5.533
1	15084373	5.981
1	15087595	5.811
1	15089246	5.711
1	15095261	5.513
1	15096690	5.545
1	15099107	5.733
1	15099292	6.221
1	15100957	6.315
1	15111061	5.775
1	15111239	6.083
1	15113226	5.419
1	15113758	5.931
1	15114767	5.387
1	15115344	6.44
1	15115922	5.45
1	15116353	6.805
1	15118260	8.155
1	15118630	7.633
1	15119016	9.111
1	15120950	7.968
1	15121928	6.459
1	15122101	7.664
1	15123159	5.223
1	15124540	7.167
1	15125082	6.548
1	15125118	7.208
1	15125716	7.241
1	15125748	6.159
1	15126065	7.732
1	15126775	7.006
1	15128047	6.114
1	15128635	7.527
1	15130771	6.029
1	15139738	6.963
1	15140527	7.95
1	15141523	7.877
1	15149795	6.799
1	15150722	7.107
1	15153930	8.527
1	15154357	8.284
1	15155668	8.553
1	15155814	7.227
1	15166335	8.742
1	15168287	8.517
1	15170305	7.938
1	15170905	8.98
1	15173465	7.191
1	15173617	7.199
1	15173889	9.292
1	15174663	6.971
1	15177564	9.103
1	15181436	9.119
1	15183505	8.069
1	15184261	9.169
1	15186854	8.022
1	15187862	7.835
1	15190216	8.513
1	15191136	7.505
1	15191377	7.673
1	15191417	5.916
1	15191567	5.854
1	15192934	6.22
1	15193132	6.385
1	15196088	5.388
1	15199058	5.226
1	15203007	5.142
1	15204479	5.798
1	15207461	5.857
1	15207663	5.678
1	15207824	5.119
1	15212105	5.447
1	15214701	5.483
1	15215571	5.051
1	15217855	5.416
1	15313839	5.566
1	15313903	7.567
1	15315740	5.758
1	15317092	5.079
1	15402821	5.107
1	15420967	5.062
1	15427379	5.352
1	15429164	5.172
1	15429590	5.355
1	15438589	5.263
1	15438899	5.353
1	15442318	6.126
1	15442738	5.373
1	15447287	5.689
1	15946963	5.186
1	15950186	5.272
1	15955452	5.091
1	15955784	5.096
1	15961580	5.148
1	15962074	5.69
1	15966241	5.627
1	15968434	5.492
1	15968852	5.392
1	15969438	5.36
1	16056538	5.124
1	16061751	5.426
1	16062767	5.391
1	16063746	5.856
1	16072201	5.096
1	16075849	5.475
1	16079026	5.027
1	16080644	6.402
1	16082776	6.364
1	16083409	6.226
1	16083683	5.85
1	16086482	5.464
1	16089140	6.657
1	16090184	6.839
1	16091249	6.001
1	16093214	6.969
1	16094384	6.532
1	16094894	7.661
1	16095897	7.695
1	16096007	7.386
1	16096128	6.806
1	16097235	5.77
1	16098718	6.01
1	16099720	6.175
1	16100012	6.788
1	16101485	5.797
1	16102598	6.87
1	16102676	6.903
1	16102994	6.737
1	16103066	6.276
1	16103231	6.963
1	16103502	7.165
1	16105867	6.791
1	16106069	5.462
1	16106646	5.186
1	16107605	5.615
1	16107657	5.418
1	16109835	5.708
1	16110041	5.76
1	16110353	5.098
1	16113384	5.604
1	16116627	5.842
1	16118721	5.486
1	16127756	5.506
1	16131173	5.479
1	16133784	5.159
1	16136748	5.297
1	16138238	5.476
1	16139489	5.616
1	16140631	6.586
1	16142315	6.445
1	16142768	5.844
1	16149494	6.886
1	16150463	6.788
1	16151248	5.848
1	16151895	5.683
1	16152725	5.241
1	16152949	6.51
1	16153285	5.796
1	16153476	5.152
1	16154012	5.775
1	16154685	6.213
1	16155114	5.574
1	16157097	6.049
1	16166446	5.915
1	16171188	5.765
1	16172371	5.42
1	16205023	5.295
1	16205669	5.7
1	16207193	6.138
1	16210887	5.689
1	16213883	6.612
1	16217441	5.365
1	16218808	6.853
1	16219335	5.355
1	16219768	6.417
1	16220365	6.31
1	16221156	6.268
1	16223129	5.26
1	16225206	6.329
1	16225360	5.182
1	16227570	5.744
1	16228148	5.382
1	16230463	5.761
1	16231941	5.216
1	16238505	5.48
1	17038800	5.052
1	17040463	5.39
1	17040600	6.005
1	17041648	5.045
1	17043770	5.661
1	17044972	6.139
1	17045942	6.38
1	17046131	7.033
1	17046174	7.632
1	17049335	7.147
1	17050708	7.674
1	17052425	6.977
1	17055246	7.316
1	17056805	6.375
1	17059203	6.558
1	17059741	5.862
1	17060245	6.5
1	17060337	5.822
1	17065907	6.047
1	17066699	5.769
1	17070558	6.37
1	17070989	5.809
1	17071097	5.466
1	17072657	6.494
1	17072807	6.536
1	17074398	5.947
1	17074441	6.944
1	17077316	6.418
1	17079852	6.111
1	17080362	6.701
1	17081592	7.092
1	17082380	6.682
1	17082543	7.127
1	17083385	7.064
1	17086966	6.4
1	17087625	7.167
1	17089746	5.364
1	17090738	6.425
1	17094685	6.311
1	17095803	5.584
1	17099284	5.361
1	17196109	5.297
1	17469324	8.056
1	17469551	7.417
1	17472304	6.913
1	17473780	6.558
1	17475377	6.189
1	17476780	6.239
1	17476934	5.795
1	17477073	5.967
1	17491828	5.279
1	17492070	5.12
1	17492612	5.55
1	17493761	6.129
1	17496163	6.355
1	17496300	5.09
1	17501307	5.562
1	17502044	5.064
1	17505212	5.077
1	17507635	5.085
1	17508475	5.777
1	17508776	5.228
1	17508991	5.093
1	17512219	5.733
1	17517036	5.532
1	17517999	5.756
1	17519395	5.023
1	17520149	5.293
1	17527631	5.295
1	17560473	5.412
1	17561955	5.621
1	17563207	5.42
1	17565256	5.395
1	17566398	5.384
1	17569100	5.089
1	17572818	5.017
1	17579324	5.027
1	17635151	6.541
1	17636614	6.48
1	17636966	6.3
1	17638936	6.369
1	17639385	6.203
1	17641520	6.24
1	17646832	6.465
1	17647435	6.184
1	17647978	6.303
1	17648579	6.028
1	17650495	5.915
1	17650670	6.096
1	17651435	6.065
1	17651583	5.893
1	17652148	5.978
1	17653939	5.921
1	17654010	5.921
1	17654288	5.825
1	17654573	5.642
1	17654804	5.757
1	17655388	5.709
1	17656350	5.637
1	17658547	5.134
1	17659718	5.767
1	17661171	5.679
1	17663107	5.178
1	17666299	5.788
1	17666946	5.786
1	17668444	5.692
1	17670498	5.235
1	17671762	5.651
1	17673104	5.276
1	17673134	5.542
1	17675751	5.915
1	17678129	5.909
1	17679262	5.86
1	17687776	5.545
1	17688171	5.417
1	17691572	5.653
1	17692885	5.074
1	17693234	5.495
1	17696350	5.324
1	17697248	5.23
1	17700096	5.152
1	17701767	5.297
1	17703976	5.141
1	17708475	5.095
1	17727914	5.311
1	17728426	5.055
1	17729442	5.941
1	17819623	5.219
1	17820841	5.03
1	17865994	5.224
1	17866500	5.044
1	18457586	5.007
1	18497065	5.178
1	18717084	5.016
1	18754497	5.018
1	18755914	5.427
1	18756796	5.391
1	18760278	5.028
1	19445720	7.675
1	19447575	9.038
1	19447730	9.5
1	19449721	10.733
1	19452716	9.64
1	19452982	10.04
1	19454066	10.015
1	19455358	10.295
1	19455489	9.847
1	19456623	10.179
1	19458986	9.053
1	19460505	9.395
1	19461763	10.418
1	19464837	9.586
1	19467002	9.791
1	19469719	9.628
1	19469784	9.882
1	19472536	9.914
1	19474118	9.488
1	19474759	8.604
1	19476271	9.902
1	19476522	8.989
1	19477359	9.207
1	19477876	8.76
1	19478256	9.074
1	19480052	8.855
1	19482976	8.602
1	19483041	9.094
1	19483207	9.299
1	19484431	10.055
1	19486320	9.785
1	19486720	9.318
1	19486797	9.694
1	19489182	9.7
1	19489877	9.703
1	19491927	9.793
1	19494317	9.933
1	19494686	10.131
1	19500509	9.828
1	19500642	10.054
1	19501279	10.878
1	19502912	10.131
1	19505024	10.353
1	19506419	10.648
1	19507663	10.476
1	19510086	10.326
1	19510889	10.049
1	19511021	9.991
1	19513146	10.097
1	19513357	10.075
1	19514663	9.236
1	19516911	8.083
1	19519227	8.083
1	19521580	6.891
1	19523003	6.528
1	19525714	6.623
1	19528479	6.612
1	19530901	6.591
1	19533637	5.379
1	19534367	5.283
1	19615655	5.003
1	19615874	5.113
1	19624382	5.743
1	19927261	5.166
1	19934466	5.25
1	19935629	5.108
1	19942569	5.026
1	19946819	5.148
1	19947129	5.312
1	19951562	5.378
1	19951875	5.192
1	20841001	5.081
1	20842935	5.179
1	20843185	5.295
1	20843886	5.65
1	20847560	5.599
1	20848874	5.01
1	20851929	5.982
1	20852719	5.555
1	20854051	6.78
1	20855610	6.144
1	20856075	7.073
1	20857829	6.699
1	20858010	6.084
1	20862228	6.843
1	20862561	6.432
1	20863419	6.066
1	20865341	6.473
1	20866379	6.542
1	20866506	6.757
1	20868996	6.102
1	20874130	6.48
1	20875092	7.212
1	20875365	6.163
1	20876512	6.254
1	20879230	6.466
1	20879704	6.561
1	20881926	6.254
1	20882519	6.552
1	20882571	6.167
1	20884083	6.227
1	20884435	6.444
1	20884841	6.141
1	20886418	6.09
1	20892807	5.662
1	20893856	5.526
1	20894972	5.496
1	20896405	5.345
1	20897687	5.678
1	20899581	5.344
1	20900930	5.463
1	20901428	5.316
1	20901487	5.631
1	20901597	6.196
1	20901690	5.553
1	20902599	5.042
1	20903197	5.679
1	20905283	5.237
1	20913697	5.117
1	20924099	5.148
1	20928035	5.024
1	20966333	5.121
1	20979250	5.363
1	20987593	5.168
1	20992465	5.723
1	20993285	5.808
1	20995884	6.155
1	20998538	6.197
1	21000124	5.624
1	21000610	5.354
1	21000664	5.262
1	21001846	5.614
1	21002485	5.515
1	21012010	5.202
1	21023688	5.042
1	21763866	5.076
1	21763990	5.065
1	21765602	5.208
1	21766453	5.163
1	21769637	5.246
1	21772522	5.083
1	21773204	5.853
1	21774662	5.899
1	21776228	6.064
1	21778369	5.908
1	21778620	5.443
1	21781918	5.785
1	21783045	5.701
1	21786499	5.655
1	21788628	5.592
1	21790893	5.411
1	21798912	5.376
1	21799812	5.739
1	21799976	5.359
1	21800762	5.329
1	21801004	5.385
1	22051489	5.013
1	22059508	7.884
1	22059945	7.372
1	22061070	7.504
1	22061319	7.4
1	22066306	7.373
1	22066685	6.225
1	22068145	6.061
1	22068812	6.145
1	22069518	6.097
1	22069551	6.321
1	22069649	6.217
1	22073608	6.611
1	23030262	5.722
1	23030334	5.961
1	23030676	5.245
1	23032848	6.675
1	23032945	5.792
1	23033355	5.706
1	23037423	6.354
1	23038733	5.749
1	23039398	5.088
1	23040125	5.785
1	23040623	5.612
1	23041224	5.677
1	23045689	5.349
1	23050105	6.393
1	23051737	6.033
1	23052026	7.532
1	23052485	7.132
1	23052636	6.872
1	23052941	7.328
1	23056188	7.844
1	23058675	7.535
1	23058709	7.738
1	23059469	8.588
1	23060063	6.197
1	23060115	6.312
1	23061332	5.566
1	23924650	6.819
1	23924887	6.682
1	23925424	6.966
1	23926306	6.741
1	23928570	6.686
1	23929399	6.754
1	23929427	6.851
1	23929826	6.161
1	23938046	5.743
1	23939405	5.549
1	23942870	5.774
1	23944083	6.153
1	23944149	6.101
1	23945556	6.076
1	23946445	6.245
1	23948618	6.058
1	23950184	5.105
1	23951384	6.01
1	23953253	6.761
1	23954652	7.186
1	23956141	6.611
1	23957645	6.62
1	23963650	5.488
1	23965006	5.982
1	24025707	5.277
1	24026752	5.186
1	24027765	5.198
1	24029706	5.971
1	24266058	5.643
1	24267774	5.683
1	24278898	5.076
1	24290006	5.46
1	24290399	5.606
1	24290588	5.519
1	24296105	5.302
1	24305205	5.08
1	24312221	5.083
1	24389817	6.033
1	24389838	7.096
1	24390812	7.349
1	24391468	7.172
1	24393120	5.479
1	24393473	5.758
1	24393782	5.357
1	24395338	6.087
1	24491121	8.071
1	24492692	7.716
1	24494922	7.13
1	24497209	7.488
1	24498169	7.374
1	24500676	7.472
1	24501130	7.383
1	24502080	7.965
1	24506088	7.967
1	24509217	7.588
1	24509482	5.22
1	24510010	6.098
1	24513166	6.262
1	24513515	5.64
1	24513814	5.455
1	24514564	6.256
1	24515591	5.989
1	24515728	5.276
1	24518348	5.353
1	24528730	5.066
1	24558499	5.778
1	24558888	6.168
1	24559732	5.756
1	24560350	7.001
1	24560963	7.219
1	24561309	7.31
1	24561603	6.947
1	24562013	12.479
1	24565232	11.976
1	24566419	13.21
1	24566734	13.559
1	24567523	13.902
1	24569654	12.326
1	24572053	14.359
1	24582096	14.937
1	24582542	13.04
1	24584216	15.337
1	24584522	15.222
1	24585497	15.61
1	24586102	15.358
1	24587281	15.578
1	24587547	15.582
1	24588731	13.322
1	24588948	14.499
1	24590353	16.773
1	24591193	15.058
1	24591594	17.055
1	24591787	17.061
1	24593935	17.157
1	24594493	16.267
1	24595091	7.271
1	24595392	6.545
1	24603850	5.055
1	24605918	5.089
1	24607024	5.096
1	24615749	5.428
1	24621378	5.876
1	24624325	5.725
1	24629677	5.257
1	24629908	5.382
1	24631510	5.598
1	24631611	5.552
1	24631864	5.326
1	24633109	5.693
1	24633184	5.189
1	24635501	5.752
1	24635536	6.249
1	24635760	6.39
1	24638031	5.012
1	24638259	5.924
1	24638832	6.228
1	24638894	6.178
1	24639696	6.189
1	24640691	5.51
1	24641427	5.508
1	24651909	5.931
1	24652540	6.157
1	24653875	6.737
1	24656558	6.691
1	24657956	6.195
1	24658059	6.097
1	24661047	5.97
1	24661431	6.649
1	24661713	5.402
1	24669117	5.252
1	24670308	5.657
1	24670574	5.077
1	24679453	5.336
1	24680961	5.001
1	24683026	5.527
1	24683378	5.649
1	24686597	5.901
1	24688921	5.739
1	24691001	5.672
1	24691035	5.217
1	24693594	5.468
1	24693622	5.431
1	24705112	5.205
1	24705665	5.288
1	24706748	5.715
1	24708549	6.066
1	24708882	5.879
1	24710294	6.251
1	24713093	5.843
1	24713980	5.848
1	24714291	5.424
1	24714439	6.16
1	24716711	6.645
1	24717166	6.805
1	24717296	6.56
1	24717714	6.097
1	24721477	6.594
1	24721824	7.97
1	24723428	7.507
1	24726558	7.43
1	24728623	6.968
1	24745717	5.135
1	24747081	6.359
1	24748288	6.727
1	24753203	6.894
1	24754233	6.613
1	24754470	6.41
1	24754783	6.425
1	24756786	6.261
1	24757270	6.182
1	24758094	6.12
1	24758650	6.272
1	24758713	6.688
1	24760232	6.653
1	24761643	6.127
1	24763266	5.321
1	24763553	5.67
1	24764583	5.601
1	24770707	5.689
1	24771240	6.038
1	24772454	6.517
1	24774018	6.398
1	24776153	6.183
1	24778572	6.014
1	24782003	5.863
1	24789242	6.164
1	24789330	5.861
1	24789524	5.319
1	24790177	6.182
1	24790353	5.821
1	24790690	6.234
1	24790901	5.897
1	24791767	5.657
1	24791870	5.75
1	24792863	5.839
1	24795313	5.494
1	24796420	5.01
1	24798433	5.761
1	24798583	5.465
1	24798788	6.626
1	24799210	6.248
1	24799467	6.374
1	24800959	5.769
1	24807847	5.546
1	24808373	5.809
1	24808449	5.733
1	24809968	5.992
1	24812170	5.881
1	24816047	5.724
1	24816656	5.644
1	24818469	5.697
1	24819993	5.666
1	24821219	5.858
1	24821651	5.548
1	24822116	5.742
1	24823512	5.45
1	24823723	5.292
1	24824704	5.227
1	24826128	6.001
1	24827174	6.081
1	24827852	5.851
1	24829538	6.297
1	24830745	5.76
1	24831077	5.671
1	24833418	5.598
1	24834746	5.63
1	24835255	5.647
1	24837296	5.252
1	24837683	5.288
1	24840776	5.676
1	24841730	5.155
1	24842599	5.646
1	24852120	5.124
1	24853857	5.061
1	24893053	5.103
1	24893106	5.275
1	24894310	5.091
1	24896940	5.125
1	24898106	5.162
1	24899032	5.536
1	24899094	5.517
1	24901219	5.517
1	24901680	5.58
1	24902072	5.356
1	24902924	5.69
1	24902959	5.253
1	24903674	5.658
1	24905720	5.811
1	24905959	5.795
1	24906407	5.487
1	24954794	5.509
1	24957511	5.662
1	24957732	6.104
1	24958142	5.563
1	25193254	5.34
1	25194078	7.996
1	25195183	7.497
1	25196004	8.925
1	25196635	8.325
1	25198066	8.137
1	25198537	8.915
1	25202953	8.922
1	25203971	7.372
1	25206586	8.506
1	25207282	7.46
1	25207372	8.279
1	25210097	8.791
1	25210458	8.86
1	25210515	9.707
1	25212185	9.073
1	25212955	9.118
1	25213533	9.534
1	25215064	8.197
1	25216667	9.942
1	25219449	9.269
1	25220373	9.665
1	25223205	9.493
1	25224136	8.576
1	25224279	9.214
1	25225500	9.572
1	25227010	9.568
1	25227637	9.78
1	25229053	9.743
1	25229183	9.71
1	25229221	9.146
1	25231819	9.262
1	25232608	9.431
1	25234681	9.184
1	25238115	9.731
1	25239107	9.658
1	25239144	9.216
1	25239978	9.665
1	25240088	9.585
1	25240673	9.03
1	25240844	9.275
1	25241585	9.558
1	25241660	9.64
1	25241761	9.219
1	25241991	9.41
1	25243565	9.55
1	25245050	9.386
1	25248690	9.268
1	25249415	10.443
1	25249583	10.311
1	25251805	10.111
1	25253496	10.006
1	25253614	9.702
1	25253920	9.746
1	25255886	5.985
1	25256103	5.786
1	25256493	5.954
1	25256744	5.882
1	25260176	5.307
1	25265809	5.17
1	25271012	5.555
1	25272222	5.202
1	25273045	5.276
1	25273406	5.076
1	25301239	5.285
1	25301938	5.321
1	25305262	5.314
1	25305393	5.442
1	25306797	5.524
1	25306922	5.361
1	25317491	5.356
1	25317975	5.363
1	25318482	5.34
[truncated: 103,921 more rows]
