# Supplementary material for: Genome-Wide Signatures of Selection Reveal Genes Associated With Performance in American Quarter Horse Subpopulations
Source: Front Genet. 2018 Jul 19;9:249. doi: 10.3389/fgene.2018.00249 (PMC6060370; doi:10.3389/fgene.2018.00249)
Supplement: Supplementary Table 5 — Genes identified by Endeavor using the skeletal muscle seed gene list in all 6 QH subpopulations ranked by p-value. Each column on the table corresponds to a human-based data source used by Endeavor-GW to rank the provided list of genes based on the seed genes. These are: gene and protein function, chemical information, biomolecular pathways, phenotypic information, interaction networks, expression profiles, expression ontologies, and sequence-based features. [file Table_5.XLSX]

## Sheet: Cutting_Skeletal_Muscle
Gene name	Group	P-value	Annotation â€“ Gene Ontology	Annotation â€“ UniProt	Text-mining	Annotation â€“ InterPro	Annotation â€“ Pfam	Annotation â€“ SIMAP (localization)	Annotation â€“ DrugBank	Annotation â€“ Stitch	Annotation â€“ RGD ChEBI	Annotation â€“ Reactome	Annotation â€“ WikiPathways	Annotation â€“ RGD pathways	Annotation â€“ BioCarta	Annotation â€“ CPDB	Annotation â€“ hiPathDB	Annotation â€“ GAD	Annotation â€“ OMIM	Annotation â€“ RGD MP	Annotation â€“ RGD RDO	Interaction â€“ String	Interaction â€“ BioGrid	Interaction â€“ I2D	Interaction â€“ IntAct	Interaction â€“ iRefIndex	Interaction â€“ Mint	Interaction â€“ HPRD	Interaction â€“ MIPS	Interaction â€“ GeneRIF	Expression â€“ Su et al (2002)	Expression â€“ Su et al (2004)	Expression â€“ CMAP	Expression â€“ Lukk et al	Annotation â€“ PaGenBase	Annotation â€“ CGAP	Annotation â€“ GNF	Annotation â€“ eGenetics	Blast	Precalculated â€“ Ouzounis	Precalculated â€“ Prospectr	Precalculated â€“ HaploPred	Annotation â€“ Aura	Annotation â€“ mirZ	id
ACTA1	Training gene	0.0075	0.0081	0.0075	0.049	0.0081	0.0252	0	0.0588	0	0.0775	0	0.0294	0	0.0294	0.0685	0.2	0.0989	0.0323	0.0308	0.025	0.0448	0.0373	0.0373	0.0299	0.0373	0.0224	0.0299	0.5448	0.0373	0.0357	0.0238	0.1548	0.0238	0.015	0.2256	0.0172	0	0.0373	0.0721	0.6032	0.0484	0.6532	0.5038	0
ACTB	Training gene	0.0149	0.0163	0.0149	0.0784	0.0081	0.0252	0	0	0	0.0078	0.1042	0.0588	0.1351	0.1176	0.0822	0.0889	0.5934	0.129	0.0154	0.325	0.0075	0.0373	0.0373	0.0299	0.0373	0.0224	0.0299	0.0075	0.0373	0.0893	0.4881	0.2857	0.119	0.1729	0.1128	0.0431	0.2804	0.0373	0.0631	0.5238	0.0081	0.0081	0.5038	1
RYR1	Training gene	0.0224	0.0244	0.1791	0.0686	0.0242	0.0084	0.5	0.1176	0.0469	0.2016	0.1875	0.0882	0.2973	0	0.0137	0.1778	0.011	0.0645	0.0615	0.075	0.0672	0.0373	0.0373	0.0299	0.0373	0.0224	0.0299	0.5448	0.0373	0.1071	0.0119	0.131	0.0357	0.0602	0.2932	0.0259	0.0187	0.0373	0	0.0397	0.6613	0.1694	0.5038	2
GYS1	Training gene	0.0299	0.5691	0.0299	0.0588	0.0403	0.042	0	0	0.1406	0.1085	0.0417	0.2353	0.027	0.0882	0.0274	0.0222	0.022	0.1935	0.1231	0.425	0.1045	0.0373	0.0373	0.0299	0.0373	0.0224	0.0299	0.5448	0.0373	0.0536	0.0595	0.1786	0.0714	0.0301	0.1729	0.0431	0.1402	0.0373	0.0811	0.1984	0.379	0.2984	0.5038	3
SLC2A4	Training gene	0.0373	0.0732	0.0224	0.0882	0.0484	0.1092	0.5	0	0.0938	0.124	0.0208	0.1765	0.0541	0.0588	0.0411	0.0444	0.1758	0.2258	0.0462	0.35	0.1045	0.0373	0.0373	0.0299	0.0373	0.0224	0.0299	0.5448	0.0373	0.0714	0.369	0.0595	0.1071	0.0301	0.1429	0.5431	0.0093	0.0373	0.1532	0.5238	0.4677	0.6532	0.5038	4
MYH1	Training gene	0.0448	0.0488	0.1343	0.0196	0.0726	0.0588	0.5	0	0	0.0543	0	0	0.1081	0	0.0959	0.0667	0.1538	0	0.1692	0	0.0075	0.0373	0.0373	0.0299	0.0373	0.5522	0.0299	0.5448	0.0373	0	0.0357	0.0119	0.0119	0.0226	0.2932	0.0603	0.0187	0.0373	0.4144	0.6349	0.1129	0.1694	0.5038	5
MSTN	Training gene	0.0522	0.065	0.6119	0.1078	0.0565	0.0756	0.5	0	0.1094	0.093	0	0.2647	0	0	0.1507	0	0.1099	0.1613	0.0923	0.375	0.1045	0.0373	0.0373	0.6343	0.0373	0.5522	0.0299	0.5448	0.0373	0.125	0.2976	0.0357	0.0952	0.0075	0.6541	0.5431	0.0748	0.0373	0.1892	0.5873	0.0565	0.1694	0.5038	6
SEPN1	Training gene	0.0597	0.4878	0.1269	0.0392	0.1452	0.5714	0.5	0	0.1563	0.4574	0	0	0	0	0.589	0	0	0.0968	0.1538	0.05	0.0448	0.0373	0.0373	0.0299	0.0373	0.5522	0.5821	0.5448	0.0373	0	0	0	0	0.1805	0.1429	0	0.1402	0.0373	0.1622	0.4127	0.7419	0.6532	0.5038	7
MICAL2	Training gene	0.0672	0.4146	0.2164	0.0098	0.0806	0.0672	0	0	0	0.1705	0	0	0	0	0	0	0.5934	0	0	0	0.5896	0.0373	0.0373	0.6343	0.0373	0.5522	0.5821	0.5448	0.0373	0.1429	0.4286	0.3095	0.131	0.594	0.0526	0.5431	0.215	0.0373	0.5225	0.119	0.371	0.1694	0.5038	8
DLAT	Candidate gene	0.0746	0.4878	0.6119	0.5294	0.5887	0.5714	0.5	0.5882	0.375	0.3488	0.4792	0.3824	0.5946	0	0.589	0.6222	0.5934	0.6129	0	0.55	0.1343	0.4701	0.1866	0.1269	0.5299	0.5522	0.5821	0.5448	0.5	0.7679	0.619	0.119	0.3214	0.0752	0.188	0.0431	0.2991	0.6343	0.2703	0.1984	0.0887	0.6532	0.5038	9
NEB	Candidate gene	0.0821	0.0325	0.1716	0.1765	0.5887	0.5714	0.5	0	0.6875	0.2713	0.7917	0.1176	0	0	0.589	0.6222	0.5934	0.6129	0	0.1	0.0821	0.5597	0.1418	0.2313	0.2537	0.0896	0.0821	0.5448	0.291	0.9286	0.0476	0.8214	0.0476	0.0451	0.2932	0.0603	0.3084	0.6343	0.8739	0.0397	0.75	0.1694	0	10
NPAS2	Candidate gene	0.0896	0.4878	0.6119	0.2647	0.5887	0.5714	0.5	0	0.6875	0.3488	0.4792	0	0	0.5588	0.589	0.6222	0.5934	0	0.4923	0	0.5896	0.3657	0.4627	0.0746	0.3284	0.5522	0.1343	0.5448	0.4627	0.1786	0.3333	0.5119	0.381	0.594	0.6541	0.5431	0.215	0.1493	0.4685	0.754	0.6371	0.1694	0.5038	11
SLC25A12	Candidate gene	0.097	0.252	0.0746	0.598	0.0968	0.5714	0	0.5882	0.6875	0.7674	0.0625	0	0	0	0.589	0.6222	0.5934	0.6129	0.5231	0.55	0.5896	0.4179	0.3433	0.2463	0.3284	0.5522	0.5821	0.5448	0.4328	0.7321	0.1786	0.6429	0.0833	0.0752	0.1429	0.5431	0.6729	0.1716	0.0991	0.1587	0.5161	0.6532	0.5038	12
SCN1A	Candidate gene	0.1045	0.0407	0.0746	0.5588	0.1613	0.1261	0.5	0.5882	0.0156	0.5039	0.3333	0	0	0	0.589	0	0.1319	0.6129	0.4308	0.55	0.5896	0.4701	0.3209	0.1119	0.8284	0.5522	0.5821	0.5448	0.5	0	0.8214	0.2262	0.369	0.594	0.6541	0.5431	0.6729	0.6343	0.0541	0.0873	0.5968	0.1694	0.5038	13
ACOT7	Candidate gene	0.1119	0.252	0.6119	0.549	0.5887	0.5714	0.5	0	0.2188	0.0155	0	0	0	0	0.589	0.6222	0.5934	0	0	0	0.5896	0.3134	0.0896	0.6343	0.0896	0.5522	0.5821	0.5448	0.3358	0.625	0.631	0.4881	0.4881	0.594	0.6541	0.5431	0.0748	0.6343	0.4955	0.4127	0.9355	0.6532	0.5038	14
COX7A1	Training gene	0.1194	0.252	0.6119	0.0294	0.0645	0.0504	0.5	0.1765	0.6875	0.1473	0	0.5294	0.2703	0	0.589	0	0.5934	0	0.2308	0	0.5896	0.8433	0.791	0.6343	0.8284	0.5522	0.5821	0.5448	0.8433	0.0179	0.0714	0.0238	0.0595	0.0526	0.203	0.0086	0.1682	0.0821	0.9279	0.9841	0.8226	0.6532	0.5038	15
ERBB3	Candidate gene	0.1269	0.7236	0.6119	0.3333	0.5887	0.5714	0.5	0	0.2031	0.0388	0.375	0.7941	0.8378	0.5588	0.1644	0.1556	0.5934	0.6129	0.1846	0.275	0.1343	0.6045	0.5224	0.2164	0.4552	0.1045	0.1642	0.5448	0.5448	0.4107	0.381	0.7143	0.8214	0.594	0.6541	0.5431	0.6729	0.6343	0.027	0.0635	0.0161	0.1694	0.5038	16
GAD1	Candidate gene	0.1343	0.4878	0.0746	0.2255	0.5887	0.5714	0.5	0.5882	0.1719	0.0698	0.7917	0.7941	0.5676	0	0.589	0.6222	0.5934	0.6129	0.4462	0.55	0.5896	0.4701	0.306	0.0896	0.2313	0.5522	0.1119	0.5448	0.3507	0.1607	0.75	0.5833	0.8095	0.594	0.6541	0.5431	0.6729	0.6343	0.2973	0.2143	0.0323	0.1694	0.5038	17
EIF2B3	Candidate gene	0.1418	0.6911	0.0746	0.2843	0.5887	0.5714	0	0	0.6875	0.5039	0.1458	0.7941	0	0.5588	0.589	0.6222	0.5934	0.6129	0	0.45	0.5896	0.6493	0.3582	0.6343	0.3284	0.5522	0.5821	0.5448	0.6343	0	0.2738	0.6905	0.2619	0.594	0.2707	0.5431	0.1589	0.1791	0.045	0.7063	0.2258	0.6532	0.5038	18
CLSTN1	Candidate gene	0.1493	0.252	0.6119	0.7157	0.121	0.5714	0.5	0	0	0.4574	0	0	0	0	0	0	0	0	0	0	0.5896	0.5075	0.4627	0.6343	0.5896	0.5522	0.5821	0.5448	0.6343	0.2679	0.7024	0.5476	0.5	0.594	0.2556	0.5431	0.0748	0.6343	0.2162	0.2302	0.121	0.1694	0.5038	19
SLC1A5	Candidate gene	0.1567	0.252	0.6119	0.6765	0.5887	0.5714	0.5	0.5882	0	0.5039	0.2708	0	0	0.5588	0.589	0.6222	0.5934	0	0	0	0.5896	0.4104	0.1642	0.6343	0.6269	0.5522	0.5821	0.5448	0.4478	0.3214	0.9167	0.6667	0.3571	0.594	0.6541	0.5431	0	0.6343	0.3153	0.119	0.4919	0.6532	0.5038	20
CLTA	Candidate gene	0.1642	0.252	0.6119	0.1863	0.5887	0.5714	0.5	0	0.6875	0.3488	0.5625	0	0.6486	0.5588	0.589	0.6222	0.5934	0	0	0	0.5896	0.1642	0.2015	0.1866	0.2836	0.5522	0.097	0.5448	0.2388	0.5179	0.7262	0.6548	0.2381	0.594	0.1429	0.5431	0.0748	0.6343	0.5405	0.8492	0.7097	0.6532	0.5038	21
ACTR6	Candidate gene	0.1716	0.252	0.194	0.8529	0.0323	0.0252	0	0	0	0.7674	0	0	0	0	0	0	0	0	0	0	0.5896	0.2612	0.2836	0.209	0.3955	0.0672	0.5821	0.0448	0.2836	0	0.869	0.1905	0.2857	0.594	0.6541	0.5431	0.3271	0.0896	0.4054	0.3254	0.1532	0.6532	0.5038	22
NMNAT1	Candidate gene	0.1791	0.626	0.0746	0.5196	0.5887	0.5714	0	0.5882	0.3125	0.3488	0.4792	0	0.2162	0.5588	0.589	0.6222	0.5934	0.6129	0.5692	0	0.5896	0.3881	0.3209	0.6343	0.6045	0.5522	0.5821	0.5448	0.4478	0	0	0	0	0.594	0.6541	0.5431	0	0.6343	0.9189	0.4127	0.7258	0.6532	0.5038	23
RIF1	Candidate gene	0.1866	0.4878	0.194	0.7451	0.5887	0.5714	0	0	0	0.1705	0	0	0	0	0	0	0.5934	0	0.5385	0	0.5896	0.5448	0.4851	0.2612	0.4701	0.5522	0.5821	0.5448	0.3806	0.1964	0.5238	0.7857	0.4524	0.594	0.0526	0.5431	0.6729	0.2537	0.5946	0.4127	0.1613	0.6532	0.5038	24
MYO3B	Candidate gene	0.194	0.4065	0.2164	0	0.1129	0.1008	0	0	0	0.2093	0	0	0	0	0	0	0.5934	0	0	0	0.5896	0.0896	0.0821	0.0821	0.8284	0.5522	0.5821	0.5448	0.0896	0	0	0	0	0.594	0.6541	0.5431	0.6729	0.0746	0.4234	0.6825	0.7016	0.1694	0.5038	25
DLAT	Candidate gene	0.2015	0.4878	0.6119	0.5294	0.5887	0	0	0.5882	0	0.3488	0	0.3824	0.5946	0	0.589	0.6222	0.5934	0.6129	0	0.55	0.5896	0.4701	0.791	0.6343	0.5299	0.5522	0.5821	0.5448	0.5	0	0	0	0	0.0752	0.188	0	0	0.6343	0	0	0.0887	0.6532	0.5038	26
RARS2	Candidate gene	0.209	0.252	0.6119	0.6667	0.5887	0.5714	0.5	0	0.6875	0.1395	0.7917	0	0	0.5588	0.589	0.6222	0	0.6129	0.7077	0.55	0.5896	0.3134	0.1716	0.6343	0.5597	0.5522	0.5821	0.5448	0.3134	0	0	0	0	0.594	0.6541	0.5431	0	0.6343	0.3333	0.4127	0.2581	0.6532	0.5038	27
PDHX	Candidate gene	0.2164	0.252	0.6119	0.6471	0.5887	0.5714	0.5	0	0.3594	0.7674	0.4792	0.3824	0.7027	0.5588	0.589	0.6222	0.5934	0.6129	0	0	0.5896	0.5672	0.1343	0.6343	0.2015	0.5522	0.1194	0.5448	0.403	0.75	0.2857	0.2024	0.1905	0.1805	0.0526	0.5431	0.6729	0.6343	0.018	0.4127	0.9677	0.6532	0.5038	28
GNE	Candidate gene	0.2239	0.252	0.0746	0.6373	0.5887	0.5714	0.5	0	0.3125	0.7674	0	0	0.4865	0	0.589	0	0.0549	0.6129	0.1077	0.175	0.0746	0.6194	0.4254	0.6343	0.4328	0.5522	0.5821	0.5448	0.6493	0.8036	0.4167	0.619	0.881	0.594	0.6541	0.5431	0.6729	0.2015	0.036	0.6667	0.2984	0.6532	0.5038	29
SSB	Candidate gene	0.2313	0.8699	0.6119	0.4804	0.5887	0.5714	0.5	0	0.6875	0.4341	0	0	0.1622	0.5588	0.589	0.6222	0	0	0.7077	0	0.5896	0.2537	0.1269	0.194	0.3731	0.0522	0.5821	0.0224	0.2463	0.2143	0.9405	0.2619	0.1548	0.594	0.6541	0.5431	0.215	0.1343	0.7207	0.4127	0.0242	0.6532	0.5038	30
TTC21B	Candidate gene	0.2388	0.252	0.1567	0.6863	0.5887	0.5714	0.5	0	0	0.3488	0	0	0	0	0	0	0.5934	0.6129	0.8	0	0.5896	0.0746	0.2388	0.1119	0.1418	0.5522	0.5821	0.5448	0.0746	0	0.2262	0.1071	0.3333	0.594	0.6541	0.5431	0.6729	0.6343	0.4775	0.4127	0.7984	0.6532	0.5038	31
UBE4B	Candidate gene	0.2463	0.0894	0.6119	0.7255	0.5887	0.5714	0.5	0	0	0.7674	0	0	0.8378	0.5588	0.589	0	0.1648	0	0.2154	0	0.5896	0.6343	0.2687	0.1642	0.3657	0.5522	0.5821	0.5448	0.6194	0.6429	0.1548	0.3333	0.4643	0.594	0.6541	0.5431	0.6729	0.6343	0.3784	0.6667	0.4113	0.1694	0.5038	32
ZNF292	Candidate gene	0.2537	0.8699	0.6119	0	0.5887	0.5714	0.5	0	0	0.3488	0	0	0	0	0	0	0.5934	0	0	0	0.5896	0.3134	0.5597	0.6343	0.2687	0.5522	0.5821	0.5448	0.3134	0.6071	0.6786	0.3452	0.5952	0.594	0.6541	0.5431	0.6729	0.2313	0	0.5556	0.0403	0.1694	0.5038	33
PIP4K2A	Candidate gene	0.2612	0.252	0.6119	0.3137	0.5887	0.5714	0	0	0.3125	0.093	0.4792	0.4412	0.4595	0.5588	0.589	0.1333	0.5934	0	0	0	0.5896	0.1642	0.3806	0.6343	0.291	0.5522	0.1045	0.5448	0.0821	0.6964	0.9286	0.5714	0.3452	0.594	0.6541	0.5431	0.6729	0.6343	0.7477	0.3254	0.7823	0.1694	0.5038	34
GLE1	Candidate gene	0.2687	0.252	0.0746	0.451	0.5887	0.5714	0.5	0	0.6875	0.5039	0	0	0	0	0	0	0.5934	0.6129	0.7077	0.175	0.0896	0.3881	0.791	0.6343	0.4776	0.5522	0.5821	0.5448	0.403	0.3929	0.3214	0.8333	0.1429	0.1654	0.6541	0.5431	0.6729	0.6343	0	0.4127	0.3629	0.6532	0.5038	35
NR1H4	Candidate gene	0.2761	0.7236	0.1418	0.3627	0.5887	0.5714	0.5	0.5882	0.6875	0.093	0.7917	0.7941	0.0811	0.5588	0.589	0.6222	0.0549	0	0.3846	0.875	0.5896	0.5746	0.1194	0.1343	0.4104	0.5522	0.1418	0.5448	0.597	0.875	0.2143	0.381	0.7143	0.594	0.6541	0.5431	0.6729	0.194	0.2252	0.119	0.2177	0.6532	0.5038	36
NFE2L2	Candidate gene	0.2836	0.4878	0.6119	0.2941	0.5887	0.5714	0.5	0	0.6875	0.0465	0	0.7941	0.8378	0.5588	0.589	0.6222	0.0549	0	0.3385	0.4	0.1493	0.4403	0.4925	0.6343	0.3955	0.5522	0.1567	0.5448	0.4851	0.7143	0.5357	0.3571	0.9643	0.594	0.0526	0.5431	0	0.2388	0.2793	0.5238	0.1774	0.6532	0.5038	37
CNR1	Candidate gene	0.291	0.7154	0.6119	1	0.5887	0.5714	0.5	0.5882	0.6875	0.031	0.7917	0.7941	0.3514	0.5588	0.589	0.6222	0.0549	0	0.3231	0.25	0.0373	0.6866	0.5672	0.6343	0.8284	0.5522	0.5821	0.0597	0.8433	0.5714	0.3095	0.0476	0.75	0.594	0.2256	0.5431	0	0.6343	0.009	0.8333	0.3065	0.1694	0.5038	38
ZFYVE1	Candidate gene	0.2985	0.4878	0.6119	0	0.5887	0.5714	0.5	0	0.6875	0.7674	0	0	0	0	0	0	0	0	0	0	0.5896	0.1642	0.2388	0.6343	0.1418	0.0522	0.5821	0.5448	0.1716	0	0	0	0	0.594	0.6541	0.5431	0.215	0.6343	0.6396	0.6667	0.5726	0.6532	0.5038	39
PRKG2	Candidate gene	0.306	0.252	0.6119	0.4118	0.5887	0.5714	0.5	0	0.6875	0.7674	0.4792	0	1	0	0.589	0.2222	0.5934	0	0.5538	0	0.5896	0.4701	0.2388	0.1493	0.2985	0.5522	0.0746	0.5448	0.2687	0.5	0.119	0.6071	0.7976	0.594	0.6541	0.5431	0.6729	0.6343	0.1712	0.119	0.5645	0.6532	0.5038	40
RIMS1	Candidate gene	0.3134	0.626	0.0746	0.3431	0.5887	0.5714	0.5	0	0.6875	0.2326	0.7917	0	0	0.5588	0.589	0.6222	0.5934	0.6129	0.4769	0.75	0.5896	0.8433	0.4776	0.0896	0.4851	0.5522	0.5821	0.0597	0.8433	0.8214	0.1905	0.3214	0.4286	0.594	0.2256	0.5431	0.6729	0.6343	0.1351	0.6825	0.2097	0.1694	0.5038	41
CWC22	Candidate gene	0.3209	0.252	0.6119	0.1961	0.5887	0.5714	0	0	0.6875	0.7674	0	0	0	0	0	0	0.5934	0	0	0	0.5896	0.1642	0.403	0.6343	0.6493	0.5522	0.5821	0.0821	0.2761	0	0	0	0	0.594	0.6541	0.5431	0.6729	0.6343	0.4414	0.1984	0	0.6532	0.5038	42
GORASP2	Candidate gene	0.3284	0.4878	0.1418	0.8333	0.5887	0.5714	0	0	0	0.7674	0.7917	0	0	0	0.589	0	0.5934	0	0	0	0.5896	0.6642	0.4104	0.6343	0.5746	0.097	0.5821	0.5448	0.6567	0.5893	0.5595	0.2381	0.5833	0.594	0.0526	0.5431	0.6729	0.6343	0.2883	0.4127	0.5403	0.1694	0.5038	43
TLK1	Candidate gene	0.3358	0.8699	0.6119	0.6961	0.5887	0.5714	0.5	0	0	0.3488	0	0.7941	0	0	0.589	0	0.5934	0	0	0	0.5896	0.5896	0.4403	0.6343	0.5821	0.5522	0.5821	0.5448	0.6045	0.3393	0.2619	0.2976	0.2143	0.594	0.6541	0.5431	0.6729	0.6343	0	0.4921	0.3952	0.6532	0.5038	44
BMP3	Candidate gene	0.3433	0.626	0.6119	0.3529	0.0887	0.0756	0.5	0	0.25	0.7674	0	0.4706	0	0	0.137	0	0.5934	0	0.6	0.75	0.5896	0.8433	0.5299	0.6343	0.4328	0.5522	0.5821	0.5448	0.8433	0.8393	0.0833	0.2143	0.6429	0.594	0.6541	0.5431	0.6729	0.097	0.1261	0.246	0.3871	0.6532	0.5038	45
GLIPR2	Candidate gene	0.3507	0.252	0.6119	0	0.5887	0.5714	0.5	0.5882	0.6875	0.2558	0	0	0	0	0	0	0.5934	0	0	0	0.5896	0.0896	0.3209	0.6343	0.306	0.5522	0.0597	0.5448	0.0896	0	0	0	0	0.594	0.6541	0	0	0.6343	0.8468	0.2937	0	0.6532	0.5038	46
SPSB1	Candidate gene	0.3582	0.252	0.6119	0.5098	0.1774	0.0924	0	0	0	0.2403	0.7917	0	0	0	0.589	0	0.5934	0	0	0	0.5896	0.4254	0.4104	0.194	0.5149	0.5522	0.5821	0.5448	0.2985	0	0.1667	0.9881	0.619	0.594	0.6541	0.5431	0.6729	0.6343	0.4324	0.1587	0.2339	0.6532	0.5038	47
SRSF10	Candidate gene	0.3657	0.4878	0.6119	0.7941	0.5887	0.5714	0.5	0	0	0.186	0	0.5	0.8378	0	0.589	0	0	0	0.2923	0	0.5896	0.6119	0.1119	0.1418	0.2687	0.5522	0.5821	0.5448	0.5672	0	0	0	0	0.594	0.6541	0.5431	0.0748	0.6343	0	0.627	0	0	0.5038	48
MDN1	Candidate gene	0.3731	0.626	0.6119	0.8137	0.5887	0.5714	0.5	0	0	0.1705	0	0	0.8378	0	0.589	0	0.5934	0	0.7077	0	0.5896	0.2761	0.209	0.6343	0.2463	0.5522	0.5821	0.5448	0.3134	0.4464	0.8929	0.4762	0.631	0.594	0.0526	0.5431	0	0.6343	0.5766	0.2222	0.4677	0.1694	0.5038	49
TMTC3	Candidate gene	0.3806	0.0569	0.6119	0	0.5887	0.5714	0.5	0	0.6875	0.7674	0	0	0	0	0	0	0	0	0.5077	0	0.5896	0.1642	0.791	0.6343	0.1418	0.5522	0.5821	0.5448	0.1716	0	0	0	0	0.594	0.6541	0.5431	0.6729	0.6343	0.6036	0.0238	0.7581	0.6532	0.5038	50
H6PD	Candidate gene	0.3881	0.252	0.0746	0.402	0.5887	0.5714	0.5	0.5882	0.0625	0.062	0	0	0.4865	0	0.589	0.6222	0.5934	0.6129	0.2462	0.85	0.1642	0.8433	0.791	0.6343	0.8284	0.5522	0.5821	0.5448	0.8433	0.2321	0.1071	0.7024	0.6071	0.594	0.6541	0.5431	0	0.6343	0.1982	0.246	0.7339	0.6532	0.5038	51
C12orf29	Candidate gene	0.3955	0	0.6119	0	0	0	0	0	0.6875	0	0	0	0	0	0	0	0	0	0	0	0.5896	0.1642	0.791	0.6343	0.1418	0.5522	0.5821	0.5448	0.1716	0.5536	0.6905	0.4167	0.5357	0.594	0.6541	0.5431	0.6729	0.1567	0.6937	0.4127	0.5806	0.6532	0.5038	52
PIK3CD	Candidate gene	0.403	0.7073	0.6119	0.1569	0.5887	0.5714	0	0.5882	0.6875	0.2171	0.5833	0.1471	0.7297	0	0.1096	0.1111	0.5934	0	0.7692	0.9	0.0299	0.4478	0.5149	0.2388	0.5448	0.5522	0.5821	0.5448	0.5299	0.3571	0.7619	0.9524	0.5119	0.594	0.2556	0.5431	0.6729	0.6343	0.3694	0.119	0.1371	0.6532	0.5038	53
SYT9	Candidate gene	0.4104	0.4878	0.6119	0	0.5887	0.5714	0.5	0	0.6875	0.7674	0	0	0.5405	0	0	0	0.5934	0	0	0	0.5896	0.6567	0.194	0.6343	0.597	0.5522	0.1493	0.5448	0.6642	0	0	0	0	0.594	0.6541	0.5431	0.215	0.6343	0.8829	0.619	0.4355	0.0323	0.5038	54
EPC1	Candidate gene	0.4179	0.8699	0.6119	0.3824	0.5887	0.5714	0.5	0	0	0.7674	0	0	0	0	0	0	0.5934	0	0.2	0	0.0224	0.3433	0.3433	0.6343	0.2687	0.5522	0.5821	0.0373	0.3507	0	0	0	0	0.594	0.6541	0	0.6729	0.6343	0.7027	0.7063	0.4435	0.1694	0.5038	55
NMI	Candidate gene	0.4254	0.4878	0.6119	0.3922	0.5887	0.5714	0.5	0	0	0.4574	0	0.7941	0	0.5588	0.589	0.6222	0.5934	0	0	0	0.5896	0.3358	0.5522	0.6343	0.4925	0.5522	0.5821	0.0149	0.4701	0.25	0.9643	0.4286	0.2976	0.594	0.188	0.5431	0.6729	0.6343	0.9099	0.754	0.0806	0.6532	0.5038	56
CTNNBIP1	Candidate gene	0.4328	0.4878	0.6119	0.2451	0.5887	0.5714	0	0	0.125	0.3488	0	0	0.3514	0.5588	0.589	0.6222	0	0	0.6615	0	0.5896	0.5149	0.2985	0.2164	0.4627	0.5522	0.1194	0.5448	0.4776	0.3036	0.6667	0.9286	0.7381	0.594	0.6541	0	0	0.6343	0.2523	0.9921	0.6532	0.6532	0.5038	57
COMMD10	Candidate gene	0.4403	0.626	0.6119	0.1275	0.5887	0.5714	0	0	0	0.7674	0	0	0	0	0	0	0.5934	0	0	0	0.5896	0.4701	0.4254	0.6343	0.6119	0.5522	0.5821	0.5448	0.5	0	0.7976	0.5595	0.5714	0.594	0.6541	0.5431	0.6729	0.6343	0.7568	0.8016	0.621	0.6532	0.5038	58
CSMD2	Candidate gene	0.4478	0.8699	0.6119	0	0.5887	0.5714	0.5	0	0	0.7674	0	0	0	0	0	0	0.5934	0	0	0	0.5896	0.8433	0.1045	0.0672	0.0821	0.0672	0.5821	0.5448	0.8433	0	0	0	0	0.594	0.6541	0.5431	0.6729	0.6343	0.1081	0.0397	0.2419	0.6532	0.5038	59
KIAA1191	Candidate gene	0.4552	0.252	0.6119	0.8039	0.5887	0.5714	0	0	0	0.7674	0	0	0	0	0	0	0.5934	0	0	0	0.5896	0.2612	0.5299	0.6343	0.3284	0.5522	0.5821	0.5448	0.2537	0	0	0	0	0.594	0.1429	0	0.0748	0.2463	0.5135	0.7063	0.5565	0.6532	0.5038	60
CEP290	Candidate gene	0.4627	0.1057	0.1567	0.5	0.5887	0	0.5	0	0.6875	0.7674	0.7917	0	0	0.5588	0.589	0.6222	0.1319	0.6129	0.3692	1	0.5896	0.291	0.4627	0.1716	0.3806	0.5522	0.5821	0.5448	0.3731	0.4821	0.4405	0.5	0.4048	0.594	0.6541	0.5431	0.6729	0.1194	0	0.9365	0.3145	0.1694	0.5038	61
TIMM8B	Candidate gene	0.4701	0.252	0.6119	0.098	0.5887	0.5714	0.5	0	0	0.7674	0.1458	0	0	0	0.589	0	0.5934	0	0	0	0.5896	0.6716	0.791	0.6343	0.6194	0.5522	0.5821	0.5448	0.6716	0	0.3452	0.9167	0.5595	0.594	0.1429	0	0	0.6343	0.3514	0.2937	0.5	0.6532	0.5038	62
KLHL23	Candidate gene	0.4776	0	0.6119	0	0.5887	0.5714	0	0	0	0.7674	0	0	0	0	0	0	0	0	0	0	0.5896	0.0821	0.1791	0.1493	0.2313	0.0522	0.5821	0.5448	0.1045	0.5357	0.2381	0.4524	0.9286	0.594	0.6541	0.5431	0.6729	0.6343	0	0	0.6129	0.6532	0.5038	63
UBR3	Candidate gene	0.4851	0.8699	0.6119	0	0.5887	0.5714	0.5	0	0	0.7674	0	0	0	0	0	0	0.5934	0	0.4154	0	0.5896	0.5896	0.2761	0.1791	0.4328	0.5522	0.5821	0.5448	0.5746	0	0	0	0	0.594	0.0526	0.5431	0.6729	0.6343	0.7838	0.4127	0.4516	0.1694	0.5038	64
TEAD1	Candidate gene	0.4925	0.626	0.0746	0.2549	0.5887	0.5714	0	0	0.6875	0.3488	0.7917	0	0	0	0.589	0	0.5934	0.6129	0.1385	0.75	0.0597	0.6716	0.5821	0.2537	0.6418	0.5522	0.5821	0.5448	0.6791	0.9643	0.1429	0.9762	0.6548	0.0977	0.6541	0.5431	0.215	0.6343	0	0.4921	0.0645	0.1694	0.5038	65
SLC25A27	Candidate gene	0.5	0.252	0.6119	0.4608	0.5887	0.5714	0	0	0	0.4574	0	0.5294	0	0	0.589	0	0.5934	0	0	0.55	0.5896	0.8433	0.2388	0.6343	0.1418	0.5522	0.5821	0.5448	0.8433	0	0	0	0	0.594	0.6541	0	0	0.6343	0.5586	0.3095	0.7903	0.6532	0.5038	66
FRAS1	Candidate gene	0.5075	0.8699	0.6119	0.7059	0.5887	0.5714	0.5	0	0	0.7674	0	0	0	0	0	0	0.5934	0.6129	0.6154	0.75	0.5896	0.1642	0.791	0.6343	0.1418	0.5522	0.5821	0.5448	0.1716	0	0.0952	0.5952	0.5238	0.594	0.6541	0.5431	0.0748	0.6343	0.964	0.0159	0.2016	0.1694	0.5038	67
IL18	Candidate gene	0.5149	0.6911	0.6119	0.2353	0.5887	0.5714	0.5	0	0.1875	0.0155	0.7917	0.2647	0.4054	0.5588	0.1233	0.6222	0.1209	0	0.0769	0.15	0.1567	0.5373	0.791	0.6343	0.5597	0.5522	0.5821	0.5448	0.6343	0.4643	0.5476	0.869	0.9048	0.1128	0.6541	0.5431	0.6729	0.6343	0.1171	0.873	0.9839	0.6532	0.5038	68
LUC7L	Candidate gene	0.5224	0.626	0.6119	0.1275	0.5887	0.5714	0.5	0	0.6875	0.3488	0	0	0	0	0	0	0	0	0.9231	0	0.5896	0.6418	0.3657	0.6343	0.5224	0.5522	0.5821	0.5448	0.4254	0	0.4048	0.7619	0.9524	0.594	0.6541	0.5431	0.6729	0.6343	0.5676	0.4921	0.25	0.6532	0.5038	69
CPEB4	Candidate gene	0.5299	0.8699	0.6119	0.1471	0.5887	0.5714	0	0	0	0.7674	0	0	0	0	0	0	0.5934	0	0	0	0.5896	0.8433	0.791	0.6343	0.8284	0.5522	0.5821	0.5448	0.8433	0	0	0	0	0.594	0.0526	0.5431	0.6729	0.6343	0.1441	0.0079	0.1452	0.6532	0.5038	70
KCNIP1	Candidate gene	0.5373	0.626	0.6119	0.2157	0.0968	0.1429	0.5	0	0.2656	0.7674	0	0	0.6757	0	0	0	0.5934	0	0	0	0.5896	0.8433	0.791	0.6343	0.8284	0.5522	0.5821	0.0597	0.8433	0	0.131	0.7738	0.7024	0.594	0.2256	0.5431	0.6729	0.6343	0.6216	0.5714	0.3306	0.6532	0.5038	71
LZIC	Candidate gene	0.5448	0.561	0.6119	0.1275	0.5887	0.5714	0.5	0	0	0.7674	0	0	0	0	0	0	0	0	0	0.75	0.5896	0.3881	0.791	0.6343	0.3284	0.5522	0.5821	0.5448	0.403	0	0	0	0	0.594	0.0526	0.5431	0	0.6343	0.6577	0.8254	0.6694	0.6532	0.5038	72
CPSF2	Candidate gene	0.5522	0.626	0.6119	0.9608	0.5887	0.5714	0.5	0	0.6875	0.7674	0.7917	0.7941	0.8378	0.5588	0.589	0.6222	0.5934	0	0	0	0.5896	0.5	0.291	0.6343	0.4179	0.5522	0.0597	0.0299	0.5224	0	0	0	0	0.594	0.6541	0.5431	0.0748	0.6343	0.7117	0.4762	0.6855	0.6532	0.5038	73
PNRC2	Candidate gene	0.5597	0.4878	0.6119	0.8725	0.5887	0.5714	0	0	0	0.7674	0	0	0	0	0	0	0	0	0.2615	0	0.5896	0.5149	0.5448	0.6343	0.5075	0.5522	0.5821	0.5448	0.5746	0	0	0	0	0.594	0.6541	0.5431	0.0748	0.6343	0	0.873	0.1855	0.6532	0.5038	74
SESTD1	Candidate gene	0.5672	0.626	0.6119	0.3235	0.5887	0.5714	0.5	0	0	0.7674	0	0	0	0	0	0	0.5934	0	0	0	0.5896	0.8433	0.2388	0.6343	0.8284	0.5522	0.5821	0.5448	0.8433	0	0	0	0	0.594	0.6541	0.5431	0.1402	0.6343	0	0.4127	0.5484	0.1694	0.5038	75
DYNC1I2	Candidate gene	0.5746	0.252	0.194	0.9902	0.5887	0.5714	0.5	0	0.6875	0.7674	0.7917	0	0.9459	0.5588	0.589	0.6222	0.5934	0	0.6308	0	0.5896	0.5821	0.1493	0.6343	0.3582	0.5522	0.5821	0.5448	0.5597	0	0	0	0	0.594	0.6541	0	0.2804	0.6343	0.4865	0.5476	0.6371	0.6532	0.5038	76
SCN7A	Candidate gene	0.5821	0.0976	0.6119	0.8627	0.1613	0.1261	0.5	0	0.0156	0.3488	0.3333	0	0	0	0.589	0	0.5934	0	0.9231	0	0.5896	0.8433	0.791	0.6343	0.8284	0.5522	0.5821	0.5448	0.8433	0.375	0.4643	0.0833	0.1786	0.1353	0.6541	0.5431	0	0.6343	0.2072	0.5238	0.9274	0.6532	0.5038	77
GALNT3	Candidate gene	0.5896	0.252	0.6119	0.7353	0.5887	0.5714	0.5	0	0.6875	0.7674	0.1458	0	0.2162	0	0.589	0.6222	0.5934	0.6129	0.4	0.9	0.5896	0.8433	0.791	0.6343	0.8284	0.5522	0.5821	0.5448	0.8433	0.6607	0.4762	0.75	0.6667	0.594	0.6541	0.5431	0	0.6343	0.7928	0.1825	0.6371	0.6532	0.5038	78
CCNA1	Candidate gene	0.597	0.4878	0.6119	0.6176	0.5887	0.5714	0	0	0.0781	0.1318	0.7917	0.2059	0.4054	0.5588	0.0548	0.6222	0.5934	0	0.8462	0.95	0.5896	0.5522	0.4478	0.2687	0.5522	0.0821	0.5821	0.5448	0.5373	0.7857	0.8571	0.8452	0.9881	0.594	0.6541	0.5431	0.3271	0.6343	0.2613	0.5238	0.0726	0.6532	0.5038	79
ARSJ	Candidate gene	0.6045	0.252	0.6119	0.6275	0.5887	0.5714	0.5	0	0.6875	0.4574	0.3958	0	0	0	0.589	0	0.5934	0	0	0	0.5896	0.8433	0.791	0.6343	0.8284	0.5522	0.5821	0.5448	0.8433	0	0.5833	0.7381	0.4762	0.1353	0.6541	0.5431	0.0748	0.1642	0.5856	0.3492	0.9435	0.0323	0.5038	80
ECHDC2	Candidate gene	0.6119	0.252	0.6119	0	0.5887	0.5714	0.5	0	0.6875	0.7674	0	0.7941	0	0	0.589	0	0	0	0	0	0.1269	0.3881	0.3806	0.6343	0.8284	0.5522	0.5821	0.5448	0.403	0	0.3929	0.8929	0.2738	0.594	0.0526	0.5431	0.215	0.1418	0.3063	0.5635	0.9113	0.6532	0.5038	81
TMEM201	Candidate gene	0.6194	0.8699	0.6119	0	0.5887	0.5714	0.5	0	0	0.2558	0	0	0	0	0	0	0	0	0	0	0.5896	0.1642	0.791	0.6343	0.1418	0.5522	0.5821	0.5448	0.1716	0	0	0	0	0.594	0.6541	0.5431	0.6729	0.6343	0	0.9206	0.5081	0.0323	0.5038	82
SCYL2	Candidate gene	0.6269	0.4878	0.6119	0.8431	0.5887	0.5714	0.5	0	0	0.7674	0	0	0	0	0	0	0	0	0	0	0.5896	0.2836	0.3358	0.0597	0.2313	0.5522	0.5821	0.0896	0.1716	0	0.2024	0.4405	0.25	0.594	0.2556	0.5431	0.6729	0.6343	0.955	0.8968	0.6048	0.6532	0.5038	83
TIMP2	Candidate gene	0.6343	0.626	0.6119	0.4412	0.5887	0.5714	0.5	0	0.6875	0.1085	0.7917	0.7941	0	0.5588	0.589	0.6222	0.0549	0	0.7846	0.125	0.1194	0.6194	0.3955	0.6343	0.5	0.5522	0.5821	0.5448	0.6045	0.9464	0.9881	0.9048	0.7857	0.594	0.1053	0.5431	0.6729	0.6343	0.0901	0.1746	0.5242	0.6532	0.5038	84
CYP39A1	Candidate gene	0.6418	0.252	0.6119	0.5784	0.5887	0.5714	0.5	0	0.3125	0.7674	0.4792	0.7941	0.2162	0.5588	0.589	0.6222	0	0	0	0	0.5896	0.8433	0.791	0.6343	0.8284	0.5522	0.5821	0.5448	0.8433	0	0.8452	0.3929	0.8929	0.594	0.6541	0.5431	0.6729	0.6343	0.7387	0.246	0.5887	0.6532	0.5038	85
TNFAIP6	Candidate gene	0.6493	0.8699	0.6119	0.6569	0.5887	0.5714	0.5	0	0.6875	0.1473	0	0	0	0	0	0	0.5934	0	0.9231	0	0.5896	0.3134	0.791	0.6343	0.8284	0.5522	0.5821	0.5448	0.403	0.8571	0.4524	0.5357	0.6905	0.1353	0.6541	0.5431	0.6729	0.6343	0.2432	0.0635	0.1048	0.6532	0.5038	86
DPF3	Candidate gene	0.6567	0.8699	0.6119	0.7647	0.5887	0.5714	0	0	0	0.7674	0	0	0	0	0	0	0.5934	0	0	0	0.5896	0.2463	0.791	0.6343	0.209	0.5522	0.5821	0.5448	0.2537	0	0	0	0	0.0752	0.1429	0	0	0.6343	0	0	0.2742	0.1694	0.5038	87
TTYH1	Candidate gene	0.6642	0.252	0.6119	0.9314	0.5887	0.5714	0.5	0	0	0.7674	0.1875	0	0	0	0.589	0	0	0	0.8462	0	0.5896	0.1642	0.2388	0.6343	0.1418	0.5522	0.5821	0.5448	0.1716	0	0.9048	0.1429	0.5476	0.594	0.6541	0.5431	0.6729	0.2164	0.3243	0.9127	0.3468	0.6532	0.5038	88
PPFIBP2	Candidate gene	0.6716	0.8699	0.6119	0.2745	0.5887	0.5714	0.5	0	0	0.1938	0	0	0	0	0	0	0.5934	0	0	0	0.1716	0.4254	0.5672	0.6343	0.8284	0.5522	0.5821	0.5448	0.5448	0.6786	0.881	0.7976	0.7738	0.594	0.6541	0.0776	0.6729	0.1119	0.5315	0.4127	0.8145	0.6532	0.5038	89
ZNF385B	Candidate gene	0.6791	0.626	0.6119	0	0.5887	0.5714	0.5	0	0	0.7674	0	0	0	0	0	0	0.5934	0	0	0	0.5896	0.8433	0.791	0.6343	0.8284	0.5522	0.5821	0.5448	0.8433	0	0	0	0	0.594	0.6541	0.5431	0.6729	0.6343	0.4505	0.3254	0.1694	0.1694	0.5038	90
SLC17A8	Candidate gene	0.6866	0.252	0.0746	0	0.129	0.5714	0.5	0	0.2344	0.3488	0.2708	0	0.973	0	0.589	0.6222	0.5934	0.6129	0.8154	0.55	0.5896	0.8433	0.791	0.6343	0.8284	0.5522	0.5821	0.5448	0.8433	0	0	0	0	0.594	0.6541	0.5431	0.6729	0.6343	0.5495	0.119	0.7097	0.6532	0.5038	91
FAM217B	Candidate gene	0.694	0	0.6119	0	0	0.5714	0.5	0	0	0.3488	0	0	0	0	0	0	0	0	0	0	0.5896	0.1642	0.791	0.6343	0.8284	0.5522	0.5821	0.5448	0.1716	0	0	0	0	0.1353	0.6541	0.5431	0.6729	0.6343	0	0.754	0	0	0.5038	92
METTL5	Candidate gene	0.7015	0.252	0.6119	0	0.5887	0.5714	0	0	0.6875	0.7674	0	0	0	0	0	0	0	0	0	0	0.5896	0.1642	0.791	0.6343	0.1418	0.5522	0.5821	0.5448	0.1716	0	0.5952	0.8095	0.8452	0.594	0.6541	0.5431	0.6729	0.1269	0.8919	0.6508	0.4597	0.6532	0.5038	93
ANKFN1	Candidate gene	0.709	0	0.6119	0	0.5887	0.5714	0.5	0	0	0.7674	0	0	0	0	0	0	0.5934	0	0	0	0.5896	0.8433	0.791	0.6343	0.8284	0.5522	0.5821	0.5448	0.8433	0	0	0	0	0.594	0.6541	0.5431	0.6729	0.6343	0.3874	0.4127	0.3226	0.6532	0.5038	94
CYBRD1	Candidate gene	0.7164	0.8699	0.6119	0.4902	0.5887	0.5714	0.5	0	0.3125	0.7674	0.0833	0	0	0	0.589	0	0.0549	0	0.4615	0	0.5896	0.8433	0.3806	0.6343	0.1418	0.5522	0.5821	0.5448	0.8433	0	0.9524	0.6786	0.3929	0.594	0.6541	0.5431	0.3271	0.2612	0.7748	0.0635	0.871	0.6532	0.5038	95
RECK	Candidate gene	0.7239	0.8699	0.6119	0.6078	0.5887	0.5714	0.5	0	0.6875	0.3488	0	0	0	0.5588	0.589	0.6222	0.5934	0	0.2769	0	0.5896	0.8433	0.791	0.6343	0.3284	0.5522	0.5821	0.5448	0.8433	0.4286	0.7857	1	0.2262	0.594	0.6541	0.5431	0	0.6343	0.4595	0.5794	0.4194	0.6532	0.5038	96
SLC25A33	Candidate gene	0.7313	0.252	0.6119	0.5686	0.5887	0.5714	0.5	0	0	0.7674	0	0	0	0	0	0	0	0	0	0	0.5896	0.8433	0.791	0.6343	0.8284	0.5522	0.5821	0.5448	0.8433	0	0	0	0	0.594	0.6541	0	0.6729	0.6343	0.6306	0.3254	0.8306	0.1694	0.5038	97
SCN9A	Candidate gene	0.7388	0.8699	0.0746	0.4706	0.1613	0.1261	0.5	0.5882	0.6875	0.7674	0.3333	0	0	0	0.589	0	0.5934	0.6129	0.6308	0.225	0.5896	0.8433	0.097	0.6343	0.0746	0.5522	0.5821	0.5448	0.8433	0.9107	0.5119	0.4048	1	0.594	0.6541	0.5431	0.6729	0.6343	0.8378	0.6429	0.4839	0.1694	0.5038	98
ARL5A	Candidate gene	0.7463	0.8699	0.6119	0.902	0.5887	0.5714	0	0.5882	0.6875	0.3488	0	0	0	0	0	0	0	0	0	0	0.5896	0.3881	0.791	0.6343	0.8284	0.5522	0.5821	0.5448	0.4478	0	0.7143	0.2738	0.7262	0.594	0.2707	0.5431	0.3271	0.6343	0.6126	0.6032	0.7742	0.6532	0.5038	99
TMEFF2	Candidate gene	0.7537	0.8699	0.6119	0.4314	0.5887	0.5714	0.5	0	0	0.3488	0	0	0	0.5588	0.589	0	0.5934	0	0.3077	0.95	0.5896	0.8433	0.791	0.6343	0.8284	0.5522	0.5821	0.5448	0.8433	0	0	0	0	0.594	0.6541	0.5431	0.6729	0.6343	0.3423	0.5873	0.4032	0.1694	0.5038	100
RBM43	Candidate gene	0.7612	0.8699	0.6119	0	0.5887	0	0	0	0	0.7674	0	0	0	0	0	0	0.5934	0	0	0	0.5896	0.1642	0.2388	0.1119	0.1418	0.5522	0.5821	0.5448	0.1716	0	0	0	0	0.1579	0.6541	0.5431	0.6729	0.6343	0.6757	0.754	0.9758	0.6532	0.5038	101
OLFML1	Candidate gene	0.7687	0.8699	0.6119	0	0.5887	0.5714	0.5	0	0	0.3488	0	0	0	0	0	0	0	0	0	0	0.5896	0.8433	0.791	0.6343	0.8284	0.5522	0.5821	0.5448	0.8433	0.8929	0.3571	0.0952	0.2024	0.594	0.6541	0.5431	0.215	0.6343	0.8018	0.2778	0.5323	0.6532	0.5038	102
C11orf57	Candidate gene	0.7761	0	0.6119	0	0	0	0.5	0	0	0.7674	0	0	0	0	0	0	0	0	0	0	0.5896	0.1642	0.791	0.6343	0.8284	0.5522	0.5821	0.5448	0.1716	0	0	0	0	0.594	0.6541	0.5431	0.2804	0.6343	0	0.873	0.879	0.0323	0.5038	103
C11orf57	Candidate gene	0.7836	0	0.6119	0	0	0	0.5	0	0	0.7674	0	0	0	0	0	0	0	0	0	0	0.5896	0.1642	0.791	0.6343	0.8284	0.5522	0.5821	0.5448	0.1716	0	0	0	0	0.594	0.6541	0	0	0.6343	0	0	0.879	0.0323	0.5038	104
TTYH1	Candidate gene	0.791	0.252	0.6119	0.9314	0.5887	0.5714	0	0	0	0.7674	0	0	0	0	0.589	0	0	0	0.8462	0	0.5896	0.1642	0.791	0.6343	0.1418	0.5522	0.5821	0.5448	0.1716	0	0	0	0	0.594	0.6541	0	0	0.2164	0	0	0.3468	0.6532	0	105
DCAF17	Candidate gene	0.806	0.8699	0.6119	0.7843	0	0	0.5	0	0	0.7674	0	0	0	0	0	0	0	0.6129	0	0.3	0.5896	0.3507	0.5	0.6343	0.4328	0.5522	0.5821	0.5448	0.3507	0	0.5714	0.631	0.3095	0.594	0.6541	0.5431	0.6729	0.6343	0.991	0.8492	0	0.6532	0.5038	107
BCO2	Candidate gene	0.8134	0.252	0.6119	0.1667	0.5887	0.5714	0.5	0	0.6875	0.7674	0	0.7941	0	0	0.589	0	0.5934	0	0.3538	0	0.5896	0.8433	0.791	0.6343	0.8284	0.5522	0.5821	0.5448	0.8433	0	0	0	0	0.1353	0.3083	0.5431	0.6729	0.6343	0	0.2698	0.9597	0.6532	0.5038	108
CSRNP3	Candidate gene	0.8209	0.8699	0.6119	0.5882	0.5887	0	0.5	0	0	0.7674	0	0	0	0	0	0	0.5934	0	0.7077	0	0.5896	0.8433	0.791	0.6343	0.1418	0.5522	0.5821	0.5448	0.8433	0	0.8095	0.5238	0.4167	0.594	0.6541	0.5431	0.6729	0.6343	0.9009	0.119	0	0.1694	0.5038	109
ORC3	Candidate gene	0.8284	0.626	0.6119	0.4216	0.5887	0.5714	0.5	0	0.6875	0.7674	0.7917	0.7941	0.8378	0.5588	0.589	0.6222	0.5934	0	0.9846	0	0.5896	0.5299	0.5075	0.6343	0.6343	0.5522	0.5821	0.5448	0.5896	0.2857	0.9762	0.4643	0.9762	0.594	0.0526	0.5431	0.215	0.6343	0.2342	0.754	0	0	0.5038	110
SLC35A1	Candidate gene	0.8358	0.252	0.6119	0.8922	0.5887	0.5714	0.5	0	0.6875	0.7674	0.2708	0	0	0.5588	0.589	0	0	0.6129	0.7077	0.75	0.5896	0.8433	0.791	0.6343	0.8284	0.5522	0.5821	0.5448	0.8433	0	0	0	0	0.594	0.0526	0.5431	0	0.6343	0.6486	0.9365	0.2661	0.6532	0.5038	111
NABP1	Candidate gene	0.8433	0.3984	0.6119	0.951	0.5887	0.5714	0	0	0	0.3488	0	0	0	0	0	0	0	0	0	0	0.5896	0.3507	0.791	0.6343	0.3806	0.5522	0.5821	0.5448	0.3507	0	0.6548	0.8571	0.8571	0	0.6541	0.5431	0.215	0.6343	0.3964	0.8492	0	0	0.5038	112
IQCD	Candidate gene	0.8507	0	0.6119	0	0.1371	0.5714	0.5	0	0	0.7674	0	0	0	0	0	0	0	0	0	0	0.5896	0.8433	0.1493	0.6343	0.8284	0.5522	0.5821	0.5448	0.8433	0	0	0	0	0.594	0.6541	0.5431	0.6729	0.1866	0.6667	0.8095	0.8952	0.6532	0.5038	113
RASGEF1B	Candidate gene	0.8582	0.252	0.6119	0.9118	0.5887	0.5714	0	0	0	0.5039	0	0	0	0	0	0	0.5934	0	0	0	0.5896	0.8433	0.791	0.6343	0.8284	0.5522	0.5821	0.5448	0.8433	0	0	0	0	0.594	0.6541	0.5431	0.6729	0.6343	0.8649	0.1587	0.1855	0.6532	0.5038	114
PIH1D2	Candidate gene	0.8657	0	0.6119	0	0.5887	0.5714	0	0	0	0.7674	0	0	0	0	0	0	0	0	0	0	0.5896	0.8433	0.791	0.6343	0.8284	0.5522	0.5821	0.5448	0.8433	0	0	0	0	0.594	0.6541	0.5431	0.6729	0.6343	0.6847	0.754	0.8548	0	0.5038	115
METTL8	Candidate gene	0.8731	0.0813	0.6119	0	0.5887	0.5714	0.5	0	0	0.2558	0	0	0	0	0	0	0	0	0	0	0.5896	0.1642	0.0746	0.6343	0.8284	0.5522	0.5821	0.5448	0.1716	0	0.7738	0.7262	0.869	0.594	0.6541	0.5431	0	0.6343	1	0.8175	0.6855	0.6532	0.5038	116
IL22RA1	Candidate gene	0.8806	0.8699	0.6119	0.7745	0.5887	0.5714	0.5	0	0.6875	0.2171	0	0	0.3514	0.5588	0.589	0.6222	0.5934	0	0.9231	0.75	0.5896	0.8433	0.791	0.6343	0.8284	0.5522	0.5821	0.5448	0.8433	0	0.25	0.25	0.9167	0.594	0.6541	0.5431	0.6729	0.6343	0.3604	0.754	0.9194	0.6532	0.5038	117
C12orf50	Candidate gene	0.8881	0.8699	0.6119	0	0.5887	0	0	0	0	0	0	0	0	0	0	0	0.5934	0	0	0	0.5896	0.8433	0.791	0.6343	0.8284	0.5522	0.5821	0.5448	0.8433	0	0	0	0	0.594	0.6541	0	0.6729	0.6343	0.1802	0.754	0.2903	0.6532	0.5038	118
DZANK1	Candidate gene	0.8955	0.8699	0.6119	0	0.5887	0.5714	0.5	0	0	0.7674	0	0	0	0	0	0	0	0	0	0	0.5896	0.3134	0.791	0.6343	0.8284	0.5522	0.5821	0.5448	0.3134	0	0.5	0.9405	0.4405	0.594	0.6541	0.5431	0.6729	0.6343	0.5045	0.754	0	0	0.5038	119
SERTM1	Candidate gene	0.903	0.8699	0.6119	0.1961	0	0	0.5	0	0	0	0	0	0	0	0	0	0	0	0	0	0.5896	0.1642	0.791	0.6343	0.8284	0.5522	0.5821	0.5448	0.1716	0	0	0	0	0.594	0.6541	0	0.6729	0.6343	0	0.873	0	0	0.5038	120
ODF2	Candidate gene	0.9104	0.4878	0.194	0.3039	0.5887	0	0.5	0	0.6875	0.7674	0.7917	0	0	0.5588	0.589	0.6222	0.5934	0	0.5846	0	0.5896	0.2388	0.791	0.6343	0.2164	0.5522	0.0896	0.5448	0.1716	0.9821	1	0.881	0.1667	0.594	0.6541	0.5431	0.6729	0.1045	0.973	0.754	0.2823	0.6532	0.5038	121
PIH1D2	Candidate gene	0.9179	0	0.6119	0	0.5887	0.5714	0	0	0	0.7674	0	0	0	0	0	0	0	0	0	0	0.5896	0.8433	0.791	0.6343	0.8284	0.5522	0.5821	0.5448	0.8433	0	0	0	0	0.594	0.6541	0	0	0.6343	0	0	0.8548	0	0.5038	122
SPACA1	Candidate gene	0.9254	0.8699	0.6119	0.8824	0	0	0.5	0	0	0.7674	0	0	0	0	0	0	0.5934	0	0.9231	0	0.5896	0.8433	0.791	0.6343	0.8284	0.5522	0.5821	0.5448	0.8433	0	0.6429	0.1667	0.6786	0.594	0.6541	0.5431	0.6729	0.6343	0.8559	0.246	0.8548	0.6532	0.5038	123
CDH26	Candidate gene	0.9328	0.8699	0.6119	0.3725	0.5887	0.5714	0.5	0	0	0.4574	0	0	0	0	0	0	0.5934	0	0	0	0.5896	0.8433	0.791	0.6343	0.8284	0.5522	0.5821	0.5448	0.8433	0	0	0	0	0.594	0.6541	0.5431	0.6729	0.6343	0.8198	0.2778	0.9919	0.6532	0.5038	124
TMEM132E	Candidate gene	0.9403	0.8699	0.6119	0	0.5887	0	0.5	0	0	0.7674	0	0	0	0	0	0	0.5934	0	0	0	0.5896	0.8433	0.791	0.6343	0.8284	0.5522	0.5821	0.5448	0.8433	0	0	0	0	0.594	0.6541	0.5431	0.6729	0.6343	0.982	0.0635	0.4274	0.6532	0.5038	125
UHRF1BP1L	Candidate gene	0.9478	0	0.6119	0.9706	0.5887	0.5714	0.5	0	0	0.3488	0	0	0	0	0	0	0	0	0	0	0.5896	0.8433	0.791	0.6343	0.8284	0.5522	0.5821	0.5448	0.8433	0	0.8333	0.369	0.7619	0.594	0.6541	0.5431	0.6729	0.6343	0.8108	0.9048	0.129	0.6532	0.5038	126
GJB7	Candidate gene	0.9552	0.8699	0.6119	0	0.5887	0.5714	0.5	0	0	0.7674	0.2292	0.3235	0	0	0.589	0	0	0	0	0	0.5896	0.8433	0.791	0.6343	0.8284	0.5522	0.5821	0.0597	0.8433	0	0	0	0	0.0977	0.2256	0.5431	0.6729	0.6343	0.9459	0.9603	0.8387	0.6532	0.5038	127
TEX12	Candidate gene	0.9627	0.8699	0.6119	0.8137	0	0.5714	0	0	0	0.7674	0.7917	0	0	0	0	0	0	0	0.9231	0	0.5896	0.8433	0.791	0.6343	0.8284	0.5522	0.5821	0.5448	0.8433	0	0.7381	0.0714	0.8333	0.594	0.6541	0.5431	0	0.6343	0.7297	0.9683	0.7661	0.6532	0.5038	128
CCDC129	Candidate gene	0.9701	0	0.6119	0	0	0.5714	0.5	0	0	0	0	0	0	0	0	0	0.5934	0	0	0	0.5896	0.8433	0.791	0.6343	0.8284	0.5522	0.5821	0.5448	0.8433	0	0	0	0	0.594	0.6541	0.5431	0.6729	0.2687	0.9369	0.9365	0.9516	0.6532	0.5038	129
DEPDC4	Candidate gene	0.9776	0.8699	0.6119	0	0.5887	0.5714	0	0	0	0.7674	0	0	0	0	0	0	0	0	0	0	0.5896	0.8433	0.791	0.6343	0.8284	0.5522	0.5821	0.5448	0.8433	0	0	0	0	0.594	0.6541	0.5431	0.6729	0.6343	0.8288	0.9762	0.9032	0.6532	0.5038	130
C6orf163	Candidate gene	0.9851	0.8699	0.6119	0	0	0	0.5	0	0	0	0	0	0	0	0	0	0	0	0	0	0.5896	0.8433	0.791	0.6343	0.8284	0.5522	0.5821	0.5448	0.8433	0	0	0	0	0.594	0.6541	0.5431	0	0.6343	0	0	1	0	0.5038	131
OR6A2	Candidate gene	0.9925	0.8699	0.6119	0.9804	0.5887	0.5714	0.5	0	0	0.7674	0.7917	0.7941	0	0	0.589	0.6222	0	0	0	0	0.5896	0.8433	0.791	0.6343	0.8284	0.5522	0.5821	0.5448	0.8433	0	0	0	0	0.594	0	0	0	0.6343	0.7658	1	0.6774	0	0.5038	132
SYCP2	Candidate gene	1	0.626	0.6119	0.7549	0.5887	0	0	0	0	0.5039	0.7917	0	0	0	0.589	0	0.5934	0	0.9846	0	0.5896	0.8433	0.791	0.6343	0.8284	0.5522	0.5821	0.5448	0.8433	1	0.6071	0.9643	0.9405	0.594	0.0526	0.5431	0.6729	0.6343	0	0.9365	0.8065	0.6532	0.5038	133

## Sheet: Halter_Skeletal_Muscle
Gene name	Group	P-value	Annotation â€“ Gene Ontology	Annotation â€“ UniProt	Text-mining	Annotation â€“ InterPro	Annotation â€“ Pfam	Annotation â€“ SIMAP (localization)	Annotation â€“ DrugBank	Annotation â€“ Stitch	Annotation â€“ RGD ChEBI	Annotation â€“ Reactome	Annotation â€“ WikiPathways	Annotation â€“ RGD pathways	Annotation â€“ BioCarta	Annotation â€“ CPDB	Annotation â€“ hiPathDB	Annotation â€“ GAD	Annotation â€“ OMIM	Annotation â€“ RGD MP	Annotation â€“ RGD RDO	Interaction â€“ String	Interaction â€“ BioGrid	Interaction â€“ I2D	Interaction â€“ IntAct	Interaction â€“ iRefIndex	Interaction â€“ Mint	Interaction â€“ HPRD	Interaction â€“ MIPS	Interaction â€“ GeneRIF	Expression â€“ Su et al (2002)	Expression â€“ Su et al (2004)	Expression â€“ CMAP	Expression â€“ Lukk et al	Annotation â€“ PaGenBase	Annotation â€“ CGAP	Annotation â€“ GNF	Annotation â€“ eGenetics	Blast	Precalculated â€“ Ouzounis	Precalculated â€“ Prospectr	Precalculated â€“ HaploPred	Annotation â€“ Aura	Annotation â€“ mirZ	id
ACTA1	Training gene	0.0106	0.0114	0.0106	0.0667	0.0333	0.0465	0	0.1111	0	0.087	0	0.0345	0	0.0333	0.125	0.35	0.1935	0.0435	0.0536	0.0345	0.0851	0.0532	0.0638	0.0426	0.0532	0.0319	0.0426	0.5532	0.0532	0.0364	0.0141	0.1408	0.0141	0.0109	0.2234	0.0238	0	0.0638	0.0875	0.6667	0.0964	0.6098	0.5	0
GYS1	Training gene	0.0213	0.7727	0.0638	0.08	0.0778	0.0814	0	0	0.098	0.163	0.0333	0.1724	0.069	0.0667	0.0357	0.025	0.0323	0.2609	0.1071	0.5172	0.1702	0.0532	0.0638	0.0426	0.0532	0.0319	0.0426	0.5532	0.0532	0.0545	0.0563	0.169	0.0845	0.0543	0.0851	0.1071	0.0274	0.0638	0.1125	0.2556	0.4699	0.2073	0.5	1
ACTB	Training gene	0.0319	0.0227	0.0532	0.12	0.0333	0.0465	0	0	0	0.1304	0.1333	0.069	0.3103	0.1333	0.0714	0.125	0.629	0.1739	0.0357	0.3448	0.0213	0.0532	0.0638	0.0426	0.0532	0.0319	0.0426	0.0106	0.0532	0.1091	0.5352	0.3099	0.1268	0.1848	0.0638	0.1071	0.3973	0.0638	0.075	0.5667	0.012	0.1463	0.5	2
RYR1	Training gene	0.0426	0.0455	0.234	0.1067	0.0556	0.0349	0.2	0.2222	0.0196	0.3913	0.2	0.1034	0.2759	0	0.0179	0.275	0.0161	0.087	0.0893	0.1034	0.1277	0.0532	0.0638	0.0426	0.0532	0.0319	0.0426	0.5532	0.0532	0.1273	0.0282	0.1268	0.0423	0.087	0.2553	0.0476	0.1781	0.0638	0	0.0333	0.6506	0.6098	0.5	3
SLC2A4	Training gene	0.0532	0.1136	0.0851	0.1333	0.1	0.1395	0.2	0	0.0392	0.1957	0.0667	0.1379	0.0345	0.1	0.0536	0.05	0.2581	0.3043	0.0714	0.3793	0.1702	0.0532	0.0638	0.0426	0.0532	0.0319	0.0426	0.5532	0.0532	0.0727	0.4789	0.1127	0.1127	0.0543	0.1489	0.5952	0.0411	0.0638	0.1875	0.5667	0.5542	0.6098	0.5	4
MYH1	Training gene	0.0638	0.0795	0.0745	0.0533	0.1222	0.093	0.2	0	0	0.0326	0	0	0.1724	0	0.1429	0.075	0.2258	0	0.2321	0	0.0213	0.0532	0.0638	0.0426	0.0532	0.5638	0.0426	0.5532	0.0532	0	0.0423	0.0141	0.0282	0.0326	0.2553	0.1667	0.0959	0.0638	0.4125	0.7111	0.1807	0.6098	0.5	5
MSTN	Training gene	0.0745	0.1023	0.7021	0.16	0.0889	0.1279	0.7	0	0.0784	0.0543	0	0.2414	0	0	0.25	0	0.2097	0.2174	0.1607	0.4483	0.1702	0.0532	0.0638	0.6489	0.0532	0.5638	0.0426	0.5532	0.0532	0.1636	0.2817	0.0986	0.0986	0.0217	0.6383	0.5952	0.0137	0.0638	0.225	0.6556	0.1205	0.6098	0.5	6
MICAL1	Training gene	0.0851	0.0568	0.0319	0.0133	0.0111	0.0116	0.2	0	0	0.3043	0	0	0	0	0	0	0	0	0	0	0.266	0.0532	0.0638	0.6489	0.0532	0.0319	0.0426	0.0106	0.0532	0	0.662	0.3662	0.1408	0.5978	0.6383	0.5952	0.2329	0.0638	0.8625	0.5667	0.9518	0.0732	0.5	7
MICAL2	Training gene	0.0957	0.0568	0.0319	0.0267	0.0222	0.0233	0	0	0	0.25	0	0	0	0	0	0	0.629	0	0	0	0.266	0.0532	0.0638	0.6489	0.0532	0.5638	0.6383	0.5532	0.0532	0.2	0.5634	0.338	0.169	0.5978	0.0213	0.5952	0.2603	0.0638	0.55	0.1333	0.4578	0.0732	0.5	8
MYH11	Candidate gene	0.1064	0.0341	0.0213	0.2667	0.1333	0.093	0.2	0.6667	0.6275	0.0109	0.3667	0	0.1724	0.6333	0.1429	0.075	0.629	0.6522	0.2143	0.2759	0.0638	0.1596	0.1277	0.0957	0.1383	0.5638	0.1064	0.5532	0.1277	0.6364	0.9859	0.0423	0.4648	0.5978	0.6383	0.5952	0.4521	0.0638	0.0625	0.0333	0.1325	0.6098	0.5	9
SEPN1	Training gene	0.117	0.4432	0.1383	0.0933	0.1556	0.5698	0.7	0	0.1176	0.4674	0	0	0	0	0.625	0	0	0.1304	0.1964	0.069	0.0851	0.0532	0.0638	0.0426	0.0532	0.5638	0.6383	0.5532	0.0532	0	0	0	0	0.5978	0.1489	0	0.0548	0.0638	0.2125	0.4111	0.7349	0.0732	0.5	10
PLN	Candidate gene	0.1277	0.2159	0.2021	0.4133	0.5778	0.5698	0.7	0	0.1373	0.2174	0	0.3103	0.3793	0.6333	0.625	0.25	0.1129	0.6522	0.2679	0.2759	0.0745	0.8617	0.3298	0.6489	0.3723	0.5638	0.1489	0.5532	0.5106	0.0909	0.3662	0.0845	0.0563	0.0543	0.0426	0.1071	0.2466	0.6489	0	0.8889	0.241	0.6098	0.5	11
NR0B2	Candidate gene	0.1383	0.4432	0.1915	0.3067	0.5778	0.5698	0.7	0	0.6275	0.0543	0.7333	0.7241	0.1034	0.6333	0.625	0.675	0.1129	0.6522	0.6786	0.7241	0.2128	0.6277	0.4574	0.2447	0.5319	0.5638	0.6383	0.5532	0.6064	0.6909	0.4225	0.1831	0.6761	0.5978	0.6383	0.5952	0.8082	0.6489	0.1	0.6778	0.1687	0.6098	0.5	12
KIFC3	Candidate gene	0.1489	0.2727	0.2872	0.1467	0.5778	0.5698	0.2	0	0.6275	0.5978	0.1667	0	0.7931	0.6333	0.625	0.675	0.629	0	0	0	0.6489	0.3511	0.2234	0.6489	0.3723	0.5638	0.117	0.5532	0.3404	0.6545	0.6479	0.6761	0.7324	0.5978	0.6383	0.5952	0	0.1809	0.3375	0.1333	0.5783	0.6098	0.5	13
PDS5B	Candidate gene	0.1596	0.4432	0.7021	0.72	0.5778	0	0	0	0.6275	0.3696	0.7333	0	0	0	0.625	0	0.629	0	0.4286	0	0.6489	0.4894	0.4574	0.6489	0.2766	0.5638	0.6383	0.5532	0.5319	0.6182	0.2535	0.2254	0.5775	0.5978	0.6383	0.5952	0.5342	0.6489	0.4375	0.6222	0.3253	0.0732	0.5	14
SRPK1	Candidate gene	0.1702	0.4432	0.3723	0.68	0.5778	0.5698	0.2	0	0.6275	0.5652	0	0.7241	0	0	0.625	0	0.629	0	0	0	0.6489	0.3936	0.5319	0.2872	0.6277	0.5638	0.6383	0.0745	0.4574	0.3091	0.4085	0.2958	0.2113	0.5978	0.6383	0.5952	0.7671	0.6489	0.5125	0.1333	0.4337	0.6098	0.5	15
WASF2	Candidate gene	0.1809	0.1364	0.1596	0.5333	0.5778	0.5698	0.7	0	0.6275	0.8261	0.2667	0.3448	0.6897	0.6333	0.625	0.2	0.629	0	0.1786	0	0.0106	0.5213	0.2979	0.6489	0.266	0.5638	0.1596	0.0319	0.234	0	0.9155	0.5775	0.2535	0.5978	0.6383	0.1071	0	0.6489	0.35	0.4778	0.3735	0.6098	0.5	16
NF1	Candidate gene	0.1915	0.125	0.1064	0.2133	0.5778	0.5698	0.2	0	0.0588	0.4674	0	0.7241	0.7931	0.2333	0.2321	0.325	0.629	0.6522	0.125	0.2069	0.1489	0.2979	0.2766	0.1702	0.3511	0.5638	0.6383	0.5532	0.383	0.3818	0.1831	0.8028	0.9859	0.5978	0.6383	0.5952	0.3836	0.6489	0	0.0111	0.2771	0.6098	0.5	17
FGR	Candidate gene	0.2021	0.6818	0.2872	0.5067	0.5778	0.5698	0	0	0.1765	0.6304	0.3333	0.2759	0.6207	0	0.625	0.675	0.629	0	0.6071	0	0.2979	0.3936	0.4255	0.1489	0.2447	0.5638	0.2128	0.5532	0.2979	0.7455	0.8592	0.4366	0.3521	0.1522	0.6383	0.5952	0	0.6489	0.3125	0.1333	0.3133	0.6098	0.5	18
SLC9A1	Candidate gene	0.2128	0.1818	0.2234	0.3867	0.5778	0.5698	0.2	0.6667	0.2157	0.0217	0.2333	0.3448	0.2414	0.1667	0.625	0.15	0.629	0	0.4643	0.2414	0.6489	0.3298	0.266	0.6489	0.2128	0.1064	0.6383	0.5532	0.2553	0.8545	0.8451	0.831	0.9437	0.5978	0.6383	0.5952	0.6438	0.1702	0.1375	0.0667	0.4096	0.6098	0.5	19
CBX1	Candidate gene	0.2234	0.625	0.7021	0.6133	0.5778	0.5698	0	0	0.6275	0.4239	0	0	0	0	0	0	0	0	0.6964	0	0.6489	0.7021	0.3936	0.2447	0.6489	0.5638	0.6383	0.5532	0.7234	0.4545	0.6338	0.1972	0.6197	0.5978	0.234	0.5952	0.0548	0.6489	0.5875	0.3444	0.6747	0.0732	0.5	20
PML	Candidate gene	0.234	0.5568	0.3723	0.2267	0.5778	0.5698	0.2	0	0.6275	0.5326	0.7333	0.7241	0.5517	0.6333	0.0893	0.675	0.629	0.6522	0.7143	0	0.2447	0.5851	0.4149	0.1809	0.4255	0.117	0.2021	0.5532	0.5426	0.3636	0.1127	0.493	0.3239	0.5978	0.6383	0.5952	0.6986	0.6489	0.0375	0.8222	0.7831	0.1829	0.5	21
COX7A1	Training gene	0.2447	0.75	0.7021	0.04	0.1111	0.1163	0.7	0.3333	0.6275	0.2717	0	0.4138	0.5172	0	0.625	0	0.629	0	0.25	0	0.6489	0.8617	0.8085	0.6489	0.8298	0.5638	0.6383	0.5532	0.8723	0.0182	0.0704	0.0282	0.0704	0.0761	0.0745	0.0119	0.1096	0.1277	0.925	0.9889	0.8072	0.6098	0.5	22
NFIC	Candidate gene	0.2553	0.8977	0.7021	0.2533	0.5778	0.5698	0	0	0.6275	0.25	0	0	0.7931	0.6333	0.625	0.675	0.629	0	0.4821	0	0.6489	0.2766	0.6064	0.2021	0.5851	0.5638	0.6383	0.5532	0.3404	0.5455	0.0986	0.7887	0.3662	0.5978	0.1489	0.0476	0.4384	0.6489	0.025	0.1333	0.3494	0.6098	0.5	23
PECAM1	Candidate gene	0.266	0.4432	0.7021	0.28	0	0.5698	0.7	0	0	0.1522	0	0	0.4483	0.2	0.1964	0.175	0.1129	0	0.1429	0.1724	0.6489	0.6915	0.8085	0.6489	0.3085	0.5638	0.1915	0.5532	0.5851	0	0	0	0	0.5978	0.6383	0	0	0.6489	0	0	0.6024	0.6098	0.5	24
AATF	Candidate gene	0.2766	0.1477	0.7021	0.5733	0.5778	0.5698	0	0	0	0.8261	0.7333	0	0	0.6333	0.625	0.675	0.629	0	0.5536	0	0.234	0.266	0.4468	0.266	0.4574	0.5638	0.266	0.5532	0.3404	0.3455	0	0	0	0.5978	0.6383	0	0.6986	0.6489	0.6125	0.4111	0.1566	0.6098	0.5	25
PPM1D	Candidate gene	0.2872	0.7614	0.7021	0.48	0.5778	0.5698	0	0	0.6275	0.4239	0	0	0.7931	0.6333	0.625	0.675	0.629	0.6522	0.5536	0.7241	0.6489	0.3511	0.1489	0.6489	0.4043	0.0745	0.1702	0.0532	0.5106	0.2909	0.3521	0.3521	0.662	0.5978	0.6383	0.5952	0.9178	0.6489	0.2	0.4111	0.2169	0.6098	0.5	26
APPBP2	Candidate gene	0.2979	0.4432	0.2872	0.9733	0.5778	0.5698	0	0	0	0.3043	0	0	0	0.6333	0.625	0.675	0.629	0	0	0	0.6489	0.6489	0.3723	0.6489	0.617	0.5638	0.6383	0.5532	0.6277	0.4909	0.3944	0.2394	0.8592	0.5978	0.6383	0.5952	0.4932	0.2553	0.6625	0.3556	0.1446	0.0732	0.5	27
MTHFD1L	Candidate gene	0.3085	0.7273	0.7021	0.2	0.5778	0.5698	0.7	0	0.6275	0.6304	0	0.7241	0.4138	0	0.625	0.675	0.629	0	0.5536	0	0.6489	0.3723	0.1809	0.234	0.4681	0.5638	0.6383	0.5532	0.3936	0	0	0	0	0.5978	0.6383	0.5952	0	0.1915	0.175	0.1333	0.9036	0.6098	0.5	28
ALCAM	Candidate gene	0.3191	0.625	0.7021	0.44	0.5778	0.5698	0.7	0	0.6275	0.1196	0.3667	0	0	0.6333	0.625	0.675	0.1129	0	0.9464	0	0.6489	0.4468	0.5	0.6489	0.2234	0.5638	0.1277	0.5532	0.3404	0.8364	0.7042	0.7606	0.3944	0.5978	0.6383	0.5952	0.2192	0.2234	0.05	0.2778	0.2048	0.0732	0.5	29
KAZN	Candidate gene	0.3298	0.2727	0.2872	0.64	0.5778	0.5698	0.2	0	0	0.4239	0	0	0	0	0	0	0.629	0	0.9464	0	0.6489	0.3085	0.8085	0.6489	0.3085	0.5638	0.6383	0.5532	0.2872	0.6	0.5493	0.6056	0.338	0.5978	0.6383	0.5952	0.3288	0.6489	0	0.3	0	0	0.5	30
ATPIF1	Candidate gene	0.3404	0.4432	0.7021	0.2933	0.5778	0.5698	0.2	0	0.6275	0.4239	0	0.4138	0	0	0.625	0	0.629	0	0.7679	0	0.6489	0.5532	0.5213	0.6489	0.4362	0.0957	0.6383	0.5532	0.5638	0	0.9014	0.5211	0.7746	0.5978	0.2553	0.1071	0.1918	0.2021	0.575	0.5111	0.7349	0.0732	0.5	31
SESN2	Candidate gene	0.3511	0.2727	0.7021	0.92	0.5778	0.5698	0.2	0	0.6275	0.25	0	0	0.7931	0	0.625	0.675	0	0	0.3036	0	0.6489	0.4468	0.234	0.6489	0.3085	0.5638	0.6383	0.5532	0.4362	0	0	0	0	0.5978	0.6383	0.5952	0.1233	0.6489	0.325	0.1333	0.3012	0.6098	0.5	32
RPA2	Candidate gene	0.3617	0.625	0.7021	0.4933	0.5778	0.5698	0.7	0	0.6275	0.087	0.7333	0.7241	0.9655	0.6333	0.625	0.675	0.629	0	0	0	0.1383	0.6383	0.4787	0.1809	0.5638	0.5638	0.2553	0.0851	0.6489	0.6727	0.6197	0.2535	0.6479	0.5978	0.6383	0.5952	0	0.6489	0.8875	0.4111	0.0602	0.6098	0.5	33
CNTNAP2	Candidate gene	0.3723	0.4432	0.7021	0.3467	0.1444	0.5698	0.7	0	0.6275	0.3043	0	0	0	0	0.625	0.675	0.1129	0.6522	0.6607	0.8966	0.6489	0.5	0.5532	0.1489	0.2553	0.5638	0.1809	0.5532	0.3936	0.8909	0.4507	0.2676	0.7606	0.1739	0.6383	0.5952	0.7534	0.6489	0.375	0.6444	0.3373	0.6098	0.5	34
NDE1	Candidate gene	0.383	0.1705	0.2872	0.56	0.5778	0.5698	0.2	0	0.6275	0.3043	0.7333	0	0	0.6333	0.625	0.675	0.629	0.6522	0.9464	0	0.6489	0.4468	0.2553	0.6489	0.5532	0.0745	0.6383	0.5532	0.6596	0	0.6056	0.9577	0.5352	0.5978	0.1489	0.5952	0.1644	0.1596	0.8375	0.4111	0.3614	0.1829	0.5	35
EYA3	Candidate gene	0.3936	0.5568	0.3723	0.88	0.5778	0	0	0	0.6275	0.5326	0	0	0	0	0	0	0	0	0.3571	0	0.6489	0.4468	0.5	0.6489	0.5106	0.5638	0.6383	0.5532	0.6277	0.8727	0.5211	0.4648	0.8732	0.5978	0.6383	0.5952	0	0.6489	0.275	0.4778	0.0843	0.6098	0.5	36
SYTL1	Candidate gene	0.4043	0.4432	0.7021	0.8133	0.5778	0.5698	0	0	0	0.4674	0	0	0	0	0.625	0	0	0	0.6429	0	0.1915	0.2128	0.3085	0.6489	0.1915	0.5638	0.1277	0.5532	0.266	0	0	0	0	0.5978	0.6383	0	0.3288	0.6489	0.7875	0.5667	0.4458	0	0.5	37
RCC1	Candidate gene	0.4149	0.3523	0.2128	0.7467	0.5778	0.5698	0.7	0	0.6275	0.2174	0.7333	0	0	0.6333	0.625	0.675	0	0	0	0	0.6489	0.6809	0.2021	0.2021	0.6064	0.1277	0.2447	0.5532	0.6915	0.1818	0.1549	0.9437	0.2394	0.5978	0.6383	0.5952	0	0.6489	0.825	0.4111	0	0.6098	0.5	38
CACNA2D1	Candidate gene	0.4255	0.7386	0.7021	0.3333	0.5778	0.5698	0.7	0.6667	0.2353	0.1087	0	0.7241	0.3448	0	0.625	0.3	0.629	0	0.2857	0	0.117	0.8617	0.3298	0.6489	0.8298	0.5638	0.6383	0.5532	0.8723	0.7818	0.1268	0.5493	0.1549	0.0978	0.6383	0.5952	0.8082	0.6489	0.525	0.0667	0.506	0.6098	0.5	39
BCAS3	Candidate gene	0.4362	0.4432	0.7021	0.6667	0.5778	0.5698	0.2	0	0.6275	0.5978	0	0	0	0	0	0	0.629	0	0	0.7241	0.6489	0.2128	0.3298	0.117	0.1596	0.5638	0.6383	0.5532	0.1915	0	0.2676	0.9014	0.8169	0.5978	0.6383	0.5952	0	0.1489	0.675	0.7444	0.253	0.6098	0.5	40
NUDC	Candidate gene	0.4468	0.2727	0.2872	0.6267	0.5778	0.5698	0.2	0	0.6275	0.8261	0.7333	0	0.9655	0.6333	0.625	0.675	0	0	0	0	0.6489	0.5319	0.2128	0.2234	0.3936	0.5638	0.6383	0.5532	0.4681	0	0	0	0	0.5978	0.1489	0	0.274	0.6489	0.7375	0.2556	0.4217	0.6098	0.5	41
PTPN18	Candidate gene	0.4574	0.2727	0.3723	0.76	0.5778	0.5698	0.7	0	0.6275	0.4674	0	0.7241	0	0	0.625	0	0	0	0	0	0.6489	0.117	0.383	0.117	0.1596	0.5638	0.234	0.5532	0.1915	0.4727	0.338	0.7746	0.2254	0.5978	0.1489	0.5952	0.6438	0.6489	0.625	0.8222	0.9277	0.6098	0.5	42
CHIC2	Candidate gene	0.4681	0.4432	0.7021	0.9333	0.5778	0.5698	0.2	0	0.6275	0.5326	0	0	0	0	0	0	0	0.6522	0	0.7241	0.6489	0.6064	0.5957	0.6489	0.5851	0.5638	0.6383	0.5532	0.5957	0	0.9296	0.507	0.2958	0.5978	0.6383	0.5952	0.6986	0.6489	0	0.7222	0.1928	0.6098	0.5	43
CDC42EP4	Candidate gene	0.4787	0.6818	0.2872	0	0.5778	0.5698	0.7	0	0	0.8261	0	0	0	0	0	0	0	0	0	0	0.6489	0.3085	0.5426	0.6489	0.4681	0.5638	0.6383	0.5532	0.3085	0.2727	0.2113	0.8451	0.4225	0.5978	0.6383	0.5952	0.4932	0.6489	0.65	0.8222	0.7108	0.6098	0.5	44
CCL2	Candidate gene	0.4894	0.7045	0.7021	0.1867	0.5778	0.5698	0.7	0.6667	0.6275	0.1413	0.1	0.7241	0.6552	0.6333	0.0893	0.675	0.2419	0.6522	0	0.4828	0.0532	0.8617	0.617	0.6489	0.6383	0.5638	0.6383	0.5532	0.8723	0.9091	0.9577	0.4507	0.7887	0.1957	0.0213	0.1071	0.4932	0.6489	0	0.2222	0.3735	0.6098	0.5	45
MAP3K6	Candidate gene	0.5	0.8977	0.7021	0.1733	0.5778	0.5698	0.2	0	0	0.6522	0	0.2069	0.7931	0.6333	0.1786	0.675	0.629	0	0.8214	0	0.6489	0.1277	0.1702	0.0851	0.2021	0.5638	0.6383	0.5532	0.1489	0	0.8732	0.9296	0.4789	0.5978	0.6383	0.5952	0.1233	0.6489	0.4875	0.5667	0.7711	0.0732	0.5	46
FZR1	Candidate gene	0.5106	0.4432	0.3723	0.7067	0.5778	0.5698	0	0	0.6275	0.8261	0.7333	0	0.9655	0.6333	0.625	0.675	0.629	0	0.375	0	0.6489	0.617	0.2872	0.2766	0.5426	0.5638	0.6383	0.5532	0.617	0.7273	0.493	1	0.4366	0.5978	0.6383	0.5952	0.4932	0.6489	0.2375	0.1889	0.0482	0.6098	0.5	47
PHACTR4	Candidate gene	0.5213	0.0909	0.1809	0.8667	0.5778	0.5698	0	0	0	0.8261	0	0	0	0	0	0	0	0	0.7143	0	0.1064	0.2872	0.0638	0.117	0.117	0.5638	0.0957	0.5532	0.117	0.5091	0.3239	0.4789	1	0.5978	0.6383	0.5952	0	0.6489	0	0	0.9759	0.6098	0.5	48
TIMP2	Candidate gene	0.5319	0.625	0.7021	0.4667	0.5778	0.5698	0.7	0	0.6275	0.163	0.7333	0.7241	0	0.6333	0.625	0.675	0.1129	0	0.7679	0.1379	0.2021	0.6596	0.3617	0.6489	0.4894	0.5638	0.6383	0.5532	0.6596	0.9636	0.9718	0.9155	0.7042	0.5978	0.0426	0.5952	0.3288	0.6489	0.125	0.2222	0.5663	0.0732	0.5	49
FAM76A	Candidate gene	0.5426	0	0.7021	0	0	0	0.2	0	0	0.5326	0	0	0	0	0	0	0.629	0	0	0	0.6489	0.2128	0.8085	0.6489	0.8298	0.5638	0.6383	0.5532	0.1915	0.7091	0.4648	0.662	0.7183	0.5978	0.0213	0.5952	0.589	0.6489	0.875	0.4111	0.5181	0.6098	0.5	50
CA4	Candidate gene	0.5532	0.7159	0.1064	0.5467	0.5778	0.5698	0.7	0.6667	0.2549	0.0543	0.4333	0	0	0	0.625	0.675	0.629	0.6522	0.5179	0.7241	0.2872	0.8617	0.8085	0.6489	0.8298	0.5638	0.6383	0.5532	0.8723	0.1455	0.7606	0.5352	0.507	0.5978	0.6383	0.1786	0.8082	0.6489	0.7	0.0667	0.8916	0.6098	0.5	51
DNAJC8	Candidate gene	0.5638	0.8977	0.7021	0.24	0.5778	0.5698	0.2	0	0	0.2174	0.7333	0.7241	0	0.6333	0.625	0.675	0.629	0	0	0	0.6489	0.383	0.5532	0.6489	0.5745	0.5638	0.6383	0.0638	0.4681	0	0	0	0	0.5978	0.6383	0	0.2055	0.6489	0.3	0.9	0.8434	0.1585	0.5	52
STIM2	Candidate gene	0.5745	0.4432	0.7021	0.6933	0.5778	0.5698	0.2	0	0.6275	0.8261	0	0	0.1379	0	0.625	0	0.629	0	0.5	0	0.6489	0.3298	0.1489	0.117	0.1277	0.5638	0.6383	0.5532	0.1383	0	0	0	0	0.5978	0.6383	0.5952	0.589	0.6489	0.95	0.9111	0.7349	0.6098	0.5	53
LOXL1	Candidate gene	0.5851	0.7955	0.7021	0.8267	0.5778	0.5698	0.7	0	0.6275	0.0543	0.7333	0	0	0	0.625	0	0.1129	0.6522	1	0.7241	0.6489	0.4468	0.8085	0.6489	0.8298	0.5638	0.6383	0.5532	0.5638	0.4182	0.831	0.8169	0.3099	0.1522	0.6383	0.1071	0.1507	0.6489	0.6875	0.6333	0.0723	0.6098	0.5	54
EMX2	Candidate gene	0.5957	0.625	0.7021	0.4533	0.5778	0.5698	0.7	0	0.6275	0.8261	0	0	0	0	0	0	0.629	0.6522	0.5893	0.5517	0.2234	0.8617	0.5	0.6489	0.8298	0.5638	0.6383	0.5532	0.8723	0.9455	0.8873	0.0704	0.6056	0.5978	0.1489	0.5952	0	0.6489	0.0125	0.7222	0.0361	0.6098	0.5	55
GGNBP2	Candidate gene	0.6064	0.2727	0.7021	0.5867	0.5778	0	0	0	0	0.8261	0	0	0	0	0	0	0	0	0	0	0.6489	0.2128	0.8085	0.6489	0.3085	0.5638	0.6383	0.5532	0.3404	0	0	0	0	0.5978	0.1489	0	0	0.2234	0	0	0.4819	0.6098	0.5	56
STX12	Candidate gene	0.617	0.4432	0.7021	0.9067	0.5778	0.5698	0.2	0	0	0.8261	0.7333	0	0	0	0.625	0	0	0	0	0	0.6489	0.5532	0.3936	0.6489	0.5106	0.5638	0.2234	0.0426	0.4894	0.5273	0.8169	0.2817	0.2817	0.5978	0.6383	0.5952	0	0.6489	0.85	0.7667	0.2892	0.6098	0.5	57
GGNBP2	Candidate gene	0.6277	0.2727	0.7021	0.5867	0.5778	0	0.2	0	0	0.8261	0	0	0	0	0	0	0	0	0	0	0.6489	0.2128	0.8085	0.6489	0.3085	0.5638	0.6383	0.5532	0.3404	0	0.7465	0.3239	0.4085	0.5978	0.1489	0.5952	0.4932	0.2234	0.25	0.9667	0.4819	0.6098	0.5	58
PTAFR	Candidate gene	0.6383	0.8977	0.7021	0.36	0.5778	0.5698	0.7	0	0.1569	0.6304	0.7333	0.7241	0.4483	0.6333	0.625	0.225	0.629	0	0.6071	0.4138	0.6489	0.5957	0.1915	0.6489	0.1809	0.5638	0.6383	0.5532	0.2766	0.4364	0.2394	0.5915	0.493	0.5978	0.6383	0.5952	0.9178	0.6489	0.9	0.9556	0.8193	0	0.5	59
GPN2	Candidate gene	0.6489	0.8977	0.7021	0	0.5778	0.5698	0	0	0	0.8261	0	0	0	0	0	0	0	0	0	0	0.6489	0.2128	0.1489	0.6489	0.8298	0.5638	0.6383	0.5532	0.1915	0	0.1408	0.6338	0.4507	0.5978	0.6383	0.5952	0	0.6489	0.475	0.2556	0.7952	0.6098	0.5	60
WDTC1	Candidate gene	0.6596	0.4432	0.7021	0.7333	0.5778	0.5698	0.7	0	0	0.8261	0	0	0	0	0	0	0.629	0	0.3214	0	0.6489	0.1489	0.4362	0.6489	0.4149	0.5638	0.6383	0.5532	0.234	1	0.1972	0.8592	0.3803	0.5978	0.6383	0.5952	0.0822	0.6489	0.8125	0.7444	0.0241	0.6098	0.5	61
LHX1	Candidate gene	0.6702	0.8977	0.1702	0.84	0.0667	0.0698	0.7	0	0	0.8261	0	0.7241	0	0	0.625	0	0	0	0.3929	0	0.6489	0.8617	0.8085	0.6489	0.2234	0.5638	0.6383	0.5532	0.8723	0.2364	0.7324	0.5634	0.8451	0.5978	0.6383	0.5952	0.9178	0.6489	0.1625	0.0222	0.1084	0.6098	0.5	62
GINS3	Candidate gene	0.6809	0.8977	0.7021	0.8933	0.5778	0.5698	0	0	0.6275	0.3043	0	0	0	0	0	0	0.629	0	0	0	0.6489	0.7128	0.8085	0.6489	0.5106	0.5638	0.6383	0.5532	0.7128	0	0.6901	0.6479	0.5915	0.5978	0.6383	0.5952	0.589	0.2766	0.4	0.9333	0.6145	0.0732	0.5	63
CLPS	Candidate gene	0.6915	0.7841	0.1489	0.52	0.5778	0.5698	0.7	0.6667	0.6275	0.8261	0.4333	0	0	0.6333	0.625	0.675	0.629	0	0.3393	0.7241	0.6489	0.8617	0.8085	0.6489	0.4362	0.5638	0.6383	0.5532	0.8723	0.7636	0.9437	0.2113	0.5634	0.5978	0.6383	0.5952	0.8082	0.6489	0.7625	0.5111	0.5301	0	0.5	64
TMEM222	Candidate gene	0.7021	0.8977	0.7021	0	0.5778	0.5698	0.7	0	0	0.5326	0	0	0	0	0	0	0	0	0	0	0.6489	0.6702	0.5745	0.6489	0.3723	0.5638	0.6383	0.5532	0.6809	0	0.7887	0.3944	0.9296	0.5978	0.1489	0.1071	0	0.6489	0	0.3222	0	0.6098	0.5	65
FAM46B	Candidate gene	0.7128	0	0.7021	0	0.5778	0.5698	0.7	0	0	0.5652	0	0	0	0	0	0	0	0	0	0	0.6489	0.8617	0.8085	0.6489	0.8298	0.5638	0.6383	0.5532	0.8723	0	0	0	0	0.5978	0.6383	0.0476	0.3288	0.6489	0.5	0.1333	0.2651	0	0.5	66
SNX11	Candidate gene	0.7234	0.8977	0.7021	0	0.5778	0.5698	0	0	0	0.8261	0	0	0	0	0	0	0	0	0	0	0.6489	0.2128	0.8085	0.6489	0.1596	0.5638	0.6383	0.5532	0.1915	0	0.2958	0.6197	0.8028	0.1522	0.6383	0.5952	0.6986	0.6489	0.45	0.4111	0.8795	0.6098	0.5	67
CEP85L	Candidate gene	0.734	0.2727	0.2872	0	0	0	0.2	0	0	0.8261	0	0	0	0	0	0	0.629	0	0	0	0.6489	0.4468	0.8085	0.6489	0.3085	0.5638	0.6383	0.5532	0.4362	0	0	0	0	0.5978	0.6383	0.5952	0.4247	0.1383	0.9375	0.8222	0	0	0.5	68
CCL13	Candidate gene	0.7447	0.5455	0.7021	0.4267	0.5778	0.5698	0.7	0	0.1961	0.1848	0	0	0	0	0.625	0.675	0.629	0	0.0179	0	0.6489	0.5532	0.8085	0.6489	0.8298	0.5638	0.6383	0.5532	0.7021	0.9273	0.3803	0.4085	0.831	0.5978	0.6383	0.5952	0.3288	0.6489	1	0.2222	0.988	0.6098	0.5	69
WNT7B	Candidate gene	0.7553	0.2045	0.7021	0.7867	0.5778	0.5698	0.7	0	0.6275	0.3043	0.7333	0.7241	0.5862	0.6333	0.2143	0.675	0.629	0	0.4464	0.9655	0.6489	0.4468	0.5851	0.6489	0.8298	0.5638	0.6383	0.5532	0.5638	0	0.2254	0.9718	0.7465	0.5978	0.6383	0.5952	0.9178	0.6489	0	0.1889	0	0.6098	0.5	70
MED18	Candidate gene	0.766	0.625	0.7021	0	0.5778	0.5698	0.7	0	0	0.3696	0.3	0	0	0	0.625	0	0	0	0.875	0	0.0426	0.7234	0.8085	0.6489	0.6596	0.5638	0.6383	0.0957	0.734	0	0.507	0.6901	0.9014	0.5978	0.6383	0.5952	0	0.6489	0.775	0.3222	0.9398	0.6098	0.5	71
TBC1D21	Candidate gene	0.7766	0.1932	0.7021	0	0.5778	0.5698	0	0	0	0.8261	0	0	0	0	0	0	0	0	0	0	0.6489	0.2128	0.8085	0.6489	0.8298	0.5638	0.6383	0.5532	0.1915	0	0	0	0	0.5978	0.6383	0.5952	0.9178	0.6489	0.6	0.8222	0.6265	0.6098	0.5	72
STOML1	Candidate gene	0.7872	0.625	0.7021	0.96	0.5778	0.5698	0.7	0	0	0.8261	0	0	0	0	0	0	0	0	0	0	0.6489	0.5	0.8085	0.6489	0.8298	0.5638	0.6383	0.5532	0.4149	0.2545	0.5775	0.8732	0.1831	0.5978	0.6383	0.5952	0.3288	0.6489	0.2625	0.8222	0.5904	0.6098	0.5	73
GRHL3	Candidate gene	0.7979	0.8977	0.7021	0.8533	0.5778	0.5698	0.7	0	0.6275	0.8261	0	0	0	0	0	0	0	0	0.4107	0	0.6489	0.8617	0.8085	0.6489	0.8298	0.5638	0.6383	0.5532	0.8723	0	0	0	0	0.5978	0.6383	0.5952	0.5342	0.6489	0.5375	0.5667	0.6867	0.6098	0.5	74
ARMC12	Candidate gene	0.8085	0	0.7021	0	0.5778	0.5698	0	0	0	0.8261	0	0	0	0	0	0	0.629	0	0	0	0.6489	0.8617	0.3298	0.6489	0.8298	0.5638	0.6383	0.5532	0.8723	0	0	0	0	0.5978	0.6383	0.5952	0.3288	0.6489	0.6375	0.8222	0	0	0.5	75
STPG1	Candidate gene	0.8191	0.2727	0.3723	0	0.5778	0.5698	0.7	0	0	0.8261	0	0	0	0	0	0	0	0	0	0	0.6489	0.8617	0.8085	0.6489	0.8298	0.5638	0.6383	0.5532	0.8723	0	0	0	0	0	0.6383	0.5952	0.589	0.2447	0.425	0.8222	0	0	0.5	76
FAM118A	Candidate gene	0.8298	0.8977	0.7021	0.6533	0	0.5698	0	0	0	0.8261	0	0	0	0	0	0	0.1129	0	0	0	0.6489	0.8617	0.8085	0.6489	0.8298	0.5638	0.6383	0.5532	0.8723	0	0.169	0.7042	0.8873	0.5978	0.6383	0.5952	0.411	0.6489	0.4625	0.8222	0.8554	0.1829	0.5	77
ANKFN1	Candidate gene	0.8404	0	0.7021	0	0.5778	0.5698	0.2	0	0	0.8261	0	0	0	0	0	0	0.629	0	0	0	0.6489	0.8617	0.8085	0.6489	0.8298	0.5638	0.6383	0.5532	0.8723	0	0	0	0	0.5978	0.6383	0.5952	0.9178	0.6489	0.3625	0.4111	0.3976	0.6098	0.5	78
TEKT5	Candidate gene	0.8511	0.3409	0.2872	0	0.5778	0.5698	0.2	0	0	0.8261	0	0	0	0	0	0	0.629	0	0	0	0.2553	0.8617	0.8085	0.6489	0.8298	0.5638	0.6383	0.5532	0.8723	0	0	0	0	0.5978	0.6383	0.5952	0.9178	0.266	0.2875	0.5667	0.8313	0	0.5	79
SRRM3	Candidate gene	0.8617	0	0.7021	0	0.5778	0.5698	0.7	0	0	0.3478	0	0	0	0	0	0	0	0	0	0	0.6489	0.8617	0.8085	0.6489	0.8298	0.5638	0.6383	0.5532	0.8723	0	0	0	0	0.1196	0.6383	0	0	0.6489	0	0	0	0.6098	0.5	80
IFI6	Candidate gene	0.8723	0.4432	0.7021	0.4	0.5778	0.5698	0.7	0	0	0.4022	0.7333	0.7241	0	0	0.625	0	0.629	0	0	0	0.6489	0.1383	0.8085	0.6489	0.8298	0.5638	0.6383	0.5532	0.4255	0.4	0.8028	0.9859	0.9718	0.5978	0.6383	0.5952	0.6986	0.6489	0.3875	0.9778	0.6988	0.6098	0.5	81
NIPAL3	Candidate gene	0.883	0.8977	0.7021	0.9467	0.5778	0.5698	0.7	0	0	0.8261	0	0	0	0	0	0	0	0	0.875	0	0.6489	0.2128	0.8085	0.6489	0.8298	0.5638	0.6383	0.5532	0.1915	0.5818	0.4366	0.4225	0.9155	0.5978	0.1489	0.5952	0.6438	0.6489	0.15	0.6778	0	0.6098	0.5	82
CD164L2	Candidate gene	0.8936	0.8977	0.7021	0	0.5778	0.5698	0.7	0	0	0	0	0	0	0	0	0	0	0	0	0	0.6489	0.8617	0.8085	0.6489	0.8298	0.5638	0.6383	0.5532	0.8723	0	0	0	0	0.5978	0.6383	0.5952	0	0.6489	0.8	0.5111	0.6627	0	0.5	83
LHFPL5	Candidate gene	0.9043	0.8977	0.1064	0	0.5778	0.5698	0.7	0	0.6275	0.8261	0	0	0	0	0	0	0	0.6522	0.875	0.5517	0.6489	0.8617	0.8085	0.6489	0.8298	0.5638	0.6383	0.5532	0.8723	0	0	0	0	0.5978	0.6383	0.5952	0.9178	0.2979	0	0.3	0.759	0	0.5	84
GPR3	Candidate gene	0.9149	0.8977	0.7021	0.9867	0.5778	0.5698	0.7	0	0	0.5978	0	0.7241	0	0	0.625	0	0.629	0	0.7679	0	0.6489	0.5532	0.8085	0.6489	0.8298	0.5638	0.6383	0.5532	0.5106	0.8	0.5915	0.8873	0.5211	0.5978	0.6383	0.5952	0	0.6489	0.725	0.8778	0.2289	0.6098	0.5	85
UPK3A	Candidate gene	0.9255	0.2727	0.1064	0.7733	0.5778	0	0.7	0	0.6275	0.5	0	0	0	0	0	0	0.1129	0.6522	0.8214	0.9655	0.6489	0.8617	0.8085	0.6489	0.8298	0.5638	0.6383	0.5532	0.8723	0.3273	0.7183	0.3803	0.6338	0.1087	0.6383	0.5952	0.9178	0.2872	0.75	0.2778	0.9157	0.6098	0.5	86
TMEM132E	Candidate gene	0.9362	0.8977	0.7021	0	0.5778	0	0.7	0	0	0.8261	0	0	0	0	0	0	0.629	0	0	0	0.6489	0.8617	0.8085	0.6489	0.8298	0.5638	0.6383	0.5532	0.8723	0	0	0	0	0.5978	0.6383	0.5952	0.8082	0.6489	0.9625	0.0667	0.5422	0.6098	0.5	87
PLEKHM2	Candidate gene	0.9468	0.1477	0.3723	1	0.5778	0.5698	0.2	0	0	0.8261	0	0	0	0	0.625	0	0	0	0.8214	0	0.6489	0.8617	0.234	0.6489	0.8298	0.5638	0.6383	0.5532	0.8723	0.2182	0.7746	0.7324	0.2676	0.5978	0.1489	0.5952	0	0.6489	0.975	0.7	0.6386	0.6098	0.5	88
THEMIS2	Candidate gene	0.9574	0.8977	0.7021	0.3733	0.5778	0.5698	0	0	0	0.8261	0	0	0	0	0	0	0.629	0	0.9464	0	0.6489	0.8617	0.8085	0.6489	0.8298	0.5638	0.6383	0.5532	0.8723	0.8182	0.6761	0.7183	0.1972	0	0.6383	0.5952	0.589	0.6489	0.5625	0.9333	0	0	0.5	89
GPATCH3	Candidate gene	0.9681	0.8977	0.7021	0	0.5778	0.5698	0	0	0	0.8261	0	0	0	0	0	0	0	0	0	0	0.6489	0.8617	0.8085	0.6489	0.8298	0.5638	0.6383	0.5532	0.8723	0	0.3099	0.7465	0.5493	0.5978	0.6383	0	0.6986	0.6489	0	0.4111	0.9639	0.6098	0.5	90
FCN3	Candidate gene	0.9787	0.625	0.7021	0.8	0.5778	0.5698	0.7	0	0.6275	0	0	0	0	0	0	0	0.629	0.6522	0	0.7241	0.6489	0.8617	0.8085	0.6489	0.8298	0.5638	0.6383	0.5532	0.8723	0.9818	1	0.1549	0.6901	0.5978	0.6383	0.5952	0.9178	0.6489	0.7125	0.6111	0.8675	0.6098	0.5	91
CCL1	Candidate gene	0.9894	0.625	0.7021	0.32	0.5778	0.5698	0.7	0	0.6275	0.8261	0	0	0	0	0.625	0.675	0.629	0	0.9464	0.9655	0.6489	0.8617	0.8085	0.6489	0.8298	0.5638	0.6383	0.5532	0.8723	0.5636	0.0845	0.0563	0.9577	0.5978	0.6383	0.5952	0.9178	0.6489	0.9125	0.9222	1	0.6098	0.5	92
SRRM3	Candidate gene	1	0	0.7021	0	0.5778	0.5698	0.7	0	0	0.3478	0	0	0	0	0	0	0	0	0	0	0.6489	0.8617	0.8085	0.6489	0.8298	0.5638	0.6383	0.5532	0.8723	0	0	0	0	0.1196	0.6383	0	0.9178	0.6489	0.9875	1	0	0.6098	0.5	93

## Sheet: Racing_Skeletal_Muscle
Gene name	Group	P-value	Annotation â€“ Gene Ontology	Annotation â€“ UniProt	Text-mining	Annotation â€“ InterPro	Annotation â€“ Pfam	Annotation â€“ SIMAP (localization)	Annotation â€“ DrugBank	Annotation â€“ Stitch	Annotation â€“ RGD ChEBI	Annotation â€“ Reactome	Annotation â€“ WikiPathways	Annotation â€“ RGD pathways	Annotation â€“ BioCarta	Annotation â€“ CPDB	Annotation â€“ hiPathDB	Annotation â€“ GAD	Annotation â€“ OMIM	Annotation â€“ RGD MP	Annotation â€“ RGD RDO	Interaction â€“ String	Interaction â€“ BioGrid	Interaction â€“ I2D	Interaction â€“ IntAct	Interaction â€“ iRefIndex	Interaction â€“ Mint	Interaction â€“ HPRD	Interaction â€“ MIPS	Interaction â€“ GeneRIF	Expression â€“ Su et al (2002)	Expression â€“ Su et al (2004)	Expression â€“ CMAP	Expression â€“ Lukk et al	Annotation â€“ PaGenBase	Annotation â€“ CGAP	Annotation â€“ GNF	Annotation â€“ eGenetics	Blast	Precalculated â€“ Ouzounis	Precalculated â€“ Prospectr	Precalculated â€“ HaploPred	Annotation â€“ Aura	Annotation â€“ mirZ	id
ACTA1	Training gene	0.0058	0.0062	0.0058	0.0382	0.0189	0.0247	0	0.0476	0	0.0595	0	0.02	0	0.02	0.1	0.194	0.1393	0.0286	0.038	0.0217	0.0349	0.0291	0.0291	0.0233	0.0291	0.0174	0.0233	0.5523	0.0349	0.0213	0.0083	0.1488	0.0083	0.006	0.2118	0.0133	0	0.0291	0.0946	0.5706	0.0728	0.5948	0.5029	0
RYR1	Training gene	0.0116	0.0186	0.2035	0.0763	0.0314	0.0185	0.1969	0.0952	0.0116	0.2798	0.25	0.1	0.0714	0	0.01	0.1343	0.0082	0.0571	0.0759	0.0652	0.064	0.0291	0.0291	0.0233	0.0291	0.0174	0.0233	0.5523	0.0349	0.0745	0.0165	0.1074	0.0248	0.0476	0.2412	0.02	0.1773	0.0291	0	0.0184	0.543	0.5948	0.5029	1
GYS1	Training gene	0.0174	0.8199	0.0407	0.0458	0.0503	0.0494	0	0	0.1047	0.1071	0.0147	0.18	0.0357	0.04	0.04	0.0149	0.0164	0.1714	0.1139	0.3696	0.1395	0.0291	0.0291	0.0233	0.0291	0.0174	0.0233	0.5523	0.0349	0.0319	0.0331	0.157	0.0413	0.0238	0.1059	0.06	0.0709	0.0291	0.1081	0.1963	0.2914	0.1895	0.5029	2
ACTB	Training gene	0.0233	0.0124	0.0233	0.084	0.0189	0.0247	0	0	0	0.0833	0.2353	0.04	0.0893	0.12	0.07	0.0896	0.5984	0.1143	0.0253	0.2391	0.0058	0.0291	0.0291	0.0233	0.0291	0.0174	0.0233	0.0058	0.0349	0.0638	0.5124	0.3058	0.1074	0.25	0.0882	0.06	0.4184	0.0291	0.0878	0.4663	0.0132	0.1503	0.5029	3
SLC2A4	Training gene	0.0291	0.0745	0.0581	0.0916	0.0629	0.0802	0.1969	0	0.0233	0.125	0.0294	0.14	0.0179	0.06	0.05	0.0299	0.1803	0.2	0.0506	0.2826	0.1395	0.0291	0.0291	0.0233	0.0291	0.0174	0.0233	0.5523	0.0349	0.0426	0.438	0.0331	0.0661	0.0238	0.1529	0.5733	0.0851	0.0291	0.1824	0.4663	0.3377	0.5948	0.5029	4
MYH1	Training gene	0.0349	0.0373	0.0465	0.0305	0.0755	0.0556	0.1969	0	0	0.0238	0	0	0.0536	0	0.12	0.0448	0.1557	0	0.1646	0	0.0058	0.0291	0.0291	0.0233	0.0291	0.564	0.0233	0.5523	0.0349	0	0.0248	0.0083	0.0165	0.0179	0.2412	0.1	0.1418	0.0291	0.4527	0.6074	0.1258	0.5948	0.5029	5
MSTN	Training gene	0.0407	0.0683	0.6977	0.0992	0.0566	0.0679	0.7008	0	0.093	0.0357	0	0.22	0	0	0.17	0	0.1475	0.1429	0.1266	0.3478	0.1395	0.0291	0.0291	0.6221	0.0291	0.564	0.0233	0.5523	0.0349	0.0851	0.3058	0.0248	0.0579	0.0119	0.6235	0.5733	0.0071	0.0291	0.2095	0.5521	0.0927	0.5948	0.5029	6
MICAL1	Training gene	0.0465	0.0248	0.0116	0.0076	0.0063	0.0062	0.1969	0	0	0.1964	0	0	0	0	0	0	0	0	0	0	0.2384	0.0291	0.0291	0.6221	0.0291	0.0174	0.0233	0.0058	0.0349	0	0.6612	0.4298	0.1405	0.631	0.6235	0.5733	0.3191	0.0291	0.9257	0.4663	0.9536	0.0654	0.5029	7
MICAL2	Training gene	0.0523	0.0248	0.0116	0.0153	0.0126	0.0123	0	0	0	0.1548	0	0	0	0	0	0	0.5984	0	0	0	0.2384	0.0291	0.0291	0.6221	0.0291	0.564	0.5988	0.5523	0.0349	0.117	0.5372	0.3554	0.1901	0.631	0.0235	0.5733	0.3404	0.0291	0.5473	0.1227	0.2848	0.0654	0.5029	8
SEPN1	Training gene	0.0581	0.5155	0.1163	0.0534	0.1258	0.5432	0.7008	0	0.1163	0.3988	0	0	0	0	0.6	0	0	0.0857	0.1519	0.0435	0.0349	0.0291	0.0291	0.0233	0.0291	0.564	0.5988	0.5523	0.0349	0	0	0	0	0.631	0.1529	0	0.1277	0.0291	0.1959	0.3742	0.7616	0.0654	0.5029	9
HSPD1	Candidate gene	0.064	0.5155	0.1802	0.3435	0.566	0.5432	0.1969	0	0.6628	0.2619	0.1765	0.7	0.3571	0.58	0.6	0	0.5984	0.6	0.481	0.1087	0.1047	0.4419	0.1337	0.1105	0.4535	0.0988	0.1802	0.093	0.4593	0	0	0	0	0.131	0.6235	0	0.4965	0.6163	0.1014	0.1656	0.0265	0.1373	0.5029	10
PRKCA	Candidate gene	0.0698	0.764	0.3198	0.1221	0.566	0.5432	0	0.6667	0.1512	0.0714	0.6324	0.06	0.6964	0.58	0.03	0.1045	0.0738	0.6	0.1013	0.2609	0.0174	0.5814	0.4826	0.1105	0.4767	0.1221	0.1453	0.0349	0.5581	0.5957	0.5868	0.7769	0.9256	0.631	0.6235	0.5733	0.7092	0.6163	0.1149	0.0061	0.0795	0.5948	0.5029	11
ABLIM3	Candidate gene	0.0756	0.1242	0.1977	0.8473	0.0377	0.037	0	0	0.6628	0.2857	0.3088	0	0	0	0.6	0.6119	0.5984	0	0	0	0.6221	0.0756	0.093	0.0698	0.1221	0.564	0.0581	0.5523	0.0349	0.0957	0.6033	0.8678	0.1322	0.1964	0.0235	0.5733	0.5319	0.0814	0.7703	0.1227	0.2384	0.5948	0.5029	12
CASP8	Candidate gene	0.0814	0.7764	0.1802	0.2366	0.566	0.5432	0.1969	0	0.6628	0.0774	0.3824	0.7	0.1071	0.1	0.13	0.2239	0.0738	0.6	0.0886	0.5435	0.1105	0.6802	0.4884	0.2384	0.5407	0.564	0.186	0.0233	0.593	0.1915	0.3223	0.3388	0.1157	0.631	0.6235	0.5733	0.5957	0.6163	0.1554	0.4663	0.4305	0.5948	0.5029	13
BAG3	Candidate gene	0.0872	0.5155	0.1221	0.3053	0.566	0.5432	0.1969	0	0.6628	0.1548	0	0.7	0	0	0.6	0	0.5984	0.6	0.0127	0.087	0.0349	0.5988	0.3895	0.6221	0.3837	0.564	0.5988	0.0174	0.6163	0	0.0496	0.5702	0.124	0.631	0.0647	0.06	0	0.6163	0.4932	0.7914	0.1391	0.5948	0.5029	14
PKM	Candidate gene	0.093	0.0497	0.3198	0.313	0.566	0.5432	0.7008	0.6667	0.6628	0.1429	0.0588	0.34	0.6429	0.58	0.19	0.1791	0.5984	0	0.6962	0	0.0872	0.2558	0.1163	0.1047	0.2209	0.064	0.157	0.5523	0.2267	0.4787	0.3388	0.5207	0.7603	0	0.2118	0.06	0.1135	0.6163	0.3311	0.1656	0	0	0.5029	15
RDX	Candidate gene	0.0988	0.1118	0.0349	0.5954	0.566	0.5432	0.1969	0.6667	0.6628	0.3988	0.3088	0.26	0	0	0.6	0.1194	0.5984	0.6	0.443	0.5435	0.1279	0.5698	0.1453	0.1395	0.25	0.564	0.0756	0.5523	0.314	0.883	0.6529	0.2066	0.5455	0.0893	0.6235	0.5733	0.2908	0.0988	0.3784	0.3313	0.1987	0.0654	0.5029	16
PCK2	Candidate gene	0.1047	0.5155	0.6977	0.1908	0.566	0.5432	0.7008	0	0.0465	0.006	0.0588	0.3	0.6786	0.58	0.11	0.0746	0.5984	0.6	0	0.5435	0.2093	0.064	0.0698	0.0523	0.064	0.564	0.5988	0.5523	0.0698	0.8298	0.9504	0.6612	0.6364	0.631	0.6235	0.5733	0.1135	0.6163	0.2432	0.1963	0.5364	0.5948	0.5029	17
SIN3A	Candidate gene	0.1105	0.6957	0.6977	0.4046	0.566	0.5432	0.1969	0	0.0814	0.3333	0.5147	0.7	0.7143	0.58	0.6	0.6119	0.5984	0	0.6962	0	0.6221	0.5349	0.2733	0.2442	0.4302	0.564	0.1919	0.0291	0.5465	0	0	0	0	0.631	0.0235	0.5733	0.0284	0.6163	0.2297	0.5092	0.053	0.0654	0.5029	18
PTEN	Candidate gene	0.1163	0.3975	0.1802	0.2901	0.566	0.5432	0	0	0.1279	0.0595	0.6324	0.2	0.8214	0.16	0.15	0.0448	0.5984	0.6	0.0633	0.3913	0.093	0.5	0.4942	0.6221	0.3547	0.564	0.1163	0.5523	0.5	0	0	0	0	0.631	0.6235	0	0	0.6163	0.0203	0.7239	0	0.0654	0.5029	19
COX7A1	Training gene	0.1221	0.7888	0.6977	0.0229	0.0692	0.0617	0.7008	0.1429	0.6628	0.1726	0	0.38	0.4821	0	0.6	0	0.5984	0	0.1772	0	0.6221	0.8605	0.8256	0.6221	0.814	0.564	0.5988	0.5523	0.8488	0.0106	0.0413	0.0165	0.0331	0.0417	0.0941	0.0067	0.1489	0.0698	0.9865	0.9877	0.8344	0.5948	0.5029	20
CSPG4	Candidate gene	0.1279	0.5155	0.6977	0.5038	0.1132	0.5432	0.7008	0	0	0.5	0.0441	0	0	0.58	0.6	0	0.5984	0	0.2532	0.3043	0.6221	0.4535	0.5	0.6221	0.2384	0.0465	0.1047	0.5523	0.3779	0.5426	0.3802	0.1405	0.6116	0.0893	0.6235	0.5733	0.5957	0.6163	0.2703	0.0307	0.7682	0.5948	0.5029	21
IREB2	Candidate gene	0.1337	0.6273	0.3198	0.5496	0.566	0.5432	0	0	0.0581	0.5	0	0.7	0	0.58	0.6	0	0.5984	0	0.4177	0.5435	0.6221	0.3547	0.2442	0.6221	0.1802	0.564	0.5988	0.5523	0.2733	0.4894	0.4876	0.5455	0.3802	0.631	0.6235	0.5733	0.6454	0.6163	0.527	0.7239	0.5762	0.1373	0.5029	22
CCNB1	Candidate gene	0.1395	0.0621	0.2267	0.5649	0.566	0.5432	0.7008	0	0.6628	0.0952	0.8235	0.16	0.7679	0.58	0.06	0.6119	0.5984	0	0	0.413	0.1163	0.5407	0.5058	0.2151	0.5465	0.0698	0.5988	0.0872	0.5988	0.3085	0.8347	0.3306	0.2397	0.631	0.6235	0.5733	0.0922	0.1279	0.3851	0.4663	0.0066	0.1699	0.5029	23
PRKG1	Candidate gene	0.1453	0.0807	0.3198	0.1069	0.566	0.5432	0.1969	0	0.1395	0.3036	0.8235	0.7	0.8571	0	0.6	0.1642	0.5984	0	0.2152	0	0.0233	0.6628	0.3605	0.6221	0.314	0.564	0.0872	0.5523	0.4651	0.8404	0.3306	0.0579	0.0826	0.631	0.6235	0.5733	0	0.1686	0.2635	0.3067	0.0199	0.5948	0.5029	24
MINPP1	Candidate gene	0.1512	0.2671	0.0872	0.4427	0.566	0.5432	0.7008	0	0.2093	0.1964	0.5147	0	0.5179	0	0.6	0.6119	0.5984	0.6	0.8861	0.7391	0.0465	0.1686	0.0756	0.6221	0.064	0.564	0.0523	0.0581	0.0756	0.5745	0.9752	0.1983	0.6942	0.631	0.2118	0.5733	0	0.6163	0.5878	0.2454	0.0596	0.5948	0.5029	25
EIF3A	Candidate gene	0.157	0.5155	0.3198	0.6412	0.566	0.5432	0.1969	0	0.6628	0.3333	0.1765	0.7	0	0.58	0.6	0.6119	0.5984	0	0	0	0.6221	0.5291	0.2035	0.1337	0.4012	0.0814	0.5988	0.5523	0.5814	0.3723	0.8512	0.2562	0.3884	0.631	0.0647	0.12	0	0.1919	0.5405	0.6748	0.0464	0.5948	0.5029	26
PML	Candidate gene	0.1628	0.6273	0.3198	0.1756	0.566	0.5432	0.1969	0	0.6628	0.5	0.8235	0.7	0.5536	0.58	0.09	0.6119	0.5984	0.6	0.6962	0	0.2151	0.4826	0.4302	0.1628	0.3953	0.1105	0.1512	0.5523	0.5058	0.3298	0.0579	0.4711	0.3554	0.631	0.6235	0.5733	0.7092	0.6163	0.0068	0.7914	0.7947	0.183	0.5029	27
WDR61	Candidate gene	0.1686	0.5155	0.3198	0	0.566	0.5432	0	0	0	0.5	0	0	0	0	0.6	0	0.5984	0	0	0	0.6221	0.593	0.3721	0.6221	0.5756	0.0814	0.5988	0.5523	0.5756	0.2234	0.9091	0.1901	0.4463	0.631	0.6235	0.5733	0.1844	0.6163	0.4257	0.5092	0.2781	0.5948	0.5029	28
TIAL1	Candidate gene	0.1744	0.2671	0.3198	0.626	0.566	0.5432	0	0	0.6628	0.8155	0	0	0	0.58	0	0.6119	0	0	0.481	0	0.6221	0.2791	0.0872	0.0465	0.0756	0.0465	0.5988	0.5523	0.1977	0.3511	0.7107	0.6281	0.2149	0.631	0.6235	0.5733	0	0.6163	0.2905	0.6442	0.351	0.5948	0.5029	29
COX5A	Candidate gene	0.1802	0.7888	0.6977	0.4962	0.566	0.5432	0.7008	0.1429	0.2093	0.619	0.5147	0.38	0.4821	0.58	0.6	0.6119	0.5984	0	0	0	0.0814	0.4709	0.2558	0.6221	0.3779	0.564	0.5988	0.5523	0.5233	0.0532	0.3884	0.7025	0.2066	0.0595	0.1529	0.06	0.2128	0.6163	0.7568	0.6442	0.8079	0.5948	0.5029	30
PKP4	Candidate gene	0.186	0.5155	0.2267	0.6718	0.566	0.5432	0.1969	0	0	0.1964	0	0	0	0	0.19	0	0.5984	0	0.8861	0	0.6221	0.6105	0.4128	0.1512	0.5523	0.564	0.5988	0.5523	0.6221	0.5213	0.6777	0.2314	0.4545	0.631	0.6235	0.5733	0	0.6163	0.2973	0.5276	0.1192	0.5948	0.5029	31
CSK	Candidate gene	0.1919	0.5155	0.3198	0.1679	0.566	0.5432	0	0.6667	0.2093	0.0179	0.8235	0.26	0.8393	0.08	0.14	0.1493	0.5984	0	0.3797	0.9348	0.6221	0.343	0.407	0.1919	0.3721	0.564	0.1337	0.5523	0.3081	0.5851	0.9008	0.314	0.0909	0.631	0.6235	0.5733	0.6454	0.6163	0.1351	0.1656	0.1126	0.0654	0.5029	32
PACSIN2	Candidate gene	0.1977	0.0559	0.2267	0.374	0.566	0.5432	0.1969	0	0.6628	0.5	0	0	0	0	0	0	0.5984	0	0	0	0.6221	0.6744	0.6047	0.6221	0.4826	0.564	0.5988	0.5523	0.6628	0.2447	0.8182	0.4463	0.686	0.631	0.6235	0	0.3759	0.6163	0.3243	0.4663	0.4371	0.5948	0.5029	33
CNTN1	Candidate gene	0.2035	0.6957	0.6977	0.3817	0.566	0.5432	0.7008	0	0.6628	0.0357	0.3088	0	0.7679	0.58	0.6	0.6119	0.5984	0.6	0.519	0.1739	0.1512	0.6628	0.5291	0.6221	0.436	0.564	0.5988	0.5523	0.686	0.2128	0.2727	0.8595	0.7851	0.631	0.6235	0.5733	0.4539	0.1628	0.1622	0.0552	0.3907	0.5948	0.5029	34
MCMBP	Candidate gene	0.2093	0.2671	0.6977	0.6794	0.566	0.5432	0	0	0	0.1964	0	0	0	0	0	0	0.5984	0	0	0	0.6221	0.0872	0.1279	0.6221	0.564	0.564	0.5988	0.5523	0.1105	0	0.3967	0.7107	0.3967	0.631	0.6235	0.5733	0.0355	0.1512	0	0.3742	0	0	0.5029	35
CLIP1	Candidate gene	0.2151	0.0932	0.2267	0.4809	0.566	0.5432	0.1969	0	0.6628	0.5	0.8235	0	0.5893	0.58	0.6	0.6119	0.5984	0	0.8861	0	0.6221	0.5756	0.3256	0.6221	0.1221	0.564	0.1279	0.0465	0.436	0.8617	0.1901	0.3636	0.0992	0.631	0.6235	0.12	0.3121	0.0756	0.1757	0.7914	0.2185	0.5948	0.5029	36
CYP11A1	Candidate gene	0.2209	0.8323	0.0523	0.1298	0.566	0.5432	0.7008	0.6667	0.0698	0.0952	0.5147	0.7	0.2321	0.58	0.6	0.6119	0.0738	0.6	0.2025	0.1522	0.1977	0.2384	0.3256	0.6221	0.2035	0.0465	0.064	0.5523	0.2733	0.9787	0.9917	0.0826	0.9835	0.631	0.6235	0.5733	0.5106	0.6163	0.027	0.4663	0.404	0.5948	0.5029	37
ULK3	Candidate gene	0.2267	0.5155	0.3198	0.4885	0.566	0.5432	0.1969	0	0	0.8155	0	0.7	0.5893	0	0.6	0.6119	0.5984	0	0	0	0.6221	0.1686	0.1744	0.6221	0.1221	0.564	0.5988	0.5523	0.1453	0	0	0	0	0.631	0.0647	0.5733	0	0.6163	0.6892	0.319	0.4967	0.5948	0.5029	38
POLR2E	Candidate gene	0.2326	0.6957	0.6977	0.6183	0.566	0.5432	0	0	0.6628	0.8155	0.8235	0.7	0.4821	0.58	0.6	0.6119	0.5984	0	0	0	0.1919	0.6105	0.3547	0.1512	0.5814	0.564	0.1628	0.0814	0.6279	0.3936	0.7851	0.2727	0.3388	0.631	0.1529	0.06	0.0496	0.6163	0.6959	0.3436	0.2119	0.0654	0.5029	39
RGS10	Candidate gene	0.2384	0.2671	0.6977	0.4198	0.566	0.5432	0.7008	0	0.6628	0.3333	0	0.1	0	0	0.08	0	0.5984	0	0.4304	0	0.6221	0.4709	0.2442	0.6221	0.1802	0.564	0.0756	0.5523	0.2326	0.5	0.7521	0.7851	0.3306	0.631	0.6235	0.5733	0	0.6163	0.5	0.6196	0.7483	0.5948	0.5029	40
PDHX	Candidate gene	0.2442	0.2671	0.6977	0.687	0.566	0.5432	0.7008	0	0.3023	0.8155	0.5147	0.24	0.6429	0.58	0.6	0.6119	0.5984	0.6	0	0	0.6221	0.5465	0.1105	0.6221	0.1512	0.564	0.1395	0.5523	0.3779	0.7979	0.2975	0.1736	0.157	0.631	0.0235	0.5733	0.4894	0.6163	0.0338	0.3742	0.9934	0.5948	0.5029	41
ACER3	Candidate gene	0.25	0.2671	0.6977	0.0611	0.566	0.5432	0.7008	0	0.6628	0.5	0.5147	0	0.2321	0.58	0.6	0.6119	0.5984	0	0	0	0.1686	0.3081	0.3779	0.6221	0.2849	0.564	0.5988	0.5523	0.2733	0	0	0	0	0.631	0.6235	0.5733	0.8298	0.6163	0.6216	0.7239	0	0.5948	0.5029	42
BBS4	Candidate gene	0.2558	0.0932	0.1337	0.4504	0.566	0.5432	0.1969	0	0	0.5714	0	0	0	0	0	0	0.5984	0.6	0.2911	0.5435	0.0698	0.3605	0.2791	0.2035	0.3198	0.564	0.5988	0.5523	0.2442	0.8191	0.5785	0.5124	0.8926	0.1964	0.1529	0.5733	0.7092	0.1163	0.1892	0.7239	0.8146	0.5948	0.5029	43
ATAD1	Candidate gene	0.2616	0.2671	0.6977	0.1145	0.566	0.5432	0	0	0	0.631	0	0	0	0	0	0	0.5984	0	0.519	0	0.6221	0.3081	0.2093	0.6221	0.3547	0.564	0.5988	0.5523	0.2733	0	0	0	0	0.631	0.1529	0.5733	0	0.6163	0.7838	0.1656	0.3046	0.5948	0.5029	44
ETFA	Candidate gene	0.2674	0.8137	0.0291	0.7176	0.566	0.5432	0.7008	0	0.6628	0.8155	0.5147	0	0.2321	0.58	0.6	0.6119	0.5984	0.6	0	0.7391	0.6221	0.4884	0.1395	0.2151	0.5058	0.564	0.5988	0.5523	0.3779	0.2872	0.8843	0.2975	0.6198	0.1964	0.6235	0.5733	0.2553	0.6163	0.0405	0.5092	0.6424	0.5948	0.5029	45
SCAMP2	Candidate gene	0.2733	0.5155	0.6977	0.8321	0.566	0.5432	0.1969	0	0	0.8155	0	0.7	0	0.14	0.6	0.209	0.5984	0	0	0	0.6221	0.4535	0.3256	0.6221	0.157	0.0465	0.5988	0.5523	0.5233	0	0.0826	0.4793	0.2893	0.631	0.6235	0.5733	0.1986	0.2151	0.8716	0.1227	0.5033	0.0654	0.5029	46
SPOCK1	Candidate gene	0.2791	0.2671	0.6977	0.2672	0.0818	0.5432	0.7008	0	0.6628	0.3333	0	0.3	0	0	0.6	0	0.0738	0	0.8861	0	0.6221	0.1686	0.0756	0.6221	0.5872	0.564	0.5988	0.5523	0.5233	0.7128	0.7686	0.686	0.1653	0.631	0.6235	0.5733	0.3404	0.6163	0.7162	0.1902	0.3974	0.5948	0.5029	47
DKK1	Candidate gene	0.2849	0.6957	0.6977	0.3893	0.566	0.5432	0.7008	0	0.6628	0.0119	0	0	0.7679	0.58	0.6	0.6119	0.0738	0	0.6329	0.9783	0.186	0.5174	0.3895	0.6221	0.2267	0.0698	0.1221	0.5523	0.3198	0.4149	0.7934	0.7355	0.6612	0.1964	0.6235	0.5733	0	0.6163	0.3649	0.0552	0.4901	0.5948	0.5029	48
ABCC9	Candidate gene	0.2907	0.0435	0.0872	0.1832	0.566	0.5432	0.1969	0.6667	0.314	0.3333	0.0882	0	0	0	0.6	0	0.0738	0.6	0.1392	0.1957	0.6221	0.8605	0.5581	0.6221	0.814	0.564	0.5988	0.5523	0.8488	0.9149	0.124	0.0496	0.0496	0.0595	0.6235	0.5733	0.4539	0.6163	0.8919	0.6871	0.8742	0.5948	0.5029	49
GRK5	Candidate gene	0.2965	0.5155	0.3198	0.2824	0.566	0.5432	0	0	0.6628	0.0595	0.8235	0.1	0.8929	0.58	0.01	0.6119	0.5984	0	0.2278	0.1304	0.6221	0.6221	0.6279	0.6221	0.5291	0.564	0.5988	0.5523	0.5872	0.7872	0.5455	0.8512	0.8347	0.2381	0.6235	0.5733	0	0.6163	0	0.4969	0.3444	0.5948	0.5029	50
SEC23IP	Candidate gene	0.3023	0.2671	0.6977	0.5573	0.566	0.5432	0.1969	0	0.6628	0.2321	0	0	0	0	0	0	0.5984	0	0.8861	0	0.6221	0.6395	0.5174	0.6221	0.4128	0.564	0.5988	0.5523	0.5698	0.1809	0.2645	0.1653	0.3719	0.631	0.6235	0.5733	0	0.6163	0.6149	0.8344	0.1589	0.5948	0.5029	51
ACER3	Candidate gene	0.3081	0.2671	0.6977	0.0611	0.566	0.5432	0	0	0	0.5	0	0	0.2321	0.58	0.6	0.6119	0.5984	0	0	0	0.6221	0.3081	0.8256	0.6221	0.2849	0.564	0.5988	0.5523	0.2733	0	0	0	0	0.631	0.6235	0	0	0.6163	0	0	0	0.5948	0.5029	52
PRDX3	Candidate gene	0.314	0.764	0.6977	0.3664	0.566	0.5432	0.7008	0	0.6628	0.2381	0	0.7	0	0.58	0.6	0	0	0	0.6076	0	0.6221	0.2674	0.064	0.0872	0.2558	0.564	0.5988	0.5523	0.2093	0.6915	0.719	0.6033	0.5702	0.631	0.6235	0.5733	0.6454	0.2326	0.9797	0.0859	0.2583	0.5948	0.5029	53
PEAK1	Candidate gene	0.3198	0.7578	0.2267	0.2748	0.566	0.5432	0	0	0.2093	0	0	0	0	0	0	0	0	0	0	0	0.6221	0.0756	0.1744	0.093	0.0814	0.564	0.5988	0.5523	0.0756	0	0.2149	0.2645	0.4132	0.631	0.6235	0.5733	0.2908	0.6163	0.973	0.6564	0	0	0.5029	54
EDC3	Candidate gene	0.3256	0.5155	0.3198	0.9008	0.566	0.5432	0	0	0.6628	0.3333	0.8235	0	0	0.58	0.6	0.6119	0	0	0	0	0.2035	0.4477	0.2267	0.6221	0.3256	0.1047	0.5988	0.5523	0.4477	0	0.8017	0.5537	0.3636	0.631	0.6235	0.5733	0.0355	0.6163	0.4324	0.6748	0.1523	0.0654	0.5029	55
PSMA4	Candidate gene	0.3314	0.5155	0.3198	0.6947	0.566	0.5432	0.1969	0.6667	0.6628	0.619	0.5147	0.7	0.9464	0.58	0.6	0.6119	0.5984	0	0	0	0.6221	0.3663	0.1512	0.2326	0.593	0.564	0.1744	0.5523	0.4535	0.1277	0.9587	0.4959	0.314	0.631	0.6235	0.5733	0.0567	0.6163	0.9527	0.2822	0.0331	0.5948	0.5029	56
HECW1	Candidate gene	0.3372	0.2671	0.3198	0.855	0.566	0.5432	0.1969	0	0.6628	0.5	0	0	0	0	0	0	0.5984	0	0	0	0.6221	0.5872	0.4186	0.6221	0.3256	0.564	0.5988	0.5523	0.4767	0.9362	0.1653	0.438	0.4298	0.631	0.6235	0.5733	0	0.0872	0.6757	0.1227	0.3576	0.5948	0.5029	57
PRPSAP1	Candidate gene	0.343	0.6957	0.6977	0	0.566	0.5432	0.7008	0	0.6628	0.131	0	0	0	0	0	0	0	0	0	0	0.6221	0.686	0.4244	0.6221	0.6221	0.564	0.5988	0.5523	0.6686	0.5106	0.157	0.3223	0.6033	0.631	0.6235	0.5733	0.234	0.6163	0.4865	0.1227	0.9735	0.5948	0.5029	58
SEMA7A	Candidate gene	0.3488	0.6957	0.6977	0.7252	0.566	0.5432	0.7008	0	0.6628	0.5893	0.3088	0	0	0.58	0.6	0.6119	0.5984	0.6	0.8861	0.7391	0.6221	0.8605	0.1221	0.0581	0.0872	0.564	0.5988	0.5523	0.8488	0.7447	0.0992	0.6694	0.4711	0.1488	0.6235	0.5733	0.4965	0.6163	0.0473	0.0552	0.3775	0.5948	0.5029	59
PAPSS2	Candidate gene	0.3547	0.2671	0.0872	0.2214	0.566	0.5432	0	0	0.2093	0.2976	0.5147	0.7	0.2321	0	0.6	0.6119	0.0738	0.6	0.5443	0.9348	0.6221	0.5174	0.8256	0.6221	0.1686	0.564	0.5988	0.5523	0.343	0.9894	0.8099	0.5041	0.5041	0.631	0.0235	0.5733	0.5957	0.1221	0	0.4049	0.5166	0.5948	0.5029	60
RRAGD	Candidate gene	0.3605	0.5155	0.3198	0.1985	0.566	0.5432	0	0	0.6628	0.5	0	0.7	0.5893	0	0.6	0.6119	0.5984	0	0	0	0.6221	0.6105	0.5465	0.6221	0.564	0.564	0.5988	0.5523	0.6453	0.8085	0.2314	0.8099	0.1488	0.0595	0.1529	0.02	0.5957	0.6163	0.723	0.9509	0.5563	0.5948	0.5029	61
TMEM98	Candidate gene	0.3663	0.2671	0.6977	0	0	0.5432	0.7008	0	0	0.1964	0	0	0	0	0	0	0.5984	0	0.4557	0	0.6221	0.3895	0.8256	0.6221	0.1686	0.564	0.5988	0.5523	0.3779	0	0	0	0	0.244	0.6235	0.5733	0.234	0.6163	0.3919	0.4294	0.6887	0.5948	0.5029	62
NPTN	Candidate gene	0.3721	0.6957	0.6977	0.7405	0.566	0.5432	0.7008	0	0	0.8155	0	0	0	0	0	0	0.5984	0	0	0	0.6221	0.6395	0.4535	0.6221	0.2849	0.564	0.5988	0.5523	0.6453	0.4468	0.7769	0.2149	0.2231	0.631	0.6235	0.5733	0.5603	0.6163	0.2027	0.5521	0.4702	0.0654	0.5029	63
YTHDC2	Candidate gene	0.3779	0.6957	0.6977	0.9924	0.566	0.5432	0	0	0	0.131	0	0	0	0	0	0	0.5984	0	0	0	0.6221	0.2616	0.2209	0.1221	0.4651	0.564	0.5988	0.5523	0.1919	0.6596	0.4132	0.2479	0.7273	0.631	0.6235	0.5733	0.0922	0.6163	0.7027	0.4172	0.298	0.0654	0.5029	64
MYO9A	Candidate gene	0.3837	0.1304	0.064	0.9847	0.0881	0.0741	0.1969	0	0.6628	0.2857	0.8235	0	0	0	0.6	0.6119	0	0	0	0	0.6221	0.5174	0.4535	0.1512	0.5058	0.564	0.5988	0.5523	0.4767	0	0.6364	0.7273	0.6529	0.631	0.6235	0.5733	0.8298	0.064	0.2838	0.6074	0.0993	0.5948	0.5029	65
RAB11FIP2	Candidate gene	0.3895	0.5155	0.6977	0.7557	0.566	0.5432	0.1969	0	0.6628	0.3988	0.0882	0	0.875	0	0.6	0.6119	0.5984	0	0	0	0.1744	0.6977	0.3663	0.6221	0.814	0.564	0.5988	0.5523	0.6802	0.734	0.405	0.4132	0.5868	0.631	0.6235	0.5733	0.7092	0.6163	0.6824	0.1227	0.3642	0.5948	0.5029	66
CENPH	Candidate gene	0.3953	0.5155	0.6977	0.5191	0.566	0.5432	0.1969	0	0	0.1964	0.8235	0	0	0.58	0.6	0.6119	0	0	0	0	0.6221	0.4186	0.5814	0.6221	0.4419	0.564	0.5988	0.0988	0.436	0	0	0	0	0.631	0.6235	0.5733	0.2624	0.2267	0	0.865	0.6887	0.5948	0.5029	67
DDX11	Candidate gene	0.4012	0.6957	0.0872	0.8702	0.566	0.5432	0.1969	0	0	0.2202	0.1765	0	0	0	0	0	0	0.6	0.3544	0.7391	0.6221	0.6395	0.5174	0.6221	0.4651	0.564	0.064	0.5523	0.4767	0	0.6942	0.5785	0.4876	0.631	0.6235	0.5733	0.7092	0.157	0.8581	0.3742	0.6225	0.5948	0.5029	68
PPCDC	Candidate gene	0.407	0.2671	0.1686	0	0.566	0.5432	0	0.6667	0.2093	0.8155	0.5147	0	0.2321	0.58	0.6	0.6119	0.5984	0	0	0	0.6221	0.8605	0.5581	0.6221	0.814	0.564	0.5988	0.5523	0.8488	0	0.8264	0.595	0.2645	0.631	0.6235	0.5733	0.1135	0.1395	0.3176	0.3006	0.4437	0.5948	0.5029	69
HSPE1	Candidate gene	0.4128	0.5155	0.6977	0.3588	0.566	0.5432	0.7008	0	0.6628	0.3333	0	0	0	0	0.6	0	0.5984	0	0	0	0.6221	0.407	0.1047	0.1802	0.4884	0.564	0.1628	0.5523	0.3256	0	0	0	0	0.131	0.1529	0.5733	0.8582	0.6163	0.8784	0.2822	0.1325	0.5948	0.5029	70
SLIT1	Candidate gene	0.4186	0.5155	0.6977	0.458	0.1132	0.5432	0.7008	0	0.6628	0.1548	0.3088	0	0	0.58	0.6	0.6119	0.5984	0	0.6962	0.5435	0.6221	0.8605	0.4535	0.6221	0.814	0.564	0.5988	0.5523	0.8488	0	0	0	0	0.0893	0.6235	0.5733	0.4539	0.6163	0	0.5828	0.1788	0.5948	0.5029	71
INVS	Candidate gene	0.4244	0.5155	0.1105	0.7634	0.1321	0.5432	0.1969	0	0	0.8155	0	0	0	0	0	0	0.5984	0.6	0.3165	1	0.6221	0.6395	0.2849	0.6221	0.1919	0.564	0.5988	0.5523	0.2093	0.383	0.1736	0.5289	0.6694	0.631	0.6235	0.5733	0.9291	0.6163	0.0135	0.1227	0.2252	0.5948	0.5029	72
KLHL29	Candidate gene	0.4302	0	0.6977	0	0.566	0.5432	0.1969	0	0	0.8155	0	0	0	0	0	0	0.5984	0	0	0	0.6221	0.1686	0.8256	0.0698	0.814	0.564	0.5988	0.5523	0.1453	0	0.4545	0.6529	0.843	0.631	0.6235	0.5733	0.0709	0.6163	0.0676	0.3313	0	0.0654	0.5029	73
RPS28	Candidate gene	0.436	0.2671	0.6977	0	0.566	0.5432	0.7008	0	0.6628	0.5893	0.1765	0.7	0	0.58	0.6	0.6119	0	0	0	0	0.2267	0.5058	0.2616	0.186	0.5233	0.564	0.5988	0.5523	0.564	0	0.1074	0.9504	0.7355	0.631	0.2412	0	0	0.6163	0	0	0	0.5948	0.5029	74
UBE2Q2	Candidate gene	0.4419	0.2671	0.3198	0.8015	0.566	0.5432	0.1969	0	0.6628	0.5	0.8235	0	0.9464	0	0.6	0	0.5984	0	0	0	0.6221	0.3488	0.6279	0.6221	0.4884	0.564	0.5988	0.5523	0.3779	0	0	0	0	0.631	0.6235	0.12	0.5603	0.6163	0.3108	0.2086	0.6556	0.5948	0.5029	75
INPP5F	Candidate gene	0.4477	0.087	0.6977	0.6107	0.566	0.5432	0.1969	0	0.2093	0.5	0	0	0	0	0.6	0	0.5984	0	0.1899	0	0.6221	0.2209	0.8256	0.6221	0.814	0.564	0.5988	0.5523	0.8488	0.2021	0.7438	0.4215	0.4628	0.631	0.6235	0.5733	0.6738	0.6163	0	0.3742	0.702	0.5948	0.5029	76
DNAJA4	Candidate gene	0.4535	0.8012	0.1453	0	0.566	0.5432	0	0	0	0.3988	0	0	0	0	0	0	0.5984	0	0	0	0.6221	0.1047	0.3256	0.6221	0.4128	0.564	0.5988	0.5523	0.1047	0	0.1322	1	0.6281	0.0357	0.6235	0.5733	0.8014	0.6163	0.5608	0.1227	0.6755	0.5948	0.5029	77
ADPGK	Candidate gene	0.4593	0.9193	0.6977	0.2443	0.566	0.5432	0.7008	0	0.2093	0.8155	0	0.36	0.6429	0	0.6	0	0.5984	0	0	0	0.0988	0.3895	0.8256	0.6221	0.3547	0.564	0.5988	0.5523	0.5233	0	0.6198	0.3719	0.0744	0.631	0.6235	0.5733	0.5603	0.1105	0.3581	0.7239	0.3245	0.5948	0.5029	78
SCAPER	Candidate gene	0.4651	0.2671	0.6977	0.9084	0.566	0.5432	0.1969	0	0	0.5	0	0	0	0	0	0	0.5984	0	0	0	0.6221	0.2209	0.2442	0.6221	0.093	0.564	0.5988	0.5523	0.0988	0.3617	0.1157	0.7603	0.2975	0.631	0.6235	0.5733	0.7589	0.6163	0.75	0.7239	0.7152	0.5948	0.5029	79
PTGES	Candidate gene	0.4709	0.2671	0.6977	0.3969	0.566	0.5432	0.7008	0	0.2791	0.2679	0.5147	0.7	0.2321	0.58	0.6	0.6119	0.5984	0	0.7595	0.8696	0.6221	0.3081	0.8256	0.6221	0.814	0.564	0.5988	0.5523	0.4767	0	0	0	0	0.631	0.6235	0.5733	0.2908	0.6163	0.5541	0.4294	0.8212	0.5948	0.5029	80
NEIL1	Candidate gene	0.4767	0.5155	0.2267	0.6336	0.566	0.5432	0.7008	0.6667	0.6628	0.619	0	0	0.9464	0	0.6	0	0.1885	0	0.2405	0	0.6221	0.3081	0.8256	0.6221	0.814	0.564	0.5988	0.5523	0.2733	0	0.5207	0.2397	0.562	0.631	0.6235	0.5733	0.4823	0.6163	0.1419	0.3742	0.7351	0.5948	0.5029	81
ARIH1	Candidate gene	0.4826	0.5155	0.3198	0.9313	0.566	0.5432	0	0	0.6628	0.2738	0.8235	0	0	0	0.6	0	0.5984	0	0	0	0.6221	0.436	0.3895	0.6221	0.3895	0.564	0.1047	0.5523	0.3779	0.1596	0.4215	0.1157	0.9008	0.0893	0.1529	0.5733	0	0.6163	0.7365	0.5092	0.2715	0.5948	0.5029	82
MAN2C1	Candidate gene	0.4884	0.9193	0.6977	0.771	0.566	0.5432	0	0	0.6628	0.5	0	0	0	0	0.6	0.6119	0	0	0	0	0.6221	0.6395	0.2674	0.6221	0.6047	0.564	0.5988	0.5523	0.6453	0.4362	0.3554	0.6777	0.8182	0.256	0.6235	0.5733	0.4752	0.093	0.5811	0.3742	0.3841	0.5948	0.5029	83
RCN2	Candidate gene	0.4942	0.2671	0.6977	1	0.0943	0.5432	0.7008	0	0.6628	0.5	0	0.7	0	0	0.6	0	0.5984	0	0	0	0.6221	0.4651	0.2151	0.1686	0.4128	0.564	0.5988	0.5523	0.4186	0.4255	0.9421	0.1818	0.7025	0.631	0.0235	0.5733	0.3191	0.6163	0.8446	0.0552	0.2053	0.0654	0.5029	84
ZWINT	Candidate gene	0.5	0.3975	0.6977	0.7099	0	0.5432	0.1969	0	0	0.256	0.8235	0	0	0.58	0.6	0.6119	0.5984	0	0	0	0.6221	0.7093	0.5407	0.1977	0.6163	0.564	0.5988	0.0698	0.6919	0.266	0.876	0.7438	0.2479	0.631	0.2118	0.5733	0.0213	0.6163	0.6284	0.9325	0.1656	0.0654	0.5029	85
STK17A	Candidate gene	0.5058	0.9193	0.6977	0.542	0.566	0.5432	0.7008	0	0.6628	0.3333	0	0	0	0	0	0	0.5984	0	0	0	0.6221	0.3895	0.8256	0.6221	0.2035	0.564	0.5988	0.5523	0.3779	0.2766	0.3719	0.6364	0.595	0.0893	0.6235	0.5733	0.7872	0.6163	0.5203	0.6319	0.4702	0.5948	0.5029	86
TSPAN9	Candidate gene	0.5116	0.9193	0.6977	0.4351	0.566	0.5432	0.7008	0	0	0.8155	0	0	0	0	0	0	0.5984	0	0	0	0.6221	0.1047	0.8256	0.6221	0.1221	0.564	0.5988	0.5523	0.0872	0.4574	0.3471	0.7686	0.2562	0.1131	0.0235	0.5733	0.5106	0.6163	0.6081	0.184	0.6887	0.5948	0.5029	87
MPI	Candidate gene	0.5174	0.2671	0.1802	0.8626	0.566	0.5432	0.7008	0	0.6628	0.8155	0.1765	0	0.5179	0.58	0.6	0.6119	0.5984	0.6	0.2658	0.7391	0.6221	0.3081	0.2267	0.6221	0.4477	0.564	0.5988	0.5523	0.1453	0.234	0.7603	0.6942	0.9421	0.631	0.6235	0.5733	0.7092	0.6163	0.1284	0.7239	0.702	0.5948	0.5029	88
PSTPIP1	Candidate gene	0.5233	0.1429	0.1337	0.4122	0.566	0.5432	0.1969	0	0	0.8155	0.3824	0.7	0.7679	0	0.19	0.6119	0.0738	0.6	0.8861	0.9348	0.0756	0.5581	0.2965	0.6221	0.5349	0.1163	0.093	0.5523	0.5523	0.5532	0.843	0.4876	0.281	0.631	0.6235	0.5733	0.3972	0.6163	0.2162	0.8834	0.5695	0	0.5029	89
NEO1	Candidate gene	0.5291	0.1056	0.6977	0.8092	0.566	0.5432	0.7008	0	0	0.5	0.3088	0	0	0.58	0.6	0	0.5984	0	0.6962	0	0.6221	0.1686	0.5814	0.0698	0.2267	0.564	0.1047	0.5523	0.2326	0.8511	0.1405	0.9669	0.7686	0.631	0.6235	0.5733	0.6454	0.6163	0.1486	0.2638	0.4106	0.5948	0.5029	90
LRRC49	Candidate gene	0.5349	0.2671	0.2267	0.9618	0.566	0.5432	0.1969	0	0	0.8155	0	0	0	0	0	0	0.5984	0	0	0	0.6221	0.1686	0.1744	0.6221	0.1221	0.564	0.5988	0.5523	0.1453	0	0.595	0.9008	0.1736	0.1964	0.6235	0.5733	0.5248	0.6163	0.3716	0.7914	0.6358	0.5948	0.5029	91
SGMS1	Candidate gene	0.5407	0.2671	0.6977	0.7023	0.566	0.5432	0.7008	0	0.6628	0.0357	0.5147	0	0.2321	0.58	0.6	0.6119	0.5984	0	0.3038	0.7391	0.6221	0.8605	0.8256	0.6221	0.814	0.564	0.5988	0.5523	0.8488	0.9043	0.5702	0.281	0.5537	0.631	0.6235	0.5733	0.5603	0.6163	0	0.4172	0.4238	0.5948	0.5029	92
CHRNA3	Candidate gene	0.5465	0.9193	0.6977	0.3511	0.566	0.5432	0.1969	0.6667	0.3256	0.3988	0.8235	0.7	0	0	0.6	0.6119	0.0738	0.6	0.557	0.5435	0.6221	0.8605	0.8256	0.6221	0.814	0.564	0.5988	0.0581	0.8488	0.617	0.4298	0.124	0.9174	0.631	0.2118	0.5733	0.4255	0.6163	0.0743	0.0552	0.4503	0.5948	0.5029	93
CLK3	Candidate gene	0.5523	0.2671	0.3198	0.9389	0.566	0.5432	0.7008	0.6667	0	0.8155	0	0.7	0	0	0.6	0	0	0	0	0	0.6221	0.2733	0.5814	0.2267	0.4128	0.564	0.5988	0.5523	0.2733	0.6277	0.7273	0.719	0.4215	0.631	0.1529	0.5733	0.234	0.6163	0.5068	0.8221	0.5563	0.5948	0.5029	94
TSPAN3	Candidate gene	0.5581	0.9193	0.6977	0	0.566	0.5432	0.7008	0	0	0.5	0	0	0	0	0	0	0	0	0	0	0.6221	0.3081	0.4535	0.6221	0.2849	0.564	0.5988	0.5523	0.3779	0.2979	0.8926	0.2231	0.5124	0.631	0.6235	0.5733	0.234	0.6163	0.4797	0.7607	0.3113	0.0654	0.5029	95
RILPL2	Candidate gene	0.564	0.5155	0.3198	0	0.566	0.5432	0.1969	0	0	0.3988	0	0	0	0	0	0	0	0	0	0	0.6221	0.4884	0.5814	0.6221	0.814	0.564	0.5988	0.5523	0.5233	0	0	0	0	0.631	0.6235	0.12	0.3972	0.6163	0.777	0.5828	0.9272	0.5948	0.5029	96
C15orf59	Candidate gene	0.5698	0	0.6977	0	0	0.5432	0.1969	0	0	0.8155	0	0	0	0	0	0	0.5984	0	0	0	0.6221	0.1686	0.8256	0.6221	0.1221	0.564	0.5988	0.5523	0.1453	0	0	0	0	0.1964	0.6235	0.5733	0	0.2035	0	0	0	0.5948	0.5029	97
C15orf39	Candidate gene	0.5756	0	0.6977	0	0	0	0.7008	0	0	0.5	0	0	0	0	0	0	0	0	0	0	0.6221	0.1047	0.1744	0.093	0.3547	0.564	0.5988	0.5523	0.1453	0.6702	0.2562	0.8017	0.1818	0.131	0.6235	0.5733	0.3972	0.2209	0.9054	0.546	0.7815	0.5948	0.5029	98
CHRNA5	Candidate gene	0.5814	0.9193	0.6977	0.2977	0.566	0.5432	0.7008	0.6667	0.6628	0.3988	0.8235	0.7	0	0	0.6	0.6119	0.0738	0.6	0.7975	0.7391	0.6221	0.3081	0.8256	0.6221	0.2035	0.564	0.5988	0.5523	0.3779	0.6489	0.1983	0.5372	0.5207	0.131	0.6235	0.5733	0.4255	0.186	0.0608	0.2209	0.9404	0.5948	0.5029	99
PCLO	Candidate gene	0.5872	0.3975	0.6977	0.3206	0.566	0.5432	0.1969	0	0	0.8155	0	0	0	0	0.6	0	0.0738	0	0.481	0	0.6221	0.8605	0.6163	0.6221	0.814	0.564	0.5988	0.5523	0.8488	0.1383	0.3636	0.876	0.4793	0.631	0.6235	0.5733	0.4539	0.1047	0	0.6564	0.5298	0.5948	0.5029	100
PTPN9	Candidate gene	0.593	0.5155	0.3198	0.7786	0.566	0.5432	0	0	0.6628	0.8155	0	0	0	0	0	0	0.5984	0	0.3291	0	0.6221	0.2209	0.3256	0.6221	0.5058	0.564	0.5988	0.5523	0.186	0.9468	0.2893	0.6446	0.9752	0.631	0.1529	0.5733	0.234	0.6163	0.5946	0.4172	0.3179	0.1569	0.5029	101
NTN1	Candidate gene	0.5988	0.5155	0.6977	0.7328	0.566	0.5432	0.7008	0	0.6628	0.8155	0.3088	0	0	0.58	0.6	0.6119	0.5984	0	0.6456	0	0.1221	0.8605	0.8256	0.6221	0.814	0.564	0.5988	0.5523	0.8488	0	0.1488	0.405	0.8099	0.1964	0.6235	0.5733	0	0.6163	0.9122	0.0123	0.0397	0.5948	0.5029	102
GOLT1B	Candidate gene	0.6047	0.2671	0.6977	0	0.566	0.5432	0.7008	0	0	0.8155	0	0	0	0	0	0	0	0	0	0	0.6221	0.2384	0.8256	0.6221	0.2849	0.564	0.5988	0.5523	0.2093	0	0.6694	0.3802	0.5289	0.631	0.6235	0.5733	0.5319	0.6163	0.8851	0.5951	0.5828	0.5948	0.5029	103
ST3GAL4	Candidate gene	0.6105	0.2671	0.6977	0.6031	0.566	0.5432	0.7008	0	0.6628	0.5	0.1176	0	0.2321	0	0.6	0.6119	0.5984	0	0.7848	0	0.6221	0.1686	0.3256	0.6221	0.2849	0.564	0.5988	0.5523	0.3779	0.3191	0.0744	0.9587	0.8843	0.631	0.6235	0.5733	0.7092	0.6163	0.7095	0.2945	0.947	0.5948	0.5029	104
NRL	Candidate gene	0.6163	0.6957	0.0872	0.5344	0.566	0.5432	0.1969	0	0	0.8155	0	0	0	0	0.6	0	0.5984	0.6	0.8861	0.7391	0.6221	0.8605	0.8256	0.6221	0.814	0.564	0.5988	0.5523	0.8488	0.2553	0.1818	0.1322	0.6446	0.631	0.6235	0.5733	0	0.6163	0.0541	0.6196	0.0861	0.5948	0.5029	105
FDX1	Candidate gene	0.6221	0.7888	0.6977	0.2595	0.566	0.5432	0.7008	0.6667	0.0349	0.1071	0.5147	0	0.2321	0	0.6	0	0.5984	0	0	0.7391	0.6221	0.1686	0.8256	0.6221	0.3372	0.564	0.5988	0.5523	0.3779	0.3404	1	0.2893	0.9339	0.631	0.6235	0.5733	0.7092	0.6163	0.1216	0.5951	0.6026	0.0654	0.5029	106
SYT3	Candidate gene	0.6279	0.5155	0.6977	0	0.566	0.5432	0.7008	0	0.6628	0.5	0	0	0	0	0	0	0	0	0.8861	0	0.6221	0.8605	0.6163	0.6221	0.814	0.564	0.5988	0.5523	0.8488	0	0	0	0	0.631	0.6235	0	0.0071	0.6163	0	0	0.596	0.5948	0.5029	107
COMMD4	Candidate gene	0.6337	0.5155	0.6977	0	0.566	0.5432	0	0	0	0.8155	0	0	0	0	0	0	0	0	0	0	0.6221	0.4186	0.8256	0.6221	0.2849	0.564	0.5988	0.5523	0.436	0.766	0.4463	0.4628	0.2727	0.631	0.6235	0.06	0.766	0.6163	0.4392	0.2761	0.8675	0.5948	0.5029	108
CACUL1	Candidate gene	0.6395	0.6957	0.6977	0	0.566	0.5432	0	0	0	0	0	0	0	0	0	0	0.5984	0	0	0	0.6221	0.0756	0.8256	0.6221	0.2035	0.564	0.5988	0.5523	0.0872	0	0	0	0	0	0.1529	0.5733	0.8298	0.6163	0.2568	0.6748	0	0	0.5029	109
ANKRD6	Candidate gene	0.6453	0.2671	0.6977	0.9695	0.566	0.5432	0.1969	0	0	0.8155	0	0	0	0	0	0	0.5984	0	0	0	0.6221	0.2384	0.4535	0.6221	0.3547	0.564	0.5988	0.5523	0.2093	0.5319	0.4711	0.9752	0.5372	0.631	0.6235	0.5733	0.3617	0.6163	0.1689	0.7914	0.2649	0.5948	0.5029	110
ISL2	Candidate gene	0.6512	0.9193	0.1279	0.8244	0.0377	0.037	0	0	0.6628	0.8155	0	0	0	0	0	0	0	0	0.481	0	0.6221	0.2384	0.8256	0.6221	0.2384	0.564	0.5988	0.5523	0.2733	0	0	0	0	0.631	0.6235	0.5733	0.9291	0.6163	0.223	0.1227	0.1854	0.5948	0.5029	111
DCAF11	Candidate gene	0.657	0.6957	0.6977	0.8779	0.566	0.5432	0.1969	0	0.6628	0.3333	0	0	0	0	0	0	0	0	0	0	0.6221	0.3721	0.6105	0.6221	0.564	0.564	0.5988	0.0581	0.3314	0.9574	0.314	0.4545	0.5785	0.631	0.2118	0.5733	0.6454	0.6163	0.7635	0.7239	0	0.5948	0.5029	112
RAB35	Candidate gene	0.6628	0.2671	0.6977	0.6641	0.566	0.5432	0.1969	0	0	0.8155	0	0	0	0	0	0	0.5984	0	0	0	0.0465	0.1221	0.2907	0.2093	0.157	0.093	0.5988	0.5523	0.2733	0.7553	0.686	0.7521	0.405	0.631	0.6235	0.5733	0.3617	0.6163	0.8378	0.9816	0.1921	0.5948	0.5029	113
ARID3B	Candidate gene	0.6686	0.9193	0.6977	0.4733	0.566	0.5432	0.7008	0	0	0.5893	0	0	0	0	0	0	0.5984	0	0.3544	0	0.6221	0.1686	0.0988	0.6221	0.1221	0.564	0.5988	0.5523	0.1453	0	0.6116	0.9339	0.3471	0.631	0.6235	0.5733	0.2624	0.6163	0.8986	0.9018	0.4172	0.1699	0.5029	114
SNUPN	Candidate gene	0.6744	0.2671	0.3198	0.9237	0.566	0.5432	0.7008	0	0.6628	0.8155	0.8235	0	0	0.58	0.6	0.6119	0	0	0	0	0.6221	0.4186	0.3023	0.6221	0.4651	0.564	0.5988	0.5523	0.4942	0.4681	0	0	0	0.631	0.6235	0.5733	0.5957	0.2093	0.4595	0.7239	0.9139	0.5948	0.5029	115
CHRNB4	Candidate gene	0.6802	0.4099	0.6977	0.4656	0.566	0.5432	0.7008	0.6667	0.6628	0.3988	0.8235	0.7	0	0	0.6	0.6119	0.0738	0	0.5823	0	0.6221	0.8605	0.8256	0.6221	0.814	0.564	0.5988	0.5523	0.8488	0.7021	0.2397	0.0661	0.8264	0.631	0.6235	0.5733	0.9291	0.6163	0.25	0.0552	0.7417	0.5948	0.5029	116
CCDC33	Candidate gene	0.686	0.6957	0.6977	0.3359	0.566	0.5432	0.1969	0	0	0.5893	0	0	0	0	0	0	0.5984	0	0	0	0.6221	0.6919	0.6512	0.6221	0.6279	0.564	0.5988	0.5523	0.6977	0	0.4628	0.3471	0.719	0.631	0.6235	0.5733	0.9291	0.6163	0.3446	0.8773	0.9073	0.5948	0.5029	117
LRRC32	Candidate gene	0.6919	0.9193	0.6977	0.6565	0.566	0.5432	0.7008	0	0	0.1548	0	0	0	0	0	0	0.5984	0	0	0	0.157	0.8605	0.8256	0.6221	0.814	0.564	0.5988	0.5523	0.8488	0.6383	0.8595	0.0413	0.2314	0.631	0.6235	0.06	0.0638	0.6163	0.4662	0.2454	0.5497	0	0.5029	118
LOXL1	Candidate gene	0.6977	0.8385	0.6977	0.8397	0.566	0.5432	0.7008	0	0.6628	0.0357	0.8235	0	0	0	0.6	0	0.0738	0.6	1	0.7391	0.6221	0.3895	0.8256	0.6221	0.814	0.564	0.5988	0.5523	0.5233	0.4043	0.8678	0.7934	0.3223	0.1964	0.6235	0.06	0.1631	0.6163	0.7297	0.5337	0.0662	0.5948	0.5029	119
ARHGAP20	Candidate gene	0.7035	0.2671	0.6977	0.5267	0.566	0.5432	0.7008	0	0	0.8155	0.8235	0	0	0	0.6	0.6119	0.5984	0	0	0	0.6221	0.8605	0.8256	0.0698	0.814	0.564	0.5988	0.5523	0.8488	0	0	0	0	0.631	0.6235	0.5733	0.773	0.6163	0.7905	0.3742	0.457	0.5948	0.5029	120
LINGO1	Candidate gene	0.7093	0.6957	0.6977	0.6489	0.566	0.5432	0.7008	0	0.6628	0.8155	0.8235	0	0	0.58	0.6	0.6119	0.5984	0	0.8861	0	0.6221	0.8605	0.5814	0.6221	0.814	0.564	0.5988	0.5523	0.8488	0	0	0	0	0.631	0.6235	0.5733	0.773	0.6163	0.3986	0.2209	0.106	0.5948	0.5029	121
B3GNT6	Candidate gene	0.7151	0.2671	0.6977	0	0.566	0	0	0	0	0.244	0	0	0.2321	0	0.6	0.6119	0	0	0.3924	0	0.6221	0.1047	0.8256	0.6221	0.814	0.564	0.5988	0.5523	0.8488	0	0	0	0	0.631	0.6235	0	0	0.6163	0	0	0	0	0.5029	122
B3GNT6	Candidate gene	0.7209	0.2671	0.6977	0	0.566	0.5432	0.7008	0	0	0.244	0.1765	0	0.2321	0	0.6	0.6119	0	0	0.3924	0	0.6221	0.1047	0.8256	0.6221	0.814	0.564	0.5988	0.5523	0.8488	0	0	0	0	0.631	0.6235	0.5733	0.9291	0.6163	0	0.4663	0	0	0.5029	123
UBL7	Candidate gene	0.7267	0	0.6977	0.9466	0.566	0.5432	0	0	0	0.3988	0	0	0	0	0	0	0	0	0	0	0.6221	0.7151	0.6395	0.1744	0.5988	0.564	0.5988	0.5523	0.6744	0	0	0	0	0.631	0.0647	0.5733	0.1631	0.6163	0.3378	0.7239	0.8874	0.5948	0.5029	124
CPLX3	Candidate gene	0.7326	0.5155	0.1453	0	0.566	0.5432	0.1969	0	0	0.8155	0	0	0	0	0.6	0	0.5984	0	0.6962	0	0.6221	0.8605	0.8256	0.6221	0.814	0.564	0.5988	0.0756	0.8488	0	0	0	0	0.1964	0.6235	0	0	0.6163	0	0	0.5166	0.5948	0.5029	125
STRA6	Candidate gene	0.7384	0.1366	0.0872	0.5878	0.566	0.5432	0.7008	0	0.6628	0.8155	0.8235	0	0.4107	0	0.6	0	0.0738	0.6	0.6076	0.2174	0.6221	0.1686	0.8256	0.6221	0.814	0.564	0.5988	0.5523	0.1453	0	0.7025	0.8926	0.9091	0.631	0.6235	0.5733	0.305	0.6163	0.9189	0.7914	0.6424	0	0.5029	126
FAM219B	Candidate gene	0.7442	0	0.6977	0	0	0.5432	0.7008	0	0	0.8155	0	0	0	0	0	0	0	0	0	0	0.6221	0.1686	0.1744	0.6221	0.814	0.564	0.5988	0.5523	0.1453	0	0	0	0	0.631	0.0647	0	0.2057	0.1744	0.6351	0.9448	0	0	0.5029	127
KIRREL3	Candidate gene	0.75	0.6957	0.0872	0.229	0.566	0.5432	0.7008	0	0	0.8155	0.8235	0	0	0	0.6	0	0.5984	0.6	0	0.5435	0.6221	0.8605	0.8256	0.6221	0.814	0.564	0.5988	0.5523	0.8488	0	0	0	0	0.631	0.6235	0.5733	0	0.6163	0.4189	0.3313	0.8742	0	0.5029	128
SNX33	Candidate gene	0.7558	0.6957	0.6977	0	0.566	0.5432	0	0	0	0.2202	0	0	0	0	0.6	0	0	0	0	0	0.6221	0.8605	0.8256	0.6221	0.814	0.564	0.5988	0.5523	0.8488	0	0	0	0	0.631	0.6235	0.5733	0.3972	0.6163	0.6014	0.1227	0.7748	0.5948	0.5029	129
ZC3H12C	Candidate gene	0.7616	0.9193	0.6977	0.3282	0.566	0.5432	0	0	0	0.8155	0	0	0	0	0	0	0.5984	0	0	0	0.6221	0.8605	0.4535	0.6221	0.814	0.564	0.5988	0.5523	0.8488	0	0	0	0	0.631	0.6235	0.5733	0.8298	0.6163	0.4054	0.0184	0.6093	0.5948	0.5029	130
MRPS36	Candidate gene	0.7674	0.2671	0.6977	0.5725	0	0	0	0	0	0.8155	0	0	0	0	0	0	0	0	0	0	0.6221	0.5581	0.8256	0.6221	0.1221	0.564	0.5988	0.5523	0.6047	0	0	0	0	0.631	0.1529	0	0	0.6163	0	0	0.8344	0.5948	0.5029	131
SCAMP5	Candidate gene	0.7733	0.5155	0.6977	0	0.566	0.5432	0.7008	0	0	0.8155	0	0	0	0	0	0	0	0	0	0	0.6221	0.8605	0.5174	0.6221	0.814	0.564	0.5988	0.5523	0.8488	0.1064	0.5289	0.9091	0.7107	0.631	0.6235	0.5733	0.2766	0.6163	0	0.5706	0.2517	0.0654	0.5029	132
MGAT5	Candidate gene	0.7791	0.2671	0.6977	0.7481	0.566	0.5432	0.1969	0	0.2093	0.8155	0.1765	0	0.2321	0	0.6	0.6119	0.5984	0	0.7595	0	0.1744	0.8605	0.8256	0.6221	0.814	0.564	0.5988	0.5523	0.8488	0.5638	0.5041	0.9256	0.8595	0.631	0.0647	0.5733	0.4539	0.1453	0.8311	0.2209	0.9007	0.5948	0.5029	133
STOML1	Candidate gene	0.7849	0.6957	0.6977	0.9542	0.566	0.5432	0.7008	0	0	0.8155	0	0	0	0	0	0	0	0	0	0	0.6221	0.4186	0.8256	0.6221	0.814	0.564	0.5988	0.5523	0.3314	0.1702	0.5537	0.843	0.1983	0.631	0.6235	0.5733	0.3972	0.6163	0.277	0.7914	0.4636	0.5948	0.5029	134
CYP1A2	Candidate gene	0.7907	0.8261	0.157	0.2137	0.566	0.5432	0.7008	0.2381	0.6628	0.119	0.5147	0.7	0.4107	0.58	0.6	0.6119	0.1721	0.6	0.5696	0.8913	0.6221	0.8605	0.5465	0.6221	0.814	0.564	0.5988	0.5523	0.8488	0.9255	0.9174	0.562	0.8512	0.631	0.6235	0.5733	0.9291	0.6163	0.6622	0.0552	0.894	0.1699	0.5029	135
MRPS36	Candidate gene	0.7965	0.2671	0.6977	0.5725	0	0	0.7008	0	0	0.8155	0	0	0	0	0	0	0	0	0	0	0.2209	0.5581	0.8256	0.6221	0.1221	0.564	0.5988	0.5523	0.6047	0	0	0	0	0.631	0.1529	0.5733	0.7092	0.6163	0.8649	0.865	0.8344	0.5948	0.5029	136
TBC1D21	Candidate gene	0.8023	0.1118	0.6977	0	0.566	0.5432	0	0	0	0.8155	0	0	0	0	0	0	0	0	0	0	0.6221	0.1686	0.8256	0.6221	0.814	0.564	0.5988	0.5523	0.1453	0	0	0	0	0.631	0.6235	0.5733	0.9291	0.6163	0.6554	0.7914	0.5033	0.5948	0.5029	137
ISLR	Candidate gene	0.8081	0.9193	0.6977	0	0.566	0.5432	0.7008	0	0	0.8155	0	0	0	0	0	0	0	0	0	0	0.0581	0.8605	0.8256	0.6221	0.814	0.564	0.5988	0.5523	0.8488	0.7234	0.4793	0.0992	0.3058	0.631	0.6235	0.5733	0.7518	0.6163	0.6689	0.2454	0.1457	0.5948	0.5029	138
RABL6	Candidate gene	0.814	0.5155	0.3198	0.8931	0.566	0.5432	0.1969	0	0	0.5	0	0	0	0	0	0	0	0	0	0	0.6221	0.7035	0.8256	0.6221	0.814	0.564	0.5988	0.5523	0.6453	0	0.562	0.9174	0.7521	0	0.6235	0.5733	0.1348	0.6163	0	0.3742	0	0	0.5029	139
PRLHR	Candidate gene	0.8198	0.9193	0.6977	0.1374	0.566	0.5432	0.7008	0	0	0.8155	0.8235	0.7	0.3571	0.58	0.6	0.6119	0.5984	0	0.2785	0.3261	0.6221	0.8605	0.8256	0.6221	0.814	0.564	0.5988	0.5523	0.8488	0	0	0	0	0.631	0.6235	0	0.9291	0.6163	0.6419	0.2699	0.6291	0.5948	0.5029	140
POU2AF1	Candidate gene	0.8256	0.9193	0.6977	0.145	0.566	0.5432	0.7008	0	0	0.8155	0	0	0	0	0	0	0.5984	0	0.6076	0	0.6221	0.8605	0.6453	0.6221	0.814	0.564	0.5988	0.0349	0.8488	0.6064	0.9339	0.0744	0.438	0.631	0.6235	0.5733	0	0.6163	0.2365	0.9202	0.6623	0.5948	0.5029	141
FAM45A	Candidate gene	0.8314	0	0.6977	0	0	0.5432	0	0	0	0.5	0	0	0	0	0	0	0	0	0	0	0.6221	0.8605	0.3256	0.6221	0.814	0.564	0.5988	0.5523	0.8488	0	0	0	0	0.631	0.6235	0	0.6454	0.6163	0.8176	0.7239	0	0.5948	0.5029	142
IL31	Candidate gene	0.8372	0.6957	0.6977	0	0	0.5432	0.7008	0	0	0.8155	0	0	0	0	0.6	0	0.5984	0	0	0	0.6221	0.8605	0.8256	0.6221	0.814	0.564	0.5988	0.5523	0.8488	0	0	0	0	0.1488	0	0	0	0.6163	0	0	0.7881	0.5948	0.5029	143
TANC2	Candidate gene	0.843	0.9193	0.6977	0.9771	0.566	0.5432	0.7008	0	0	0.3988	0	0	0	0	0	0	0.5984	0	0.6962	0	0.2326	0.8605	0.1744	0.6221	0.6105	0.564	0.5988	0.5523	0.8488	0.1489	0.2066	0.8347	0.8678	0.631	0.6235	0.5733	0	0.6163	0.473	0.3129	0.1722	0.0654	0.5029	144
SENP8	Candidate gene	0.8488	0.9193	0.6977	0	0.566	0.5432	0	0	0	0.5893	0	0	0	0	0	0	0	0	0	0	0.6221	0.3895	0.5291	0.6221	0.814	0.564	0.5988	0.5523	0.4244	0	0	0	0	0.631	0.6235	0.5733	0.8298	0.1337	0.8514	0.8466	0.7285	0.5948	0.5029	145
ST7L	Candidate gene	0.8547	0.9193	0.6977	0	0.566	0.5432	0.7008	0	0	0.8155	0	0	0	0	0	0	0	0	0	0	0.6221	0.1686	0.8256	0.6221	0.814	0.564	0.5988	0.5523	0.1453	0	0.7355	0.3967	0.876	0.631	0.6235	0.5733	0.5603	0.1977	0.5676	0.9018	0.3709	0.5948	0.5029	146
PARP6	Candidate gene	0.8605	0.9193	0.6977	0.1985	0.566	0.5432	0	0	0.2093	0.8155	0	0	0	0	0	0	0.5984	0	0	0	0.6221	0.8605	0.8256	0.6221	0.814	0.564	0.5988	0.5523	0.8488	0	0.2231	0.6116	0.4959	0.631	0.6235	0.06	0.3404	0.6163	0.9459	0.8528	0.6093	0.5948	0.5029	147
MLXIP	Candidate gene	0.8663	0.5155	0.3198	0.7939	0.566	0.5432	0.1969	0	0	0.3333	0	0	0	0	0	0	0	0	0	0	0.6221	0.8605	0.5814	0.6221	0.814	0.564	0.5988	0.5523	0.8488	0.8936	0.2479	0.8264	0.6777	0.631	0.0941	0.5733	0.1844	0.6163	0.7973	0.9632	0.6689	0.0654	0.5029	148
CRABP1	Candidate gene	0.8721	0.2671	0.3198	0.7863	0.566	0.5432	0	0.6667	0.6628	0.3988	0	0.7	0.4107	0	0.6	0	0.5984	0	0.9873	0	0.6221	0.3081	0.8256	0.6221	0.814	0.564	0.5988	0.5523	0.3779	0.8723	0.6281	0.8182	0.9917	0.631	0.6235	0.12	0.7872	0.6163	0.8041	0.5706	0.2318	0.5948	0.5029	149
GPR142	Candidate gene	0.8779	0.2671	0.6977	0	0.566	0.5432	0.7008	0	0	0.8155	0	0	0	0	0	0	0	0	0	0	0.6221	0.8605	0.8256	0.6221	0.814	0.564	0.5988	0.5523	0.8488	0	0	0	0	0.631	0.6235	0	0	0.6163	0	0	0	0	0	150
CYP1A1	Candidate gene	0.8837	0.8075	0.157	0.2519	0.566	0.5432	0.7008	0.2381	0.2791	0.0952	0.5147	0.7	0.4107	0.58	0.6	0.6119	0.1639	0	0.3418	0.4348	0.1628	0.8605	0.4535	0.6221	0.814	0.564	0.5988	0.5523	0.8488	1	0.9669	0.9421	0.9587	0.0893	0.6235	0	0	0.6163	0.4459	0.0552	0.9205	0.5948	0.5029	151
HMCN2	Candidate gene	0.8895	0.9193	0.6977	0	0.566	0.5432	0.7008	0	0	0.8155	0	0	0	0	0	0	0.5984	0	0	0	0.6221	0.8605	0.8256	0.6221	0.814	0.564	0.5988	0.5523	0.8488	0	0	0	0	0.631	0.6235	0.5733	0.8298	0.6163	0.4122	0.8896	0.8013	0.5948	0.5029	152
C11orf53	Candidate gene	0.8953	0	0.6977	0	0	0	0.7008	0	0	0	0	0	0	0	0	0	0.5984	0	0	0	0.6221	0.1686	0.1744	0.6221	0.814	0.564	0.5988	0.5523	0.1453	0	0	0	0	0.631	0.6235	0	0.9291	0.6163	0.9595	0.865	0.3311	0.5948	0.5029	153
CSTF2T	Candidate gene	0.9012	0.9193	0.6977	0.5115	0.566	0.5432	0	0	0	0.5893	0	0.7	0.9464	0	0.6	0	0.5984	0	0.8861	0	0.6221	0.6395	0.8256	0.6221	0.5058	0.564	0.5988	0.5523	0.6453	0.6809	0.4959	0.3884	0.9504	0.631	0.6235	0.5733	0.7092	0.6163	0.6486	0.9693	0.8609	0.5948	0.5029	154
COA1	Candidate gene	0.907	0.2671	0.6977	0	0.566	0.5432	0.7008	0	0	0.8155	0	0	0	0	0	0	0	0	0	0	0.6221	0.3081	0.8256	0.6221	0.2849	0.564	0.5988	0.5523	0.2733	0.7766	0.0909	0.5868	0.7934	0	0.1529	0.5733	0.6454	0.6163	1	0.9755	0	0	0.5029	155
ODF3L1	Candidate gene	0.9128	0	0.6977	0	0.566	0.5432	0	0	0	0.8155	0	0	0	0	0	0	0	0	0	0	0.6221	0.8605	0.8256	0.6221	0.814	0.564	0.5988	0.5523	0.8488	0	0	0	0	0.631	0.6235	0.5733	0.8298	0.6163	0.9392	0.4663	0.8543	0.5948	0.5029	156
TSKU	Candidate gene	0.9186	0.9193	0.6977	0	0.566	0.5432	0.7008	0	0.6628	0.1964	0	0	0	0	0	0	0	0	0.8861	0	0.6221	0.8605	0.8256	0.6221	0.814	0.564	0.5988	0.5523	0.8488	0	0.9256	0.9835	0.8017	0.631	0.0235	0.12	0.1631	0.6163	0.5135	0.2454	0.4834	0.5948	0.5029	157
ALS2CR12	Candidate gene	0.9244	0.5155	0.6977	0.1527	0.566	0	0.1969	0	0	0.8155	0	0	0	0	0	0	0.5984	0	0	0	0.6221	0.8605	0.4535	0.1221	0.2849	0.564	0.5988	0.5523	0.8488	0	0	0	0	0.631	0.6235	0	0.9291	0.6163	0.0811	0.9325	1	0.5948	0.5029	158
A1CF	Candidate gene	0.9302	0.5155	0.3198	0.8855	0.566	0.5432	0	0	0	0.8155	0.8235	0	0	0	0.6	0.6119	0.5984	0	0.6962	0.5435	0.6221	0.8605	0.3895	0.6221	0.814	0.564	0.5988	0.5523	0.8488	0	0.0661	0.9917	0.7769	0.631	0.6235	0.5733	0.9291	0.6163	0.9324	0.1227	0.5894	0.5948	0.5029	159
VWC2	Candidate gene	0.936	0.9193	0.6977	0	0.566	0.5432	0.7008	0	0	0.8155	0	0	0	0	0	0	0	0	0	0	0.6221	0.8605	0.8256	0.6221	0.814	0.564	0.5988	0.5523	0.8488	0	0	0	0	0.1131	0	0.5733	0.9291	0.6163	0	0.5337	0.7483	0.5948	0.5029	160
RPP25	Candidate gene	0.9419	0.5155	0.6977	0.916	0.566	0.5432	0	0	0	0.8155	0	0	0.9464	0	0.6	0	0	0	0	0	0.6221	0.8605	0.8256	0.6221	0.814	0.564	0.5988	0.5523	0.8488	0	0.6446	0.6198	0.7438	0.631	0.6235	0.5733	0.9291	0.6163	0.5743	0.9141	0.8344	0.5948	0.5029	161
TMEM71	Candidate gene	0.9477	0.9193	0.6977	0	0	0.5432	0.7008	0	0	0.8155	0	0	0	0	0	0	0.5984	0	0	0	0.6221	0.8605	0.3256	0.6221	0.814	0.564	0.5988	0.5523	0.8488	0	0	0	0	0.1964	0.6235	0	0.5957	0.1802	0.5338	0.7914	0.9669	0.5948	0.5029	162
NRG4	Candidate gene	0.9535	0.6957	0.6977	0	0.566	0	0.7008	0	0	0.8155	0.3824	0.7	0.7679	0.58	0.16	0.6119	0	0	0.8861	0	0.6221	0.8605	0.8256	0.6221	0.814	0.564	0.5988	0.5523	0.8488	0	0	0	0	0.0893	0.6235	0.5733	0.3617	0.6163	0.3514	1	0.9603	0.5948	0.5029	163
LMAN1L	Candidate gene	0.9593	0.2671	0.6977	0.4275	0.1132	0.5432	0.1969	0	0	0.8155	0	0	0.9464	0	0	0	0.5984	0	0	0	0.6221	0.8605	0.8256	0.6221	0.814	0.564	0.5988	0.5523	0.8488	0	0	0	0	0.1964	0.6235	0.5733	0.9291	0.6163	0.8108	0.638	0.9801	0.5948	0.5029	164
TMEM202	Candidate gene	0.9651	0.9193	0.6977	0	0	0	0.7008	0	0	0.8155	0	0	0	0	0	0	0	0	0	0	0.6221	0.8605	0.8256	0.6221	0.814	0.564	0.5988	0.5523	0.8488	0	0	0	0	0.631	0.6235	0	0.9291	0.6163	0	0.9018	0.7152	0	0.5029	165
FAM204A	Candidate gene	0.9709	0	0.6977	0.1603	0	0	0.1969	0	0	0.5	0	0	0	0	0	0	0.5984	0	0	0	0.6221	0.8605	0.1744	0.6221	0.814	0.564	0.5988	0.5523	0.8488	0	0.281	0.8843	1	0.631	0.6235	0	0	0.6163	0	0.9571	0	0	0.5029	166
LRRC43	Candidate gene	0.9767	0	0.6977	0	0.566	0	0	0	0	0.8155	0	0	0	0	0	0	0	0	0	0	0.6221	0.8605	0.8256	0.6221	0.814	0.564	0.5988	0.5523	0.8488	0	0	0	0	0.1964	0.6235	0.5733	0.9291	0.6163	0.8243	0.8282	0.9801	0.5948	0.5029	167
CIB4	Candidate gene	0.9826	0.9193	0.6977	0	0.0943	0.5432	0	0	0	0.8155	0	0	0	0	0	0	0.5984	0	0	0	0.6221	0.8605	0.8256	0.6221	0.814	0.564	0.5988	0.5523	0.8488	0	0	0	0	0.631	0.6235	0.5733	0.9291	0.6163	0.9662	0.8405	0.9272	0	0.5029	168
C2orf70	Candidate gene	0.9884	0	0.6977	0	0.566	0.5432	0.7008	0	0	0	0	0	0	0	0	0	0	0	0	0	0.6221	0.8605	0.8256	0.6221	0.814	0.564	0.5988	0.5523	0.8488	0	0	0	0	0.631	0.6235	0.5733	0.9291	0.6163	0.9932	0.9202	0	0.5948	0.5029	169
LCN15	Candidate gene	0.9942	0.9193	0.6977	0	0.566	0.5432	0.7008	0	0.6628	0.8155	0	0	0	0	0	0	0	0	0	0	0.6221	0.8605	0.8256	0.6221	0.814	0.564	0.5988	0.5523	0.8488	0	0	0	0	0.1964	0.6235	0	0.9291	0.6163	0.3041	0.9939	0	0	0.5029	170
ZPBP	Candidate gene	1	0.2671	0.6977	0.8168	0.566	0.5432	0.7008	0	0	0.8155	0	0	0	0	0	0	0	0	0.8861	0	0.6221	0.8605	0.8256	0.6221	0.814	0.564	0.5988	0.5523	0.8488	0.9681	0.9835	0.0909	0.9669	0.631	0.6235	0.5733	0.9291	0.6163	0.7432	0.2454	0.245	0	0.5029	171

## Sheet: Reining_Skeletal_Muscle
Gene name	Group	P-value	Annotation â€“ Gene Ontology	Annotation â€“ UniProt	Text-mining	Annotation â€“ InterPro	Annotation â€“ Pfam	Annotation â€“ SIMAP (localization)	Annotation â€“ DrugBank	Annotation â€“ Stitch	Annotation â€“ RGD ChEBI	Annotation â€“ Reactome	Annotation â€“ WikiPathways	Annotation â€“ RGD pathways	Annotation â€“ BioCarta	Annotation â€“ CPDB	Annotation â€“ hiPathDB	Annotation â€“ GAD	Annotation â€“ OMIM	Annotation â€“ RGD MP	Annotation â€“ RGD RDO	Interaction â€“ String	Interaction â€“ BioGrid	Interaction â€“ I2D	Interaction â€“ IntAct	Interaction â€“ iRefIndex	Interaction â€“ Mint	Interaction â€“ HPRD	Interaction â€“ MIPS	Interaction â€“ GeneRIF	Expression â€“ Su et al (2002)	Expression â€“ Su et al (2004)	Expression â€“ CMAP	Expression â€“ Lukk et al	Annotation â€“ PaGenBase	Annotation â€“ CGAP	Annotation â€“ GNF	Annotation â€“ eGenetics	Blast	Precalculated â€“ Ouzounis	Precalculated â€“ Prospectr	Precalculated â€“ HaploPred	Annotation â€“ Aura	Annotation â€“ mirZ	id
ACTA1	Training gene	0.0104	0.0109	0.0104	0.0822	0.0319	0.044	0	0.0769	0	0.0737	0	0.0357	0	0.0476	0.1167	0.3226	0.1618	0.0313	0.0571	0.0286	0.0417	0.0521	0.0521	0.0417	0.0521	0.0313	0.0521	0.5729	0.0521	0.0426	0.0154	0.1692	0.0154	0.0106	0.2083	0.0241	0	0.0521	0.0854	0.5581	0.0682	0.5824	0.5054	0
GYS1	Training gene	0.0208	0.7826	0.0833	0.0959	0.0745	0.0769	0	0	0.1556	0.1158	0.04	0.2143	0.087	0.0952	0.05	0.0323	0.0294	0.1875	0.1714	0.2571	0.1458	0.0521	0.0521	0.0417	0.0521	0.0313	0.0521	0.5729	0.0521	0.0638	0.0615	0.1846	0.0769	0.0426	0.1146	0.0843	0.0658	0.0521	0.0976	0.2209	0.3523	0.1648	0.5054	1
RYR1	Training gene	0.0313	0.0326	0.3438	0.1233	0.0532	0.033	0.1806	0.1538	0.0222	0.2947	0.32	0.1429	0.1739	0	0.0167	0.2903	0.0147	0.0625	0.1429	0.0857	0.0625	0.0521	0.0521	0.0417	0.0521	0.0313	0.0521	0.5729	0.0521	0.1277	0.0308	0.1385	0.0462	0.0851	0.25	0.0482	0.1842	0.0521	0	0.0116	0.5341	0.5824	0.5054	2
ACTB	Training gene	0.0417	0.0217	0.0417	0.137	0.0319	0.044	0	0	0	0.0947	0.28	0.0714	0.2174	0.1905	0.0833	0.1613	0.6176	0.125	0.0286	0.1429	0.0104	0.0521	0.0521	0.0417	0.0521	0.0313	0.0521	0.0104	0.0521	0.1064	0.4462	0.4308	0.1231	0.1596	0.0521	0.0843	0.4211	0.0521	0.0732	0.4884	0.0227	0.1319	0.5054	3
SLC2A4	Training gene	0.0521	0.0978	0.1146	0.1507	0.0957	0.1209	0.1806	0	0.0444	0.1474	0.08	0.1786	0.0435	0.1429	0.0667	0.0645	0.2206	0.2188	0.0857	0.1714	0.1458	0.0521	0.0521	0.0417	0.0521	0.0313	0.0521	0.5729	0.0521	0.0851	0.4154	0.0769	0.1077	0.0426	0.1563	0.5783	0.0921	0.0521	0.1829	0.4884	0.375	0.5824	0.5054	4
MYH1	Training gene	0.0625	0.0652	0.0938	0.0685	0.117	0.0879	0.1806	0	0	0.0421	0	0	0.1304	0	0.15	0.0968	0.2059	0	0.3143	0	0.0104	0.0521	0.0521	0.0417	0.0521	0.5521	0.0521	0.5729	0.0521	0	0.0462	0.0154	0.0308	0.0319	0.25	0.1084	0.1447	0.0521	0.4512	0.6395	0.1477	0.5824	0.5054	5
MICAL1	Training gene	0.0729	0.0435	0.0208	0.0137	0.0106	0.011	0.1806	0	0	0.2211	0	0	0	0	0	0	0	0	0	0	0.25	0.0521	0.0521	0.6354	0.0521	0.0313	0.0521	0.0104	0.0521	0	0.5538	0.4923	0.1385	0.5851	0.6354	0.5783	0.3026	0.0521	0.9146	0.4884	0.9545	0.044	0.5054	6
MSTN	Training gene	0.0833	0.087	0.7813	0.1644	0.0851	0.1099	0.6806	0	0.1333	0.0526	0	0.25	0	0	0.2	0	0.1765	0.1563	0.2	0.2286	0.1458	0.0521	0.0521	0.6354	0.0521	0.5521	0.0521	0.5729	0.0521	0.1702	0.2769	0.0462	0.0923	0.0213	0.6354	0.5783	0.0132	0.0521	0.2195	0.5465	0.1023	0.5824	0.5054	7
MICAL2	Training gene	0.0938	0.0435	0.0208	0.0274	0.0213	0.022	0	0	0	0.1684	0	0	0	0	0	0	0.6176	0	0	0	0.25	0.0521	0.0521	0.6354	0.0521	0.5521	0.5938	0.5729	0.0521	0.1915	0.4923	0.4462	0.1692	0.5851	0.0104	0.5783	0.3289	0.0521	0.561	0.1279	0.3409	0.044	0.5054	8
SEPN1	Training gene	0.1042	0.4891	0.2813	0.1096	0.1596	0.5714	0.6806	0	0.1778	0.3895	0	0	0	0	0.6	0	0	0.0938	0.2857	0.0571	0.0417	0.0521	0.0521	0.0417	0.0521	0.5521	0.5938	0.5729	0.0521	0	0	0	0	0.5851	0.1563	0	0.1316	0.0521	0.1951	0.3837	0.6818	0.044	0.5054	9
RDX	Candidate gene	0.1146	0.1413	0.0625	0.5479	0.5851	0.5714	0.1806	0.6923	0.6444	0.3895	0.44	0.3571	0	0	0.6	0.1935	0.6176	0.625	0.6286	0.5143	0.125	0.5833	0.2083	0.1667	0.3542	0.5521	0.1354	0.5729	0.3229	0.8085	0.5231	0.2462	0.6462	0.0957	0.6354	0.5783	0.2763	0.2083	0.4024	0.3256	0.2159	0.044	0.5054	10
ITGB2	Candidate gene	0.125	0.6413	0.1979	0.2603	0.5851	0.5714	0.6806	0.6923	0.6444	0.1789	0.56	0.2857	0.2609	0.619	0.1667	0.2258	0.0882	0.625	0.5429	0.2	0.6354	0.5417	0.5	0.6354	0.4688	0.5521	0.1458	0.0313	0.5729	0.6596	0.8923	0.7538	0.3692	0.1277	0.6354	0.5783	0.0263	0.6667	0.0122	0.0698	0.4432	0.5824	0.5054	11
TAGLN	Candidate gene	0.1354	0.1087	0.1042	0.274	0.0638	0.0659	0	0	0.2667	0.0316	0	0	0.8696	0.619	0.6	0	0.6176	0	0.2286	0	0.0313	0.2708	0.1563	0.2083	0.1146	0.5521	0.0521	0.5729	0.25	0.4468	0.9231	0.9846	0.3385	0.5851	0.0313	0.0843	0.2763	0.6667	0.5122	0.5581	0.1705	0.5824	0.5054	12
SEPT2	Candidate gene	0.1458	0.7065	0.3646	0.3562	0.5851	0.5714	0.1806	0	0.6444	0.2632	0	0	0	0.619	0.6	0.6774	0.6176	0	0	0	0.6354	0.4063	0.4167	0.6354	0.6042	0.5521	0.1563	0.5729	0.5	0.2979	0.6769	0.3692	0.8769	0.1383	0.6354	0.1446	0.2237	0.25	0.122	0.1628	0.5227	0.044	0.5054	13
PPP1R13B	Candidate gene	0.1563	0.4891	0.4792	0.6438	0.5851	0.5714	0.1806	0	0.6444	0.7895	0	0	0	0	0.6	0.6774	0.6176	0	0.5714	0	0.6354	0.3229	0.375	0.2188	0.2604	0.5521	0.5938	0.5729	0.4896	0.1489	0.1692	0.8	0.3231	0.5851	0.6354	0.5783	0.6447	0.2813	0.5976	0.1279	0.6364	0.1429	0.5054	14
PCK2	Candidate gene	0.1667	0.4891	0.7813	0.2466	0.5851	0.5714	0.6806	0	0.0889	0.0211	0.12	0.4286	0.8261	0.619	0.1333	0.129	0.6176	0.625	0	0.5143	0.2292	0.1354	0.1146	0.0833	0.125	0.5521	0.5938	0.5729	0.1354	0.7021	0.9538	0.7846	0.7077	0.5851	0.6354	0.5783	0.1053	0.6667	0.2683	0.2209	0.5	0.5824	0.5054	15
KPNB1	Candidate gene	0.1771	0.4891	0.4792	0.4795	0.5851	0.5714	0	0	0.6444	0.3158	0.76	0.7857	0	0.619	0.6	0.6774	0.6176	0	0.7714	0	0.2083	0.3854	0.2188	0.1875	0.5	0.0938	0.1771	0.5729	0.4063	0.2128	0.6154	0.3385	0.5231	0.5851	0.6354	0.5783	0.2237	0.6667	0.8171	0.5233	0.0114	0.1099	0.5054	16
SRPK1	Candidate gene	0.1875	0.4891	0.4792	0.589	0.5851	0.5714	0.1806	0	0.6444	0.5368	0	0.7857	0	0	0.6	0	0.6176	0	0	0	0.6354	0.4167	0.5417	0.2604	0.7083	0.5521	0.5938	0.1042	0.4792	0.234	0.3692	0.3538	0.2154	0.5851	0.6354	0.5783	0.7763	0.6667	0.5488	0.1279	0.3182	0.5824	0.5054	17
COX7A1	Training gene	0.1979	0.7283	0.7813	0.0411	0.1064	0.0989	0.6806	0.2308	0.6444	0.1789	0	0.5357	0.3913	0	0.6	0	0.6176	0	0.3429	0	0.6354	0.9063	0.8021	0.6354	0.875	0.5521	0.5938	0.5729	0.9063	0.0213	0.0769	0.0308	0.0615	0.0745	0.0833	0.012	0.1579	0.1146	0.9634	0.9767	0.7159	0.5824	0.5054	18
CLTA	Candidate gene	0.2083	0.2717	0.7813	0.1918	0.5851	0.5714	0.1806	0	0.6444	0.4737	0.64	0	0.7826	0.619	0.6	0.6774	0.6176	0	0	0	0.6354	0.2083	0.1979	0.1979	0.3333	0.5521	0.125	0.5729	0.2396	0.4894	0.7231	0.6308	0.2615	0.5851	0.1563	0.5783	0.2237	0.6667	0.5732	0.8488	0.6136	0.5824	0.5054	19
KIAA0368	Candidate gene	0.2188	0.2717	0.3646	0.5342	0.5851	0.5714	0.6806	0	0	0.3368	0	0	0	0	0	0	0.6176	0	0	0	0.6354	0.7813	0.1354	0.6354	0.6979	0.5521	0.5938	0.5729	0.7917	0.4043	0.2615	0.3231	0.1846	0.5851	0.6354	0.5783	0.3553	0.1875	0.4878	0.3837	0.375	0.5824	0.5054	20
STK25	Candidate gene	0.2292	0.4891	0.4792	0.726	0.5851	0.5714	0.1806	0	0.6444	0.7895	0	0	0	0	0	0	0	0	0	0	0.2083	0.5313	0.5313	0.6354	0.6146	0.5521	0.5938	0.5729	0.5417	0.5957	0.2308	0.7077	0.1538	0.5851	0.1563	0.1446	0.7237	0.6667	0.3537	0.3256	0.5568	0.5824	0.5054	21
HECW1	Candidate gene	0.2396	0.2717	0.4792	0.8356	0.5851	0.5714	0.1806	0	0.6444	0.4737	0	0	0	0	0	0	0.6176	0	0	0	0.6354	0.5938	0.4063	0.6354	0.4167	0.5521	0.5938	0.5729	0.5417	0.8298	0.1538	0.5077	0.4923	0.5851	0.6354	0.5783	0	0.1667	0.6951	0.1279	0.3977	0.5824	0.5054	22
GNE	Candidate gene	0.25	0.2717	0.3333	0.6986	0.5851	0.5714	0.6806	0	0.2222	0.7895	0	0	0.5217	0	0.6	0	0.0882	0.625	0.2571	0.1143	0.0938	0.6146	0.3854	0.6354	0.5417	0.5521	0.5938	0.5729	0.6563	0.7872	0.3846	0.6154	0.9231	0.5851	0.6354	0.5783	0.5395	0.2604	0.061	0.686	0.2727	0.5824	0.5054	23
PPIC	Candidate gene	0.2604	0.4891	0.4792	0	0.5851	0.5714	0.6806	0.6923	0.6444	0.2211	0	0	0	0	0	0	0.6176	0	0	0	0.6354	0.3229	0.8021	0.6354	0.5417	0.5521	0.5938	0.5729	0.3438	0.5745	0.4615	0.8154	0.2462	0.5851	0.6354	0.1205	0.5132	0.6667	0.3171	0.186	0.6932	0.5824	0.5054	24
KIF1A	Candidate gene	0.2708	0.2717	0.2917	0.5753	0.5851	0.5714	0.1806	0.3077	0.2889	0.0526	0	0	0	0	0	0	0.6176	0.625	0.6571	0.9714	0.6354	0.4583	0.4583	0.6354	0.3646	0.5521	0.5938	0.5729	0.5417	0	0.6615	0.9385	0.8154	0.5851	0.6354	0.5783	0.3947	0.2188	0.1463	0.0349	0.25	0.5824	0.5054	25
RPS9	Candidate gene	0.2813	0.4891	0.4792	0.6164	0.5851	0.5714	0.6806	0	0	0.2632	0	0.7857	0	0.619	0.6	0.6774	0.6176	0	0	0	0.6354	0.3646	0.8021	0.125	0.4688	0.5521	0.5938	0.1146	0.3854	0	0	0	0	0.5851	0.0833	0	0	0.6667	0	0	0.0455	0.5824	0.5054	26
PITPNC1	Candidate gene	0.2917	0.4891	0.4792	0.7397	0.5851	0.5714	0	0	0	0.4737	0	0	0	0	0	0	0.6176	0	0	0	0.6354	0.3229	0.3438	0.6354	0.2604	0.5521	0.5938	0.5729	0.3021	0	0.1077	0.8615	0.6923	0.5851	0.6354	0.5783	0.5789	0.6667	0.6341	0.3256	0.2045	0.5824	0.5054	27
IL10RA	Candidate gene	0.3021	0.6413	0.1979	0.1781	0.5851	0.5714	0.6806	0	0.6444	0.0842	0	0	0.6087	0.619	0.6	0.6774	0.0882	0.625	0.9714	0.5143	0.6354	0.5729	0.8021	0.6354	0.6667	0.5521	0.5938	0.5729	0.6042	0.5319	0.8308	0.7231	0.3846	0.5851	0.6354	0.5783	0.6842	0.6667	0.2317	0.2442	0.5455	0.5824	0.5054	28
DDX11	Candidate gene	0.3125	0.6413	0.1979	0.8493	0.5851	0.5714	0.1806	0	0	0.2421	0.2	0	0	0	0	0	0	0.625	0.5143	0.8286	0.6354	0.6458	0.4688	0.6354	0.5833	0.5521	0.1146	0.5729	0.5417	0	0.5692	0.6923	0.5846	0.5851	0.6354	0.5783	0.6842	0.2396	0.8537	0.3837	0.5909	0.5824	0.5054	29
SVEP1	Candidate gene	0.3229	0.2717	0.4792	0.411	0.1383	0.5714	0.6806	0	0	0.3895	0	0	0	0	0	0	0.6176	0	0	0	0.6354	0.2917	0.25	0.6354	0.1667	0.5521	0.1042	0.5729	0.1875	0.9574	0.9692	0.2308	0.6615	0.5851	0.6354	0.5783	0.6184	0.6667	0.1707	0.4884	0.1364	0.5824	0.5054	30
RPS9	Candidate gene	0.3333	0.4891	0.4792	0.6164	0.5851	0.5714	0	0	0	0.2632	0	0.7857	0	0.619	0.6	0.6774	0.6176	0	0	0	0.6354	0.3646	0.8021	0.125	0.4688	0.5521	0.5938	0.1146	0.3854	0	0	0	0	0.5851	0.0833	0	0	0.6667	0	0	0.0455	0.5824	0	31
TPD52L1	Candidate gene	0.3438	0.4891	0.7813	0.6849	0.5851	0.5714	0.1806	0	0	0.0105	0.4	0	0	0	0.6	0	0.6176	0	0	0	0.6354	0.4583	0.4896	0.6354	0.6354	0.0833	0.5938	0.0625	0.4375	0.9149	0.7385	0.9231	0.2923	0.5851	0.2083	0.5783	0.5789	0.6667	0.3293	0.2791	0.4205	0.5824	0.5054	32
NDUFA10	Candidate gene	0.3542	0.7283	0.3125	0.3425	0.5851	0.5714	0.6806	0.6923	0.2222	0.4737	0.76	0.5357	0.3913	0	0.6	0.6774	0.6176	0.625	0	0.5143	0.6354	0.7917	0.1458	0.1771	0.4375	0.5521	0.5938	0.5729	0.8021	0	0.4308	0.2769	0.4	0.5851	0.1563	0.5783	0.1711	0.6667	0.3902	0.2442	0.9659	0.5824	0.5054	33
BACE1	Candidate gene	0.3646	0.4891	0.7813	0.6575	0.5851	0.5714	0.6806	0.6923	0.6444	0.1368	0	0.7857	0.4783	0.619	0.6	0.6774	0.6176	0	0.3714	0	0.1875	0.6146	0.5104	0.0938	0.7188	0.5521	0.5938	0.5729	0.7813	0	0.8154	0.8462	0.2769	0.5851	0.6354	0.5783	0.4211	0.6667	0	0.5349	0.3977	0.5824	0.5054	34
RPS9	Candidate gene	0.375	0.4891	0.4792	0.6164	0.5851	0.5714	0.6806	0	0.6444	0.2632	0.2	0.7857	0	0.619	0.6	0.6774	0.6176	0	0	0	0.1042	0.3646	0.1771	0.125	0.4688	0.5521	0.5938	0.1354	0.3854	0.3617	0.7077	0.7692	0.2	0.5851	0.0833	0.5783	0.1974	0.6667	0.8415	0.9651	0.0455	0.5824	0.5054	35
PITX1	Candidate gene	0.3854	0.1304	0.1979	0.4247	0.5851	0.5714	0	0	0.6444	0.3368	0	0	0	0	0	0	0.0882	0.625	0.1143	1	0.6354	0.6667	0.5833	0.6354	0.5729	0.5521	0.5938	0.5729	0.6667	0.7447	0.7538	0.9538	0.8923	0.0957	0.6354	0.0482	0.0263	0.6667	0.0366	0.1279	0.1591	0.5824	0.5054	36
D2HGDH	Candidate gene	0.3958	0.7717	0.0521	0	0.5851	0.5714	0.6806	0	0.6444	0.5474	0.76	0	0	0	0.6	0	0	0.625	0	0.5143	0.6354	0.2083	0.2917	0.6354	0.3438	0.5521	0.5938	0.5729	0.1875	0	0	0	0	0.5851	0.6354	0.5783	0.8289	0.1979	0.5	0.7907	0.4659	0.5824	0.5054	37
PPP1R7	Candidate gene	0.4063	0.2717	0.7813	0.9589	0.5851	0.5714	0	0	0	0.3053	0	0.5	0	0	0.6	0	0.6176	0	0	0	0.0729	0.3958	0.1875	0.2396	0.1354	0.0729	0.5938	0.5729	0.3646	0.617	0.7846	0.2923	0.9692	0.5851	0.0313	0.5783	0.0658	0.3229	0.439	0.2209	0.9091	0.1538	0.5054	38
DTYMK	Candidate gene	0.4167	0.1196	0.7813	0.9863	0.5851	0.5714	0.6806	0.3077	0.6444	0.2211	0.76	0	0.3043	0.619	0.6	0.6774	0	0	0	0.8286	0.6354	0.2917	0.3125	0.6354	0.5417	0.5521	0.5938	0.5729	0.2708	0.2553	0.6923	0.6	0.3077	0.5851	0.6354	0.5783	0.1053	0.6667	0.4268	0.593	0	0.5824	0.5054	39
PCSK7	Candidate gene	0.4271	0.2717	0.7813	0.7945	0.5851	0.5714	0.6806	0	0.1111	0.5684	0	0	0	0	0	0	0.6176	0	0	0	0.6354	0.2083	0.25	0.6354	0.875	0.5521	0.5938	0.5729	0.625	0.5106	0.6	0.8923	0.5692	0.1383	0.0625	0.5783	0.7763	0.6667	0.0244	0.0698	0.2614	0.5824	0.5054	40
HDLBP	Candidate gene	0.4375	0.2717	0.4792	0.2055	0.5851	0.5714	0.1806	0	0.6444	0.3895	0	0	0	0	0.6	0	0.6176	0	0	0	0.6354	0.5208	0.1667	0.2188	0.625	0.5521	0.5938	0.5729	0.5104	0.766	0.8769	0.5692	0.6	0.5851	0.25	0.1446	0.7237	0.6667	0.939	0.686	0.0795	0.5824	0.5054	41
NRIP1	Candidate gene	0.4479	0.6413	0.7813	0.3151	0.5851	0	0	0.6923	0.6444	0.3368	0	0.4286	0.6957	0.619	0.6	0.6774	0.6176	0	0.6857	0	0.6354	0.5625	0.5208	0.1563	0.6563	0.5521	0.5938	0.5729	0.5833	0.5532	0.3231	0.2	0.9385	0.5851	0.6354	0.5783	0.7763	0.6667	0	0.8721	0.1136	0.5824	0.5054	42
CXCL14	Candidate gene	0.4583	0.4891	0.7813	0.3699	0.5851	0.5714	0.6806	0	0	0.2	0	0.7857	0	0	0.6	0.6774	0.2206	0	0.4	0	0.1146	0.3229	0.8021	0.6354	0.875	0.5521	0.5938	0.5729	0.3021	0	0.8615	0.0923	0.4462	0.5851	0.6354	0.0482	0.4211	0.6667	0.6585	0.4419	0.4318	0.5824	0.5054	43
PRTFDC1	Candidate gene	0.4688	0.4891	0.7813	0.8082	0.5851	0.5714	0	0	0.6444	0.7895	0	0	0	0	0	0	0	0	0	0	0.6354	0.6458	0.5625	0.6354	0.6771	0.5521	0.5938	0.5729	0.6458	0	0	0	0	0.5851	0.6354	0.5783	0.4474	0.6667	0.4756	0.593	0.2841	0.5824	0.5054	44
HSD17B11	Candidate gene	0.4792	0.7283	0.3958	0.7534	0.5851	0.5714	0.6806	0.6923	0.6444	0.1579	0	0	0	0	0.6	0	0	0	0	0	0.6354	0.1146	0.8021	0.6354	0.5417	0.5521	0.5938	0.5729	0.1146	0	0.9077	0.6769	0.4769	0.5851	0.6354	0.5783	0.5789	0.6667	0	0.0698	0.6023	0.5824	0.5054	45
IFT88	Candidate gene	0.4896	0.2717	0.3646	0.3973	0.5851	0.5714	0.1806	0	0	0.3895	0	0.7857	0.6957	0.619	0.6	0.6774	0.6176	0	0.4286	0	0.2396	0.6667	0.8021	0.6354	0.7396	0.5521	0.5938	0.5729	0.7188	0.8511	0.5846	0.7385	0.8462	0.5851	0.6354	0.5783	0.8289	0.6667	0.3659	0.3837	0.2955	0.5824	0.5054	46
TSPAN9	Candidate gene	0.5	0.8913	0.7813	0.4384	0.5851	0.5714	0.6806	0	0	0.7895	0	0	0	0	0	0	0.6176	0	0	0	0.6354	0.1458	0.8021	0.6354	0.1667	0.5521	0.5938	0.5729	0.1458	0.383	0.3385	0.9077	0.2308	0.117	0.0104	0.5783	0.4868	0.6667	0.622	0.186	0.6591	0.5824	0.5054	47
FARP2	Candidate gene	0.5104	0.0761	0.7813	0.8219	0.5851	0.5714	0.1806	0	0.6444	0.7895	0.44	0.2857	0	0.619	0.6	0.2581	0.0882	0	0.7429	0	0.1771	0.5	0.25	0.6354	0.2604	0.5521	0.5938	0.0833	0.3438	0.3404	0.3538	0.8308	0.7385	0.5851	0.1563	0.5783	0.8289	0.2708	0.7439	0.3837	0.9318	0.5824	0.5054	48
CEP164	Candidate gene	0.5208	0.4891	0.2917	0.7808	0.5851	0.5714	0.1806	0	0.6444	0.5474	0.92	0	0	0.619	0.6	0.6774	0.6176	0.625	0	0	0.6354	0.5521	0.4375	0.25	0.3958	0.5521	0.5938	0.5729	0.5938	0.6383	0.4	1	0.5538	0.5851	0.6354	0.5783	0.6842	0.3125	0.7317	0.8023	0.3068	0.5824	0.5054	49
LYPLAL1	Candidate gene	0.5313	0.2717	0.4792	0	0.5851	0.5714	0.6806	0	0	0.7895	0	0	0	0	0	0	0.6176	0	0	0	0.6354	0.125	0.4375	0.6354	0.4375	0.5521	0.5938	0.5729	0.125	0	0	0	0	0.5851	0.6354	0.5783	0	0.6667	0.8049	0.2791	0.8636	0.044	0.5054	50
DCAF11	Candidate gene	0.5417	0.6413	0.7813	0.863	0.5851	0.5714	0.1806	0	0.6444	0.3368	0	0	0	0	0	0	0	0	0	0	0.6354	0.4167	0.5729	0.6354	0.6771	0.5521	0.5938	0.0625	0.3438	0.8936	0.2923	0.5538	0.6769	0.5851	0.2083	0.5783	0.6184	0.6667	0.7805	0.7209	0	0.5824	0.5054	51
MCPH1	Candidate gene	0.5521	0.2717	0.3646	0.4658	0.5851	0.5714	0.1806	0	0.6444	0.7895	0	0	0	0	0	0	0.1912	0.625	0.4857	0.9429	0.6354	0.6146	0.4688	0.6354	0.5417	0.5521	0.5938	0.5729	0.6146	0	0.0923	0.6615	0.8308	0.5851	0.6354	0.5783	0.2632	0.6667	0.1585	0.9419	0.9091	0.5824	0.5054	52
ABCA13	Candidate gene	0.5625	0.8913	0.7813	0	0.5851	0.5714	0.1806	0	0	0.4737	0	0	0	0	0.6	0	0.6176	0	0	0	0.6354	0.4583	0.3438	0.6354	0.875	0.5521	0.5938	0.5729	0.4375	0	0	0	0	0.5851	0.6354	0.5783	0	0.2292	0.6463	0.3023	0.7841	0.5824	0.5054	53
TBC1D23	Candidate gene	0.5729	0.8913	0.7813	0	0.5851	0.5714	0	0	0	0.7895	0	0	0	0	0	0	0	0	0.8	0	0.6354	0.2083	0.125	0.6354	0.3958	0.5521	0.5938	0.5729	0.1875	0	0	0	0	0.5851	0.6354	0.5783	0.4737	0.3021	0.2805	0.686	0.4545	0.5824	0.5054	54
PRMT8	Candidate gene	0.5833	0.4891	0.3229	0.5616	0.5851	0.5714	0.6806	0	0	0.7895	0	0	0	0	0	0	0.6176	0	0.8857	0	0.6354	0.8021	0.3438	0.6354	0.5833	0.5521	0.5938	0.5729	0.8125	0	0.4769	0.4154	0.6308	0.5851	0.6354	0.5783	0.9342	0.6667	0.5854	0.4302	0.4773	0.5824	0.5054	55
FDX1	Candidate gene	0.5938	0.7283	0.7813	0.3014	0.5851	0.5714	0.6806	0.6923	0.0667	0.1158	0.76	0	0.3043	0	0.6	0	0.6176	0	0	0.8286	0.6354	0.2083	0.8021	0.6354	0.4271	0.5521	0.5938	0.5729	0.4375	0.3191	0.9846	0.4	0.9077	0.5851	0.6354	0.5783	0.6842	0.6667	0.1341	0.6279	0.5682	0.044	0.5054	56
RNF214	Candidate gene	0.6042	0.8913	0.7813	0	0.5851	0	0.1806	0	0	0.7895	0	0	0	0	0	0	0.6176	0	0	0	0.6354	0.4583	0.25	0.6354	0.1667	0.5521	0.5938	0.5729	0.4375	0	0	0	0	0.5851	0.6354	0.5783	0.5132	0.6667	0.1098	0.8837	0.625	0.5824	0.5054	57
THAP4	Candidate gene	0.6146	0.8913	0.7813	0	0.5851	0.5714	0.1806	0	0.6444	0.4737	0	0	0	0	0	0	0.6176	0	0	0	0.6354	0.2083	0.8021	0.1458	0.875	0.5521	0.5938	0.5729	0.2708	0	0.1231	0.5846	0.7692	0.5851	0.1563	0.5783	0.25	0.6667	0.8293	0.8023	0.2273	0.5824	0.5054	58
MEFV	Candidate gene	0.625	0.1413	0.0625	0.5205	0.1702	0.1429	0.1806	0	0.6444	0.7895	0.56	0.7857	0.8696	0	0.6	0.6774	0.0882	0.625	0.4571	0.8286	0.6354	0.9063	0.5521	0.6354	0.5104	0.5521	0.5938	0.5729	0.2708	0	0	0	0	0.5851	0.6354	0.5783	0.9342	0.1563	0.2073	0.8256	0.8977	0.5824	0.5054	59
NRL	Candidate gene	0.6354	0.6413	0.1979	0.5068	0.5851	0.5714	0.1806	0	0	0.7895	0	0	0	0	0.6	0	0.6176	0.625	0.8857	0.8286	0.6354	0.9063	0.8021	0.6354	0.875	0.5521	0.5938	0.5729	0.9063	0.2766	0.1846	0.1538	0.7231	0.5851	0.6354	0.5783	0	0.6667	0.0488	0.6512	0.0909	0.5824	0.5054	60
KIAA1958	Candidate gene	0.6458	0	0.7813	0	0.5851	0.5714	0	0	0	0.7895	0	0	0	0	0	0	0.6176	0	0	0	0.6354	0.1458	0.8021	0.6354	0.875	0.5521	0.5938	0.5729	0.1875	0	0	0	0	0.5851	0.6354	0.5783	0.5132	0.6667	0.6829	0.7558	0.5	0.5824	0.5054	61
STX12	Candidate gene	0.6563	0.4891	0.7813	0.8767	0.5851	0.5714	0.1806	0	0	0.7895	0.92	0	0	0	0.6	0	0	0	0	0	0.6354	0.5	0.3854	0.6354	0.6354	0.5521	0.1563	0.0833	0.5208	0.4255	0.7692	0.3077	0.3538	0.5851	0.6354	0.5783	0	0.6667	0.9024	0.7209	0.1932	0.5824	0.5054	62
ZC3H12C	Candidate gene	0.6667	0.8913	0.7813	0.3288	0.5851	0.5714	0	0	0	0.7895	0	0	0	0	0	0	0.6176	0	0	0	0.6354	0.9063	0.4375	0.6354	0.875	0.5521	0.5938	0.5729	0.9063	0	0	0	0	0.5851	0.6354	0.5783	0.8289	0.6667	0.4146	0.0116	0.5795	0.5824	0.5054	63
TSEN34	Candidate gene	0.6771	0.8913	0.1979	0	0.5851	0.5714	0.6806	0	0	0.7895	0	0	0	0	0.6	0	0	0.625	0	0.5143	0.6354	0.7292	0.8021	0.6354	0.2604	0.5521	0.5938	0.5729	0.7188	0	0	0	0	0.5851	0.6354	0	0	0.6667	0	0	0.7841	0.5824	0.5054	64
TMPRSS13	Candidate gene	0.7396	0.8913	0.7813	0.8904	0.5851	0.5714	0.6806	0	0	0.4737	0	0	0	0	0.1	0	0.6176	0	0.8857	0	0.6354	0.2083	0.8021	0.6354	0.1667	0.5521	0.5938	0.5729	0.1875	0	0	0	0	0.5851	0.6354	0.5783	0	0.6667	0.2927	0.4884	0.875	0.5824	0.5054	70
IGFBP1	Candidate gene	0.7708	0.6413	0.7813	0.2877	0.5851	0.5714	0.6806	0	0.2	0.1053	0.2	0.1071	0.9565	0.619	0.0167	0.6774	0.0882	0	0.6	0.2857	0.1667	0.9063	0.3021	0.6354	0.7292	0.5521	0.5938	0.5729	0.9063	0.8723	1	0.3846	0.9538	0.1596	0.6354	0.5783	0.9342	0.6667	0.3415	0.186	0.1818	0.5824	0.5054	73
TBCK	Candidate gene	0.7917	0.8913	0.7813	0.7671	0.5851	0.5714	0.6806	0	0	0.7895	0	0	0	0	0	0	0.6176	0	0	0	0.6354	0.4583	0.8021	0.6354	0.875	0.5521	0.5938	0.5729	0.4375	0	0	0	0	0.5851	0.6354	0.5783	0.6842	0.6667	0.7073	0.686	0	0.5824	0.5054	75
SLC22A17	Candidate gene	0.8021	0.2717	0.7813	0.9178	0.1277	0.1209	0.6806	0	0	0.4737	0	0	0	0	0	0	0	0	0	0	0.6354	0.2083	0.8021	0.6354	0.2604	0.5521	0.5938	0.5729	0.1875	0	0.8	0.8769	0.4308	0.5851	0.6354	0.5783	0.3289	0.6667	0.7561	0.8837	0.3295	0.5824	0.5054	76
ANO7	Candidate gene	0.8125	0.2717	0.4792	0.7123	0.5851	0.5714	0.6806	0	0	0.7895	0.32	0	0	0	0.6	0	0	0	0	0	0.6354	0.9063	0.8021	0.6354	0.875	0.5521	0.5938	0.5729	0.9063	0	0	0	0	0.5851	0.6354	0.5783	0.3684	0.1771	0.4634	0.6512	0	0.5824	0.5054	77
MFSD8	Candidate gene	0.8229	0.2717	0.1979	0	0.1489	0.5714	0.6806	0	0	0.7895	0	0	0	0	0.6	0	0	0.625	0	0.5143	0.6354	0.9063	0.8021	0.6354	0.875	0.5521	0.5938	0.5729	0.9063	0	0	0	0	0.5851	0.6354	0.5783	0.4605	0.6667	0.3049	0.7558	0.8864	0.044	0.5054	78
NME8	Candidate gene	0.8333	0.2717	0.4792	0.4521	0.5851	0.5714	0	0	0	0.7895	0	0	0	0	0	0	0.6176	0.625	0	0.8286	0.1979	0.2083	0.8021	0.6354	0.875	0.5521	0.5938	0.5729	0.1875	0	0.5077	0.2615	0.7538	0.5851	0.6354	0.5783	0.9342	0.6667	0.5244	0.9186	0	0	0.5054	79
FGF20	Candidate gene	0.8438	0.6413	0.7813	0.3836	0.5851	0.5714	0	0	0.6444	0.4737	0.56	0.3571	0.6087	0	0.1833	0.6774	0.6176	0	0.8857	0	0.6354	0.9063	0.8021	0.6354	0.875	0.5521	0.5938	0.5729	0.9063	0	0.2	0.2154	0.9846	0.5851	0.6354	0.5783	0.8289	0.6667	0.378	0.2791	0.125	0.5824	0.5054	80
POU2AF1	Candidate gene	0.8542	0.8913	0.7813	0.2192	0.5851	0.5714	0.6806	0	0	0.7895	0	0	0	0	0	0	0.6176	0	0.6857	0	0.6354	0.9063	0.5938	0.6354	0.875	0.5521	0.5938	0.0417	0.9063	0.4681	0.9385	0.1077	0.5077	0.5851	0.6354	0.5783	0	0.6667	0.2561	0.907	0.6477	0.5824	0.5054	81
ARHGAP20	Candidate gene	0.8646	0.2717	0.7813	0.4932	0.5851	0.5714	0.6806	0	0	0.7895	0.92	0	0	0	0.6	0.6774	0.6176	0	0	0	0.6354	0.9063	0.8021	0.0938	0.875	0.5521	0.5938	0.5729	0.9063	0	0	0	0	0.5851	0.6354	0.5783	0.75	0.6667	0.7927	0.3837	0.4886	0.5824	0.5054	82
SIDT2	Candidate gene	0.875	0.2717	0.7813	0.0548	0.5851	0.5714	0.6806	0	0	0.4737	0	0	0	0	0	0	0.6176	0	0	0	0.6354	0.9063	0.8021	0.6354	0.875	0.5521	0.5938	0.5729	0.9063	0	0.8462	0.6462	0.6154	0.5851	0.6354	0.5783	0.0658	0.6667	0.9756	0.593	0.2386	0.5824	0.5054	83
INIP	Candidate gene	0.8854	0.7609	0.7813	0.9315	0	0	0	0	0	0.7895	0	0	0	0	0	0	0	0	0	0	0.6354	0.4583	0.8021	0.6354	0.1667	0.5521	0.5938	0.5729	0.4375	0	0	0	0	0	0.6354	0.5783	0	0.6667	0.5366	0.593	0	0	0.5054	84
ARMC12	Candidate gene	0.8958	0	0.7813	0	0.5851	0.5714	0	0	0	0.7895	0	0	0	0	0	0	0.6176	0	0	0	0.6354	0.9063	0.3438	0.6354	0.875	0.5521	0.5938	0.5729	0.9063	0	0	0	0	0.5851	0.6354	0.5783	0.3684	0.6667	0.7195	0.7558	0	0	0.5054	85
SLC26A8	Candidate gene	0.9063	0.6413	0.7813	0	0.5851	0.5714	0.6806	0	0	0.7895	0	0	0	0	0.6	0	0.6176	0	0.8857	0	0.6354	0.9063	0.8021	0.6354	0.875	0.5521	0.5938	0.5729	0.9063	0	0	0	0	0.5851	0.6354	0.5783	0.9342	0.6667	0.2439	0.8256	0.6705	0.5824	0.5054	86
RAB31	Candidate gene	0.9167	0.2717	0.7813	0.6712	0.5851	0.5714	0	0	0.6444	0.4211	0	0	1	0	0	0	0.6176	0	0	0	0.0833	0.6354	0.25	0.6354	0.375	0.5521	0.5938	0.5729	0.6354	0.9362	0.6462	0.4769	0.8	0.5851	0.6354	0.5783	0.3289	0.6667	0.8659	0.9884	0.9886	0.1099	0.5054	87
ITFG2	Candidate gene	0.9271	0	0.7813	0	0.5851	0.5714	0.6806	0	0	0.7895	0	0	0	0	0	0	0	0	0	0	0.6354	0.9063	0.8021	0.6354	0.875	0.5521	0.5938	0.5729	0.9063	0.6809	0.3077	0.9692	0.4615	0.5851	0.6354	0.5783	0.5789	0.2917	0.7683	0.3837	0.7045	0.5824	0.5054	88
NRIP2	Candidate gene	0.9375	0.2717	0.7813	0.9452	0.5851	0.5714	0.6806	0	0	0.7895	0	0	0	0	0	0	0.6176	0	0	0	0.6354	0.9063	0.8021	0.6354	0.875	0.5521	0.5938	0.5729	0.9063	0	0.5385	0.0615	0.5385	0.5851	0.6354	0.5783	0.5395	0.6667	0.9268	0.7558	0.9432	0.5824	0.5054	89
C11orf53	Candidate gene	0.9479	0	0.7813	0	0	0	0.6806	0	0	0	0	0	0	0	0	0	0.6176	0	0	0	0.6354	0.2083	0.25	0.6354	0.875	0.5521	0.5938	0.5729	0.1875	0	0	0	0	0.5851	0.6354	0	0.9342	0.6667	0.9512	0.8605	0.3636	0.5824	0.5054	90
GPR35	Candidate gene	0.9583	0.8913	0.7813	0.9041	0.5851	0.5714	0.6806	0	0.6444	0.7895	0	0.7857	0	0	0.6	0.6774	0.0882	0	0	0	0.6354	0.9063	0.8021	0.6354	0.875	0.5521	0.5938	0.5729	0.9063	0.9787	0.2462	0.5385	0.8615	0.5851	0.6354	0.5783	0.9342	0.6667	0.6707	0.0698	0.8523	0.5824	0.5054	91
MEIOB	Candidate gene	0.9688	0.2717	0.4792	0	0.5851	0	0	0	0	0.7895	0	0	0	0	0	0	0	0	0	0	0.6354	0.9063	0.8021	0.6354	0.875	0.5521	0.5938	0.5729	0.9063	0	0	0	0	0	0.6354	0	0.9342	0.6667	0.878	0.9419	0	0	0.5054	92
ZNF200	Candidate gene	0.9792	0.8913	0.7813	0.9726	0.5851	0.5714	0	0	0	0.7895	0.92	0	0	0	0	0	0	0	0	0	0.6354	0.2917	0.3438	0.6354	0.375	0.5521	0.5938	0.0625	0.2708	1	0.2154	0.4615	0.7846	0.5851	0.2083	0.5783	0	0.6667	1	0.9884	0.7273	0.1099	0.5054	93
GAL3ST2	Candidate gene	0.9896	0.2717	0.7813	1	0.5851	0.5714	0.6806	0	0.6444	0.7895	0	0.7857	0	0	0.6	0	0	0	0	0	0.6354	0.9063	0.8021	0.6354	0.875	0.5521	0.5938	0.5729	0.9063	0	0	0	0	0.5851	0.6354	0.5783	0.9342	0.6667	0.8902	0.0698	0.9659	0	0.5054	94
IL9	Candidate gene	1	0.6413	0.7813	0.2329	0.5851	0.5714	0.6806	0	0.6444	0.7895	0	0.7857	0.6087	0	0.6	0.6774	0.6176	0	0.9714	0.8286	0.6354	0.9063	0.8021	0.6354	0.875	0.5521	0.5938	0.5729	0.9063	0.7234	0.1385	0.1231	1	0.0638	0.6354	0.5783	0.9342	0.6667	0.9878	0.4419	1	0.5824	0.5054	95

## Sheet: WesternPleasure_Skeletal_Muscle
Gene name	Group	P-value	Annotation â€“ Gene Ontology	Annotation â€“ UniProt	Text-mining	Annotation â€“ InterPro	Annotation â€“ Pfam	Annotation â€“ SIMAP (localization)	Annotation â€“ DrugBank	Annotation â€“ Stitch	Annotation â€“ RGD ChEBI	Annotation â€“ Reactome	Annotation â€“ WikiPathways	Annotation â€“ RGD pathways	Annotation â€“ BioCarta	Annotation â€“ CPDB	Annotation â€“ hiPathDB	Annotation â€“ GAD	Annotation â€“ OMIM	Annotation â€“ RGD MP	Annotation â€“ RGD RDO	Interaction â€“ String	Interaction â€“ BioGrid	Interaction â€“ I2D	Interaction â€“ IntAct	Interaction â€“ iRefIndex	Interaction â€“ Mint	Interaction â€“ HPRD	Interaction â€“ MIPS	Interaction â€“ GeneRIF	Expression â€“ Su et al (2002)	Expression â€“ Su et al (2004)	Expression â€“ CMAP	Expression â€“ Lukk et al	Annotation â€“ PaGenBase	Annotation â€“ CGAP	Annotation â€“ GNF	Annotation â€“ eGenetics	Blast	Precalculated â€“ Ouzounis	Precalculated â€“ Prospectr	Precalculated â€“ HaploPred	Annotation â€“ Aura	Annotation â€“ mirZ	id
ACTA1	Training gene	0.01	0.01	0.01	0.0735	0.0313	0.043	0	0.1	0	0.05	0	0.0556	0	0.0455	0.1277	0.3103	0.0923	0.0455	0.0488	0.0385	0.05	0.05	0.05	0.04	0.05	0.03	0.04	0.55	0.05	0.0488	0.0159	0.2063	0.0159	0.01	0.1717	0.0256	0	0.05	0.0676	0.6047	0.0313	0.5729	0.5	0
GYS1	Training gene	0.02	0.72	0.06	0.0882	0.0625	0.0645	0	0	0.2564	0.09	0.0294	0.2778	0.087	0.0909	0.0426	0.0345	0.0308	0.2727	0.122	0.5385	0.13	0.05	0.05	0.04	0.05	0.03	0.04	0.55	0.05	0.0732	0.0635	0.2381	0.0794	0.04	0.0808	0.1154	0.0533	0.05	0.0811	0.2209	0.3021	0.1458	0.5	1
RYR1	Training gene	0.03	0.03	0.18	0.1176	0.0521	0.0323	0.1846	0.2	0.0256	0.38	0.2353	0.1667	0.1739	0	0.0213	0.2759	0.0154	0.0909	0.0976	0.1154	0.07	0.05	0.05	0.04	0.05	0.03	0.04	0.55	0.05	0.1463	0.0317	0.1429	0.0476	0.07	0.202	0.0641	0.1733	0.05	0	0.0349	0.4375	0.5729	0.5	2
ACTB	Training gene	0.04	0.02	0.04	0.1324	0.0313	0.043	0	0	0	0.07	0.1765	0.1111	0.2174	0.2273	0.0851	0.1724	0.5846	0.1818	0.0244	0.3077	0.02	0.05	0.05	0.04	0.05	0.03	0.04	0.01	0.05	0.122	0.4286	0.4603	0.1429	0.15	0.0404	0.1154	0.4133	0.05	0.0541	0.5233	0.0104	0.1146	0.5	3
SLC2A4	Training gene	0.05	0.08	0.09	0.1471	0.0833	0.1183	0.1846	0	0.0513	0.1	0.0588	0.2222	0.0435	0.1364	0.0638	0.069	0.1538	0.3182	0.0732	0.3462	0.13	0.05	0.05	0.04	0.05	0.03	0.04	0.55	0.05	0.0976	0.3492	0.0635	0.1111	0.04	0.1212	0.6026	0.08	0.05	0.1351	0.5233	0.3438	0.5729	0.5	4
MYH1	Training gene	0.06	0.06	0.07	0.0588	0.1042	0.0753	0.1846	0	0	0.02	0	0	0.1304	0	0.1489	0.1034	0.1385	0	0.1951	0	0.02	0.05	0.05	0.04	0.05	0.59	0.04	0.55	0.05	0	0.0476	0.0159	0.0317	0.03	0.202	0.1538	0.1467	0.05	0.4865	0.6512	0.0729	0.5729	0.5	5
MICAL1	Training gene	0.07	0.04	0.02	0.0147	0.0104	0.0108	0.1846	0	0	0.26	0	0	0	0	0	0	0	0	0	0	0.24	0.05	0.05	0.62	0.05	0.03	0.04	0.01	0.05	0	0.5873	0.6032	0.1746	0.58	0.6061	0.6026	0.2533	0.05	0.9054	0.5233	0.9271	0.0521	0.5	6
MSTN	Training gene	0.08	0.07	0.73	0.1618	0.0729	0.0968	0.6923	0	0.2308	0.03	0	0.3889	0	0	0.234	0	0.1077	0.2273	0.1463	0.5	0.13	0.05	0.05	0.62	0.05	0.59	0.04	0.55	0.05	0.1707	0.254	0.0476	0.0952	0.02	0.6061	0.6026	0.0133	0.05	0.1757	0.593	0.0417	0.5729	0.5	7
MICAL2	Training gene	0.09	0.04	0.02	0.0294	0.0208	0.0215	0	0	0	0.11	0	0	0	0	0	0	0.5846	0	0	0	0.24	0.05	0.05	0.62	0.05	0.59	0.65	0.55	0.05	0.1951	0.4921	0.4921	0.2063	0.58	0.0101	0.6026	0.2933	0.05	0.6216	0.1163	0.2917	0.0521	0.5	8
SEPN1	Training gene	0.1	0.48	0.15	0.1029	0.1354	0.5591	0.6923	0	0.2821	0.44	0	0	0	0	0.617	0	0	0.1364	0.1707	0.0769	0.05	0.05	0.05	0.04	0.05	0.59	0.65	0.55	0.05	0	0	0	0	0.58	0.1212	0	0.12	0.05	0.1622	0.407	0.625	0.0521	0.5	9
MYO6	Candidate gene	0.11	0.11	0.08	0.2353	0.1146	0.1075	0.1846	0	0	0.78	0.2941	0	0.6957	0.6364	0.617	0.6897	0.5846	0.6818	0.2927	0.2692	0.01	0.44	0.24	0.2	0.29	0.59	0.12	0.55	0.3	0.439	0.6032	0.6508	0.5079	0.58	0.6061	0.6026	0	0.11	0	0.1512	0.4063	0.5729	0.5	10
PARD3	Candidate gene	0.12	0.12	0.21	0.25	0.5729	0.5591	0.1846	0	0	0.39	0.7353	0	0.5217	0.6364	0.1915	0.1379	0.5846	0	0.4146	0	0.63	0.73	0.52	0.24	0.58	0.16	0.26	0.55	0.72	0.7073	0.1746	0.7778	0.381	0.08	0.6061	0.0641	0.2267	0.68	0.1216	0.6977	0.1771	0.5729	0.5	11
CDH5	Candidate gene	0.13	0.61	0.73	0.4412	0.5729	0.5591	0.6923	0.7	0.1282	0.11	0.7353	0	0.5217	0.6364	0.617	0.2414	0	0	0.3659	0.2308	0.15	0.55	0.46	0.11	0.48	0.15	0.22	0.05	0.5	0.6829	0.9841	0.127	0.1905	0.12	0.6061	0.1154	0.5733	0.68	0.4054	0.0814	0.1875	0.5729	0.5	12
KIF5B	Candidate gene	0.14	0.09	0.21	0.6618	0.5729	0.5591	0.1846	0.7	0.6667	0.36	0.1176	0.3333	0.6957	0.6364	0.1702	0.6897	0.5846	0	0.4634	0	0.63	0.7	0.27	0.19	0.43	0.13	0.65	0.55	0.73	0.5122	0.5397	0.3333	0.7778	0.58	0.6061	0.6026	0.7867	0.68	0.2297	0.1512	0.1563	0.0521	0.5	13
AARS	Candidate gene	0.15	0.27	0.16	0.6176	0.5729	0.5591	0.1846	0.7	0.6667	0.5	0.7353	0	0	0.6364	0.617	0.6897	0	0.6818	0.8537	0.1923	0.63	0.56	0.22	0.14	0.54	0.11	0.65	0.55	0.51	0.6098	0.5556	0.6825	0.6984	0.58	0.0202	0.6026	0.2933	0.68	0.4459	0.4651	0.3125	0.5729	0.5	14
COX7A1	Training gene	0.16	0.68	0.73	0.0441	0.0938	0.086	0.6923	0.3	0.6667	0.14	0	0.5556	0.4348	0	0.617	0	0.5846	0	0.2195	0	0.63	0.88	0.79	0.62	0.89	0.59	0.65	0.55	0.9	0.0244	0.0952	0.0317	0.0635	0.06	0.0707	0.0128	0.16	0.12	0.9324	0.8953	0.7917	0.5729	0.5	15
FAS	Candidate gene	0.17	0.7	0.12	0.2059	0.5729	0.5591	0.6923	0	0.1282	0.08	0.7353	0.5	0.6087	0.1818	0.1064	0.3448	0.1231	0.6818	0.3415	0.5769	0.63	0.48	0.29	0.2	0.38	0.59	0.15	0.55	0.48	0.4634	0.4762	0.9048	0.619	0.58	0.1212	0.6026	0.6533	0.68	0.0405	0.6628	0.8021	0.5729	0.5	16
SORL1	Candidate gene	0.18	0.87	0.73	0.5147	0.5729	0.5591	0.6923	0	0.6667	0.26	0	0	0	0	0	0	0.0615	0.6818	0.2439	0.8077	0.1	0.34	0.37	0.62	0.34	0.59	0.65	0.55	0.35	0.2439	0.6984	0.5238	0.3651	0.58	0.6061	0.6026	0.7067	0.68	0.1486	0.0116	0.0521	0.5729	0.5	17
ZFHX3	Candidate gene	0.19	0.13	0.73	0.6029	0.5729	0.5591	0.1846	0	0.6667	0.16	0	0	0	0.6364	0.617	0.6897	0.5846	0.6818	0.5122	0.9615	0.63	0.34	0.13	0.62	0.55	0.59	0.65	0.55	0.43	0	0	0	0	0.58	0.6061	0.6026	0.6933	0.35	0.2162	0.0349	0.0625	0.5729	0.5	18
GLG1	Candidate gene	0.2	0.48	0.73	0.4853	0.5729	0.5591	0.6923	0	0	0.4	0	0	0	0	0.617	0.6897	0.5846	0	0.5366	0	0.63	0.23	0.18	0.62	0.48	0.59	0.65	0.55	0.22	0.3659	0.5079	0.5873	0.9048	0.12	0.1212	0.6026	0.2933	0.68	0.2973	0.5814	0.5313	0.5729	0.5	19
PIP4K2A	Candidate gene	0.21	0.27	0.35	0.3382	0.5729	0.5591	0	0	0.3077	0.03	0.4118	0.4444	0.6522	0.6364	0.617	0.2069	0.5846	0	0	0	0.63	0.23	0.37	0.62	0.32	0.59	0.16	0.55	0.13	0.7317	0.8571	0.6349	0.2381	0.58	0.6061	0.6026	0.76	0.68	0.7027	0.3372	0.7604	0.5729	0.5	20
DDX19A	Candidate gene	0.22	0.27	0.35	0	0.5729	0.5591	0	0	0	0.78	0	0	0	0	0	0	0	0	0	0	0.63	0.68	0.28	0.62	0.4	0.59	0.65	0.55	0.68	0.7561	0.4127	0.3175	0.3968	0.08	0.1212	0.6026	0.0933	0.15	0.3378	0.1512	0.375	0.0521	0.5	21
SLC17A5	Candidate gene	0.23	0.27	0.12	0.3529	0.125	0.5591	0.6923	0	0.1026	0.26	0.3529	0	0	0.6364	0.617	0.6897	0.5846	0.6818	0.439	0.8077	0.63	0.13	0.79	0.62	0.24	0.59	0.65	0.55	0.12	0	0.1429	0.8889	0.6825	0.58	0.6061	0.6026	0.9067	0.68	0.1081	0.1163	0.5208	0.1354	0.5	22
GLE1	Candidate gene	0.24	0.27	0.16	0.5588	0.5729	0.5591	0.1846	0	0.6667	0.41	0	0	0	0	0	0	0.5846	0.6818	0.7317	0.1538	0.08	0.44	0.79	0.62	0.48	0.59	0.65	0.55	0.45	0.4146	0.2222	0.9206	0.2698	0.16	0.6061	0.6026	0.5733	0.68	0	0.407	0.2813	0.5729	0.5	23
PGLS	Candidate gene	0.25	0.68	0.35	0	0.5729	0.5591	0.6923	0	0.3077	0.78	0.0882	0.7778	0.4783	0.6364	0.617	0.6897	0	0	0	0	0.63	0.44	0.29	0.62	0.48	0.59	0.65	0.55	0.45	0	0.8889	0.5556	0.1587	0.58	0.6061	0.1795	0.6533	0.68	0.3784	0.6279	0.2396	0.5729	0.5	24
EPS8L1	Candidate gene	0.26	0.27	0.35	0	0.5729	0.5591	0.1846	0	0	0.26	0	0	0	0	0	0	0	0	0	0	0.63	0.62	0.42	0.62	0.63	0.59	0.65	0.55	0.61	0	0.6508	0.8095	0.7143	0.58	0.6061	0.1538	0.3467	0.21	0.2568	0.6744	0.6979	0.5729	0.5	25
NOC3L	Candidate gene	0.27	0.87	0.73	0.4559	0.5729	0.5591	0.1846	0	0	0.06	0	0	0	0	0	0	0.5846	0	0	0	0.63	0.4	0.23	0.14	0.36	0.59	0.65	0.55	0.37	0	0.7302	0.381	0.6032	0.58	0.6061	0.6026	0	0.68	0.5541	0.407	0.3229	0.5729	0.5	26
CCNY	Candidate gene	0.28	0.48	0.73	0	0.5729	0.5591	0.6923	0	0	0.78	0	0	0	0	0	0	0.5846	0	0	0	0.19	0.23	0.18	0.62	0.24	0.59	0.65	0.55	0.32	0	0	0	0	0.58	0.6061	0.6026	0.2933	0.68	0.6351	0.2442	0.4583	0.5729	0.5	27
TPD52L1	Candidate gene	0.29	0.48	0.73	0.7353	0.5729	0.5591	0.1846	0	0	0.01	0.2941	0	0	0	0.617	0	0.5846	0	0	0	0.63	0.44	0.49	0.62	0.52	0.14	0.65	0.03	0.45	0.9512	0.746	0.9524	0.3175	0.58	0.1717	0.6026	0.6533	0.68	0.3919	0.3023	0.3542	0.5729	0.5	28
KIAA1191	Candidate gene	0.3	0.68	0.25	0.6765	0.5729	0.5591	0	0	0	0.78	0	0	0	0	0	0	0.5846	0	0	0	0.63	0.33	0.53	0.62	0.37	0.08	0.65	0.55	0.31	0	0	0	0	0.58	0.1212	0	0.1867	0.33	0.5946	0.7209	0.3646	0.5729	0.5	29
KIAA1217	Candidate gene	0.31	0.27	0.35	0.5735	0.5729	0.5591	0.1846	0	0	0.36	0	0	0	0	0	0	0.5846	0	0.8049	0	0.63	0.52	0.48	0.62	0.44	0.59	0.65	0.55	0.53	0	0	0	0	0.58	0.6061	0.6026	0.5733	0.68	0.8784	0.407	0.4375	0.5729	0.5	30
TBCEL	Candidate gene	0.32	0.27	0.21	0	0.5729	0.5591	0.1846	0	0	0.55	0	0	0	0	0	0	0.5846	0	0	0	0.63	0.23	0.79	0.62	0.16	0.59	0.65	0.55	0.22	0	0.381	0.9365	0.2222	0.58	0.6061	0.6026	0.5333	0.68	0.6622	0.407	0.2188	0.5729	0.5	31
CLNS1A	Candidate gene	0.33	0.48	0.21	0.75	0.5729	0.5591	0	0	0.6667	0.5	0.7353	0	0	0.6364	0.617	0.6897	0.5846	0	0.7317	0	0.04	0.39	0.26	0.16	0.28	0.59	0.11	0.08	0.39	0.2195	0.9524	0.4444	0.4762	0.58	0.6061	0.6026	0.2133	0.68	0.5135	0.6279	0.8125	0.5729	0.5	32
NTM	Candidate gene	0.34	0.61	0.73	0.1765	0.5729	0.5591	0.6923	0	0.6667	0.13	0	0	0	0	0	0	0.5846	0	0	0	0.18	0.52	0.37	0.62	0.89	0.59	0.65	0.55	0.53	0	0.7143	0.2698	0.3333	0.58	0.6061	0.6026	0	0.68	0.0946	0.1977	0	0.5729	0.5	33
HDDC2	Candidate gene	0.35	0.48	0.73	0.6324	0.5729	0.5591	0.6923	0	0.6667	0.26	0	0	0	0	0	0	0.5846	0	0	0	0.63	0.23	0.13	0.62	0.2	0.59	0.65	0.55	0.22	0.561	0.2063	0.4762	0.7619	0.58	0.1212	0.6026	0.7333	0.68	0.5676	0.6279	0.8854	0.5729	0.5	34
GRIK2	Candidate gene	0.36	0.61	0.73	0.3088	0.5729	0.5591	0.6923	0.7	0.6667	0.41	0.7353	0	0.8261	0	0.617	0.6897	0.5846	0.6818	0.6341	0.4615	0.63	0.88	0.37	0.62	0.51	0.59	0.18	0.55	0.69	0.2927	0.3016	0.1746	0.4921	0.58	0.6061	0.6026	0.9067	0.68	0.5	0.5581	0.1979	0.5729	0.5	35
LENG8	Candidate gene	0.37	0.61	0.73	0	0.5729	0.5591	0	0	0	0.5	0	0	0	0	0	0	0	0	0	0	0.63	0.37	0.51	0.62	0.32	0.1	0.65	0.55	0.35	0	0	0	0	0.58	0.6061	0	0.2933	0.27	0.6081	0.814	0.5729	0.0521	0.5	36
PPIC	Candidate gene	0.38	0.48	0.35	0	0.5729	0.5591	0.6923	0.7	0.6667	0.26	0	0	0	0	0	0	0.5846	0	0	0	0.63	0.37	0.79	0.62	0.44	0.59	0.65	0.55	0.4	0.5854	0.4444	0.873	0.2857	0.58	0.6061	0.1795	0.5733	0.68	0.3514	0.1744	0.75	0.5729	0.5	37
DDX19B	Candidate gene	0.39	0.27	0.35	0.8529	0.5729	0.5591	0.6923	0	0.6667	0.78	0	0	0	0	0	0	0	0	0	0	0.63	0.44	0.32	0.23	0.7	0.59	0.65	0.55	0.66	0	0	0	0	0.58	0.6061	0	0.04	0.16	0.2703	0.3372	0.4271	0.0521	0.5	38
UBASH3B	Candidate gene	0.4	0.27	0.35	0.5	0.5729	0.5591	0.6923	0	0.0769	0.78	0	0	0	0	0	0	0.5846	0	0	0	0.23	0.49	0.31	0.22	0.3	0.59	0.65	0.55	0.47	0	0	0	0	0.58	0.6061	0.6026	0.5733	0.68	0.973	0.407	0.5938	0.5729	0.5	39
GRM7	Candidate gene	0.41	0.48	0.73	0.2206	0.5729	0.5591	0.6923	0.7	0.1795	0.5	0.7353	0.7778	0.8261	0	0.2128	0.6897	0.5846	0	0.6585	0	0.63	0.62	0.24	0.62	0.35	0.59	0.24	0.55	0.42	0.8049	0.0794	0.4127	0.4444	0.58	0.6061	0.6026	0.9067	0.68	0	0.5581	0.1042	0.5729	0.5	40
HYDIN	Candidate gene	0.42	0.87	0.73	0.5441	0.5729	0.5591	0.1846	0	0	0.78	0	0	0	0	0	0	0.5846	0.6818	0	0.8077	0.63	0.23	0.79	0.62	0.16	0.59	0.65	0.55	0.22	0	0.3968	0.0794	0.7937	0.58	0.6061	0.6026	0.0133	0.14	0.7297	0.5233	0	0.5729	0.5	41
SNX24	Candidate gene	0.43	0.27	0.73	0	0.5729	0.5591	0.6923	0	0	0.44	0	0	0	0	0	0	0.5846	0	0	0	0.63	0.23	0.37	0.62	0.24	0.11	0.65	0.55	0.32	0	0.873	0.6667	0.5873	0.58	0.6061	0.6026	0.2267	0.68	0.2838	0.8023	0.4792	0.5729	0.5	42
MTO1	Candidate gene	0.44	0.71	0.05	0.5882	0.5729	0.5591	0.6923	0	0.6667	0.78	0	0	0	0	0	0	0.5846	0.6818	0	0	0.16	0.23	0.12	0.62	0.72	0.59	0.65	0.55	0.22	0	0.7619	0.2857	0.6508	0.58	0.6061	0.6026	0	0.29	0.2027	0.2209	0.9375	0.5729	0.5	43
RPS5	Candidate gene	0.45	0.27	0.73	1	0.5729	0.5591	0	0	0.6667	0.78	0.1176	0.7778	0	0.6364	0.617	0.6897	0	0	0	0	0.17	0.57	0.11	0.09	0.71	0.59	0.65	0.55	0.56	0.3171	0.8095	0.4286	0.4603	0.58	0.202	0.1154	0.1333	0.36	0.527	0.8605	0.0208	0.125	0.5	44
LENG8	Candidate gene	0.46	0.61	0.73	0	0.5729	0.5591	0	0	0	0.5	0	0	0	0	0	0	0	0	0	0	0.63	0.37	0.79	0.62	0.32	0.59	0.65	0.55	0.35	0	0	0	0	0.58	0.6061	0	0	0.27	0	0	0.5729	0.0521	0.5	45
EPS8L1	Candidate gene	0.47	0.27	0.35	0	0.5729	0.5591	0	0	0	0.26	0	0	0	0	0	0	0	0	0	0	0.63	0.62	0.79	0.62	0.63	0.59	0.65	0.55	0.61	0	0	0	0	0.58	0.6061	0	0	0.21	0	0	0.6979	0.5729	0.5	46
U2AF2	Candidate gene	0.48	0.61	0.73	0.7794	0.5729	0.5591	0.1846	0	0.6667	0.78	0.7353	0.7778	0.9565	0.6364	0.617	0.6897	0	0	0	0	0.63	0.72	0.43	0.18	0.69	0.59	0.25	0.09	0.71	0.8293	0.2698	0.5397	0.127	0.58	0.6061	0.6026	0.6533	0.68	0.4189	0.686	0.2083	0.0521	0.5	47
CFDP1	Candidate gene	0.49	0.87	0.73	0.7059	0.5729	0.5591	0	0	0	0.5	0	0	0	0	0	0	0.5846	0	0	0	0.63	0.14	0.18	0.62	0.12	0.08	0.09	0.55	0.13	0.3415	0.9206	0.5079	0.6667	0.58	0.6061	0.6026	0.7333	0.68	0	0.7558	0.0938	0.5729	0.5	48
SLC27A1	Candidate gene	0.5	0.55	0.35	0	0.5729	0.5591	0.6923	0	0.2051	0.26	0.4706	0	0	0	0.617	0.6897	0.5846	0	0.2683	0.4231	0.22	0.88	0.37	0.62	0.89	0.59	0.65	0.55	0.9	0	0	0	0	0.58	0.0303	0.6026	0.48	0.68	0.1892	0.0814	0.875	0.5729	0.5	49
EPS8L1	Candidate gene	0.51	0.27	0.35	0	0.5729	0.5591	0	0	0	0.26	0	0	0	0	0	0	0	0	0	0	0.63	0.62	0.79	0.62	0.63	0.59	0.65	0.55	0.61	0	0	0	0	0.58	0.6061	0	0	0.21	0	0	0.6979	0.5729	0	50
EPS8L1	Candidate gene	0.52	0.27	0.35	0	0.5729	0.5591	0	0	0	0.26	0	0	0	0	0	0	0	0	0	0	0.63	0.62	0.79	0.62	0.63	0.59	0.65	0.55	0.61	0	0	0	0	0.58	0.6061	0	0	0.21	0	0	0.6979	0.5729	0	51
OPCML	Candidate gene	0.58	0.87	0.12	0.1912	0.5729	0.5591	0.6923	0	0	0.54	0	0	0	0	0	0	0.5846	0.6818	0	0	0.63	0.88	0.55	0.62	0.74	0.59	0.65	0.55	0.9	0.3902	0.1905	0.3016	0.4286	0.58	0.6061	0	0.44	0.68	0.5405	0.2791	0.1667	0.5729	0.5	57
STX12	Candidate gene	0.59	0.48	0.73	0.8824	0.5729	0.5591	0.1846	0	0	0.78	0.7353	0	0	0	0.617	0	0	0	0	0	0.63	0.52	0.44	0.62	0.52	0.59	0.2	0.04	0.49	0.4878	0.7778	0.3492	0.3492	0.58	0.6061	0.6026	0	0.68	0.8919	0.7209	0.1458	0.5729	0.5	58
JAKMIP1	Candidate gene	0.6	0.09	0.21	0	0.5729	0	0.1846	0	0	0.78	0	0.7778	0	0	0.617	0	0.5846	0	0	0	0.63	0.11	0.57	0.62	0.89	0.59	0.65	0.55	0.9	0	0	0	0	0.12	0.6061	0.6026	0.48	0.68	0.7703	0.1163	0.1354	0.5729	0.5	59
VAC14	Candidate gene	0.61	0.27	0.73	0.6471	0.5729	0.5591	0.1846	0	0.6667	0.78	0.4118	0	0	0	0.617	0	0.5846	0	0.3902	0	0.09	0.74	0.15	0.08	0.73	0.59	0.65	0.55	0.75	0	0.3175	0.9683	0.8889	0.58	0.6061	0.6026	0.36	0.68	0.473	0.407	0.4792	0.5729	0.5	60
SF3B3	Candidate gene	0.62	0.87	0.73	0.2647	0.5729	0.5591	0.6923	0	0	0.78	0.7353	0.7778	0.9565	0	0.617	0.6897	0.5846	0	0	0	0.63	0.69	0.21	0.12	0.57	0.17	0.19	0.07	0.67	0	0.9365	0.3968	0.4127	0.58	0.0505	0.6026	0.3733	0.68	0	0.4651	0.0833	0.0521	0.5	61
UNC79	Candidate gene	0.63	0.73	0.73	0.3824	0.5729	0.5591	0	0	0	0.78	0.2353	0	0	0	0.617	0	0.5846	0	0.3171	0	0.63	0.23	0.37	0.62	0.24	0.59	0.65	0.55	0.22	0	0	0	0	0.58	0.6061	0.6026	0.9067	0.68	0.8108	0.2558	0	0	0.5	62
TTYH1	Candidate gene	0.64	0.27	0.73	0.9706	0.5729	0.5591	0.6923	0	0	0.78	0.2353	0	0	0	0.617	0	0	0	0.7317	0	0.63	0.23	0.18	0.62	0.16	0.59	0.65	0.55	0.22	0	0.8254	0.1587	0.6349	0.58	0.6061	0.6026	0.76	0.31	0.3649	0.8372	0.2604	0.5729	0.5	63
COG4	Candidate gene	0.65	0.48	0.12	0.9265	0.5729	0.5591	0.1846	0	0.6667	0.78	0	0	0	0	0	0	0	0.6818	0	0.9231	0.2	0.52	0.47	0.62	0.56	0.59	0.65	0.06	0.53	0.2683	0.3333	0.746	1	0.58	0.6061	0.6026	0.0533	0.68	0.3243	0.6977	0.3958	0.5729	0.5	64
ZNF329	Candidate gene	0.66	0.87	0.73	0	0.5729	0.5591	0	0	0	0.78	0	0	0	0	0	0	0.5846	0	0	0	0.63	0.23	0.18	0.62	0.16	0.08	0.09	0.55	0.22	0	0.6349	0.7302	0.5714	0.58	0.6061	0.6026	0.44	0.68	0.7838	0.9535	0.5313	0.5729	0.5	65
TECTA	Candidate gene	0.67	0.87	0.12	0.7647	0.5729	0.5591	0.6923	0	0	0.78	0	0	0	0	0	0	0.0615	0.6818	0.9268	0.8077	0.63	0.88	0.79	0.62	0.89	0.59	0.65	0.55	0.9	0	0.2381	0.254	0.5556	0.58	0.6061	0.6026	0.9067	0.26	0.027	0.0581	0.1146	0	0	66
DDX28	Candidate gene	0.68	0.27	0.73	0.7941	0.5729	0.5591	0.6923	0	0	0.78	0	0	0	0	0	0	0	0	0	0	0.63	0.75	0.79	0.62	0.89	0.59	0.65	0.55	0.79	0.5366	0.4603	0.7937	0.3016	0.58	0.6061	0.6026	0.3867	0.68	0.3108	0.1977	0.9167	0.5729	0.5	67
SEMA3E	Candidate gene	0.69	0.87	0.73	0.6912	0.5729	0.5591	0.6923	0	0	0.78	0.3824	0	0	0.6364	0.617	0.6897	0.5846	0.6818	0.561	0.3846	0.63	0.88	0.79	0.62	0.89	0.59	0.65	0.55	0.9	0.8537	0.6825	0.1905	0.9365	0.58	0.6061	0.6026	0.9067	0.68	0.2432	0.0116	0.8646	0.5729	0.5	68
FCAR	Candidate gene	0.7	0.61	0.73	0.4118	0.5729	0.5591	0.6923	0	0.6667	0.78	0	0	0.3043	0	0.617	0	0.5846	0	0	0.6538	0.63	0.88	0.56	0.62	0.76	0.59	0.28	0.55	0.77	0.6341	0.1111	0.0952	0.5238	0.58	0.6061	0.6026	0.9067	0.68	0	0.7791	0.9688	0.5729	0.5	69
KLK4	Candidate gene	0.71	0.87	0.73	0.5294	0.5729	0.5591	0.6923	0	0.6667	0.78	0	0	0	0.6364	0.617	0	0.5846	0.6818	0.4878	0.9615	0.63	0.23	0.37	0.62	0.24	0.59	0.13	0.55	0.22	0	0	0	0	0.58	0.6061	0.6026	0.9067	0.68	0.4324	0.314	0.8333	0.5729	0.5	70
TTYH1	Candidate gene	0.72	0.27	0.73	0.9706	0.5729	0.5591	0	0	0	0.78	0	0	0	0	0.617	0	0	0	0.7317	0	0.63	0.23	0.79	0.62	0.16	0.59	0.65	0.55	0.22	0	0	0	0	0.58	0.6061	0	0	0.31	0	0	0.2604	0.5729	0	71
CD109	Candidate gene	0.74	0.87	0.73	0	0.5729	0.5591	0.6923	0	0	0.44	0	0	0	0	0	0	0.5846	0	0.9268	0	0.63	0.88	0.79	0.62	0.89	0.59	0.65	0.55	0.9	0	0	0	0	0.58	0.6061	0.6026	0.5733	0.68	0.0135	0.0814	0.3854	0.5729	0.5	73
GRIK4	Candidate gene	0.75	0.87	0.73	0.3235	0.5729	0.5591	0.6923	0.7	0	0.5	0.7353	0	0.8261	0	0.617	0.6897	0.0615	0	0.8293	0	0.63	0.88	0.79	0.62	0.89	0.59	0.65	0.55	0.9	0	0.3651	0.1111	0.8254	0.58	0.6061	0.6026	0	0.68	0.7432	0.3605	0.4167	0	0	74
SLC35F3	Candidate gene	0.76	0.87	0.73	0	0.5729	0.5591	0.6923	0	0	0.78	0	0	0	0	0	0	0.5846	0	0	0	0.63	0.23	0.79	0.62	0.89	0.59	0.65	0.55	0.22	0	0	0	0	0.58	0.6061	0.6026	0	0.68	0.7568	0.7907	0.6146	0.5729	0.5	75
ZNF667	Candidate gene	0.77	0.87	0.73	0.2647	0.5729	0.5591	0	0	0	0.78	0.7353	0	0	0	0	0	0.5846	0	0	0	0.63	0.23	0.79	0.62	0.24	0.59	0.65	0.55	0.22	0	0.619	0.8571	0.7302	0.58	0.6061	0.6026	0.3867	0.68	0	0.9535	0.5625	0.5729	0.5	76
ZNF784	Candidate gene	0.78	0.87	0.73	0	0.5729	0.5591	0.6923	0	0	0.78	0	0	0	0	0	0	0.5846	0	0	0	0.63	0.12	0.79	0.62	0.11	0.59	0.65	0.55	0.11	0	0	0	0	0.58	0.1212	0.6026	0.9067	0.68	0.4595	0.9535	0.6458	0.5729	0.5	77
BHLHE40	Candidate gene	0.79	0.55	0.73	0.4706	0.5729	0.5591	0	0	0.6667	0.15	0.7353	0.7778	0.3913	0.6364	0.617	0.6897	0.5846	0	1	0.8077	0.63	0.4	0.45	0.13	0.42	0.59	0.2	0.55	0.4	0.9024	0.7937	0.8413	0.9206	0.58	0.0505	0.6026	0.2933	0.68	0.6892	0.407	0	0.5729	0.5	78
IMPG1	Candidate gene	0.8	0.87	0.73	0.3676	0.5729	0.5591	0.6923	0	0.6667	0.78	0	0	0	0	0	0	0.5846	0	0	0	0.63	0.88	0.79	0.62	0.89	0.59	0.65	0.55	0.9	0.878	0.2857	0.2222	0.8413	0.58	0.6061	0.6026	0	0.68	0.7973	0.2907	0.3333	0.5729	0.5	79
NAT14	Candidate gene	0.81	0.87	0.73	0.8971	0.5729	0.5591	0.6923	0	0	0.78	0	0.7778	0	0	0.617	0	0	0	0	0	0.63	0.52	0.79	0.62	0.4	0.59	0.65	0.55	0.53	0	0	0	0	0.58	0.6061	0.6026	0.52	0.68	0	0.907	0.7708	0.5729	0.5	80
PMFBP1	Candidate gene	0.82	0.27	0.73	0	0	0	0.1846	0	0	0.78	0	0	0	0	0	0	0.5846	0	0	0	0.63	0.88	0.79	0.62	0.89	0.59	0.65	0.55	0.9	0	0.5238	0.6984	0.5397	0.58	0.6061	0.0641	0.9067	0.34	0.7162	0.7558	0.7813	0.5729	0.5	81
ODF2	Candidate gene	0.83	0.48	0.21	0.2941	0.5729	0	0.1846	0	0.6667	0.78	0.7353	0	0	0.6364	0.617	0.6897	0.5846	0	0.6098	0	0.63	0.32	0.79	0.62	0.21	0.59	0.13	0.55	0.22	1	1	0.9841	0.254	0.58	0.6061	0.6026	0.5067	0.13	0.9595	0.7558	0.2292	0.5729	0.5	82
NLRP5	Candidate gene	0.84	0.27	0.35	0	0.5729	0.5591	0.6923	0	0	0.26	0	0	0	0	0	0	0.5846	0	0.9268	0	0.2	0.23	0.79	0.62	0.16	0.59	0.65	0.55	0.22	0	0	0	0	0.58	0	0.6026	0	0.68	0.8378	0.8488	0.9479	0.5729	0.5	83
CCDC106	Candidate gene	0.85	0.87	0.73	0.9412	0	0	0.1846	0	0	0.78	0	0	0	0	0	0	0	0	0	0	0.63	0.47	0.49	0.17	0.46	0.59	0.23	0.55	0.38	0.7805	0.8413	0.7143	0.746	0.58	0.6061	0.6026	0.1867	0.68	0.8243	0.814	0.8229	0.5729	0.5	84
FCAR	Candidate gene	0.86	0.61	0.73	0.4118	0.5729	0	0	0	0	0.78	0	0	0.3043	0	0.617	0	0.5846	0	0	0.6538	0.63	0.88	0.79	0.62	0.76	0.59	0.28	0.55	0.77	0	0	0	0	0.58	0.6061	0	0	0.68	0	0	0.9688	0.5729	0.5	85
FRMPD2	Candidate gene	0.87	0.48	0.35	0	0.5729	0.5591	0.6923	0	0	0.26	0	0	0	0	0	0	0.5846	0	0	0	0.63	0.88	0.79	0.62	0.89	0.59	0.65	0.55	0.9	0	0	0	0	0.58	0.6061	0.6026	0.44	0.68	0.6757	0.3256	1	0.5729	0.5	86
FCAR	Candidate gene	0.88	0.61	0.73	0.4118	0	0	0	0	0	0.78	0	0	0.3043	0	0.617	0	0.5846	0	0	0.6538	0.63	0.88	0.79	0.62	0.76	0.59	0.28	0.55	0.77	0	0	0	0	0.58	0.6061	0	0	0.68	0	0	0.9688	0.5729	0	87
ZNF8	Candidate gene	0.89	0.87	0.73	0	0.5729	0.5591	0	0	0	0.78	0	0	0	0	0	0	0	0	0	0	0.63	0.88	0.53	0.62	0.63	0.59	0.17	0.55	0.7	0	0.1587	0.8254	0.873	0.58	0.6061	0.6026	0.44	0.68	0.8514	0.9535	0.4688	0.5729	0.5	88
ZNF274	Candidate gene	0.9	0.48	0.35	0.9118	0.5729	0.5591	0	0	0.6667	0.78	0.7353	0	0.8261	0.6364	0.617	0.6897	0	0	0	0	0.63	0.88	0.37	0.1	0.4	0.59	0.65	0.55	0.9	0.6585	0.6667	0.7619	0.8571	0.58	0.6061	0.6026	0.6533	0.68	0.9189	0.9535	0.9063	0.5729	0.5	89
DEPDC4	Candidate gene	0.91	0.87	0.73	0	0.5729	0.5591	0	0	0	0.78	0	0	0	0	0	0	0	0	0	0	0.63	0.88	0.79	0.62	0.89	0.59	0.65	0.55	0.9	0	0	0	0	0.58	0.6061	0.6026	0.9067	0.68	0.8649	0.8721	0.8438	0.5729	0.5	90
ZNF544	Candidate gene	0.92	0.87	0.73	0	0.5729	0.5591	0	0	0	0.78	0.7353	0	0	0	0	0	0.5846	0	0	0	0.63	0.88	0.79	0.62	0.89	0.59	0.65	0.55	0.9	0	0.127	0.619	0.8095	0.58	0.6061	0.6026	0.7067	0.68	0	0.9535	0.125	0.5729	0.5	91
PRIMA1	Candidate gene	0.93	0.61	0.73	0.8382	0	0	0.6923	0	0.6667	0.26	0	0	0	0	0	0	0.5846	0	0.5854	0	0.11	0.88	0.79	0.62	0.89	0.59	0.65	0.55	0.9	0	0	0	0	0.12	0.6061	0	0.9067	0.68	0.9459	0.4884	0.5521	0.5729	0.5	92
DYRK3	Candidate gene	0.94	0.87	0.73	0.8088	0.5729	0.5591	0	0	0	0.78	0	0	0	0	0.617	0	0	0	0.9268	0	0.63	0.88	0.79	0.62	0.89	0.59	0.65	0.55	0.9	0	0	0	0	0.58	0.6061	0	0	0.68	0	0	0.5	0.5729	0.5	93
KLK11	Candidate gene	0.95	0.27	0.73	0.7206	0.5729	0.5591	0.6923	0	0.6667	0.44	0	0	0	0	0	0	0.5846	0	0	0	0.63	0.88	0.79	0.62	0.89	0.59	0.65	0.55	0.9	0.9268	0.9683	0.3651	0.9524	0.58	0.6061	0.0641	0.8	0.68	0.6486	0.2674	0.8958	0.5729	0.5	94
ZNF583	Candidate gene	0.96	0.87	0.73	0	0.5729	0.5591	0	0	0	0.78	0.7353	0	0	0	0	0	0	0	0	0	0.63	0.88	0.79	0.62	0.89	0.59	0.65	0.55	0.9	0	0	0	0	0.12	0.6061	0.6026	0.9067	0.68	0	0.9535	0.6354	0.5729	0.5	95
ZNF581	Candidate gene	0.97	0.87	0.73	0	0.5729	0.5591	0.6923	0	0	0.78	0	0	0	0	0	0	0.5846	0	0	0	0.63	0.71	0.79	0.62	0.89	0.59	0.65	0.55	0.73	0	0	0	0	0.58	0.6061	0	0.0933	0.68	1	0.9535	0.6042	0.5729	0.5	96
ZNF530	Candidate gene	0.98	0.87	0.73	0	0.5729	0.5591	0.6923	0	0	0.26	0.7353	0	0	0	0	0	0	0	0	0	0.63	0.88	0.79	0.62	0.89	0.59	0.65	0.55	0.9	0	0	0	0	0.58	0.6061	0	0.9067	0.68	0.9865	0.8837	0.8542	0.5729	0.5	97
KLK12	Candidate gene	0.99	0.87	0.73	0.8676	0.5729	0.5591	0.6923	0	0.6667	0.78	0	0	0	0	0	0	0.5846	0	0	0	0.63	0.88	0.79	0.62	0.89	0.59	0.65	0.55	0.9	0	0.5714	0.5714	0.9683	0.58	0.6061	0.0641	0.9067	0.68	0	0.1744	0.9896	0	0.5	98
DYRK3	Candidate gene	1	0.87	0.73	0.8088	0.5729	0.5591	0	0	0	0.78	0	0	0	0	0.617	0	0	0	0.9268	0	0.63	0.88	0.79	0.62	0.89	0.59	0.65	0.55	0.9	0.9756	0.9048	1	0.9841	0.58	0.6061	0.6026	0	0.68	0.5811	0.5233	0.5	0.5729	0.5	99

## Sheet: WorkingCow_Skeletal_Muscle
Gene name	Group	P-value	Annotation â€“ Gene Ontology	Annotation â€“ UniProt	Text-mining	Annotation â€“ InterPro	Annotation â€“ Pfam	Annotation â€“ SIMAP (localization)	Annotation â€“ DrugBank	Annotation â€“ Stitch	Annotation â€“ RGD ChEBI	Annotation â€“ Reactome	Annotation â€“ WikiPathways	Annotation â€“ RGD pathways	Annotation â€“ BioCarta	Annotation â€“ CPDB	Annotation â€“ hiPathDB	Annotation â€“ GAD	Annotation â€“ OMIM	Annotation â€“ RGD MP	Annotation â€“ RGD RDO	Interaction â€“ String	Interaction â€“ BioGrid	Interaction â€“ I2D	Interaction â€“ IntAct	Interaction â€“ iRefIndex	Interaction â€“ Mint	Interaction â€“ HPRD	Interaction â€“ MIPS	Interaction â€“ GeneRIF	Expression â€“ Su et al (2002)	Expression â€“ Su et al (2004)	Expression â€“ CMAP	Expression â€“ Lukk et al	Annotation â€“ PaGenBase	Annotation â€“ CGAP	Annotation â€“ GNF	Annotation â€“ eGenetics	Blast	Precalculated â€“ Ouzounis	Precalculated â€“ Prospectr	Precalculated â€“ HaploPred	Annotation â€“ Aura	Annotation â€“ mirZ	id
ACTA1	Training gene	0.009	0.0092	0.009	0.0543	0.0297	0.04	0	0.0476	0	0.0642	0	0.0345	0	0.0526	0.0781	0.2308	0.1124	0.0323	0.0392	0.0294	0.045	0.045	0.045	0.036	0.045	0.027	0.036	0.5676	0.045	0.0556	0.0172	0.2241	0.0172	0.0092	0.1143	0.0286	0	0.045	0.0959	0.575	0.0381	0.6224	0.506	0
RYR1	Training gene	0.018	0.0275	0.2793	0.0978	0.0495	0.03	0.169	0.0952	0.0263	0.2936	0.1935	0.1034	0.119	0	0.0156	0.1795	0.0112	0.0645	0.098	0.0882	0.0721	0.045	0.045	0.036	0.045	0.027	0.036	0.5676	0.045	0.1667	0.0345	0.1552	0.0517	0.0642	0.1714	0.0571	0.2206	0.045	0	0.0375	0.5429	0.6224	0.506	1
GYS1	Training gene	0.027	0.7798	0.045	0.0652	0.0594	0.06	0	0	0.1316	0.1193	0.0323	0.1724	0.0476	0.1053	0.0313	0.0256	0.0225	0.1935	0.1373	0.3235	0.0991	0.045	0.045	0.036	0.045	0.027	0.036	0.5676	0.045	0.0833	0.069	0.2759	0.0862	0.0367	0.0762	0.1286	0.0735	0.045	0.1233	0.225	0.2952	0.2347	0.506	2
ACTB	Training gene	0.036	0.0183	0.036	0.1087	0.0297	0.04	0	0	0	0.0826	0.129	0.069	0.1429	0.2105	0.0625	0.1282	0.5843	0.129	0.0196	0.2059	0.009	0.045	0.045	0.036	0.045	0.027	0.036	0.009	0.045	0.1389	0.569	0.4138	0.1379	0.1743	0.0571	0.1286	0.4559	0.045	0.0822	0.4625	0.0095	0.2041	0.506	3
SLC2A4	Training gene	0.045	0.1193	0.0721	0.1196	0.0792	0.1	0.169	0	0.0526	0.1284	0.0645	0.1379	0.0238	0.1579	0.0469	0.0513	0.1461	0.2258	0.0588	0.2353	0.0991	0.045	0.045	0.036	0.045	0.027	0.036	0.5676	0.045	0.1111	0.5345	0.1034	0.1207	0.0367	0.0952	0.6286	0.0882	0.045	0.1918	0.4625	0.3333	0.6224	0.506	4
MYH1	Training gene	0.0541	0.055	0.0541	0.0435	0.099	0.07	0.169	0	0	0.0275	0	0	0.0952	0	0.1094	0.0769	0.1348	0	0.2157	0	0.009	0.045	0.045	0.036	0.045	0.5405	0.036	0.5676	0.045	0	0.0517	0.0172	0.0345	0.0275	0.1714	0.1857	0.1324	0.045	0.4521	0.6375	0.0667	0.6224	0.506	5
MSTN	Training gene	0.0631	0.1101	0.7027	0.1304	0.0693	0.09	0.662	0	0.1053	0.0459	0	0.2069	0	0	0.1719	0	0.1236	0.1613	0.1569	0.2941	0.0991	0.045	0.045	0.5766	0.045	0.5405	0.036	0.5676	0.045	0.1944	0.431	0.0517	0.1034	0.0183	0.6095	0.6286	0.0147	0.045	0.2329	0.55	0.0571	0.6224	0.506	6
MICAL1	Training gene	0.0721	0.0367	0.018	0.0109	0.0099	0.01	0.169	0	0	0.1743	0	0	0	0	0	0	0	0	0	0	0.1622	0.045	0.045	0.5766	0.045	0.027	0.036	0.009	0.045	0	0.6897	0.5345	0.1552	0.5872	0.6095	0.6286	0.3088	0.045	0.8904	0.4625	0.9619	0.0918	0.506	7
MICAL2	Training gene	0.0811	0.0367	0.018	0.0217	0.0198	0.02	0	0	0	0.1376	0	0	0	0	0	0	0.5843	0	0	0	0.1622	0.045	0.045	0.5766	0.045	0.5405	0.6396	0.5676	0.045	0.2222	0.5862	0.431	0.2241	0.5872	0.0286	0.6286	0.3382	0.045	0.5753	0.15	0.2857	0.0918	0.506	8
SEPN1	Training gene	0.0901	0.3303	0.2252	0.0761	0.1188	0.56	0.662	0	0.1842	0.3486	0	0	0	0	0.5938	0	0	0.0968	0.1961	0.0588	0.045	0.045	0.045	0.036	0.045	0.5405	0.6396	0.5676	0.045	0	0	0	0	0.5872	0.0952	0	0.1176	0.045	0.2192	0.3875	0.7429	0.0918	0.506	9
APP	Candidate gene	0.0991	0.0917	0.1441	0.2283	0.5644	0.56	0.169	0.5714	0.2105	0.1101	0.3871	0.8621	0.5714	0.2632	0.1406	0.2564	0.0674	0.6129	0.2549	0.2647	0.036	0.7568	0.2973	0.1171	0.5045	0.5405	0.2342	0.027	0.7748	0.4444	0.7414	0.6207	0.2759	0.5872	0.0286	0.6286	0.4559	0.6126	0.0137	0.3375	0.019	0.1939	0.506	10
SLC1A2	Candidate gene	0.1081	0.789	0.7027	0.4022	0.5644	0.56	0.662	0.5714	0.1579	0.0917	0.2581	0	0.6429	0	0.5938	0.641	0.5843	0	0.4902	0.1765	0.1171	0.3964	0.1261	0.0901	0.0991	0.5405	0.0811	0.5676	0.2793	0.3056	0.6034	0.4655	0.6379	0.5872	0.6095	0.6286	0.5294	0.6126	0.0548	0.0375	0.1333	0.6224	0.506	11
COL4A1	Candidate gene	0.1171	0.0826	0.1441	0.2717	0.5644	0.56	0.662	0	0.7105	0.0183	0.2903	0.2759	0.5	0.6316	0.5938	0.641	0.0674	0.6129	0.1765	0.1176	0.5946	0.6126	0.4685	0.5766	0.5225	0.5405	0.6396	0.5676	0.7117	0.5833	0.9655	0.7241	0.2414	0.156	0.6095	0.1286	0	0.6126	0	0.0125	0.0476	0.6224	0.506	12
DRD2	Candidate gene	0.1261	0.5413	0.2432	0.2065	0.5644	0.56	0.662	0.5714	0.7105	0.3211	0.8387	0.2414	0.7619	0.6316	0.5938	0.641	0.0674	0.6129	0.0784	0.1471	0.5946	0.8829	0.3514	0.5766	0.3333	0.5405	0.2703	0.5676	0.5676	0.5556	0.3103	0.3621	0.5	0.5872	0.6095	0.6286	0.0147	0.6126	0.1096	0.15	0.581	0.6224	0.506	13
COX7A1	Training gene	0.1351	0.7064	0.7027	0.0326	0.0891	0.08	0.662	0.1429	0.7105	0.156	0	0.5517	0.3571	0	0.5938	0	0.5843	0	0.2353	0	0.5946	0.8829	0.7387	0.5766	0.8378	0.5405	0.6396	0.5676	0.8919	0.0278	0.0862	0.0345	0.069	0.055	0.0667	0.0143	0.1471	0.0991	0.9726	0.975	0.781	0.6224	0.506	14
ITCH	Candidate gene	0.1441	0.3303	0.3514	0.6739	0.5644	0.56	0.169	0	0.7105	0.422	0.3871	0.8621	0.6905	0.6316	0.1406	0.641	0.5843	0.6129	0.8431	0.6471	0.5946	0.6757	0.3694	0.1351	0.4865	0.5405	0.1081	0.0541	0.5586	0.5278	0.6207	0.5	0.4655	0.5872	0.6095	0.6286	0.2353	0.6126	0.6027	0.0375	0.0762	0.6224	0.506	15
PARD3	Candidate gene	0.1532	0.1376	0.2973	0.1739	0.5644	0.56	0.169	0	0	0.3028	0.8387	0	0.5476	0.6316	0.125	0.1026	0.5843	0	0.451	0	0.5946	0.7387	0.4144	0.1532	0.5315	0.0811	0.2523	0.5676	0.7568	0.6667	0.3448	0.7586	0.3966	0.0917	0.6095	0.0571	0.2794	0.6126	0.1781	0.6875	0.1524	0.6224	0.506	16
NFRKB	Candidate gene	0.1622	0.4495	0.7027	0.163	0.5644	0.56	0.169	0	0	0.4862	0	0	0	0	0	0	0.5843	0	0	0	0.5946	0.3784	0.1441	0.1441	0.3694	0.5405	0.6396	0.036	0.4505	0.6111	0.2759	0.7069	0.3448	0.5872	0.6095	0.6286	0.0441	0.6126	0	0.75	0.5333	0.6224	0.506	17
PRPF31	Candidate gene	0.1712	0.4495	0.1441	0.587	0.5644	0.56	0.169	0	0.7105	0.7615	0	0	0.9048	0	0.5938	0	0.5843	0.6129	0.7059	0.6471	0.5946	0.5676	0.3063	0.1081	0.5856	0.5405	0.6396	0.1351	0.6216	0.25	0.5	0.3276	0.3621	0.5872	0.6095	0.1286	0.1029	0.6126	0.1644	0.65	0.4762	0.6224	0.506	18
PIGU	Candidate gene	0.1802	0.211	0.7027	0	0.5644	0.56	0.662	0	0	0.7615	0.0968	0	0.2143	0.6316	0.5938	0.641	0.5843	0	0	0	0.5946	0.6577	0.2342	0.5766	0.2252	0.5405	0.6396	0.5676	0.7117	0	0	0	0	0.5872	0.6095	0.6286	0.0588	0.6126	0.7123	0.55	0.6	0.6224	0.506	19
APLP2	Candidate gene	0.1892	0.4495	0.7027	0.5326	0.5644	0.56	0.169	0	0.7105	0.1743	0	0	0	0	0	0	0.5843	0	0.5098	0.4118	0.1802	0.6396	0.4234	0.5766	0.5405	0.5405	0.2613	0.5676	0.6937	0.8889	0.7759	0.2414	0.6207	0.5872	0.0286	0.2143	0.2794	0.1351	0.3973	0.075	0.4095	0.0918	0.506	20
PIP4K2A	Candidate gene	0.1982	0.211	0.3514	0.25	0.5644	0.56	0	0	0.2895	0.0459	0.5806	0.3103	0.5952	0.6316	0.5938	0.1538	0.5843	0	0	0	0.5946	0.2162	0.2613	0.5766	0.2613	0.5405	0.0991	0.5676	0.1171	0.7222	0.931	0.6379	0.2586	0.5872	0.6095	0.6286	0.7353	0.6126	0.7397	0.325	0.7619	0.6224	0.506	21
ZW10	Candidate gene	0.2072	0.2936	0.2973	0.7935	0.5644	0.56	0.169	0	0	0.422	0.8387	0	0	0	0.5938	0.641	0.5843	0	0	0	0.5946	0.7117	0.3874	0.5766	0.6306	0.5405	0.6396	0.5676	0.5495	0.2778	0.1379	0.5517	0.569	0.5872	0.6095	0.6286	0.6912	0.6126	0.2055	0.3875	0.1905	0.6224	0.506	22
NXN	Candidate gene	0.2162	0.7064	0.3514	0.8261	0.5644	0.56	0	0	0.2895	0.4862	0	0.8621	0	0	0.5938	0	0.5843	0	0.3725	0	0.5946	0.3153	0.4324	0.5766	0.4955	0.5405	0.6396	0.5676	0.3694	0	0.2069	0.8793	0.1724	0.5872	0.0952	0.6286	0.2794	0.1892	0.589	0.3875	0.381	0.2143	0.506	23
ATG5	Candidate gene	0.2252	0.0642	0.3514	0.4457	0.5644	0.56	0	0	0.0789	0.422	0.3871	0.8621	0.619	0	0.5938	0.641	0.5843	0	0.1176	0	0.1351	0.6937	0.1802	0.1261	0.4775	0.5405	0.6396	0.5676	0.7387	0.8611	0.1897	0.3103	0.6034	0.5872	0.6095	0.6286	0.6618	0.1622	0.7808	0.75	0.3143	0.6224	0.506	24
BCKDHB	Candidate gene	0.2342	0.633	0.1441	0.413	0.5644	0.56	0.662	0	0.3684	0.4862	0.5806	0.8621	0.2143	0	0.5938	0.641	0.5843	0.6129	0	0.4118	0.5946	0.2162	0.0991	0.5766	0.8378	0.5405	0.6396	0.5676	0.3694	0.8056	0.6724	0.7759	0.8966	0.5872	0.6095	0.6286	0.25	0.6126	0.0411	0.1	0.419	0.6224	0.506	25
DLC1	Candidate gene	0.2432	0.1284	0.3514	0.2826	0.5644	0.56	0	0	0.7105	0.1376	0.8387	0	0	0.6316	0.5938	0.641	0.1461	0.6129	0.3922	0.6471	0.0811	0.7297	0.3784	0.5766	0.4595	0.5405	0.6396	0.5676	0.3964	1	0.2586	0.7931	0.3103	0.5872	0.6095	0.6286	0.5882	0.6126	0.6712	0.0375	0.5524	0.2143	0.506	26
DLGAP4	Candidate gene	0.2523	0.4495	0.7027	0.8043	0.5644	0.56	0.662	0	0	0.3303	0	0	0	0	0	0	0.5843	0	0	0	0.5946	0.6937	0.1712	0.0721	0.2252	0.0721	0.2432	0.5676	0.7387	0	0	0	0	0.5872	0.6095	0.6286	0.3382	0.6126	0.3014	0.15	0.7143	0.6224	0.506	27
TRPC3	Candidate gene	0.2613	0.7615	0.7027	0.5109	0.1089	0.11	0.662	0	0.7105	0.7615	0.2903	0	0	0.6316	0.5938	0.641	0.5843	0	0.3137	0.6471	0.027	0.8829	0.2252	0.5766	0.2883	0.5405	0.0901	0.5676	0.4054	0.8333	0.1724	0.1724	0.5345	0.5872	0.6095	0.6286	0.7794	0.6126	0.6986	0.725	0.3238	0.6224	0.506	28
PPP1R9A	Candidate gene	0.2703	0.0734	0.2342	0.087	0.5644	0.56	0.169	0	0	0.3119	0	0	0	0	0	0	0.5843	0	0.902	0	0.5946	0.3514	0.1982	0.5766	0.1982	0.5405	0.1261	0.5676	0.2973	0	0.4483	0.9483	0.3793	0.5872	0.6095	0.6286	0.7353	0.6126	0.3288	0.6875	0.2476	0.6224	0.506	29
CACNA2D1	Candidate gene	0.2793	0.6422	0.7027	0.2391	0.5644	0.56	0.662	0.5714	0.3947	0.0734	0	0.8621	0.1667	0	0.5938	0.2051	0.5843	0	0.2941	0	0.0631	0.8829	0.2613	0.5766	0.8378	0.5405	0.6396	0.5676	0.8919	0.6389	0.1207	0.6552	0.2069	0.0917	0.6095	0.6286	0.7794	0.6126	0.5342	0.075	0.3048	0.6224	0.506	30
ABCG2	Candidate gene	0.2883	0.4495	0.7027	0.1957	0.5644	0.56	0.662	0.5714	0.7105	0.1009	0.4839	0.8621	0.0714	0.6316	0.5938	0.641	0.0674	0.6129	0.4706	0.3529	0.1441	0.1081	0.1892	0.5766	0.3514	0.5405	0.6396	0.5676	0.0991	0.5	0.6552	1	0.8448	0.5872	0.6095	0.6286	0.5294	0.6126	0.3562	0.15	0.9619	0.6224	0.506	31
INVS	Candidate gene	0.2973	0.3303	0.2162	0.6957	0.1287	0.56	0.169	0	0	0.7615	0	0	0	0	0	0	0.5843	0.6129	0.3529	0.9412	0.5946	0.7207	0.2162	0.5766	0.1982	0.5405	0.6396	0.5676	0.2973	0.3333	0.2414	0.6724	0.5862	0.5872	0.6095	0.6286	0.9118	0.6126	0.0274	0.15	0.2	0.6224	0.506	32
OPCML	Candidate gene	0.3063	0.9083	0.1441	0.1413	0.5644	0.56	0.662	0	0	0.4862	0	0	0	0	0	0	0.5843	0.6129	0	0	0.5946	0.8829	0.4595	0.5766	0.6577	0.5405	0.6396	0.5676	0.8919	0.3611	0.3621	0.2931	0.4138	0.5872	0.6095	0	0.5	0.6126	0.4932	0.25	0.1238	0.6224	0.506	33
USP28	Candidate gene	0.3153	0.7615	0.7027	0.75	0.5644	0.56	0.169	0	0	0.5138	0	0	0	0	0	0	0	0	0	0	0.5946	0.6216	0.4414	0.5766	0.4595	0.5405	0.6396	0.5676	0.6847	0	0	0	0	0.5872	0.6095	0.6286	0.7794	0.6126	0.5205	0.3875	0.1429	0.6224	0.506	34
LENG8	Candidate gene	0.3243	0.4495	0.7027	0	0.5644	0.56	0	0	0	0.422	0	0	0	0	0	0	0	0	0	0	0.5946	0.3514	0.4054	0.5766	0.2613	0.0631	0.6396	0.5676	0.3333	0	0	0	0	0.5872	0.6095	0	0.3382	0.1712	0.5479	0.85	0.7143	0.0918	0.506	35
PEX1	Candidate gene	0.3333	0.3303	0.2613	0.663	0.5644	0.56	0.662	0	0.7105	0.7615	0	0	0	0	0.5938	0	0.5843	0.6129	0	0.8824	0.5946	0.2162	0.1081	0.5766	0.3514	0.5405	0.6396	0.5676	0.2973	0.3889	0.7069	0.5862	0.8276	0.5872	0.0286	0.6286	0.6176	0.6126	0.0685	0.9125	0.1619	0.6224	0.506	36
LENG8	Candidate gene	0.3423	0.4495	0.7027	0	0.5644	0.56	0	0	0	0.422	0	0	0	0	0	0	0	0	0	0	0.5946	0.3514	0.7387	0.5766	0.2613	0.5405	0.6396	0.5676	0.3333	0	0	0	0	0.5872	0.6095	0	0	0.1712	0	0	0.7143	0.0918	0.506	37
TSPAN9	Candidate gene	0.3514	0.9083	0.7027	0.4239	0.5644	0.56	0.662	0	0	0.7615	0	0	0	0	0	0	0.5843	0	0	0	0.5946	0.1081	0.7387	0.5766	0.1351	0.5405	0.6396	0.5676	0.0991	0.4167	0.4828	0.8621	0.2931	0.1193	0.0286	0.6286	0.5735	0.6126	0.6438	0.2125	0.6952	0.6224	0.506	38
NDUFA3	Candidate gene	0.3604	0.7064	0.7027	0.3478	0.5644	0.56	0.662	0.5714	0	0.2294	0	0.5517	0.3571	0	0.5938	0.641	0.5843	0	0	0	0.5946	0.2162	0.7387	0.5766	0.8378	0.5405	0.6396	0.5676	0.1982	0	0	0	0	0.5872	0.1714	0	0	0.6126	0	0	0.8286	0.0918	0.506	39
FGF12	Candidate gene	0.3694	0.4495	0.7027	0.5217	0.5644	0.56	0.662	0	0.7105	0.422	0	0.3103	0.5	0	0.5938	0.641	0.5843	0	0.902	0	0.5946	0.6577	0.7387	0.5766	0.8378	0.5405	0.6396	0.5676	0.6216	0.7778	0.4655	0.3793	0.1897	0.156	0.6095	0.6286	0.9118	0.6126	0.3425	0.625	0.0286	0.6224	0.506	40
PRPF31	Candidate gene	0.3784	0.4495	0.1441	0.587	0.5644	0.56	0	0	0	0.7615	0	0	0.9048	0	0.5938	0	0.5843	0.6129	0.7059	0.6471	0.5946	0.5676	0.7387	0.5766	0.5856	0.5405	0.6396	0.0901	0.6216	0	0	0	0	0.5872	0.6095	0	0	0.6126	0	0	0.4762	0.6224	0.506	41
PLXDC2	Candidate gene	0.3874	0.4495	0.7027	0.1522	0.5644	0.56	0.662	0	0.7105	0.2752	0	0	0	0	0	0	0.5843	0	0	0	0.1261	0.3514	0.7387	0.5766	0.3514	0.5405	0.6396	0.5676	0.3694	0	0	0	0	0.5872	0.6095	0.6286	0	0.6126	0.9863	0.6875	0.219	0.6224	0.506	42
METTL16	Candidate gene	0.4595	0.9083	0.7027	0.7174	0.5644	0.56	0	0	0.7105	0.422	0	0	0	0	0	0	0.5843	0	0	0	0.5946	0.3153	0.2613	0.5766	0.2252	0.5405	0.6396	0.5676	0.2973	0	0.1034	0.8448	0.5517	0.1376	0.6095	0.6286	0.1618	0.6126	0.274	0.3875	0	0	0.506	50
PRPF31	Candidate gene	0.4685	0.4495	0.1441	0.587	0.5644	0.56	0	0	0	0.7615	0	0	0.9048	0	0.5938	0	0.5843	0.6129	0.7059	0.6471	0.5946	0.5676	0.7387	0.5766	0.5856	0.5405	0.6396	0.0901	0.6216	0	0	0	0	0.5872	0.6095	0	0	0.6126	0	0	0.4762	0.6224	0	51
FABP7	Candidate gene	0.5315	0.211	0.3514	0.4891	0.5644	0.56	0	0.5714	0.7105	0.0092	0	0	0	0	0.5938	0	0.5843	0	0.8627	0	0.5946	0.8829	0.1081	0.5766	0.8378	0.5405	0.6396	0.5676	0.8919	0.75	0.7586	0.0862	0.8103	0.5872	0.6095	0.6286	0.6912	0.6126	0.6849	0.575	0.1048	0.6224	0.506	58
SLC25A27	Candidate gene	0.5405	0.211	0.7027	0.4674	0.5644	0.56	0	0	0	0.3486	0	0.5517	0	0	0.5938	0	0.5843	0	0	0.4118	0.5946	0.8829	0.1532	0.5766	0.1351	0.5405	0.6396	0.5676	0.8919	0	0	0	0	0.5872	0.6095	0	0	0.6126	0.6164	0.3	0.7714	0.0918	0.506	59
STX12	Candidate gene	0.5495	0.3303	0.7027	0.7717	0.5644	0.56	0.169	0	0	0.7615	0.8387	0	0	0	0.5938	0	0	0	0	0	0.5946	0.5135	0.3243	0.5766	0.5135	0.5405	0.2162	0.045	0.4595	0.4722	0.8621	0.3448	0.3276	0.5872	0.6095	0.6286	0	0.6126	0.863	0.75	0.1143	0.6224	0.506	60
TTYH1	Candidate gene	0.5586	0.211	0.7027	0.8478	0.5644	0.56	0.662	0	0	0.7615	0.1935	0	0	0	0.5938	0	0	0	0.7059	0	0.5946	0.2162	0.1532	0.5766	0.1351	0.5405	0.6396	0.5676	0.1982	0	0.8793	0.1897	0.7241	0.5872	0.6095	0.6286	0.7353	0.2072	0.3836	0.875	0.2667	0.6224	0.506	61
DYNC1I2	Candidate gene	0.5676	0.211	0.2973	1	0.5644	0.56	0.169	0	0.7105	0.7615	0.8387	0	0.7857	0.6316	0.5938	0.641	0.5843	0	0.5882	0	0.5946	0.6847	0.1261	0.5766	0.3243	0.5405	0.6396	0.5676	0.6757	0	0	0	0	0.5872	0.6095	0	0.4559	0.6126	0.4795	0.5125	0.5238	0.6224	0.506	62
NDUFA3	Candidate gene	0.5766	0.7064	0.7027	0.3478	0.5644	0.56	0.662	0.5714	0.2895	0.2294	0.5806	0.5517	0.3571	0	0.5938	0.641	0.5843	0	0	0	0.5946	0.2162	0.7387	0.5766	0.8378	0.5405	0.6396	0.5676	0.1982	0	0.6379	0.7414	0.7414	0.5872	0.1714	0.1286	0.4559	0.6126	0.8082	0.9625	0.8286	0.0918	0	63
HERC5	Candidate gene	0.5856	0.3303	0.3514	0.7609	0.5644	0.56	0.662	0	0	0.3761	0.3871	0	0	0	0.5938	0	0.5843	0	0	0	0.5946	0.6577	0.3604	0.5766	0.2613	0.5405	0.6396	0.5676	0.7117	0	0.8276	0.9828	0.4483	0.5872	0.6095	0.6286	0.3824	0.6126	0.8493	0.525	0.3905	0.6224	0.506	64
UNC79	Candidate gene	0.5946	0.8073	0.7027	0.2935	0.5644	0.56	0	0	0	0.7615	0.1935	0	0	0	0.5938	0	0.5843	0	0.3333	0	0.5946	0.2162	0.2613	0.5766	0.2252	0.5405	0.6396	0.5676	0.1982	0	0	0	0	0.5872	0.6095	0.6286	0.9118	0.6126	0.7945	0.2375	0	0	0.506	65
THADA	Candidate gene	0.6036	0	0.7027	0.2174	0.5644	0.56	0.169	0	0	0.7615	0	0	0	0	0	0	0.0674	0	0	0	0.5946	0.6306	0.7387	0.5766	0.1351	0.5405	0.6396	0.5676	0.5766	0	0.8448	0.4828	0.4828	0.5872	0.6095	0.2143	0.3382	0.1441	0.5068	0.825	0.8952	0.6224	0.506	66
TTYH1	Candidate gene	0.6126	0.211	0.7027	0.8478	0.5644	0.56	0	0	0	0.7615	0	0	0	0	0.5938	0	0	0	0.7059	0	0.5946	0.2162	0.7387	0.5766	0.1351	0.5405	0.6396	0.5676	0.1982	0	0	0	0	0.5872	0.6095	0	0	0.2072	0	0	0.2667	0.6224	0	67
NGEF	Candidate gene	0.6306	0.211	0.3514	0.2609	0.5644	0.56	0.169	0	0	0.3486	0.8387	0	0.6905	0.6316	0.5938	0.641	0.5843	0	0.9608	0	0.5946	0.8829	0.2072	0.5766	0.6486	0.5405	0.6396	0.5676	0.8919	0	0	0	0	0.5872	0.6095	0	0.4118	0.6126	0.2877	0.15	0.3714	0	0.506	69
ABCA13	Candidate gene	0.6396	0.9083	0.7027	0	0.5644	0.56	0.169	0	0	0.422	0	0	0	0	0.5938	0	0.5843	0	0	0	0.5946	0.3964	0.2613	0.5766	0.8378	0.5405	0.6396	0.5676	0.4234	0	0	0	0	0.5872	0.6095	0.6286	0	0.1532	0.6575	0.3125	0.8762	0.6224	0.506	70
FANCC	Candidate gene	0.6486	0.3303	0.2613	0.1848	0.5644	0.56	0	0	0.7105	0.1743	0.8387	0	0	0.6316	0.5938	0.641	0.5843	0.6129	0.4118	0.6471	0.5946	0.7477	0.3964	0.5766	0.6396	0.5405	0.2162	0.5676	0.7658	0.9444	0.1552	0.8276	0.6724	0.5872	0.6095	0.6286	0.5294	0.6126	0.1507	0.8	0.9333	0.6224	0.506	71
ST14	Candidate gene	0.6577	0.9083	0.1441	0.6848	0.5644	0.56	0.662	0.5714	0.7105	0.422	0	0	0	0	0	0	0.5843	0.6129	0.5686	0.9412	0.5946	0.5135	0.7387	0.5766	0.6667	0.5405	0.6396	0.5676	0.7387	0.6944	0.7931	0.6897	0.931	0.5872	0.6095	0.6286	0.1618	0.6126	0.3699	0.4625	0.181	0.6224	0.506	72
GRID2	Candidate gene	0.6667	0.4495	0.7027	0.4565	0.5644	0.56	0.662	0.5714	0.7105	0.7615	0	0	0.7381	0	0.5938	0.641	0.5843	0	0.2549	0	0.5946	0.8829	0.3153	0.5766	0.8378	0.5405	0.6396	0.5676	0.8919	0	0.2241	0.1207	0.5172	0.5872	0.6095	0.6286	0.9118	0.1171	0.3151	0.3375	0.3429	0	0	73
EPHA6	Candidate gene	0.6757	0.9083	0.7027	0.4783	0.5644	0.56	0.662	0	0.2895	0.422	0	0	0.6905	0	0.5938	0.641	0.5843	0	0.902	0	0.5946	0.2162	0.7387	0.5766	0.8378	0.5405	0.6396	0.5676	0.4234	0	0	0	0	0.5872	0.6095	0.6286	0	0.6126	0.5616	0.925	0.3429	0.6224	0.506	74
INF2	Candidate gene	0.6847	0.1009	0.0631	0.4348	0.5644	0.56	0.169	0	0	0.7615	0	0	0	0	0	0	0	0.6129	0	0.9412	0.5946	0.3964	0.7387	0.5766	0.1802	0.5405	0.6396	0.5676	0.3243	0	0.3966	0.8966	0.9483	0.5872	0.6095	0.6286	0.6618	0.6126	0	0	0	0.6224	0.506	75
ZMAT4	Candidate gene	0.6937	0.9083	0.7027	0.7065	0.5644	0.56	0	0	0	0.7615	0	0	0	0	0	0	0.5843	0	0	0	0.5946	0.2162	0.7387	0.5766	0.8378	0.5405	0.6396	0.5676	0.1982	0	0.5517	0.6034	0.7069	0.5872	0.6095	0.6286	0.9118	0.6126	0.411	0.6	0.1714	0.6224	0.506	76
LENG9	Candidate gene	0.7027	0.9083	0.7027	0	0	0	0	0	0	0.7615	0	0	0	0	0	0	0	0	0	0	0.5946	0.2162	0.7387	0.5766	0.1351	0.5405	0.6396	0.5676	0.1982	0	0	0	0	0.0917	0	0	0	0.6126	0	0	0.0857	0.6224	0.506	77
TFPT	Candidate gene	0.7117	0.5872	0.7027	0.9457	0	0	0	0	0	0.7615	0	0	0	0	0	0	0.5843	0	0	0	0.5946	0.4595	0.7387	0.5766	0.4144	0.5405	0.1712	0.5676	0.5045	0	0	0	0	0.5872	0.6095	0	0	0.6126	0	0	0.6476	0.6224	0.506	78
CYP39A1	Candidate gene	0.7297	0.6514	0.2523	0.6413	0.5644	0.56	0.662	0	0.2895	0.7615	0.5806	0.8621	0.2143	0.6316	0.5938	0.641	0	0	0	0	0.5946	0.8829	0.7387	0.5766	0.8378	0.5405	0.6396	0.5676	0.8919	0	0.9138	0.4483	0.8621	0.5872	0.6095	0.6286	0.9118	0.6126	0.726	0.2625	0.4	0.6224	0.506	80
ZIC4	Candidate gene	0.8018	0.9083	0.7027	0.8696	0.5644	0.56	0.662	0	0	0.0459	0	0	0	0	0	0	0	0	0.5098	0	0.5946	0.8829	0.7387	0.5766	0.8378	0.5405	0.6396	0.5676	0.8919	0	0.5172	0.2069	0.431	0.5872	0.6095	0.6286	0	0.6126	0.8767	0.15	0.5619	0.6224	0.506	88
LENG9	Candidate gene	0.8108	0.9083	0.7027	0	0.5644	0.56	0.662	0	0	0.7615	0	0	0	0	0	0	0	0	0	0	0.5946	0.2162	0.7387	0.5766	0.1351	0.5405	0.6396	0.5676	0.1982	0	0	0	0	0.0917	0	0	0.9118	0.6126	0.4247	0.9375	0.0857	0.6224	0.506	89
TMPRSS5	Candidate gene	0.8198	0.9083	0.7027	0.8913	0.5644	0.56	0.662	0	0	0.7615	0	0	0	0	0	0	0.5843	0	0	0	0.5946	0.8829	0.7387	0.5766	0.8378	0.5405	0.6396	0.5676	0.8919	0	0.3793	0.2586	0.6552	0.0917	0.6095	0.6286	0.5588	0.6126	0.137	0.15	0.8857	0	0.506	90
CD320	Candidate gene	0.8288	0.3303	0.1441	0.7826	0.5644	0.56	0.662	0	0.7105	0.7615	0	0	0	0	0	0	0.5843	0.6129	0.549	0.6471	0.5946	0.1081	0.7387	0.5766	0.3063	0.5405	0.6396	0.5676	0.1982	0	0.8103	0.8103	0.7586	0.5872	0.6095	0.1286	0.1912	0.1261	0.9178	0.9	0.9905	0.6224	0.506	91
ANKFN1	Candidate gene	0.8378	0	0.7027	0	0.5644	0.56	0.169	0	0	0.7615	0	0	0	0	0	0	0.5843	0	0	0	0.5946	0.8829	0.7387	0.5766	0.8378	0.5405	0.6396	0.5676	0.8919	0	0	0	0	0.5872	0.6095	0.6286	0.9118	0.6126	0.4384	0.3875	0.2286	0.6224	0.506	92
RAB38	Candidate gene	0.8468	0.211	0.7027	0.8152	0.5644	0.56	0	0	0	0.2844	0	0	0	0.6316	0.5938	0	0.5843	0	0.9608	0.9412	0.5946	0.1081	0.4505	0.5766	0.3063	0.5405	0.1171	0.5676	0.3694	0	0.8966	0.069	1	0.5872	0.6095	0.0571	0.7794	0.6126	0.4658	0.95	0.4286	0.6224	0.506	93
COL28A1	Candidate gene	0.8559	0.211	0.7027	0	0.5644	0.56	0.662	0	0	0.7615	0.8387	0	0	0	0.5938	0	0.5843	0	0	0	0.5946	0.8829	0.7387	0.5766	0.8378	0.5405	0.6396	0.5676	0.8919	0	0	0	0	0.5872	0.6095	0	0	0.1081	0	0	0.5714	0	0.506	94
HERC6	Candidate gene	0.8649	0.211	0.3514	0.8804	0.5644	0.56	0.662	0	0	0.3486	0	0	0	0	0	0	0	0	0	0	0.5946	0.3964	0.2613	0.0901	0.1892	0.5405	0.6396	0.5676	0.4234	0	0.4138	0.931	0.8793	0.5872	0.6095	0.6286	0.9118	0.6126	0.9452	0.8875	0.9238	0.6224	0.506	95
ZNF804B	Candidate gene	0.8739	0.211	0.7027	0	0.5644	0.56	0.662	0	0	0	0.8387	0	0	0	0	0	0.5843	0	0	0	0.5946	0.8829	0.7387	0.5766	0.8378	0.5405	0.6396	0.5676	0.8919	0	0	0	0	0.5872	0	0.0571	0	0.6126	0.2466	0.8625	0.8952	0	0	96
CERS4	Candidate gene	0.8829	0.211	0.7027	0.5	0.5644	0.56	0.662	0	0.7105	0.7615	0.5806	0	0	0	0.5938	0.641	0.5843	0	0	0	0.5946	0.8829	0.7387	0.5766	0.8378	0.5405	0.6396	0.5676	0.8919	0	0.9483	0.569	0.9138	0.5872	0.6095	0.2143	0.1912	0.6126	0.8219	0.4625	0	0	0.506	97
KIAA1324L	Candidate gene	0.8919	0.9083	0.7027	0	0.5644	0	0.662	0	0	0.7615	0	0	0	0	0	0	0.5843	0	0	0	0.5946	0.8829	0.7387	0.5766	0.8378	0.5405	0.6396	0.5676	0.8919	0	0	0	0	0.5872	0.6095	0	0.6029	0.6126	0.9041	0.2875	0.2286	0.6224	0.506	98
MANBAL	Candidate gene	0.9009	0.9083	0.7027	0	0.5644	0.56	0.662	0	0	0.7615	0	0	0	0	0	0	0	0	0	0	0.5946	0.5135	0.7387	0.5766	0.8378	0.5405	0.6396	0.5676	0.4234	0	0	0	0	0.5872	0.6095	0	0	0.6126	1	0.6	0.5905	0.6224	0.506	99
VWC2	Candidate gene	0.9099	0.9083	0.7027	0	0.5644	0.56	0.662	0	0	0.7615	0	0	0	0	0	0	0	0	0	0	0.5946	0.8829	0.7387	0.5766	0.8378	0.5405	0.6396	0.5676	0.8919	0	0	0	0	0.1193	0	0.6286	0.9118	0.6126	0	0.5375	0.7333	0.6224	0.506	100
ZBTB44	Candidate gene	0.9189	0.9083	0.7027	0	0.5644	0.56	0	0	0	0.5138	0	0	0	0	0	0	0	0	0	0	0.5946	0.8829	0.3423	0.0901	0.3063	0.5405	0.6396	0.5676	0.8919	0	0.2931	0.9655	0.7759	0.5872	0.6095	0.6286	0.6324	0.6126	0	0.75	0.9143	0.0918	0.506	101
AK8	Candidate gene	0.9279	0.211	0.3514	0	0.5644	0.56	0	0.5714	0.7105	0.7615	0	0	0	0	0	0	0.5843	0	0.9608	0	0.5946	0.8829	0.7387	0.5766	0.8378	0.5405	0.6396	0.5676	0.8919	0	0	0	0	0.5872	0.6095	0	0.4118	0.6126	0.6301	0.8	0	0	0.506	102
PRDM10	Candidate gene	0.9369	0.9083	0.7027	0.6522	0.5644	0.56	0.169	0	0	0.7615	0	0	0	0	0	0	0.5843	0	0	0	0.5946	0.3514	0.7387	0.5766	0.8378	0.5405	0.6396	0.5676	0.3694	0	0.3276	0.9138	0.9828	0.156	0.6095	0.6286	0.4118	0.6126	0.9589	0.6875	0.3619	0.0918	0.506	103
ANKK1	Candidate gene	0.9459	0.9083	0.7027	0	0.5644	0.56	0	0	0.7105	0.7615	0	0	0	0	0	0	0.0674	0.6129	0	0	0.5946	0.8829	0.7387	0.5766	0.8378	0.5405	0.6396	0.5676	0.8919	0	0	0	0	0.5872	0.6095	0.6286	0	0.6126	0.2603	0.4625	0.981	0.6224	0.506	104
AASDH	Candidate gene	0.955	0.9083	0.7027	0	0.5644	0.56	0	0	0.7105	0.7615	0	0	0	0	0	0	0	0	0	0	0.5946	0.8829	0.7387	0.5766	0.8378	0.5405	0.6396	0.5676	0.8919	0	0	0	0	0.5872	0.6095	0.6286	0.6324	0.6126	0.7671	0.8	0.9333	0.6224	0.506	105
CLDN25	Candidate gene	0.964	0.9083	0.7027	0	0.5644	0.56	0.662	0	0	0.7615	0	0	0	0	0.0938	0	0	0	0	0	0.5946	0.8829	0.7387	0.5766	0.8378	0.5405	0.6396	0.5676	0.8919	0	0	0	0	0	0	0	0	0.6126	0	0	0	0	0	106
PKD1L1	Candidate gene	0.973	0.789	0.7027	0	0.5644	0.56	0.662	0	0	0.7615	0	0	0	0	0	0	0.5843	0	0.4314	0	0.5946	0.8829	0.7387	0.5766	0.8378	0.5405	0.6396	0.5676	0.8919	0	0	0	0	0.5872	0.6095	0.2143	0.9118	0.6126	0.9315	0.6625	0.9524	0.6224	0.506	107
OR4P4	Candidate gene	0.982	0.9083	0.7027	0	0.5644	0.56	0.662	0	0	0	0.8387	0	0	0	0	0.641	0	0	0	0	0.5946	0.8829	0.7387	0.5766	0.8378	0.5405	0.6396	0.5676	0.8919	0	0	0	0	0	0	0	0	0.6126	0.8356	1	0.7524	0	0	108
ZPBP	Candidate gene	0.991	0.211	0.7027	0.7283	0.5644	0.56	0.662	0	0	0.7615	0	0	0	0	0	0	0	0	0.9608	0	0.5946	0.8829	0.7387	0.5766	0.8378	0.5405	0.6396	0.5676	0.8919	0.9722	0.9828	0.1379	0.9655	0.5872	0.6095	0.6286	0.9118	0.6126	0.7534	0.2625	0.2095	0	0.506	109
PRM1	Candidate gene	1	0.9083	0.7027	0.7391	0.5644	0.56	0.662	0	0	0.7615	0	0	0	0	0	0	0.0674	0	0	0	0.1532	0.8829	0.7387	0.5766	0.8378	0.5405	0.6396	0.5676	0.8919	0.9167	1	0.3966	0.7931	0.5872	0.6095	0.6286	0.9118	0.6126	0	0.8375	1	0	0.506	110
