# Supplementary material for: Genome-Wide Signatures of Selection Reveal Genes Associated With Performance in American Quarter Horse Subpopulations
Source: Front Genet. 2018 Jul 19;9:249. doi: 10.3389/fgene.2018.00249 (PMC6060370; doi:10.3389/fgene.2018.00249)
Supplement: Supplementary Table 6 — Genes identified by Endeavor using the central nervous system seed gene list in all 6 QH subpopulations ranked by p-value. Each column on the table corresponds to a human-based data source used by Endeavor-GW to rank the provided list of genes based on the seed genes. These are: gene and protein function, chemical information, biomolecular pathways, phenotypic information, interaction networks, expression profiles, expression ontologies, and sequence-based features. [file Table_6.XLSX]

## Sheet: Cutting_CNS
Gene name	Group	P-value	Annotation â€“ Gene Ontology	Annotation â€“ UniProt	Text-mining	Annotation â€“ InterPro	Annotation â€“ Pfam	Annotation â€“ SIMAP (localization)	Annotation â€“ DrugBank	Annotation â€“ Stitch	Annotation â€“ RGD ChEBI	Annotation â€“ Reactome	Annotation â€“ WikiPathways	Annotation â€“ RGD pathways	Annotation â€“ BioCarta	Annotation â€“ CPDB	Annotation â€“ hiPathDB	Annotation â€“ GAD	Annotation â€“ OMIM	Annotation â€“ RGD MP	Annotation â€“ RGD RDO	Interaction â€“ String	Interaction â€“ BioGrid	Interaction â€“ I2D	Interaction â€“ IntAct	Interaction â€“ iRefIndex	Interaction â€“ Mint	Interaction â€“ HPRD	Interaction â€“ MIPS	Interaction â€“ GeneRIF	Expression â€“ Su et al (2002)	Expression â€“ Su et al (2004)	Expression â€“ CMAP	Expression â€“ Lukk et al	Annotation â€“ PaGenBase	Annotation â€“ CGAP	Annotation â€“ GNF	Annotation â€“ eGenetics	Blast	Precalculated â€“ Ouzounis	Precalculated â€“ Prospectr	Precalculated â€“ HaploPred	Annotation â€“ Aura	Annotation â€“ mirZ	id
GRIN1	Training gene	0.0074	0.0887	0.2963	0.0194	0.032	0.0083	0.1313	0.1053	0.209	0.0538	0.1373	0.0909	0.1026	0.1351	0.0933	0.2041	0.0538	0.1333	0.0462	0.0952	0.0741	0.037	0.0444	0.0296	0.0444	0.0222	0.037	0.0148	0.0444	0.0517	0.0588	0.0118	0.0235	0.0373	0.5	0.6552	0.5047	0.0296	0.1339	0.2222	0.5161	0.0565	0.0379	0
BDNF	Training gene	0.0148	0.0242	0.0519	0.0097	0.048	0.0667	0.1313	0	0.0149	0.0077	0	0.1515	0.0769	0.0811	0.0267	0.3265	0.0108	0.0333	0.2	0.119	0.0222	0.037	0.0444	0.0296	0.0444	0.0222	0.037	0.5111	0.0444	0.0862	0.2118	0.1294	0.2471	0.2687	0.5	0.2328	0.5047	0.0296	0.0268	0.5238	0.0403	0.5403	0.0606	1
NPY	Training gene	0.0222	0.0161	0.0074	0.0291	0.064	0.0583	0.1313	0.2632	0.5075	0.0154	0.0196	0	0.1282	0	0.0133	0.1224	0.0215	0	0.0769	0.0238	0.0074	0.037	0.0444	0.0296	0.0444	0.0222	0.037	0.5111	0.0444	0.1034	0.4588	0.0706	0.0941	0.0075	0.5	0.6466	0.5047	0.0815	0.0357	0.5079	0.1694	0.5403	0.5379	2
GRM1	Training gene	0.0296	0.0403	0.2963	0.0777	0.016	0.0167	0.1313	0.1579	0.1642	0.0923	0.098	0.0606	0.0256	0.1622	0.0533	0.1837	0.0968	0.1	0.0154	0.2857	0.0667	0.037	0.0444	0.5852	0.0444	0.0222	0.037	0.5111	0.0444	0.1379	0.0941	0.0235	0.0353	0.2537	0.5	0.2328	0.5047	0.0296	0.0179	0.2222	0.4677	0.5403	0.5379	3
CXCL12	Training gene	0.037	0.121	0.037	0.0874	0.096	0.075	0.4747	0.3158	0.194	0.0769	0.0588	0.2121	0.4615	0.027	0.1467	0.1633	0.1075	0.2	0	0.1667	0.0963	0.037	0.0444	0.0296	0.0444	0.0222	0.037	0.5111	0.0444	0.1207	0.6	0.1647	0.2235	0.0149	0.5	0.0259	0.5047	0.0667	0.0536	0.6746	0.1452	0.0242	0.0152	4
GAL	Training gene	0.0444	0.0081	0.0222	0.0388	0.04	0.025	0.1313	0	0.1493	0.0615	0.0196	0	0	0.1892	0.0667	0.102	0.0645	0	0.0308	0.0476	0.0074	0.037	0.0444	0.5852	0.0444	0.5259	0.037	0.5111	0.0444	0.2931	0.3882	0.1412	0.1647	0.0522	0.5	0.2328	0.5047	0.0741	0.3125	0.5079	0.1371	0.5403	0.5379	5
LTB	Training gene	0.0519	0.0323	0.0444	0.0485	0.008	0.0333	0.1313	0	0	0.1538	0	0	0.2051	0	0.12	0.0408	0.1613	0	0.1077	0	0.6074	0.037	0.0444	0.0296	0.0444	0.5259	0.037	0.0148	0.0444	0.1724	0.7765	0.0588	0.1176	0.291	0.5	0	0	0.0296	0	0	0.8065	0.5403	0.0379	6
TFRC	Training gene	0.0593	0.1935	0.0667	0.1165	0.072	0.05	0.303	0	0.2985	0.0231	0.2353	0.1818	0.7692	0.0541	0.1733	0.1429	0.1183	0	0.0923	0.5	0.1037	0.037	0.0444	0.0296	0.0444	0.0222	0.037	0.0148	0.0444	0.069	0.8353	0.2588	0.1294	0.1716	0.5	0.0086	0.5047	0.0296	0.9018	0.5397	0.371	0.0081	0.5379	7
CYP2D6	Training gene	0.0667	0.7177	0.1852	0.0583	0.056	0.5417	0.1313	0.0526	0.4925	0.0385	0.1569	0.1212	0.4872	0.1081	0.28	0.2857	0.0323	0.0667	0	0.4286	0.1778	0.037	0.0444	0.5852	0.0444	0.5259	0.5852	0.5111	0.0444	0.2241	0	0	0	0.291	0.5	0	0.5047	0.0296	0.0893	0.1667	0	0	0.5379	8
KIF5C	Training gene	0.0741	0.371	0.7111	0.0971	0.088	0.0833	0.8788	0	0	0.1308	0	0	0	0	0.6533	0	0.4624	0	0.2769	0	0.6074	0.037	0.0444	0.0296	0.0444	0.5259	0.037	0.5111	0.0444	0	0.1765	0.3176	0.0118	0.0224	0.5	0.5776	0	0.0296	0.5179	0.3175	0.0968	0.0565	0.0152	9
GAD1	Candidate gene	0.0815	0.2097	0.1852	0.1262	0.552	0.5417	0.4747	0.2105	0.0299	0.0692	0.2549	0.6364	0.2821	0	0.2933	0.6735	0.086	0.6	0.1538	0.4762	0.0296	0.3259	0.1704	0.5852	0.4815	0.5259	0.1111	0.5111	0.3926	0.0172	0.2824	0.5294	0.1529	0.0672	0.5	0.6207	0.5047	0.5852	0.2946	0.1984	0.0242	0.5403	0.5379	10
TNFSF4	Training gene	0.0889	0.1855	0.0593	0.068	0.024	0.0333	0.303	0	0.4627	0.1	0	0	0	0	0.6533	0.0408	0.129	0.1667	0.3692	0.6905	0.1778	0.8222	0.0444	0.5852	0.0444	0.5259	0.037	0.5111	0.0444	0.1552	0.1529	0.1059	0.2588	0.3209	0.5	0.2328	0.5047	0.0593	0.7768	0.9762	0.621	0.5403	0.5379	11
ERBB3	Candidate gene	0.0963	0.1694	0.0815	0.1845	0.552	0.5417	0.1313	0	0.2388	0.2308	0.1765	0.6364	0.7436	0.5946	0.2	0.2245	0.2043	0.6	0.1231	0.5238	0.0815	0.637	0.2741	0.1556	0.5185	0.5259	0.5852	0.5111	0.6667	0.5172	0.2471	0.7647	0.5529	0.6642	0.5	0.5345	0.5047	0.1556	0.0625	0.0556	0.0081	0.5403	0.5379	12
CLSTN1	Candidate gene	0.1037	0.4919	0.3926	0.7282	0.552	0.5417	0.1313	0	0	0.3077	0	0	0	0	0	0	0	0	0	0	0.6074	0.237	0.3111	0.5852	0.3926	0.5259	0.1556	0.5111	0.2815	0.0345	0.1882	0.6471	0.2706	0.2239	0.5	0.6207	0.5047	0.5852	0.2143	0.2222	0.1048	0.5403	0.5379	13
CNR1	Candidate gene	0.1111	0.0806	0.1852	1	0.552	0.5417	0.303	0.6842	0.7612	0.0462	0.0784	0.6364	0.3333	0.5946	0.1333	0.2653	0.043	0	0.0615	0.1429	0.0296	0.8222	0.3111	0.5852	0.7926	0.5259	0.5852	0.5111	0.837	0.2586	0.0824	0.0353	0.1412	0.2015	0.5	0.5948	0	0.5852	0.0089	0.8333	0.3145	0.5403	0.5379	14
SLC25A12	Candidate gene	0.1185	0.5887	0.7111	0.3495	0.552	0.5417	0	0.6842	0.7612	0.7923	0.7059	0	0	0	0.6533	0.6735	0.2473	0.6	0.2308	0.3333	0.6074	0.3704	0.1556	0.1407	0.437	0.5259	0.5852	0.5111	0.3778	0.5517	0.0118	0.5882	0.5882	0.6642	0.5	0.5	0.5047	0.5852	0.1161	0.1429	0.5242	0.5403	0.5379	15
PIP4K2A	Candidate gene	0.1259	0.2419	0.1852	0.1359	0.552	0.5417	0	0	0.3881	0.1385	0.7059	0.6364	0.4103	0.5946	0.2267	0.6735	0.2688	0	0	0	0.6074	0.2815	0.237	0.0741	0.237	0.5259	0.5852	0.5111	0.4148	0.569	0.7294	0.5647	0.2824	0.209	0.5	0.6207	0.5047	0.5852	0.7411	0.3333	0.7823	0.5403	0.0606	16
TLK1	Candidate gene	0.1333	0.5323	0.7111	0.6796	0.552	0.5417	0.6566	0	0	0.7692	0	0.6364	0	0	0.6533	0	0.6237	0	0	0	0.6074	0.4	0.3556	0.5852	0.4593	0.5259	0.5852	0.5111	0.4519	0.5345	0.1412	0.3059	0.4824	0.6642	0.5	0.5	0.5047	0.5852	0	0.4921	0.3952	0.5403	0.5379	17
NFE2L2	Candidate gene	0.1407	0.4758	0.1852	0.2816	0.552	0.5417	0.8788	0	0.7612	0.0308	0	0.6364	0.6667	0.5946	0.6533	0.6735	0.1935	0	0.1385	0.5952	0.6074	0.4593	0.2889	0.5852	0.3704	0.5259	0.5852	0.5111	0.5333	0.6379	0.5529	0.4353	0.4471	0.6642	0.5	0.8276	0	0.5852	0.2768	0.5397	0.1855	0.5403	0.5379	18
RIMS1	Candidate gene	0.1481	0.3065	0.1852	0.3786	0.552	0.5417	0.4747	0	0.2239	0.5	0.2549	0	0	0.5946	0.2667	0.6735	0.2366	0.6	0.6154	0.8571	0.1185	0.8222	0.2074	0.5852	0.5556	0.5259	0.5852	0.5111	0.6296	0.9483	0.3412	0.3412	0.0824	0.2761	0.5	0.5	0.5047	0.5852	0.1607	0.6825	0.2177	0.0565	0.5379	19
RIF1	Candidate gene	0.1556	0.0968	0.7111	0.6893	0.552	0.5417	0	0	0	0.6462	0	0	0	0	0	0	0.6022	0	0.5231	0	0.6074	0.6222	0.4148	0.5852	0.5852	0.5259	0.5852	0.5111	0.6	0.3966	0.5412	0.8471	0.3176	0.6642	0.5	0.2328	0.5047	0.5852	0.5893	0.4127	0.1613	0.0565	0.5379	20
IL18	Candidate gene	0.163	0.0726	0.0296	0.1068	0.552	0.5417	0.6566	0	0.3134	0.0846	0.7059	0.6364	0.3077	0.5946	0.08	0.0408	0.0753	0	0.1692	0.0714	0.0593	0.3556	0.7259	0.5852	0.437	0.5259	0.5852	0.5111	0.4963	0.8276	0.7412	0.8353	0.7529	0.6642	0.5	0.5	0.5047	0.5852	0.1429	0.873	0.9839	0.5403	0.5379	21
GORASP2	Candidate gene	0.1704	0.6532	0.1852	0.8155	0.552	0.5417	0	0	0	0.3538	0.7059	0	0	0	0.6533	0	0.6022	0	0	0	0.6074	0.5926	0.3852	0.5852	0.5407	0.5259	0.163	0.5111	0.5926	0.4483	0.4353	0.2471	0.2941	0.6642	0.5	0.8276	0.5047	0.5852	0.2857	0.4127	0.5484	0.5403	0.5379	22
PIK3CD	Candidate gene	0.1778	0.1371	0.7111	0.1553	0.552	0.5417	0	0.6842	0.4776	0.2154	0.1765	0.6364	0.7179	0	0.2133	0.2449	0.8495	0	0.2923	0.8571	0.0519	0.363	0.2222	0.5852	0.3556	0.5259	0.1407	0.5111	0.4519	0.5862	0.8941	0.7529	0.1882	0.291	0.5	0.8276	0.5047	0.5852	0.375	0.1032	0.121	0.5403	0.0152	23
UBE4B	Candidate gene	0.1852	0.3468	0.1852	0.699	0.552	0.5417	0.6566	0	0	0.7077	0	0	0.6667	0.5946	0.6533	0	0.7097	0	0.1846	0	0.6074	0.5852	0.4222	0.5852	0.4815	0.5259	0.5852	0.5111	0.637	0.7759	0.0353	0.3294	0.7294	0.6642	0.5	0.8276	0.5047	0.5852	0.3839	0.6587	0.4113	0.5403	0.5379	24
TNFAIP6	Candidate gene	0.1926	0.3226	0.2963	0.5049	0.552	0.5417	0.4747	0	0.0746	0.2923	0	0	0	0	0	0	0.1398	0	0.8462	0	0.6074	0.2074	0.7259	0.5852	0.2074	0.5259	0.5852	0.5111	0.2815	0.9138	0.5647	0.4	0.6941	0.6642	0.5	0.2328	0.5047	0.5852	0.2411	0.0556	0.0887	0.5403	0.5379	25
EIF2B3	Candidate gene	0.2	0.2903	0.7111	0.4175	0.552	0.5417	0	0	0.7612	0.7385	0.7059	0.6364	0	0.5946	0.6533	0.6735	0.9247	0.6	0	0.2381	0.6074	0.6074	0.3556	0.5852	0.437	0.5259	0.5852	0.5111	0.6148	0	0.2706	0.7059	0.4235	0.6642	0.5	0.2328	0.5047	0.5852	0.0804	0.7063	0.2339	0.5403	0.5379	26
SCN1A	Candidate gene	0.2074	0.129	0.7111	0.6214	0.552	0.5417	0.303	0.6842	0.7612	0.4	0.7059	0	0	0	0.6533	0	0.2151	0.6	0.4462	0.4524	0.6074	0.8222	0.163	0.5852	0.7926	0.5259	0.5852	0.5111	0.837	0	0.3529	0.2824	0.0471	0.2239	0.5	0.5	0.5047	0.5852	0.0982	0.0794	0.6048	0.5403	0.5379	27
SPSB1	Candidate gene	0.2148	0.5323	0.1852	0.6699	0.552	0.5417	0	0	0	0.3692	0.7059	0	0	0	0.6533	0	0.4516	0	0	0	0.6074	0.4444	0.7259	0.5852	0.4074	0.5259	0.5852	0.5111	0.4296	0	0.1176	0.9529	0.6118	0.6642	0.5	0.2328	0.5047	0.5852	0.4286	0.1429	0.2419	0.5403	0.5379	28
ACOT7	Candidate gene	0.2222	0.879	0.1852	0.4369	0.552	0.5417	0.4747	0	0.7612	0.1923	0	0	0	0	0.6533	0.6735	0.6344	0	0	0	0.6074	0.5778	0.2593	0.5852	0.3111	0.5259	0.5852	0.5111	0.4815	0.1897	0.2235	0.4471	0.2353	0.097	0.5	0.6207	0.5047	0.5852	0.4911	0.4127	0.9355	0.0565	0.5379	29
BMP3	Candidate gene	0.2296	0.0645	0.0148	0.2913	0.552	0.5417	0.4747	0	0.7612	0.2769	0	0.6364	0	0	0.04	0	0.5054	0	0.8	0.8571	0.6074	0.8222	0.7259	0.5852	0.7926	0.5259	0.5852	0.5111	0.837	0.4828	0.2353	0.2706	0.7882	0.2463	0.5	0.2328	0.5047	0.5852	0.1518	0.246	0.3871	0.5403	0.5379	30
DLAT	Candidate gene	0.237	0.879	0.1852	0.5146	0.552	0.5417	0.6566	0.6842	0.3881	0.2615	0.7059	0.6364	0.8205	0	0.6533	0.6735	0.7312	0.6	0	0.3333	0.1333	0.5259	0.3407	0.1333	0.2889	0.5259	0.5852	0.5111	0.5704	0.3793	0.7647	0.1176	0.3294	0.6642	0.5	0.8276	0.5047	0.5852	0.2679	0.1825	0.0726	0.5403	0.5379	31
TTYH1	Candidate gene	0.2444	0.7339	0.7111	0.9126	0.552	0.5417	0.3636	0	0	0.6692	0.3725	0	0	0	0.6533	0	0	0	0.6462	0	0.6074	0.1259	0.1111	0.5852	0.1333	0.5259	0.5852	0.5111	0.1333	0	0.4471	0.1882	0.0588	0.0672	0.5	0.6207	0.5047	0.5852	0.3304	0.9127	0.3548	0.5403	0.5379	32
CLTA	Candidate gene	0.2519	0.4355	0.7111	0.3398	0.552	0.5417	0.8788	0	0.2537	0.3231	0.2157	0	0.0513	0.5946	0.1867	0.3061	0.9247	0	0	0	0.6074	0.3185	0.2	0.163	0.3259	0.5259	0.1259	0.5111	0.3259	0.6552	0.6824	0.5059	0.4118	0.6642	0.5	0.4569	0.5047	0.5852	0.5357	0.8492	0.7177	0.5403	0.5379	33
ZNF292	Candidate gene	0.2593	0.3952	0.1852	0	0.552	0.5417	0.8788	0	0	0.4692	0	0	0	0	0	0	0.3333	0	0	0	0.6074	0.2074	0.7259	0.5852	0.1926	0.5259	0.5852	0.5111	0.2222	0.7241	0.5882	0.4588	0.5647	0.6642	0.5	0.8276	0.5047	0.5852	0	0.5714	0.0323	0.5403	0.5379	34
SLC17A8	Candidate gene	0.2667	0.4435	0.7111	0	0.552	0.5417	0.303	0	0.7612	0.1846	0.3725	0	0.1538	0	0.16	0.6735	0.6559	0.6	0.5077	0.5714	0.1111	0.8222	0.7259	0.5852	0.7926	0.5259	0.5852	0.5111	0.837	0	0	0	0	0.097	0.5	0.2328	0.5047	0.5852	0.5446	0.1032	0.7177	0.5403	0.5379	35
GNE	Candidate gene	0.2741	0.6532	0.1852	0.7767	0.552	0.5417	0.6566	0	0.3881	0.5769	0	0	0.5641	0	0.6533	0	0.5376	0.6	0.5692	0.5476	0.6074	0.4444	0.7259	0.5852	0.2667	0.5259	0.5852	0.5111	0.5111	0.6724	0.4	0.7176	0.9765	0.6642	0.5	0.8276	0.5047	0.5852	0.0714	0.6587	0.3065	0.5403	0.5379	36
C12orf29	Candidate gene	0.2815	0	0.7111	0	0	0	0	0	0.7612	0	0	0	0	0	0	0	0	0	0	0	0.6074	0.1259	0.7259	0.5852	0.1333	0.5259	0.5852	0.5111	0.1333	0.5	0.3765	0.3529	0.7647	0.6642	0.5	0.5603	0.5047	0.5852	0.6875	0.4127	0.5887	0.5403	0.5379	37
PDHX	Candidate gene	0.2889	0.879	0.1852	0.5922	0.552	0.5417	0.6566	0	0.3881	0.3385	0.7059	0.6364	0.8205	0.5946	0.6533	0.6735	0.172	0.6	0	0	0.1407	0.5259	0.2815	0.5852	0.4074	0.5259	0.5852	0.5111	0.5852	0.4138	0.0706	0.2118	0.6235	0.6642	0.5	0.8276	0.5047	0.5852	0.0446	0.4127	0.9677	0.5403	0.5379	38
CTNNBIP1	Candidate gene	0.2963	0.1532	0.1852	0.2718	0.552	0.5417	0	0	0.7612	0.6923	0	0	0.359	0.5946	0.6533	0.6735	0	0	0.3846	0	0.6074	0.4222	0.2963	0.5852	0.3556	0.5259	0.1333	0.5111	0.3407	0.6897	0.6235	0.9647	0.5412	0.306	0.5	0	0	0.5852	0.25	0.9921	0.6694	0.0161	0.5379	39
OLFML1	Candidate gene	0.3037	0.4113	0.3259	0	0.552	0.5417	0.4747	0	0	0.2538	0	0	0	0	0	0	0	0	0	0	0.2074	0.8222	0.7259	0.5852	0.7926	0.5259	0.5852	0.5111	0.837	0.3103	0.3176	0.0941	0.5059	0.6642	0.5	0.2328	0.5047	0.5852	0.8036	0.2778	0.5403	0.5403	0.5379	40
NPAS2	Candidate gene	0.3111	0.0484	0.7111	0.1456	0.552	0.5417	0.8788	0	0.7612	0.4231	0.7059	0	0	0.5946	0.6533	0.6735	0.2581	0	0.3538	0	0.6074	0.8222	0.7259	0.0593	0.7926	0.5259	0.5852	0.5111	0.837	0.2069	0.0471	0.4706	0.3412	0.6642	0.5	0.5862	0.5047	0.1481	0.4643	0.754	0.6532	0.5403	0.5379	41
FRAS1	Candidate gene	0.3185	0.6532	0.3926	0.7573	0.552	0.5417	0.1313	0	0	0.1615	0	0	0	0	0	0	0.8172	0.6	0.7385	0.8571	0.6074	0.1259	0.7259	0.5852	0.1333	0.5259	0.5852	0.5111	0.1333	0	0.1059	0.6	0.3765	0.6642	0.5	0.5345	0.5047	0.1704	0.9643	0.0159	0.2097	0.5403	0.5379	42
NR1H4	Candidate gene	0.3259	0.1129	0.1852	0.2136	0.552	0.5417	0.8788	0.6842	0.7612	0.2077	0.7059	0.6364	0.6667	0.5946	0.6533	0.6735	0.4086	0	0.3077	0.7381	0.6074	0.6296	0.3704	0.1037	0.5481	0.5259	0.1037	0.5111	0.6519	0.8966	0.3647	0.4118	0.8824	0.6642	0.5	0.8276	0.5047	0.5852	0.2232	0.1032	0.2258	0.5403	0.5379	43
TIMP2	Candidate gene	0.3333	0.1048	0.0815	0.233	0.552	0.5417	0.4747	0	0.0746	0.1077	0.7059	0.6364	0	0.5946	0.6533	0.6735	0.1505	0	0.3385	0.1905	0.0815	0.8222	0.3556	0.5852	0.3852	0.5259	0.1111	0.5111	0.4519	0.9828	0.9882	0.9059	0.5294	0.6642	0.5	0.8276	0.5047	0.5852	0.1071	0.1587	0.5323	0.5403	0.5379	44
SRSF10	Candidate gene	0.3407	0.6532	0.7111	0.7864	0.552	0.5417	0.6566	0	0	0.3154	0	0.2121	0.8974	0	0.3067	0	0	0	0.6	0	0.6074	0.4963	0.1852	0.1185	0.1852	0.5259	0.0889	0.5111	0.4889	0	0	0	0	0.6642	0.5	0.2328	0.5047	0.5852	0	0.627	0	0	0.5379	45
SSB	Candidate gene	0.3481	0.879	0.3407	0.4951	0.552	0.5417	0.8788	0	0.1343	0.5692	0	0	0.2308	0.5946	0.6533	0.6735	0	0	0.9385	0	0.1259	0.3778	0.3333	0.1259	0.3037	0.0519	0.5852	0.5111	0.4074	0.3621	0.8588	0.2353	0.2118	0.6642	0.5	0.8276	0.5047	0.5852	0.7143	0.4127	0.0161	0.5403	0.5379	46
DLAT	Candidate gene	0.3556	0.879	0.1852	0.5146	0.552	0	0	0.6842	0	0.2615	0	0.6364	0.8205	0	0.6533	0.6735	0.7312	0.6	0	0.3333	0.6074	0.5259	0.1333	0.0667	0.2889	0.5259	0.5852	0.5111	0.5704	0	0	0	0	0.6642	0.5	0	0	0.5852	0	0	0.0726	0.5403	0.5379	47
KLHL23	Candidate gene	0.363	0	0.7111	0	0.552	0.5417	0	0	0	0.3	0	0	0	0	0	0	0	0	0	0	0.6074	0.5037	0.7259	0.5852	0.7926	0.5259	0.5852	0.5111	0.5333	0.7931	0.3294	0.4824	0.6353	0.6642	0.5	0.2328	0.5047	0.5852	0	0	0.629	0.5403	0.5379	48
LUC7L	Candidate gene	0.3704	0.879	0.7111	0.3204	0.552	0.5417	0.8788	0	0.0746	0.3615	0	0	0	0	0	0	0	0	0.8769	0	0.6074	0.6	0.3852	0.5852	0.4741	0.5259	0.5852	0.5111	0.3704	0	0.4118	0.8235	0.8706	0.2612	0.5	0.8276	0.5047	0.5852	0.5625	0.4921	0.2581	0.5403	0.0152	49
NMNAT1	Candidate gene	0.3778	0.4839	0.1852	0.6505	0.552	0.5417	0	0.6842	0.3881	0.4923	0.7059	0	0.5641	0.5946	0.6533	0.6735	0.9247	0.6	0.7538	0	0.1556	0.1926	0.7259	0.5852	0.3333	0.5259	0.5852	0.5111	0.2222	0	0	0	0	0.6642	0.5	0.2328	0	0.5852	0.9286	0.4127	0.7339	0.5403	0.5379	50
CPEB4	Candidate gene	0.3852	0.879	0.7111	0.1748	0.552	0.5417	0	0	0	0.4615	0	0	0	0	0	0	0.3011	0	0	0	0.6074	0.8222	0.1333	0.5852	0.7926	0.5259	0.5852	0.5111	0.837	0	0	0	0	0.6642	0.5	0.8276	0.5047	0.5852	0.1696	0.0079	0.129	0.5403	0.5379	51
SLC1A5	Candidate gene	0.3926	0.6532	0.7111	0.6019	0.552	0.5417	0.1313	0.6842	0	0.1462	0.3725	0	0	0.5946	0.6533	0.6735	0.8925	0	0	0	0.6074	0.4222	0.3259	0.1481	0.1778	0.5259	0.5852	0.5111	0.4519	0.2414	0.9412	0.7412	0.3529	0.6642	0.5	0.8276	0	0.5852	0.3214	0.1032	0.4919	0.5403	0.5379	52
H6PD	Candidate gene	0.4	0.5726	0.3926	0.3689	0.552	0.5417	0.4747	0.6842	0.7612	0.2385	0	0	0.5641	0	0.6533	0.6735	0.4409	0.6	0.4769	0.381	0.2	0.1259	0.7259	0.5852	0.7926	0.5259	0.5852	0.5111	0.1333	0.8621	0.4824	0.6824	0.9059	0.6642	0.5	0.8276	0	0.5852	0.1964	0.246	0.7419	0.5403	0.5379	53
CWC22	Candidate gene	0.4074	0.879	0.7111	0.3883	0.552	0.5417	0	0	0.7612	0.4154	0	0	0	0	0	0	0.2796	0	0	0	0.6074	0.2815	0.4296	0.5852	0.5037	0.5259	0.5852	0.5111	0.3556	0	0	0	0	0.6642	0.5	0.8276	0.5047	0.5852	0.4375	0.1825	0	0.5403	0.5379	54
CYBRD1	Candidate gene	0.4148	0.7097	0.7111	0.3592	0.552	0.5417	0.1313	0	0.7612	0.6538	0.3137	0	0	0	0.6533	0	0.3871	0	0.6923	0	0.0444	0.8222	0.7259	0.5852	0.7926	0.5259	0.5852	0.5111	0.837	0	0.9294	0.6118	0.4	0.6642	0.5	0.0086	0.5047	0.5852	0.7679	0.0556	0.871	0.5403	0.5379	55
CSMD2	Candidate gene	0.4222	0.879	0.3556	0	0.552	0.5417	0.3636	0	0	0.8846	0	0	0	0	0	0	0.3441	0	0	0	0.6074	0.8222	0.2593	0.5852	0.2667	0.5259	0.5852	0.5111	0.837	0	0	0	0	0.6642	0.5	0.2328	0.5047	0.5852	0.125	0.0317	0.25	0.5403	0.5379	56
MYO3B	Candidate gene	0.4296	0.2016	0.7111	0	0.552	0.5417	0	0	0	0.8923	0	0	0	0	0	0	0.6774	0	0	0	0.6074	0.1778	0.0963	0.1037	0.7926	0.5259	0.5852	0.5111	0.1926	0	0	0	0	0.6642	0.5	0.2328	0.5047	0.5852	0.4196	0.6825	0.7097	0.5403	0.5379	57
GALNT3	Candidate gene	0.437	0.879	0.3185	0.7961	0.552	0.5417	0.1313	0	0.7612	0.5154	0.7059	0	0.5641	0	0.6533	0.6735	0.4731	0.6	0.4615	0.7619	0.6074	0.8222	0.7259	0.5852	0.7926	0.5259	0.5852	0.5111	0.837	0.6207	0.4706	0.8	0.8235	0.6642	0.5	0.2328	0	0.5852	0.7946	0.1667	0.6532	0.5403	0.5379	58
SYT9	Candidate gene	0.4444	0.75	0.7111	0	0.552	0.5417	0.3636	0	0.0746	0.1154	0	0	0.9744	0	0	0	0.8387	0	0	0	0.6074	0.8222	0.1037	0.5852	0.1333	0.5259	0.0815	0.5111	0.1333	0	0	0	0	0.1343	0.5	0.2328	0.5047	0.5852	0.8839	0.619	0.4355	0.5403	0.5379	59
TMTC3	Candidate gene	0.4519	0.2419	0.7111	0	0.552	0.5417	0.1313	0	0.7612	0.9615	0	0	0	0	0	0	0	0	0.3231	0	0.6074	0.1259	0.7259	0.5852	0.1333	0.5259	0.5852	0.5111	0.1333	0	0	0	0	0.6642	0.5	0.8276	0.5047	0.5852	0.5982	0.0238	0.7581	0.5403	0.5379	60
RECK	Candidate gene	0.4593	0.2419	0.3704	0.6117	0.552	0.5417	0.1313	0	0.7612	0.1692	0	0	0	0.5946	0.6533	0.6735	0.1828	0	0.4923	0	0.163	0.8222	0.7259	0.5852	0.7926	0.5259	0.5852	0.5111	0.837	0.3276	0.8	0.8824	0.3647	0.6642	0.5	0.8276	0	0.5852	0.4554	0.5952	0.4194	0.5403	0.5379	61
SCN9A	Candidate gene	0.4667	0.1613	0.7111	0.5631	0.552	0.5417	0.303	0.3684	0.7612	0.2231	0.7059	0	0	0	0.6533	0	0.5699	0.6	0.5846	0.2143	0.6074	0.8222	0.0889	0.5852	0.0889	0.5259	0.5852	0.5111	0.837	0.7414	0.6706	0.4941	0.9294	0.6642	0.5	0.8276	0.5047	0.5852	0.8393	0.6349	0.4839	0.5403	0.5379	62
TTYH1	Candidate gene	0.4741	0.7339	0.7111	0.9126	0.552	0.5417	0	0	0	0.6692	0	0	0	0	0.6533	0	0	0	0.6462	0	0.6074	0.1259	0.7259	0.5852	0.1333	0.5259	0.5852	0.5111	0.1333	0	0	0	0	0.0672	0.5	0	0	0.5852	0	0	0.3548	0.5403	0	63
TTYH1	Candidate gene	0.4815	0.7339	0.7111	0.9126	0.552	0.5417	0	0	0	0.6692	0	0	0	0	0.6533	0	0	0	0.6462	0	0.6074	0.1259	0.7259	0.5852	0.1333	0.5259	0.5852	0.5111	0.1333	0	0	0	0	0.0672	0.5	0	0	0.5852	0	0	0.3548	0.5403	0	64
SLC25A27	Candidate gene	0.4889	0.2823	0.7111	0.301	0.552	0.5417	0	0	0	0.3769	0	0.6364	0	0	0.6533	0	0.2258	0	0	0.6429	0.6074	0.8222	0.1111	0.5852	0.7926	0.5259	0.5852	0.5111	0.837	0	0	0	0	0.6642	0.5	0	0	0.5852	0.5536	0.3095	0.7903	0.5403	0.5379	65
PRKG2	Candidate gene	0.4963	0.3387	0.7111	0.5437	0.552	0.5417	0.8788	0	0.7612	0.4462	0.7059	0	0.1795	0	0.2267	0.3469	0.4839	0	0.7231	0	0.6074	0.8222	0.237	0.5852	0.7926	0.5259	0.5852	0.5111	0.837	0.931	0.1294	0.5529	0.7176	0.0448	0.5	0.2328	0.5047	0.5852	0.1786	0.1032	0.5726	0.5403	0.5379	66
TMEFF2	Candidate gene	0.5037	0.4113	0.0815	0.5825	0.552	0.5417	0.1313	0	0	0.2846	0	0	0	0.5946	0.6533	0	0.4194	0	0.7846	0.9762	0.6074	0.8222	0.7259	0.5852	0.7926	0.5259	0.5852	0.5111	0.837	0	0	0	0	0.0299	0.5	0.5517	0.5047	0.5852	0.3482	0.6032	0.4032	0.5403	0.5379	67
TIMM8B	Candidate gene	0.5111	0.3548	0.3556	0.1942	0.552	0.5417	0.6566	0	0	0.4385	0.7059	0	0	0	0.6533	0	0.8172	0	0	0	0.6074	0.563	0.7259	0.5852	0.5111	0.5259	0.5852	0.5111	0.6148	0	0.9647	0.8118	0.5176	0.6642	0.5	0	0	0.5852	0.3571	0.2937	0.5	0.5403	0.5379	68
KCNIP1	Candidate gene	0.5185	0.2984	0.1852	0.4563	0.552	0.5417	0.6566	0	0.0746	0.8077	0	0	0.9744	0	0	0	0.3548	0	0	0	0.6074	0.8222	0.7259	0.5852	0.7926	0.5259	0.5852	0.5111	0.837	0	0.0235	0.7882	0.1765	0.097	0.5	0.5603	0.5047	0.5852	0.6161	0.5873	0.3387	0.5403	0.5379	69
UBR3	Candidate gene	0.5259	0.0565	0.7111	0	0.552	0.5417	0.6566	0	0	0.9154	0	0	0	0	0	0	0.5591	0	0.6769	0	0.6074	0.4	0.4444	0.5852	0.2667	0.5259	0.5852	0.5111	0.3926	0	0	0	0	0.6642	0.5	0.8276	0.5047	0.5852	0.7857	0.4127	0.4516	0.5403	0.5379	70
CEP290	Candidate gene	0.5333	0.2177	0.7111	0.6602	0.552	0	0.8788	0	0.3881	0.3923	0.7059	0	0	0.5946	0.6533	0.6735	0.3763	0.6	0.4308	0.4048	0.6074	0.4889	0.1926	0.5852	0.3778	0.5259	0.5852	0.5111	0.5259	0.3448	0.4235	0.5176	1	0.6642	0.5	0.8276	0.5047	0.1111	0	0.9365	0.3226	0.5403	0.5379	71
TMEM201	Candidate gene	0.5407	0.879	0.7111	0	0.552	0.5417	0.1313	0	0	0.6077	0	0	0	0	0	0	0	0	0	0	0.6074	0.1259	0.7259	0.5852	0.1333	0.5259	0.5852	0.5111	0.1333	0	0	0	0	0.6642	0.5	0.2328	0.5047	0.5852	0	0.9206	0.5081	0.5403	0.5379	72
ZNF385B	Candidate gene	0.5481	0.5323	0.7111	0	0.552	0.5417	0.4747	0	0	0.7	0	0	0	0	0	0	0.8065	0	0	0	0.6074	0.8222	0.7259	0.5852	0.7926	0.5259	0.5852	0.5111	0.837	0	0	0	0	0.1343	0.5	0.2328	0.5047	0.5852	0.4464	0.3333	0.1774	0.5403	0.5379	73
FAM217B	Candidate gene	0.5556	0	0.7111	0	0	0.5417	0.6566	0	0	0.7615	0	0	0	0	0	0	0	0	0	0	0.6074	0.1259	0.7259	0.5852	0.7926	0.5259	0.5852	0.5111	0.1333	0	0	0	0	0.1343	0.5	0.4569	0.5047	0.5852	0	0.754	0	0	0.5379	74
PNRC2	Candidate gene	0.563	0.879	0.1852	0.8544	0.552	0.5417	0	0	0	0.4077	0	0	0	0	0	0	0	0	0.5538	0	0.6074	0.4222	0.4074	0.5852	0.437	0.5259	0.1481	0.5111	0.5111	0	0	0	0	0.6642	0.5	0.8276	0.5047	0.5852	0	0.873	0.1935	0.5403	0.5379	75
CCNA1	Candidate gene	0.5704	0.4516	0.7111	0.6408	0.552	0.5417	0	0	0.2836	0.1231	0.7059	0.6364	0.4359	0.5946	0.6533	0.6735	0.4301	0	0.7077	0.9524	0.1778	0.5556	0.4	0.1704	0.5704	0.5259	0.5852	0.5111	0.563	0.9655	0.8706	0.7294	0.9882	0.6642	0.5	0.2328	0.5047	0.5852	0.2589	0.5397	0.0565	0.5403	0.5379	76
EPC1	Candidate gene	0.5778	0.4597	0.7111	0.2621	0.552	0.5417	0.6566	0	0	0.5846	0	0	0	0	0	0	0.7527	0	0.7692	0	0.1481	0.8222	0.7259	0.5852	0.7926	0.5259	0.5852	0.5111	0.837	0	0	0	0	0.6642	0.5	0	0.5047	0.5852	0.6964	0.7063	0.4435	0.5403	0.5379	77
TTC21B	Candidate gene	0.5852	0.5	0.7111	0.767	0.552	0.5417	0.8788	0	0	0.9077	0	0	0	0	0	0	0.6882	0.6	0.4154	0	0.6074	0.5407	0.7259	0.5852	0.1333	0.5259	0.5852	0.5111	0.4519	0	0.2941	0.1529	0.2	0.6642	0.5	0.8276	0.5047	0.5852	0.4732	0.4127	0.7984	0.5403	0.5379	78
LZIC	Candidate gene	0.5926	0.1774	0.7111	0.3204	0.552	0.5417	0.8788	0	0	0.5385	0	0	0	0	0	0	0	0	0	0.8571	0.6074	0.2815	0.7259	0.5852	0.2074	0.5259	0.5852	0.5111	0.2815	0	0	0	0	0.6642	0.5	0.2328	0	0.5852	0.6518	0.8254	0.6774	0.5403	0.5379	79
COMMD10	Candidate gene	0.6	0.879	0.7111	0.3204	0.552	0.5417	0	0	0	0.5615	0	0	0	0	0	0	0.3011	0	0	0	0.6074	0.4667	0.7259	0.5852	0.4963	0.5259	0.5852	0.5111	0.4963	0	0.8471	0.6353	0.4941	0.6642	0.5	0.8276	0.5047	0.5852	0.75	0.8016	0.6371	0.5403	0.5379	80
RARS2	Candidate gene	0.6074	0.879	0.7111	0.8252	0.552	0.5417	0.6566	0	0.7612	0.8	0.7059	0	0	0.5946	0.6533	0.6735	0	0.6	0.9385	0.619	0.6074	0.2074	0.3778	0.5852	0.5333	0.5259	0.5852	0.5111	0.2222	0	0	0	0	0.6642	0.5	0.2328	0	0.5852	0.3393	0.4127	0.2661	0.5403	0.5379	81
GLE1	Candidate gene	0.6148	0.6532	0.7111	0.6311	0.552	0.5417	0.8788	0	0.0746	0.7154	0	0	0	0	0	0	0.9247	0.6	0.9385	0.7143	0.6074	0.2815	0.7259	0.5852	0.3111	0.5259	0.5852	0.5111	0.2815	0.6034	0.2588	0.9176	0.6	0.6642	0.5	0.2328	0.5047	0.5852	0	0.4127	0.379	0.5403	0.5379	82
TEAD1	Candidate gene	0.6222	0.1452	0.1852	0.4854	0.552	0.5417	0	0	0.7612	0.4308	0.7059	0	0	0	0.6533	0	0.8602	0.6	0.2462	0.8571	0.6074	0.563	0.7259	0.5852	0.5556	0.5259	0.5852	0.5111	0.6519	0.8103	0.3059	1	0.3059	0.3134	0.5	0.8276	0.5047	0.5852	0	0.4921	0.0484	0.5403	0.5379	83
ARSJ	Candidate gene	0.6296	0.4113	0.3333	0.4078	0.552	0.5417	0.6566	0	0.7612	0.8308	0.7059	0	0	0	0.6533	0	0.3226	0	0	0	0.6074	0.8222	0.7259	0.5852	0.7926	0.5259	0.5852	0.5111	0.837	0	0.6941	0.6706	0.4588	0.1716	0.5	0.4397	0.5047	0.0963	0.5804	0.3571	0.9435	0.5403	0.5379	84
GLIPR2	Candidate gene	0.637	0.4113	0.1852	0	0.552	0.5417	0.8788	0.6842	0.7612	0.1769	0	0	0	0	0	0	0.8602	0	0	0	0.6074	0.1778	0.7259	0.5852	0.4074	0.5259	0.5852	0.5111	0.1926	0	0	0	0	0.6642	0.5	0	0	0.5852	0.8482	0.2937	0	0.5403	0.5379	85
ZFYVE1	Candidate gene	0.6444	0.879	0.7111	0	0.552	0.5417	0.8788	0	0.7612	0.6231	0	0	0	0	0	0	0	0	0	0	0.6074	0.2815	0.7259	0.5852	0.7926	0.5259	0.5852	0.5111	0.2815	0	0	0	0	0.6642	0.5	0.2328	0.5047	0.5852	0.6339	0.6587	0.5806	0.5403	0.5379	86
SCYL2	Candidate gene	0.6519	0.3306	0.7111	0.7087	0.552	0.5417	0.8788	0	0	0.5538	0	0	0	0	0	0	0	0	0	0	0.6074	0.4	0.2519	0.0889	0.2074	0.5259	0.0963	0.5111	0.2815	0	0.1647	0.6588	0.6706	0.6642	0.5	0.8276	0.5047	0.5852	0.9554	0.8968	0.6129	0.0565	0.5379	87
ORC3	Candidate gene	0.6593	0.6532	0.7111	0.2039	0.552	0.5417	0.3838	0	0.3881	0.7538	0.7059	0.6364	0.8974	0.5946	0.6533	0.6735	0.9785	0	0.2154	0	0.6074	0.3481	0.7259	0.5852	0.437	0.5259	0.5852	0.5111	0.4222	0.4655	0.9059	0.4235	0.6588	0.6642	0.5	0.8276	0.5047	0.5852	0.2321	0.754	0	0	0.5379	88
CYP39A1	Candidate gene	0.6667	0.379	0.7111	0.165	0.08	0.5417	0.1313	0	0.7612	0.5308	0.3333	0.2727	0.5641	0.5946	0.6533	0.6735	0	0	0	0	0.1926	0.8222	0.7259	0.5852	0.7926	0.5259	0.5852	0.5111	0.837	0	0.8824	0.3647	0.9529	0.6642	0.5	0.8276	0.5047	0.0889	0.7321	0.246	0.5968	0.5403	0.5379	89
NEB	Candidate gene	0.6741	0.2742	0.1852	0.5728	0.552	0.5417	0.8788	0	0.1791	0.6308	0.7059	0.6364	0	0	0.6533	0.6735	0.6559	0.6	0	0.6667	0.6074	0.5111	0.1778	0.5852	0.3481	0.5259	0.5852	0.5111	0.3259	0.8793	0.9529	0.8588	0.9176	0.1716	0.5	0.2328	0.5047	0.5852	0.875	0.0317	0.75	0.5403	0	90
KIAA1191	Candidate gene	0.6815	0.879	0.7111	0.9612	0.552	0.5417	0	0	0	0.5923	0	0	0	0	0	0	0.5161	0	0	0	0.6074	0.4667	0.237	0.5852	0.7926	0.5259	0.5852	0.5111	0.4519	0	0	0	0	0.6642	0.5	0	0.5047	0.5852	0.5089	0.7063	0.5645	0.5403	0.5379	91
MDN1	Candidate gene	0.6889	0.879	0.7111	0.835	0.552	0.5417	0.6566	0	0	0.7769	0	0	0.8974	0	0.6533	0	0.5914	0	0.9385	0	0.6074	0.3407	0.437	0.0889	0.2519	0.5259	0.5852	0.5111	0.3556	0.2759	0.6353	0.5412	0.7765	0.6642	0.5	0.2328	0	0.5852	0.5714	0.2063	0.4677	0.5403	0.5379	92
BCO2	Candidate gene	0.6963	0.5806	0.7111	0.466	0.552	0.5417	0.4747	0	0.7612	0.7231	0	0.6364	0	0	0.6533	0	0.2903	0	0.4	0	0.6074	0.8222	0.7259	0.5852	0.7926	0.5259	0.5852	0.5111	0.837	0	0	0	0	0.6642	0.5	0.2328	0.5047	0.1259	0	0.2698	0.9597	0.5403	0.5379	93
CPSF2	Candidate gene	0.7037	0.6532	0.7111	0.932	0.552	0.5417	0.8788	0	0.7612	0.7462	0.7059	0.6364	0.8974	0.5946	0.6533	0.6735	0.5269	0	0	0	0.6074	0.4815	0.7259	0.5852	0.3333	0.5259	0.5852	0.5111	0.5556	0	0	0	0	0.6642	0.5	0.8276	0.5047	0.5852	0.7054	0.4762	0.6935	0.5403	0.5379	94
ACTR6	Candidate gene	0.7111	0.879	0.7111	0.9903	0.552	0.5417	0	0	0	0.7308	0	0	0	0	0	0	0	0	0	0	0.6074	0.3259	0.7259	0.5852	0.5778	0.5259	0.5852	0.5111	0.3481	0	0.6118	0.2	0.7059	0.6642	0.5	0.8276	0.5047	0.5852	0.4107	0.3333	0.1452	0.5403	0.5379	95
ARL5A	Candidate gene	0.7185	0.5323	0.1852	0.8835	0.552	0.5417	0	0.6842	0.7612	0.2	0	0	0	0	0	0	0	0	0	0	0.6074	0.2815	0.7259	0.5852	0.7926	0.5259	0.5852	0.5111	0.3259	0	0.5765	0.2941	0.9412	0.6642	0.5	0.8276	0.5047	0.5852	0.6071	0.6111	0.7742	0.5403	0.5379	96
ECHDC2	Candidate gene	0.7259	0.879	0.7111	0	0.552	0.5417	0.4747	0	0.7612	0.8538	0	0.6364	0	0	0.6533	0	0	0	0	0	0.6074	0.2815	0.1333	0.5852	0.7926	0.5259	0.5852	0.5111	0.2815	0	0.5059	0.9294	0.4706	0.6642	0.5	0.2328	0.5047	0.1185	0.3036	0.5794	0.9113	0.5403	0.5379	97
SERTM1	Candidate gene	0.7333	0.879	0.7111	0.3883	0	0	0.303	0	0	0	0	0	0	0	0	0	0	0	0	0	0.6074	0.1259	0.7259	0.5852	0.7926	0.5259	0.5852	0.5111	0.1333	0	0	0	0	0.097	0.5	0	0.5047	0.5852	0	0.873	0	0	0.5379	98
PPFIBP2	Candidate gene	0.7407	0.6532	0.1852	0.2427	0.552	0.5417	0.6566	0	0	0.6154	0	0	0	0	0	0	0.9247	0	0	0	0.6074	0.4444	0.7259	0.5852	0.7926	0.5259	0.5852	0.5111	0.5481	0.7586	0.9176	0.7765	0.5765	0.6642	0.5	0.8276	0.5047	0.5852	0.5268	0.4127	0.8226	0.5403	0.5379	99
SLC25A33	Candidate gene	0.7481	0.879	0.7111	0.7379	0.552	0.5417	0.303	0	0	0.3846	0	0	0	0	0	0	0	0	0	0	0.6074	0.8222	0.7259	0.5852	0.7926	0.5259	0.5852	0.5111	0.837	0	0	0	0	0.6642	0.5	0	0.5047	0.5852	0.625	0.3333	0.8306	0.5403	0.5379	100
DPF3	Candidate gene	0.7556	0.2419	0.1852	0.7184	0.552	0.5417	0	0	0	0.8692	0	0	0	0	0	0	0.7957	0	0	0	0.6074	0.8222	0.7259	0.5852	0.7926	0.5259	0.5852	0.5111	0.837	0	0	0	0	0.1343	0.5	0	0	0.5852	0	0	0.2823	0.5403	0.5379	101
RASGEF1B	Candidate gene	0.763	0.5323	0.7111	0.9515	0.552	0.5417	0	0	0	0.3308	0	0	0	0	0	0	0.6559	0	0	0	0.6074	0.8222	0.7259	0.5852	0.2074	0.5259	0.5852	0.5111	0.837	0	0	0	0	0.6642	0.5	0.2328	0.5047	0.1333	0.8661	0.1429	0.1935	0.5403	0.5379	102
IQCD	Candidate gene	0.7704	0	0.7111	0	0.552	0.5417	0.6566	0	0	0.5462	0	0	0	0	0	0	0	0	0	0	0.6074	0.8222	0.2148	0.5852	0.7926	0.5259	0.5852	0.5111	0.837	0	0	0	0	0.6642	0.5	0.2328	0.5047	0.5852	0.6607	0.8095	0.8952	0.5403	0.5379	103
METTL5	Candidate gene	0.7778	0.879	0.7111	0	0.552	0.5417	0	0	0.7612	0.9	0	0	0	0	0	0	0	0	0	0	0.6074	0.1259	0.7259	0.5852	0.1333	0.5259	0.5852	0.5111	0.1333	0	0.6588	0.8941	0.3882	0.6642	0.5	0.8276	0.5047	0.5852	0.8929	0.6429	0.4597	0.5403	0.5379	104
C11orf57	Candidate gene	0.7852	0	0.7111	0	0	0	0.6566	0	0	0.4769	0	0	0	0	0	0	0	0	0	0	0.6074	0.2815	0.7259	0.5852	0.7926	0.5259	0.5852	0.5111	0.2815	0	0	0	0	0.6642	0.5	0	0	0.5852	0	0	0.879	0.5403	0.5379	105
GJB7	Candidate gene	0.7926	0.6532	0.7111	0	0.552	0.5417	0.1313	0	0	0.2462	0.2941	0.0303	0	0	0.1067	0	0	0	0	0	0.6074	0.8222	0.7259	0.5852	0.7926	0.5259	0.5852	0.5111	0.837	0	0	0	0	0.1716	0.5	0.2328	0.5047	0.5852	0.9464	0.9603	0.8387	0.5403	0.5379	106
DYNC1I2	Candidate gene	0.8	0.6532	0.7111	0.9709	0.552	0.5417	0.8788	0	0.3881	0.8615	0.7059	0	0.2564	0.5946	0.6533	0.6735	0.9785	0	0.8923	0	0.6074	0.6148	0.3111	0.5852	0.4593	0.5259	0.5852	0.5111	0.6148	0	0	0	0	0.6642	0.5	0	0.5047	0.5852	0.4821	0.5635	0.6532	0.5403	0.5379	107
ANKFN1	Candidate gene	0.8074	0	0.7111	0	0.552	0.5417	0.4747	0	0	0.9231	0	0	0	0	0	0	0.8817	0	0	0	0.6074	0.8222	0.7259	0.5852	0.7926	0.5259	0.5852	0.5111	0.837	0	0	0	0	0.2239	0.5	0.2328	0.5047	0.5852	0.3929	0.4127	0.3306	0.5403	0.5379	108
CSRNP3	Candidate gene	0.8148	0.4597	0.7111	0.2524	0.552	0	0.8788	0	0	0.6385	0	0	0	0	0	0	0.5806	0	0.9385	0	0.6074	0.8222	0.7259	0.5852	0.7926	0.5259	0.5852	0.5111	0.837	0	0.5176	0.5765	0.0706	0.2239	0.5	0.5	0.5047	0.5852	0.9107	0.1032	0	0.5403	0.5379	109
C11orf57	Candidate gene	0.8222	0	0.7111	0	0	0	0.6566	0	0	0.4769	0	0	0	0	0	0	0	0	0	0	0.6074	0.2815	0.7259	0.0741	0.7926	0.5259	0.5852	0.5111	0.2815	0	0	0	0	0.6642	0.5	0.8276	0.5047	0.5852	0	0.873	0.879	0.5403	0.5379	110
IL22RA1	Candidate gene	0.8296	0.5887	0.2963	0.5534	0.552	0.5417	0.1313	0	0.2537	0.9538	0	0	0.3846	0.5946	0.2533	0.0408	0.3548	0	0.8	1	0.6074	0.8222	0.1333	0.5852	0.7926	0.5259	0.5852	0.5111	0.837	0	0.2	0.2235	0.9647	0.6642	0.5	0.2328	0.5047	0.5852	0.3661	0.754	0.9194	0.5403	0.5379	111
C12orf50	Candidate gene	0.837	0.879	0.7111	0	0.552	0	0	0	0	0	0	0	0	0	0	0	0.7849	0	0	0	0.6074	0.8222	0.7259	0.5852	0.7926	0.5259	0.5852	0.5111	0.837	0	0	0	0	0.6642	0.5	0	0.5047	0.5852	0.1875	0.754	0.2984	0.5403	0.5379	112
CDH26	Candidate gene	0.8444	0.6532	0.3926	0.4272	0.552	0.5417	0.1313	0	0	0.8769	0	0	0	0	0	0	0.3978	0	0	0	0.6074	0.8222	0.7259	0.5852	0.7926	0.5259	0.5852	0.5111	0.837	0	0	0	0	0.1716	0.5	0.2328	0.5047	0.5852	0.8214	0.2778	0.9919	0.5403	0.5379	113
SLC35A1	Candidate gene	0.8519	0.6532	0.7111	0.8738	0.552	0.5417	0.1313	0	0.7612	0.4538	0.3725	0	0	0.5946	0.6533	0	0	0.6	0.9385	0.7619	0.6074	0.8222	0.7259	0.5852	0.7926	0.5259	0.5852	0.5111	0.837	0	0	0	0	0.6642	0.5	0.2328	0	0.5852	0.6429	0.9365	0.2742	0.5403	0.5379	114
METTL8	Candidate gene	0.8593	0.2419	0.7111	0	0.552	0.5417	0.6566	0	0	0.8462	0	0	0	0	0	0	0	0	0	0	0.6074	0.1259	0.7259	0.5852	0.7926	0.5259	0.5852	0.5111	0.1333	0	0.8235	0.6941	0.8588	0.6642	0.5	0.8276	0	0.1407	1	0.8175	0.6935	0.5403	0.0606	115
NABP1	Candidate gene	0.8667	0.5323	0.7111	0.9417	0.552	0.5417	0	0	0	0.3462	0	0	0	0	0	0	0	0	0	0	0.6074	0.2296	0.7259	0.5852	0.237	0.5259	0.5852	0.5111	0.2444	0	0.8118	0.8706	0.8	0	0.5	0.8276	0.5047	0.5852	0.4018	0.8492	0	0	0.5379	116
SCN7A	Candidate gene	0.8741	0.3548	0.7111	0.7476	0.552	0.5417	0.303	0	0.7612	0.5077	0.7059	0	0	0	0.6533	0	0.5484	0	1	0	0.6074	0.8222	0.7259	0.5852	0.7926	0.5259	0.5852	0.5111	0.837	0.7069	0.4941	0.0824	0.8118	0.6642	0.5	0.8276	0	0.5852	0.2054	0.5397	0.9274	0.5403	0.5379	117
UHRF1BP1L	Candidate gene	0.8815	0	0.7111	0.8641	0.552	0.5417	0.8788	0	0	0.7846	0	0	0	0	0	0	0	0	0	0	0.6074	0.8222	0.7259	0.5852	0.7926	0.5259	0.5852	0.5111	0.837	0	0.7529	0.3882	0.8941	0.6642	0.5	0.2328	0.5047	0.5852	0.8125	0.9048	0.1129	0.5403	0.5379	118
SYCP2	Candidate gene	0.8889	0.2419	0.7111	0.4466	0.552	0	0	0	0	0.5231	0.7059	0	0	0	0.6533	0	0.7312	0	0.5385	0	0.6074	0.8222	0.7259	0.5852	0.7926	0.5259	0.5852	0.5111	0.837	0.8448	0.6471	0.9412	0.8353	0.6642	0.5	0.2328	0.5047	0.5852	0	0.9365	0.8065	0.5403	0.5379	119
DZANK1	Candidate gene	0.8963	0.879	0.7111	0	0.552	0.5417	0.3838	0	0	0.6846	0	0	0	0	0	0	0	0	0	0	0.6074	0.2074	0.7259	0.5852	0.7926	0.5259	0.5852	0.5111	0.2222	0	0.5294	0.9765	0.7412	0.6642	0.5	0.8276	0.5047	0.5852	0.5	0.754	0	0	0.5379	120
ODF2	Candidate gene	0.9037	0.3145	0.7111	0.534	0.552	0	0.4747	0	0.3881	0.6	0.7059	0	0	0.5946	0.6533	0.6735	0.9247	0	0.2615	0	0.6074	0.237	0.7259	0.5852	0.237	0.5259	0.5852	0.5111	0.2074	1	1	0.9882	0.4353	0.6642	0.5	0.2328	0.5047	0.5852	0.9732	0.754	0.2903	0.5403	0.5379	121
SESTD1	Candidate gene	0.9111	0.879	0.7111	0.4757	0.552	0.5417	0.8788	0	0	0.9462	0	0	0	0	0	0	0.7634	0	0	0	0.6074	0.8222	0.7259	0.5852	0.7926	0.5259	0.5852	0.5111	0.837	0	0	0	0	0.6642	0.5	0.2328	0.5047	0.5852	0	0.4127	0.5565	0.0565	0.5379	122
NMI	Candidate gene	0.9185	0.5323	0.7111	0.2233	0.552	0.5417	0.8788	0	0	0.8385	0	0.6364	0	0.5946	0.6533	0.6735	0.9785	0	0	0	0.6074	0.5481	0.7259	0.5852	0.5259	0.5259	0.5852	0.5111	0.6519	0.431	0.9765	0.3765	0.1059	0.6642	0.5	0.8276	0.5047	0.5852	0.9196	0.754	0.0645	0.5403	0.5379	123
TMEM132E	Candidate gene	0.9259	0.879	0.3926	0	0.552	0	0.1313	0	0	0.9769	0	0	0	0	0	0	0.4946	0	0	0	0.6074	0.8222	0.7259	0.5852	0.7926	0.5259	0.5852	0.5111	0.837	0	0	0	0	0.1343	0.5	0.2328	0.5047	0.5852	0.9821	0.0556	0.4274	0.5403	0.5379	124
SPACA1	Candidate gene	0.9333	0.879	0.3926	0.8058	0	0	0.1313	0	0	0.9692	0	0	0	0	0	0	0.6882	0	0.8462	0	0.6074	0.8222	0.7259	0.5852	0.7926	0.5259	0.5852	0.5111	0.837	0	0.7176	0.1765	0.6824	0.6642	0.5	0.2328	0.5047	0.5852	0.8571	0.246	0.8548	0.5403	0.5379	125
RBM43	Candidate gene	0.9407	0.879	0.7111	0	0.552	0	0	0	0	0.8154	0	0	0	0	0	0	0.9785	0	0	0	0.6074	0.1259	0.7259	0.5852	0.1333	0.5259	0.5852	0.5111	0.1333	0	0	0	0	0.6642	0.5	0.2328	0.5047	0.5852	0.6696	0.754	0.9758	0.5403	0.5379	126
PIH1D2	Candidate gene	0.9481	0	0.7111	0	0.552	0.5417	0	0	0	0.9923	0	0	0	0	0	0	0	0	0	0	0.6074	0.8222	0.7259	0.5852	0.7926	0.5259	0.5852	0.5111	0.837	0	0	0	0	0.6642	0.5	0.2328	0.5047	0.5852	0.6786	0.754	0.8548	0	0.5379	127
TEX12	Candidate gene	0.9556	0.879	0.7111	0.835	0	0.5417	0	0	0	0.9308	0.7059	0	0	0	0	0	0	0	0.8462	0	0.6074	0.8222	0.7259	0.5852	0.7926	0.5259	0.5852	0.5111	0.837	0	0.7882	0.0471	0.8471	0.6642	0.5	0.4397	0	0.5852	0.7232	0.9683	0.7661	0.5403	0.5379	128
OR6A2	Candidate gene	0.963	0.3871	0.3556	0.9806	0.552	0.5417	0.1313	0	0	0.8231	0.1176	0.6364	0	0	0.6533	0.6735	0	0	0	0	0.6074	0.8222	0.7259	0.5852	0.7926	0.5259	0.5852	0.5111	0.837	0	0	0	0	0.1716	0	0	0	0.5852	0.7589	1	0.6855	0	0.5379	129
DCAF17	Candidate gene	0.9704	0.879	0.7111	0.8932	0	0	0.4747	0	0	0.9308	0	0	0	0	0	0	0	0.6	0	0.2619	0.6074	0.3852	0.7259	0.5852	0.2667	0.5259	0.5852	0.5111	0.3926	0	0.7059	0.6235	0.6471	0.6642	0.5	0.8276	0.5047	0.163	0.9911	0.8492	0	0.5403	0.5379	130
CCDC129	Candidate gene	0.9778	0	0.7111	0	0	0.5417	0.4747	0	0	0	0	0	0	0	0	0	0.7634	0	0	0	0.6074	0.8222	0.7259	0.5852	0.7926	0.5259	0.5852	0.5111	0.837	0	0	0	0	0.6642	0.5	0.5	0.5047	0.5852	0.9375	0.9365	0.9516	0.5403	0.5379	131
PIH1D2	Candidate gene	0.9852	0	0.7111	0	0.552	0.5417	0	0	0	0.9923	0	0	0	0	0	0	0	0	0	0	0.6074	0.8222	0.7259	0.5852	0.7926	0.5259	0.5852	0.5111	0.837	0	0	0	0	0.6642	0.5	0	0	0.5852	0	0	0.8548	0	0.5379	132
DEPDC4	Candidate gene	0.9926	0.5323	0.7111	0	0.552	0.5417	0	0	0	0.9846	0	0	0	0	0	0	0	0	0	0	0.6074	0.8222	0.7259	0.5852	0.7926	0.5259	0.5852	0.5111	0.837	0	0	0	0	0.6642	0.5	0.2328	0.5047	0.1037	0.8304	0.9841	0.9032	0.5403	0.5379	133
C6orf163	Candidate gene	1	0.879	0.7111	0	0	0	0.8788	0	0	0	0	0	0	0	0	0	0	0	0	0	0.6074	0.8222	0.7259	0.5852	0.7926	0.5259	0.5852	0.5111	0.837	0	0	0	0	0.6642	0.5	0.2328	0	0.5852	0	0	1	0	0.5379	134

## Sheet: Halter_CNS
Gene name	Group	P-value	Annotation â€“ Gene Ontology	Annotation â€“ UniProt	Text-mining	Annotation â€“ InterPro	Annotation â€“ Pfam	Annotation â€“ SIMAP (localization)	Annotation â€“ DrugBank	Annotation â€“ Stitch	Annotation â€“ RGD ChEBI	Annotation â€“ Reactome	Annotation â€“ WikiPathways	Annotation â€“ RGD pathways	Annotation â€“ BioCarta	Annotation â€“ CPDB	Annotation â€“ hiPathDB	Annotation â€“ GAD	Annotation â€“ OMIM	Annotation â€“ RGD MP	Annotation â€“ RGD RDO	Interaction â€“ String	Interaction â€“ BioGrid	Interaction â€“ I2D	Interaction â€“ IntAct	Interaction â€“ iRefIndex	Interaction â€“ Mint	Interaction â€“ HPRD	Interaction â€“ MIPS	Interaction â€“ GeneRIF	Expression â€“ Su et al (2002)	Expression â€“ Su et al (2004)	Expression â€“ CMAP	Expression â€“ Lukk et al	Annotation â€“ PaGenBase	Annotation â€“ CGAP	Annotation â€“ GNF	Annotation â€“ eGenetics	Blast	Precalculated â€“ Ouzounis	Precalculated â€“ Prospectr	Precalculated â€“ HaploPred	Annotation â€“ Aura	Annotation â€“ mirZ	id
LTB	Training gene	0.0099	0.0421	0.0396	0.0488	0.0412	0.0538	0.1728	0	0	0.0707	0	0	0.1081	0	0.0615	0.1	0.0563	0	0.0635	0	0.0693	0.0891	0.0891	0.0693	0.0891	0.5248	0.0891	0.0495	0.0891	0.1429	0.6857	0.1	0.0714	0.0404	0.0594	0	0	0.0693	0	0	0.7865	0.0455	0.0947	0
BDNF	Training gene	0.0891	0.1579	0.1782	0.1585	0.134	0.1828	0.1728	0	0.0185	0.0707	0	0.1481	0.2973	0.0625	0.1692	0.44	0.1831	0.0455	0.1905	0.1333	0.0594	0.0891	0.0891	0.0693	0.0891	0.0297	0.0891	0.5446	0.0891	0.0179	0.1857	0.1429	0.1429	0.6566	0.6337	0.5	0.507	0.0693	0.0506	0.5682	0.0899	0.1705	0.5579	8
GRIN1	Training gene	0.099	0.3368	0.2475	0.1829	0.1134	0.1075	0.1728	0.0909	0.037	0.2323	0.2813	0.037	0.5405	0.125	0.2	0.42	0.3099	0.1818	0.2063	0.0333	0.1386	0.0891	0.0891	0.0693	0.0891	0.0297	0.0891	0.0495	0.0891	0.0357	0.0143	0.0143	0.0286	0.596	0.6337	0.5	0.507	0.0693	0.1772	0.2614	0.5281	0.125	0.0421	9
CXCL12	Training gene	0.1089	0.1158	0.1287	0.2317	0.2062	0.2043	0.5309	0.5455	0.1296	0.0707	0.0938	0.2593	0.2432	0.0313	0.1538	0.26	0.1408	0.2273	0	0.2667	0.1584	0.0891	0.0891	0.0693	0.0891	0.0297	0.0891	0.5446	0.0891	0.1071	0.5	0.1714	0.1857	0.1616	0.6337	0.5	0.507	0.1584	0.1139	0.75	0.2472	0.1591	0.0421	10
GRM1	Training gene	0.1188	0.2947	0.2475	0.2073	0.1031	0.1183	0.1728	0.3636	0.1852	0.2626	0.2188	0.0741	0.5135	0.1875	0.2462	0.4	0.2817	0.1364	0.1746	0.3667	0.1287	0.0891	0.0891	0.5842	0.0891	0.0297	0.0891	0.5446	0.0891	0.0536	0.0714	0.0571	0.0429	0.1717	0.6337	0.5	0.507	0.0693	0.038	0.2614	0.5169	0.5909	0.5579	11
NPY	Training gene	0.1287	0.1474	0.4257	0.1951	0.1753	0.172	0.1728	0.4545	0.2593	0.1515	0.0313	0	0.7027	0	0.2154	0.3	0.169	0	0.4127	0.0667	0.0099	0.0891	0.0891	0.0693	0.0891	0.0297	0.0891	0.5446	0.0891	0.0714	0.4	0.1143	0.0571	0.5051	0.6337	0.5	0.507	0.1782	0.0759	0.5341	0.2584	0.5909	0.5579	12
GAL	Training gene	0.1386	0.2105	0.198	0.1707	0.1237	0.129	0.1728	0	0.1111	0.1818	0.0313	0	0	0.2188	0.2615	0.28	0.3521	0	0.2857	0.1	0.0099	0.0891	0.0891	0.5842	0.0891	0.5248	0.0891	0.5446	0.0891	0.2143	0.3429	0.1571	0.1143	0.6061	0.6337	0.5	0.507	0.1683	0.3165	0.5341	0.236	0.5909	0.5579	13
KIF5C	Training gene	0.1485	0.5053	0.7624	0.122	0.1546	0.1505	0.9259	0	0	0.3434	0	0	0	0	0.3077	0	0.6761	0	0.5556	0	0.6238	0.0891	0.0891	0.0693	0.0891	0.5248	0.0891	0.5446	0.0891	0	0.1571	0.2143	0.0143	0.4848	0.6337	0.5	0	0.0693	0.557	0.375	0.1461	0.125	0.0947	14
CYP2D6	Training gene	0.1584	0.6842	0.7129	0.2927	0.1856	0.6129	0.1728	0.1818	0.2407	0.0707	0.25	0.1111	1	0.0938	0.4308	0.46	0.2254	0.0909	0	0.4	0.1881	0.0891	0.0891	0.5842	0.0891	0.5248	0.6337	0.5446	0.0891	0.1607	0	0	0	0.2424	0.6337	0	0.507	0.0693	0.1266	0.2273	0	0	0.5579	15
TNFSF4	Training gene	0.1683	0.0947	0.0891	0.1463	0.0928	0.0538	0.4074	0	0.2222	0.2121	0	0	0	0	0.7231	0.1	0.2676	0.2727	0.5397	0.6667	0.1881	0.8515	0.0891	0.5842	0.0891	0.5248	0.0891	0.5446	0.0891	0.0893	0.1143	0.1286	0.2	0.2323	0.6337	0.5	0.507	0.1485	0.8101	0.9886	0.5618	0.5909	0.5579	16
CCL2	Candidate gene	0.1782	0.1053	0.099	0.1098	0.2062	0.2043	0.5309	0.8182	0.1667	0.0707	0.125	0.6667	0.2432	0.1563	0.1385	0.24	0.1268	0.6364	0	0.1667	0.0297	0.5446	0.4356	0.5842	0.5149	0.5248	0.6337	0.5446	0.6535	0.7679	0.9571	0.3429	0.6857	0.1919	0.1782	0.5	0.507	0.2079	0	0.2045	0.3708	0.5909	0.5579	17
CNTNAP2	Candidate gene	0.1881	0.3895	0.2475	0.3293	0.6186	0.6129	0.1728	0	0.6296	0.4646	0	0	0	0	0.7231	0.74	0.2535	0.6364	0.4762	0.2333	0.6238	0.4554	0.7426	0.5842	0.4356	0.5248	0.6337	0.5446	0.5248	0.125	0.0857	0.3	0.1286	0.6667	0.6337	0.5	0.507	0.6436	0.3924	0.6591	0.3371	0.5909	0.5579	18
KIF5C	Training gene	0.198	0.5053	0.7624	0.122	0.1546	0.1505	0.9259	0	0	0.3434	0	0	0	0	0.3077	0	0.6761	0	0.5556	0	0.6238	0.0891	0.7426	0.5842	0.0891	0.5248	0.0891	0.5446	0.0891	0	0	0	0	0.4848	0.6337	0	0	0.0693	0	0	0.1461	0.125	0.0947	19
PML	Candidate gene	0.2079	0.1368	0.7129	0.3415	0.6186	0.6129	0.7654	0	0.6296	0.4242	0.6875	0.6667	0.4595	0.625	0.7231	0.74	0.3944	0.6364	0.7143	0	0.2079	0.6733	0.4653	0.1584	0.6337	0.5248	0.6337	0.5446	0.6832	0.6429	0.1286	0.4571	0.5	0.1212	0.6337	0.5	0.507	0.2673	0.0633	0.8182	0.7303	0.5909	0.0421	20
PECAM1	Candidate gene	0.2178	0.2421	0.2475	0.2561	0	0.6129	0.1728	0	0	0.1414	0	0	0.3784	0.625	0.7231	0.36	0.1549	0	0.3016	0.3	0.6238	0.505	0.7426	0.5842	0.3465	0.5248	0.2079	0.5446	0.3861	0	0	0	0	0.1414	0.6337	0	0	0.6436	0	0	0.5843	0.5909	0.5579	21
NF1	Candidate gene	0.2277	0.2316	0.5941	0.378	0.6186	0.6129	0.9259	0	0.6296	0.5253	0	0.1852	0.8378	0.625	0.3385	0.74	0.6197	0.6364	0.1429	0.5333	0.0891	0.5743	0.2277	0.5842	0.3762	0.5248	0.1782	0.5446	0.3267	0.5357	0.0286	0.8286	0.4571	0.8384	0.1782	0.5	0.507	0.6436	0	0.0114	0.2809	0.5909	0.5579	22
ALCAM	Candidate gene	0.2376	0.3579	0.1485	0.439	0.6186	0.6129	0.1728	0	0.6296	0.1717	0.6875	0	0	0.625	0.7231	0.74	0.9155	0	0.619	0	0.1683	0.3069	0.7426	0.5842	0.3564	0.5248	0.6337	0.5446	0.4059	0.3214	0.5857	0.7571	0.4143	0.1919	0.6337	0.5	0.507	0.6436	0.0886	0.2841	0.1798	0.5909	0.5579	23
WASF2	Candidate gene	0.2475	0.3053	0.5941	0.7561	0.6186	0.6129	0.7654	0	0.6296	0.6061	0.6875	0.6667	0.3784	0.625	0.7231	0.74	0.4225	0	0.4444	0	0.6238	0.3861	0.3762	0.5842	0.6139	0.5248	0.6337	0.5446	0.5644	0	0.8571	0.6	0.1571	0.2424	0.6337	0.5	0	0.6436	0.3671	0.4886	0.3708	0.5909	0.5579	24
RPA2	Candidate gene	0.2574	0.6632	0.3168	0.561	0.6186	0.6129	0.7654	0	0.6296	0.3333	0.6875	0.6667	0.8378	0.625	0.7231	0.74	0.507	0	0	0	0.6238	0.6436	0.3861	0.5842	0.604	0.5248	0.2574	0.5446	0.6733	0.3393	0.3857	0.3143	0.6143	0.1313	0.0099	0.5	0	0.6436	0.8987	0.4318	0.0449	0.5909	0.5579	25
MYH11	Candidate gene	0.2673	0.4316	0.7327	0.3902	0.6186	0.6129	0.9259	0.8182	0.6296	0.303	0.6875	0	0.3784	0.625	0.7231	0.74	0.5634	0.6364	0.3651	0.4667	0.2277	0.5248	0.2376	0.5842	0.4158	0.5248	0.6337	0.5446	0.5941	0.2857	0.9286	0.0286	0.7	0.6364	0.6337	0.5	0.507	0.2178	0.1013	0.0341	0.1011	0.5909	0.5579	26
FGR	Candidate gene	0.2772	0.2842	0.802	0.5366	0.6186	0.6129	0	0	0.6296	0.3232	0.6875	0.6667	0.6216	0	0.2769	0.38	0.493	0	0.9683	0	0.1089	0.604	0.297	0.5842	0.5347	0.5248	0.6337	0.5446	0.604	0.375	0.9143	0.4	0.2286	0.101	0.6337	0.5	0	0.6436	0.3291	0.125	0.3146	0.5909	0.5579	27
CACNA2D1	Candidate gene	0.2871	0.8526	0.2475	0.5488	0.6186	0.6129	0.5309	0.2727	0.1481	0.1616	0	0.2593	0.3784	0	0.4	0.74	0.2958	0	0.8254	0	0.6238	0.8515	0.1782	0.5842	0.8317	0.5248	0.6337	0.5446	0.8614	0.6964	0.2571	0.5571	0.3286	0.2828	0.6337	0.5	0.507	0.2475	0.5316	0.0568	0.4719	0.5909	0.5579	28
EMX2	Candidate gene	0.297	0.4526	0.5941	0.4756	0.6186	0.6129	0.7654	0	0.6296	0.7172	0	0	0	0	0	0	0.3662	0.6364	0.3968	0.5667	0.1782	0.8515	0.7426	0.5842	0.8317	0.5248	0.6337	0.5446	0.8614	0.7857	0.7857	0.0714	0.5143	0.8384	0.6337	0.5	0	0.6436	0.0127	0.7045	0.0225	0.5909	0.5579	29
PTAFR	Candidate gene	0.3069	0.4842	0.3663	0.3171	0.6186	0.6129	0.1728	0	0.6296	0.202	0.1563	0.6667	0.3784	0.625	0.4154	0.32	0.3239	0	0.7619	0.4333	0.6238	0.5347	0.2871	0.5842	0.2178	0.5248	0.6337	0.5446	0.3168	0.8214	0.4857	0.4857	0.5429	0.3535	0.6337	0.5	0.507	0.6436	0.9114	0.9545	0.8427	0	0.5579	30
NR0B2	Candidate gene	0.3168	0.2526	0.9307	0.4024	0.6186	0.6129	0.5309	0	0.6296	0.1919	0.6875	0.6667	0.8378	0.625	0.7231	0.74	0.7324	0.6364	0.4603	0.7	0.6238	0.5842	0.4455	0.5842	0.5545	0.5248	0.2475	0.5446	0.6337	0.1786	0.6571	0.1857	0.9429	0.3434	0.6337	0.5	0.507	0.6436	0.1392	0.6705	0.1348	0.5909	0.5579	31
CCL13	Candidate gene	0.3267	0.1684	0.1188	0.3049	0.2062	0.2043	0.5309	0	0.0556	0.4747	0	0	0	0	0.1846	0.2	0.338	0	0.1587	0	0.0495	0.3465	0.7426	0.5842	0.8317	0.5248	0.6337	0.5446	0.5545	0.6786	0.4714	0.3857	0.9714	0.1818	0.6337	0.5	0.507	0.198	1	0.2045	0.9888	0.5909	0.5579	32
MAP3K6	Candidate gene	0.3366	0.4421	0.5941	0.2805	0.6186	0.6129	0.7654	0	0	0.3838	0	0.1852	0.6216	0.625	0.3385	0.74	0.7465	0	0.6667	0	0.6238	0.3861	0.2574	0.5842	0.3267	0.5248	0.6337	0.5446	0.4653	0	0.8857	0.9571	0.6	0.3333	0.6337	0.5	0.507	0.2376	0.4937	0.5909	0.7191	0.5909	0.5579	33
NFIC	Candidate gene	0.3465	0.6316	0.3168	0.4268	0.6186	0.6129	0	0	0.6296	0.404	0	0	0.8378	0.625	0.7231	0.74	0.4366	0	0.9048	0	0.6238	0.4257	0.7426	0.5842	0.5842	0.5248	0.6337	0.5446	0.4851	0.4821	0.7714	0.7429	0.4714	0.8384	0.6337	0.5	0.507	0.6436	0.0253	0.125	0.3483	0.5909	0.5579	34
MTHFD1L	Candidate gene	0.3564	0.8947	0.3168	0.2683	0.6186	0.6129	0.5309	0	0.6296	0.5051	0	0.6667	0.6216	0	0.7231	0.74	0.2394	0	0.6349	0	0.2178	0.4752	0.7426	0.5842	0.495	0.5248	0.6337	0.5446	0.5248	0	0	0	0	0.2222	0.1782	0.5	0	0.6436	0.2152	0.125	0.9213	0.5909	0.5579	35
APPBP2	Candidate gene	0.3663	0.7368	0.8317	0.9024	0.6186	0.6129	0	0	0	0.6465	0	0	0	0.625	0.7231	0.74	0.5634	0	0	0	0.6238	0.5644	0.4257	0.5842	0.5446	0.5248	0.6337	0.5446	0.6139	0.1964	0.1714	0.2571	0.7714	0.5455	0.6337	0.5	0.507	0.6436	0.6709	0.3636	0.1124	0.5909	0.5579	36
RCC1	Candidate gene	0.3762	0.7263	0.3168	0.8293	0.6186	0.6129	0.5309	0	0.6296	0.2828	0.6875	0	0	0.625	0.7231	0.74	0	0	0	0	0.6238	0.5149	0.4554	0.5842	0.4851	0.5248	0.6337	0.5446	0.5842	0.4286	0.5714	0.8429	0.4857	0.8384	0.0594	0.5	0	0.6436	0.8481	0.4318	0	0.5909	0.5579	37
KAZN	Candidate gene	0.3861	0.4105	0.5941	0.7683	0.6186	0.6129	0.7654	0	0	0.5556	0	0	0	0	0	0	0.6479	0	0.9524	0	0.6238	0.2772	0.7426	0.5842	0.2871	0.5248	0.6337	0.5446	0.2574	0.7321	0.2286	0.6857	0.1	0.3232	0.6337	0.5	0.507	0.6436	0	0.3068	0	0	0.0421	38
SRPK1	Candidate gene	0.396	0.3684	0.3168	0.7805	0.6186	0.6129	0.9259	0	0.6296	0.4444	0	0.6667	0	0	0.7231	0	0.9155	0	0	0	0.6238	0.5545	0.3663	0.1683	0.5644	0.5248	0.2376	0.5446	0.5248	0.3929	0.3286	0.3286	0.3143	0.8384	0.6337	0.5	0.507	0.6436	0.519	0.125	0.427	0.5909	0.5579	39
PLN	Candidate gene	0.4059	0.3158	0.4653	0.6585	0.6186	0.6129	0.3704	0	0.6296	0.3131	0	0.6667	0.5676	0.625	0.3692	0.32	0.6197	0.6364	0.873	0.6	0.6238	0.8515	0.3267	0.5842	0.8317	0.5248	0.6337	0.5446	0.8614	0.625	0.7286	0.0857	0.7286	0.8384	0.6337	0.5	0.507	0.6436	0	0.8864	0.2135	0.5909	0.5579	40
WDTC1	Candidate gene	0.4158	0.5368	0.5941	0.6341	0.6186	0.6129	0.7654	0	0	0.7576	0	0	0	0	0	0	0.8028	0	0.6825	0	0.6238	0.604	0.7426	0.5842	0.4653	0.5248	0.6337	0.5446	0.6238	0.6607	0.0571	0.9714	0.3714	0.1515	0.6337	0.5	0.507	0.6436	0.8354	0.7273	0.0112	0.5909	0.5579	41
GGNBP2	Candidate gene	0.4257	0.6	0.5941	0.5732	0.6186	0	0	0	0	0.6162	0	0	0	0	0	0	0	0	0	0	0.6238	0.2277	0.7426	0.5842	0.2871	0.5248	0.6337	0.5446	0.297	0	0	0	0	0.8384	0.6337	0	0	0.6436	0	0	0.4494	0.5909	0.5579	42
KIFC3	Candidate gene	0.4356	0.6526	0.7525	0.2195	0.1546	0.1505	0.5309	0	0.6296	0.5455	0.6875	0	0.6216	0.625	0.7231	0.74	0.9155	0	0	0	0.0396	0.3366	0.4158	0.5842	0.8317	0.5248	0.6337	0.5446	0.3564	0.8571	0.6286	0.6714	0.5571	0.8384	0.6337	0.5	0	0.1881	0.3544	0.125	0.5506	0.5909	0.5579	43
PDS5B	Candidate gene	0.4455	0.7684	0.5941	0.8415	0.6186	0	0	0	0.6296	0.5758	0.6875	0	0	0	0.7231	0	0.4789	0	0.2381	0	0.6238	0.4455	0.7426	0.5842	0.505	0.5248	0.6337	0.5446	0.4653	0.9643	0.1429	0.2857	0.7571	0.2626	0.6337	0.5	0.507	0.6436	0.443	0.6364	0.3258	0.5909	0.5579	44
TIMP2	Candidate gene	0.4554	0.1789	0.396	0.3537	0.6186	0.6129	0.5309	0	0.6296	0.0707	0.6875	0.6667	0	0.625	0.7231	0.74	0.2113	0	0.6032	0.3333	0.1485	0.8515	0.3564	0.5842	0.4554	0.5248	0.198	0.5446	0.4851	1	1	0.8571	0.4429	0.3737	0.1782	0.5	0.507	0.6436	0.1519	0.2045	0.5393	0.5909	0.5579	45
AATF	Candidate gene	0.4653	0.2632	0.9307	0.5976	0.6186	0.6129	0	0	0	0.7475	0.3125	0	0	0.625	0.7231	0.74	0.7887	0	0.6508	0	0.6238	0.6238	0.396	0.1485	0.5743	0.5248	0.6337	0.5446	0.6436	0.2321	0	0	0	0.8384	0.6337	0	0.507	0.6436	0.6203	0.4318	0.1236	0.5909	0.5579	46
STX12	Candidate gene	0.4752	0.5474	0.4653	0.8902	0.6186	0.6129	0.4074	0	0	0.7778	0.375	0	0	0	0.7231	0	0	0	0	0	0.6238	0.4158	0.2673	0.5842	0.5248	0.5248	0.2277	0.5446	0.4059	0.2679	0.4286	0.2714	0.6286	0.8384	0.1782	0.5	0	0.6436	0.8734	0.7614	0.2921	0.5909	0.5579	47
CBX1	Candidate gene	0.4851	0.8105	0.396	0.7073	0.6186	0.6129	0	0	0.6296	0.5657	0	0	0	0	0	0	0	0	0.8571	0	0.6238	0.6832	0.7426	0.5842	0.6634	0.5248	0.6337	0.5446	0.7228	0.8929	0.3143	0.2286	0.4286	0.5859	0.1782	0.5	0.507	0.6436	0.5949	0.3523	0.6404	0.1705	0.5579	48
FZR1	Candidate gene	0.495	0.2737	0.5941	0.6951	0.6186	0.6129	0	0	0.6296	0.5354	0.6875	0	0.8378	0.625	0.7231	0.74	0.9155	0	0.3175	0	0.6238	0.6931	0.4752	0.5842	0.6535	0.5248	0.6337	0.5446	0.7129	0.75	0.3571	1	0.7429	0.3737	0.6337	0.5	0.507	0.6436	0.2405	0.1705	0.0337	0.5909	0.5579	49
GRHL3	Candidate gene	0.505	0.1895	0.5941	0.8049	0.6186	0.6129	0.5309	0	0.0741	0.6667	0	0	0	0	0	0	0	0	0.2222	0	0.6238	0.8515	0.7426	0.5842	0.8317	0.5248	0.6337	0.5446	0.8614	0	0	0	0	0.2929	0.6337	0.5	0.507	0.6436	0.5443	0.5909	0.6517	0.5909	0.5579	50
WNT7B	Candidate gene	0.5149	0.1263	0.4158	0.7927	0.6186	0.6129	0.1728	0	0.6296	0.4848	0.1875	0.6667	0.4595	0.625	0.2308	0.74	0.9155	0	0.254	0.8667	0.6238	0.8515	0.3366	0.5842	0.8317	0.5248	0.6337	0.5446	0.8614	0	0.6143	0.9	0.5857	0.6162	0.6337	0.5	0.507	0.6436	0	0.1705	0	0.5909	0.0421	51
FAM76A	Candidate gene	0.5248	0	0.5941	0	0	0	0.7654	0	0	0.7273	0	0	0	0	0	0	0.5634	0	0	0	0.6238	0.2277	0.7426	0.5842	0.8317	0.5248	0.6337	0.5446	0.2178	0.4643	0.4143	0.7143	0.6714	0.4646	0.6337	0.5	0.507	0.6436	0.8861	0.4318	0.4831	0.5909	0.5579	52
NUDC	Candidate gene	0.5347	0.6	0.8416	0.6707	0.6186	0.6129	0.9259	0	0.6296	0.4949	0.6875	0	0.8378	0.625	0.7231	0.74	0	0	0	0	0.6238	0.6634	0.4059	0.5842	0.6436	0.5248	0.6337	0.5446	0.703	0	0	0	0	0.5455	0.6337	0	0.507	0.6436	0.7468	0.2386	0.4157	0.5909	0.5579	53
NDE1	Candidate gene	0.5446	0.4737	0.7822	0.4878	0.6186	0.6129	0.9259	0	0.6296	0.4343	0.6875	0	0	0.625	0.7231	0.74	0.8169	0.6364	0.5079	0	0.6238	0.3069	0.2772	0.5842	0.4356	0.5248	0.2178	0.5446	0.3564	0	0.5571	0.9143	0.5286	0.8384	0.1782	0.5	0.507	0.6436	0.8608	0.4318	0.3596	0.5909	0.5579	54
LOXL1	Candidate gene	0.5545	0.6211	0.7426	0.4634	0.6186	0.6129	0.5309	0	0.6296	0.2222	0.6875	0	0	0	0.7231	0	0.5634	0.6364	0.6984	0.8667	0.6238	0.8515	0.7426	0.5842	0.8317	0.5248	0.6337	0.5446	0.8614	0.3036	0.9429	0.6571	0.1714	0.8384	0.6337	0.5	0.507	0.6436	0.6962	0.6477	0.0562	0.5909	0.0421	55
LHX1	Candidate gene	0.5644	0.2	0.9307	0.8659	0.6186	0.6129	0.7654	0	0	0.6364	0	0.6667	0	0	0.7231	0	0	0	0.4286	0	0.6238	0.8515	0.7426	0.5842	0.2277	0.5248	0.6337	0.5446	0.8614	0.6071	0.7143	0.5857	0.3	0.8384	0.6337	0.5	0.507	0.6436	0.2025	0.0227	0.0787	0.5909	0.5579	56
CDC42EP4	Candidate gene	0.5743	0.5579	0.802	0	0.6186	0.6129	0.7654	0	0	0.8586	0	0	0	0	0	0	0	0	0	0	0.6238	0.2277	0.7426	0.5842	0.3861	0.5248	0.6337	0.5446	0.2772	0.5	0.0429	0.8857	0.2429	0.8384	0.1782	0.5	0.507	0.6436	0.6582	0.8182	0.6742	0.5909	0.5579	57
GGNBP2	Candidate gene	0.5842	0.6	0.5941	0.5732	0.6186	0	0.9259	0	0	0.6162	0	0	0	0	0	0	0	0	0	0	0.6238	0.2277	0.7426	0.5842	0.2871	0.5248	0.6337	0.5446	0.297	0	0.4429	0.3714	0.7857	0.8384	0.6337	0.5	0.507	0.6436	0.2532	0.9659	0.4494	0.5909	0.5579	58
STIM2	Candidate gene	0.5941	0.7053	0.1881	0.7439	0.6186	0.6129	0.5309	0	0.6296	0.6566	0	0	0.8378	0	0.3692	0	0.662	0	0.2698	0	0.6238	0.495	0.2178	0.5842	0.198	0.5248	0.6337	0.5446	0.2772	0	0	0	0	0.8384	0.1782	0.5	0.507	0.6436	0.9494	0.9091	0.6854	0.5909	0.5579	59
SLC9A1	Candidate gene	0.604	0.3474	0.2475	0.6829	0.6186	0.6129	0.1728	0.8182	0.0926	0.2929	0.6875	0.6667	0.8378	0.625	0.7231	0.74	0.4648	0	0.3492	0.2	0.6238	0.5941	0.2079	0.5842	0.2475	0.5248	0.6337	0.5446	0.4059	0.9286	0.8429	0.9857	0.9571	0.2727	0.6337	0.5	0.507	0.6436	0.1646	0.0568	0.4045	0.5909	0.5579	60
PPM1D	Candidate gene	0.6139	0.6947	0.9307	0.622	0.6186	0.6129	0	0	0.6296	0.3636	0	0	0.8378	0.625	0.7231	0.74	0.9155	0.6364	0.5873	0.8667	0.6238	0.3663	0.7426	0.5842	0.396	0.5248	0.6337	0.5446	0.5248	0.8393	0.3	0.4143	0.8143	0.8384	0.6337	0.5	0.507	0.6436	0.2278	0.4318	0.191	0.5909	0.5579	61
TMEM222	Candidate gene	0.6238	0.9158	0.4356	0	0.6186	0.6129	0.4074	0	0	0.8889	0	0	0	0	0	0	0	0	0	0	0.6238	0.4752	0.7426	0.5842	0.4356	0.5248	0.6337	0.5446	0.5248	0	0.7429	0.4429	0.6429	0.8384	0.6337	0.5	0	0.6436	0	0.3295	0	0.5909	0.5579	62
FAM46B	Candidate gene	0.6337	0	0.9307	0	0.6186	0.6129	0.6543	0	0	0.8283	0	0	0	0	0	0	0	0	0	0	0.6238	0.3069	0.7426	0.1386	0.2871	0.5248	0.6337	0.5446	0.3366	0	0	0	0	0.8384	0.6337	0.5	0.507	0.6436	0.5063	0.125	0.2697	0	0.5579	63
CHIC2	Candidate gene	0.6436	0.8632	0.802	0.9146	0.6186	0.6129	0.4074	0	0.6296	0.6768	0	0	0	0	0	0	0	0.6364	0	0.8667	0.6238	0.3861	0.7426	0.5842	0.5842	0.5248	0.6337	0.5446	0.4356	0	0.9	0.5286	0.3571	0.5455	0.6337	0.5	0.507	0.6436	0	0.7045	0.1685	0.5909	0.5579	64
BCAS3	Candidate gene	0.6535	0.8632	0.5941	0.6098	0.6186	0.6129	0.9259	0	0.6296	0.596	0	0	0	0	0	0	0.4366	0	0	0.8667	0.6238	0.2277	0.7426	0.5842	0.2871	0.5248	0.6337	0.5446	0.2178	0	0.2714	0.8714	0.8	0.4242	0.6337	0.5	0	0.6436	0.6835	0.7273	0.2247	0.5909	0.5579	65
CLPS	Candidate gene	0.6634	0.5263	0.396	0.5	0.6186	0.6129	0.1728	0.8182	0.6296	0.8485	0.3125	0	0	0.625	0.7231	0.74	0.7042	0	0.5238	0.7333	0.2475	0.8515	0.7426	0.5842	0.3564	0.5248	0.6337	0.5446	0.8614	0.8036	0.9857	0.2429	0.4	0.8384	0.6337	0.5	0.507	0.2772	0.7722	0.5341	0.4944	0	0.5579	66
SYTL1	Candidate gene	0.6733	0.7789	0.7129	0.8171	0.6186	0.6129	0	0	0	0.6869	0	0	0	0	0.7231	0	0	0	0.4921	0	0.6238	0.8515	0.3069	0.5842	0.8317	0.5248	0.6337	0.5446	0.8614	0	0	0	0	0.0909	0.6337	0	0.507	0.6436	0.7975	0.5909	0.4382	0	0.5579	67
SNX11	Candidate gene	0.6832	0.7158	0.802	0	0.6186	0.6129	0	0	0	0.7879	0	0	0	0	0	0	0	0	0	0	0.6238	0.2277	0.7426	0.5842	0.1881	0.5248	0.6337	0.5446	0.2178	0	0.2857	0.6286	0.8714	0.8384	0.6337	0.5	0.507	0.6436	0.4557	0.4318	0.8989	0.5909	0.5579	68
LHFPL5	Candidate gene	0.6931	0.4211	0.4653	0	0.6186	0.6129	0.358	0	0.6296	0.8788	0	0	0	0	0	0	0	0.6364	0.8254	0.6333	0.6238	0.8515	0.7426	0.5842	0.8317	0.5248	0.6337	0.5446	0.8614	0	0	0	0	0.8384	0.6337	0.5	0.507	0.6436	0	0.3068	0.7079	0	0.5579	69
PHACTR4	Candidate gene	0.703	0.3263	0.5941	0.9268	0.6186	0.6129	0	0	0	0.9394	0	0	0	0	0	0	0	0	0.381	0	0.6238	0.3069	0.1881	0.5842	0.198	0.5248	0.6337	0.5446	0.2574	0.7143	0.4571	0.5143	0.8857	0.1111	0.1782	0.5	0	0.6436	0	0	0.9775	0.125	0.5579	70
GINS3	Candidate gene	0.7129	0.9579	0.5941	0.8537	0.6186	0.6129	0	0	0.6296	0.3939	0	0	0	0	0	0	0.5634	0	0	0	0.6238	0.6337	0.7426	0.5842	0.396	0.5248	0.6337	0.5446	0.6634	0	0.6714	0.6143	0.7143	0.8384	0.6337	0.5	0.507	0.6436	0.4177	0.9318	0.5955	0.5909	0.5579	71
TEKT5	Candidate gene	0.7228	0.7895	0.8416	0	0.6186	0.6129	0.6543	0	0	0.7677	0	0	0	0	0	0	0.507	0	0	0	0.6238	0.8515	0.7426	0.5842	0.8317	0.5248	0.6337	0.5446	0.8614	0	0	0	0	0.8384	0.6337	0.5	0.507	0.6436	0.2911	0.5909	0.8539	0	0.5579	72
SESN2	Candidate gene	0.7327	0.8211	0.9307	0.9512	0.6186	0.6129	0.9259	0	0.6296	0.2424	0	0	0.8378	0	0.7231	0.74	0	0	0.3333	0	0.6238	0.4257	0.7426	0.5842	0.2871	0.5248	0.6337	0.5446	0.4653	0	0	0	0	0.4242	0.6337	0.5	0.507	0.6436	0.3418	0.125	0.3034	0.5909	0.0421	73
ATPIF1	Candidate gene	0.7426	0.3789	0.3168	0.4146	0.6186	0.6129	0.5309	0	0.6296	0.4545	0	0.6667	0	0	0.7231	0	0.9155	0	0.9206	0	0.6238	0.8515	0.2376	0.5842	0.8317	0.5248	0.6337	0.5446	0.8614	0	0.8714	0.4714	0.9	0.8384	0.1782	0.5	0.507	0.2574	0.5823	0.5341	0.6854	0.5909	0.5579	74
NIPAL3	Candidate gene	0.7525	0.8316	0.2475	0.9878	0.6186	0.6129	0.4074	0	0	1	0	0	0	0	0	0	0	0	0.8095	0	0.6238	0.2277	0.7426	0.5842	0.8317	0.5248	0.6337	0.5446	0.2178	0.5536	0.5286	0.4286	0.2714	0.3131	0.6337	0.5	0.507	0.6436	0.1899	0.6705	0	0.5909	0.5579	75
EYA3	Candidate gene	0.7624	0.4	0.5941	0.939	0.6186	0	0	0	0.6296	0.3737	0	0	0	0	0	0	0	0	0.746	0	0.6238	0.8515	0.7426	0.5842	0.8317	0.5248	0.6337	0.5446	0.8614	0.9464	0.6	0.5	0.6571	0.4747	0.6337	0.5	0	0.6436	0.2785	0.4886	0.0674	0.125	0.5579	76
TBC1D21	Candidate gene	0.7723	0.7579	0.9307	0	0.6186	0.6129	0	0	0	0.8384	0	0	0	0	0	0	0	0	0	0	0.6238	0.2277	0.7426	0.5842	0.8317	0.5248	0.6337	0.5446	0.2178	0	0	0	0	0.8384	0.6337	0.5	0.507	0.6436	0.6076	0.8182	0.6067	0.5909	0.5579	77
CCL1	Candidate gene	0.7822	0.2211	0.099	0.2439	0.2062	0.2043	0.5309	0	0.6296	0.4141	0	0	0	0	0.2769	0.2	0.1972	0	1	0.5	0.099	0.8515	0.7426	0.5842	0.8317	0.5248	0.6337	0.5446	0.8614	0.5179	0.2	0.0429	0.8286	0.3737	0.6337	0.5	0.507	0.6436	0.9241	0.9205	1	0.5909	0.5579	78
CD164L2	Candidate gene	0.7921	0.9158	0.1485	0	0.6186	0.6129	0.1728	0	0	0	0	0	0	0	0	0	0	0	0	0	0.6238	0.8515	0.7426	0.5842	0.8317	0.5248	0.6337	0.5446	0.8614	0	0	0	0	0.303	0.6337	0.5	0	0.6436	0.8228	0.5341	0.6292	0	0.5579	79
PTPN18	Candidate gene	0.802	0.9579	0.5941	0.878	0.6186	0.6129	0.7654	0	0.6296	0.5152	0	0.6667	0	0	0.7231	0	0	0	0	0	0.6238	0.8515	0.3366	0.5842	0.4752	0.5248	0.6337	0.5446	0.8614	0.4107	0.3714	0.7714	0.2571	0.3939	0.6337	0.5	0.507	0.6436	0.6329	0.8182	0.9438	0.5909	0.5579	80
CA4	Candidate gene	0.8119	0.4947	0.2079	0.7317	0.6186	0.6129	0.1728	0.8182	0.6296	0.2727	0.6875	0	0	0	0.7231	0.74	0.9155	0.6364	0.7302	0.8667	0.1089	0.8515	0.7426	0.5842	0.8317	0.5248	0.6337	0.5446	0.8614	0.9821	0.8143	0.5714	0.2857	0.4444	0.6337	0.5	0.507	0.6436	0.7089	0.0568	0.9101	0.5909	0.5579	81
STOML1	Candidate gene	0.8218	0.8842	0.1386	0.9756	0.6186	0.6129	0.1728	0	0	0.899	0	0	0	0	0	0	0	0	0	0	0.6238	0.4554	0.7426	0.5842	0.8317	0.5248	0.6337	0.5446	0.4356	0.5714	0.1	0.9286	0.0857	0.8384	0.6337	0.5	0.507	0.6436	0.2658	0.8182	0.573	0.5909	0.5579	82
THEMIS2	Candidate gene	0.8317	0.6737	0.5941	0.5122	0.6186	0.6129	0	0	0	0.7374	0	0	0	0	0	0	0.9155	0	0.7937	0	0.6238	0.8515	0.7426	0.5842	0.8317	0.5248	0.6337	0.5446	0.8614	0.4464	0.8286	0.5429	0.2143	0	0.6337	0.5	0.507	0.6436	0.5696	0.9318	0	0	0.5579	83
STPG1	Candidate gene	0.8416	0.7895	0.5941	0	0.6186	0.6129	0.6543	0	0	0.9192	0	0	0	0	0	0	0	0	0	0	0.6238	0.8515	0.7426	0.5842	0.8317	0.5248	0.6337	0.5446	0.8614	0	0	0	0	0	0.6337	0.5	0.507	0.2277	0.4304	0.8182	0	0	0.5579	84
IFI6	Candidate gene	0.8515	0.5789	0.4356	0.3659	0.6186	0.6129	0.1728	0	0	0.2525	0.6875	0.6667	0	0	0.7231	0	0.9155	0	0	0	0.6238	0.1782	0.7426	0.5842	0.8317	0.5248	0.6337	0.5446	0.5743	0.9107	0.7571	0.9429	0.8429	0.2121	0.6337	0.5	0.507	0.6436	0.4051	0.9773	0.6629	0.5909	0.5579	85
DNAJC8	Candidate gene	0.8614	0.9579	0.9307	0.4512	0.6186	0.6129	0.9259	0	0	0.7071	0.6875	0.6667	0	0.625	0.7231	0.74	0.9155	0	0	0	0.6238	0.3861	0.3069	0.5842	0.3366	0.5248	0.6337	0.5446	0.4257	0	0	0	0	0.5455	0.1782	0	0.507	0.6436	0.3038	0.8977	0.8652	0.5909	0.5579	86
UPK3A	Candidate gene	0.8713	0.4632	0.2475	0.6463	0.6186	0	0.1728	0	0.6296	0.697	0	0	0	0	0	0	0.7042	0.6364	0.8889	0.8667	0.6238	0.8515	0.7426	0.5842	0.8317	0.5248	0.6337	0.5446	0.8614	0.5893	0.6429	0.3571	0.9857	0.6768	0.6337	0.5	0.507	0.6436	0.7595	0.2841	0.9326	0.5909	0.5579	87
ARMC12	Candidate gene	0.8812	0	0.5941	0	0.6186	0.6129	0	0	0	0.9293	0	0	0	0	0	0	0.9155	0	0	0	0.6238	0.8515	0.7426	0.5842	0.8317	0.5248	0.6337	0.5446	0.8614	0	0	0	0	0.5455	0.6337	0.5	0.507	0.6436	0.6456	0.8182	0	0	0.5579	88
ANKFN1	Candidate gene	0.8911	0	0.9307	0	0.6186	0.6129	0.5309	0	0	0.9798	0	0	0	0	0	0	0.7746	0	0	0	0.6238	0.8515	0.7426	0.5842	0.8317	0.5248	0.6337	0.5446	0.8614	0	0	0	0	0.6162	0.6337	0.5	0.507	0.6436	0.3797	0.4318	0.3933	0.5909	0.5579	89
CEP85L	Candidate gene	0.901	1	0.5941	0	0	0	0.7654	0	0	0.798	0	0	0	0	0	0	0.5634	0	0	0	0.6238	0.3069	0.7426	0.5842	0.2871	0.5248	0.6337	0.5446	0.3366	0	0	0	0	0.4141	0.6337	0.5	0.507	0.6436	0.9367	0.8182	0	0	0.5579	90
FCN3	Candidate gene	0.9109	0.5684	0.1683	0.7195	0.6186	0.6129	0.5309	0	0.6296	0	0	0	0	0	0	0	0.3803	0.6364	0	0.8667	0.6238	0.8515	0.7426	0.5842	0.8317	0.5248	0.6337	0.5446	0.8614	0.3571	0.9714	0.2	1	0.3939	0.6337	0.5	0.507	0.6436	0.7215	0.625	0.8876	0.5909	0.5579	91
SRRM3	Candidate gene	0.9208	0	0.9307	0	0.6186	0.6129	0.7654	0	0	0.8081	0	0	0	0	0	0	0	0	0	0	0.6238	0.8515	0.7426	0.5842	0.8317	0.5248	0.6337	0.5446	0.8614	0	0	0	0	0.8384	0.1782	0	0	0.6436	0	0	0	0.5909	0.5579	92
FAM118A	Candidate gene	0.9307	0.9158	0.4653	0.5244	0	0.6129	0	0	0	0.9495	0	0	0	0	0	0	0.9155	0	0	0	0.6238	0.8515	0.7426	0.5842	0.8317	0.5248	0.6337	0.5446	0.8614	0	0.2143	0.7286	0.8571	0.5455	0.1782	0.5	0.507	0.6436	0.4684	0.8182	0.8764	0.5909	0.5579	93
GPN2	Candidate gene	0.9406	0.9789	0.9307	0	0.6186	0.6129	0	0	0	0.9091	0	0	0	0	0	0	0	0	0	0	0.6238	0.2277	0.7426	0.5842	0.8317	0.5248	0.6337	0.5446	0.2178	0	0.8	0.6429	0.3857	0.8384	0.6337	0.5	0	0.6436	0.481	0.2386	0.7416	0.5909	0.5579	94
TMEM132E	Candidate gene	0.9505	0.9158	0.3663	0	0.6186	0	0.1728	0	0	0.9899	0	0	0	0	0	0	0.3944	0	0	0	0.6238	0.8515	0.7426	0.5842	0.8317	0.5248	0.6337	0.5446	0.8614	0	0	0	0	0.6465	0.6337	0.5	0.507	0.6436	0.962	0.0568	0.5056	0.5909	0.5579	95
PLEKHM2	Candidate gene	0.9604	0.7368	0.9307	0.9634	0.6186	0.6129	0.9259	0	0	0.9596	0	0	0	0	0.7231	0	0	0	0.7778	0	0.6238	0.8515	0.198	0.5842	0.2277	0.5248	0.1881	0.5446	0.1881	0.25	0.5429	0.7857	0.5714	0.5152	0.1782	0.5	0	0.6436	0.9747	0.6932	0.618	0.5909	0.5579	96
GPR3	Candidate gene	0.9703	0.6421	0.3663	1	0.6186	0.6129	0.1728	0	0	0.9697	0	0.6667	0	0	0.7231	0	0.7606	0	0.9365	0	0.6238	0.3465	0.7426	0.5842	0.8317	0.5248	0.6337	0.5446	0.3762	0.875	0.7	0.8	0.3429	0.4545	0.6337	0.5	0	0.6436	0.7342	0.875	0.2022	0.5909	0.5579	97
MED18	Candidate gene	0.9802	0.8421	0.9307	0	0.6186	0.6129	0.7654	0	0	0.5859	0.6875	0	0	0	0.7231	0	0	0	0.9841	0	0.2376	0.6535	0.7426	0.5842	0.6139	0.5248	0.6337	0.5446	0.6931	0	0.5143	0.7	0.9286	0.8384	0.6337	0.5	0	0.6436	0.7848	0.3295	0.9551	0.5909	0.5579	98
GPATCH3	Candidate gene	0.9901	0.9789	0.9307	0	0.6186	0.6129	0	0	0	0.8687	0	0	0	0	0	0	0	0	0	0	0.6238	0.8515	0.7426	0.5842	0.8317	0.5248	0.6337	0.5446	0.8614	0	0.2429	0.8143	0.9143	0.8384	0.6337	0	0.507	0.6436	0	0.4318	0.9663	0.5909	0.5579	99
SRRM3	Candidate gene	1	0	0.9307	0	0.6186	0.6129	0.7654	0	0	0.8081	0	0	0	0	0	0	0	0	0	0	0.6238	0.8515	0.7426	0.5842	0.8317	0.5248	0.6337	0.5446	0.8614	0	0	0	0	0.8384	0.1782	0	0.507	0.6436	0.9873	1	0	0.5909	0.5579	100

## Sheet: Racing_CNS
Gene name	Group	P-value	Annotation â€“ Gene Ontology	Annotation â€“ UniProt	Text-mining	Annotation â€“ InterPro	Annotation â€“ Pfam	Annotation â€“ SIMAP (localization)	Annotation â€“ DrugBank	Annotation â€“ Stitch	Annotation â€“ RGD ChEBI	Annotation â€“ Reactome	Annotation â€“ WikiPathways	Annotation â€“ RGD pathways	Annotation â€“ BioCarta	Annotation â€“ CPDB	Annotation â€“ hiPathDB	Annotation â€“ GAD	Annotation â€“ OMIM	Annotation â€“ RGD MP	Annotation â€“ RGD RDO	Interaction â€“ String	Interaction â€“ BioGrid	Interaction â€“ I2D	Interaction â€“ IntAct	Interaction â€“ iRefIndex	Interaction â€“ Mint	Interaction â€“ HPRD	Interaction â€“ MIPS	Interaction â€“ GeneRIF	Expression â€“ Su et al (2002)	Expression â€“ Su et al (2004)	Expression â€“ CMAP	Expression â€“ Lukk et al	Annotation â€“ PaGenBase	Annotation â€“ CGAP	Annotation â€“ GNF	Annotation â€“ eGenetics	Blast	Precalculated â€“ Ouzounis	Precalculated â€“ Prospectr	Precalculated â€“ HaploPred	Annotation â€“ Aura	Annotation â€“ mirZ	id
LTB	Training gene	0.0056	0.0238	0.0223	0.029	0.0241	0.0296	0.1449	0	0	0.0514	0	0	0.0625	0	0.0367	0.0649	0.0305	0	0.0465	0	0.0335	0.0503	0.0503	0.0391	0.0503	0.514	0.0503	0.0279	0.0503	0.1263	0.7167	0.0417	0.075	0.0229	0.0565	0	0	0.0391	0	0	0.8089	0.0252	0.0465	0
GRIN1	Training gene	0.0223	0.2262	0.1564	0.1159	0.0663	0.0592	0.1449	0.0435	0.0225	0.16	0.1143	0.0208	0.3438	0.0962	0.1376	0.3506	0.1908	0.1176	0.1512	0.0213	0.0726	0.0503	0.0503	0.0391	0.0503	0.0168	0.0503	0.0279	0.0503	0.0421	0.025	0.0083	0.0167	0.4971	0.6102	0.5	0.5036	0.0391	0.1837	0.2174	0.3503	0.0755	0.0174	3
BDNF	Training gene	0.0559	0.1012	0.1006	0.087	0.0783	0.0947	0.1449	0	0.0112	0.0514	0	0.1458	0.1875	0.0385	0.1193	0.4156	0.0916	0.0294	0.1395	0.1277	0.0279	0.0503	0.0503	0.0391	0.0503	0.0168	0.0503	0.5251	0.0503	0.0316	0.225	0.0833	0.175	0.5829	0.6102	0.5	0.5036	0.0391	0.0136	0.4596	0.0637	0.1195	0.5465	9
CXCL12	Training gene	0.0615	0.0655	0.0615	0.1377	0.1265	0.1006	0.5072	0.3913	0.1236	0.0514	0.0429	0.2083	0.1406	0.0192	0.0826	0.1299	0.0687	0.1471	0	0.1489	0.0838	0.0503	0.0503	0.0391	0.0503	0.0168	0.0503	0.5251	0.0503	0.0947	0.5	0.1417	0.1917	0.1371	0.6102	0.5	0.5036	0.0894	0.0748	0.677	0.1465	0.1006	0.0174	10
GRM1	Training gene	0.067	0.1786	0.1564	0.1304	0.0602	0.0651	0.1449	0.2609	0.1348	0.1829	0.0714	0.0417	0.3125	0.1538	0.1651	0.2857	0.145	0.0882	0.1163	0.2979	0.0615	0.0503	0.0503	0.5587	0.0503	0.0168	0.0503	0.5251	0.0503	0.0632	0.0583	0.0167	0.025	0.1486	0.6102	0.5	0.5036	0.0391	0.0068	0.2174	0.3248	0.5597	0.5465	11
NPY	Training gene	0.0726	0.0952	0.3966	0.1232	0.0964	0.0888	0.1449	0.3478	0.1798	0.1086	0.0143	0	0.6406	0	0.1468	0.1558	0.084	0	0.4419	0.0851	0.0056	0.0503	0.0503	0.0391	0.0503	0.0168	0.0503	0.5251	0.0503	0.0737	0.4083	0.05	0.0417	0.4057	0.6102	0.5	0.5036	0.1117	0.034	0.441	0.1592	0.5597	0.5465	12
GAL	Training gene	0.0782	0.125	0.1229	0.1087	0.0723	0.071	0.1449	0	0.0899	0.1257	0.0143	0	0	0.1923	0.1835	0.1429	0.229	0	0.186	0.1064	0.0056	0.0503	0.0503	0.5587	0.0503	0.514	0.0503	0.5251	0.0503	0.2316	0.3333	0.1	0.1333	0.5029	0.6102	0.5	0.5036	0.095	0.3061	0.441	0.1338	0.5597	0.5465	13
KIF5C	Training gene	0.0838	0.369	0.7542	0.0652	0.0843	0.0769	0.8986	0	0	0.2686	0	0	0	0	0.2661	0	0.6031	0	0.5698	0	0.6201	0.0503	0.0503	0.0391	0.0503	0.514	0.0503	0.5251	0.0503	0	0.175	0.2083	0.0083	0.3886	0.6102	0.5	0	0.0391	0.5442	0.3292	0.1019	0.0755	0.0465	14
CYP2D6	Training gene	0.0894	0.625	0.7039	0.1522	0.1024	0.5503	0.1449	0.087	0.1685	0.0514	0.1	0.0625	1	0.0577	0.3761	0.4416	0.1069	0.0588	0	0.4043	0.2123	0.0503	0.0503	0.5587	0.0503	0.514	0.581	0.5251	0.0503	0.1895	0	0	0	0.2114	0.6102	0	0.5036	0.0391	0.1088	0.1801	0	0	0.5465	15
TNFSF4	Training gene	0.095	0.0536	0.0503	0.0797	0.0542	0.0296	0.3478	0	0.1573	0.1486	0	0	0	0	0.6881	0.0649	0.1221	0.1765	0.5349	0.766	0.2123	0.8324	0.0503	0.5587	0.0503	0.514	0.0503	0.5251	0.0503	0.0842	0.1333	0.0667	0.2	0.1943	0.6102	0.5	0.5036	0.0838	0.8639	0.9627	0.4522	0.5597	0.5465	16
PRKCA	Candidate gene	0.1006	0.0833	0.3687	0.2101	0.5663	0.5503	0	0.7391	0.1011	0.0514	0.2571	0.125	0.3281	0.1731	0.1284	0.2597	0.1298	0.5882	0.7791	0.0638	0.0223	0.4581	0.2123	0.5587	0.4134	0.514	0.1453	0.5251	0.4804	0.1579	0.2333	0.75	0.225	0.2286	0.6102	0.5	0.5036	0.6034	0.1293	0.0062	0.0701	0.5597	0.0465	17
CASP8	Candidate gene	0.1061	0.0595	0.2067	0.2246	0.5663	0.5503	0.7174	0	0.0674	0.0514	0.7	0.1667	0.2344	0.6154	0.1927	0.3117	0.1603	0.5882	0.1279	0.4894	0.0559	0.6145	0.3464	0.5587	0.5531	0.514	0.162	0.5251	0.5754	0.3263	0.6833	0.3833	0.125	0.0686	0.1638	0.5	0.5036	0.6034	0.1701	0.4783	0.4204	0.5597	0.5465	18
KIF5C	Training gene	0.1117	0.369	0.7542	0.0652	0.0843	0.0769	0.8986	0	0	0.2686	0	0	0	0	0.2661	0	0.6031	0	0.5698	0	0.6201	0.0503	0.7207	0.5587	0.0503	0.514	0.0503	0.5251	0.0503	0	0	0	0	0.3886	0.6102	0	0	0.0391	0	0	0.1019	0.0755	0.0465	19
CHRNA3	Candidate gene	0.1173	0.131	0.1564	0.2536	0.5663	0.5503	0.1449	0.1739	0.5955	0.2457	0.3571	0.6458	0	0	0.3394	0.3766	0.3893	0.5882	0.2209	0.2128	0.1844	0.8324	0.7207	0.5587	0.1788	0.514	0.581	0.5251	0.2235	0.6842	0.425	0.15	0.325	0.0857	0.0565	0.5	0.5036	0.6034	0.102	0.0497	0.4395	0.5597	0.5465	20
CSPG4	Candidate gene	0.1229	0.1488	0.2793	0.5435	0.5663	0.5503	0.1449	0	0	0.3714	0.7	0	0	0.6154	0.1009	0	0.6412	0	0.2093	0.0426	0.6201	0.3073	0.2179	0.5587	0.3408	0.514	0.581	0.5251	0.5196	0.8211	0.4333	0.1667	0.5667	0.5086	0.6102	0.5	0.5036	0.6034	0.2721	0.0248	0.7389	0.5597	0.5465	21
PML	Candidate gene	0.1285	0.0893	0.7039	0.3116	0.5663	0.5503	0.7174	0	0.5955	0.3371	0.7	0.6458	0.2813	0.6154	0.6881	0.7403	0.2901	0.5882	0.6977	0	0.2235	0.6425	0.4022	0.1173	0.5642	0.514	0.581	0.5251	0.6648	0.6211	0.1417	0.475	0.575	0.0971	0.6102	0.5	0.5036	0.1899	0.0204	0.7888	0.7643	0.5597	0.0174	22
HSPD1	Candidate gene	0.1341	0.0714	0.3352	0.3478	0.5663	0.5503	0.5072	0	0.5955	0.12	0.7	0.6458	0.2031	0.6154	0.3578	0	0.2824	0.5882	0.8023	0.3404	0.2067	0.6034	0.3128	0.5587	0.3687	0.514	0.1341	0.5251	0.4358	0	0	0	0	0.7943	0.1638	0	0.5036	0.6034	0.1224	0.1553	0.0191	0.5597	0.5465	23
NPTN	Candidate gene	0.1397	0.1845	0.095	0.5507	0.5663	0.5503	0.1449	0	0	0.4629	0	0	0	0	0	0	0.8473	0	0	0	0.6201	0.4358	0.1061	0.5587	0.2402	0.514	0.581	0.5251	0.4972	0.0105	0.3083	0.2417	0.6	0.7943	0.6102	0.5	0.5036	0.6034	0.2109	0.559	0.465	0.5597	0.5465	24
CSK	Candidate gene	0.1453	0.119	0.7821	0.2464	0.5663	0.5503	0	0.7391	0.5955	0.1943	0.1714	0.6458	0.2656	0.1154	0.6881	0.2727	0.1679	0	0.2674	0.6383	0.6201	0.4358	0.3408	0.5587	0.5978	0.514	0.581	0.5251	0.6313	0.2	0.9417	0.375	0.1667	0.1429	0.1638	0.5	0.5036	0.6034	0.1497	0.1553	0.0955	0.5597	0.5465	25
PTEN	Candidate gene	0.1508	0.1071	0.8994	0.4348	0.5663	0.5503	0	0	0.0449	0.0514	0.3	0.6458	0.2813	0.6154	0.6881	0.2468	0.2137	0.5882	0.1047	0.1915	0.0503	0.6089	0.2961	0.5587	0.4525	0.514	0.581	0.5251	0.648	0	0	0	0	0.1886	0.6102	0	0	0.6034	0.0408	0.7205	0	0.5597	0.5465	26
CHRNB4	Candidate gene	0.1564	0.3036	0.2793	0.3043	0.5663	0.5503	0.1449	0.1739	0.5955	0.3143	0.3571	0.6458	0	0	0.367	0.3766	0.2748	0	0.314	0	0.1006	0.8324	0.7207	0.5587	0.3184	0.514	0.581	0.5251	0.3966	0.4947	0.5583	0.0583	0.6417	0.7943	0.6102	0.5	0.5036	0.6034	0.2517	0.0497	0.7197	0.5597	0.5465	27
CNTN1	Candidate gene	0.162	0.1667	0.1061	0.3841	0.5663	0.5503	0.5072	0	0.5955	0.2114	0.1714	0	0.4844	0.6154	0.6881	0.7403	0.1832	0.5882	0.4302	0.5957	0.6201	0.8324	0.2235	0.5587	0.8045	0.514	0.581	0.5251	0.5978	0.7789	0.0917	0.85	0.05	0.48	0.6102	0.5	0.5036	0.6034	0.1769	0.0497	0.3822	0.5597	0.5465	28
TIAL1	Candidate gene	0.1676	0.4345	0.5754	0.6739	0.5663	0.5503	0	0	0.5955	0.4971	0	0	0	0.6154	0	0.7403	0	0	0.8023	0	0.6201	0.486	0.3911	0.5587	0.2737	0.514	0.581	0.5251	0.5363	0.5895	0.675	0.575	0.2583	0.2057	0.6102	0.5	0	0.6034	0.2925	0.6335	0.3376	0.5597	0.5465	29
CHRNA5	Candidate gene	0.1732	0.3452	0.2793	0.2319	0.5663	0.5503	0.1449	0.1739	0.5955	0.2571	0.3571	0.6458	0	0	0.3394	0.3766	0.3969	0.5882	0.7558	0.8936	0.1564	0.2123	0.7207	0.5587	0.1788	0.514	0.581	0.5251	0.1453	0.7474	0.25	0.5083	0.5917	0.1829	0.6102	0.5	0.5036	0.6034	0.0884	0.2174	0.949	0.5597	0.5465	30
CYP1A2	Candidate gene	0.1788	0.3095	0.2291	0.1594	0.1145	0.5503	0.1449	0.3043	0.5955	0.0514	0.2714	0.0833	0.9844	0.6154	0.3303	0.4675	0.0992	0.5882	0.3721	0.5532	0.1453	0.1006	0.7207	0.5587	0.8045	0.514	0.581	0.5251	0.1061	0.5263	0.8917	0.525	0.7667	0.28	0.6102	0.5	0.5036	0.1061	0.6667	0.0497	0.9045	0.5597	0.5465	31
GRK5	Candidate gene	0.1844	0.506	0.7821	0.2609	0.5663	0.5503	0	0	0.5955	0.2229	0.0857	0.6458	0.9531	0.6154	0.2018	0.1818	0.4427	0	0.3488	0.4255	0.067	0.6201	0.3017	0.5587	0.3631	0.514	0.581	0.5251	0.6034	0.7263	0.475	0.7833	0.65	0.08	0.6102	0.5	0	0.6034	0	0.5031	0.3312	0.5597	0.5465	32
LINGO1	Candidate gene	0.1899	0.2083	0.1564	0.3986	0.5663	0.5503	0.1449	0	0.5955	0.4171	0.1714	0	0	0.1346	0.2936	0.3377	0.8473	0	0.7326	0	0.0894	0.8324	0.2458	0.5587	0.8045	0.514	0.581	0.5251	0.8436	0	0	0	0	0.5257	0.6102	0.5	0.5036	0.6034	0.4082	0.2174	0.0892	0.5597	0.0174	33
NEO1	Candidate gene	0.1955	0.2738	0.1564	0.7174	0.5663	0.5503	0.1449	0	0	0.36	0.7	0	0	0.6154	0.6881	0	0.8473	0	0.7093	0	0.1229	0.1397	0.1508	0.5587	0.3966	0.514	0.581	0.5251	0.2905	0.4526	0.0333	0.8917	0.4667	0.56	0.6102	0.5	0.5036	0.6034	0.1633	0.2671	0.4013	0.5597	0.5465	34
CCNB1	Candidate gene	0.2011	0.1429	0.8994	0.5797	0.5663	0.5503	0.5072	0	0.1011	0.0514	0.7	0.6458	0.7813	0.6154	0.6881	0.7403	0.8473	0	0	0.2553	0.1341	0.6313	0.4078	0.5587	0.5251	0.514	0.1564	0.5251	0.6592	0.4211	0.85	0.325	0.375	0.1543	0.1638	0.5	0.5036	0.6034	0.3946	0.4783	0.0064	0.5597	0.5465	35
BAG3	Candidate gene	0.2067	0.256	0.8994	0.4928	0.5663	0.5503	0.6377	0	0.5955	0.2286	0	0.6458	0	0	0.6881	0	0.3282	0.5882	0.1977	0.1702	0.162	0.5922	0.1285	0.1061	0.1676	0.514	0.1006	0.5251	0.2682	0	0.6917	0.5417	0.3333	0.7943	0.6102	0.5	0	0.6034	0.4966	0.7888	0.1274	0.5597	0.5465	36
DKK1	Candidate gene	0.2123	0.0774	0.1117	0.2899	0.5663	0.5503	0.5072	0	0.5955	0.1143	0	0	0.4844	0.6154	0.6881	0.7403	0.2595	0	0.1744	0.4681	0.162	0.8324	0.7207	0.5587	0.2961	0.514	0.581	0.5251	0.3408	0.1158	0.875	0.625	0.3083	0.7943	0.6102	0.5	0	0.6034	0.3741	0.0497	0.4841	0.5597	0.5465	37
IREB2	Candidate gene	0.2179	0.2321	0.8994	0.5	0.5663	0.5503	0	0	0.5955	0.4	0	0.6458	0	0.6154	0.6881	0	0.5725	0	0.3372	0.2766	0.6201	0.3687	0.7207	0.5587	0.3575	0.514	0.581	0.5251	0.3966	0.7895	0.5667	0.5333	0.7083	0.1029	0.6102	0.5	0.5036	0.6034	0.5306	0.7205	0.5605	0.5597	0.0756	38
TSPAN3	Candidate gene	0.2235	0.8631	0.1564	0	0.5663	0.5503	0.1449	0	0	0.64	0	0	0	0	0	0	0	0	0	0	0.6201	0.2123	0.1732	0.5587	0.2402	0.514	0.581	0.5251	0.2905	0.1474	0.525	0.2167	0.4917	0.7943	0.1638	0.5	0.5036	0.6034	0.483	0.7578	0.2994	0.0755	0.5465	39
PTGES	Candidate gene	0.2291	0.5357	0.4469	0.3406	0.5663	0.5503	0.1449	0	0.5955	0.1314	0.7	0.6458	0.4844	0.6154	0.6881	0.2987	0.1374	0	0.6628	0.4468	0.6201	0.2123	0.7207	0.5587	0.8045	0.514	0.581	0.5251	0.3408	0	0	0	0	0.7943	0.1638	0.5	0.5036	0.6034	0.5578	0.441	0.8408	0.5597	0.5465	40
SPOCK1	Candidate gene	0.2346	0.1548	0.1117	0.3188	0.5663	0.5503	0.5072	0	0.5955	0.4914	0	0.6458	0	0	0.6881	0	0.8473	0	0.9302	0	0.6201	0.1397	0.3184	0.5587	0.4302	0.514	0.1117	0.5251	0.2235	0.2842	0.3583	0.7417	0.0917	0.36	0.6102	0.5	0.5036	0.6034	0.7211	0.1801	0.3885	0.5597	0.0756	41
POLR2E	Candidate gene	0.2402	0.4226	0.3352	0.587	0.5663	0.5503	0	0	0.5955	0.5829	0.7	0.6458	0.1563	0.6154	0.3119	0.7403	0.8473	0	0	0	0.6201	0.6536	0.4358	0.5587	0.6034	0.514	0.581	0.5251	0.6872	0.6947	0.7833	0.2917	0.6167	0.7943	0.1638	0.5	0.5036	0.6034	0.7007	0.354	0.2166	0.5597	0.5465	42
PDHX	Candidate gene	0.2458	0.75	0.5754	0.6594	0.5663	0.5503	0.7174	0	0.5955	0.3429	0.7	0.6458	0.7813	0.6154	0.6881	0.7403	0.3817	0.5882	0	0	0.6201	0.4916	0.2682	0.5587	0.419	0.514	0.581	0.5251	0.5587	0.4	0.0833	0.1833	0.7167	0.4457	0.1638	0.5	0.5036	0.6034	0.0544	0.3789	0.9936	0.5597	0.5465	43
CACUL1	Candidate gene	0.2514	0.4821	0.5754	0	0.5663	0.5503	0	0	0	0	0	0	0	0	0	0	0.2672	0	0	0	0.6201	0.2626	0.7207	0.5587	0.1788	0.514	0.581	0.5251	0.2235	0	0	0	0	0	0.6102	0.5	0.5036	0.6034	0.2585	0.6646	0	0	0.0756	44
RGS10	Candidate gene	0.257	0.7143	0.5754	0.3623	0.5663	0.5503	0.7174	0	0.5955	0.4686	0	0.6458	0	0	0.1743	0	0.8473	0	0.407	0	0.0168	0.3296	0.1508	0.5587	0.2402	0.514	0.1229	0.5251	0.2458	0.3368	0.8667	0.8167	0.2167	0.2	0.6102	0.5	0	0.6034	0.5034	0.6087	0.7261	0.5597	0.5465	45
PKM	Candidate gene	0.2626	0.5655	0.2067	0.5725	0.5663	0.5503	0.7174	0.7391	0.0562	0.1714	0.7	0.2083	0.7813	0.6154	0.6881	0.4026	0.8473	0	0.8488	0	0.6201	0.5698	0.3743	0.5587	0.5754	0.514	0.581	0.5251	0.5698	0.2947	0.55	0.5833	0.7917	0	0.0565	0.5	0.5036	0.6034	0.3401	0.1553	0	0	0.5465	46
RDX	Candidate gene	0.2682	0.7202	0.7039	0.7101	0.5663	0.5503	0.8986	0.7391	0.5955	0.4057	0.7	0.6458	0	0	0.6881	0.7403	0.3511	0.5882	0.5	0.7447	0.2291	0.5028	0.2291	0.5587	0.3799	0.514	0.581	0.5251	0.4246	0.8	0.625	0.3	0.3417	0.7943	0.6102	0.5	0.5036	0.6034	0.3878	0.3416	0.2038	0.1069	0.5465	47
ACER3	Candidate gene	0.2737	0.6131	0.1564	0.0942	0.5663	0.5503	0.3478	0	0.5955	0.6286	0.7	0	0.4844	0.6154	0.6881	0.7403	0.6718	0	0	0	0.6201	0.2123	0.7207	0.5587	0.8045	0.514	0.581	0.5251	0.2235	0	0	0	0	0.7943	0.6102	0.5	0.5036	0.6034	0.6259	0.7205	0	0.5597	0.5465	48
SCAMP5	Candidate gene	0.2793	0.4643	0.4078	0	0.5663	0.5503	0.3478	0	0	0.6	0	0	0	0	0	0	0	0	0	0	0.6201	0.8324	0.7207	0.5587	0.8045	0.514	0.581	0.5251	0.8436	0.0211	0.0083	1	0.0333	0.5314	0.6102	0.5	0.5036	0.6034	0	0.5652	0.2548	0.5597	0.5465	49
PRDX3	Candidate gene	0.2849	0.1726	0.3352	0.4855	0.5663	0.5503	0.5072	0	0.5955	0.1886	0	0.6458	0	0.6154	0.6881	0	0	0	0.4535	0	0.6201	0.3855	0.3184	0.5587	0.352	0.514	0.581	0.5251	0.419	0.5579	0.775	0.725	0.6583	0.7943	0.0565	0.5	0.5036	0.6034	0.9864	0.0807	0.2611	0.5597	0.5465	50
PRKG1	Candidate gene	0.2905	0.2381	0.5754	0.1812	0.5663	0.5503	0.8986	0	0.0337	0.2914	0.7	0.6458	0.9375	0	0.6881	0.4286	0.1145	0	0.3953	0	0.1117	0.8324	0.2458	0.5587	0.4246	0.514	0.1397	0.5251	0.486	0.8526	0.325	0.075	0.525	0.7943	0.6102	0.5	0	0.6034	0.2653	0.3106	0.0127	0.5597	0.5465	51
SEC23IP	Candidate gene	0.2961	0.7381	0.2291	0.558	0.5663	0.5503	0.5072	0	0.5955	0.5657	0	0	0	0	0	0	0.2366	0	0.9767	0	0.6201	0.5363	0.7207	0.5587	0.3184	0.514	0.581	0.5251	0.6313	0.3789	0.3917	0.175	0.25	0.2514	0.6102	0.5	0	0.6034	0.619	0.8323	0.1656	0.5597	0.5465	52
EDC3	Candidate gene	0.3017	0.8214	0.8994	0.9638	0.5663	0.5503	0	0	0.5955	0.72	0.7	0	0	0.6154	0.6881	0.7403	0	0	0	0	0.095	0.2905	0.1732	0.1006	0.2793	0.514	0.1117	0.5251	0.3184	0	0.7	0.55	0.5417	0.1714	0.0056	0.5	0.5036	0.6034	0.4422	0.6646	0.1529	0.1069	0.5465	53
PCK2	Candidate gene	0.3073	0.8214	0.5754	0.3696	0.5663	0.5503	0.7174	0	0.5955	0.1657	0.7	0.6458	0.7813	0.6154	0.2385	0.3247	0.8473	0.5882	0	0.5106	0.6201	0.2123	0.7207	0.5587	0.2402	0.514	0.581	0.5251	0.1453	0.1684	0.9167	0.7	0.5	0.3371	0.6102	0.5	0.5036	0.6034	0.2449	0.1925	0.5287	0.5597	0.5465	54
SLIT1	Candidate gene	0.3128	0.1131	0.2514	0.4638	0.5663	0.5503	0.5072	0	0.5955	0.3314	0.7	0	0	0.2308	0.1009	0.2078	0.8473	0	0.3605	0.3617	0.6201	0.8324	0.7207	0.5587	0.8045	0.514	0.581	0.5251	0.8436	0	0	0	0	0.4914	0.6102	0.5	0.5036	0.6034	0	0.5776	0.1847	0.5597	0.5465	55
ISL2	Candidate gene	0.3184	0.3929	0.8994	0.8623	0.5663	0.5503	0	0	0.5955	0.5943	0	0	0	0	0	0	0	0	0.2791	0	0.6201	0.3073	0.7207	0.5587	0.2011	0.514	0.581	0.5251	0.3966	0	0	0	0	0.24	0.6102	0.5	0.5036	0.6034	0.2245	0.1118	0.1911	0.5597	0.5465	56
GOLT1B	Candidate gene	0.324	0.4583	0.4469	0	0.5663	0.5503	0.1449	0	0	0.2971	0	0	0	0	0	0	0	0	0	0	0.6201	0.1788	0.7207	0.5587	0.2402	0.514	0.581	0.5251	0.1955	0	0.6667	0.425	0.5333	0.7943	0.6102	0.5	0.5036	0.1508	0.898	0.5901	0.5669	0.5597	0.5465	57
ADPGK	Candidate gene	0.3296	0.6607	0.5754	0.5942	0.5663	0.5503	0.5072	0	0.5955	0.6057	0	0.2083	0.7813	0	0.6881	0	0.8473	0	0	0	0.6201	0.2626	0.7207	0.5587	0.8045	0.514	0.581	0.5251	0.3966	0	0.7917	0.3583	0.2083	0.2571	0.1638	0.5	0.5036	0.6034	0.3673	0.7205	0.3121	0.5597	0.0756	58
MCMBP	Candidate gene	0.3352	0.7381	0.5754	0.6667	0.5663	0.5503	0	0	0	0.6171	0	0	0	0	0	0	0.5038	0	0	0	0.6201	0.5866	0.7207	0.5587	0.3966	0.514	0.581	0.5251	0.5866	0	0.6	0.7083	0.35	0.7943	0.6102	0.5	0.5036	0.6034	0	0.3789	0	0	0.5465	59
HSPE1	Candidate gene	0.3408	0.6012	0.3352	0.529	0.5663	0.5503	0.5072	0	0.5955	0.1371	0	0	0	0	0.6881	0	0.8473	0	0	0	0.6201	0.5307	0.3631	0.5587	0.581	0.514	0.581	0.5251	0.5307	0	0	0	0	0.7943	0.1638	0.5	0.5036	0.6034	0.8912	0.2857	0.121	0.5597	0.5465	60
COMMD4	Candidate gene	0.3464	0.7738	0.5754	0	0.5663	0.5503	0	0	0	0.6857	0	0	0	0	0	0	0	0	0	0	0.6201	0.4078	0.7207	0.5587	0.2402	0.514	0.581	0.5251	0.4693	0.6632	0.6167	0.4583	0.425	0.4457	0.0565	0.5	0.5036	0.6034	0.449	0.2795	0.879	0.5597	0.5465	61
NEIL1	Candidate gene	0.352	0.5833	0.8994	0.7391	0.5663	0.5503	0.5072	0.7391	0.5955	0.32	0	0	0.7813	0	0.6881	0	0.4122	0	0.593	0	0.6201	0.3464	0.7207	0.5587	0.8045	0.514	0.581	0.5251	0.3966	0	0.4583	0.2667	0.3167	0.5371	0.6102	0.5	0.5036	0.6034	0.1565	0.3789	0.7134	0.5597	0.5465	62
PAPSS2	Candidate gene	0.3575	0.3393	0.5754	0.2826	0.5663	0.5503	0	0	0.5955	0.24	0.3857	0.6458	0.4844	0	0.6881	0.7403	0.8473	0.5882	0.4767	0.6383	0.6201	0.4525	0.7207	0.5587	0.2961	0.514	0.581	0.5251	0.3687	0.9053	0.8333	0.4667	0.2417	0.7943	0.6102	0.5	0.5036	0.6034	0	0.4099	0.5096	0.5597	0.5465	63
STK17A	Candidate gene	0.3631	0.4464	0.8994	0.3261	0.5663	0.5503	0.7174	0	0.5955	0.3657	0	0	0	0	0	0	0.8473	0	0	0	0.6201	0.2626	0.7207	0.5587	0.1788	0.514	0.581	0.5251	0.2905	0.7579	0.4917	0.6667	0.3667	0.0571	0.6102	0.5	0.5036	0.1844	0.5238	0.6211	0.465	0.5597	0.5465	64
INPP5F	Candidate gene	0.3687	0.2798	0.5754	0.5217	0.5663	0.5503	0.8986	0	0.5955	0.6571	0	0	0	0	0.6881	0	0.5038	0	0.6395	0	0.6201	0.2458	0.7207	0.5587	0.8045	0.514	0.581	0.5251	0.8436	0.1053	0.1667	0.3667	0.1	0.2229	0.6102	0.5	0.5036	0.6034	0	0.3789	0.6815	0.0755	0.5465	65
RCN2	Candidate gene	0.3743	0.9345	0.3352	0.9783	0.5663	0.5503	0.5072	0	0.5955	0.28	0	0.2083	0	0	0.6881	0	0.6489	0	0	0	0.6201	0.1732	0.3799	0.0894	0.1508	0.514	0.581	0.5251	0.1844	0.5789	0.75	0.1917	0.3583	0.4457	0.6102	0.5	0.5036	0.1732	0.8503	0.0497	0.2102	0.5597	0.5465	66
NTN1	Candidate gene	0.3799	0.1964	0.3855	0.7246	0.5663	0.5503	0.1449	0	0.5955	0.7371	0.7	0	0	0.6154	0.1009	0.2078	0.8473	0	0.5233	0	0.0447	0.8324	0.2682	0.5587	0.8045	0.514	0.581	0.5251	0.8436	0	0.4417	0.3417	0.6667	0.7943	0.6102	0.5	0	0.6034	0.9252	0.0124	0.0318	0.5597	0.5465	67
BBS4	Candidate gene	0.3855	0.1607	0.7039	0.4493	0.5663	0.5503	0.8986	0	0	0.6686	0	0	0	0	0	0	0.8473	0.5882	0.1628	0.383	0.1844	0.5587	0.1844	0.5587	0.5363	0.514	0.581	0.5251	0.6089	0.5684	0.5333	0.5167	0.8333	0.1086	0.6102	0.5	0.5036	0.6034	0.2041	0.7205	0.8089	0.5597	0.5465	68
EIF3A	Candidate gene	0.3911	0.6429	0.3352	0.6377	0.5663	0.5503	0.8986	0	0.0674	0.1771	0.7	0.6458	0	0.6154	0.6881	0.7403	0.8473	0	0	0	0.1285	0.648	0.4302	0.5587	0.4972	0.514	0.581	0.5251	0.676	0.6421	0.8083	0.2583	0.2333	0.7943	0.1638	0.5	0	0.6034	0.551	0.6646	0.0382	0.5597	0.5465	69
PKP4	Candidate gene	0.3966	0.3988	0.7039	0.6812	0.5663	0.5503	0.8986	0	0	0.3543	0	0	0	0	0.6881	0	0.8473	0	0.9302	0	0.6201	0.3464	0.2011	0.5587	0.3184	0.514	0.581	0.5251	0.3743	0.2211	0.125	0.25	0.0833	0.2343	0.6102	0.5	0	0.6034	0.2993	0.5342	0.1146	0.5597	0.5465	70
ISLR	Candidate gene	0.4022	0.6071	0.3855	0	0.5663	0.5503	0.5072	0	0	0.5429	0	0	0	0	0	0	0	0	0	0	0.1061	0.8324	0.7207	0.5587	0.8045	0.514	0.581	0.5251	0.8436	0.1368	0.3667	0.125	0.3917	0.7943	0.6102	0.5	0.5036	0.6034	0.6735	0.2484	0.1401	0.5597	0.5465	71
SEMA7A	Candidate gene	0.4078	0.1369	0.3017	0.7971	0.5663	0.5503	0.5072	0	0.5955	0.4514	0.7	0	0	0.6154	0.6881	0.2078	0.6183	0.5882	0.5116	0.8936	0.2402	0.8324	0.2458	0.5587	0.8045	0.514	0.581	0.5251	0.8436	0.9368	0.1833	0.5667	0.2917	0.3771	0.6102	0.5	0.5036	0.6034	0.068	0.0497	0.3694	0.5597	0.5465	72
ATAD1	Candidate gene	0.4134	0.4107	0.7039	0.2029	0.5663	0.5503	0	0	0	0.52	0	0	0	0	0	0	0.8473	0	0.6512	0	0.6201	0.2123	0.3687	0.5587	0.2961	0.514	0.581	0.5251	0.2235	0	0	0	0	0.7943	0.6102	0.5	0	0.6034	0.7891	0.1553	0.293	0.5597	0.5465	73
SIN3A	Candidate gene	0.419	0.2202	0.8994	0.4565	0.5663	0.5503	0.8986	0	0.5955	0.3829	0.7	0.6458	0.2344	0.6154	0.3119	0.7403	0.313	0	0.8837	0	0.1453	0.6592	0.419	0.5587	0.4916	0.514	0.581	0.5251	0.6816	0	0	0	0	0.7943	0.6102	0.5	0.5036	0.6034	0.2313	0.5155	0.0446	0.5597	0.0756	74
RPS28	Candidate gene	0.4246	0.7024	0.3352	0	0.5663	0.5503	0.7174	0	0.5955	0.7714	0.7	0.6458	0	0.6154	0.6881	0.7403	0	0	0	0	0.6201	0.5363	0.3296	0.5587	0.5475	0.514	0.581	0.5251	0.6425	0	0.2	0.9417	0.1167	0.3486	0.0565	0	0	0.6034	0	0	0	0.5597	0.5465	75
DDX11	Candidate gene	0.4302	0.3274	0.5754	0.8188	0.5663	0.5503	0.8986	0	0	0.6114	0.7	0	0	0	0	0	0	0.5882	0.3837	0.6383	0.6201	0.4358	0.7207	0.5587	0.514	0.514	0.581	0.5251	0.4972	0	0.6333	0.5917	0.8	0.0914	0.6102	0.5	0.5036	0.6034	0.8707	0.3789	0.6051	0.5597	0.5465	76
TSPAN9	Candidate gene	0.4358	0.8631	0.2793	0.2681	0.5663	0.5503	0.1449	0	0	0.8971	0	0	0	0	0	0	0.3359	0	0	0	0.6201	0.1061	0.7207	0.5587	0.1229	0.514	0.581	0.5251	0.1117	0.8632	0.4833	0.8	0.5583	0.2629	0.6102	0.5	0.5036	0.6034	0.6122	0.1739	0.6688	0.5597	0.5465	77
ACER3	Candidate gene	0.4413	0.6131	0.1564	0.0942	0.5663	0.5503	0	0	0	0.6286	0	0	0.4844	0.6154	0.6881	0.7403	0.6718	0	0	0	0.6201	0.2123	0.7207	0.5587	0.8045	0.514	0.581	0.5251	0.2235	0	0	0	0	0.7943	0.6102	0	0	0.6034	0	0	0	0.5597	0.5465	78
MAN2C1	Candidate gene	0.4469	0.9345	0.5754	0.6522	0.5663	0.5503	0	0	0.5955	0.7143	0	0	0	0	0.6881	0.7403	0	0	0	0	0.6201	0.4358	0.3911	0.5587	0.5251	0.514	0.581	0.5251	0.4972	0.4316	0.3	0.7583	0.8833	0.2686	0.6102	0.5	0.5036	0.1955	0.585	0.3789	0.3758	0.5597	0.5465	79
PRLHR	Candidate gene	0.4525	0.3333	0.2793	0.1884	0.5663	0.5503	0.2971	0	0	0.9657	0.0571	0.6458	0.2031	0.1923	0.211	0.1688	0.5038	0	0.7674	0.5745	0.0782	0.8324	0.7207	0.5587	0.8045	0.514	0.581	0.5251	0.8436	0	0	0	0	0.56	0.6102	0	0.5036	0.6034	0.6463	0.2733	0.6115	0.5597	0.5465	80
CLIP1	Candidate gene	0.4581	0.5774	0.743	0.5652	0.5663	0.5503	0.5072	0	0.5955	0.3486	0.7	0	0.7813	0.6154	0.6881	0.7403	0.5038	0	0.9767	0	0.6201	0.5754	0.1173	0.5587	0.1453	0.514	0.581	0.5251	0.1899	0.1789	0.1083	0.4333	0.9333	0.7943	0.1638	0.5	0.5036	0.1285	0.1973	0.7888	0.2229	0.5597	0.5465	81
RAB11FIP2	Candidate gene	0.4637	0.6726	0.7821	0.7754	0.5663	0.5503	0.8986	0	0.5955	0.7943	0.7	0	0.7813	0	0.6881	0.7403	0.8473	0	0	0	0.6201	0.5196	0.2682	0.095	0.4581	0.514	0.1285	0.5251	0.5866	0.3053	0.2083	0.4167	0.475	0.4457	0.6102	0.5	0.5036	0.6034	0.6871	0.1118	0.3567	0.5597	0.5465	82
SGMS1	Candidate gene	0.4693	0.5476	0.4078	0.5145	0.5663	0.5503	0.3478	0	0.5955	0.2	0.7	0	0.4844	0.6154	0.6881	0.7403	0.4122	0	0.4651	0.8936	0.6201	0.8324	0.7207	0.5587	0.8045	0.514	0.581	0.5251	0.8436	0.7158	0.5167	0.2833	0.8167	0.7943	0.6102	0.5	0.5036	0.1341	0	0.4224	0.414	0.5597	0.5465	83
MINPP1	Candidate gene	0.4749	0.3869	0.2514	0.3768	0.5663	0.5503	0.5072	0	0.5955	0.5086	0.7	0	0.4844	0	0.2385	0.7403	0.6718	0.5882	0.9302	0.8936	0.6201	0.1397	0.7207	0.5587	0.2402	0.514	0.581	0.5251	0.2905	0.8421	0.9833	0.225	0.3833	0.3657	0.0565	0.5	0	0.6034	0.5918	0.2484	0.051	0.5597	0.5465	84
PSMA4	Candidate gene	0.4804	0.3155	0.2067	0.4058	0.5663	0.5503	0.8986	0.7391	0.5955	0.2514	0.1714	0.6458	0.7813	0.6154	0.6881	0.7403	0.1756	0	0	0	0.2346	0.5978	0.4246	0.5587	0.5922	0.514	0.581	0.5251	0.6704	0.4105	0.8833	0.4833	0.1583	0.7943	0.1638	0.5	0.5036	0.6034	0.9592	0.2857	0.0255	0.5597	0.5465	85
HECW1	Candidate gene	0.486	0.9107	0.8994	0.8333	0.5663	0.5503	0.5072	0	0.5955	0.9029	0	0	0	0	0	0	0.2519	0	0	0	0.6201	0.5084	0.7207	0.5587	0.4413	0.514	0.581	0.5251	0.5419	0.3579	0.075	0.4	0.0583	0.56	0.6102	0.5	0	0.6034	0.6803	0.1118	0.3439	0.5597	0.5465	86
CYP1A1	Candidate gene	0.4916	0.2857	0.7821	0.1739	0.1145	0.5503	0.1449	0.4783	0.5955	0.0514	0.2714	0.0833	0.9688	0.0577	0.2844	0.4545	0.0763	0	0.4884	0.5319	0.1955	0.8324	0.7207	0.5587	0.8045	0.514	0.581	0.5251	0.1453	0.8842	0.9667	0.9917	0.95	0.12	0.6102	0	0	0.1006	0.4558	0.0497	0.9299	0.5597	0.5465	87
SCAMP2	Candidate gene	0.4972	0.6964	0.4469	0.7826	0.5663	0.5503	0.3478	0	0	0.7771	0	0.6458	0	0.6154	0.6881	0.7403	0.8473	0	0	0	0.6201	0.3073	0.7207	0.5587	0.3408	0.514	0.581	0.5251	0.3966	0	0.1917	0.5	0.775	0.7943	0.0565	0.5	0.5036	0.6034	0.8844	0.1118	0.4968	0.5597	0.5465	88
PCLO	Candidate gene	0.5028	0.3512	0.5754	0.1957	0.5663	0.5503	0.8986	0	0	0.9257	0	0	0	0	0.6881	0	0.5878	0	0.6279	0	0.6201	0.8324	0.1955	0.5587	0.8045	0.514	0.581	0.5251	0.8436	0.0526	0.0167	0.7333	0.0667	0.5143	0.6102	0.5	0.5036	0.6034	0	0.646	0.5223	0.5597	0.5465	89
POU2AF1	Candidate gene	0.5084	0.5893	0.3352	0.2174	0.5663	0.5503	0.7174	0	0	0.2171	0	0	0	0	0	0	0.374	0	0.6047	0	0.6201	0.8324	0.7207	0.5587	0.5028	0.514	0.581	0.5251	0.8436	0.2105	0.8417	0.1167	0.2833	0.0514	0.6102	0.5	0	0.6034	0.2381	0.9193	0.6433	0.5597	0.5465	90
SNUPN	Candidate gene	0.514	0.756	0.3352	0.9203	0.5663	0.5503	0.7174	0	0.5955	0.6914	0.7	0	0	0.6154	0.6881	0.7403	0	0	0	0	0.6201	0.5196	0.3575	0.5587	0.514	0.514	0.581	0.5251	0.6201	0.7053	0	0	0	0.2171	0.1638	0.5	0.5036	0.6034	0.4626	0.7205	0.9236	0.5597	0.5465	91
COX5A	Candidate gene	0.5196	0.7381	0.3687	0.8406	0.5663	0.5503	0.5072	0.7391	0.5955	0.2343	0.7	0.6458	0.1563	0.6154	0.3028	0.7403	0.8473	0	0	0	0.6201	0.4637	0.352	0.5587	0.3743	0.514	0.581	0.5251	0.5196	0.7368	0.9	0.6167	0.825	0.7943	0.1638	0.5	0.5036	0.6034	0.7619	0.6335	0.7771	0.5597	0.5465	92
INVS	Candidate gene	0.5251	0.256	0.743	0.8913	0.5663	0.5503	0.5072	0	0	0.7886	0	0	0	0	0	0	0.8473	0.5882	0.2326	0.8936	0.6201	0.4358	0.162	0.5587	0.162	0.514	0.581	0.5251	0.1955	0.8316	0.2833	0.6417	0.7833	0.7943	0.6102	0.5	0.5036	0.6034	0.0272	0.1118	0.2293	0.5597	0.5465	93
ABCC9	Candidate gene	0.5307	0.3214	0.1564	0.2754	0.5663	0.5503	0.3478	0.7391	0.5955	0.2857	0.2429	0	0	0	0.6881	0	0.2443	0.5882	0.6744	0.3191	0.6201	0.8324	0.2011	0.5587	0.8045	0.514	0.581	0.5251	0.8436	0.4421	0.2167	0.0333	0.75	0.7943	0.6102	0.5	0.5036	0.6034	0.9048	0.6832	0.8854	0.5597	0.5465	94
PACSIN2	Candidate gene	0.5363	0.5714	0.7039	0.413	0.5663	0.5503	0.8986	0	0.5955	0.5486	0	0	0	0	0	0	0.6489	0	0	0	0.6201	0.6369	0.1453	0.5587	0.1955	0.514	0.581	0.5251	0.2626	0.8947	0.8	0.4417	0.8083	0.7943	0.6102	0	0.5036	0.6034	0.3333	0.4783	0.4268	0.5597	0.5465	95
ETFA	Candidate gene	0.5419	0.9702	0.2067	0.8986	0.5663	0.5503	0.5072	0	0.5955	0.2629	0.7	0	0.4844	0.6154	0.2385	0.7403	0.3435	0.5882	0	0.8936	0.6201	0.5196	0.7207	0.5587	0.5363	0.514	0.581	0.5251	0.4469	0.4737	0.95	0.3083	0.3	0.7943	0.1638	0.5	0.5036	0.6034	0.0612	0.5155	0.6242	0.5597	0.5465	96
DNAJA4	Candidate gene	0.5475	0.6488	0.7039	0	0.5663	0.5503	0	0	0	0.3771	0	0	0	0	0	0	0.8473	0	0	0	0.6201	0.3464	0.7207	0.5587	0.4804	0.514	0.581	0.5251	0.3408	0	0.2917	0.9833	0.7333	0.4457	0.6102	0.5	0.5036	0.6034	0.5646	0.1118	0.6561	0.5597	0.5465	97
WDR61	Candidate gene	0.5531	0.2679	0.8994	0	0.5663	0.5503	0	0	0	0.56	0	0	0	0	0.6881	0	0.8473	0	0	0	0.6201	0.5531	0.3352	0.5587	0.4637	0.514	0.581	0.5251	0.5419	0.9158	0.8167	0.2	0.5083	0.7943	0.1638	0.5	0.5036	0.6034	0.4354	0.5155	0.2803	0.5597	0.5465	98
LRRC32	Candidate gene	0.5587	0.5298	0.2793	0.6449	0.5663	0.5503	0.1449	0	0	0.6457	0	0	0	0	0	0	0.8473	0	0	0	0.6201	0.8324	0.7207	0.5587	0.8045	0.514	0.581	0.5251	0.8436	0.3684	0.9333	0.025	0.55	0.3771	0.6102	0.5	0.5036	0.6034	0.4694	0.2484	0.535	0	0.5465	99
CYP11A1	Candidate gene	0.5642	0.2917	0.2291	0.1449	0.1145	0.5503	0.7174	0.4348	0.5955	0.0514	0.3286	0.2708	0.4844	0.6154	0.2385	0.7403	0.1985	0.5882	0.3256	0.234	0.1173	0.8324	0.7207	0.5587	0.8045	0.514	0.581	0.5251	0.8436	0.9789	0.9917	0.1083	0.9667	0.7943	0.6102	0.5	0.5036	0.1173	0.0476	0.4783	0.3949	0.5597	0.5465	100
KLHL29	Candidate gene	0.5698	0	0.5754	0	0.5663	0.5503	0.5072	0	0	0.7543	0	0	0	0	0	0	0.3664	0	0	0	0.6201	0.8324	0.7207	0.5587	0.8045	0.514	0.581	0.5251	0.8436	0	0.7417	0.7167	0.6833	0.3086	0.6102	0.5	0.5036	0.1397	0.0952	0.3416	0	0.5597	0.5465	101
ANKRD6	Candidate gene	0.5754	0.5952	0.5754	0.9058	0.5663	0.5503	0.8986	0	0	0.8857	0	0	0	0	0	0	0.2214	0	0	0	0.6201	0.3073	0.2682	0.5587	0.8045	0.514	0.581	0.5251	0.3408	0.5053	0.2417	0.925	0.4333	0.52	0.6102	0.5	0.5036	0.6034	0.1905	0.7888	0.2675	0.5597	0.5465	102
CLK3	Candidate gene	0.581	0.7619	0.5754	0.8478	0.5663	0.5503	0.5072	0.7391	0	0.3943	0	0.6458	0	0	0.6881	0	0	0	0	0	0.6201	0.3352	0.2458	0.1117	0.3184	0.514	0.1117	0.5251	0.3408	0.9895	0.7583	0.7667	0.4083	0.4	0.6102	0.5	0.5036	0.1676	0.5102	0.8199	0.5414	0.0755	0.5465	103
TMEM98	Candidate gene	0.5866	0.8631	0.4469	0	0	0.5503	0.1449	0	0	0.4286	0	0	0	0	0	0	0.8473	0	0.8372	0	0.6201	0.2626	0.7207	0.5587	0.1564	0.514	0.581	0.5251	0.2905	0	0	0	0	0.7943	0.6102	0.5	0.5036	0.6034	0.4014	0.441	0.6688	0.5597	0.5465	104
DCAF11	Candidate gene	0.5922	0.8214	0.5754	0.8696	0.5663	0.5503	0.8986	0	0.5955	0.3257	0	0	0	0	0	0	0	0	0	0	0.6201	0.5642	0.7207	0.5587	0.3966	0.514	0.581	0.5251	0.6201	0.3158	0.5083	0.4917	0.85	0.3029	0.0565	0.5	0.5036	0.6034	0.7687	0.7205	0	0.5597	0.5465	105
ZWINT	Candidate gene	0.5978	0.506	0.8994	0.6087	0	0.5503	0.8986	0	0	0.2057	0.7	0	0	0.6154	0.6881	0.7403	0.5954	0	0	0	0.2011	0.5475	0.7207	0.5587	0.5587	0.514	0.581	0.5251	0.6089	0.5474	0.825	0.675	0.275	0.1657	0.0565	0.5	0.5036	0.6034	0.6327	0.9317	0.172	0.5597	0.5465	106
PRPSAP1	Candidate gene	0.6034	0.7083	0.5754	0	0.5663	0.5503	0.5072	0	0.5955	0.4571	0	0	0	0	0	0	0	0	0	0	0.6201	0.5754	0.3799	0.5587	0.486	0.514	0.581	0.5251	0.6536	0.8737	0.05	0.35	0.9417	0.7943	0.6102	0.5	0.5036	0.6034	0.4898	0.1118	0.9745	0.5597	0.5465	107
TANC2	Candidate gene	0.6089	0.4405	0.5754	0.942	0.5663	0.5503	0.7174	0	0	0.5886	0	0	0	0	0	0	0.5038	0	0.8488	0	0.6201	0.8324	0.1061	0.5587	0.4693	0.514	0.581	0.5251	0.8436	0.5158	0.4	0.7917	0.4417	0.7943	0.6102	0.5	0	0.6034	0.4762	0.3168	0.1783	0.5597	0.5465	108
LOXL1	Candidate gene	0.6145	0.4881	0.7374	0.442	0.5663	0.5503	0.5072	0	0.5955	0.1543	0.7	0	0	0	0.6881	0	0.5038	0.5882	0.686	0.8936	0.6201	0.8324	0.7207	0.5587	0.8045	0.514	0.581	0.5251	0.8436	0.2632	0.975	0.5583	0.1833	0.7943	0.6102	0.5	0.5036	0.6034	0.7347	0.5404	0.0573	0.5597	0.0174	109
ST3GAL4	Candidate gene	0.6201	0.6548	0.0726	0.6159	0.5663	0.5503	0.1449	0	0.5955	0.76	0.1714	0	0.4844	0	0.2385	0.7403	0.313	0	0.5349	0	0.6201	0.1397	0.7207	0.5587	0.2402	0.514	0.581	0.5251	0.2905	0.9684	0.3833	0.875	0.8667	0.4457	0.6102	0.5	0.5036	0.6034	0.7143	0.2981	0.9554	0.5597	0.5465	110
ABLIM3	Candidate gene	0.6257	0.25	0.5754	0.9348	0.5663	0.5503	0	0	0.5955	0.5314	0.7	0	0	0	0.6881	0.2078	0.5038	0	0	0	0.6201	0.8324	0.1341	0.5587	0.8045	0.514	0.581	0.5251	0.8436	0.4842	0.7083	0.8667	0.4833	0.16	0.6102	0.5	0.5036	0.6034	0.7755	0.1118	0.242	0.5597	0.5465	111
B3GNT6	Candidate gene	0.6313	0.8929	0.0726	0	0.5663	0.5503	0.1449	0	0	0.7257	0.7	0	0.4844	0	0.6881	0.7403	0	0	0.2907	0	0.6201	0.2123	0.7207	0.5587	0.8045	0.514	0.581	0.5251	0.8436	0	0	0	0	0.1257	0.6102	0.5	0.5036	0.6034	0	0.4783	0	0	0.5465	112
PEAK1	Candidate gene	0.6369	0.5595	0.8994	0.5362	0.5663	0.5503	0	0	0.5955	0	0	0	0	0	0	0	0	0	0	0	0.6201	0.2626	0.7207	0.5587	0.2961	0.514	0.581	0.5251	0.2905	0	0.4167	0.275	0.45	0.7943	0.6102	0.5	0.5036	0.6034	0.9796	0.646	0	0	0.5465	113
ST7L	Candidate gene	0.6425	0.8452	0.4078	0	0.5663	0.5503	0.3478	0	0	0.44	0	0	0	0	0	0	0	0	0	0	0.6201	0.1397	0.7207	0.5587	0.8045	0.514	0.581	0.5251	0.1453	0	0.7333	0.45	0.7583	0.7943	0.6102	0.5	0.5036	0.6034	0.5714	0.9006	0.3631	0.5597	0.5465	114
ULK3	Candidate gene	0.648	0.4762	0.5754	0.3333	0.5663	0.5503	0.8986	0	0	0.9143	0	0.6458	0.7813	0	0.6881	0.7403	0.5038	0	0	0	0.6201	0.2626	0.7207	0.5587	0.1229	0.514	0.581	0.5251	0.2905	0	0	0	0	0.7943	0.1638	0.5	0	0.6034	0.6939	0.323	0.4904	0.5597	0.5465	115
KIRREL3	Candidate gene	0.6536	0.244	0.1564	0.2971	0.5663	0.5503	0.1449	0	0	0.7429	0.7	0	0	0	0.6881	0	0.2901	0.5882	0	0.6809	0.6201	0.8324	0.7207	0.5587	0.8045	0.514	0.581	0.5251	0.8436	0	0	0	0	0.4857	0.6102	0.5	0	0.6034	0.4286	0.3416	0.8854	0	0.5465	116
ARIH1	Candidate gene	0.6592	0.506	0.8994	0.9493	0.5663	0.5503	0	0	0.5955	0.4114	0.7	0	0	0	0.6881	0	0.4122	0	0	0	0.6201	0.4972	0.7207	0.5587	0.4693	0.514	0.581	0.5251	0.5587	0.7684	0.2583	0.1333	0.875	0.4457	0.6102	0.5	0	0.162	0.7415	0.5155	0.2739	0.5597	0.5465	117
GPR142	Candidate gene	0.6648	0.5238	0.4469	0	0.5663	0.5503	0.3043	0	0	0.8629	0	0	0	0	0	0	0	0	0	0	0.6201	0.1061	0.7207	0.5587	0.8045	0.514	0.581	0.5251	0.1453	0	0	0	0	0.1771	0.6102	0	0	0.6034	0	0	0	0	0	118
YTHDC2	Candidate gene	0.6704	0.8214	0.8994	0.9928	0.5663	0.5503	0	0	0	0.8286	0	0	0	0	0	0	0.313	0	0	0	0.6201	0.4804	0.7207	0.5587	0.3408	0.514	0.581	0.5251	0.5196	0.6	0.3417	0.2333	0.625	0.4457	0.6102	0.5	0.5036	0.6034	0.7075	0.4224	0.2866	0.5597	0.5465	119
COA1	Candidate gene	0.676	0.7262	0.4469	0	0.5663	0.5503	0.1449	0	0	0.6743	0	0	0	0	0	0	0	0	0	0	0.6201	0.3464	0.7207	0.5587	0.2402	0.514	0.581	0.5251	0.3966	0.3474	0.15	0.6333	0.7	0	0.1638	0.5	0.5036	0.6034	1	0.9814	0	0	0.5465	120
SCAPER	Candidate gene	0.6816	0.9345	0.5754	0.913	0.5663	0.5503	0.7174	0	0	0.7086	0	0	0	0	0	0	0.5802	0	0	0	0.6201	0.3687	0.1229	0.5587	0.1397	0.514	0.581	0.5251	0.1453	0.6526	0.0417	0.825	0.2667	0.7943	0.6102	0.5	0.5036	0.6034	0.7551	0.7205	0.6943	0.5597	0.5465	121
C15orf39	Candidate gene	0.6872	0	0.5754	0	0	0	0.7174	0	0	0.68	0	0	0	0	0	0	0	0	0	0	0.6201	0.2123	0.7207	0.5587	0.2961	0.514	0.581	0.5251	0.2235	0.2421	0.2667	0.975	0.4167	0.3771	0.6102	0.5	0.5036	0.6034	0.9184	0.5528	0.7516	0.5597	0.5465	122
RRAGD	Candidate gene	0.6927	0.5417	0.5754	0.4203	0.5663	0.5503	0	0	0.5955	0.5143	0	0.6458	0.7813	0	0.6881	0.7403	0.8473	0	0	0	0.1732	0.4078	0.3017	0.5587	0.3966	0.514	0.581	0.5251	0.4972	0.9263	0.725	0.8083	0.675	0.3486	0.6102	0.5	0.5036	0.6034	0.7279	0.9503	0.5414	0.5597	0.5465	123
PPCDC	Candidate gene	0.6983	0.9107	0.5754	0	0.5663	0.5503	0	0.7391	0.5955	0.7657	0.7	0	0.4844	0.6154	0.6881	0.7403	0.8473	0	0	0	0.6201	0.8324	0.7207	0.5587	0.8045	0.514	0.581	0.5251	0.8436	0	0.8583	0.65	0.6917	0.7943	0.6102	0.5	0.5036	0.6034	0.3265	0.3043	0.4331	0.5597	0.5465	124
RAB35	Candidate gene	0.7039	0.4524	0.7039	0.7899	0.5663	0.5503	0.7174	0	0	0.5714	0	0	0	0	0	0	0.8473	0	0	0	0.6201	0.2849	0.1899	0.5587	0.4413	0.514	0.581	0.5251	0.3408	0.6316	0.5833	0.775	0.8583	0.7943	0.6102	0.5	0.5036	0.6034	0.8435	0.9876	0.1975	0.5597	0.0174	125
CENPH	Candidate gene	0.7095	0.6726	0.8994	0.6304	0.5663	0.5503	0.8986	0	0	0.3086	0.7	0	0	0.6154	0.6881	0.7403	0	0	0	0	0.1397	0.4078	0.7207	0.5587	0.4302	0.514	0.581	0.5251	0.4693	0	0	0	0	0.7943	0.6102	0.5	0.5036	0.6034	0	0.8634	0.6688	0.5597	0.5465	126
ARHGAP20	Candidate gene	0.7151	0.494	0.5754	0.6957	0.5663	0.5503	0.7174	0	0	0.92	0.1714	0	0	0	0.6881	0.7403	0.2061	0	0	0	0.6201	0.8324	0.7207	0.5587	0.8045	0.514	0.581	0.5251	0.8436	0	0	0	0	0.7943	0.6102	0.5	0.5036	0.6034	0.7959	0.3789	0.4459	0.5597	0.5465	127
MPI	Candidate gene	0.7207	0.9702	0.2067	0.7464	0.5663	0.5503	0.5072	0	0.5955	0.8114	0.7	0	0.4844	0.6154	0.6881	0.7403	0.8473	0.5882	0.2442	0.8936	0.1732	0.2123	0.4413	0.5587	0.5866	0.514	0.581	0.5251	0.1453	0.8105	0.6083	0.6083	0.9833	0.4457	0.6102	0.5	0.5036	0.1788	0.1429	0.7205	0.6815	0.5597	0.5465	128
STOML1	Candidate gene	0.7263	0.7976	0.0894	0.9855	0.5663	0.5503	0.1449	0	0	0.88	0	0	0	0	0	0	0	0	0	0	0.6201	0.4078	0.7207	0.5587	0.8045	0.514	0.581	0.5251	0.4246	0.5368	0.1	0.8583	0.1083	0.7943	0.6102	0.5	0.5036	0.6034	0.2789	0.7888	0.4586	0.5597	0.5465	129
MGAT5	Candidate gene	0.7318	0.8929	0.0838	0.6884	0.5663	0.5503	0.1449	0	0.5955	0.5371	0.7	0	0.4844	0	0.6881	0.7403	0.1527	0	0.7907	0	0.6201	0.8324	0.7207	0.5587	0.8045	0.514	0.581	0.5251	0.8436	0.4632	0.275	0.8833	0.9083	0.3371	0.6102	0.5	0.5036	0.6034	0.8367	0.2174	0.9108	0.5597	0.5465	130
PSTPIP1	Candidate gene	0.7374	0.4702	0.5754	0.5072	0.5663	0.5503	0.8986	0	0	0.7829	0.7	0.6458	0.7813	0	0.6881	0.7403	0.4351	0.5882	0.8721	0.8936	0.6201	0.8324	0.1397	0.5587	0.2067	0.514	0.581	0.5251	0.257	0.2526	0.9583	0.4083	0.1417	0.0743	0.6102	0.5	0.5036	0.6034	0.2177	0.882	0.5541	0	0.5465	131
ZC3H12C	Candidate gene	0.743	0.9702	0.8994	0.3551	0.5663	0.5503	0	0	0	0.7486	0	0	0	0	0	0	0.5038	0	0	0	0.6201	0.8324	0.7207	0.5587	0.8045	0.514	0.581	0.5251	0.8436	0	0	0	0	0.28	0.6102	0.5	0.5036	0.6034	0.415	0.0186	0.5924	0.5597	0.5465	132
UBL7	Candidate gene	0.7486	0	0.8994	0.9565	0.5663	0.5503	0	0	0	0.7029	0	0	0	0	0	0	0	0	0	0	0.6201	0.4749	0.7207	0.0782	0.1061	0.514	0.581	0.5251	0.2458	0	0	0	0	0.4457	0.6102	0.5	0.5036	0.6034	0.3469	0.7205	0.8981	0.5597	0.5465	133
ARID3B	Candidate gene	0.7542	0.7917	0.5754	0.6014	0.5663	0.5503	0.7174	0	0	0.8	0	0	0	0	0	0	0.5038	0	0.4186	0	0.6201	0.3073	0.7207	0.5587	0.3966	0.514	0.581	0.5251	0.3408	0	0.7667	0.9667	0.4	0.3371	0.6102	0.5	0.5036	0.6034	0.9116	0.9006	0.4076	0.5597	0.5465	134
CCDC33	Candidate gene	0.7598	0.7738	0.5754	0.4783	0.5663	0.5503	0.7174	0	0	0.9771	0	0	0	0	0	0	0.8473	0	0	0	0.6201	0.6201	0.4134	0.5587	0.5698	0.514	0.1508	0.5251	0.5587	0	0.375	0.3333	0.7417	0.3086	0.6102	0.5	0.5036	0.6034	0.3537	0.8758	0.9172	0.5597	0.5465	135
TBC1D21	Candidate gene	0.7654	0.6845	0.8994	0	0.5663	0.5503	0	0	0	0.84	0	0	0	0	0	0	0	0	0	0	0.6201	0.1397	0.7207	0.5587	0.8045	0.514	0.581	0.5251	0.1453	0	0	0	0	0.7943	0.6102	0.5	0.5036	0.6034	0.6599	0.7888	0.4968	0.5597	0.5465	136
SYT3	Candidate gene	0.7709	0.7976	0.4469	0	0.5663	0.5503	0.3478	0	0.5955	0.6971	0	0	0	0	0	0	0	0	0.9302	0	0.6201	0.8324	0.2905	0.5587	0.8045	0.514	0.581	0.5251	0.8436	0	0	0	0	0.2914	0.6102	0	0.5036	0.6034	0	0	0.5796	0.5597	0.5465	137
STRA6	Candidate gene	0.7765	0.2024	0.1564	0.7029	0.5663	0.5503	0.1449	0	0.5955	0.4457	0.1714	0	0.7813	0	0.6881	0	0.6336	0.5882	0.8256	0.7234	0.6201	0.1397	0.7207	0.5587	0.8045	0.514	0.581	0.5251	0.1453	0	0.65	0.8417	0.975	0.7943	0.6102	0.5	0.5036	0.6034	0.932	0.7888	0.6242	0	0.5465	138
SNX33	Candidate gene	0.7821	0.631	0.8994	0	0.5663	0.5503	0	0	0	0.5543	0	0	0	0	0.6881	0	0	0	0	0	0.6201	0.8324	0.7207	0.5587	0.8045	0.514	0.581	0.5251	0.8436	0	0	0	0	0.7943	0.6102	0.5	0.5036	0.6034	0.6054	0.1118	0.7452	0.5597	0.5465	139
VWC2	Candidate gene	0.7877	0.1905	0.8994	0	0.5663	0.5503	0.5072	0	0	0.6514	0	0	0	0	0	0	0	0	0	0	0.6201	0.8324	0.7207	0.5587	0.8045	0.514	0.581	0.5251	0.8436	0	0	0	0	0.2457	0	0.5	0.5036	0.6034	0	0.5404	0.7261	0.5597	0.5465	140
TSKU	Candidate gene	0.7933	0.3631	0.3855	0	0.5663	0.5503	0.5072	0	0.5955	0.4229	0	0	0	0	0	0	0	0	0.7326	0	0.6201	0.8324	0.7207	0.5587	0.8045	0.514	0.581	0.5251	0.8436	0	0.925	0.95	0.4583	0.7943	0.6102	0.5	0.5036	0.6034	0.517	0.2484	0.4777	0.5597	0.5465	141
B3GNT6	Candidate gene	0.7989	0.8929	0.0726	0	0.5663	0	0	0	0	0.7257	0	0	0.4844	0	0.6881	0.7403	0	0	0.2907	0	0.6201	0.2123	0.7207	0.5587	0.8045	0.514	0.581	0.5251	0.8436	0	0	0	0	0.1257	0.6102	0	0	0.6034	0	0	0	0	0.5465	142
CPLX3	Candidate gene	0.8045	0.4048	0.7821	0	0.5663	0.5503	0.8986	0	0	0.8343	0	0	0	0	0.6881	0	0.5038	0	0.5581	0	0.6201	0.8324	0.7207	0.5587	0.8045	0.514	0.581	0.5251	0.8436	0	0	0	0	0.4114	0.6102	0	0	0.6034	0	0	0.5096	0.5597	0.5465	143
PTPN9	Candidate gene	0.8101	0.8214	0.8994	0.8768	0.5663	0.5503	0	0	0.5955	0.6629	0	0	0	0	0	0	0.8473	0	0.2558	0	0.6201	0.3687	0.2849	0.5587	0.8045	0.514	0.581	0.5251	0.4693	0.3895	0.1583	0.6833	0.9917	0.7943	0.6102	0.5	0.5036	0.6034	0.5986	0.4224	0.3057	0.5597	0.5465	144
MYO9A	Candidate gene	0.8156	0.4286	0.4246	1	0.5663	0.5503	0.8986	0	0.5955	0.3029	0.1714	0	0	0	0.6881	0.7403	0	0	0	0	0.6201	0.8324	0.7207	0.5587	0.8045	0.514	0.581	0.5251	0.8436	0	0.575	0.6583	0.8917	0.56	0.6102	0.5	0.5036	0.6034	0.2857	0.6025	0.0828	0.0755	0.5465	145
FAM219B	Candidate gene	0.8212	0	0.5754	0	0	0.5503	0.5072	0	0	0.9371	0	0	0	0	0	0	0	0	0	0	0.6201	0.1397	0.7207	0.5587	0.8045	0.514	0.581	0.5251	0.1453	0	0	0	0	0.28	0.6102	0	0.5036	0.6034	0.6395	0.9441	0	0	0.5465	146
RPP25	Candidate gene	0.8268	0.8214	0.8994	0.8116	0.5663	0.5503	0	0	0	0.5257	0	0	0.7813	0	0.6881	0	0	0	0	0	0.6201	0.8324	0.7207	0.5587	0.8045	0.514	0.581	0.5251	0.8436	0	0.6417	0.6	0.6083	0.7943	0.6102	0.5	0.5036	0.6034	0.5782	0.913	0.8535	0.5597	0.5465	147
UBE2Q2	Candidate gene	0.8324	0.9702	0.5754	0.8043	0.5663	0.5503	0.8986	0	0.5955	0.8171	0.7	0	0.7813	0	0.6881	0	0.8473	0	0	0	0.6201	0.3966	0.7207	0.5587	0.5084	0.514	0.581	0.5251	0.4469	0	0	0	0	0.7943	0.6102	0.5	0.5036	0.1564	0.3197	0.1988	0.6369	0.5597	0.5465	148
LRRC49	Candidate gene	0.838	0.994	0.7654	0.9275	0.5663	0.5503	0.7174	0	0	0.8457	0	0	0	0	0	0	0.5038	0	0	0	0.6201	0.1397	0.7207	0.5587	0.1229	0.514	0.581	0.5251	0.1453	0	0.3167	0.9083	0.15	0.56	0.6102	0.5	0.5036	0.6034	0.381	0.7888	0.6178	0.5597	0.5465	149
HMCN2	Candidate gene	0.8436	0.5536	0.2514	0	0.5663	0.5503	0.1449	0	0	0.9486	0	0	0	0	0	0	0.3511	0	0	0	0.6201	0.8324	0.7207	0.5587	0.8045	0.514	0.581	0.5251	0.8436	0	0	0	0	0.7943	0.6102	0.5	0.5036	0.6034	0.4218	0.8882	0.7707	0.5597	0.5465	150
NRL	Candidate gene	0.8492	0.2143	0.8994	0.7319	0.5663	0.5503	0.8986	0	0	0.8571	0	0	0	0	0.6881	0	0.8473	0.5882	0.6163	0.8936	0.6201	0.8324	0.7207	0.5587	0.8045	0.514	0.581	0.5251	0.8436	0.9579	0.4667	0.1583	0.5167	0.7943	0.6102	0.5	0	0.6034	0.0816	0.6087	0.0764	0.5597	0.5465	151
MRPS36	Candidate gene	0.8547	0.9107	0.8994	0.7609	0	0	0.5072	0	0	0.48	0	0	0	0	0	0	0	0	0	0	0.6201	0.3855	0.7207	0.5587	0.1229	0.514	0.581	0.5251	0.4469	0	0	0	0	0.7943	0.6102	0.5	0.5036	0.6034	0.8776	0.8634	0.8535	0.5597	0.5465	152
CRABP1	Candidate gene	0.8603	0.381	0.8994	0.7536	0.5663	0.5503	0	0.7391	0.5955	0.4343	0	0.6458	0.7813	0	0.6881	0	0.6183	0	0.8837	0	0.6201	0.8324	0.7207	0.5587	0.8045	0.514	0.581	0.5251	0.8436	0.9474	0.5417	0.8333	0.925	0.3257	0.6102	0.5	0.5036	0.6034	0.8095	0.5652	0.2357	0.5597	0.5465	153
IL31	Candidate gene	0.8659	0.2976	0.0559	0	0	0.5503	0.1449	0	0	0.9714	0	0	0	0	0.6881	0	0.4122	0	0	0	0.6201	0.8324	0.7207	0.5587	0.8045	0.514	0.581	0.5251	0.8436	0	0	0	0	0.7943	0	0	0	0.6034	0	0	0.758	0.5597	0.5465	154
LMAN1L	Candidate gene	0.8715	0.8631	0.1564	0.471	0.5663	0.5503	0.5072	0	0	0.8686	0	0	0.7813	0	0	0	0.5038	0	0	0	0.6201	0.8324	0.7207	0.5587	0.8045	0.514	0.581	0.5251	0.8436	0	0	0	0	0.7943	0.6102	0.5	0.5036	0.6034	0.8163	0.6273	0.9809	0.5597	0.5465	155
A1CF	Candidate gene	0.8771	0.7857	0.5754	0.8841	0.5663	0.5503	0	0	0	0.3886	0.7	0	0	0	0.6881	0.7403	0.8473	0	0.7209	0.6809	0.6201	0.8324	0.7207	0.5587	0.8045	0.514	0.581	0.5251	0.8436	0	0.1167	0.9583	0.8417	0.2914	0.6102	0.5	0.5036	0.6034	0.9388	0.1118	0.5732	0.5597	0.5465	156
SENP8	Candidate gene	0.8827	0.994	0.3352	0	0.5663	0.5503	0	0	0	0.8229	0	0	0	0	0	0	0	0	0	0	0.6201	0.4693	0.7207	0.5587	0.8045	0.514	0.581	0.5251	0.5866	0	0	0	0	0.7943	0.6102	0.5	0.5036	0.6034	0.8571	0.8447	0.707	0.5597	0.5465	157
MRPS36	Candidate gene	0.8883	0.9107	0.8994	0.7609	0	0	0	0	0	0.48	0	0	0	0	0	0	0	0	0	0	0.6201	0.3855	0.7207	0.5587	0.1229	0.514	0.581	0.5251	0.4469	0	0	0	0	0.7943	0.6102	0	0	0.6034	0	0	0.8535	0.5597	0.5465	158
RABL6	Candidate gene	0.8939	0.506	0.2514	0.971	0.5663	0.5503	0.8986	0	0	0.5029	0	0	0	0	0	0	0	0	0	0	0.6201	0.8324	0.7207	0.5587	0.8045	0.514	0.581	0.5251	0.8436	0	0.45	0.9	0.6333	0	0.1638	0.5	0.5036	0.6034	0	0.3789	0	0	0.5465	159
TMEM202	Candidate gene	0.8994	0.8631	0.4469	0	0	0	0.3478	0	0	0.6229	0	0	0	0	0	0	0	0	0	0	0.6201	0.8324	0.7207	0.5587	0.8045	0.514	0.581	0.5251	0.8436	0	0	0	0	0.7943	0.6102	0	0.5036	0.6034	0	0.9006	0.6943	0	0.5465	160
NRG4	Candidate gene	0.905	0.3571	0.3073	0	0.5663	0	0.3478	0	0	0.8514	0.3143	0.6458	0.4844	0.6154	0.156	0.7403	0	0	0.9302	0	0.6201	0.8324	0.1732	0.5587	0.2402	0.514	0.581	0.5251	0.8436	0	0	0	0	0.7943	0.6102	0.5	0.5036	0.6034	0.3605	1	0.9618	0.5597	0.5465	161
CSTF2T	Candidate gene	0.9106	0.9702	0.8994	0.6232	0.5663	0.5503	0	0	0	0.5771	0	0.6458	0.7813	0	0.6881	0	0.6718	0	0.9767	0	0.6201	0.3073	0.7207	0.0838	0.2402	0.514	0.581	0.5251	0.3408	0.6105	0.35	0.3917	0.9583	0.4457	0.6102	0.5	0.5036	0.2011	0.6531	0.9752	0.8726	0.5597	0.5465	162
TMEM71	Candidate gene	0.9162	0.8631	0.4078	0	0	0.5503	0.3043	0	0	0.9086	0	0	0	0	0	0	0.5038	0	0	0	0.6201	0.8324	0.7207	0.5587	0.8045	0.514	0.581	0.5251	0.8436	0	0	0	0	0.0629	0.6102	0	0.5036	0.6034	0.5374	0.7888	0.9682	0.5597	0.5465	163
RILPL2	Candidate gene	0.9218	0.7738	0.8994	0	0.5663	0.5503	0.8986	0	0	0.4743	0	0	0	0	0	0	0	0	0	0	0.6201	0.8324	0.7207	0.5587	0.8045	0.514	0.581	0.5251	0.8436	0	0	0	0	0.7943	0.1638	0.5	0.5036	0.6034	0.7823	0.5776	0.9363	0.5597	0.5465	164
FAM45A	Candidate gene	0.9274	0	0.5754	0	0	0.5503	0	0	0	0.9543	0	0	0	0	0	0	0	0	0	0	0.6201	0.8324	0.7207	0.5587	0.8045	0.514	0.581	0.5251	0.8436	0	0	0	0	0.7943	0.6102	0	0.5036	0.6034	0.8231	0.7205	0	0.5597	0.5465	165
FDX1	Candidate gene	0.933	0.9524	0.8994	0.3913	0.5663	0.5503	0.5072	0.7391	0.5955	0.1429	0.7	0	0.4844	0	0.6881	0	0.5038	0	0	0.8936	0.6201	0.8324	0.7207	0.5587	0.8045	0.514	0.581	0.5251	0.8436	0.6737	1	0.3167	0.725	0.7943	0.6102	0.5	0.5036	0.6034	0.1361	0.5901	0.586	0.5597	0.5465	166
MLXIP	Candidate gene	0.9385	0.6667	0.7039	0.8551	0.5663	0.5503	0.5072	0	0	0.8057	0	0	0	0	0	0	0	0	0	0	0.6201	0.8324	0.2458	0.5587	0.8045	0.514	0.581	0.5251	0.8436	0.2737	0.6583	0.9333	0.9	0.1143	0.6102	0.5	0.5036	0.1229	0.8027	0.9689	0.6497	0.5597	0.5465	167
C11orf53	Candidate gene	0.9441	0	0.8994	0	0	0	0.7174	0	0	0	0	0	0	0	0	0	0.8473	0	0	0	0.6201	0.1397	0.7207	0.5587	0.8045	0.514	0.581	0.5251	0.1453	0	0	0	0	0.32	0.6102	0	0.5036	0.6034	0.966	0.8634	0.3185	0.5597	0.5465	168
PARP6	Candidate gene	0.9497	0.994	0.5754	0.4203	0.5663	0.5503	0	0	0.5955	0.8743	0	0	0	0	0	0	0.8473	0	0	0	0.6201	0.8324	0.7207	0.5587	0.8045	0.514	0.581	0.5251	0.8436	0	0.0667	0.6917	0.5833	0.7943	0.6102	0.5	0.5036	0.1453	0.9524	0.8509	0.5924	0.5597	0.5465	169
LCN15	Candidate gene	0.9553	0.6369	0.8994	0	0.5663	0.5503	0.5072	0	0.5955	0.9314	0	0	0	0	0	0	0	0	0	0	0.6201	0.8324	0.7207	0.5587	0.8045	0.514	0.581	0.5251	0.8436	0	0	0	0	0.56	0.6102	0	0.5036	0.6034	0.3129	0.9938	0	0	0.5465	170
C15orf59	Candidate gene	0.9609	0	0.8994	0	0	0.5503	0.8986	0	0	0.96	0	0	0	0	0	0	0.5038	0	0	0	0.6201	0.8324	0.7207	0.5587	0.8045	0.514	0.581	0.5251	0.8436	0	0	0	0	0.7943	0.6102	0.5	0	0.6034	0	0	0	0.5597	0.5465	171
LRRC43	Candidate gene	0.9665	0	0.5754	0	0.5663	0	0	0	0	0.9943	0	0	0	0	0	0	0	0	0	0	0.6201	0.8324	0.7207	0.5587	0.8045	0.514	0.581	0.5251	0.8436	0	0	0	0	0.56	0.6102	0.5	0.5036	0.6034	0.8299	0.8261	0.9809	0.5597	0.5465	172
C2orf70	Candidate gene	0.9721	0	0.8994	0	0.5663	0.5503	0.6377	0	0	0	0	0	0	0	0	0	0	0	0	0	0.6201	0.8324	0.7207	0.5587	0.8045	0.514	0.581	0.5251	0.8436	0	0	0	0	0.7943	0.6102	0.5	0.5036	0.6034	0.9932	0.9193	0	0.5597	0.5465	173
ODF3L1	Candidate gene	0.9777	0	0.8994	0	0.5663	0.5503	0	0	0	0.9886	0	0	0	0	0	0	0	0	0	0	0.6201	0.8324	0.7207	0.5587	0.8045	0.514	0.581	0.5251	0.8436	0	0	0	0	0.7943	0.6102	0.5	0.5036	0.6034	0.9456	0.4783	0.8662	0.5597	0.5465	174
ALS2CR12	Candidate gene	0.9832	0.6845	0.5754	0.1667	0.5663	0	0.8986	0	0	0.9829	0	0	0	0	0	0	0.8473	0	0	0	0.6201	0.8324	0.1061	0.5587	0.8045	0.514	0.581	0.5251	0.8436	0	0	0	0	0.7943	0.6102	0	0.5036	0.6034	0.1156	0.9317	1	0.5597	0.5465	175
ZPBP	Candidate gene	0.9888	0.4167	0.2514	0.8261	0.5663	0.5503	0.1449	0	0	0.9429	0	0	0	0	0	0	0	0	0.9767	0	0.6201	0.8324	0.7207	0.5587	0.8045	0.514	0.581	0.5251	0.8436	1	0.9083	0.0917	0.9167	0.7943	0.6102	0.5	0.5036	0.6034	0.7483	0.2484	0.2484	0	0.5465	176
FAM204A	Candidate gene	0.9944	0	0.8994	0.2391	0	0	0.8986	0	0	0.8914	0	0	0	0	0	0	0.8473	0	0	0	0.6201	0.8324	0.7207	0.5587	0.8045	0.514	0.581	0.5251	0.8436	0	0.5917	0.9167	1	0.7943	0.6102	0	0	0.6034	0	0.9565	0	0	0.5465	177
CIB4	Candidate gene	1	0.9345	0.8994	0	0.5663	0.5503	0	0	0	1	0	0	0	0	0	0	0.8473	0	0	0	0.6201	0.8324	0.7207	0.5587	0.8045	0.514	0.581	0.5251	0.8436	0	0	0	0	0.7943	0.6102	0.5	0.5036	0.6034	0.9728	0.8385	0.9363	0	0.5465	178

## Sheet: Reining_CNS
Gene name	Group	P-value	Annotation â€“ Gene Ontology	Annotation â€“ UniProt	Text-mining	Annotation â€“ InterPro	Annotation â€“ Pfam	Annotation â€“ SIMAP (localization)	Annotation â€“ DrugBank	Annotation â€“ Stitch	Annotation â€“ RGD ChEBI	Annotation â€“ Reactome	Annotation â€“ WikiPathways	Annotation â€“ RGD pathways	Annotation â€“ BioCarta	Annotation â€“ CPDB	Annotation â€“ hiPathDB	Annotation â€“ GAD	Annotation â€“ OMIM	Annotation â€“ RGD MP	Annotation â€“ RGD RDO	Interaction â€“ String	Interaction â€“ BioGrid	Interaction â€“ I2D	Interaction â€“ IntAct	Interaction â€“ iRefIndex	Interaction â€“ Mint	Interaction â€“ HPRD	Interaction â€“ MIPS	Interaction â€“ GeneRIF	Expression â€“ Su et al (2002)	Expression â€“ Su et al (2004)	Expression â€“ CMAP	Expression â€“ Lukk et al	Annotation â€“ PaGenBase	Annotation â€“ CGAP	Annotation â€“ GNF	Annotation â€“ eGenetics	Blast	Precalculated â€“ Ouzounis	Precalculated â€“ Prospectr	Precalculated â€“ HaploPred	Annotation â€“ Aura	Annotation â€“ mirZ	id
LTB	Training gene	0.0097	0.0404	0.0388	0.05	0.0396	0.051	0.1687	0	0	0.0588	0	0	0.129	0	0.058	0.1463	0.0519	0	0.0952	0	0.0388	0.0874	0.0874	0.068	0.0874	0.5243	0.0874	0.0485	0.0874	0.1458	0.6875	0.0625	0.1406	0.0396	0.0777	0	0	0.068	0	0	0.6915	0.0515	0.0851	0
GRIN1	Training gene	0.0874	0.2626	0.2233	0.2125	0.1089	0.102	0.1687	0.0667	0.0417	0.2255	0.2222	0.0385	0.6129	0.1739	0.1739	0.4634	0.2987	0.129	0.2857	0.0278	0.1068	0.0874	0.0874	0.068	0.0874	0.0291	0.0874	0.0485	0.0874	0.0417	0.0156	0.0156	0.0313	0.4455	0.6699	0.5062	0.5	0.068	0.1852	0.2262	0.3936	0.1134	0.0319	8
BDNF	Training gene	0.0971	0.1515	0.165	0.1875	0.1287	0.1735	0.1687	0	0.0208	0.0588	0	0.1538	0.4194	0.087	0.1449	0.561	0.1688	0.0323	0.2619	0.1111	0.0291	0.0874	0.0874	0.068	0.0874	0.0291	0.0874	0.5437	0.0874	0.0208	0.125	0.125	0.25	0.5545	0.6699	0.5062	0.5	0.068	0.0247	0.5	0.0638	0.1649	0.5638	9
CXCL12	Training gene	0.1068	0.1212	0.1165	0.25	0.1881	0.1837	0.4819	0.3333	0.125	0.0588	0.1111	0.2308	0.2903	0.0435	0.1304	0.2927	0.1169	0.1613	0	0.1389	0.1165	0.0874	0.0874	0.068	0.0874	0.0291	0.0874	0.5437	0.0874	0.125	0.4375	0.1875	0.2656	0.1485	0.6699	0.5062	0.5	0.1553	0.0864	0.7024	0.1702	0.1443	0.0319	10
GRM1	Training gene	0.1165	0.202	0.2233	0.2375	0.099	0.1122	0.1687	0.2	0.1458	0.2451	0.1481	0.0769	0.5806	0.2174	0.2029	0.3902	0.2597	0.0968	0.2143	0.1944	0.0874	0.0874	0.0874	0.5825	0.0874	0.0291	0.0874	0.5437	0.0874	0.0625	0.0313	0.0313	0.0469	0.1584	0.6699	0.5062	0.5	0.068	0.0123	0.2262	0.3511	0.5876	0.5638	11
NPY	Training gene	0.1262	0.1414	0.3981	0.225	0.1683	0.1633	0.1687	0.2667	0.2292	0.1275	0.037	0	0.7742	0	0.1884	0.3415	0.1429	0	0.4762	0.0556	0.0097	0.0874	0.0874	0.068	0.0874	0.0291	0.0874	0.5437	0.0874	0.0833	0.3594	0.0781	0.0938	0.3861	0.6699	0.5062	0.5	0.1845	0.0494	0.4643	0.1809	0.5876	0.5638	12
GAL	Training gene	0.1359	0.1616	0.1942	0.2	0.1188	0.1224	0.1687	0	0.1042	0.1569	0.037	0	0	0.2609	0.2319	0.3171	0.3247	0	0.3095	0.0833	0.0097	0.0874	0.0874	0.5825	0.0874	0.5243	0.0874	0.5437	0.0874	0.3125	0.2656	0.1406	0.2031	0.4554	0.6699	0.5062	0.5	0.165	0.321	0.4643	0.1596	0.5876	0.5638	13
CYP2D6	Training gene	0.1456	0.5657	0.6408	0.2625	0.1782	0.602	0.1687	0.1333	0.2083	0.0588	0.1852	0.1154	1	0.1304	0.3913	0.5854	0.1948	0.0645	0	0.3333	0.1845	0.0874	0.0874	0.5825	0.0874	0.5243	0.6311	0.5437	0.0874	0.2292	0	0	0	0.198	0.6699	0	0.5	0.068	0.1235	0.1905	0	0	0.5638	14
KIF5C	Training gene	0.1553	0.3333	0.6796	0.1375	0.1485	0.1429	0.9157	0	0	0.3333	0	0	0	0	0.2899	0	0.7273	0	0.619	0	0.6117	0.0874	0.0874	0.068	0.0874	0.5243	0.0874	0.5437	0.0874	0	0.0938	0.25	0.0156	0.3663	0.6699	0.5062	0	0.068	0.5679	0.3095	0.117	0.1134	0.0851	15
TNFSF4	Training gene	0.165	0.0909	0.0874	0.175	0.0891	0.051	0.3735	0	0.1875	0.2157	0	0	0	0	0.6957	0.1463	0.2338	0.1935	0.5952	0.8333	0.1845	0.8738	0.0874	0.5825	0.0874	0.5243	0.0874	0.5437	0.0874	0.1042	0.0625	0.1094	0.2813	0.1782	0.6699	0.5062	0.5	0.1456	0.8519	0.9405	0.4787	0.5876	0.5638	16
ITGB2	Candidate gene	0.1748	0.2424	0.1748	0.275	0.604	0.602	0.1687	0.6667	0.625	0.1667	0.2963	0.6538	0.2903	0.6522	0.1594	0.5122	0.1558	0.6129	0.4048	0.1667	0.0777	0.3981	0.233	0.5825	0.5728	0.5243	0.2427	0.5437	0.4854	0.5625	0.9063	0.6875	0.1563	0.1089	0.6699	0.5062	0.5	0.6214	0.037	0.0595	0.4255	0.5876	0.5638	17
IL10RA	Candidate gene	0.1845	0.4444	0.1748	0.1125	0.604	0.602	0.1687	0	0.625	0.1471	0	0	0.4516	0.6522	0.3478	0.1463	0.1818	0.6129	0.4286	0.3056	0.1748	0.3592	0.6893	0.5825	0.3883	0.5243	0.6311	0.5437	0.4272	0.3958	0.8906	0.6563	0.1875	0.099	0.6699	0.5062	0.5	0.6214	0.2346	0.25	0.5213	0.5876	0.5638	18
KIF5C	Training gene	0.1942	0.3333	0.6796	0.1375	0.1485	0.1429	0.9157	0	0	0.3333	0	0	0	0	0.2899	0	0.7273	0	0.619	0	0.6117	0.0874	0.6893	0.5825	0.0874	0.5243	0.0874	0.5437	0.0874	0	0	0	0	0.3663	0.6699	0	0	0.068	0	0	0.117	0.1134	0.0851	19
KIF1A	Candidate gene	0.2039	0.697	0.6796	0.6	0.1485	0.1429	0.4819	0.6667	0.625	0.2843	0	0	0	0	0	0	0.5714	0.6129	0.7619	0.75	0.1553	0.3981	0.1845	0.5825	0.2913	0.5243	0.1845	0.5437	0.3689	0	0.2813	0.9531	0.125	0.4752	0.6699	0.5062	0.5	0.1748	0.1728	0.0238	0.2553	0.5876	0.0851	20
BACE1	Candidate gene	0.2136	0.7879	0.1456	0.55	0.604	0.602	0.1687	0.6667	0.625	0.1765	0	0.1923	0.5484	0.6522	0.2464	0.8049	0.6623	0	0.5	0	0.0971	0.4272	0.2816	0.5825	0.5437	0.5243	0.233	0.5437	0.4563	0	0.5469	0.875	0.2188	0.5347	0.6699	0.5062	0.5	0.6214	0	0.5476	0.3723	0.5876	0.5638	21
PITPNC1	Candidate gene	0.2233	0.4242	0.5243	0.625	0.604	0.602	0	0	0	0.6667	0	0	0	0	0	0	0.4545	0	0	0	0.6117	0.2524	0.6893	0.5825	0.2233	0.5243	0.6311	0.5437	0.2621	0	0.1094	0.8125	0.5938	0.1386	0.2427	0.5062	0.5	0.1942	0.642	0.3452	0.2128	0.5876	0.5638	22
CXCL14	Candidate gene	0.233	0.101	0.0971	0.3625	0.1881	0.1837	0.1687	0	0	0.1863	0	0.6538	0	0	0.2754	0.3659	0.3896	0	0.5714	0	0.0583	0.2524	0.6893	0.5825	0.8738	0.5243	0.6311	0.5437	0.2621	0	0.7813	0.0938	0.625	0.7921	0.6699	0.5062	0.5	0.6214	0.6667	0.4643	0.4149	0.5876	0.5638	23
PPIC	Candidate gene	0.2427	0.4242	0.8641	0	0.604	0.602	0.1687	0.6667	0.625	0.451	0	0	0	0	0	0	0.5714	0	0	0	0.6117	0.2524	0.6893	0.5825	0.3107	0.5243	0.6311	0.5437	0.2816	0.3542	0.5781	0.6719	0.2344	0.7921	0.6699	0.5062	0.5	0.6214	0.3333	0.1667	0.6489	0.5876	0.5638	24
RDX	Candidate gene	0.2524	0.6465	0.6408	0.7125	0.604	0.602	0.9157	0.6667	0.625	0.4706	0.7037	0.6538	0	0	0.6957	0.8049	0.4286	0.6129	0.5476	0.75	0.2039	0.6408	0.2039	0.5825	0.3883	0.5243	0.6311	0.5437	0.4272	0.7083	0.5156	0.3594	0.375	0.7921	0.6699	0.5062	0.5	0.6214	0.4198	0.3452	0.2234	0.1546	0.5638	25
CLTA	Candidate gene	0.2621	0.303	0.6408	0.3	0.604	0.602	0.9157	0	0.625	0.4804	0.2963	0	0.5161	0.6522	0.3333	0.4146	0.9091	0	0	0	0.6117	0.3786	0.2136	0.5825	0.3592	0.5243	0.1845	0.5437	0.4175	0.6667	0.625	0.5469	0.5625	0.7921	0.0777	0.5062	0.5	0.6214	0.5802	0.8452	0.5851	0.5876	0.5638	26
KPNB1	Candidate gene	0.2718	0.4444	0.3592	0.525	0.604	0.602	0	0	0.625	0.2745	0.7037	0.6538	0	0.6522	0.6957	0.8049	0.4675	0	0.9524	0	0.6117	0.7087	0.3495	0.1553	0.7184	0.5243	0.6311	0.5437	0.7379	0.7708	0.4688	0.2813	0.4531	0.2475	0.2427	0.5062	0.5	0.6214	0.8272	0.5357	0.0106	0.5876	0.5638	27
SEPT2	Candidate gene	0.2816	0.2929	0.301	0.5	0.604	0.602	0.9157	0	0.625	0.5784	0	0	0	0.6522	0.6957	0.8049	0.9091	0	0	0	0.6117	0.5922	0.2621	0.1456	0.5922	0.5243	0.6311	0.5437	0.6505	0.5208	0.6406	0.375	0.6563	0.7921	0.0777	0.5062	0.5	0.6214	0.1481	0.1429	0.5106	0.5876	0.5638	28
D2HGDH	Candidate gene	0.2913	0.596	0.5243	0	0.604	0.602	0.4819	0	0.625	0.8627	0.7037	0	0	0	0.6957	0	0	0.6129	0	0.25	0.6117	0.2039	0.2913	0.5825	0.3398	0.5243	0.6311	0.5437	0.2136	0	0	0	0	0.7921	0.6699	0.5062	0.5	0.6214	0.5062	0.7857	0.4468	0.5876	0.5638	29
RPS9	Candidate gene	0.301	0.5152	0.3592	0.575	0.604	0.602	0.6988	0	0	0.4118	0	0.6538	0	0.6522	0.6957	0.8049	0.7922	0	0	0	0.6117	0.7379	0.6893	0.5825	0.6602	0.5243	0.6311	0.5437	0.699	0	0	0	0	0.7921	0.0777	0	0	0.6214	0	0	0.0319	0.5876	0.5638	30
PRMT8	Candidate gene	0.3107	0.6162	0.6408	0.7	0.604	0.602	0.4819	0	0	0.9314	0	0	0	0	0	0	0.5714	0	0.9286	0	0.6117	0.6893	0.6893	0.5825	0.3398	0.5243	0.6311	0.5437	0.7573	0	0.1719	0.4688	0.0625	0.4851	0.6699	0.5062	0.5	0.6214	0.5926	0.4405	0.4574	0.5876	0.0319	31
GNE	Candidate gene	0.3204	0.697	0.5243	0.925	0.604	0.602	0.6988	0	0.625	0.6275	0	0	0.6774	0	0.6957	0	0.5714	0.6129	0.7857	0.25	0.6117	0.4272	0.6893	0.5825	0.3107	0.5243	0.6311	0.5437	0.534	0.6458	0.375	0.6406	0.9531	0.7921	0.6699	0.5062	0.5	0.6214	0.1111	0.6667	0.2766	0.5876	0.5638	32
SRPK1	Candidate gene	0.3301	0.2727	0.2718	0.7625	0.604	0.602	0.9157	0	0.625	0.3824	0	0.6538	0	0	0.6957	0	0.9091	0	0	0	0.6117	0.6117	0.3107	0.165	0.6796	0.5243	0.2427	0.5437	0.5049	0.4792	0.25	0.4063	0.4219	0.7921	0.6699	0.5062	0.5	0.6214	0.5556	0.1071	0.3191	0.5876	0.5638	33
PCK2	Candidate gene	0.3398	0.7677	0.5243	0.4125	0.604	0.602	0.6988	0	0.625	0.2353	0.7037	0.6538	0.871	0.6522	0.2609	0.439	0.9091	0.6129	0	0.6111	0.6117	0.2524	0.6893	0.5825	0.2524	0.5243	0.6311	0.5437	0.2136	0.2083	0.9219	0.8281	0.4844	0.3366	0.6699	0.5062	0.5	0.6214	0.2716	0.2024	0.4894	0.5876	0.5638	34
RPS9	Candidate gene	0.3495	0.5152	0.3592	0.575	0.604	0.602	0	0	0	0.4118	0	0.6538	0	0.6522	0.6957	0.8049	0.7922	0	0	0	0.6117	0.7379	0.6893	0.5825	0.6602	0.5243	0.6311	0.5437	0.699	0	0	0	0	0.7921	0.0777	0	0	0.6214	0	0	0.0319	0.5876	0	35
HDLBP	Candidate gene	0.3592	0.4141	0.2718	0.2875	0.604	0.602	0.4819	0	0.625	0.4314	0	0	0	0	0.6957	0	0.4675	0	0	0	0.6117	0.699	0.3786	0.1359	0.7379	0.5243	0.6311	0.5437	0.767	0.5833	0.875	0.5781	0.2969	0.2277	0.2427	0.5062	0.5	0.6214	0.9506	0.6667	0.0532	0.5876	0.117	36
HECW1	Candidate gene	0.3689	0.8384	0.8641	0.8625	0.604	0.602	0.4819	0	0.625	0.8333	0	0	0	0	0	0	0.3377	0	0	0	0.6117	0.6505	0.6893	0.5825	0.5825	0.5243	0.6311	0.5437	0.6602	0.4375	0.0469	0.4844	0.1094	0.5347	0.6699	0.5062	0	0.6214	0.7037	0.1071	0.3723	0.5876	0.5638	37
TPD52L1	Candidate gene	0.3786	0.3636	0.5243	0.6375	0.604	0.602	0.9157	0	0	0.2647	0.7037	0	0	0	0.6957	0	0.7662	0	0	0	0.6117	0.5243	0.3204	0.5825	0.8738	0.5243	0.6311	0.5437	0.6699	0.6875	0.6563	0.7656	0.3281	0.5743	0.0777	0.5062	0.5	0.6214	0.3457	0.2857	0.4043	0.5876	0.5638	38
TSPAN9	Candidate gene	0.3883	0.8081	0.3107	0.3375	0.604	0.602	0.1687	0	0	0.8235	0	0	0	0	0	0	0.4156	0	0	0	0.6117	0.1748	0.6893	0.5825	0.1942	0.5243	0.6311	0.5437	0.1845	0.8333	0.4219	0.9219	0.5781	0.2574	0.6699	0.5062	0.5	0.6214	0.6296	0.1667	0.6277	0.5876	0.5638	39
PCSK7	Candidate gene	0.3981	0.8283	0.2913	0.8	0.604	0.602	0.1687	0	0.625	0.5882	0	0	0	0	0	0	0.9091	0	0	0	0.165	0.2039	0.2427	0.5825	0.3883	0.5243	0.2039	0.5437	0.3398	0.6042	0.7969	0.9063	0.4375	0.7921	0.6699	0.5062	0.5	0.6214	0.0617	0.0595	0.266	0.5876	0.5638	40
STX12	Candidate gene	0.4078	0.3535	0.4175	0.875	0.604	0.602	0.3735	0	0	0.7451	0.3704	0	0	0	0.6957	0	0	0	0	0	0.6117	0.3883	0.1942	0.5825	0.6214	0.5243	0.2136	0.5437	0.3981	0.3333	0.3906	0.3125	0.6719	0.7921	0.2427	0.5062	0	0.6214	0.9259	0.7143	0.2021	0.5876	0.5638	41
FARP2	Candidate gene	0.4175	0.2121	0.5243	0.65	0.604	0.602	0.6988	0	0.625	0.7843	0.7037	0.6538	0	0.6522	0.6957	0.8049	0.6883	0	0.8095	0	0.6117	0.3301	0.1748	0.5825	0.3107	0.5243	0.1748	0.5437	0.2816	0.7917	0.4844	0.8438	0.5469	0.505	0.6699	0.5062	0.5	0.6214	0.7531	0.3929	0.9468	0.5876	0.5638	42
HSD17B11	Candidate gene	0.4272	0.5859	0.8641	0.775	0.604	0.602	0.4819	0.6667	0.625	0.3137	0	0	0	0	0.6957	0	0	0	0	0	0.6117	0.4175	0.6893	0.5825	0.3107	0.5243	0.6311	0.5437	0.3689	0	1	0.7188	0.4688	0.1683	0.2427	0.5062	0.5	0.6214	0	0.0595	0.5745	0.5876	0.5638	43
INIP	Candidate gene	0.4369	0.5455	0.5243	0.95	0	0	0	0	0	0.598	0	0	0	0	0	0	0	0	0	0	0.6117	0.301	0.6893	0.5825	0.1942	0.5243	0.6311	0.5437	0.3107	0	0	0	0	0	0.2427	0.5062	0	0.6214	0.5432	0.5833	0	0	0.5638	44
SLC22A17	Candidate gene	0.4466	0.4646	0.2233	0.7875	0.604	0.602	0.3373	0	0	0.6961	0	0	0	0	0	0	0	0	0	0	0.6117	0.2039	0.6893	0.5825	0.2233	0.5243	0.6311	0.5437	0.2136	0	0.1875	0.8906	0.0781	0.4851	0.6699	0.5062	0.5	0.6214	0.7654	0.881	0.3298	0.5876	0.5638	45
TAGLN	Candidate gene	0.4563	0.3232	0.8641	0.45	0.604	0.602	0	0	0.625	0.1373	0	0	0.6774	0.6522	0.6957	0	0.5714	0	0.5238	0	0.1262	0.6699	0.6893	0.5825	0.5534	0.5243	0.6311	0.5437	0.7184	0.1667	0.8438	0.9844	0.3438	0.7921	0.6699	0.5062	0.5	0.6214	0.5185	0.5595	0.1489	0.5876	0.5638	46
PRTFDC1	Candidate gene	0.466	0.7677	0.5243	0.9	0.604	0.602	0	0	0.625	0.8922	0	0	0	0	0	0	0	0	0	0	0.6117	0.4466	0.6893	0.5825	0.4175	0.5243	0.6311	0.5437	0.5049	0	0	0	0	0.297	0.6699	0.5062	0.5	0.6214	0.4815	0.5833	0.2872	0.5876	0.5638	47
TBC1D23	Candidate gene	0.4757	0.6364	0.5243	0	0.604	0.602	0	0	0	0.7941	0	0	0	0	0	0	0	0	0.881	0	0.6117	0.301	0.6893	0.5825	0.3883	0.5243	0.6311	0.5437	0.3107	0	0	0	0	0.7921	0.6699	0.5062	0.5	0.6214	0.284	0.6667	0.4362	0.5876	0.5638	48
KIAA0368	Candidate gene	0.4854	0.8384	0.8641	0.6125	0.604	0.602	0.6988	0	0	0.7549	0	0	0	0	0	0	0.7922	0	0	0	0.6117	0.7184	0.3592	0.5825	0.4369	0.5243	0.6311	0.5437	0.3495	0.2708	0.1406	0.3281	0.8125	0.7921	0.6699	0.5062	0.5	0.6214	0.4938	0.3929	0.3511	0.5876	0.5638	49
NDUFA10	Candidate gene	0.4951	0.6061	0.8641	0.3875	0.604	0.602	0.4819	0.6667	0.625	0.4608	0.7037	0.6538	0.3871	0	0.3188	0.8049	0.9091	0.6129	0	0.25	0.6117	0.6214	0.2913	0.5825	0.2718	0.5243	0.6311	0.5437	0.6699	0	0.3281	0.3438	0.7656	0.7921	0.6699	0.5062	0.5	0.2136	0.4074	0.25	0.9681	0.5876	0.5638	50
PITX1	Candidate gene	0.5049	0.2525	0.8641	0.5125	0.604	0.602	0	0	0.625	0.6078	0	0	0	0	0	0	0.2727	0.6129	0.4524	0.9167	0.6117	0.8738	0.6893	0.5825	0.5534	0.5243	0.6311	0.5437	0.8835	0.4167	0.9375	0.9375	0.6094	0.1287	0.2427	0.5062	0.5	0.2427	0.0741	0.1071	0.1383	0.5876	0.0319	51
POU2AF1	Candidate gene	0.5146	0.5556	0.3592	0.3125	0.604	0.602	0.6988	0	0	0.2549	0	0	0	0	0	0	0.4416	0	0.6667	0	0.6117	0.8738	0.6893	0.5825	0.6893	0.5243	0.6311	0.5437	0.8835	0.2917	0.8281	0.1719	0.3594	0.0891	0.6699	0.5062	0	0.6214	0.2593	0.9048	0.617	0.5876	0.5638	52
PPP1R13B	Candidate gene	0.5243	0.5354	0.8641	0.6625	0.604	0.602	0.6988	0	0.625	0.6471	0	0	0	0	0.6957	0.8049	0.9091	0	0.8333	0	0.6117	0.6019	0.6893	0.5825	0.3883	0.5243	0.6311	0.5437	0.534	0.75	0.0781	0.8594	0.4063	0.4653	0.6699	0.5062	0.5	0.6214	0.6049	0.1071	0.6064	0.5876	0.5638	53
DDX11	Candidate gene	0.534	0.3131	0.5243	0.8375	0.604	0.602	0.9157	0	0	0.6373	0.7037	0	0	0	0	0	0	0.6129	0.381	0.6667	0.6117	0.4466	0.6893	0.5825	0.7087	0.5243	0.6311	0.5437	0.5049	0	0.5313	0.75	0.7813	0.1188	0.6699	0.5062	0.5	0.6214	0.8765	0.3929	0.5638	0.5876	0.5638	54
DTYMK	Candidate gene	0.5437	0.3838	0.8641	0.9625	0.604	0.602	0.6988	0.6667	0.625	0.3235	0.7037	0	0.6774	0.6522	0.6957	0.8049	0	0	0	0.9167	0.6117	0.3301	0.6893	0.5825	0.6311	0.5243	0.6311	0.5437	0.3689	0.5	0.8125	0.5625	0.5313	0.396	0.2427	0.5062	0.5	0.6214	0.4444	0.5833	0	0.5876	0.5638	55
FGF20	Candidate gene	0.5534	0.1313	0.7184	0.325	0.604	0.602	0	0	0.625	0.7353	0.4074	0.6538	0.4516	0	0.2174	0.8049	0.9091	0	0.8571	0	0.2233	0.8738	0.6893	0.5825	0.1942	0.5243	0.6311	0.5437	0.2136	0	0.7656	0.2344	0.8594	0.3465	0.6699	0.5062	0.5	0.6214	0.3951	0.2857	0.0957	0.5876	0.5638	56
TBCK	Candidate gene	0.5631	0.7172	0.5243	0.475	0.604	0.602	0.5783	0	0	0.8431	0	0	0	0	0	0	0.6883	0	0	0	0.6117	0.301	0.6893	0.5825	0.8738	0.5243	0.6311	0.5437	0.3107	0	0	0	0	0.7921	0.6699	0.5062	0.5	0.6214	0.716	0.6667	0	0.5876	0.5638	57
GPR35	Candidate gene	0.5728	0.4646	0.2233	0.8875	0.604	0.602	0.1687	0	0.625	0.6863	0	0.6538	0	0	0.3768	0.4878	0.3506	0	0	0	0.6117	0.8738	0.6893	0.5825	0.8738	0.5243	0.6311	0.5437	0.8835	0.9167	0.2031	0.4531	0.7344	0.3168	0.6699	0.5062	0.5	0.6214	0.679	0.0595	0.8723	0.5876	0.0319	58
RPS9	Candidate gene	0.5825	0.5152	0.3592	0.575	0.604	0.602	0.6988	0	0.625	0.4118	0.7037	0.6538	0	0.6522	0.6957	0.8049	0.7922	0	0	0	0.6117	0.7379	0.2136	0.5825	0.6602	0.5243	0.6311	0.5437	0.699	0.1875	0.8594	0.7344	0.3125	0.7921	0.0777	0.5062	0.5	0.6214	0.8642	0.9762	0.0319	0.5876	0.5638	59
IFT88	Candidate gene	0.5922	0.1818	0.5243	0.5375	0.604	0.602	0.9157	0	0	0.3529	0	0.6538	0.871	0.6522	0.6957	0.8049	0.7143	0	0.2381	0	0.6117	0.466	0.6893	0.5825	0.6117	0.5243	0.6311	0.5437	0.5922	0.8542	0.6094	0.7969	0.8906	0.7921	0.6699	0.5062	0.5	0.6214	0.3827	0.3929	0.2979	0.5876	0.5638	60
NRIP1	Candidate gene	0.6019	0.1717	0.8641	0.375	0.604	0	0	0.6667	0.0625	0.2941	0	0.6538	0.871	0.6522	0.6957	0.8049	0.3636	0	0.9048	0	0.6117	0.4757	0.2524	0.5825	0.4466	0.5243	0.2233	0.5437	0.4466	0.875	0.3438	0.2188	0.9219	0.4257	0.6699	0.5062	0.5	0.6214	0	0.869	0.0851	0.5876	0.5638	61
STK25	Candidate gene	0.6117	0.2323	0.8641	0.825	0.604	0.602	0.9157	0	0.625	0.3039	0	0	0	0	0	0	0	0	0	0	0.6117	0.5825	0.2718	0.5825	0.6019	0.5243	0.6311	0.5437	0.5049	0.25	0.6719	0.7813	0.9063	0.7921	0.6699	0.5062	0.5	0.6214	0.3704	0.3452	0.5319	0.5876	0.5638	62
ZC3H12C	Candidate gene	0.6214	0.9394	0.8641	0.4	0.604	0.602	0	0	0	0.6765	0	0	0	0	0	0	0.5714	0	0	0	0.6117	0.8738	0.6893	0.5825	0.8738	0.5243	0.6311	0.5437	0.8835	0	0	0	0	0.2772	0.6699	0.5062	0.5	0.6214	0.4321	0.0119	0.5532	0.5876	0.5638	63
DCAF11	Candidate gene	0.6311	0.7677	0.5243	0.9125	0.604	0.602	0.9157	0	0.625	0.3725	0	0	0	0	0	0	0	0	0	0	0.6117	0.6796	0.6893	0.5825	0.4175	0.5243	0.6311	0.5437	0.7476	0.375	0.4531	0.6094	0.8281	0.3069	0.0777	0.5062	0.5	0.6214	0.7901	0.7143	0	0.5876	0.5638	64
ARHGAP20	Candidate gene	0.6408	0.404	0.5243	0.6875	0.604	0.602	0.6988	0	0	0.8725	0.2963	0	0	0	0.6957	0.8049	0.3117	0	0	0	0.6117	0.8738	0.6893	0.5825	0.8738	0.5243	0.6311	0.5437	0.8835	0	0	0	0	0.7921	0.6699	0.5062	0.5	0.6214	0.8025	0.3929	0.4681	0.5876	0.5638	65
MFSD8	Candidate gene	0.6505	0.6667	0.3107	0	0.604	0.602	0.3735	0	0	0.7059	0	0	0	0	0.6957	0	0	0.6129	0	0.6944	0.6117	0.8738	0.6893	0.5825	0.8738	0.5243	0.6311	0.5437	0.8835	0	0	0	0	0.2178	0.6699	0.5062	0.5	0.2039	0.3086	0.75	0.9043	0.5876	0.5638	66
TSEN34	Candidate gene	0.6602	0.9394	0.8641	0	0.604	0.602	0.6988	0	0	0.5294	0	0	0	0	0.6957	0	0	0.6129	0	0.4722	0.6117	0.5243	0.6893	0.5825	0.4951	0.5243	0.6311	0.5437	0.5922	0	0.7344	0.5156	0.3906	0.7921	0.2427	0.5062	0.5	0.6214	0.6173	0.9286	0.8085	0.5876	0.5638	67
ANO7	Candidate gene	0.6699	0.6667	0.2233	0.8125	0.604	0.602	0.1687	0	0	0.902	0.7037	0	0	0	0.6957	0	0	0	0	0	0.6117	0.8738	0.6893	0.5825	0.8738	0.5243	0.6311	0.5437	0.8835	0	0	0	0	0.5644	0.6699	0.5062	0.5	0.6214	0.4691	0.631	0	0.5876	0.5638	68
THAP4	Candidate gene	0.6796	0.8687	0.5243	0	0.604	0.602	0.6988	0	0.625	0.7157	0	0	0	0	0	0	0.9091	0	0	0	0.6117	0.301	0.6893	0.5825	0.8738	0.5243	0.6311	0.5437	0.3689	0	0.1563	0.5938	0.7969	0.7921	0.6699	0.5062	0.5	0.6214	0.8395	0.7976	0.234	0.5876	0.5638	69
TSEN34	Candidate gene	0.6893	0.9394	0.8641	0	0.604	0.602	0.6988	0	0	0.5294	0	0	0	0	0.6957	0	0	0.6129	0	0.4722	0.6117	0.5243	0.6893	0.5825	0.4951	0.5243	0.6311	0.5437	0.5922	0	0	0	0	0.7921	0.2427	0	0	0.6214	0	0	0.8085	0.5876	0.5638	70
PPP1R7	Candidate gene	0.7476	0.7374	0.5243	0.9875	0.604	0.602	0	0	0	0.6569	0	0.2308	0	0	0.6957	0	0.5714	0	0	0	0.6117	0.6602	0.3398	0.5825	0.7282	0.5243	0.6311	0.5437	0.7184	0.4583	0.7031	0.2656	0.9688	0.7921	0.6699	0.5062	0.5	0.6214	0.4568	0.2024	0.9255	0.5876	0.5638	76
ABCA13	Candidate gene	0.7573	0.8586	0.4078	0	0.604	0.602	0.1687	0	0	0.8529	0	0	0	0	0.6957	0	0.6753	0	0	0	0.1359	0.8738	0.6893	0.5825	0.8738	0.5243	0.6311	0.5437	0.8835	0	0	0	0	0.7921	0.6699	0.5062	0	0.233	0.6543	0.3095	0.8085	0.5876	0.5638	77
NME8	Candidate gene	0.767	0.4848	0.8641	0.4625	0.604	0.602	0	0	0	0.8137	0	0	0	0	0	0	0.7532	0.6129	0	0.9167	0.6117	0.2039	0.6893	0.5825	0.8738	0.5243	0.6311	0.5437	0.2136	0	0.75	0.2969	0.5156	0.5149	0.6699	0.5062	0.5	0.6214	0.5309	0.9167	0	0	0.5638	78
KIAA1958	Candidate gene	0.7767	0	0.5243	0	0.604	0.602	0	0	0	0.7745	0	0	0	0	0	0	0.5714	0	0	0	0.6117	0.8738	0.6893	0.5825	0.8738	0.5243	0.6311	0.5437	0.8835	0	0	0	0	0.7921	0.6699	0.5062	0.5	0.6214	0.6914	0.75	0.4894	0.5876	0.5638	79
SVEP1	Candidate gene	0.7864	0.5758	0.3301	0.425	0.604	0.602	0.4819	0	0	0.4412	0	0	0	0	0	0	0.3766	0	0	0	0.6117	0.8738	0.6893	0.5825	0.8738	0.5243	0.6311	0.5437	0.8835	1	0.9844	0.3906	0.6875	0.4059	0.6699	0.5062	0.5	0.6214	0.2099	0.5119	0.1064	0.5876	0.5638	80
MCPH1	Candidate gene	0.7961	0.6869	0.5243	0.4875	0.604	0.602	0.9157	0	0.625	0.7255	0	0	0	0	0	0	0.2208	0.6129	0.3333	0.6944	0.6117	0.8738	0.3689	0.5825	0.8738	0.5243	0.6311	0.5437	0.8835	0	0.3125	0.625	0.8438	0.7921	0.6699	0.5062	0.5	0.6214	0.1975	0.9524	0.9255	0.0515	0.0319	81
RNF214	Candidate gene	0.8252	0.8687	0.8641	0	0.604	0	0.6988	0	0	0.9902	0	0	0	0	0	0	0.5714	0	0	0	0.6117	0.301	0.6893	0.5825	0.1942	0.5243	0.6311	0.5437	0.3107	0	0	0	0	0.2673	0.6699	0.5062	0.5	0.6214	0.1358	0.881	0.5957	0.5876	0.5638	84
FDX1	Candidate gene	0.835	0.8889	0.8641	0.4375	0.604	0.602	0.4819	0.6667	0.625	0.1961	0.7037	0	0.6774	0	0.6957	0	0.5714	0	0	0.9167	0.6117	0.8738	0.6893	0.5825	0.8738	0.5243	0.6311	0.5437	0.8835	0.5417	0.9531	0.4375	0.7188	0.7921	0.6699	0.5062	0.5	0.6214	0.1605	0.619	0.5426	0.5876	0.5638	85
SIDT2	Candidate gene	0.8447	0.6566	0.1456	0.1625	0.604	0.602	0.1687	0	0	0.6176	0	0	0	0	0	0	0.9091	0	0	0	0.6117	0.8738	0.6893	0.5825	0.8738	0.5243	0.6311	0.5437	0.8835	0	0.7188	0.7031	0.7031	0.2079	0.6699	0.5062	0.5	0.6214	0.9753	0.5833	0.2447	0.5876	0.5638	86
IL9	Candidate gene	0.8544	0.1111	0.1068	0.125	0.604	0.602	0.4819	0	0.625	0.2059	0	0.6538	0.3548	0	0.3478	0.1463	0.1299	0	0.7143	0.6389	0.1456	0.8738	0.6893	0.5825	0.8738	0.5243	0.6311	0.5437	0.8835	0.8125	0.5	0.1563	0.9375	0.7921	0.6699	0.5062	0.5	0.6214	0.9877	0.4643	1	0.5876	0.5638	87
RAB31	Candidate gene	0.8641	0.4949	0.7087	0.725	0.604	0.602	0	0	0.625	0.3627	0	0	0.871	0	0	0	0.5714	0	0	0	0.6117	0.3592	0.6893	0.5825	0.2524	0.5243	0.6311	0.5437	0.4757	0.625	0.5625	0.5313	0.9844	0.2772	0.6699	0.5062	0.5	0.6214	0.8889	0.9881	0.9894	0.5876	0.5638	88
NRL	Candidate gene	0.8738	0.2222	0.8641	0.7375	0.604	0.602	0.9157	0	0	0.7647	0	0	0	0	0.6957	0	0.9091	0.6129	0.6905	0.9167	0.6117	0.8738	0.6893	0.5825	0.8738	0.5243	0.6311	0.5437	0.8835	0.9375	0.4063	0.2031	0.5	0.7921	0.6699	0.5062	0	0.6214	0.0988	0.631	0.0745	0.5876	0.5638	89
CEP164	Candidate gene	0.8835	0.3737	0.5243	0.85	0.604	0.602	0.9157	0	0.625	0.9118	0.7037	0	0	0.6522	0.6957	0.8049	0.5714	0.6129	0	0	0.6117	0.3495	0.6893	0.5825	0.6311	0.5243	0.6311	0.5437	0.4078	0.7292	0.2344	1	0.875	0.7921	0.2427	0.5062	0.5	0.6214	0.7407	0.7976	0.3085	0.5876	0.5638	90
LYPLAL1	Candidate gene	0.8932	1	0.2718	0	0.604	0.602	0.4819	0	0	0.3922	0	0	0	0	0	0	0.9091	0	0	0	0.6117	0.6214	0.6893	0.5825	0.2718	0.5243	0.6311	0.5437	0.466	0	0	0	0	0.7921	0.6699	0.5062	0	0.6214	0.8148	0.2857	0.883	0.5876	0.5638	91
IGFBP1	Candidate gene	0.9029	0.1919	0.3592	0.35	0.604	0.602	0.4819	0	0.0625	0.1176	0.7037	0.6538	0.871	0.6522	0.6957	0.5366	0.2468	0	0.7381	0.8056	0.068	0.8738	0.6893	0.5825	0.8738	0.5243	0.6311	0.5437	0.8835	0.9792	0.9688	0.4219	1	0.2376	0.6699	0.5062	0.5	0.2233	0.358	0.1667	0.1809	0.5876	0.5638	92
ARMC12	Candidate gene	0.9126	0	0.5243	0	0.604	0.602	0	0	0	0.8039	0	0	0	0	0	0	0.9091	0	0	0	0.6117	0.8738	0.6893	0.5825	0.8738	0.5243	0.6311	0.5437	0.8835	0	0	0	0	0.4257	0.6699	0.5062	0.5	0.6214	0.7284	0.75	0	0	0.5638	93
MEFV	Candidate gene	0.9223	0.2828	0.699	0.675	0.604	0.602	0.9157	0	0.625	0.9804	0.7037	0.6538	0.871	0	0.6957	0.8049	0.2078	0.6129	0.3571	0.9167	0.6117	0.8738	0.3204	0.5825	0.699	0.5243	0.6311	0.5437	0.8835	0	0	0	0	0.3465	0.6699	0.5062	0.5	0.6214	0.2222	0.8214	0.9149	0.5876	0.5638	94
NRIP2	Candidate gene	0.932	0.7273	0.8641	0.75	0.604	0.602	0.4819	0	0	0.9608	0	0	0	0	0	0	0.4026	0	0	0	0.6117	0.8738	0.6893	0.5825	0.8738	0.5243	0.6311	0.5437	0.8835	0	0.5938	0.0469	0.1719	0.4257	0.6699	0.5062	0.5	0.6214	0.9383	0.75	0.9574	0.5876	0.5638	95
C11orf53	Candidate gene	0.9417	0	0.8641	0	0	0	0.6988	0	0	0	0	0	0	0	0	0	0.9091	0	0	0	0.6117	0.2039	0.6893	0.5825	0.8738	0.5243	0.6311	0.5437	0.2136	0	0	0	0	0.3267	0.6699	0	0.5	0.6214	0.963	0.8571	0.3404	0.5876	0.5638	96
GAL3ST2	Candidate gene	0.9515	0.8081	0.1359	0.975	0.604	0.602	0.1687	0	0.625	0.8824	0	0.3077	0	0	0.6957	0	0	0	0	0	0.6117	0.8738	0.6893	0.5825	0.8738	0.5243	0.6311	0.5437	0.8835	0	0	0	0	0.1881	0.6699	0.5062	0.5	0.6214	0.9136	0.0595	0.9681	0	0.5638	97
SLC26A8	Candidate gene	0.9612	0.3939	0.2233	0	0.604	0.602	0.3373	0	0	0.951	0	0	0	0	0.6957	0	0.2857	0	1	0	0.6117	0.8738	0.6893	0.5825	0.8738	0.5243	0.6311	0.5437	0.8835	0	0	0	0	0.7921	0.6699	0.5062	0.5	0.6214	0.2469	0.8214	0.6383	0.5876	0.5638	98
ZNF200	Candidate gene	0.9709	0.7475	0.5243	1	0.604	0.602	0	0	0	0.9216	0.7037	0	0	0	0	0	0	0	0	0	0.6117	0.233	0.6893	0.5825	0.2524	0.5243	0.6311	0.5437	0.2524	0.9583	0.2969	0.5	0.75	0.5347	0.0777	0.5062	0	0.6214	1	0.9881	0.7553	0.5876	0.5638	99
ITFG2	Candidate gene	0.9806	0	0.8641	0	0.604	0.602	0.4819	0	0	0.9412	0	0	0	0	0	0	0	0	0	0	0.6117	0.8738	0.6893	0.5825	0.8738	0.5243	0.6311	0.5437	0.8835	0.8958	0.2188	0.9688	0.6406	0.7921	0.6699	0.5062	0.5	0.6214	0.7778	0.3929	0.7447	0.1134	0.5638	100
TMPRSS13	Candidate gene	0.9903	0.8081	0.1262	0.9375	0.604	0.602	0.1687	0	0	0.9706	0	0	0	0	0.6957	0	0.5714	0	0.9762	0	0.6117	0.8738	0.6893	0.5825	0.8738	0.5243	0.6311	0.5437	0.8835	0	0	0	0	0.7921	0.6699	0.5062	0	0.6214	0.2963	0.5119	0.8936	0.5876	0.5638	101
MEIOB	Candidate gene	1	0.6263	0.8641	0	0.604	0	0	0	0	1	0	0	0	0	0	0	0	0	0	0	0.2136	0.8738	0.6893	0.5825	0.8738	0.5243	0.6311	0.5437	0.8835	0	0	0	0	0	0.6699	0	0.5	0.6214	0.9012	0.9524	0	0	0.5638	102

## Sheet: WesternPleasure_CNS
Gene name	Group	P-value	Annotation â€“ Gene Ontology	Annotation â€“ UniProt	Text-mining	Annotation â€“ InterPro	Annotation â€“ Pfam	Annotation â€“ SIMAP (localization)	Annotation â€“ DrugBank	Annotation â€“ Stitch	Annotation â€“ RGD ChEBI	Annotation â€“ Reactome	Annotation â€“ WikiPathways	Annotation â€“ RGD pathways	Annotation â€“ BioCarta	Annotation â€“ CPDB	Annotation â€“ hiPathDB	Annotation â€“ GAD	Annotation â€“ OMIM	Annotation â€“ RGD MP	Annotation â€“ RGD RDO	Interaction â€“ String	Interaction â€“ BioGrid	Interaction â€“ I2D	Interaction â€“ IntAct	Interaction â€“ iRefIndex	Interaction â€“ Mint	Interaction â€“ HPRD	Interaction â€“ MIPS	Interaction â€“ GeneRIF	Expression â€“ Su et al (2002)	Expression â€“ Su et al (2004)	Expression â€“ CMAP	Expression â€“ Lukk et al	Annotation â€“ PaGenBase	Annotation â€“ CGAP	Annotation â€“ GNF	Annotation â€“ eGenetics	Blast	Precalculated â€“ Ouzounis	Precalculated â€“ Prospectr	Precalculated â€“ HaploPred	Annotation â€“ Aura	Annotation â€“ mirZ	id
LTB	Training gene	0.0093	0.0374	0.0374	0.0533	0.0388	0.05	0.1842	0	0	0.0561	0	0	0.129	0	0.0714	0.1282	0.0541	0	0.0833	0	0.0748	0.0841	0.0841	0.0654	0.0841	0.5234	0.0841	0.0467	0.0841	0.1905	0.7903	0.0484	0.1452	0.0374	0.0566	0	0	0.0748	0	0	0.7745	0.049	0.0787	0
GRIN1	Training gene	0.0374	0.1776	0.243	0.2	0.1068	0.1	0.1842	0.0833	0.0476	0.1495	0.1944	0.0625	0.5161	0.1667	0.1964	0.4872	0.2703	0.1905	0.25	0.037	0.1215	0.0841	0.0841	0.0654	0.0841	0.028	0.0841	0.0467	0.0841	0.0476	0.0323	0.0161	0.0323	0.514	0.6038	0.5	0.5068	0.0748	0.1507	0.2738	0.3333	0.1078	0.0337	3
BDNF	Training gene	0.0935	0.1308	0.1308	0.16	0.1262	0.2	0.1842	0	0.0238	0.0561	0	0.3125	0.3548	0.0833	0.1786	0.6154	0.1486	0.0476	0.2292	0.1852	0.0654	0.0841	0.0841	0.0654	0.0841	0.028	0.0841	0.5421	0.0841	0.0238	0.1935	0.129	0.2419	0.6262	0.6038	0.5	0.5068	0.0748	0.0411	0.5357	0.0196	0.1373	0.5618	9
GRM1	Training gene	0.1028	0.1682	0.243	0.24	0.0971	0.11	0.1842	0.25	0.1429	0.1682	0.1111	0.125	0.4839	0.25	0.2321	0.4615	0.2568	0.1429	0.2083	0.3333	0.1121	0.0841	0.0841	0.6075	0.0841	0.028	0.0841	0.5421	0.0841	0.0714	0.0806	0.0323	0.0645	0.1589	0.6038	0.5	0.5068	0.0748	0.0137	0.2738	0.3235	0.5784	0.5618	10
CXCL12	Training gene	0.1121	0.0935	0.0935	0.2667	0.2136	0.21	0.5263	0.6667	0.0952	0.0561	0.0833	0.4375	0.2903	0.0417	0.1607	0.2821	0.1216	0.2381	0	0.2222	0.1402	0.0841	0.0841	0.0654	0.0841	0.028	0.0841	0.5421	0.0841	0.1667	0.4839	0.1935	0.2581	0.1402	0.6038	0.5	0.5068	0.1682	0.0959	0.7024	0.1275	0.1275	0.0337	11
NPY	Training gene	0.1215	0.1121	0.4299	0.2133	0.1942	0.19	0.1842	0.5833	0.2619	0.1215	0.0278	0	0.6774	0	0.2143	0.3333	0.1351	0	0.4167	0.0741	0.0093	0.0841	0.0841	0.0654	0.0841	0.028	0.0841	0.5421	0.0841	0.119	0.3387	0.0806	0.129	0.4579	0.6038	0.5	0.5068	0.2056	0.0548	0.5119	0.1471	0.5784	0.5618	12
GAL	Training gene	0.1308	0.1402	0.1776	0.1733	0.1165	0.12	0.1842	0	0.0714	0.1308	0.0278	0	0	0.2917	0.2679	0.3077	0.2838	0	0.2917	0.1111	0.0093	0.0841	0.0841	0.6075	0.0841	0.5234	0.0841	0.5421	0.0841	0.2619	0.2581	0.1452	0.2097	0.5234	0.6038	0.5	0.5068	0.1776	0.3425	0.5119	0.1078	0.5784	0.5618	13
KIF5C	Training gene	0.1402	0.3178	0.8131	0.12	0.1456	0.17	0.8947	0	0	0.2243	0	0	0	0	0.3571	0	0.7432	0	0.5	0	0.5981	0.0841	0.0841	0.0654	0.0841	0.5234	0.0841	0.5421	0.0841	0	0.1613	0.3226	0.0161	0.4393	0.6038	0.5	0	0.0748	0.6301	0.3452	0.049	0.1078	0.0787	14
CYP2D6	Training gene	0.1495	0.5888	0.757	0.2933	0.2039	0.61	0.1842	0.1667	0.2381	0.0561	0.1667	0.1875	1	0.125	0.4286	0.641	0.1622	0.0952	0	0.4444	0.1776	0.0841	0.0841	0.6075	0.0841	0.5234	0.6729	0.5421	0.0841	0.2381	0	0	0	0.2991	0.6038	0	0.5068	0.0748	0.1096	0.1905	0	0	0.5618	15
TNFSF4	Training gene	0.1589	0.0841	0.0841	0.1467	0.0874	0.05	0.4079	0	0.2143	0.1402	0	0	0	0	0.7143	0.1282	0.2162	0.2857	0.4792	0.8148	0.1776	0.8037	0.0841	0.6075	0.0841	0.5234	0.0841	0.5421	0.0841	0.1429	0.1452	0.1129	0.2742	0.2897	0.6038	0.5	0.5068	0.1589	0.8493	0.8571	0.4118	0.5784	0.5618	16
GRM7	Candidate gene	0.1682	0.2991	0.243	0.2533	0.165	0.13	0.1842	0.4167	0.1905	0.5794	0.1111	0.25	0.9355	0	0.25	0.5641	0.4595	0	0.5833	0	0.028	0.2243	0.215	0.6075	0.2804	0.5234	0.3084	0.5421	0.3178	0.8571	0.0484	0.4677	0.0968	0.6075	0.6038	0.5	0.5068	0.0748	0	0.5714	0.0882	0.5784	0.5618	17
GRIK2	Candidate gene	0.1776	0.1963	0.243	0.3333	0.1748	0.14	0.1842	0.4167	0.119	0.1776	0.3056	0	0.9355	0	0.3036	0.5128	0.3243	0.6667	0.6458	0.2963	0.0935	0.8037	0.2243	0.6075	0.3364	0.5234	0.271	0.5421	0.4019	0.2857	0.1129	0.2097	0.1129	0.2804	0.6038	0.5	0.5068	0.1869	0.5068	0.5714	0.2059	0.5784	0.5618	18
SORL1	Candidate gene	0.1869	0.3364	0.1121	0.4133	0.6117	0.61	0.1842	0	0.6429	0.271	0	0	0	0	0	0	0.5	0.6667	0.5625	0.2593	0.1682	0.3738	0.757	0.6075	0.785	0.5234	0.6729	0.5421	0.4206	0.3095	0.5	0.5645	0.2903	0.0841	0.6038	0.5	0.5068	0.6262	0.1781	0.0119	0.0294	0.5784	0.5618	19
KIF5C	Training gene	0.1963	0.3178	0.8131	0.12	0.1456	0.17	0.8947	0	0	0.2243	0	0	0	0	0.3571	0	0.7432	0	0.5	0	0.5981	0.0841	0.757	0.6075	0.0841	0.5234	0.0841	0.5421	0.0841	0	0	0	0	0.4393	0.6038	0	0	0.0748	0	0	0.049	0.1078	0.0787	20
FAS	Candidate gene	0.2056	0.1215	0.1028	0.1867	0.6117	0.61	0.5263	0	0.6429	0.0561	0.6667	0.375	0.3226	0.6667	0.2857	0.1282	0.2297	0.6667	0.1875	0.1481	0.5981	0.4579	0.3738	0.1589	0.3645	0.5234	0.3364	0.5421	0.3925	0.9048	0.4516	0.7419	0.4677	0.1028	0.6038	0.5	0.5068	0.6262	0.0822	0.6429	0.8235	0.049	0.5618	21
NTM	Candidate gene	0.215	0.3738	0.1402	0.2267	0.6117	0.61	0.1842	0	0.6429	0.4393	0	0	0	0	0	0	0.3108	0	0	0	0.5981	0.3551	0.2336	0.6075	0.785	0.5234	0.6729	0.5421	0.3738	0	0.2419	0.371	0.1613	0.6168	0.6038	0.5	0	0.6262	0.1233	0.1905	0	0.5784	0.5618	22
PIP4K2A	Candidate gene	0.2243	0.1869	0.4206	0.3067	0.6117	0.61	0	0	0.6429	0.215	0.6667	0.75	0.5806	0.6667	0.3214	0.8205	0.5135	0	0	0	0.5981	0.3178	0.2991	0.1402	0.3084	0.5234	0.6729	0.5421	0.5701	0.6429	0.7258	0.6613	0.371	0.0935	0.1604	0.5	0.5068	0.6262	0.7123	0.3571	0.7157	0.5784	0.5618	23
PARD3	Candidate gene	0.2336	0.2243	0.757	0.3867	0.6117	0.61	0.7105	0	0	0.2897	0.2222	0	0.8065	0.6667	0.7143	0.4359	0.4324	0	0.4375	0	0.1589	0.5514	0.3271	0.1963	0.4019	0.5234	0.3178	0.5421	0.6075	0.4286	0.2742	0.7581	0.4516	0.8318	0.6038	0.5	0.5068	0.2243	0.1644	0.6786	0.1863	0.5784	0.5618	24
KIF5B	Candidate gene	0.243	0.5607	0.8598	0.4	0.1456	0.17	0.8947	0.8333	0.6429	0.3178	0.6667	0.75	0.5806	0.6667	0.3571	0.8205	0.6081	0	0.4583	0	0.0467	0.4019	0.2897	0.1869	0.2897	0.5234	0.1776	0.5421	0.5421	0.5952	0.2903	0.3548	0.7581	0.4019	0.1604	0.5	0.5068	0.0748	0.2329	0.131	0.1667	0.5784	0.5618	25
NOC3L	Candidate gene	0.2523	0.6075	0.9346	0.4933	0.6117	0.61	0.6184	0	0	0.2056	0	0	0	0	0	0	0.3378	0	0	0	0.5981	0.4112	0.4953	0.6075	0.4206	0.5234	0.6729	0.5421	0.486	0	0.8065	0.4194	0.4032	0.4206	0.6038	0.5	0	0.6262	0.5616	0.4286	0.3039	0.5784	0.5618	26
U2AF2	Candidate gene	0.2617	0.6355	0.3084	0.7867	0.6117	0.61	0.7105	0	0.6429	0.5327	0.6667	0.75	0.8065	0.6667	0.7143	0.8205	0	0	0	0	0.5981	0.6075	0.4579	0.6075	0.5421	0.5234	0.6729	0.5421	0.6542	0.7143	0.3065	0.5484	0.7258	0.3832	0.6038	0.5	0.5068	0.6262	0.4384	0.6667	0.2157	0.1373	0.5618	27
OPCML	Candidate gene	0.271	0.2336	0.3645	0.28	0.6117	0.61	0.1842	0	0	0.7009	0	0	0	0	0	0	0.6081	0.6667	0	0	0.5981	0.8037	0.757	0.6075	0.785	0.5234	0.6729	0.5421	0.8692	0.2143	0.0161	0.2903	0.0484	0.5327	0.6038	0	0.5068	0.6262	0.5479	0.2619	0.1765	0.5784	0.5618	28
CCNY	Candidate gene	0.2804	0.2897	0.757	0	0.6117	0.61	0.7105	0	0	0.5607	0	0	0	0	0	0	0.473	0	0	0	0.5981	0.2243	0.2336	0.1308	0.2523	0.5234	0.1682	0.5421	0.1869	0	0	0	0	0.8318	0.6038	0.5	0.5068	0.6262	0.6438	0.2262	0.4412	0.5784	0.5618	29
DDX19A	Candidate gene	0.2897	0.5701	0.8411	0	0.6117	0.61	0	0	0	0.7103	0	0	0	0	0	0	0	0	0	0	0.5981	0.3925	0.5047	0.6075	0.3084	0.5234	0.6729	0.5421	0.5514	0.6667	0.5806	0.3387	0.6129	0.8318	0.6038	0.5	0.5068	0.6262	0.3562	0.131	0.3627	0.5784	0.5618	30
MYO6	Candidate gene	0.2991	0.1028	0.7944	0.4667	0.6117	0.61	0.8947	0	0	0.4673	0.3056	0	0.5806	0.6667	0.7143	0.8205	0.7027	0.6667	0.3333	0.5926	0.1495	0.5327	0.2523	0.6075	0.3458	0.5234	0.6729	0.5421	0.3551	0.4048	0.371	0.629	0.629	0.8318	0.6038	0.5	0	0.6262	0	0.131	0.3922	0.5784	0.5618	31
AARS	Candidate gene	0.3084	0.1495	0.3925	0.8267	0.6117	0.61	0.8947	0.8333	0.6429	0.2991	0.6667	0	0	0.6667	0.7143	0.8205	0	0.6667	0.7917	0.7037	0.5981	0.5701	0.4299	0.6075	0.5607	0.5234	0.6729	0.5421	0.6729	0.619	0.1774	0.7097	0.4194	0.1308	0.6038	0.5	0.5068	0.6262	0.4658	0.4762	0.2941	0.5784	0.5618	32
HDDC2	Candidate gene	0.3178	0.7477	0.6075	0.8133	0.6117	0.61	0.7105	0	0.6429	0.6262	0	0	0	0	0	0	0.6081	0	0	0	0.5981	0.2243	0.757	0.6075	0.4299	0.5234	0.6729	0.5421	0.2336	0.5476	0.0645	0.5161	0.5968	0.3458	0.1604	0.5	0.5068	0.6262	0.5753	0.619	0.902	0.5784	0.5618	33
TTYH1	Candidate gene	0.3271	0.7196	0.243	0.9867	0.6117	0.61	0.3816	0	0	0.6542	0.6667	0	0	0	0.7143	0	0	0	0.7083	0	0.5981	0.2243	0.1963	0.6075	0.2056	0.5234	0.6729	0.5421	0.2336	0	0.3548	0.2419	0.0806	0.486	0.6038	0.5	0.5068	0.6262	0.3836	0.8333	0.2647	0.5784	0.5618	34
CFDP1	Candidate gene	0.3364	0.4673	0.6075	0.56	0.6117	0.61	0	0	0	0.729	0	0	0	0	0	0	0.6081	0	0	0	0.5981	0.3458	0.2523	0.6075	0.2336	0.5234	0.6729	0.5421	0.2897	0.7619	0.7097	0.5323	0.9032	0.1215	0.1604	0.5	0.5068	0.6262	0	0.75	0.0784	0.5784	0.5618	35
CDH5	Candidate gene	0.3458	0.271	0.1121	0.5067	0.6117	0.61	0.1842	0.8333	0.6429	0.1589	0.6667	0	0.5806	0.6667	0.7143	0.3846	0	0	0.3958	0.8148	0.0935	0.8037	0.3178	0.6075	0.4486	0.5234	0.3271	0.5421	0.7196	0.4524	0.9677	0.1774	0.6935	0.8318	0.6038	0.5	0.5068	0.6262	0.4247	0.0714	0.1961	0.5784	0.5618	36
GRIK4	Candidate gene	0.3551	0.3084	0.3551	0.32	0.1748	0.14	0.1842	0.4167	0	0.4486	0.3056	0	0.9355	0	0.3929	0.5128	0.4865	0	0.6042	0	0.5981	0.8037	0.1963	0.6075	0.785	0.5234	0.6729	0.5421	0.8692	0	0.6452	0.1613	0.3226	0.4112	0.6038	0.5	0	0.1963	0.7534	0.381	0.402	0	0	37
SLC17A5	Candidate gene	0.3645	0.6822	0.243	0.6133	0.6117	0.61	0.4079	0	0.6429	0.2804	0.6667	0	0	0.6667	0.7143	0.8205	0.8919	0.6667	0.3125	0.3704	0.5981	0.1682	0.757	0.6075	0.2523	0.5234	0.6729	0.5421	0.1776	0	0.129	0.9194	0.6774	0.8318	0.6038	0.5	0.5068	0.6262	0.137	0.0952	0.5	0.5784	0.5618	38
SEMA3E	Candidate gene	0.3738	0.1589	0.3271	0.6933	0.6117	0.61	0.5263	0	0	0.514	0.6667	0	0	0.6667	0.7143	0.359	0.6081	0.6667	0.5417	0.6296	0.5981	0.8037	0.757	0.6075	0.785	0.5234	0.6729	0.5421	0.8692	0.5	0.5968	0.2742	0.9516	0.5794	0.6038	0.5	0.5068	0.6262	0.2466	0.0119	0.8824	0.5784	0.5618	39
UBASH3B	Candidate gene	0.3832	0.8785	0.3925	0.5867	0.6117	0.61	0.7105	0	0.6429	0.6916	0	0	0	0	0	0	0.2973	0	0	0	0.5981	0.5794	0.4486	0.6075	0.5047	0.5234	0.6729	0.5421	0.3458	0	0	0	0	0.1121	0.1604	0.5	0.5068	0.6262	0.9726	0.4286	0.5686	0.5784	0.5618	40
RPS5	Candidate gene	0.3925	0.6262	0.3925	0.9333	0.6117	0.61	0	0	0.6429	0.5701	0.6667	0.75	0	0.6667	0.7143	0.8205	0	0	0	0	0.5981	0.5888	0.486	0.6075	0.5327	0.5234	0.6729	0.5421	0.729	0.0952	0.871	0.6129	0.5	0.8318	0.0566	0.5	0.5068	0.6262	0.5342	0.869	0.0098	0.5784	0.5618	41
GLG1	Candidate gene	0.4019	0.243	0.243	0.44	0.6117	0.61	0.1842	0	0	0.2523	0	0	0	0	0.7143	0.8205	0.8919	0	0.625	0	0.5981	0.4393	0.757	0.6075	0.3738	0.5234	0.6729	0.5421	0.5701	0.7381	0.3871	0.5968	0.8548	0.8318	0.1604	0.5	0.5068	0.6262	0.3014	0.5952	0.5098	0.5784	0.5618	42
PPIC	Candidate gene	0.4112	0.4579	0.9346	0	0.6117	0.61	0.1842	0.8333	0.6429	0.4206	0	0	0	0	0	0	0.6081	0	0	0	0.5981	0.2897	0.757	0.6075	0.3551	0.5234	0.6729	0.5421	0.3084	0.381	0.6613	0.6935	0.2258	0.8318	0.6038	0.5	0.5068	0.6262	0.3699	0.1548	0.7059	0.5784	0.5618	43
STX12	Candidate gene	0.4206	0.4019	0.4766	0.84	0.6117	0.61	0.4079	0	0	0.7383	0.25	0	0	0	0.7143	0	0	0	0	0	0.5981	0.4206	0.2804	0.6075	0.4579	0.5234	0.2897	0.5421	0.486	0.3571	0.4194	0.4032	0.7419	0.8318	0.1604	0.5	0	0.6262	0.9178	0.7143	0.1569	0.5784	0.5618	44
TPD52L1	Candidate gene	0.4299	0.4206	0.6075	0.64	0.6117	0.61	0.8947	0	0	0.1963	0.6667	0	0	0	0.7143	0	0.7703	0	0	0	0.5981	0.486	0.4019	0.6075	0.785	0.5234	0.6729	0.5421	0.7009	0.7857	0.7581	0.8548	0.3871	0.6542	0.0566	0.5	0.5068	0.6262	0.411	0.3095	0.3431	0.5784	0.5618	45
ZFHX3	Candidate gene	0.4393	0.2523	0.6075	0.5733	0.6117	0.61	0.8947	0	0.6429	0.2617	0	0	0	0.6667	0.7143	0.8205	0.2432	0.6667	0.875	0.963	0.5981	0.3738	0.757	0.6075	0.4019	0.5234	0.6729	0.5421	0.4206	0	0	0	0	0.4299	0.6038	0.5	0.5068	0.6262	0.2192	0.0357	0.0392	0.5784	0.5618	46
UNC79	Candidate gene	0.4486	0.5327	0.4486	0.4533	0.6117	0.61	0	0	0	0.9159	0.6667	0	0	0	0.7143	0	0.6081	0	0.8542	0	0.5981	0.2243	0.1963	0.6075	0.2523	0.5234	0.6729	0.5421	0.2336	0	0	0	0	0.5607	0.6038	0.5	0.5068	0.6262	0.8219	0.2381	0	0	0.5618	47
SNX24	Candidate gene	0.4579	0.6168	0.757	0	0.6117	0.61	0.5263	0	0	0.4579	0	0	0	0	0	0	0.8919	0	0	0	0.5981	0.3178	0.757	0.6075	0.785	0.5234	0.6729	0.5421	0.3738	0	0.629	0.5806	0.4355	0.8318	0.6038	0.5	0.5068	0.6262	0.2877	0.7976	0.4608	0.5784	0.5618	48
CLNS1A	Candidate gene	0.4673	0.5514	0.3925	0.7333	0.6117	0.61	0	0	0.6429	0.4953	0.6667	0	0	0.6667	0.7143	0.8205	0.8919	0	0.7083	0	0.5981	0.5607	0.3832	0.1682	0.3925	0.5234	0.6729	0.5421	0.7103	0.5714	0.9194	0.4839	0.5323	0.8318	0.1604	0.5	0.5068	0.6262	0.5205	0.619	0.8333	0.5784	0.5618	49
MTO1	Candidate gene	0.4766	0.6729	0.6075	0.6267	0.6117	0.61	0.7105	0	0.6429	0.3084	0	0	0	0	0	0	0.8919	0.6667	0	0	0.5981	0.2243	0.4766	0.6075	0.4393	0.5234	0.6729	0.5421	0.2336	0	0.8548	0.3065	0.6613	0.8318	0.6038	0.5	0	0.6262	0.2055	0.2143	0.9412	0.5784	0.5618	50
NAT14	Candidate gene	0.486	0.4486	0.4766	0.92	0.6117	0.61	0.4079	0	0	0.6822	0	0.5	0	0	0.7143	0	0	0	0	0	0.5981	0.3551	0.757	0.6075	0.3084	0.5234	0.6729	0.5421	0.3738	0	0	0	0	0.5794	0.6038	0.5	0.5068	0.6262	0	0.9048	0.7255	0.5784	0.5618	51
CD109	Candidate gene	0.4953	0.486	0.1402	0	0.6117	0.61	0.5263	0	0	0.5047	0	0	0	0	0	0	0.3649	0	0.9792	0	0.5981	0.8037	0.757	0.6075	0.785	0.5234	0.6729	0.5421	0.8692	0	0	0	0	0.1682	0.6038	0.5	0.5068	0.6262	0.0274	0.0714	0.3725	0.5784	0.5618	52
BHLHE40	Candidate gene	0.5047	0.5421	0.9346	0.48	0.6117	0.61	0	0	0.6429	0.1869	0.6667	0.75	0.8065	0.6667	0.4107	0.5897	0.3514	0	0.3542	0.7037	0.0561	0.4953	0.757	0.1495	0.5234	0.5234	0.6729	0.5421	0.6636	0.4762	0.8871	0.9032	0.8226	0.271	0.6038	0.5	0.5068	0.6262	0.6986	0.4286	0	0.5784	0.5618	53
JAKMIP1	Candidate gene	0.514	0.5794	0.8037	0	0.6117	0	0.8947	0	0	0.7477	0	0.75	0	0	0.7143	0	0.4324	0	0	0	0.5981	0.8037	0.1776	0.6075	0.785	0.5234	0.2991	0.5421	0.6168	0	0	0	0	0.5607	0.6038	0.5	0.5068	0.6262	0.7808	0.0952	0.1373	0.5784	0.5618	54
EPS8L1	Candidate gene	0.5234	0.8785	0.6075	0	0.6117	0.61	0.7105	0	0	0.3738	0	0	0	0	0	0	0	0	0	0	0.5981	0.8037	0.3551	0.6075	0.785	0.5234	0.2243	0.5421	0.486	0	0.8387	0.871	0.8387	0.2243	0.6038	0.5	0.5068	0.6262	0.2603	0.6548	0.6569	0.5784	0.0337	55
TTYH1	Candidate gene	0.5327	0.7196	0.243	0.9867	0.6117	0.61	0	0	0	0.6542	0	0	0	0	0.7143	0	0	0	0.7083	0	0.5981	0.2243	0.757	0.6075	0.2056	0.5234	0.6729	0.5421	0.2336	0	0	0	0	0.486	0.6038	0	0	0.6262	0	0	0.2647	0.5784	0	56
EPS8L1	Candidate gene	0.5514	0.8785	0.6075	0	0.6117	0.61	0	0	0	0.3738	0	0	0	0	0	0	0	0	0	0	0.5981	0.8037	0.757	0.6075	0.785	0.5234	0.2243	0.5421	0.486	0	0	0	0	0.2243	0.6038	0	0	0.6262	0	0	0.6569	0.5784	0.0337	58
KIAA1217	Candidate gene	0.5607	0.3458	0.3271	0.4267	0.6117	0.61	0.8947	0	0	0.5888	0	0	0	0	0	0	0.6892	0	0.8333	0	0.5981	0.4673	0.3925	0.6075	0.785	0.5234	0.6729	0.5421	0.5981	0	0	0	0	0.8318	0.6038	0.5	0.5068	0.6262	0.9041	0.4286	0.4314	0.5784	0.5618	59
PGLS	Candidate gene	0.5701	0.9439	0.3925	0	0.6117	0.61	0.5263	0	0.6429	0.4766	0.6667	0.75	0.8065	0.6667	0.7143	0.8205	0	0	0	0	0.5981	0.4393	0.4673	0.6075	0.486	0.5234	0.6729	0.5421	0.5701	0	1	0.4516	0.1935	0.8318	0.6038	0.5	0.5068	0.6262	0.3973	0.619	0.2451	0.5784	0.0337	60
DDX19B	Candidate gene	0.5794	0.7009	0.757	0.88	0.6117	0.61	0.7105	0	0.6429	0.8972	0	0	0	0	0	0	0	0	0	0	0.5981	0.4393	0.4393	0.6075	0.514	0.5234	0.6729	0.5421	0.6355	0	0	0	0	0.8318	0.6038	0	0.5068	0.6262	0.274	0.3571	0.4216	0.5784	0.5618	61
SF3B3	Candidate gene	0.5888	0.9439	0.6075	0.5333	0.6117	0.61	0.7105	0	0	0.5421	0.6667	0.75	0.8065	0	0.7143	0.8205	0.8919	0	0	0	0.5981	0.5981	0.4206	0.2056	0.5514	0.5234	0.2804	0.5421	0.6262	0	0.9516	0.3871	0.5645	0.5421	0.1604	0.5	0.5068	0.6262	0	0.4762	0.0686	0.5784	0.5618	62
ZNF667	Candidate gene	0.5981	0.7944	0.9346	0.5333	0.6117	0.61	0	0	0	0.9439	0.6667	0	0	0	0	0	0.6081	0	0	0	0.5981	0.3178	0.757	0.6075	0.2523	0.5234	0.6729	0.5421	0.3271	0	0.6129	0.6774	0.1774	0.6355	0.6038	0.5	0.5068	0.6262	0	0.9524	0.5392	0.5784	0.5618	63
SLC27A1	Candidate gene	0.6075	0.2617	0.4766	0	0.6117	0.61	0.1842	0	0.6429	0.243	0.6667	0	0	0	0.7143	0.8205	0.7297	0	0.8958	0.8889	0.5981	0.8037	0.757	0.6075	0.785	0.5234	0.6729	0.5421	0.8692	0	0	0	0	0.8318	0.6038	0.5	0.5068	0.6262	0.1918	0.0714	0.8922	0.5784	0.5618	64
FCAR	Candidate gene	0.6168	0.514	0.243	0.36	0.6117	0.61	0.1842	0	0.6429	0.972	0	0	0.4194	0	0.7143	0	0.1892	0	0	0.5185	0.5981	0.8037	0.3551	0.6075	0.785	0.5234	0.6729	0.5421	0.8692	0.5238	0.2258	0.0968	0.7903	0.3178	0.6038	0.5	0.5068	0.6262	0	0.7738	0.9706	0.5784	0.5618	65
LENG8	Candidate gene	0.6262	0.7477	0.6075	0	0.6117	0.61	0	0	0	0.8037	0	0	0	0	0	0	0	0	0	0	0.5981	0.8037	0.3551	0.6075	0.785	0.5234	0.6729	0.5421	0.8692	0	0	0	0	0.8318	0.6038	0	0.5068	0.6262	0.6164	0.8095	0.549	0.5784	0.5618	66
EPS8L1	Candidate gene	0.6355	0.8785	0.6075	0	0.6117	0.61	0	0	0	0.3738	0	0	0	0	0	0	0	0	0	0	0.5981	0.8037	0.757	0.6075	0.785	0.5234	0.2243	0.5421	0.486	0	0	0	0	0.2243	0.6038	0	0	0.6262	0	0	0.6569	0.5784	0	67
SLC35F3	Candidate gene	0.7009	0.8318	0.4486	0	0.6117	0.61	0.1842	0	0	0.9907	0	0	0	0	0	0	0.3919	0	0	0	0.5981	0.2243	0.757	0.6075	0.785	0.5234	0.6729	0.5421	0.2336	0	0	0	0	0.5607	0.6038	0.5	0	0.6262	0.7671	0.7857	0.5882	0.5784	0.5618	74
KLK4	Candidate gene	0.7103	0.2804	0.1589	0.52	0.6117	0.61	0.1842	0	0.6429	0.8598	0	0	0	0.6667	0.7143	0	0.6081	0.6667	0.8125	0.963	0.5981	0.8037	0.757	0.6075	0.785	0.5234	0.6729	0.5421	0.8692	0	0	0	0	0.6449	0.6038	0.5	0.5068	0.6262	0.4521	0.3214	0.8529	0.5784	0.5618	75
TECTA	Candidate gene	0.7196	0.4299	0.4393	0.8533	0.6117	0.61	0.5263	0	0	0.9439	0	0	0	0	0	0	0.8919	0.6667	0.7708	0.7778	0.1308	0.8037	0.757	0.6075	0.785	0.5234	0.6729	0.5421	0.8692	0	0.4032	0.2581	0.3387	0.8318	0.6038	0.5	0.5068	0.6262	0.0685	0.0476	0.098	0	0	76
GLE1	Candidate gene	0.729	0.6822	0.6075	0.72	0.6117	0.61	0.8947	0	0.6429	0.5981	0	0	0	0	0	0	0.8919	0.6667	0.9583	0.7037	0.5981	0.3178	0.757	0.6075	0.3738	0.5234	0.6729	0.5421	0.3271	0.6905	0.2097	0.9355	0.8065	0.3551	0.1604	0.5	0.5068	0.6262	0	0.4286	0.2843	0.5784	0.5618	77
HYDIN	Candidate gene	0.7383	0.9813	0.6075	0.6533	0.6117	0.61	0.8947	0	0	0.6355	0	0	0	0	0	0	0.8919	0.6667	0	0.3704	0.5981	0.2243	0.757	0.6075	0.785	0.5234	0.6729	0.5421	0.2336	0	0.4677	0.0645	0.6452	0.8318	0.6038	0.5	0.5068	0.2336	0.7397	0.5476	0	0.5784	0.5618	78
IMPG1	Candidate gene	0.7477	0.4112	0.1589	0.68	0.6117	0.61	0.5263	0	0.6429	0.8785	0	0	0	0	0	0	0.3784	0	0	0	0.5981	0.8037	0.757	0.6075	0.785	0.5234	0.6729	0.5421	0.8692	0.9524	0.6935	0.2258	0.3548	0.8318	0.6038	0.5	0	0.6262	0.8082	0.2976	0.3137	0.5784	0.5618	79
LENG8	Candidate gene	0.757	0.7477	0.6075	0	0.6117	0.61	0	0	0	0.8037	0	0	0	0	0	0	0	0	0	0	0.5981	0.8037	0.757	0.6075	0.785	0.5234	0.6729	0.5421	0.8692	0	0	0	0	0.8318	0.6038	0	0	0.6262	0	0	0.549	0.5784	0.5618	80
PRIMA1	Candidate gene	0.7664	0.3925	0.243	0.7067	0	0	0.1842	0	0.6429	0.5514	0	0	0	0	0	0	0.6081	0	0.6667	0	0.5981	0.8037	0.757	0.6075	0.785	0.5234	0.6729	0.5421	0.8692	0	0	0	0	0.8318	0.6038	0	0.5068	0.6262	0.9452	0.5119	0.5294	0.5784	0.5618	81
VAC14	Candidate gene	0.7757	0.3645	0.8411	0.7467	0.6117	0.61	0.8947	0	0.6429	0.6729	0.6667	0	0	0	0.7143	0	0.8919	0	0.375	0	0.5981	0.5327	0.4112	0.6075	0.785	0.5234	0.6729	0.5421	0.6822	0	0.4355	0.9677	0.9355	0.3645	0.1604	0.5	0.5068	0.6262	0.4932	0.4286	0.4608	0.5784	0.5618	82
ZNF274	Candidate gene	0.785	0.6636	0.6075	0.8667	0.6117	0.61	0	0	0.6429	0.3271	0.6667	0	0.7097	0.2083	0.7143	0.4103	0	0	0	0	0.0374	0.8037	0.271	0.6075	0.785	0.5234	0.6729	0.5421	0.8692	0.3333	0.5645	0.8387	0.7097	0.3832	0.6038	0.5	0.5068	0.6262	0.9315	0.9524	0.9216	0.5784	0.5618	83
DYRK3	Candidate gene	0.7944	0.2056	0.6075	0.76	0.6117	0.61	0	0	0	0.6075	0	0	0	0	0.7143	0	0	0	0.9167	0	0.5981	0.8037	0.757	0.6075	0.785	0.5234	0.6729	0.5421	0.8692	0	0	0	0	0.8318	0.6038	0	0	0.6262	0	0	0.4804	0.5784	0.5618	84
KIAA1191	Candidate gene	0.8037	0.9813	0.6075	0.96	0.6117	0.61	0	0	0	0.7664	0	0	0	0	0	0	0.7027	0	0	0	0.5981	0.4673	0.2991	0.6075	0.785	0.5234	0.6729	0.5421	0.5888	0	0	0	0	0.8318	0.6038	0	0.5068	0.6262	0.6027	0.7143	0.3529	0.5784	0.5618	85
COG4	Candidate gene	0.8131	0.6449	0.757	0.9067	0.6117	0.61	0.8947	0	0.6429	0.4299	0	0	0	0	0	0	0	0.6667	0	0.963	0.5981	0.514	0.3364	0.6075	0.4766	0.5234	0.6729	0.5421	0.6822	0.9286	0.7742	0.7742	0.9677	0.5047	0.6038	0.5	0.5068	0.6262	0.3288	0.6786	0.3824	0.5784	0.5618	86
ODF2	Candidate gene	0.8224	0.3832	0.8318	0.6	0.6117	0	0.5263	0	0.6429	0.5234	0.6667	0	0	0.6667	0.7143	0.8205	0.8919	0	0.2708	0	0.5981	0.2991	0.757	0.6075	0.3084	0.5234	0.6729	0.5421	0.2897	1	0.9839	0.9839	0.7742	0.1776	0.0094	0.5	0.5068	0.6262	0.9589	0.75	0.2353	0.5784	0.5618	87
KLK11	Candidate gene	0.8318	0.5981	0.3271	0.6667	0.6117	0.61	0.5263	0	0.6429	0.7196	0	0	0	0	0	0	0.527	0	0	0	0.5981	0.8037	0.757	0.6075	0.785	0.5234	0.6729	0.5421	0.8692	0.8095	0.9355	0.4355	0.9839	0.3364	0.6038	0.5	0.5068	0.6262	0.6575	0.25	0.9118	0.5784	0.5618	88
TBCEL	Candidate gene	0.8411	0.9813	0.9346	0	0.6117	0.61	0.8947	0	0	0.7944	0	0	0	0	0	0	0.8919	0	0	0	0.5981	0.2243	0.757	0.6075	0.2056	0.5234	0.6729	0.5421	0.2336	0	0.5484	0.9516	0.5161	0.3738	0.6038	0.5	0.5068	0.6262	0.6712	0.4286	0.2255	0.5784	0.5618	89
ZNF8	Candidate gene	0.8505	0.4953	0.9346	0	0.6117	0.61	0	0	0	0.8692	0	0	0	0	0	0	0	0	0	0	0.5981	0.8037	0.757	0.6075	0.4953	0.5234	0.6729	0.5421	0.8692	0	0.3226	0.8871	0.5806	0.1495	0.6038	0.5	0.5068	0.6262	0.8767	0.9524	0.451	0.5784	0.5618	90
DEPDC4	Candidate gene	0.8598	0.4766	0.6075	0	0.6117	0.61	0	0	0	0.9346	0	0	0	0	0	0	0	0	0	0	0.5981	0.8037	0.757	0.6075	0.785	0.5234	0.6729	0.5421	0.8692	0	0	0	0	0.8318	0.6038	0.5	0.5068	0.215	0.8904	0.881	0.8627	0.5784	0.5618	91
FCAR	Candidate gene	0.8692	0.514	0.243	0.36	0.6117	0	0	0	0	0.972	0	0	0.4194	0	0.7143	0	0.1892	0	0	0.5185	0.5981	0.8037	0.757	0.6075	0.785	0.5234	0.6729	0.5421	0.8692	0	0	0	0	0.3178	0.6038	0	0	0.6262	0	0	0.9706	0.5784	0.5618	92
DDX28	Candidate gene	0.8785	0.9439	0.9346	0.8933	0.6117	0.61	0.6184	0	0	0.785	0	0	0	0	0	0	0	0	0	0	0.5981	0.8037	0.757	0.6075	0.785	0.5234	0.6729	0.5421	0.8692	0.881	0.5323	0.8065	0.4839	0.4673	0.6038	0.5	0.5068	0.6262	0.3151	0.1905	0.9314	0.5784	0.5618	93
FRMPD2	Candidate gene	0.8879	0.6542	0.757	0	0.6117	0.61	0.5263	0	0	0.8318	0	0	0	0	0	0	0.8919	0	0	0	0.5981	0.8037	0.757	0.6075	0.785	0.5234	0.6729	0.5421	0.8692	0	0	0	0	0.8318	0.6038	0.5	0.5068	0.6262	0.6849	0.3333	1	0.5784	0.5618	94
ZNF544	Candidate gene	0.8972	0.7944	0.9346	0	0.6117	0.61	0	0	0	0.7757	0.6667	0	0	0	0	0	0.8919	0	0	0	0.5981	0.8037	0.757	0.6075	0.785	0.5234	0.6729	0.5421	0.8692	0	0.0968	0.6452	0.9194	0.8318	0.6038	0.5	0.5068	0.6262	0	0.9524	0.1176	0.5784	0.5618	95
PMFBP1	Candidate gene	0.9065	0.9813	0.6075	0	0	0	0.8947	0	0	0.8505	0	0	0	0	0	0	0.8919	0	0	0	0.5981	0.8037	0.757	0.6075	0.785	0.5234	0.6729	0.5421	0.8692	0	0.5161	0.7258	0.5484	0.8318	0.6038	0.5	0.5068	0.243	0.726	0.75	0.7353	0.5784	0.5618	96
ZNF583	Candidate gene	0.9159	0.7944	0.9346	0	0.6117	0.61	0	0	0	0.8411	0.6667	0	0	0	0	0	0	0	0	0	0.5981	0.8037	0.757	0.6075	0.785	0.5234	0.6729	0.5421	0.8692	0	0	0	0	0.8318	0.6038	0.5	0.5068	0.6262	0	0.9524	0.598	0.5784	0.5618	97
FCAR	Candidate gene	0.9252	0.514	0.243	0.36	0	0	0	0	0	0.972	0	0	0.4194	0	0.7143	0	0.1892	0	0	0.5185	0.5981	0.8037	0.757	0.6075	0.785	0.5234	0.6729	0.5421	0.8692	0	0	0	0	0.3178	0.6038	0	0	0.6262	0	0	0.9706	0.5784	0	98
ZNF329	Candidate gene	0.9346	0.7944	0.9346	0	0.6117	0.61	0	0	0	0.486	0	0	0	0	0	0	0.8919	0	0	0	0.5981	0.8037	0.757	0.6075	0.785	0.5234	0.6729	0.5421	0.8692	0	0.6774	0.8226	0.8871	0.8318	0.6038	0.5	0.5068	0.6262	0.7945	0.9524	0.5098	0.5784	0.5618	99
ZNF784	Candidate gene	0.9439	0.7944	0.9346	0	0.6117	0.61	0.7105	0	0	1	0	0	0	0	0	0	0.3919	0	0	0	0.5981	0.8037	0.1682	0.6075	0.1776	0.5234	0.6729	0.5421	0.8692	0	0	0	0	0.8318	0.6038	0.5	0.5068	0.6262	0.4795	0.9524	0.6078	0.5784	0.1011	100
NLRP5	Candidate gene	0.9533	0.3551	0.9346	0	0.6117	0.61	0.5263	0	0	0.757	0	0	0	0	0	0	0.4324	0	1	0	0.5981	0.2243	0.757	0.6075	0.2056	0.5234	0.6729	0.5421	0.2336	0	0	0	0	0.8318	0	0.5	0	0.6262	0.863	0.8452	0.951	0.5784	0.5618	101
ZNF581	Candidate gene	0.9626	0.7944	0.9346	0	0.6117	0.61	0.7105	0	0	0.8879	0	0	0	0	0	0	0.6081	0	0	0	0.5981	0.5327	0.757	0.1682	0.4579	0.5234	0.6729	0.5421	0.4206	0	0	0	0	0.8318	0.6038	0	0.5068	0.6262	1	0.9524	0.5784	0.5784	0.5618	102
ZNF530	Candidate gene	0.972	0.7944	0.9346	0	0.6117	0.61	0.7105	0	0	0.8224	0.6667	0	0	0	0	0	0	0	0	0	0.5981	0.8037	0.757	0.6075	0.785	0.5234	0.6729	0.5421	0.8692	0	0	0	0	0.8318	0.6038	0	0.5068	0.6262	0.9863	0.8929	0.8725	0.5784	0.5618	103
KLK12	Candidate gene	0.9813	0.4393	0.3271	0.8	0.6117	0.61	0.5263	0	0.6429	0.9065	0	0	0	0	0	0	0.8919	0	0	0	0.5981	0.8037	0.757	0.6075	0.785	0.5234	0.6729	0.5421	0.8692	0	0.8226	0.5	1	0.8318	0.6038	0.5	0.5068	0.6262	0	0.1548	0.9902	0	0.5618	104
CCDC106	Candidate gene	0.9907	0.9813	0.9346	0.9467	0	0	0.8947	0	0	0.9252	0	0	0	0	0	0	0	0	0	0	0.5981	0.4953	0.757	0.6075	0.785	0.5234	0.6729	0.5421	0.6449	0.8333	0.7419	0.7903	0.3065	0.5981	0.6038	0.5	0.5068	0.6262	0.8356	0.8095	0.8431	0.5784	0.5618	105
DYRK3	Candidate gene	1	0.2056	0.6075	0.76	0.6117	0.61	0	0	0	0.6075	0	0	0	0	0.7143	0	0	0	0.9167	0	0.5981	0.8037	0.757	0.6075	0.785	0.5234	0.6729	0.5421	0.8692	0.9762	0.9032	1	0.871	0.8318	0.6038	0.5	0	0.6262	0.589	0.5476	0.4804	0.5784	0.5618	106

## Sheet: WorkingCow_CNS
Gene name	Group	P-value	Annotation â€“ Gene Ontology	Annotation â€“ UniProt	Text-mining	Annotation â€“ InterPro	Annotation â€“ Pfam	Annotation â€“ SIMAP (localization)	Annotation â€“ DrugBank	Annotation â€“ Stitch	Annotation â€“ RGD ChEBI	Annotation â€“ Reactome	Annotation â€“ WikiPathways	Annotation â€“ RGD pathways	Annotation â€“ BioCarta	Annotation â€“ CPDB	Annotation â€“ hiPathDB	Annotation â€“ GAD	Annotation â€“ OMIM	Annotation â€“ RGD MP	Annotation â€“ RGD RDO	Interaction â€“ String	Interaction â€“ BioGrid	Interaction â€“ I2D	Interaction â€“ IntAct	Interaction â€“ iRefIndex	Interaction â€“ Mint	Interaction â€“ HPRD	Interaction â€“ MIPS	Interaction â€“ GeneRIF	Expression â€“ Su et al (2002)	Expression â€“ Su et al (2004)	Expression â€“ CMAP	Expression â€“ Lukk et al	Annotation â€“ PaGenBase	Annotation â€“ CGAP	Annotation â€“ GNF	Annotation â€“ eGenetics	Blast	Precalculated â€“ Ouzounis	Precalculated â€“ Prospectr	Precalculated â€“ HaploPred	Annotation â€“ Aura	Annotation â€“ mirZ	id
LTB	Training gene	0.0085	0.0345	0.0339	0.0404	0.037	0.0467	0.1707	0	0	0.0603	0	0	0.08	0	0.0548	0.102	0.0408	0	0.069	0	0.0593	0.0763	0.0763	0.0593	0.0763	0.5254	0.0763	0.0424	0.0763	0.1892	0.8246	0.0877	0.1404	0.0345	0.0446	0	0	0.0593	0	0	0.7658	0.0385	0.0595	0
GRIN1	Training gene	0.0763	0.1983	0.2203	0.1515	0.1019	0.0935	0.1707	0.0435	0.0732	0.181	0.3333	0.0741	0.54	0.1905	0.1644	0.3878	0.1939	0.1333	0.2241	0.0286	0.1102	0.0763	0.0763	0.0593	0.0763	0.0254	0.0763	0.0424	0.0763	0.0541	0.0526	0.0175	0.0351	0.3879	0.625	0.5	0.5	0.0593	0.1944	0.2436	0.3514	0.1058	0.0238	8
BDNF	Training gene	0.0847	0.1293	0.1356	0.1212	0.1204	0.1589	0.1707	0	0.0244	0.0603	0	0.1852	0.38	0.0952	0.1507	0.4898	0.1224	0.0333	0.2069	0.1714	0.0508	0.0763	0.0763	0.0593	0.0763	0.0254	0.0763	0.5424	0.0763	0.027	0.3158	0.1404	0.2105	0.569	0.625	0.5	0.5	0.0593	0.0417	0.4744	0.027	0.1442	0.5476	9
CXCL12	Training gene	0.0932	0.0862	0.0847	0.1818	0.1852	0.1682	0.6951	0.3913	0.1951	0.0603	0.1212	0.3333	0.18	0.0476	0.1233	0.2041	0.0918	0.1667	0	0.2	0.1356	0.0763	0.0763	0.0593	0.0763	0.0254	0.0763	0.5424	0.0763	0.1622	0.6491	0.2105	0.2281	0.1121	0.625	0.5	0.5	0.1356	0.0972	0.7051	0.0991	0.1346	0.0238	10
GRM1	Training gene	0.1017	0.181	0.2203	0.1717	0.0926	0.1028	0.1707	0.1739	0.2439	0.1897	0.1818	0.1111	0.5	0.3333	0.1918	0.3469	0.1633	0.1	0.1897	0.2857	0.1017	0.0763	0.0763	0.5763	0.0763	0.0254	0.0763	0.5424	0.0763	0.0811	0.1053	0.0351	0.0702	0.1293	0.625	0.5	0.5	0.0593	0.0278	0.2436	0.3153	0.5769	0.5476	11
NPY	Training gene	0.1102	0.1207	0.3983	0.1616	0.1574	0.1495	0.1707	0.3478	0.3415	0.1207	0.0606	0	0.7	0	0.1781	0.2449	0.102	0	0.431	0.0571	0.0085	0.0763	0.0763	0.0593	0.0763	0.0254	0.0763	0.5424	0.0763	0.1081	0.4912	0.1053	0.1228	0.3276	0.625	0.5	0.5	0.1525	0.0694	0.4487	0.1081	0.5769	0.5476	12
GAL	Training gene	0.1186	0.1379	0.1441	0.1414	0.1111	0.1121	0.1707	0	0.1707	0.1552	0.0606	0	0	0.4286	0.2055	0.2245	0.2143	0	0.2586	0.0857	0.0085	0.0763	0.0763	0.5763	0.0763	0.5254	0.0763	0.5424	0.0763	0.3514	0.4211	0.193	0.193	0.3966	0.625	0.5	0.5	0.1441	0.3889	0.4487	0.0901	0.5769	0.5476	13
KIF5C	Training gene	0.1271	0.3276	0.822	0.0909	0.1296	0.1308	0.939	0	0	0.2241	0	0	0	0	0.274	0	0.5408	0	0.5172	0	0.6102	0.0763	0.0763	0.0593	0.0763	0.5254	0.0763	0.5424	0.0763	0	0.2982	0.3509	0.0175	0.3103	0.625	0.5	0	0.0593	0.5694	0.3205	0.045	0.1058	0.0595	14
APP	Candidate gene	0.1356	0.0948	0.1102	0.4141	0.5926	0.5888	0.1707	0.7391	0.0976	0.0603	0.0606	0.2222	0.46	0.2857	0.2329	0.3673	0.5102	0.6	0.3793	0.1429	0.0339	0.7373	0.2373	0.5763	0.3814	0.0508	0.2119	0.5424	0.7627	0.2162	0.2632	0.6667	0.4211	0.7931	0.1696	0.5	0.5	0.6102	0.0139	0.359	0.009	0.1058	0.5476	15
CYP2D6	Training gene	0.1441	0.5603	0.7797	0.2222	0.1667	0.5888	0.1707	0.087	0.3171	0.0603	0.303	0.1481	1	0.1429	0.4658	0.5306	0.1429	0.0667	0	0.3429	0.178	0.0763	0.0763	0.5763	0.0763	0.5254	0.6186	0.5424	0.0763	0.2973	0	0	0	0.1638	0.625	0	0.5	0.0593	0.125	0.2051	0	0	0.5476	16
TNFSF4	Training gene	0.1525	0.0776	0.0763	0.1111	0.0833	0.0467	0.5	0	0.2927	0.1724	0	0	0	0	0.7397	0.102	0.1531	0.2	0.5	0.5714	0.178	0.8729	0.0763	0.5763	0.0763	0.5254	0.0763	0.5424	0.0763	0.1351	0.193	0.1228	0.2456	0.1466	0.625	0.5	0.5	0.1271	0.8333	0.9359	0.4144	0.5769	0.5476	17
DRD2	Candidate gene	0.161	0.1034	0.2203	0.1919	0.5926	0.5888	0.5	0.2174	0.6829	0.1293	0.1515	0.037	0.96	0.3333	0.2192	0.449	0.1735	0.6	0.1552	0.1143	0.0254	0.8729	0.2542	0.5763	0.3305	0.5254	0.2119	0.5424	0.4746	0.9189	0.1404	0.386	0.386	0.1552	0.625	0.5	0.5	0.6102	0.1528	0.141	0.5586	0.5769	0.5476	18
KIF5C	Training gene	0.1695	0.3276	0.822	0.0909	0.1296	0.1308	0.939	0	0	0.2241	0	0	0	0	0.274	0	0.5408	0	0.5172	0	0.6102	0.0763	0.7034	0.5763	0.0763	0.5254	0.0763	0.5424	0.0763	0	0	0	0	0.3103	0.625	0	0	0.0593	0	0	0.045	0.1058	0.0595	19
SLC1A2	Candidate gene	0.178	0.1724	0.2203	0.404	0.5926	0.5888	0.5	0.2609	0.0488	0.1638	0.5152	0	0.52	0	0.2466	0.5102	0.2857	0	0.3448	0.4571	0.0932	0.8729	0.1949	0.5763	0.7797	0.5254	0.6186	0.5424	0.8814	0.2703	0.0877	0.4912	0.1053	0.5776	0.625	0.5	0.5	0.6102	0.1111	0.0385	0.1441	0.5769	0.5476	20
GRID2	Candidate gene	0.1864	0.319	0.322	0.5758	0.1481	0.1215	0.1707	0.2609	0.6829	0.3534	0	0	0.94	0	0.4247	0.4082	0.449	0	0.3103	0	0.0763	0.8729	0.2458	0.5763	0.3983	0.5254	0.178	0.5424	0.5593	0	0.386	0.1754	0.3509	0.5603	0.625	0.5	0.5	0.161	0.3194	0.359	0.3243	0	0	21
COL4A1	Candidate gene	0.1949	0.2328	0.1271	0.4444	0.5926	0.5888	0.6951	0	0.6829	0.1466	0.3939	0.7407	0.42	0.7143	0.137	0.7755	0.1327	0.6	0.2759	0.3143	0.6102	0.5	0.3983	0.5763	0.4237	0.5254	0.2288	0.5424	0.5254	0.5676	0.9825	0.6316	0.3684	0.2759	0.625	0.5	0	0.6102	0	0.0128	0.027	0.5769	0.5476	22
TRPC3	Candidate gene	0.2034	0.2155	0.2203	0.5354	0.5926	0.5888	0.3659	0	0.1463	0.4224	0.2424	0	0	0.7143	0.7397	0.4286	0.8061	0	0.3621	0.8	0.0847	0.4831	0.2034	0.5763	0.2542	0.5254	0.1695	0.5424	0.3644	0.3784	0.1228	0.2281	0.2982	0.7931	0.625	0.5	0.5	0.6102	0.7083	0.7179	0.3063	0.5769	0.5476	23
DLC1	Candidate gene	0.2119	0.1466	0.7797	0.5051	0.5926	0.5888	0	0	0.6829	0.2155	0.3939	0	0	0.7143	0.7397	0.7755	0.2041	0.6	0.3276	0.8	0.6102	0.5508	0.7034	0.5763	0.7797	0.5254	0.6186	0.5424	0.4746	0.7027	0.3509	0.7544	0.3333	0.1207	0.0446	0.5	0.5	0.6102	0.6806	0.0385	0.5315	0.5769	0.5476	24
PIP4K2A	Candidate gene	0.2203	0.2586	0.3729	0.2424	0.5926	0.5888	0	0	0.6829	0.2069	0.7879	0.7407	0.62	0.7143	0.2603	0.7755	0.3469	0	0	0	0.6102	0.3644	0.2627	0.1186	0.2966	0.5254	0.6186	0.5424	0.4915	0.5946	0.7895	0.5789	0.4035	0.0862	0.1696	0.5	0.5	0.6102	0.75	0.3462	0.7207	0.5769	0.5476	25
ATG5	Candidate gene	0.2288	0.1638	0.6441	0.4747	0.5926	0.5888	0	0	0.6829	0.3621	0.7879	0.7407	0.48	0	0.7397	0.7755	0.2551	0	0.1724	0	0.6102	0.4068	0.3305	0.5763	0.5508	0.5254	0.6186	0.5424	0.4492	0.5135	0.0702	0.3333	0.6491	0.5431	0.1696	0.5	0.5	0.6102	0.7917	0.7436	0.2973	0.5769	0.5476	26
APLP2	Candidate gene	0.2373	0.2069	0.2203	0.5556	0.5926	0.5888	0.1707	0	0.6829	0.2414	0	0	0	0	0	0	0.8061	0	0.6379	0.2571	0.1949	0.322	0.2966	0.1356	0.2797	0.5254	0.2034	0.5424	0.4068	0.3243	0.7719	0.2982	0.9649	0.7931	0.1696	0.5	0.5	0.6102	0.4167	0.0641	0.3964	0.1058	0.5476	27
ITCH	Candidate gene	0.2458	0.1552	0.2966	0.596	0.5926	0.5888	0.7805	0	0.6829	0.5259	0.4848	0.7407	0.82	0.2381	0.7397	0.3061	0.8061	0.6	0.4655	0.6	0.0424	0.5169	0.3729	0.5763	0.4492	0.5254	0.6186	0.5424	0.5932	0.9459	0.4561	0.614	0.7193	0.1034	0.625	0.5	0.5	0.6102	0.6111	0.0385	0.0631	0.5769	0.5476	28
FGF12	Candidate gene	0.2542	0.1121	0.8051	0.5657	0.5926	0.5888	0.8415	0	0.6829	0.4397	0	0.7407	0.42	0	0.7397	0.7755	0.449	0	0.7414	0	0.6102	0.4322	0.7034	0.5763	0.7797	0.5254	0.6186	0.5424	0.4492	0.4324	0.2807	0.4211	0.2632	0.5862	0.625	0.5	0.5	0.6102	0.3472	0.6154	0.018	0.5769	0.5476	29
PARD3	Candidate gene	0.2627	0.2759	0.7797	0.2626	0.5926	0.5888	0.8415	0	0	0.25	0.3939	0	0.82	0.7143	0.7397	0.3265	0.3061	0	0.4483	0	0.161	0.5254	0.2797	0.1441	0.3644	0.5254	0.1949	0.5424	0.5508	0.4865	0.4386	0.7368	0.4561	0.7931	0.625	0.5	0.5	0.1864	0.2222	0.6667	0.1622	0.5769	0.5476	30
DLGAP4	Candidate gene	0.2712	0.4052	0.7797	0.6263	0.5926	0.5888	0.6951	0	0	0.4741	0	0	0	0	0	0	0.6122	0	0	0	0.1186	0.4576	0.1864	0.5763	0.2458	0.5254	0.1525	0.5424	0.3051	0	0	0	0	0.7931	0.625	0.5	0.5	0.6102	0.3056	0.141	0.6847	0.5769	0.0595	31
OPCML	Candidate gene	0.2797	0.2845	0.339	0.202	0.5926	0.5888	0.1707	0	0	0.681	0	0	0	0	0	0	0.449	0.6	0	0	0.6102	0.8729	0.7034	0.5763	0.7797	0.5254	0.6186	0.5424	0.8814	0.2432	0.0175	0.3158	0.0526	0.4052	0.625	0	0.5	0.6102	0.5	0.2308	0.1351	0.5769	0.5476	32
CACNA2D1	Candidate gene	0.2881	0.6293	0.2203	0.5152	0.5926	0.5888	0.6951	0.1304	0.2195	0.1379	0	0.3333	0.42	0	0.4521	0.7755	0.1837	0	0.7414	0	0.6102	0.8729	0.1525	0.5763	0.7797	0.5254	0.6186	0.5424	0.8814	0.7297	0.3684	0.6491	0.4912	0.1897	0.625	0.5	0.5	0.2034	0.5417	0.0641	0.2883	0.5769	0.5476	33
PPP1R9A	Candidate gene	0.2966	0.2672	0.6441	0.1313	0.5926	0.5888	0.8415	0	0	0.4828	0	0	0	0	0	0	0.2653	0	0.7414	0	0.6102	0.339	0.2627	0.5763	0.3898	0.5254	0.6186	0.5424	0.5339	0	0.1579	1	0.1754	0.2414	0.625	0.5	0.5	0.6102	0.3333	0.6667	0.2523	0.5769	0.5476	34
ST14	Candidate gene	0.3051	0.5776	0.0932	0.6162	0.5926	0.5888	0.5	0.7391	0.6829	0.3707	0	0	0	0	0	0	0.8061	0.6	0.2414	0.4857	0.6102	0.3898	0.7034	0.5763	0.4407	0.5254	0.6186	0.5424	0.5169	0.8649	0.8421	0.6842	0.807	0.0776	0.625	0.5	0.5	0.6102	0.375	0.5	0.1892	0.5769	0.5476	35
NXN	Candidate gene	0.3136	0.25	0.6441	0.8283	0.5926	0.5888	0	0	0.6829	0.2586	0	0.3333	0	0	0.7397	0	0.8061	0	0.569	0	0.6102	0.3136	0.339	0.5763	0.3305	0.5254	0.6186	0.5424	0.3305	0	0.6842	0.8772	0.2807	0.7931	0.625	0.5	0.5	0.2203	0.5972	0.4103	0.3694	0.5769	0.0238	36
INVS	Candidate gene	0.322	0.2241	0.8136	0.8081	0.5926	0.5888	0.6951	0	0	0.6897	0	0	0	0	0	0	0.8061	0.6	0.2931	0.8	0.6102	0.4915	0.2119	0.5763	0.2288	0.5254	0.6186	0.5424	0.3136	0.8378	0.4035	0.7895	0.7544	0.7931	0.625	0.5	0.5	0.6102	0.0556	0.141	0.2072	0.5769	0.5476	37
STX12	Candidate gene	0.3305	0.3707	0.4831	0.6869	0.5926	0.5888	0.5	0	0	0.7759	0.4545	0	0	0	0.7397	0	0	0	0	0	0.6102	0.4492	0.2288	0.5763	0.4153	0.5254	0.178	0.5424	0.4492	0.4054	0.5614	0.4035	0.6842	0.7931	0.1696	0.5	0	0.6102	0.8889	0.7436	0.1261	0.5769	0.5476	38
NFRKB	Candidate gene	0.339	0.5431	0.6441	0.2121	0.5926	0.5888	0.939	0	0	0.5172	0	0	0	0	0	0	0.5816	0	0	0	0.6102	0.678	0.7034	0.5763	0.5424	0.5254	0.6186	0.5424	0.678	0.4595	0.2281	0.7719	0.7018	0.181	0.625	0.5	0.5	0.6102	0	0.7436	0.5225	0.5769	0.5476	39
FABP7	Candidate gene	0.3475	0.3017	0.3559	0.4949	0.5926	0.5888	0	0.7391	0.6829	0.1983	0	0	0	0	0.7397	0	0.449	0	0.6034	0	0.2034	0.8729	0.7034	0.5763	0.7797	0.5254	0.6186	0.5424	0.8814	0.6486	0.7368	0.0702	0.1579	0.4397	0.625	0.5	0.5	0.6102	0.6944	0.5769	0.1171	0.5769	0.5476	40
ABCG2	Candidate gene	0.3559	0.569	0.2203	0.2727	0.5926	0.5888	0.5	0.4348	0.6829	0.0603	0.7879	0.3333	0.98	0.7143	0.4384	0.4694	0.1122	0.6	0.4138	0.2286	0.1271	0.339	0.7034	0.5763	0.2966	0.5254	0.6186	0.5424	0.3305	0.7568	0.6667	0.9825	0.5088	0.2328	0.625	0.5	0.5	0.6102	0.3611	0.141	0.973	0.5769	0.5476	41
PEX1	Candidate gene	0.3644	0.6034	0.8475	0.6667	0.5926	0.5888	0.6951	0	0.6829	0.5086	0	0	0	0	0.7397	0	0.8061	0.6	0	0.3714	0.6102	0.4153	0.322	0.5763	0.2966	0.5254	0.6186	0.5424	0.4237	0.5405	0.5965	0.5439	0.7895	0.2672	0.625	0.5	0.5	0.1949	0.1389	0.9103	0.1712	0.5769	0.5476	42
TTYH1	Candidate gene	0.3729	0.6466	0.2203	0.9899	0.5926	0.5888	0.3659	0	0	0.5776	0.7879	0	0	0	0.7397	0	0	0	0.6724	0	0.6102	0.2373	0.1695	0.5763	0.1864	0.5254	0.6186	0.5424	0.2288	0	0.5088	0.2807	0.0877	0.3621	0.625	0.5	0.5	0.6102	0.4028	0.8718	0.2703	0.5769	0.5476	43
PIGU	Candidate gene	0.3814	0.8362	0.1525	0	0.5926	0.5888	0.1707	0	0	0.7845	0.7879	0	0.62	0.7143	0.7397	0.7755	0.8061	0	0	0	0.6102	0.4322	0.3475	0.5763	0.322	0.5254	0.6186	0.5424	0.4746	0	0	0	0	0.7931	0.625	0.5	0.5	0.6102	0.7222	0.5641	0.5766	0.5769	0.5476	44
PLXDC2	Candidate gene	0.3898	0.7069	0.2203	0.2323	0.5926	0.5888	0.1707	0	0.6829	0.3879	0	0	0	0	0	0	0.2245	0	0	0	0.6102	0.339	0.7034	0.5763	0.2966	0.5254	0.6186	0.5424	0.3305	0	0	0	0	0.7931	0.1696	0.5	0	0.6102	0.9861	0.6667	0.2252	0.5769	0.5476	45
USP28	Candidate gene	0.3983	0.4138	0.6441	0.8182	0.5926	0.5888	0.939	0	0	0.8448	0	0	0	0	0	0	0	0	0	0	0.6102	0.5593	0.3559	0.5763	0.4322	0.5254	0.6186	0.5424	0.5763	0	0	0	0	0.2586	0.625	0.5	0.5	0.6102	0.5278	0.4103	0.1532	0.5769	0.5476	46
TSPAN9	Candidate gene	0.4068	0.8103	0.322	0.3939	0.5926	0.5888	0.1707	0	0	0.8362	0	0	0	0	0	0	0.2755	0	0	0	0.6102	0.1525	0.7034	0.5763	0.1864	0.5254	0.6186	0.5424	0.161	0.8919	0.6316	0.8596	0.5789	0.2241	0.625	0.5	0.5	0.6102	0.6528	0.1923	0.6667	0.5769	0.5476	47
ZMAT4	Candidate gene	0.4153	0.9483	0.6441	0.6364	0.5926	0.5888	0	0	0	0.7931	0	0	0	0	0	0	0.449	0	0	0	0.6102	0.2373	0.7034	0.5763	0.7797	0.5254	0.6186	0.5424	0.2288	0	0.7544	0.5614	0.3158	0.4224	0.625	0.5	0.5	0.6102	0.4306	0.5897	0.1802	0.5769	0.5476	48
NGEF	Candidate gene	0.4237	0.2414	0.7797	0.4545	0.5926	0.5888	0.7805	0	0	0.3966	0.2424	0	0.62	0.7143	0.7397	0.2653	0.449	0	0.4828	0	0.1695	0.8729	0.2881	0.5763	0.7797	0.5254	0.6186	0.5424	0.8814	0	0	0	0	0.4224	0.625	0	0.5	0.6102	0.2917	0.141	0.3604	0	0.5476	49
ZW10	Candidate gene	0.4322	0.6207	0.3729	0.798	0.5926	0.5888	0.939	0	0	0.8534	0.7879	0	0	0	0.7397	0.7755	0.449	0	0	0	0.6102	0.4746	0.7034	0.5763	0.4576	0.5254	0.6186	0.5424	0.5085	0.7838	0.0351	0.5263	0.7368	0.7931	0.625	0.5	0.5	0.6102	0.2361	0.4103	0.1982	0.5769	0.5476	50
PRPF31	Candidate gene	0.4407	0.75	0.6441	0.7475	0.5926	0.5888	0.939	0	0.6829	0.7328	0	0	0.82	0	0.7397	0	0.8061	0.6	0.8448	0.8	0.6102	0.6017	0.3898	0.1271	0.5	0.5254	0.6186	0.5424	0.6356	0.6216	0.5789	0.3684	0.614	0.7931	0.625	0.5	0.5	0.6102	0.2083	0.6282	0.4685	0.5769	0.5476	51
SLC25A27	Candidate gene	0.4492	0.2931	0.4153	0.4343	0.5926	0.5888	0	0	0	0.4052	0	0.7407	0	0	0.7397	0	0.3878	0	0	0.4	0.6102	0.8729	0.1695	0.5763	0.7797	0.5254	0.6186	0.5424	0.8814	0	0	0	0	0.2414	0.625	0	0	0.6102	0.625	0.3077	0.7297	0.5769	0.5476	52
TTYH1	Candidate gene	0.4576	0.6466	0.2203	0.9899	0.5926	0.5888	0	0	0	0.5776	0	0	0	0	0.7397	0	0	0	0.6724	0	0.6102	0.2373	0.7034	0.5763	0.1864	0.5254	0.6186	0.5424	0.2288	0	0	0	0	0.3621	0.625	0	0	0.6102	0	0	0.2703	0.5769	0	53
TTYH1	Candidate gene	0.4661	0.6466	0.2203	0.9899	0.5926	0.5888	0	0	0	0.5776	0	0	0	0	0.7397	0	0	0	0.6724	0	0.6102	0.2373	0.7034	0.5763	0.1864	0.5254	0.6186	0.5424	0.2288	0	0	0	0	0.3621	0.625	0	0	0.6102	0	0	0.2703	0.5769	0	54
BCKDHB	Candidate gene	0.4746	0.5862	0.3559	0.5859	0.5926	0.5888	0.6951	0	0.6829	0.5	0.7879	0.3333	0.62	0	0.7397	0.7755	0.5306	0.6	0	0.4286	0.6102	0.8729	0.7034	0.5763	0.7797	0.5254	0.6186	0.5424	0.8814	0.8108	0.7018	0.807	0.9123	0.7931	0.625	0.5	0.5	0.6102	0.0833	0.0897	0.4054	0.5769	0.5476	55
FANCC	Candidate gene	0.4831	0.3879	0.9322	0.2525	0.5926	0.5888	0	0	0.6829	0.4655	0.7879	0	0	0.7143	0.7397	0.7755	0.5612	0.6	0.5517	0.8	0.6102	0.5085	0.2203	0.5763	0.2712	0.5254	0.161	0.5424	0.3559	0.6757	0.1754	0.8246	0.5263	0.3362	0.625	0.5	0.5	0.6102	0.1806	0.7949	0.9459	0.5769	0.5476	56
PRPF31	Candidate gene	0.4915	0.75	0.6441	0.7475	0.5926	0.5888	0	0	0	0.7328	0	0	0.82	0	0.7397	0	0.8061	0.6	0.8448	0.8	0.6102	0.6017	0.7034	0.5763	0.5	0.5254	0.6186	0.5424	0.6356	0	0	0	0	0.7931	0.625	0	0	0.6102	0	0	0.4685	0.5769	0.5476	57
UNC79	Candidate gene	0.5	0.5259	0.4153	0.4242	0.5926	0.5888	0	0	0	0.9138	0.7879	0	0	0	0.7397	0	0.449	0	0.9483	0	0.6102	0.2373	0.1695	0.5763	0.2373	0.5254	0.6186	0.5424	0.2288	0	0	0	0	0.4224	0.625	0.5	0.5	0.6102	0.8056	0.2179	0	0	0.5476	58
PRPF31	Candidate gene	0.5085	0.75	0.6441	0.7475	0.5926	0.5888	0	0	0	0.7328	0	0	0.82	0	0.7397	0	0.8061	0.6	0.8448	0.8	0.6102	0.6017	0.7034	0.5763	0.5	0.5254	0.6186	0.5424	0.6356	0	0	0	0	0.7931	0.625	0	0	0.6102	0	0	0.4685	0.5769	0	59
NDUFA3	Candidate gene	0.5678	0.8793	0.4831	0.3434	0.5926	0.5888	0.5	0.7391	0	0.3103	0	0.7407	0.28	0	0.3562	0.7755	0.8061	0	0	0	0.6102	0.2373	0.7034	0.5763	0.7797	0.5254	0.6186	0.5424	0.2288	0	0	0	0	0.7931	0.1696	0	0	0.6102	0	0	0.8468	0.5769	0.5476	66
HERC5	Candidate gene	0.5763	0.3103	0.9322	0.6566	0.5926	0.5888	0.6951	0	0	0.2672	0.7879	0	0	0	0.7397	0	0.2347	0	0	0	0.6102	0.5424	0.3644	0.5763	0.3729	0.5254	0.6186	0.5424	0.5424	0	0.807	0.9298	0.5439	0.3362	0.625	0.5	0.5	0.6102	0.875	0.5385	0.3784	0.5769	0.5476	67
RAB38	Candidate gene	0.5847	0.4224	0.8475	0.8384	0.5926	0.5888	0	0	0	0.4569	0	0	0	0.7143	0.7397	0	0.3571	0	0.6207	0.5429	0.6102	0.1525	0.7034	0.5763	0.3475	0.5254	0.6186	0.5424	0.4153	0	0.9298	0.0526	0.7719	0.1379	0.625	0.5	0.5	0.6102	0.4722	0.9615	0.4234	0.5769	0.5476	68
NDUFA3	Candidate gene	0.5932	0.8793	0.4831	0.3434	0.5926	0.5888	0.5	0.7391	0	0.3103	0	0.7407	0.28	0	0.3562	0.7755	0.8061	0	0	0	0.6102	0.2373	0.7034	0.5763	0.7797	0.5254	0.6186	0.5424	0.2288	0	0	0	0	0.7931	0.1696	0	0	0.6102	0	0	0.8468	0.5769	0	69
THADA	Candidate gene	0.6525	0	0.6441	0.2828	0.5926	0.5888	0.939	0	0	0.8879	0	0	0	0	0	0	0.3367	0	0	0	0.6102	0.5339	0.7034	0.5763	0.1864	0.5254	0.6186	0.5424	0.5678	0	0.7193	0.4737	0.4386	0.7931	0.625	0.5	0.5	0.6102	0.5139	0.8205	0.9099	0.5769	0.5476	76
AK8	Candidate gene	0.661	0.3448	0.6441	0	0.5926	0.5888	0	0.7391	0.6829	0.8017	0	0	0	0	0	0	0.8061	0	0.7069	0	0.6102	0.8729	0.7034	0.5763	0.7797	0.5254	0.6186	0.5424	0.8814	0	0	0	0	0.2155	0.625	0	0.5	0.6102	0.6389	0.7949	0	0	0.5476	77
EPHA6	Candidate gene	0.6695	0.431	0.2203	0.4646	0.5926	0.5888	0.1707	0	0.6829	0.8966	0	0	0.62	0	0.7397	0.2653	0.2959	0	1	0	0.6102	0.2373	0.7034	0.5763	0.7797	0.5254	0.6186	0.5424	0.3814	0	0	0	0	0.7931	0.625	0.5	0	0.6102	0.5833	0.9231	0.3243	0.5769	0.5476	78
CYP39A1	Candidate gene	0.678	0.5172	0.8475	0.2929	0.1759	0.5888	0.1707	0	0.6829	0.4138	0.5455	0.4444	0.62	0.7143	0.7397	0.7755	0	0	0	0	0.2119	0.8729	0.7034	0.5763	0.7797	0.5254	0.6186	0.5424	0.8814	0	0.8947	0.4386	0.9474	0.7931	0.625	0.5	0.5	0.1695	0.7361	0.2692	0.3874	0.5769	0.5476	79
MANBAL	Candidate gene	0.6864	0.8103	0.4831	0	0.5926	0.5888	0.5	0	0	0.8276	0	0	0	0	0	0	0	0	0	0	0.6102	0.3898	0.7034	0.5763	0.7797	0.5254	0.6186	0.5424	0.3814	0	0	0	0	0.7931	0.1696	0	0	0.6102	1	0.5897	0.5676	0.5769	0.5476	80
LENG8	Candidate gene	0.6949	0.6638	0.6441	0	0.5926	0.5888	0	0	0	0.8103	0	0	0	0	0	0	0	0	0	0	0.6102	0.8729	0.3136	0.5763	0.7797	0.5254	0.6186	0.5424	0.8814	0	0	0	0	0.7931	0.625	0	0.5	0.6102	0.5556	0.8462	0.6847	0.5769	0.5476	81
CERS4	Candidate gene	0.7034	0.6983	0.4831	0.4848	0.5926	0.5888	0.3659	0	0.6829	0.431	0.7879	0	0	0	0.7397	0.7755	0.5714	0	0	0	0.6102	0.8729	0.7034	0.5763	0.7797	0.5254	0.6186	0.5424	0.8814	0	0.8772	0.5965	0.9298	0.7931	0.625	0.5	0.5	0.6102	0.8472	0.5	0	0	0.5476	82
INF2	Candidate gene	0.7119	0.6034	0.2881	0.697	0.5926	0.5888	0.939	0	0	0.9483	0	0	0	0	0	0	0	0.6	0	0.4857	0.6102	0.3644	0.7034	0.5763	0.2203	0.5254	0.6186	0.5424	0.3814	0	0.3333	0.9649	0.8596	0.7931	0.625	0.5	0.5	0.6102	0	0	0	0.5769	0.5476	83
VWC2	Candidate gene	0.7203	0.1897	0.9322	0	0.5926	0.5888	0.6951	0	0	0.5345	0	0	0	0	0	0	0	0	0	0	0.6102	0.8729	0.7034	0.5763	0.7797	0.5254	0.6186	0.5424	0.8814	0	0	0	0	0.1983	0	0.5	0.5	0.6102	0	0.5513	0.7027	0.5769	0.5476	84
ZIC4	Candidate gene	0.7288	0.9483	0.6441	0.8586	0.5926	0.5888	0.6951	0	0	0.3793	0	0	0	0	0	0	0	0	0.5862	0	0.2203	0.8729	0.7034	0.5763	0.7797	0.5254	0.6186	0.5424	0.8814	0	0.4737	0.2456	0.4737	0.4483	0.625	0.5	0	0.6102	0.9028	0.141	0.5405	0.5769	0.5476	85
TMPRSS5	Candidate gene	0.7373	0.8103	0.0932	0.8485	0.5926	0.5888	0.5	0	0	0.9569	0	0	0	0	0	0	0.449	0	0	0	0.6102	0.8729	0.7034	0.5763	0.7797	0.5254	0.6186	0.5424	0.8814	0	0.2456	0.2632	0.5965	0.3793	0.625	0.5	0.5	0.6102	0.1667	0.141	0.9009	0	0.5476	86
METTL16	Candidate gene	0.7458	1	0.6441	0.5253	0.5926	0.5888	0	0	0.6829	0.6724	0	0	0	0	0	0	0.3163	0	0	0	0.6102	0.3898	0.7034	0.5763	0.7797	0.5254	0.6186	0.5424	0.4237	0	0.8596	0.8421	0.8947	0.1983	0.1696	0.5	0.5	0.6102	0.2778	0.4103	0	0	0.5476	87
LENG8	Candidate gene	0.7542	0.6638	0.6441	0	0.5926	0.5888	0	0	0	0.8103	0	0	0	0	0	0	0	0	0	0	0.6102	0.8729	0.7034	0.5763	0.7797	0.5254	0.6186	0.5424	0.8814	0	0	0	0	0.7931	0.625	0	0	0.6102	0	0	0.6847	0.5769	0.5476	88
LENG9	Candidate gene	0.7627	0.9741	0.9322	0	0.5926	0.5888	0.6951	0	0	0.9224	0	0	0	0	0	0	0	0	0	0	0.6102	0.2373	0.7034	0.5763	0.1864	0.5254	0.6186	0.5424	0.2288	0	0	0	0	0.2931	0	0	0.5	0.6102	0.4444	0.9487	0.0721	0.5769	0.5476	89
COL28A1	Candidate gene	0.7712	0.5345	0.6441	0	0.5926	0.5888	0.6951	0	0	0.9052	0.7879	0	0	0	0.7397	0	0.449	0	0	0	0.6102	0.8729	0.7034	0.5763	0.7797	0.5254	0.6186	0.5424	0.8814	0	0	0	0	0.7931	0.625	0	0	0.178	0	0	0.5495	0	0.5476	90
PRDM10	Candidate gene	0.7797	0.681	0.6441	0.5455	0.5926	0.5888	0.8415	0	0	0.8621	0	0	0	0	0	0	0.449	0	0	0	0.6102	0.339	0.7034	0.5763	0.7797	0.5254	0.6186	0.5424	0.3305	0	0.2105	0.9123	0.8246	0.7931	0.625	0.5	0.5	0.6102	0.9722	0.6667	0.3423	0.5769	0.5476	91
LENG9	Candidate gene	0.7881	0.9741	0.9322	0	0	0	0	0	0	0.9224	0	0	0	0	0	0	0	0	0	0	0.6102	0.2373	0.7034	0.5763	0.1864	0.5254	0.6186	0.5424	0.2288	0	0	0	0	0.2931	0	0	0	0.6102	0	0	0.0721	0.5769	0.5476	92
ZBTB44	Candidate gene	0.7966	0.681	0.6441	0	0.5926	0.5888	0	0	0	0.4483	0	0	0	0	0	0	0	0	0	0	0.6102	0.8729	0.7034	0.5763	0.7797	0.5254	0.6186	0.5424	0.8814	0	0.5263	0.9474	0.6316	0.7931	0.0446	0.5	0.5	0.6102	0	0.7436	0.9279	0.5769	0.5476	93
DYNC1I2	Candidate gene	0.8051	0.5948	0.3898	0.9697	0.5926	0.5888	0.939	0	0.6829	0.8793	0.7879	0	0.62	0.7143	0.7397	0.7755	0.8061	0	0.9655	0	0.6102	0.7288	0.3051	0.5763	0.4068	0.5254	0.6186	0.5424	0.5847	0	0	0	0	0.5431	0.625	0	0.5	0.6102	0.4861	0.5256	0.5135	0.5769	0.5476	94
ABCA13	Candidate gene	0.8136	0.931	0.4153	0	0.5926	0.5888	0.1707	0	0	0.8707	0	0	0	0	0.7397	0	0.5204	0	0	0	0.1525	0.8729	0.7034	0.5763	0.7797	0.5254	0.6186	0.5424	0.8814	0	0	0	0	0.7931	0.625	0.5	0	0.2119	0.6667	0.3205	0.8919	0.5769	0.5476	95
ANKFN1	Candidate gene	0.822	0	0.9322	0	0.5926	0.5888	0.6951	0	0	0.9828	0	0	0	0	0	0	0.5918	0	0	0	0.6102	0.8729	0.7034	0.5763	0.7797	0.5254	0.6186	0.5424	0.8814	0	0	0	0	0.4483	0.625	0.5	0.5	0.6102	0.4583	0.4103	0.2342	0.5769	0.5476	96
TFPT	Candidate gene	0.8305	0.4741	0.9322	0.9192	0	0	0	0	0	0.6293	0	0	0	0	0	0	0.8061	0	0	0	0.6102	0.678	0.7034	0.5763	0.7797	0.5254	0.6186	0.5424	0.7203	0	0	0	0	0.5	0.625	0	0	0.6102	0	0	0.6216	0.5769	0.5476	97
KIAA1324L	Candidate gene	0.839	0.8103	0.2203	0	0.5926	0	0.1707	0	0	0.9655	0	0	0	0	0	0	0.602	0	0	0	0.6102	0.8729	0.7034	0.5763	0.7797	0.5254	0.6186	0.5424	0.8814	0	0	0	0	0.1724	0.625	0	0.5	0.6102	0.9167	0.2949	0.2342	0.5769	0.5476	98
HERC6	Candidate gene	0.8475	0.9224	0.6441	0.8687	0.5926	0.5888	0.8415	0	0	0.5517	0	0	0	0	0	0	0	0	0	0	0.6102	0.4576	0.7034	0.5763	0.3475	0.5254	0.6186	0.5424	0.4915	0	0.5439	0.8947	0.6667	0.0948	0.625	0.5	0.5	0.6102	0.9583	0.8846	0.9369	0.5769	0.5476	99
TFPT	Candidate gene	0.8559	0.4741	0.9322	0.9192	0	0	0	0	0	0.6293	0	0	0	0	0	0	0.8061	0	0	0	0.6102	0.678	0.7034	0.5763	0.7797	0.5254	0.6186	0.5424	0.7203	0	0	0	0	0.5	0.625	0	0	0.6102	0	0	0.6216	0.5769	0	100
CD320	Candidate gene	0.9153	0.5517	0.1186	0.6465	0.5926	0.5888	0.1707	0	0.6829	0.4914	0	0	0	0	0	0	0.8061	0.6	0.931	0.8	0.6102	0.4153	0.7034	0.5763	0.2627	0.5254	0.6186	0.5424	0.3814	0	0.9474	0.7193	0.5614	0.7931	0.625	0.5	0.5	0.6102	0.9306	0.8974	0.991	0.5769	0.5476	107
PKD1L1	Candidate gene	0.9237	0.3966	0.2203	0	0.5926	0.5888	0.5	0	0	1	0	0	0	0	0	0	0.3776	0	0.3966	0	0.6102	0.8729	0.7034	0.5763	0.7797	0.5254	0.6186	0.5424	0.8814	0	0	0	0	0.2931	0.625	0.5	0.5	0.6102	0.9444	0.641	0.964	0.5769	0.5476	108
NDUFA3	Candidate gene	0.9322	0.8793	0.4831	0.3434	0.5926	0.5888	0.5	0.7391	0.6829	0.3103	0.7879	0.7407	0.28	0	0.3562	0.7755	0.8061	0	0	0	0.6102	0.2373	0.7034	0.5763	0.7797	0.5254	0.6186	0.5424	0.2288	0	0.9123	0.7018	1	0.7931	0.1696	0.5	0.5	0.6102	0.8194	0.9744	0.8468	0.5769	0	109
AASDH	Candidate gene	0.9407	0.9741	0.6441	0	0.5926	0.5888	0	0	0.6829	0.5603	0	0	0	0	0	0	0	0	0	0	0.6102	0.8729	0.7034	0.5763	0.7797	0.5254	0.6186	0.5424	0.8814	0	0	0	0	0.7931	0.1696	0.5	0.5	0.6102	0.7778	0.7949	0.9459	0.5769	0.5476	110
OR4P4	Candidate gene	0.9492	0.3793	0.322	0	0.5926	0.5888	0.3659	0	0	0	0.2424	0	0	0	0	0.7755	0	0	0	0	0.6102	0.8729	0.7034	0.5763	0.7797	0.5254	0.6186	0.5424	0.8814	0	0	0	0	0	0	0	0	0.6102	0.8611	1	0.7117	0	0	111
ANKK1	Candidate gene	0.9576	0.9741	0.9322	0	0.5926	0.5888	0	0	0.0976	0.9741	0	0	0	0	0	0	0.2449	0.6	0	0	0.1441	0.8729	0.7034	0.5763	0.7797	0.5254	0.6186	0.5424	0.8814	0	0	0	0	0.7931	0.625	0.5	0	0.6102	0.2639	0.5	0.982	0.5769	0.5476	112
ZNF804B	Candidate gene	0.9661	0.9483	0.9322	0	0.5926	0.5888	0.8415	0	0	0	0.7879	0	0	0	0	0	0.3265	0	0	0	0.6102	0.8729	0.7034	0.5763	0.7797	0.5254	0.6186	0.5424	0.8814	0	0	0	0	0.7931	0	0.5	0	0.6102	0.25	0.859	0.9099	0	0	113
CLDN25	Candidate gene	0.9746	0.8103	0.4831	0	0.5926	0.5888	0.1707	0	0	0.9914	0	0	0	0	0.7397	0	0	0	0	0	0.6102	0.8729	0.7034	0.5763	0.7797	0.5254	0.6186	0.5424	0.8814	0	0	0	0	0	0	0	0	0.6102	0	0	0	0	0	114
TFPT	Candidate gene	0.9831	0.4741	0.9322	0.9192	0	0	0.939	0	0	0.6293	0	0	0	0	0	0	0.8061	0	0	0	0.6102	0.678	0.3814	0.5763	0.7797	0.5254	0.6186	0.5424	0.7203	0	0.614	0.5088	0.9825	0.5	0.625	0.5	0	0.6102	0	0.9872	0.6216	0.5769	0.5476	115
PRM1	Candidate gene	0.9915	0.3621	0.3559	0.6061	0.5926	0.5888	0.8415	0	0	0.5431	0	0	0	0	0	0	0.3571	0	0	0	0.6102	0.8729	0.7034	0.5763	0.7797	0.5254	0.6186	0.5424	0.8814	0.973	1	0.4561	0.8421	0.7931	0.625	0.5	0.5	0.6102	0	0.8333	1	0	0.5476	116
ZPBP	Candidate gene	1	0.3534	0.3051	0.6768	0.5926	0.5888	0.1707	0	0	0.9397	0	0	0	0	0	0	0	0	0.9828	0	0.6102	0.8729	0.7034	0.5763	0.7797	0.5254	0.6186	0.5424	0.8814	1	0.9649	0.1579	0.8772	0.7931	0.625	0.5	0.5	0.6102	0.7639	0.2692	0.2162	0	0.5476	117
