# Supplementary material for: Genome-Wide Signatures of Selection Reveal Genes Associated With Performance in American Quarter Horse Subpopulations
Source: Front Genet. 2018 Jul 19;9:249. doi: 10.3389/fgene.2018.00249 (PMC6060370; doi:10.3389/fgene.2018.00249)
Supplement: Supplementary Table 7 — Genes identified by Endeavor using the metabolism seed gene list in all 6 QH subpopulations ranked by p-value. Each column on the table corresponds to a human-based data source used by Endeavor-GW to rank the provided list of genes based on the seed genes. These are: gene and protein function, chemical information, biomolecular pathways, phenotypic information, interaction networks, expression profiles, expression ontologies, and sequence-based features. [file Table_7.XLSX]

## Sheet: Cutting_Metabolism
Gene name	Group	P-value	Annotation â€“ Gene Ontology	Annotation â€“ UniProt	Text-mining	Annotation â€“ InterPro	Annotation â€“ Pfam	Annotation â€“ SIMAP (localization)	Annotation â€“ DrugBank	Annotation â€“ Stitch	Annotation â€“ RGD ChEBI	Annotation â€“ Reactome	Annotation â€“ WikiPathways	Annotation â€“ RGD pathways	Annotation â€“ BioCarta	Annotation â€“ CPDB	Annotation â€“ hiPathDB	Annotation â€“ GAD	Annotation â€“ OMIM	Annotation â€“ RGD MP	Annotation â€“ RGD RDO	Interaction â€“ String	Interaction â€“ BioGrid	Interaction â€“ I2D	Interaction â€“ IntAct	Interaction â€“ iRefIndex	Interaction â€“ Mint	Interaction â€“ HPRD	Interaction â€“ MIPS	Interaction â€“ GeneRIF	Expression â€“ Su et al (2002)	Expression â€“ Su et al (2004)	Expression â€“ CMAP	Expression â€“ Lukk et al	Annotation â€“ PaGenBase	Annotation â€“ CGAP	Annotation â€“ GNF	Annotation â€“ eGenetics	Blast	Precalculated â€“ Ouzounis	Precalculated â€“ Prospectr	Precalculated â€“ HaploPred	Annotation â€“ Aura	Annotation â€“ mirZ	id
APOA2	Training gene	0.0074	0.0081	0.0222	0.0099	0.048	0.0333	0.1856	0	0.0147	0.0077	0.0192	0.0857	0.025	0.0263	0.0405	0.0204	0.0538	0.1714	0.0299	0.0233	0.0222	0.0444	0.037	0.037	0.0444	0.0296	0.037	0.5407	0.0444	0	0.0361	0.0241	0.0361	0.0075	0.0149	0.0342	0	0.0815	0.0357	0.0236	0.136	0	0.5	0
APOE	Training gene	0.0148	0.0161	0.0074	0.0198	0.008	0.0083	0.4021	0.2222	0.0441	0.0154	0.0577	0.0286	0.075	0.0789	0.0135	0.0816	0.0323	0.0286	0.0448	0.0698	0.0222	0.0444	0.037	0.037	0.0444	0.0296	0.037	0.0148	0.0444	0.0182	0.0241	0.0843	0.0241	0.0224	0.0299	0.0256	0.5093	0.037	0.0982	0.8031	0.552	0.5285	0.5	1
INSR	Training gene	0.0222	0.0484	0.0593	0.0594	0.072	0.0583	0.1856	0.0556	0.1029	0.1	0.2308	0.1143	0.975	0.1053	0.1216	0.102	0.043	0.0857	0.1045	0.1628	0.0889	0.0444	0.037	0.037	0.0444	0.0296	0.037	0.0148	0.0444	0.0909	0.1928	0.2892	0.0482	0.1642	0.0746	0.2051	0.5093	0.037	0.0179	0.0866	0.008	0.0081	0.5	2
PPARA	Training gene	0.0296	0.0323	0.3185	0.0495	0.056	0.0917	0	0.1111	0.0588	0.0385	0.0962	0.1714	0.6	0.1316	0.0946	0.0612	0.0215	0.2857	0.0149	0.0465	0.0074	0.0444	0.037	0.037	0.0444	0.0296	0.037	0.5407	0.0444	0.0545	0.0843	0.1807	0.0964	0.5821	0.1418	0.1795	0.0093	0.037	0	0.0472	0.448	0.0163	0.5	3
APOA5	Training gene	0.037	0.0242	0.0148	0	0.008	0.0083	0.4021	0	0.0294	0.1385	0.0385	0.0571	0.025	0.0263	0.027	0.0408	0.0108	0.1429	0.0597	0.093	0.0074	0.0444	0.7556	0.037	0.0444	0.5407	0.6	0.0148	0.0444	0	0	0	0	0.0373	0.0746	0.0085	0.5093	0.037	0.5268	0.2677	0.568	0	0.5	4
TF	Training gene	0.0444	0.2581	0.0889	0.0792	0.04	0.075	0.1856	0.1667	0.1765	0.0538	0.5385	0.1429	0.925	0.1842	0.1081	0.2653	0.0968	0.3143	0.209	0.1395	0.0667	0.0444	0.037	0.037	0.0444	0.0296	0.037	0.5407	0.0444	0.0364	0.012	0.012	0.012	0.0149	0.0522	0.0171	0.5093	0.037	0.1161	0.0866	0.152	0.5285	0.5	5
BDNF	Training gene	0.0519	0.0565	0.0296	0.0396	0.024	0.0667	0.1856	0	0.0735	0.0692	0	0.2	0.85	0.2105	0.1622	0.1429	0.0753	0.0571	0.1493	0.2558	0.1111	0.0444	0.037	0.037	0.0444	0.0296	0.037	0.5407	0.0444	0.0727	0.1205	0.1566	0.1084	0.1567	0.5821	0.1795	0.5093	0.037	0.0268	0.5276	0.048	0.5285	0.5	6
ZFHX3	Training gene	0.0593	0.1774	0.3852	0.0297	0.192	0.0833	0.7423	0	0.2353	0.1692	0	0	0	0.1579	0.2027	0.1837	0.1613	0.2571	0.2985	0.7209	0.637	0.0444	0.037	0.037	0.0444	0.0296	0.037	0.5407	0.0444	0	0	0	0	0.0896	0.1119	0.0427	0.5093	0.037	0.2321	0.0472	0.096	0.0244	0.5	7
NLRP3	Training gene	0.0667	0.0645	0.0444	0	0.064	0.0417	0.0103	0	0.0882	0.2231	0.2115	0.3429	0.9	0	0.2162	0.2857	0.1398	0.1143	0.0896	0.5116	0.637	0.0444	0.037	0.037	0.0444	0.5407	0.037	0.5407	0.0444	0.1273	0.4096	0.0602	0.0602	0.1194	0.5821	0.6068	0.5093	0.037	0.1964	0.5512	0.384	0.5285	0.5	8
GHRL	Training gene	0.0741	0.0403	0.037	0.0891	0.032	0.025	0.1856	0	0.1912	0.0231	0.1731	0	0.675	0	0.1892	0.2449	0.0645	0.2286	0.4478	0.1163	0.1185	0.0444	0.037	0.6222	0.0444	0.5407	0.037	0.5407	0.0444	0	0	0	0	0.5821	0.5821	0	0.5093	0.0741	0.0536	0.5197	0.928	0.5285	0.5	9
PLAGL1	Training gene	0.0815	0.2419	0.4815	0.0693	0.176	0.1083	0	0	0	0.0615	0	0	0	0	0	0	0.2151	0.2	0.403	0	0.637	0.0444	0.037	0.6222	0.0444	0.0296	0.037	0.5407	0.0444	0.1091	0.1566	0.0964	0.0843	0.1269	0.5821	0.6068	0.5093	0.037	0.1786	0.5512	0.728	0.5285	0.5	10
ERBB3	Candidate gene	0.0889	0.0968	0.0815	0.1881	0.08	0.05	0.1856	0	0.2059	0.2154	0.3654	0.6857	0.475	0.6053	0.6216	0.6531	0.2258	0.6571	0.2687	0.5349	0.1556	0.4296	0.2	0.6222	0.2519	0.0741	0.1333	0.5407	0.3481	0.3273	0.3133	0.6747	0.1566	0.5821	0.5821	0.6068	0.5093	0.0963	0.0625	0.0866	0.016	0.5285	0.5	11
NR1H4	Candidate gene	0.0963	0.0887	0.3185	0.1386	0.12	0.0917	0.7423	0.6111	0.75	0.2846	0.5192	0.2286	0.25	0.6053	0.6216	0.3061	0.129	0	0.2239	0.3256	0.0519	0.3556	0.2296	0.0741	0.2444	0.5407	0.0815	0.5407	0.4222	0.7818	0.3855	0.4337	0.0723	0.0299	0.5821	0.1282	0.5093	0.0889	0.25	0.1417	0.224	0.5285	0.5	12
SLC25A12	Candidate gene	0.1037	0.371	0.437	0.3267	0.6	0.5667	0	0.6111	0.75	0.3769	0.2885	0	0	0	0.6216	0.6531	0.5161	0.6571	0.4179	0.4186	0.637	0.3704	0.2296	0.1333	0.3333	0.5407	0.6	0.5407	0.3481	0.2909	0.241	0.5904	0.8795	0.5821	0.5821	0.6068	0.5093	0.2444	0.125	0.1811	0.512	0.5285	0.5	13
PIK3CD	Candidate gene	0.1111	0.1371	0.4667	0.1683	0.096	0.5667	0	0.6111	0.1618	0.4846	0.1923	0.2571	1	0	0.0541	0.1224	0.8602	0	0.8507	0.9302	0.0741	0.3852	0.1333	0.6222	0.2148	0.5407	0.1185	0.5407	0.2741	0.6182	0.8072	0.8554	0.1446	0.1418	0.1418	0.6068	0.5093	0.1926	0.3929	0.1417	0.128	0.5285	0.5	14
DLAT	Candidate gene	0.1185	0.4274	0.2444	0.4059	0.6	0.5667	0.5258	0.6111	0.4118	0.3462	0.2885	0.6857	0.8	0	0.6216	0.6531	0.9032	0.6571	0	0.4419	0.637	0.5704	0.3333	0.0963	0.5185	0.5407	0.6	0.5407	0.5778	0.4	0.6988	0.1325	0.5783	0.5821	0.5821	0.1453	0.5093	0.6444	0.2946	0.2126	0.08	0.5285	0.5	15
PDHX	Candidate gene	0.1259	0.4113	0.2444	0.6139	0.6	0.5667	0.5258	0	0.4118	0.5769	0.2885	0.6857	0.7	0.6053	0.6216	0.6531	0.1505	0.6571	0	0	0.1407	0.5926	0.2815	0.6222	0.2963	0.5407	0.1407	0.5407	0.5037	0.3455	0.4337	0.2048	0.7831	0.5821	0.5821	0.6068	0.5093	0.6444	0.0446	0.4252	0.968	0.5285	0.5	16
NFE2L2	Candidate gene	0.1333	0.1532	0.3185	0.1485	0.6	0.5667	0.7423	0	0.75	0.0923	0	0.6857	0.25	0.6053	0.6216	0.6531	0.1935	0	0.2388	0.3023	0.1704	0.363	0.163	0.6222	0.2889	0.5407	0.1778	0.5407	0.437	0.4545	0.4699	0.3855	0.9639	0.5821	0.5821	0.6068	0	0.6444	0.3036	0.5512	0.184	0.5285	0.5	17
GAD1	Candidate gene	0.1407	0.4194	0.1111	0.1089	0.6	0.5667	0.1856	0.6111	0.1471	0.0769	0.7692	0.6857	0.6	0	0.6216	0.6531	0.3011	0.6571	0.2836	0.8372	0.0815	0.8444	0.1926	0.1926	0.5333	0.5407	0.6	0.5407	0.8444	0.6364	0.6627	0.506	0.4819	0.5821	0.5821	0.6068	0.5093	0.2741	0.3214	0.2283	0.032	0.5285	0.5	18
ZNF292	Candidate gene	0.1481	0.2742	0.2444	0	0.176	0.1083	0.7423	0	0	0.1846	0	0	0	0	0	0	0.7957	0	0	0	0.637	0.0889	0.2148	0.0815	0.1926	0.5407	0.6	0.5407	0.0889	0.5273	0.7952	0.4096	0.5181	0.5821	0.5821	0.6068	0.5093	0.6444	0	0.5827	0.04	0.5285	0.5	19
NPAS2	Candidate gene	0.1556	0.2339	0.7852	0.1287	0.6	0.5667	0.7423	0	0.75	0.7	0.0769	0	0	0.6053	0.2297	0.6531	0.2581	0	0.5672	0	0.037	0.2889	0.1333	0.6222	0.1778	0.5407	0.0889	0.5407	0.2148	0.8545	0.2651	0.4819	0.3494	0.0672	0.5821	0.1795	0.5093	0.6444	0.4821	0.7559	0.648	0.5285	0.5	20
UBE4B	Candidate gene	0.163	0.5645	0.2444	0.604	0.6	0.5667	0.9175	0	0	0.2385	0	0	0.25	0.6053	0.6216	0	0.7097	0	0.5373	0	0.2444	0.6519	0.3185	0.6222	0.437	0.5407	0.6	0.5407	0.6444	0.4364	0.1084	0.3614	0.747	0.5821	0.5821	0.6068	0.5093	0.6444	0.4018	0.6693	0.408	0.5285	0.5	21
RIF1	Candidate gene	0.1704	0.3065	0.7852	0.703	0.6	0.5667	0	0	0	0.5923	0	0	0	0	0	0	0.8172	0	0.3582	0	0.637	0.6	0.3926	0.2296	0.5556	0.5407	0.6	0.5407	0.4741	0.1636	0.494	0.7711	0.3855	0.5821	0.0299	0.6068	0.5093	0.1852	0.6071	0.4252	0.168	0.5285	0.5	22
PRKG2	Candidate gene	0.1778	0.3629	0.3556	0.495	0.16	0.5667	0.7423	0	0.5	0.4692	0.2885	0	0.475	0	0.1757	0.6531	0.5269	0	0.7164	0	0.637	0.4074	0.2444	0.6222	0.8	0.5407	0.6	0.5407	0.4889	0.6545	0.0964	0.5663	0.9759	0.5821	0.5821	0.6068	0.5093	0.6444	0.1875	0.1417	0.568	0.5285	0.5	23
SSB	Candidate gene	0.1852	0.9355	0.2444	0.3861	0.6	0.5667	0.7423	0	0.1324	0.6	0	0	0.6	0.6053	0.6216	0.6531	0	0	0.6418	0	0.163	0.4889	0.4741	0.2074	0.5778	0.5407	0.6	0.0593	0.5185	0.1455	0.9398	0.2651	0.1807	0.5821	0.5821	0.6068	0.5093	0.6444	0.7321	0.4252	0.024	0.5285	0.5	24
TEAD1	Candidate gene	0.1926	0.2016	0.1259	0.2376	0.6	0.5667	0	0	0.75	0.3923	0.4615	0	0	0	0.6216	0	0.6667	0.6571	0.4925	0.7674	0.0444	0.4074	0.4	0.1778	0.3037	0.5407	0.6	0.5407	0.4222	0.7091	0.1446	0.9639	0.4337	0.5821	0.5821	0.6068	0.5093	0.6444	0	0.5039	0.056	0.5285	0.5	25
SLC1A5	Candidate gene	0.2	0.3306	0.5333	0.5743	0.6	0.5667	0.1856	0.6111	0	0.4769	0.7692	0	0	0.6053	0.6216	0.1837	0.871	0	0	0	0.637	0.437	0.363	0.2148	0.4296	0.5407	0.6	0.5407	0.4593	0.5818	0.8795	0.759	0.4458	0.5821	0.5821	0.6068	0	0.6444	0.3393	0.1417	0.488	0.5285	0.5	26
CLSTN1	Candidate gene	0.2074	0.8468	0.3704	0.6832	0.6	0.5667	0.4021	0	0	0.4615	0	0	0	0	0	0	0	0	0	0	0.637	0.2741	0.1778	0.1333	0.4	0.5407	0.163	0.5407	0.4	0.7636	0.6867	0.6145	0.3133	0.5821	0.1418	0.6068	0.5093	0.6444	0.2411	0.2441	0.112	0.5285	0.5	27
H6PD	Candidate gene	0.2148	0.5081	0.2889	0.2574	0.6	0.5667	0.1856	0.6111	0.2647	0.1538	0	0	0.25	0	0.6216	0.6531	0.2796	0.6571	0.1642	0.2791	0.2	0.8444	0.7556	0.6222	0.8	0.5407	0.6	0.5407	0.8444	0.1818	0.3373	0.6988	0.6988	0.5821	0.5821	0.6068	0	0.6444	0.2143	0.2677	0.744	0.5285	0.5	28
SCN1A	Candidate gene	0.2222	0.2258	0.437	0.6535	0.6	0.5667	0.7423	0.6111	0.75	0.5846	0.7692	0	0	0	0.6216	0	0.172	0.6571	0.3731	0.8605	0.637	0.4074	0.1481	0.6222	0.8	0.5407	0.6	0.5407	0.4	0	0.759	0.253	0.1928	0.5821	0.5821	0.6068	0.5093	0.6444	0.0893	0.1181	0.608	0.5285	0.5	29
RARS2	Candidate gene	0.2296	0.7742	0.7852	0.8119	0.6	0.5667	0.5258	0	0.75	0.6538	0.4615	0	0	0.6053	0.6216	0.6531	0	0.6571	0.6418	0.6977	0.637	0.2222	0.4963	0.6222	0.5852	0.5407	0.6	0.5407	0.2296	0	0	0	0	0.5821	0.5821	0.1966	0	0.6444	0.3571	0.4252	0.264	0.5285	0.5	30
PIP4K2A	Candidate gene	0.237	0.5323	0.2	0.1188	0.6	0.5667	0	0	0.4118	0.8692	0.1346	0.6857	0.475	0.6053	0.0811	0.6531	0.4301	0	0	0	0.637	0.3185	0.7556	0.6222	0.4222	0.5407	0.6	0.5407	0.5037	0.5636	0.8193	0.5783	0.2169	0.5821	0.5821	0.6068	0.5093	0.6444	0.7589	0.3465	0.784	0.5285	0.5	31
CNR1	Candidate gene	0.2444	0.0726	0.1481	1	0.6	0.5667	0.9794	0.6111	0.75	0.1077	0.3654	0.6857	0.475	0.6053	0.6216	0.6531	0.1075	0	0.0746	0.186	0.1037	0.637	0.3481	0.6222	0.8	0.5407	0.6	0.037	0.8444	0.9455	0.4458	0.0482	0.4699	0.5821	0.0746	0.6068	0	0.163	0.0089	0.8425	0.312	0.5285	0.5	32
TIMP2	Candidate gene	0.2519	0.1048	0.0667	0.2475	0.6	0.5667	0.1856	0	0.25	0.0308	0.7692	0.6857	0	0.6053	0.6216	0.6531	0.1183	0	0.5522	0.2326	0.1481	0.8444	0.7556	0.6222	0.8	0.5407	0.6	0.5407	0.8444	0.7273	0.8313	0.988	0.4217	0.1119	0.0299	0.0684	0.5093	0.6444	0.1071	0.1969	0.52	0.5285	0.5	33
EIF2B3	Candidate gene	0.2593	0.1855	0.3407	0.396	0.6	0.5667	0	0	0.75	0.8	0.4615	0.6857	0	0.6053	0.6216	0.6531	0.957	0.6571	0	0.3721	0.2222	0.6815	0.3704	0.6222	0.4593	0.5407	0.6	0.5407	0.6815	0	0.2289	0.7108	0.4096	0.5821	0.1418	0.6068	0.5093	0.6444	0.0804	0.7087	0.232	0.5285	0.5	34
SRSF10	Candidate gene	0.2667	0.2823	0.7852	0.7921	0.6	0.5667	0.5258	0	0	0.2	0	0.6857	0.25	0	0.6216	0	0	0	0.1791	0	0.637	0.6667	0.3037	0.1556	0.3333	0.5407	0.1259	0.5407	0.6148	0	0	0	0	0.5821	0.5821	0.6068	0.5093	0.6444	0	0.6378	0	0	0.5	35
TMTC3	Candidate gene	0.2741	0.4919	0.7852	0	0.6	0.5667	0.4021	0	0.75	0.7538	0	0	0	0	0	0	0	0	0.194	0	0.637	0.1407	0.7556	0.6222	0.1259	0.5407	0.6	0.5407	0.1407	0	0	0	0	0.5821	0.5821	0.6068	0.5093	0.1778	0.6161	0.0315	0.76	0.5285	0.5	36
TLK1	Candidate gene	0.2815	0.4677	0.7852	0.6733	0.16	0.5667	0.9175	0	0	0.4	0	0.6857	0	0	0.6216	0	0.7312	0	0	0	0.1926	0.5111	0.3704	0.6222	0.4889	0.5407	0.6	0.5407	0.5407	0.2182	0.2048	0.3133	0.6386	0.5821	0.5821	0.6068	0.5093	0.6444	0	0.5039	0.392	0.0407	0.5	37
ACOT7	Candidate gene	0.2889	0.8065	0.2	0.3168	0.6	0.5667	0.1856	0	0.3382	0.3846	0	0	0	0	0.6216	0.6531	0.7204	0	0	0	0.637	0.4741	0.4148	0.6222	0.2074	0.5407	0.6	0.5407	0.5556	0.7455	0.5301	0.6627	0.241	0.5821	0.5821	0.6068	0.5093	0.2074	0.5089	0.4252	0.936	0.5285	0.5	38
FRAS1	Candidate gene	0.2963	0.7742	0.4	0.7822	0.088	0.5667	0.1856	0	0	0.6154	0	0	0	0	0	0	0.6667	0.6571	0.5821	0.907	0.637	0.1407	0.7556	0.6222	0.1259	0.5407	0.6	0.5407	0.1407	0	0.0482	0.5301	0.6747	0.5821	0.5821	0.0684	0.5093	0.1037	0.9643	0.0157	0.208	0.5285	0.5	39
IL18	Candidate gene	0.3037	0.0806	0.0963	0.099	0.6	0.5667	0.5258	0	0.1176	0.0462	0.7692	0.3429	0.95	0.6053	0.1351	0.6531	0.086	0	0.3433	0.2093	0.0593	0.4519	0.3037	0.6222	0.3333	0.5407	0.6	0.5407	0.5778	0.4909	0.5783	0.7952	0.8313	0.5821	0.5821	0.6068	0.5093	0.6444	0.1429	0.8819	0.984	0.5285	0.5	40
DPF3	Candidate gene	0.3111	0.3871	0.3185	0.5545	0.144	0.5667	0	0	0	0.8923	0	0	0	0	0	0	0.4731	0	0	0	0.637	0.3778	0.1778	0.6222	0.237	0.5407	0.6	0.5407	0.3704	0	0	0	0	0.5821	0.5821	0	0	0.6444	0	0	0.28	0.5285	0.5	41
EPC1	Candidate gene	0.3185	0.2097	0.4593	0.2079	0.6	0.5667	0.5258	0	0	0.5077	0	0	0	0	0	0	0.7527	0	0.4328	0	0.237	0.6593	0.4667	0.1926	0.8	0.5407	0.6	0.5407	0.6667	0	0	0	0	0.5821	0.5821	0	0.5093	0.237	0.7143	0.7087	0.44	0.5285	0.5	42
CEP290	Candidate gene	0.3259	0.121	0.4148	0.6337	0.6	0	0.7423	0	0.4118	0.5308	0.7692	0	0	0.6053	0.6216	0.6531	0.3656	0.6571	0.7761	0.3953	0.637	0.2741	0.1778	0.6222	0.2667	0.5407	0.6	0.5407	0.4444	0.2545	0.3614	0.4578	0.8554	0.5821	0.5821	0.6068	0.5093	0.2889	0	0.9449	0.32	0.5285	0.5	43
MYO3B	Candidate gene	0.3333	0.2903	0.7852	0	0.16	0.5667	0	0	0	0.6077	0	0	0	0	0	0	0.5376	0	0	0	0.637	0.0963	0.0889	0.1333	0.8	0.5407	0.6	0.5407	0.0963	0	0	0	0	0.5821	0.5821	0.6068	0.5093	0.6444	0.4375	0.685	0.704	0.5285	0.5	44
PNRC2	Candidate gene	0.3407	0.5242	0.3185	0.802	0.6	0.5667	0	0	0	0.2308	0	0	0	0	0	0	0	0	0.1343	0	0.637	0.5333	0.3481	0.1111	0.3333	0.5407	0.1556	0.5407	0.6	0	0	0	0	0.5821	0.5821	0.6068	0.5093	0.6444	0	0.8819	0.192	0.5285	0.5	45
GNE	Candidate gene	0.3481	0.8629	0.1111	0.7525	0.6	0.5667	0.5258	0	0.4118	0.5462	0	0	0.25	0	0.6216	0	0.4839	0.6571	0.2537	0.5581	0.637	0.5481	0.7556	0.6222	0.3333	0.5407	0.6	0.5407	0.6	0.9273	0.2771	0.5181	0.8434	0.0373	0.5821	0.1026	0.5093	0.6444	0.0714	0.6693	0.304	0.5285	0.5	46
TIMM8B	Candidate gene	0.3556	0.3226	0.5333	0.3564	0.6	0.5667	0.5258	0	0	0.1615	0.7692	0	0	0	0.6216	0	0.4194	0	0	0	0.637	0.6296	0.7556	0.6222	0.5704	0.5407	0.6	0.5407	0.6519	0	0.7108	0.8795	0.3976	0.5821	0.5821	0	0	0.6444	0.375	0.315	0.496	0.5285	0.5	47
SPSB1	Candidate gene	0.363	0.7419	0.2444	0.7723	0.6	0.5667	0	0	0	0.3692	0.7692	0	0	0	0.6216	0	0.6559	0	0	0	0.637	0.2593	0.2148	0.6222	0.4444	0.5407	0.0889	0.5407	0.2519	0	0.0723	0.9398	0.6024	0.5821	0.5821	0.6068	0.5093	0.6444	0.4464	0.1811	0.24	0.5285	0.5	48
C12orf29	Candidate gene	0.3704	0	0.7852	0	0	0	0	0	0.75	0	0	0	0	0	0	0	0	0	0	0	0.637	0.1407	0.7556	0.6222	0.1259	0.5407	0.6	0.5407	0.1407	0.3091	0.7229	0.3735	0.3012	0.5821	0.0299	0.6068	0.5093	0.6444	0.7054	0.4252	0.592	0.5285	0.5	49
CPSF2	Candidate gene	0.3778	0.4516	0.7852	0.9208	0.6	0.5667	0.7423	0	0.75	0.5	0.4615	0.6857	0.25	0.6053	0.6216	0.6531	0.4516	0	0	0	0.637	0.5259	0.2815	0.1111	0.2296	0.5407	0.6	0.5407	0.5926	0	0	0	0	0.0672	0.5821	0.6068	0.5093	0.6444	0.7232	0.4882	0.688	0.5285	0.5	50
RECK	Candidate gene	0.3852	0.4435	0.2963	0.5446	0.6	0.5667	0.1856	0	0.75	0.1231	0	0	0	0.6053	0.6216	0.6531	0.4086	0	0.3881	0	0.637	0.8444	0.7556	0.6222	0.8	0.5407	0.6	0.5407	0.8444	0.5455	0.747	0.7831	0.3253	0.1045	0.5821	0.1453	0	0.6444	0.4732	0.6063	0.416	0.0407	0.5	51
GORASP2	Candidate gene	0.3926	0.7258	0.1333	0.8713	0.6	0.5667	0	0	0	0.2538	0.7692	0	0	0	0.6216	0	0.8172	0	0	0	0.637	0.6222	0.4889	0.2222	0.5481	0.5407	0.1852	0.5407	0.6296	0.6909	0.4819	0.2289	0.6506	0.5821	0.1418	0.6068	0.5093	0.6444	0.3125	0.4252	0.536	0.5285	0.5	52
CYP39A1	Candidate gene	0.4	0.629	0.7852	0.198	0.6	0.5667	0.1856	0	0.3235	0.2692	0.1346	0.6857	0.1	0.6053	0.6216	0.6531	0	0	0	0	0.1778	0.8444	0.7556	0.6222	0.8	0.5407	0.6	0.5407	0.8444	0	0.9036	0.3373	0.3614	0.5821	0.0075	0.6068	0.5093	0.6444	0.75	0.2677	0.6	0.5285	0.5	53
COMMD10	Candidate gene	0.4074	0.7258	0.7852	0.4752	0.6	0.5667	0	0	0	0.1769	0	0	0	0	0	0	0.3226	0	0	0	0.637	0.4074	0.2593	0.6222	0.563	0.5407	0.6	0.5407	0.4	0	0.7711	0.6265	0.5663	0.5821	0.5821	0.6068	0.5093	0.6444	0.7679	0.811	0.632	0.5285	0.5	54
NMNAT1	Candidate gene	0.4148	0.6129	0.1037	0.7228	0.6	0.5667	0	0.6111	0.4118	0.7154	0.2885	0	0.25	0.6053	0.6216	0.6531	0.957	0.6571	0.5224	0	0.2148	0.2	0.4222	0.6222	0.4074	0.5407	0.6	0.5407	0.2296	0	0	0	0	0.5821	0.5821	0.6068	0	0.6444	0.9286	0.4252	0.736	0.5285	0.5	55
TTYH1	Candidate gene	0.4222	0.5968	0.5333	0.901	0.6	0.5667	0.5258	0	0	0.4385	0.7692	0	0	0	0.6216	0	0	0	0.7463	0	0.637	0.1407	0.0963	0.6222	0.1259	0.5407	0.6	0.5407	0.1407	0	0.6747	0.1687	0.1205	0.5821	0.5821	0.6068	0.5093	0.6444	0.3482	0.9213	0.352	0.5285	0.5	56
CWC22	Candidate gene	0.4296	0.6694	0.7852	0.5248	0.6	0.5667	0	0	0.75	0.8308	0	0	0	0	0	0	0.2043	0	0	0	0.637	0.2222	0.3259	0.1333	0.4815	0.5407	0.6	0.0741	0.3111	0	0	0	0	0.5821	0.5821	0.6068	0.5093	0.6444	0.4554	0.2126	0	0.5285	0.5	57
GALNT3	Candidate gene	0.437	0.7742	0.7852	0.7624	0.6	0.5667	0.1856	0	0.75	0.2769	0.7692	0	0.25	0	0.6216	0.6531	0.7742	0.6571	0.3134	0.6279	0.637	0.8444	0.7556	0.6222	0.8	0.5407	0.6	0.5407	0.8444	0.2727	0.4217	0.7349	0.6867	0.5821	0.5821	0.6068	0	0.6444	0.8036	0.2047	0.648	0.5285	0.5	58
SYT9	Candidate gene	0.4444	0.4758	0.7852	0	0.6	0.5667	0.5258	0	0.75	0.6308	0	0	0.725	0	0	0	0.5806	0	0	0	0.1333	0.5852	0.437	0.6222	0.5333	0.5407	0.163	0.5407	0.6148	0	0	0	0	0.5821	0.5821	0.6068	0.5093	0.6444	0.8929	0.6299	0.432	0.5285	0.5	59
RIMS1	Candidate gene	0.4519	0.129	0.1926	0.3762	0.6	0.5667	0.4021	0	0.75	0.9077	0.7692	0	0	0.6053	0.6216	0.6531	0.3763	0.6571	0.7015	0.7674	0.1852	0.8444	0.3852	0.1926	0.5037	0.5407	0.6	0.037	0.8444	0.6	0.3976	0.3253	0.8193	0.5821	0.0746	0.6068	0.5093	0.6444	0.1607	0.685	0.216	0.5285	0.5	60
TNFAIP6	Candidate gene	0.4593	0.5484	0.163	0.5149	0.6	0.5667	0.1856	0	0.75	0.1154	0	0	0	0	0	0	0.3333	0	0.8955	0	0.637	0.2222	0.7556	0.6222	0.8	0.5407	0.6	0.5407	0.3111	0.8909	0.253	0.3976	0.759	0.5821	0.5821	0.1624	0.5093	0.6444	0.2679	0.0866	0.104	0.5285	0.5	61
DLAT	Candidate gene	0.4667	0.4274	0.2444	0.4059	0.6	0	0	0.6111	0	0.3462	0	0.6857	0.8	0	0.6216	0.6531	0.9032	0.6571	0	0.4419	0.637	0.5704	0.7556	0.6222	0.5185	0.5407	0.6	0.5407	0.5778	0	0	0	0	0.5821	0.5821	0	0	0.6444	0	0	0.08	0.5285	0.5	62
SCN9A	Candidate gene	0.4741	0.1694	0.437	0.6238	0.6	0.5667	0.7423	0.6111	0.75	0.8462	0.7692	0	0	0	0.6216	0	0.3871	0.6571	0.597	0.4884	0.637	0.8444	0.0815	0.6222	0.0889	0.5407	0.6	0.5407	0.8444	0.4727	0.4578	0.4458	0.9036	0.0672	0.5821	0.6068	0.5093	0.6444	0.8482	0.6457	0.48	0.5285	0.5	63
TMEFF2	Candidate gene	0.4815	0.8226	0.0667	0.3366	0.6	0.5667	0.1856	0	0	0.8538	0	0	0	0.6053	0.6216	0	0.2688	0	0.3284	0.6744	0.637	0.8444	0.7556	0.6222	0.8	0.5407	0.6	0.5407	0.8444	0	0	0	0	0.5821	0.5821	0.6068	0.5093	0.6444	0.3661	0.6142	0.4	0.5285	0.5	64
OLFML1	Candidate gene	0.4889	0.8226	0.1778	0	0.6	0.5667	0.1856	0	0	0.3	0	0	0	0	0	0	0	0	0	0	0.637	0.8444	0.7556	0.6222	0.8	0.5407	0.6	0.5407	0.8444	0.8364	0.1687	0.1084	0.2892	0.1418	0.5821	0.1197	0.5093	0.6444	0.8125	0.2992	0.528	0.5285	0.5	65
CSMD2	Candidate gene	0.4963	0.9355	0.4667	0	0.6	0.5667	0.5258	0	0	0.9692	0	0	0	0	0	0	0.3978	0	0	0	0.637	0.8444	0.1111	0.6222	0.1926	0.0667	0.6	0.5407	0.8444	0	0	0	0	0.5821	0.5821	0.0684	0.5093	0.2519	0.1339	0.0472	0.248	0.5285	0.5	66
DYNC1I2	Candidate gene	0.5037	0.6452	0.4963	0.9901	0.6	0.5667	0.7423	0	0.4118	0.5615	0.7692	0	0.475	0.6053	0.6216	0.6531	0.957	0	0.6866	0	0.637	0.6889	0.2148	0.6222	0.4889	0.5407	0.6	0.5407	0.6519	0	0	0	0	0.1418	0.5821	0	0.5093	0.6444	0.5	0.5748	0.648	0.5285	0.5	67
UBR3	Candidate gene	0.5111	0.5806	0.7852	0	0.6	0.5667	0.9175	0	0	0.9231	0	0	0	0	0	0	0.3548	0	0.1194	0	0.637	0.5111	0.4519	0.6222	0.3333	0.5407	0.6	0.5407	0.4889	0	0	0	0	0.5821	0.5821	0.6068	0.5093	0.2	0.7946	0.4252	0.456	0.0407	0.5	68
ZFYVE1	Candidate gene	0.5185	0.6855	0.7852	0	0.6	0.5667	0.7423	0	0.75	0.8077	0	0	0	0	0	0	0	0	0	0	0.637	0.3185	0.7556	0.6222	0.8	0.5407	0.6	0.5407	0.3111	0	0	0	0	0.5821	0.5821	0.6068	0.5093	0.1481	0.6518	0.6693	0.584	0.5285	0.5	69
TTC21B	Candidate gene	0.5259	0.5403	0.3481	0.7327	0.6	0.5667	0.7423	0	0	0.7923	0	0	0	0	0	0	0.4946	0.6571	1	0	0.637	0.6074	0.7556	0.6222	0.1259	0.5407	0.6	0.5407	0.5407	0	0.2892	0.1205	0.7108	0.5821	0.5821	0.6068	0.5093	0.1185	0.4911	0.4252	0.8	0.5285	0.5	70
CCNA1	Candidate gene	0.5333	0.4839	0.7852	0.4257	0.6	0.5667	0	0	0.2794	0.0846	0.7692	0.3143	0.6	0.6053	0.6216	0.1837	0.6022	0	0.8209	0.6512	0.637	0.6741	0.5037	0.6222	0.5111	0.5407	0.1926	0.5407	0.637	1	0.9157	0.747	0.7229	0.5821	0.5821	0.6068	0.5093	0.6444	0.2857	0.5512	0.064	0.5285	0.5	71
LUC7L	Candidate gene	0.5407	0.5565	0.7852	0.4752	0.6	0.5667	0.7423	0	0.75	0.6923	0	0	0	0	0	0	0	0	0.8358	0	0.637	0.6148	0.3481	0.6222	0.4741	0.5407	0.1037	0.5407	0.4	0	0.5422	0.8434	0.8675	0.5821	0.5821	0.6068	0.5093	0.6444	0.5804	0.5039	0.256	0.5285	0.5	72
TTYH1	Candidate gene	0.5481	0.5968	0.5333	0.901	0.6	0.5667	0	0	0	0.4385	0	0	0	0	0.6216	0	0	0	0.7463	0	0.637	0.1407	0.7556	0.6222	0.1259	0.5407	0.6	0.5407	0.1407	0	0	0	0	0.5821	0.5821	0	0	0.6444	0	0	0.352	0.5285	0	73
ZNF385B	Candidate gene	0.563	0.7177	0.7852	0	0.104	0.125	0.1856	0	0	0.4231	0	0	0	0	0	0	0.2903	0	0	0	0.637	0.8444	0.7556	0.6222	0.8	0.5407	0.6	0.5407	0.8444	0	0	0	0	0.5821	0.5821	0.6068	0.5093	0.1111	0.4643	0.3465	0.176	0.5285	0.5	75
ORC3	Candidate gene	0.5704	0.6613	0.7852	0.2178	0.6	0.5667	0.0103	0	0.4118	0.8615	0.7692	0.6857	0.25	0.6053	0.6216	0.6531	0.8065	0	0.9552	0	0.637	0.4444	0.4593	0.6222	0.4593	0.5407	0.6	0.5407	0.5259	0.2364	0.9759	0.4699	0.6145	0.5821	0.5821	0.6068	0.5093	0.2593	0.2589	0.7559	0	0	0.5	76
CPEB4	Candidate gene	0.5778	0.9355	0.7852	0.2673	0.6	0.5667	0	0	0	0.2615	0	0	0	0	0	0	0.5699	0	0	0	0.637	0.8444	0.7556	0.6222	0.8	0.5407	0.6	0.5407	0.8444	0	0	0	0	0.5821	0.5821	0.6068	0.5093	0.6444	0.1696	0.0079	0.144	0.5285	0.5	77
GLIPR2	Candidate gene	0.5852	0.8226	0.1333	0	0.6	0.5667	0.7423	0.6111	0.75	0.1462	0	0	0	0	0	0	0.7419	0	0	0	0.2667	0.1926	0.7556	0.6222	0.4444	0.5407	0.6	0.5407	0.2	0	0	0	0	0.5821	0.1119	0	0	0.6444	0.8571	0.315	0	0.5285	0.5	78
NMI	Candidate gene	0.5926	0.4032	0.7852	0.1584	0.6	0.5667	0.7423	0	0	0.4538	0	0.6857	0	0.6053	0.6216	0.6531	0.8925	0	0	0	0.637	0.4963	0.2741	0.237	0.3704	0.5407	0.1481	0.0667	0.5333	0.3636	0.9518	0.4217	0.1325	0.5821	0.5821	0.6068	0.5093	0.6444	0.9196	0.7559	0.072	0.5285	0.5	79
CYBRD1	Candidate gene	0.6	0.3387	0.5333	0.2871	0.6	0.5667	0.1856	0	0.3088	0.4077	0.4231	0	0	0	0.6216	0	0.1828	0	0.5075	0	0.0963	0.8444	0.7556	0.6222	0.8	0.5407	0.6	0.5407	0.8444	0	1	0.5542	0.5904	0.5821	0.5821	0.1453	0.5093	0.1259	0.7857	0.0866	0.864	0.5285	0.5	80
FAM217B	Candidate gene	0.6074	0	0.7852	0	0	0.5667	0.5258	0	0	0.3231	0	0	0	0	0	0	0	0	0	0	0.637	0.1407	0.7556	0.6222	0.8	0.5407	0.6	0.5407	0.1407	0	0	0	0	0.5821	0.5821	0.6068	0.5093	0.6444	0	0.7559	0	0	0.5	81
ACTR6	Candidate gene	0.6148	0.9355	0.7852	0.9703	0.6	0.5667	0	0	0	0.3615	0	0	0	0	0	0	0	0	0	0	0.637	0.4074	0.4296	0.6222	0.5926	0.5407	0.6	0.5407	0.4	0	0.8675	0.1446	0.5301	0.5821	0.5821	0.6068	0.5093	0.6444	0.4286	0.3465	0.16	0.5285	0.5	82
ARL5A	Candidate gene	0.6222	0.8387	0.1481	0.8416	0.6	0.5667	0	0.6111	0.75	0.3077	0	0	0	0	0	0	0	0	0	0	0.637	0.3185	0.3037	0.6222	0.8	0.5407	0.6	0.5407	0.3704	0	0.5181	0.241	0.9277	0.5821	0.5821	0.6068	0.5093	0.6444	0.625	0.622	0.776	0.5285	0.5	83
CLTA	Candidate gene	0.6296	0.2661	0.7852	0.3465	0.6	0.5667	0.7423	0	0.75	0.6231	0.3654	0	0.85	0.6053	0.6216	0.1837	0.957	0	0	0	0.1259	0.6444	0.2593	0.163	0.3926	0.5407	0.6	0.5407	0.6741	0.8182	0.7831	0.6386	0.3373	0.5821	0.5821	0.6068	0.5093	0.6444	0.5536	0.8583	0.712	0.5285	0.5	84
KCNIP1	Candidate gene	0.637	0.2177	0.363	0.4356	0.6	0.5667	0.5258	0	0.75	0.9692	0	0	0.725	0	0	0	0.7742	0	0	0	0.637	0.8444	0.7556	0.6222	0.8	0.5407	0.6	0.037	0.8444	0	0.0602	0.8072	0.494	0.5821	0.0746	0.6068	0.5093	0.6444	0.6339	0.5984	0.336	0.5285	0.5	85
KLHL23	Candidate gene	0.6444	0	0.7852	0	0.6	0.5667	0	0	0	0.2462	0	0	0	0	0	0	0	0	0	0	0.637	0.4593	0.7556	0.6222	0.8	0.5407	0.6	0.5407	0.4593	0.6727	0.3012	0.3494	0.9398	0.5821	0.5821	0.6068	0.5093	0.6444	0	0	0.624	0.5285	0.5	86
TMEM201	Candidate gene	0.6519	0.9355	0.7852	0	0.6	0.5667	0.1856	0	0	0.6462	0	0	0	0	0	0	0	0	0	0	0.637	0.1407	0.7556	0.6222	0.1259	0.5407	0.6	0.5407	0.1407	0	0	0	0	0.5821	0.5821	0.0684	0.5093	0.6444	0	0.9291	0.504	0.5285	0.5	87
SCYL2	Candidate gene	0.6593	0.1452	0.7852	0.7426	0.112	0.5667	0.7423	0	0	0.7462	0	0	0	0	0	0	0	0	0	0	0.637	0.5111	0.4074	0.1111	0.3778	0.5407	0.6	0.5407	0.4593	0	0.1807	0.6506	0.2289	0.5821	0.5821	0.6068	0.5093	0.6444	0.9554	0.9055	0.616	0.5285	0.5	88
SESTD1	Candidate gene	0.6667	0.6935	0.7852	0.505	0.6	0.5667	0.7423	0	0	0.8154	0	0	0	0	0	0	0.6882	0	0	0	0.637	0.8444	0.0963	0.6222	0.8	0.5407	0.6	0.5407	0.8444	0	0	0	0	0.5821	0.5821	0.6068	0.5093	0.6444	0	0.4252	0.544	0.5285	0.5	89
MDN1	Candidate gene	0.6741	0.7097	0.7852	0.8218	0.6	0.5667	0.9175	0	0	0.6846	0	0	0.25	0	0.6216	0	0.5376	0	0.806	0	0.637	0.2222	0.4815	0.0889	0.1852	0.5407	0.6	0.5407	0.2741	0.3818	0.8554	0.494	0.9157	0.5821	0.5821	0.0684	0	0.6444	0.5893	0.2362	0.472	0.5285	0.5	90
GLE1	Candidate gene	0.6815	0.3468	0.437	0.6634	0.6	0.5667	0.7423	0	0.75	0.9692	0	0	0	0	0	0	0.957	0.6571	0.6418	0.7442	0.637	0.3185	0.7556	0.6222	0.363	0.5407	0.6	0.5407	0.3111	0.5091	0.3494	0.9036	0.1687	0.5821	0.5821	0.6068	0.5093	0.6444	0	0.4252	0.368	0.5285	0.5	91
PPFIBP2	Candidate gene	0.6889	0.9355	0.2444	0.3069	0.6	0.5667	0.9175	0	0	0.4923	0	0	0	0	0	0	0.8387	0	0	0	0.637	0.5481	0.1481	0.1704	0.1704	0.5407	0.1037	0.5407	0.1926	0.4182	0.9277	0.8193	0.253	0.5821	0.5821	0.6068	0.5093	0.6444	0.5446	0.4252	0.816	0.5285	0.5	92
ECHDC2	Candidate gene	0.6963	0.8548	0.7852	0	0.6	0.5667	0.1856	0	0.2206	0.5615	0	0.6857	0	0	0.6216	0	0	0	0	0	0.637	0.3185	0.7556	0.6222	0.8	0.5407	0.6	0.5407	0.3111	0	0.3253	0.9277	0.3735	0.5821	0.1045	0.1026	0.5093	0.1556	0.3304	0.5906	0.904	0.5285	0.5	93
DZANK1	Candidate gene	0.7037	0.7742	0.7852	0	0.6	0.5667	0.3608	0	0	0.7692	0	0	0	0	0	0	0	0	0	0	0.637	0.2222	0.7556	0.6222	0.8	0.5407	0.6	0.5407	0.2296	0	0.506	0.9157	0.5542	0.5821	0.5821	0.6068	0.5093	0.6444	0.5179	0.7559	0	0	0.5	94
IL22RA1	Candidate gene	0.7111	0.6371	0.1704	0.6931	0.128	0.5667	0.1856	0	0.75	0.7615	0	0	0.775	0.6053	0.6216	0.6531	0.7742	0	0.9701	1	0.637	0.2222	0.1185	0.6222	0.2667	0.5407	0.6	0.5407	0.2296	0	0.1325	0.2771	0.6265	0.5821	0.5821	0.6068	0.5093	0.6444	0.3839	0.7559	0.912	0.5285	0.5	95
SLC25A27	Candidate gene	0.7185	0.1613	0.5333	0.2772	0.6	0.5667	0	0	0	0.3308	0	0.6857	0	0	0.6216	0	0.3118	0	0	0.8837	0.637	0.8444	0.7556	0.6222	0.8	0.5407	0.6	0.5407	0.8444	0	0	0	0	0.5821	0.5821	0	0	0.6444	0.5714	0.3307	0.792	0.5285	0.5	96
CTNNBIP1	Candidate gene	0.7259	0.1129	0.2444	0.1782	0.6	0.5667	0	0	0.2941	0.4154	0	0	0.475	0.6053	0.6216	0.6531	0	0	0.9403	0	0.637	0.5333	0.4444	0.6222	0.8	0.5407	0.6	0.5407	0.5556	0.8727	0.6386	1	0.6627	0.5821	0.5821	0	0	0.6444	0.2768	0.9921	0.664	0.5285	0.5	97
BCO2	Candidate gene	0.7333	0.3952	0.7852	0.5842	0.6	0.5667	0.1856	0	0.75	0.3385	0	0.6857	0	0	0.6216	0	0.5591	0	0.4776	0	0.637	0.8444	0.7556	0.6222	0.8	0.5407	0.6	0.5407	0.8444	0	0	0	0	0.5821	0.5821	0.6068	0.5093	0.2815	0	0.2913	0.96	0.5285	0.5	98
CSRNP3	Candidate gene	0.7407	0.25	0.4815	0.297	0.6	0	0.7423	0	0	0.7846	0	0	0	0	0	0	0.6452	0	0.6418	0	0.637	0.8444	0.7556	0.6222	0.8	0.5407	0.6	0.5407	0.8444	0	0.8434	0.5422	0.2048	0.5821	0.5821	0.6068	0.5093	0.6444	0.9107	0.1417	0	0.5285	0.5	99
C12orf50	Candidate gene	0.7481	0.7742	0.7852	0	0.6	0	0	0	0	0	0	0	0	0	0	0	0.6129	0	0	0	0.637	0.8444	0.7556	0.6222	0.8	0.5407	0.6	0.5407	0.8444	0	0	0	0	0.5821	0.5821	0	0.5093	0.6444	0.2054	0.7559	0.296	0.5285	0.5	100
BMP3	Candidate gene	0.7556	0.1935	0.0519	0.2277	0.6	0.5667	0.1856	0	0.75	0.5154	0	0.2857	0	0	0.1486	0	0.2473	0	0.9851	0.9535	0.637	0.8444	0.7556	0.6222	0.8	0.5407	0.6	0.5407	0.8444	0.8	0.2169	0.2169	0.8916	0.5821	0.5821	0.6068	0.5093	0.6444	0.1518	0.2677	0.376	0.5285	0.5	101
PIH1D2	Candidate gene	0.763	0	0.7852	0	0.6	0.5667	0	0	0	0.6615	0	0	0	0	0	0	0	0	0	0	0.637	0.8444	0.7556	0.6222	0.8	0.5407	0.6	0.5407	0.8444	0	0	0	0	0.5821	0.5821	0.6068	0.5093	0.6444	0.6964	0.7559	0.848	0	0.5	102
SLC17A8	Candidate gene	0.7704	0.2984	0.437	0	0.6	0.5667	0.9794	0	0.75	0.7385	0.7692	0	0.475	0	0.6216	0.6531	0.6237	0.6571	0.8806	0.6047	0.2593	0.8444	0.7556	0.6222	0.8	0.5407	0.6	0.5407	0.8444	0	0	0	0	0.5821	0.5821	0.0684	0.5093	0.6444	0.5625	0.1417	0.712	0.5285	0.5	103
SLC35A1	Candidate gene	0.7778	0.3548	0.5333	0.8812	0.6	0.5667	0.1856	0	0.75	0.7308	0.7692	0	0	0.6053	0.6216	0	0	0.6571	0.6418	0.5814	0.2074	0.8444	0.7556	0.6222	0.8	0.5407	0.6	0.5407	0.8444	0	0	0	0	0.097	0.5821	0.6068	0	0.6444	0.6607	0.9449	0.272	0.5285	0.5	104
METTL5	Candidate gene	0.7852	0.9355	0.7852	0	0.6	0.5667	0	0	0.75	0.8923	0	0	0	0	0	0	0	0	0	0	0.637	0.1407	0.7556	0.6222	0.1259	0.5407	0.6	0.5407	0.1407	0	0.6145	0.8313	0.506	0.0672	0.5821	0.6068	0.5093	0.6444	0.9018	0.6535	0.464	0.5285	0.5	105
LZIC	Candidate gene	0.7926	0.5726	0.7852	0.4752	0.6	0.5667	0.7423	0	0	0.8231	0	0	0	0	0	0	0	0	0	0.9767	0.2519	0.3185	0.7556	0.6222	0.2222	0.5407	0.6	0.5407	0.3111	0	0	0	0	0.5821	0.5821	0.6068	0	0.6444	0.6696	0.8346	0.672	0.5285	0.5	106
C11orf57	Candidate gene	0.8	0	0.7852	0	0	0	0.5258	0	0	0.5308	0	0	0	0	0	0	0	0	0	0	0.637	0.3185	0.7556	0.6222	0.8	0.5407	0.6	0.5407	0.3111	0	0	0	0	0.5821	0.5821	0.6068	0.5093	0.6444	0	0.8819	0.872	0.5285	0.5	107
NEB	Candidate gene	0.8148	0.379	0.2444	0.6436	0.6	0.5667	0.7423	0	0.4118	0.5538	0.7692	0.6857	0	0	0.6216	0.6531	0.6237	0.6571	0	0.814	0.2296	0.4741	0.2444	0.6222	0.4148	0.5407	0.6	0.5407	0.2741	0.9818	0.9639	0.8675	0.8072	0.0672	0.5821	0.6068	0.5093	0.6444	0.8839	0.0472	0.752	0.5285	0	109
ARSJ	Candidate gene	0.8222	0.871	0.1852	0.3663	0.6	0.5667	0.9175	0	0.75	0.7077	0.1346	0	0	0	0.0676	0	0.4409	0	0	0	0.637	0.8444	0.7556	0.6222	0.8	0.5407	0.6	0.5407	0.8444	0	0.6024	0.6867	0.2651	0.5821	0.5821	0.6068	0.5093	0.6444	0.5982	0.3701	0.944	0.5285	0.5	110
NABP1	Candidate gene	0.8296	0.7016	0.7852	0.9406	0.6	0.5667	0	0	0	0.2077	0	0	0	0	0	0	0	0	0	0	0.637	0.2519	0.7556	0.6222	0.2667	0.5407	0.6	0.5407	0.2593	0	0.5542	0.8916	0.4578	0	0.5821	0.6068	0.5093	0.6444	0.4196	0.8583	0	0	0.5	111
SLC25A33	Candidate gene	0.837	0.6452	0.5333	0.5941	0.6	0.5667	0.9794	0	0	0.3154	0	0	0	0	0	0	0	0	0	0	0.637	0.8444	0.7556	0.6222	0.8	0.5407	0.6	0.5407	0.8444	0	0	0	0	0.5821	0.5821	0	0.5093	0.6444	0.6429	0.3465	0.824	0.5285	0.5	112
ANKFN1	Candidate gene	0.8444	0	0.7852	0	0.128	0.1333	0.4021	0	0	0.8385	0	0	0	0	0	0	0.957	0	0	0	0.637	0.8444	0.7556	0.6222	0.8	0.5407	0.6	0.5407	0.8444	0	0	0	0	0.5821	0.5821	0.6068	0.5093	0.6444	0.4107	0.4252	0.328	0.5285	0.5	113
PIH1D2	Candidate gene	0.8519	0	0.7852	0	0.6	0.5667	0	0	0	0.6615	0	0	0	0	0	0	0	0	0	0	0.637	0.8444	0.7556	0.6222	0.8	0.5407	0.6	0.5407	0.8444	0	0	0	0	0.5821	0.5821	0	0	0.6444	0	0	0.848	0	0.5	114
RASGEF1B	Candidate gene	0.8593	0.6774	0.7852	0.9604	0.6	0.5667	0	0	0	0.1308	0	0	0	0	0	0	0.4624	0	0	0	0.637	0.8444	0.7556	0.6222	0.8	0.5407	0.6	0.5407	0.8444	0	0	0	0	0.5821	0.5821	0.6068	0.5093	0.6444	0.875	0.1811	0.192	0.5285	0.5	115
KIAA1191	Candidate gene	0.8667	0.9355	0.7852	0.9505	0.6	0.5667	0	0	0	0.9692	0	0	0	0	0	0	0.8495	0	0	0	0.637	0.5704	0.1185	0.6222	0.3778	0.5407	0.6	0.5407	0.3704	0	0	0	0	0.5821	0.5821	0	0.5093	0.2222	0.5357	0.7087	0.56	0.5285	0.5	116
IQCD	Candidate gene	0.8741	0	0.7852	0	0.6	0.5667	0.9175	0	0	0.6769	0	0	0	0	0	0	0	0	0	0	0.637	0.8444	0.7556	0.6222	0.8	0.5407	0.6	0.5407	0.8444	0	0	0	0	0.5821	0.5821	0.6068	0.5093	0.6444	0.6786	0.8189	0.888	0.5285	0.5	117
METTL8	Candidate gene	0.8815	0.4597	0.7852	0	0.6	0.5667	0.5258	0	0	0.6385	0	0	0	0	0	0	0	0	0	0	0.637	0.1407	0.7556	0.6222	0.8	0.5407	0.6	0.5407	0.1407	0	0.6506	0.7229	1	0.5821	0.5821	0.6068	0	0.2148	1	0.8268	0.688	0.5285	0.5	118
UHRF1BP1L	Candidate gene	0.8889	0	0.7852	0.9307	0.6	0.5667	0.7423	0	0	0.7231	0	0	0	0	0	0	0	0	0	0	0.637	0.8444	0.7556	0.6222	0.8	0.5407	0.6	0.5407	0.8444	0	0.8916	0.3012	0.7349	0.5821	0.5821	0.6068	0.5093	0.2296	0.8214	0.9134	0.12	0.5285	0.5	119
RBM43	Candidate gene	0.8963	0.9355	0.7852	0	0.6	0	0	0	0	0.7769	0	0	0	0	0	0	0.957	0	0	0	0.637	0.1407	0.7556	0.6222	0.1259	0.5407	0.6	0.5407	0.1407	0	0	0	0	0.5821	0.5821	0.6068	0.5093	0.6444	0.6875	0.7559	0.976	0.5285	0.5	120
CDH26	Candidate gene	0.9037	0.7742	0.4	0.4455	0.6	0.5667	0.1856	0	0	0.9692	0	0	0	0	0	0	0.5914	0	0	0	0.637	0.8444	0.7556	0.6222	0.8	0.5407	0.6	0.5407	0.8444	0	0	0	0	0.5821	0.5821	0.6068	0.5093	0.6444	0.8304	0.2992	0.992	0.5285	0.5	121
ODF2	Candidate gene	0.9111	0.5161	0.7852	0.4554	0.6	0	0.4021	0	0.4118	0.8769	0.7692	0	0	0.6053	0.6216	0.6531	0.957	0	0.4627	0	0.637	0.2741	0.7556	0.6222	0.2667	0.5407	0.6	0.5407	0.2074	0.9636	0.988	0.9759	0.2771	0.5821	0.5821	0.6068	0.5093	0.2667	0.9732	0.7559	0.288	0.5285	0.5	122
DCAF17	Candidate gene	0.9185	0.9355	0.7852	0.8614	0	0	0.1856	0	0	0.9692	0	0	0	0	0	0	0	0.6571	0	0.3488	0.637	0.4741	0.7556	0.6222	0.3333	0.5407	0.6	0.5407	0.4889	0	0.6265	0.6024	0.5422	0.5821	0.5821	0.6068	0.5093	0.6444	0.9911	0.8583	0	0.5285	0.5	123
SCN7A	Candidate gene	0.9259	0.3145	0.5333	0.7129	0.6	0.5667	0.9794	0	0.75	0.1923	0.7692	0	0	0	0.6216	0	0.2366	0	0.8657	0	0.637	0.8444	0.7556	0.6222	0.8	0.5407	0.6	0.5407	0.8444	0.2	0.3735	0.0723	0.988	0.5821	0.5821	0.6068	0	0.6444	0.2232	0.5512	0.92	0.5285	0.5	124
SPACA1	Candidate gene	0.9333	0.9355	0.3704	0.8515	0	0	0.1856	0	0	0.8923	0	0	0	0	0	0	0.4946	0	0.791	0	0.637	0.8444	0.7556	0.6222	0.8	0.5407	0.6	0.5407	0.8444	0	0.5904	0.1928	0.9518	0.5821	0.5821	0.6068	0.5093	0.6444	0.8661	0.2677	0.848	0.5285	0.5	125
GJB7	Candidate gene	0.9407	0.9355	0.7852	0	0.6	0.5667	0.1856	0	0	0.9308	0.7692	0.6857	0	0	0.6216	0	0	0	0	0	0.637	0.8444	0.7556	0.6222	0.8	0.5407	0.6	0.037	0.8444	0	0	0	0	0.5821	0.0746	0.6068	0.5093	0.1704	0.9464	0.9685	0.832	0.5285	0.5	126
TMEM132E	Candidate gene	0.9481	0.9355	0.4	0	0.6	0	0.1856	0	0	0.9692	0	0	0	0	0	0	0.3441	0	0	0	0.637	0.8444	0.7556	0.6222	0.8	0.5407	0.6	0.5407	0.8444	0	0	0	0	0.5821	0.5821	0.6068	0.5093	0.6444	0.9821	0.0866	0.424	0.5285	0.5	127
SYCP2	Candidate gene	0.9556	0.5	0.7852	0.5644	0.6	0	0	0	0	0.2923	0.7692	0	0	0	0.6216	0	0.8817	0	0.9254	0	0.637	0.8444	0.7556	0.6222	0.8	0.5407	0.6	0.5407	0.8444	0.9091	0.5663	0.9518	0.7952	0.5821	0.5821	0.6068	0.5093	0.1407	0	0.9449	0.808	0.5285	0.5	128
TEX12	Candidate gene	0.963	0.9355	0.7852	0.8218	0	0.5667	0	0	0	0.9154	0.7692	0	0	0	0	0	0	0	0.8955	0	0.637	0.8444	0.7556	0.6222	0.8	0.5407	0.6	0.5407	0.8444	0	0.7349	0.0361	0.7711	0.5821	0.5821	0.6068	0	0.6444	0.7411	0.9764	0.768	0.5285	0.5	129
CCDC129	Candidate gene	0.9704	0	0.7852	0	0	0.5667	0.4021	0	0	0	0	0	0	0	0	0	0.6882	0	0	0	0.637	0.8444	0.7556	0.6222	0.8	0.5407	0.6	0.5407	0.8444	0	0	0	0	0.5821	0.5821	0.6068	0.5093	0.1333	0.9375	0.9449	0.952	0.5285	0.5	130
SERTM1	Candidate gene	0.9778	0.9355	0.7852	0.5248	0	0	0.9794	0	0	0	0	0	0	0	0	0	0	0	0	0	0.637	0.1407	0.7556	0.6222	0.8	0.5407	0.6	0.5407	0.1407	0	0	0	0	0.5821	0.5821	0	0.5093	0.6444	0	0.8819	0	0	0.5	131
DEPDC4	Candidate gene	0.9852	0.7419	0.7852	0	0.6	0.5667	0	0	0	0.9692	0	0	0	0	0	0	0	0	0	0	0.637	0.8444	0.7556	0.6222	0.8	0.5407	0.6	0.5407	0.8444	0	0	0	0	0.5821	0.5821	0.6068	0.5093	0.6444	0.8393	0.9843	0.896	0.5285	0.5	132
OR6A2	Candidate gene	0.9926	0.621	0.7852	0.9802	0.6	0.5667	0.1856	0	0	0.9692	0.3654	0.6857	0	0	0.6216	0.6531	0	0	0	0	0.637	0.8444	0.7556	0.6222	0.8	0.5407	0.6	0.5407	0.8444	0	0	0	0	0.5821	0	0	0	0.6444	0.7768	1	0.68	0	0.5	133
C6orf163	Candidate gene	1	0.9355	0.7852	0	0	0	0.7423	0	0	0	0	0	0	0	0	0	0	0	0	0	0.637	0.8444	0.7556	0.6222	0.8	0.5407	0.6	0.5407	0.8444	0	0	0	0	0.5821	0.5821	0.6068	0	0.6444	0	0	1	0	0.5	134

## Sheet: Halter_Metabolism
Gene name	Group	P-value	Annotation â€“ Gene Ontology	Annotation â€“ UniProt	Text-mining	Annotation â€“ InterPro	Annotation â€“ Pfam	Annotation â€“ SIMAP (localization)	Annotation â€“ DrugBank	Annotation â€“ Stitch	Annotation â€“ RGD ChEBI	Annotation â€“ Reactome	Annotation â€“ WikiPathways	Annotation â€“ RGD pathways	Annotation â€“ BioCarta	Annotation â€“ CPDB	Annotation â€“ hiPathDB	Annotation â€“ GAD	Annotation â€“ OMIM	Annotation â€“ RGD MP	Annotation â€“ RGD RDO	Interaction â€“ String	Interaction â€“ BioGrid	Interaction â€“ I2D	Interaction â€“ IntAct	Interaction â€“ iRefIndex	Interaction â€“ Mint	Interaction â€“ HPRD	Interaction â€“ MIPS	Interaction â€“ GeneRIF	Expression â€“ Su et al (2002)	Expression â€“ Su et al (2004)	Expression â€“ CMAP	Expression â€“ Lukk et al	Annotation â€“ PaGenBase	Annotation â€“ CGAP	Annotation â€“ GNF	Annotation â€“ eGenetics	Blast	Precalculated â€“ Ouzounis	Precalculated â€“ Prospectr	Precalculated â€“ HaploPred	Annotation â€“ Aura	Annotation â€“ mirZ	id
APOA2	Training gene	0.0106	0.0114	0.0319	0.0137	0.0667	0.0465	0.2639	0	0.0182	0.0109	0.0294	0.1	0.0313	0.0294	0.0526	0.0227	0.0781	0.2222	0.0345	0.0313	0.0319	0.0638	0.0532	0.0532	0.0638	0.0426	0.0532	0.5319	0.0638	0	0.0435	0.029	0.0435	0.0109	0.0106	0.0476	0	0.117	0.075	0.0222	0.2048	0	0.5	0
APOE	Training gene	0.0213	0.0227	0.0106	0.0274	0.0111	0.0116	0.5278	0.4	0.0545	0.0217	0.0882	0.0333	0.0938	0.0882	0.0175	0.0909	0.0469	0.037	0.0517	0.0938	0.0319	0.0638	0.0532	0.0532	0.0638	0.0426	0.0532	0.0213	0.0638	0.0185	0.029	0.1159	0.029	0.0435	0.0319	0.0357	0.5068	0.0532	0.1375	0.8889	0.5783	0.525	0.5	1
INSR	Training gene	0.0319	0.0682	0.0851	0.0822	0.1	0.0698	0.2639	0.1	0.1818	0.1413	0.2353	0.1667	1	0.1176	0.1579	0.1136	0.0625	0.1111	0.1379	0.25	0.1277	0.0638	0.0532	0.0532	0.0638	0.0426	0.0532	0.0213	0.0638	0.1111	0.2319	0.3043	0.058	0.2717	0.0638	0.3095	0.5068	0.0532	0.0375	0.1	0.012	0.0125	0.5	2
PPARA	Training gene	0.0426	0.0455	0.3936	0.0685	0.0778	0.1163	0	0.2	0.0909	0.0652	0.1176	0.2333	0.4375	0.1471	0.1053	0.0682	0.0313	0.3704	0.0172	0.0625	0.0106	0.0638	0.0532	0.0532	0.0638	0.0426	0.0532	0.5319	0.0638	0.0741	0.1014	0.1594	0.1014	0.6413	0.1277	0.25	0.0137	0.0532	0	0.0556	0.5542	0.025	0.5	3
APOA5	Training gene	0.0532	0.0341	0.0213	0	0.0111	0.0116	0.5278	0	0.0364	0.163	0.0588	0.0667	0.0313	0.0294	0.0351	0.0455	0.0156	0.1852	0.069	0.125	0.0106	0.0638	0.7234	0.0532	0.0638	0.5532	0.617	0.0213	0.0638	0	0	0	0	0.0652	0.0638	0.0119	0.5068	0.0532	0.5375	0.3111	0.5904	0	0.5	4
TF	Training gene	0.0638	0.3409	0.1489	0.1096	0.0556	0.093	0.2639	0.3	0.2727	0.0978	0.5	0.2	0.9063	0.2059	0.1404	0.2273	0.1563	0.4074	0.2241	0.2188	0.0957	0.0638	0.0532	0.0532	0.0638	0.0426	0.0532	0.5319	0.0638	0.037	0.0145	0.0145	0.0145	0.0217	0.0532	0.0238	0.5068	0.0532	0.175	0.1	0.2169	0.525	0.5	5
BDNF	Training gene	0.0745	0.0909	0.0426	0.0548	0.0333	0.0814	0.2639	0	0.1455	0.1196	0	0.2667	0.8438	0.2353	0.193	0.1591	0.1094	0.0741	0.1724	0.3438	0.1383	0.0638	0.0532	0.0532	0.0638	0.0426	0.0532	0.5319	0.0638	0.0926	0.1449	0.1449	0.1159	0.2609	0.5745	0.25	0.5068	0.0532	0.05	0.5667	0.1084	0.525	0.5	6
ZFHX3	Training gene	0.0851	0.2841	0.5106	0.0411	0.1778	0.1047	0.8194	0	0.3455	0.2065	0	0	0	0.1765	0.2632	0.1818	0.2344	0.3333	0.2931	0.75	0.6596	0.0638	0.0532	0.0532	0.0638	0.0426	0.0532	0.5319	0.0638	0	0	0	0	0.1087	0.1064	0.0714	0.5068	0.0532	0.275	0.0556	0.1446	0.0375	0.5	7
NLRP3	Training gene	0.0957	0.1023	0.0638	0	0.0889	0.0581	0.0278	0	0.1636	0.2935	0.2059	0.4	0.875	0	0.2982	0.25	0.1875	0.1481	0.1034	0.5	0.6596	0.0638	0.0532	0.0532	0.0638	0.5532	0.0532	0.5319	0.0638	0.1481	0.3768	0.1014	0.0725	0.1739	0.5745	0.6548	0.5068	0.0532	0.25	0.6	0.494	0.525	0.5	8
GHRL	Training gene	0.1064	0.0568	0.0532	0.1233	0.0444	0.0349	0.2639	0	0.2909	0.0326	0.1765	0	0.5313	0	0.2105	0.2045	0.0938	0.2963	0.5517	0.1875	0.1489	0.0638	0.0532	0.617	0.0638	0.5532	0.0532	0.5319	0.0638	0	0	0	0	0.6413	0.5745	0	0.5068	0.1064	0.1125	0.5333	0.9157	0.525	0.5	9
NR0B2	Candidate gene	0.117	0.125	0.2021	0.1918	0.1111	0.1395	0.2639	0	0.0727	0.1304	0.4706	0.7	0.1875	0.6176	0.1228	0.1364	0.2188	0.4444	0.2414	0.375	0.0532	0.5638	0.234	0.1702	0.3723	0.5532	0.2021	0.5319	0.5213	0.0556	0.5072	0.1884	0.1594	0.0326	0.5745	0.119	0.5068	0.617	0.125	0.6889	0.1687	0.525	0.5	10
PLAGL1	Training gene	0.1277	0.3295	0.6064	0.0959	0.1556	0.1279	0	0	0	0.1087	0	0	0	0	0	0	0.2813	0.2593	0.431	0	0.6596	0.0638	0.0532	0.617	0.0638	0.0426	0.0532	0.5319	0.0638	0.1296	0.1739	0.1304	0.087	0.1848	0.5745	0.6548	0.5068	0.0532	0.225	0.6	0.7108	0.525	0.5	11
NFIC	Candidate gene	0.1383	0.3182	0.5532	0.2329	0.6	0.593	0	0	0.7636	0.3804	0	0	0.6875	0.6176	0.6491	0.6364	0.75	0	0.6379	0	0.1596	0.2447	0.3085	0.617	0.2979	0.5532	0.617	0.5319	0.2553	0.2593	0.5942	0.8116	0.4928	0.2174	0.5745	0.1786	0.5068	0.617	0.025	0.1778	0.3614	0.525	0.5	12
PECAM1	Candidate gene	0.1489	0.3977	0.1596	0.1507	0	0.593	0.2639	0	0	0.1957	0	0	0.4375	0.6176	0.2807	0.6364	0.1406	0	0.7414	0.2813	0.6596	0.2766	0.7234	0.617	0.1809	0.5532	0.117	0.5319	0.2979	0	0	0	0	0.1304	0.5745	0	0	0.617	0	0	0.6265	0.525	0.5	13
CBX1	Candidate gene	0.1596	0.6023	0.266	0.6027	0.6	0.593	0	0	0.7636	0.6413	0	0	0	0	0	0	0	0	0.5345	0	0.6596	0.6383	0.4468	0.617	0.5851	0.5532	0.617	0.5319	0.6809	0.2407	0.7101	0.2174	0.2609	0.6413	0.5745	0.6548	0.5068	0.617	0.6125	0.3778	0.6867	0.525	0.5	14
CNTNAP2	Candidate gene	0.1702	0.5909	0.5319	0.274	0.6	0.593	0.2639	0	0.7636	0.7609	0	0	0	0	0.6491	0.6364	0.2031	0.7407	0.5172	0.7813	0.6596	0.5426	0.7234	0.617	0.4362	0.5532	0.617	0.5319	0.5426	0.7407	0.5507	0.3188	0.3043	0.6413	0.5745	0.6548	0.5068	0.617	0.4125	0.6778	0.3494	0.525	0.5	15
KIFC3	Candidate gene	0.1809	0.7386	0.3298	0.5616	0.6	0.593	0.5278	0	0.4727	0.7065	0.7647	0	0.3125	0.6176	0.6491	0.6364	0.6563	0	0	0	0.6596	0.383	0.4149	0.617	0.7979	0.5532	0.617	0.5319	0.3723	0.5556	0.4493	0.7246	0.5362	0.0652	0.1277	0.6548	0	0.617	0.375	0.1778	0.6024	0.525	0.5	16
FGR	Candidate gene	0.1915	0.1477	0.4468	0.3973	0.1667	0.186	0	0	0.1091	0.25	0.7647	0.7	0.3125	0	0.6491	0.2727	0.5781	0	0.9138	0	0.1702	0.4574	0.2766	0.617	0.2021	0.5532	0.1383	0.5319	0.3191	0.7963	0.8406	0.3913	0.1739	0.1304	0.5745	0.6548	0	0.1277	0.35	0.1778	0.3253	0.525	0.5	17
MYH11	Candidate gene	0.2021	0.5455	0.4149	0.2603	0.6	0.593	0.8194	0.7	0.4727	0.1522	0.7647	0	0.4375	0.6176	0.6491	0.6364	0.7344	0.7407	0.1897	0.6875	0.2128	0.266	0.1277	0.1489	0.1596	0.5532	0.617	0.5319	0.2872	0.7778	0.8986	0.0435	0.5652	0.6413	0.0851	0.2024	0.5068	0.617	0.1	0.0556	0.1205	0.525	0.5	18
AATF	Candidate gene	0.2128	0.2727	0.8191	0.3562	0.6	0.593	0	0	0	0.8913	0.3529	0	0	0.6176	0.6491	0.6364	0.4219	0	0.5	0	0.117	0.5106	0.2872	0.1809	0.3404	0.5532	0.2021	0.5319	0.4787	0.4259	0	0	0	0.6413	0.5745	0	0.5068	0.617	0.6375	0.4444	0.1566	0.525	0.5	19
ALCAM	Candidate gene	0.2234	0.5795	0.2234	0.5205	0.6	0.593	0.2639	0	0.7636	0.4348	0.7647	0	0	0.6176	0.6491	0.6364	0.5156	0	0.9828	0	0.6596	0.3404	0.2128	0.617	0.3298	0.5532	0.617	0.5319	0.4362	0.5185	0.5652	0.6812	0.4493	0.6413	0.5745	0.25	0.5068	0.617	0.0875	0.3111	0.1928	0.525	0.5	20
SLC9A1	Candidate gene	0.234	0.1818	0.4787	0.589	0.6	0.593	0.5278	0.7	0.2182	0.2391	0.2647	0.7	0.3125	0.6176	0.6491	0.6364	0.6875	0	0.2069	0.4063	0.6596	0.3191	0.1596	0.617	0.1702	0.5532	0.1702	0.5319	0.2021	0.6852	0.7681	0.942	0.8841	0.6413	0.5745	0.6548	0.5068	0.617	0.1625	0.1	0.4217	0.525	0.5	21
RPA2	Candidate gene	0.2447	0.5	0.266	0.4932	0.6	0.593	0.6528	0	0.7636	0.5435	0.7647	0.7	0.1875	0.6176	0.6491	0.6364	0.7656	0	0	0	0.6596	0.6702	0.383	0.2234	0.5426	0.5532	0.617	0.5319	0.6702	0.6296	0.6232	0.2609	0.3333	0.2174	0.5745	0.6548	0	0.617	0.9	0.4444	0.0602	0.525	0.5	22
PDS5B	Candidate gene	0.2553	0.7727	0.8191	0.6712	0.6	0	0	0	0.7636	0.6304	0.7647	0	0	0	0.6491	0	0.6094	0	0.3448	0	0.6596	0.3723	0.2553	0.1596	0.383	0.5532	0.617	0.5319	0.4043	0.4444	0.2174	0.2754	0.5217	0.6413	0.5745	0.6548	0.5068	0.1596	0.4625	0.6556	0.3373	0.525	0.5	23
SRPK1	Candidate gene	0.266	0.4205	0.266	0.7671	0.1333	0.593	0.8194	0	0.4727	0.413	0	0.7	0	0	0.6491	0	0.9531	0	0	0	0.6596	0.4894	0.2447	0.234	0.5	0.5532	0.617	0.5319	0.5	0.3333	0.3333	0.2899	0.2754	0.6413	0.0319	0.1548	0.5068	0.617	0.55	0.1778	0.4458	0.525	0.5	24
NF1	Candidate gene	0.2766	0.1364	0.2021	0.2466	0.6	0.593	0.8194	0	0.7636	0.5761	0	0.3	0.6875	0.6176	0.6491	0.6364	0.3281	0.7407	0.3793	0.4688	0.2447	0.2234	0.1702	0.617	0.2872	0.5532	0.1596	0.5319	0.3085	0.6667	0.058	0.8551	0.971	0.6413	0.5745	0.6548	0.5068	0.617	0	0.0111	0.2892	0.525	0.5	25
NUDC	Candidate gene	0.2872	0.6818	0.3298	0.6986	0.6	0.593	0.8194	0	0.7636	0.4565	0.7647	0	0.1875	0.6176	0.6491	0.6364	0	0	0	0	0.6596	0.6277	0.2021	0.2128	0.5745	0.5532	0.617	0.5319	0.6489	0	0	0	0	0.6413	0.5745	0	0.5068	0.617	0.7625	0.2778	0.4337	0.525	0.5	26
MTHFD1L	Candidate gene	0.2979	0.8409	0.5638	0.1644	0.6	0.593	0.2639	0	0.7636	0.4783	0	0.7	0.1875	0	0.6491	0.6364	0.25	0	0.569	0	0.3191	0.4043	0.4255	0.1277	0.3511	0.5532	0.617	0.5319	0.383	0	0	0	0	0.6413	0.5745	0.25	0	0.617	0.2125	0.1778	0.9036	0.525	0.5	27
WDTC1	Candidate gene	0.3085	0.2273	0.3298	0.4384	0.6	0.593	0.6528	0	0	0.2826	0	0	0	0	0	0	0.4844	0	0.1207	0	0.234	0.6489	0.7234	0.617	0.4681	0.5532	0.617	0.5319	0.6277	0.5926	0.1594	0.9565	0.5072	0.6413	0.1277	0.6548	0.5068	0.617	0.8375	0.7444	0.0241	0.525	0.5	28
WASF2	Candidate gene	0.3191	0.4773	0.3298	0.8356	0.6	0.593	0.6528	0	0.7636	0.7935	0.7647	0.7	0.5625	0.6176	0.6491	0.6364	0.5	0	0.2586	0	0.2234	0.5106	0.3404	0.617	0.4787	0.5532	0.617	0.5319	0.5745	0	0.913	0.6232	0.2029	0.6413	0.5745	0.6548	0	0.617	0.3875	0.5	0.3855	0.525	0.5	29
APPBP2	Candidate gene	0.3298	0.5568	0.6277	0.9452	0.6	0.593	0	0	0	0.4891	0	0	0	0.6176	0.6491	0.6364	0.5625	0	0	0	0.6596	0.6064	0.3085	0.617	0.4574	0.0957	0.234	0.5319	0.617	0.8889	0.3188	0.2029	0.7826	0.2174	0.5745	0.2976	0.5068	0.617	0.6875	0.3889	0.1325	0.525	0.5	30
CACNA2D1	Candidate gene	0.3404	0.5114	0.5851	0.5479	0.6	0.593	0.2639	0.7	0.2545	0.2717	0	0.7	0.5625	0	0.6491	0.6364	0.3125	0	0.8276	0	0.6596	0.8404	0.1489	0.617	0.7979	0.5532	0.617	0.5319	0.8404	0.8519	0.1159	0.5652	0.7536	0.6413	0.5745	0.6548	0.5068	0.1915	0.5625	0.1	0.506	0.525	0.5	31
TIMP2	Candidate gene	0.3511	0.2045	0.117	0.3151	0.6	0.593	0.2639	0	0.3818	0.0435	0.7647	0.7	0	0.6176	0.6491	0.6364	0.1719	0	0.6897	0.3125	0.2021	0.8404	0.7234	0.617	0.7979	0.5532	0.617	0.5319	0.8404	0.7222	0.8261	0.913	0.4058	0.163	0.0319	0.0833	0.5068	0.617	0.15	0.2556	0.5663	0.525	0.5	32
CLPS	Candidate gene	0.3617	0.7045	0.234	0.3425	0.6	0.593	0.2639	0.7	0.1273	0.7174	0.1471	0	0	0.6176	0.0702	0.6364	0.2656	0	0.0862	0.4375	0.2979	0.8404	0.7234	0.617	0.7979	0.5532	0.617	0.5319	0.8404	0.2222	0.9565	0.2464	0.6232	0.6413	0.0957	0.1548	0.5068	0.1702	0.7875	0.5333	0.5301	0	0.5	33
EMX2	Candidate gene	0.3723	0.4545	0.8191	0.3014	0.1889	0.1512	0.6528	0	0.7636	0.5326	0	0	0	0	0	0	0.3438	0.7407	0.8103	0.8125	0.266	0.8404	0.7234	0.617	0.7979	0.5532	0.617	0.5319	0.8404	0.5741	0.8841	0.0725	0.4348	0.6413	0.5745	0.1905	0	0.617	0.0125	0.7222	0.0361	0.525	0.5	34
FZR1	Candidate gene	0.383	0.25	0.8191	0.6849	0.6	0.593	0	0	0.4727	0.337	0.7647	0	0.1875	0.6176	0.6491	0.6364	0.8594	0	0.2759	0	0.6596	0.5851	0.4362	0.1915	0.5319	0.5532	0.617	0.5319	0.6064	0.5	0.3043	1	0.7681	0.6413	0.5745	0.6548	0.5068	0.617	0.2625	0.2222	0.0482	0.525	0.5	35
LHX1	Candidate gene	0.3936	0.1932	0.8191	0.7397	0.1889	0.1512	0.6528	0	0	0.8478	0	0.7	0	0	0.6491	0	0	0	0.4483	0	0.6596	0.8404	0.7234	0.617	0.7979	0.5532	0.617	0.5319	0.8404	0.7037	0.7536	0.6087	0.6522	0.6413	0.5745	0.6548	0.5068	0.1383	0.2	0.0333	0.0964	0.525	0.5	36
RCC1	Candidate gene	0.4043	0.7159	0.266	0.7808	0.6	0.593	0.2639	0	0.7636	0.3478	0.7647	0	0	0.6176	0.6491	0.6364	0	0	0	0	0.6596	0.5957	0.4043	0.1383	0.5213	0.1064	0.617	0.5319	0.6383	0.2963	0.4783	0.8841	0.3768	0.6413	0.5745	0.6548	0	0.617	0.85	0.4444	0	0.525	0.5	37
PML	Candidate gene	0.4149	0.1136	0.3936	0.2055	0.6	0.593	0.9444	0	0.7636	0.1739	0.7647	0.7	0.9375	0.6176	0.2281	0.6364	0.5469	0.7407	0.7759	0	0.1064	0.4362	0.1915	0.2021	0.3085	0.5532	0.2234	0.5319	0.4149	0.2037	0.0725	0.4783	0.3188	0.6413	0.5745	0.6548	0.5068	0.617	0.0625	0.8222	0.7952	0.525	0.5	38
CCL2	Candidate gene	0.4255	0.0795	0.117	0.137	0.6	0.593	0.2639	0.7	0.4	0.0761	0.3529	0.1333	0.9688	0.6176	0.0877	0.6364	0.125	0.7407	0	0.1563	0.0745	0.8404	0.7234	0.617	0.5638	0.5532	0.617	0.5319	0.8404	0.9074	1	0.3768	0.6087	0.6413	0.5745	0.2143	0.5068	0.617	0	0.2556	0.3855	0.525	0.5	39
PPM1D	Candidate gene	0.4362	0.7841	0.8191	0.4247	0.6	0.593	0	0	0.7636	0.4022	0	0	0.6875	0.6176	0.6491	0.6364	0.9531	0.7407	0.4828	0.9375	0.6596	0.4681	0.2872	0.617	0.4043	0.5532	0.1702	0.0426	0.5426	0.463	0.2029	0.3333	0.5797	0.6413	0.5745	0.6548	0.5068	0.617	0.2375	0.4444	0.2289	0.525	0.5	40
SESN2	Candidate gene	0.4468	0.7614	0.8191	0.8767	0.6	0.593	0.8194	0	0.7636	0.1848	0	0	0.6875	0	0.6491	0.6364	0	0	0.4138	0	0.6596	0.5319	0.7234	0.617	0.2447	0.5532	0.617	0.5319	0.4894	0	0	0	0	0.6413	0.5745	0.119	0.5068	0.617	0.3625	0.1778	0.3133	0.525	0.5	41
PTAFR	Candidate gene	0.4574	0.3864	0.3298	0.3288	0.6	0.593	0.2639	0	0.2364	0.5543	0.3529	0.7	0.4375	0.6176	0.6491	0.6364	0.7031	0	0.9655	0.6563	0.0851	0.4787	0.2553	0.617	0.1809	0.5532	0.617	0.5319	0.2234	0.8148	0.2464	0.4638	0.3913	0.1304	0.5745	0.6548	0.5068	0.617	0.9125	0.9667	0.8193	0	0.5	42
STIM2	Candidate gene	0.4681	0.3068	0.2447	0.7534	0.6	0.593	0.5278	0	0.7636	0.3043	0	0	0.625	0	0.6491	0	0.4375	0	0.3103	0	0.6596	0.4468	0.117	0.617	0.1383	0.5532	0.1489	0.5319	0.2128	0	0	0	0	0.6413	0.5745	0.6548	0.5068	0.617	0.95	0.9222	0.747	0.525	0.5	43
GGNBP2	Candidate gene	0.4787	0.6818	0.8191	0.4521	0.6	0	0	0	0	0.3152	0	0	0	0	0	0	0	0	0	0	0.6596	0.1702	0.7234	0.617	0.2447	0.5532	0.617	0.5319	0.2553	0	0	0	0	0.6413	0.5745	0	0	0.617	0	0	0.4699	0.525	0.5	44
CA4	Candidate gene	0.4894	0.2159	0.0745	0.6438	0.6	0.593	0.2639	0.7	0.7636	0.5	0.2647	0	0	0	0.6491	0.6364	0.8281	0.7407	0.1552	0.8438	0.1702	0.3404	0.7234	0.617	0.7979	0.5532	0.617	0.5319	0.4362	0.3519	0.8696	0.5362	0.8116	0.6413	0.5745	0.6548	0.5068	0.617	0.725	0.1	0.8916	0.525	0.5	45
TBC1D21	Candidate gene	0.5	0.5227	0.8191	0	0.6	0.593	0	0	0	0.587	0	0	0	0	0	0	0	0	0	0	0.6596	0.1702	0.7234	0.617	0.7979	0.5532	0.617	0.5319	0.1489	0	0	0	0	0.6413	0.5745	0.6548	0.5068	0.617	0.625	0.8222	0.6506	0.525	0.5	46
MED18	Candidate gene	0.5106	0.6591	0.6064	0	0.6	0.593	0.6528	0	0	0.5978	0.7647	0	0	0	0.6491	0	0	0	0.7931	0	0.0638	0.617	0.3298	0.617	0.4787	0.5532	0.617	0.5319	0.5957	0	0.5217	0.6522	0.8551	0.087	0.5745	0.6548	0	0.617	0.8	0.3556	0.9518	0.525	0.5	47
FCN3	Candidate gene	0.5213	0.75	0.117	0.6575	0.6	0.593	0.2639	0	0.7636	0	0	0	0	0	0	0	0.7813	0.7407	0	0.875	0.6596	0.8404	0.7234	0.617	0.7979	0.5532	0.617	0.5319	0.8404	0.1852	0.3478	0.1739	0.5507	0.0652	0.5745	0.0476	0.5068	0.617	0.7375	0.6444	0.8675	0.525	0.5	48
FAM46B	Candidate gene	0.5319	0	0.8191	0	0.6	0.593	0.0278	0	0	0.5109	0	0	0	0	0	0	0	0	0	0	0.2872	0.8404	0.7234	0.617	0.7979	0.5532	0.617	0.5319	0.8404	0	0	0	0	0.6413	0.5745	0.6548	0.5068	0.617	0.525	0.1778	0.2771	0	0.5	49
STX12	Candidate gene	0.5426	0.2614	0.4787	0.8904	0.6	0.593	0.8194	0	0	0.6739	0.7647	0	0	0	0.6491	0	0	0	0	0	0.6596	0.4043	0.3617	0.617	0.5106	0.5532	0.617	0.5319	0.4362	0.6481	0.7826	0.2319	0.3478	0.6413	0.5745	0.6548	0	0.617	0.875	0.7667	0.3012	0.525	0.5	50
NDE1	Candidate gene	0.5532	0.4659	0.4468	0.5342	0.6	0.593	0.8194	0	0.4727	0.2174	0.7647	0	0	0.6176	0.6491	0.6364	0.8906	0.7407	0.8448	0	0.6596	0.8404	0.3723	0.617	0.4362	0.5532	0.1915	0.5319	0.5106	0	0.6522	0.8986	0.6812	0.6413	0.5745	0.6548	0.5068	0.617	0.8625	0.4444	0.3735	0.525	0.5	51
PLN	Candidate gene	0.5638	0.2386	0.2021	0.6301	0.6	0.593	0.6528	0	0.4182	0.0543	0	0.7	0.7813	0.6176	0.2281	0.6364	0.3906	0.7407	0.6034	0.625	0.2766	0.8404	0.7234	0.617	0.7979	0.5532	0.617	0.5319	0.8404	0.9444	0.6087	0.087	0.7391	0.2174	0.5745	0.6548	0.5068	0.617	0	0.9	0.253	0.525	0.5	52
SNX11	Candidate gene	0.5745	0.5682	0.6277	0	0.6	0.593	0	0	0	0.9565	0	0	0	0	0	0	0	0	0	0	0.6596	0.1702	0.7234	0.617	0.1277	0.5532	0.617	0.5319	0.1489	0	0.3913	0.5942	0.8406	0.6413	0.5745	0.6548	0.5068	0.2234	0.475	0.4444	0.8795	0.525	0.5	53
GPN2	Candidate gene	0.5851	0.8295	0.8191	0	0.6	0.593	0	0	0	0.837	0	0	0	0	0	0	0	0	0	0	0.6596	0.1702	0.7234	0.617	0.7979	0.5532	0.617	0.5319	0.1489	0	0.8116	0.6957	0.3623	0.6413	0.5745	0.6548	0	0.617	0.5	0.2778	0.8072	0.525	0.5	54
LHFPL5	Candidate gene	0.5957	0.625	0.4149	0	0.6	0.593	0.0278	0	0.7636	0.7717	0	0	0	0	0	0	0	0.7407	0.8966	0.5938	0.6596	0.8404	0.7234	0.617	0.7979	0.5532	0.617	0.5319	0.8404	0	0	0	0	0.6413	0.5745	0.6548	0.5068	0.617	0	0.3333	0.7711	0	0.5	55
KAZN	Candidate gene	0.6064	0.6136	0.8191	0.8082	0.6	0.593	0.9444	0	0	0.4674	0	0	0	0	0	0	0.4063	0	1	0	0.6596	0.234	0.7234	0.617	0.2447	0.5532	0.617	0.5319	0.234	0.4074	0.5362	0.5797	0.1304	0.2174	0.5745	0.6548	0.5068	0.617	0	0.3333	0	0	0.5	56
CDC42EP4	Candidate gene	0.617	0.375	0.8191	0	0.6	0.593	0.6528	0	0	0.5652	0	0	0	0	0	0	0	0	0	0	0.6596	0.2872	0.7234	0.617	0.3511	0.5532	0.617	0.5319	0.3298	1	0.1884	0.8406	0.1449	0.2174	0.5745	0.25	0.5068	0.1809	0.675	0.8222	0.7349	0.525	0.5	57
GRHL3	Candidate gene	0.6277	0.1705	0.8191	0.7123	0.6	0.593	0.2639	0	0.7636	0.8913	0	0	0	0	0	0	0	0	0.3621	0	0.6596	0.8404	0.7234	0.617	0.7979	0.5532	0.617	0.5319	0.8404	0	0	0	0	0.6413	0.5745	0.6548	0.5068	0.617	0.575	0.6	0.6988	0.525	0.5	58
GINS3	Candidate gene	0.6383	0.9432	0.3298	0.863	0.6	0.593	0	0	0.7636	0.2283	0	0	0	0	0	0	0.7188	0	0	0	0.6596	0.6596	0.7234	0.617	0.4043	0.5532	0.617	0.5319	0.6596	0	0.7391	0.6377	0.4783	0.6413	0.5745	0.6548	0.5068	0.617	0.4375	0.9444	0.6386	0.525	0.5	59
UPK3A	Candidate gene	0.6489	0.2955	0.383	0.726	0.6	0	0.2639	0	0.7636	0.7283	0	0	0	0	0	0	0.3594	0.7407	0.5862	0.5625	0.6596	0.8404	0.7234	0.617	0.7979	0.5532	0.617	0.5319	0.8404	0.1667	0.7971	0.3478	0.8696	0.6413	0.5745	0.6548	0.5068	0.617	0.775	0.3111	0.9277	0.525	0.5	60
WNT7B	Candidate gene	0.6596	0.1591	0.1702	0.8219	0.6	0.593	0.2639	0	0.3455	0.7391	0.3529	0.3667	0.7813	0.6176	0.1754	0.6364	0.9531	0	0.6724	0.7188	0.6596	0.8404	0.7234	0.617	0.7979	0.5532	0.617	0.5319	0.8404	0	0.6667	0.9275	0.6377	0.6413	0.5745	0.0833	0.5068	0.617	0	0.2222	0	0.525	0.5	61
MAP3K6	Candidate gene	0.6702	0.4318	0.8191	0.3699	0.1333	0.593	0.9444	0	0	0.4457	0	0.3333	0.3125	0.6176	0.6491	0.6364	0.8125	0	0.6207	0	0.6596	0.2979	0.3511	0.617	0.383	0.5532	0.617	0.5319	0.3404	0	0.942	0.971	0.8986	0.6413	0.5745	0.2857	0.5068	0.617	0.5125	0.6	0.7831	0.525	0.5	62
CCL13	Candidate gene	0.6809	0.4091	0.117	0.2192	0.6	0.593	0.2639	0	0.2	0.75	0	0	0	0	0.6491	0.6364	0.7969	0	0.3276	0	0.1915	0.4043	0.7234	0.617	0.7979	0.5532	0.617	0.5319	0.5638	0.3704	0.4348	0.4058	1	0.6413	0.5745	0.6548	0.5068	0.617	1	0.2556	0.988	0.525	0.5	63
BCAS3	Candidate gene	0.6915	0.7955	0.8191	0.5753	0.6	0.593	0.8194	0	0.3455	0.3587	0	0	0	0	0	0	0.4531	0	0	0.9375	0.6596	0.1702	0.7234	0.617	0.2447	0.5532	0.617	0.5319	0.1489	0	0.4203	0.8261	0.913	0.6413	0.5745	0.6548	0	0.2128	0.7	0.7444	0.2651	0.525	0.5	64
GGNBP2	Candidate gene	0.7021	0.6818	0.8191	0.4521	0.6	0	0.8194	0	0	0.3152	0	0	0	0	0	0	0	0	0	0	0.6596	0.1702	0.7234	0.617	0.2447	0.5532	0.617	0.5319	0.2553	0	0.6957	0.3623	0.9275	0.6413	0.5745	0.6548	0.5068	0.617	0.2875	0.9778	0.4699	0.525	0.5	65
SRRM3	Candidate gene	0.7128	0	0.8191	0	0.6	0.593	0.6528	0	0	0.6087	0	0	0	0	0	0	0	0	0	0	0.6596	0.8404	0.7234	0.617	0.7979	0.5532	0.617	0.5319	0.8404	0	0	0	0	0.6413	0.5745	0	0	0.617	0	0	0	0.525	0.5	66
PTPN18	Candidate gene	0.7234	0.9432	0.3298	0.7945	0.6	0.593	0.6528	0	0.7636	0.8587	0	0.7	0	0	0.6491	0	0	0	0	0	0.6596	0.3404	0.1809	0.1064	0.2447	0.5532	0.1277	0.5319	0.2553	0.8704	0.2609	0.7681	0.2319	0.1304	0.5745	0.6548	0.5068	0.617	0.65	0.8222	0.9398	0.525	0.5	67
TMEM222	Candidate gene	0.734	0.9432	0.8191	0	0.6	0.593	0.9861	0	0	0.6848	0	0	0	0	0	0	0	0	0	0	0.6596	0.5745	0.7234	0.617	0.4362	0.5532	0.617	0.5319	0.5426	0	0.4058	0.4493	0.6957	0.6413	0.5745	0.119	0	0.617	0	0.3556	0	0.525	0.5	68
STPG1	Candidate gene	0.7447	0.9432	0.8191	0	0.6	0.593	0.0278	0	0	0.8043	0	0	0	0	0	0	0	0	0	0	0.6596	0.8404	0.7234	0.617	0.7979	0.5532	0.617	0.5319	0.8404	0	0	0	0	0	0.5745	0.6548	0.5068	0.617	0.45	0.8222	0	0	0.5	69
ATPIF1	Candidate gene	0.7553	0.3523	0.5638	0.411	0.6	0.593	0.5278	0	0.7636	0.3913	0	0.7	0	0	0.6491	0	0.9531	0	0.6552	0	0.6596	0.8404	0.2234	0.617	0.7979	0.5532	0.617	0.5319	0.8404	0	0.9275	0.5217	0.942	0.6413	0.5745	0.6548	0.5068	0.617	0.6	0.5333	0.747	0.525	0.5	70
ANKFN1	Candidate gene	0.766	0	0.8191	0	0.1222	0.1744	0.5278	0	0	0.7717	0	0	0	0	0	0	0.9531	0	0	0	0.6596	0.8404	0.7234	0.617	0.7979	0.5532	0.617	0.5319	0.8404	0	0	0	0	0.6413	0.5745	0.6548	0.5068	0.617	0.4	0.4444	0.4096	0.525	0.5	71
EYA3	Candidate gene	0.7766	0.3636	0.6064	0.9863	0.6	0	0	0	0.3091	0.3696	0	0	0	0	0	0	0	0	0.7069	0	0.6596	0.8404	0.7234	0.617	0.7979	0.5532	0.617	0.5319	0.8404	0.9259	0.4638	0.4348	0.4638	0.6413	0.5745	0.6548	0	0.617	0.3125	0.5	0.0843	0.525	0.5	72
DNAJC8	Candidate gene	0.7872	0.9432	0.8191	0.6164	0.6	0.593	0.8194	0	0	0.663	0.4412	0.7	0	0.6176	0.6491	0.6364	0.9531	0	0	0	0.6596	0.2979	0.7234	0.617	0.3191	0.5532	0.617	0.0532	0.3617	0	0	0	0	0.6413	0.5745	0	0.5068	0.617	0.3375	0.9111	0.8434	0.525	0.5	73
THEMIS2	Candidate gene	0.7979	0.6364	0.8191	0.3836	0.6	0.593	0	0	0	0.6522	0	0	0	0	0	0	0.8594	0	0.8448	0	0.2553	0.8404	0.7234	0.617	0.7979	0.5532	0.617	0.5319	0.8404	0.8333	0.6812	0.5507	0.2174	0	0.5745	0.6548	0.5068	0.234	0.5875	0.9444	0	0	0.5	74
GPR3	Candidate gene	0.8085	0.8182	0.4468	0.9726	0.6	0.593	0.2639	0	0	0.8261	0	0.7	0	0	0.6491	0	0.9063	0	0.3966	0	0.6596	0.4043	0.7234	0.617	0.7979	0.5532	0.617	0.5319	0.383	0.4815	0.6377	0.7971	0.7101	0.6413	0.5745	0.6548	0	0.617	0.75	0.8778	0.241	0.525	0.5	75
CHIC2	Candidate gene	0.8191	0.7955	0.4468	0.9041	0.6	0.593	0.8194	0	0.7636	0.6957	0	0	0	0	0	0	0	0.7407	0	0.9063	0.6596	0.5106	0.3936	0.617	0.5532	0.5532	0.617	0.5319	0.4574	0	0.9855	0.4928	0.2464	0.6413	0.5745	0.6548	0.5068	0.617	0	0.7222	0.1807	0.525	0.5	76
CCL1	Candidate gene	0.8298	0.5341	0.117	0.1781	0.6	0.593	0.2639	0	0.7636	0.087	0	0	0	0	0.6491	0.6364	0.2969	0	0.9483	0.5313	0.6596	0.8404	0.7234	0.617	0.7979	0.5532	0.617	0.5319	0.8404	0.2778	0.087	0.058	0.6667	0.6413	0.5745	0.6548	0.5068	0.617	0.925	0.9333	1	0.525	0.5	77
SYTL1	Candidate gene	0.8404	0.4886	0.8191	0.8493	0.6	0.593	0	0	0	0.9565	0	0	0	0	0.6491	0	0	0	0.4655	0	0.6596	0.8404	0.7234	0.617	0.7979	0.5532	0.617	0.5319	0.8404	0	0	0	0	0.6413	0.5745	0	0.5068	0.617	0.8125	0.6	0.4578	0	0.5	78
FAM118A	Candidate gene	0.8511	0.9432	0.8191	0.4795	0	0.593	0	0	0	0.8696	0	0	0	0	0	0	0.375	0	0	0	0.6596	0.8404	0.7234	0.617	0.7979	0.5532	0.617	0.5319	0.8404	0	0.1304	0.7391	0.7971	0.6413	0.5745	0.6548	0.5068	0.617	0.4875	0.8222	0.8554	0.525	0.5	79
LOXL1	Candidate gene	0.8617	0.875	0.1809	0.5068	0.6	0.593	0.2639	0	0.7636	0.4239	0.7647	0	0	0	0.6491	0	0.5313	0.7407	0.7586	1	0.3085	0.8404	0.7234	0.617	0.7979	0.5532	0.617	0.5319	0.8404	0.537	0.971	0.6667	0.2899	0.6413	0.5745	0.1429	0.5068	0.617	0.7125	0.6667	0.0723	0.525	0.5	80
CD164L2	Candidate gene	0.8723	0.9432	0.5	0	0.6	0.593	0.2639	0	0	0	0	0	0	0	0	0	0	0	0	0	0.6596	0.8404	0.7234	0.617	0.7979	0.5532	0.617	0.5319	0.8404	0	0	0	0	0.6413	0.5745	0.6548	0	0.1489	0.825	0.5333	0.6747	0	0.5	81
STOML1	Candidate gene	0.883	0.8523	0.8191	0.9589	0.6	0.593	0.2639	0	0	0.9565	0	0	0	0	0	0	0	0	0	0	0.6596	0.5426	0.7234	0.617	0.7979	0.5532	0.617	0.5319	0.4574	0.3889	0.4928	0.8696	0.1884	0.6413	0.5745	0.6548	0.5068	0.617	0.3	0.8222	0.6145	0.525	0.5	82
FAM76A	Candidate gene	0.8936	0	0.8191	0	0	0	0.9444	0	0	0.2609	0	0	0	0	0	0	0.6406	0	0	0	0.6596	0.1702	0.7234	0.617	0.7979	0.5532	0.617	0.5319	0.1489	0.963	0.3623	0.7101	0.4203	0.6413	0.5745	0.6548	0.5068	0.617	0.8875	0.4444	0.5181	0.525	0.5	83
TEKT5	Candidate gene	0.9043	0.9432	0.8191	0	0.6	0.593	0.4722	0	0	0.8696	0	0	0	0	0	0	0.5938	0	0	0	0.6596	0.8404	0.7234	0.617	0.7979	0.5532	0.617	0.5319	0.8404	0	0	0	0	0.6413	0.5745	0.6548	0.5068	0.617	0.325	0.6	0.8313	0	0.5	84
PHACTR4	Candidate gene	0.9149	0.4432	0.8191	0.9178	0.6	0.593	0	0	0	0.9565	0	0	0	0	0	0	0	0	0.931	0	0.6596	0.2553	0.1383	0.1064	0.1383	0.5532	0.617	0.5319	0.1915	0.3148	0.2899	0.5072	0.9855	0.6413	0.5745	0.6548	0	0.2021	0	0	0.9759	0.525	0.5	85
ARMC12	Candidate gene	0.9255	0	0.8191	0	0.6	0.593	0	0	0	0.9565	0	0	0	0	0	0	0.6563	0	0	0	0.6596	0.8404	0.7234	0.617	0.7979	0.5532	0.617	0.5319	0.8404	0	0	0	0	0.6413	0.5745	0.6548	0.5068	0.617	0.6625	0.8222	0	0	0.5	86
NIPAL3	Candidate gene	0.9362	0.7273	0.8191	0.9315	0.6	0.593	0.9861	0	0	0.9565	0	0	0	0	0	0	0	0	0.8793	0	0.6596	0.1702	0.7234	0.617	0.7979	0.5532	0.617	0.5319	0.1489	0.6111	0.5797	0.4203	0.7246	0.087	0.5745	0.6548	0.5068	0.617	0.1875	0.6889	0	0.525	0.5	87
IFI6	Candidate gene	0.9468	0.6477	0.5319	0.2877	0.6	0.593	0.2639	0	0	0.5217	0.7647	0.7	0	0	0.6491	0	0.8438	0	0	0	0.6596	0.1277	0.7234	0.617	0.7979	0.5532	0.617	0.5319	0.5851	0.9815	0.7246	0.9855	0.9565	0.2826	0.5745	0.6548	0.5068	0.617	0.425	0.9889	0.7108	0.525	0.5	88
TMEM132E	Candidate gene	0.9574	0.9432	0.5319	0	0.6	0	0.2639	0	0	0.9565	0	0	0	0	0	0	0.4688	0	0	0	0.6596	0.8404	0.7234	0.617	0.7979	0.5532	0.617	0.5319	0.8404	0	0	0	0	0.6413	0.5745	0.6548	0.5068	0.617	0.9625	0.1	0.5422	0.525	0.5	89
GPATCH3	Candidate gene	0.9681	0.9432	0.8191	0	0.6	0.593	0	0	0	0.8152	0	0	0	0	0	0	0	0	0	0	0.6596	0.8404	0.7234	0.617	0.7979	0.5532	0.617	0.5319	0.8404	0	0.2754	0.7826	0.5942	0.6413	0.5745	0	0.5068	0.617	0	0.4444	0.9639	0.525	0.5	90
CEP85L	Candidate gene	0.9787	0.9432	0.8191	0	0	0	0.9444	0	0	0.9565	0	0	0	0	0	0	0.625	0	0	0	0.6596	0.3404	0.7234	0.617	0.2447	0.5532	0.617	0.5319	0.3404	0	0	0	0	0.6413	0.5745	0.6548	0.5068	0.617	0.9375	0.8222	0	0	0.5	91
SRRM3	Candidate gene	0.9894	0	0.8191	0	0.6	0.593	0.6528	0	0	0.6087	0	0	0	0	0	0	0	0	0	0	0.6596	0.8404	0.7234	0.617	0.7979	0.5532	0.617	0.5319	0.8404	0	0	0	0	0.6413	0.5745	0	0.5068	0.617	0.9875	1	0	0.525	0.5	92
PLEKHM2	Candidate gene	1	0.8636	0.3298	1	0.6	0.593	0.8194	0	0	0.9565	0	0	0	0	0.6491	0	0	0	0.7241	0	0.6596	0.8404	0.7234	0.617	0.7979	0.5532	0.617	0.5319	0.8404	0.7593	0.8551	0.7536	0.8261	0.6413	0.5745	0.6548	0	0.617	0.975	0.7111	0.6627	0.525	0.5	93

## Sheet: Racing_Metabolism
Gene name	Group	P-value	Annotation â€“ Gene Ontology	Annotation â€“ UniProt	Text-mining	Annotation â€“ InterPro	Annotation â€“ Pfam	Annotation â€“ SIMAP (localization)	Annotation â€“ DrugBank	Annotation â€“ Stitch	Annotation â€“ RGD ChEBI	Annotation â€“ Reactome	Annotation â€“ WikiPathways	Annotation â€“ RGD pathways	Annotation â€“ BioCarta	Annotation â€“ CPDB	Annotation â€“ hiPathDB	Annotation â€“ GAD	Annotation â€“ OMIM	Annotation â€“ RGD MP	Annotation â€“ RGD RDO	Interaction â€“ String	Interaction â€“ BioGrid	Interaction â€“ I2D	Interaction â€“ IntAct	Interaction â€“ iRefIndex	Interaction â€“ Mint	Interaction â€“ HPRD	Interaction â€“ MIPS	Interaction â€“ GeneRIF	Expression â€“ Su et al (2002)	Expression â€“ Su et al (2004)	Expression â€“ CMAP	Expression â€“ Lukk et al	Annotation â€“ PaGenBase	Annotation â€“ CGAP	Annotation â€“ GNF	Annotation â€“ eGenetics	Blast	Precalculated â€“ Ouzounis	Precalculated â€“ Prospectr	Precalculated â€“ HaploPred	Annotation â€“ Aura	Annotation â€“ mirZ	id
APOA2	Training gene	0.0058	0.0062	0.0174	0.0078	0.0377	0.0247	0.2326	0	0.0111	0.006	0.0139	0.0588	0.0169	0.0185	0.0297	0.0141	0.0403	0.1538	0.0247	0.0204	0.0174	0.0349	0.0291	0.0291	0.0349	0.0233	0.0291	0.5349	0.0349	0	0.0252	0.0168	0.0252	0.006	0.0118	0.0333	0	0.064	0.0338	0.0184	0.1258	0	0.5029	0
APOE	Training gene	0.0116	0.0124	0.0058	0.0155	0.0063	0.0062	0.4961	0.2273	0.0333	0.0179	0.0556	0.0196	0.0508	0.0556	0.0099	0.0563	0.0242	0.0256	0.037	0.0612	0.0174	0.0349	0.0291	0.0291	0.0349	0.0233	0.0291	0.0116	0.0349	0.0108	0.0168	0.0672	0.0168	0.0238	0.0412	0.0267	0.5035	0.0291	0.1351	0.8282	0.3907	0.5166	0.5029	1
INSR	Training gene	0.0174	0.0373	0.0407	0.0465	0.0566	0.037	0.2326	0.0455	0.1	0.1369	0.2222	0.0784	0.9661	0.0741	0.1188	0.0986	0.0323	0.0769	0.1111	0.1633	0.0814	0.0349	0.0291	0.0291	0.0349	0.0233	0.0291	0.0116	0.0349	0.0753	0.2605	0.2941	0.042	0.1726	0.0824	0.2867	0.5035	0.0291	0.0068	0.0736	0.0066	0.0066	0.5029	2
PPARA	Training gene	0.0233	0.0248	0.4012	0.0388	0.044	0.0617	0	0.0909	0.0444	0.0536	0.0694	0.1373	0.5763	0.0926	0.099	0.0423	0.0161	0.2564	0.0123	0.0408	0.0058	0.0349	0.0291	0.0291	0.0349	0.0233	0.0291	0.5349	0.0349	0.043	0.0924	0.1681	0.0672	0.5893	0.1471	0.22	0.0071	0.0291	0	0.0307	0.3245	0.0132	0.5029	3
APOA5	Training gene	0.0291	0.0186	0.0116	0	0.0063	0.0062	0.4961	0	0.0222	0.1726	0.0278	0.0392	0.0169	0.0185	0.0198	0.0282	0.0081	0.1282	0.0494	0.0816	0.0058	0.0349	0.75	0.0291	0.0349	0.5465	0.6047	0.0116	0.0349	0	0	0	0	0.0417	0.0824	0.0133	0.5035	0.0291	0.5541	0.2577	0.4172	0	0.5029	4
TF	Training gene	0.0349	0.2671	0.0581	0.062	0.0314	0.0494	0.2326	0.1364	0.1444	0.0833	0.6389	0.098	0.9153	0.1296	0.1089	0.2254	0.0726	0.2821	0.1975	0.1224	0.0465	0.0349	0.0291	0.0291	0.0349	0.0233	0.0291	0.5349	0.0349	0.0215	0.0084	0.0084	0.0084	0.0119	0.0647	0.02	0.5035	0.0291	0.1554	0.0736	0.1391	0.5166	0.5029	5
BDNF	Training gene	0.0407	0.0435	0.0233	0.031	0.0189	0.0432	0.2326	0	0.0778	0.1131	0	0.1569	0.8305	0.1481	0.2376	0.1127	0.0565	0.0513	0.1235	0.2041	0.093	0.0349	0.0291	0.0291	0.0349	0.0233	0.0291	0.5349	0.0349	0.0645	0.1849	0.1345	0.084	0.1667	0.5824	0.22	0.5035	0.0291	0.0135	0.4601	0.0728	0.5166	0.5029	6
ZFHX3	Training gene	0.0465	0.1925	0.5116	0.0233	0.1509	0.0556	0.7829	0	0.2	0.2202	0	0	0	0.1111	0.2673	0.1268	0.129	0.2308	0.2593	0.7551	0.6453	0.0349	0.0291	0.0291	0.0349	0.0233	0.0291	0.5349	0.0349	0	0	0	0	0.0833	0.1294	0.0467	0.5035	0.0291	0.2568	0.0307	0.0993	0.0199	0.5029	7
NLRP3	Training gene	0.0523	0.0497	0.0349	0	0.0503	0.0309	0.0155	0	0.0889	0.2619	0.2083	0.3137	0.8475	0	0.3069	0.2394	0.0968	0.1026	0.0864	0.4286	0.6453	0.0349	0.0291	0.0291	0.0349	0.5465	0.0291	0.5349	0.0349	0.0968	0.3866	0.042	0.0504	0.1071	0.5824	0.6467	0.5035	0.0291	0.2162	0.4847	0.2914	0.5166	0.5029	8
GHRL	Training gene	0.0581	0.0311	0.0291	0.0698	0.0252	0.0185	0.2326	0	0.1556	0.0298	0.1806	0	0.6102	0	0.2475	0.1549	0.0484	0.2051	0.4444	0.102	0.1047	0.0349	0.0291	0.6047	0.0349	0.5465	0.0291	0.5349	0.0349	0	0	0	0	0.5893	0.5824	0	0.5035	0.0581	0.0676	0.4479	0.9272	0.5166	0.5029	9
PLAGL1	Training gene	0.064	0.236	0.6105	0.0543	0.1384	0.0679	0	0	0	0.0893	0	0	0	0	0	0	0.1613	0.1795	0.3704	0	0.6453	0.0349	0.0291	0.6047	0.0349	0.0233	0.0291	0.5349	0.0349	0.086	0.2269	0.084	0.0588	0.1131	0.5824	0.6467	0.5035	0.0291	0.2027	0.4847	0.6887	0.5166	0.5029	10
CYP11A1	Candidate gene	0.0698	0.2298	0.0872	0.0775	0.5786	0.5494	0.6047	0.6364	0.1333	0.0774	0.1389	0.6667	0.1186	0.6111	0.1584	0.6338	0.121	0.6667	0.2099	0.2245	0.2616	0.186	0.0988	0.6047	0.1512	0.0698	0.0698	0.5349	0.1919	0.4516	0.7983	0.0924	0.8908	0.5893	0.5824	0.26	0.5035	0.6105	0.0473	0.4847	0.4106	0.5166	0.5029	11
HSPD1	Candidate gene	0.0756	0.1988	0.4244	0.2713	0.5786	0.5494	0.4961	0	0.3556	0.0238	0.8194	0.6667	0.5763	0.6111	0.1881	0	0.1694	0.6667	0.284	0.1429	0.0407	0.5581	0.3488	0.1337	0.4535	0.5465	0.1395	0.5349	0.5291	0	0	0	0	0.5893	0.5824	0	0.5035	0.6105	0.1149	0.184	0.0265	0.5166	0.5029	12
CSK	Candidate gene	0.0814	0.1056	0.3081	0.2093	0.1447	0.0988	0	0.6364	0.2444	0.2381	0.4306	0.6667	0.6949	0.2037	0.2772	0.1831	0.1371	0	0.6296	0.8776	0.0581	0.2791	0.1163	0.0756	0.1744	0.5465	0.0756	0.5349	0.2267	0.7527	0.9664	0.3613	0.1513	0.5893	0.5824	0.6467	0.5035	0.0698	0.1486	0.184	0.1126	0.5166	0.5029	13
PCK2	Candidate gene	0.0872	0.8323	0.8198	0.1163	0.5786	0.5494	0.6047	0	0.2222	0.131	0.2917	0.2549	0.7797	0.6111	0.0396	0.0845	0.1855	0.6667	0	0.3673	0.157	0.0698	0.75	0.0872	0.0698	0.5465	0.6047	0.5349	0.0698	0.0323	0.1261	0.7647	0.7395	0.0417	0.5824	0.0933	0.5035	0.6105	0.2635	0.2147	0.5497	0.5166	0.5029	14
PTEN	Candidate gene	0.093	0.0621	0.1047	0.2636	0.5786	0.5494	0	0	0.0556	0.2738	0.1944	0.2353	0.8814	0.6111	0.1287	0.6338	0.1452	0.3077	0.1481	0.1837	0.0698	0.4593	0.2965	0.6047	0.3837	0.5465	0.157	0.5349	0.4244	0	0	0	0	0.5893	0.5824	0	0	0.6105	0.0405	0.7239	0	0.0265	0.5029	15
PRKCA	Candidate gene	0.0988	0.087	0.2151	0.1008	0.1132	0.5494	0	0.6364	0.2667	0.0655	0.5278	0.1961	0.9831	0.6111	0.0792	0.2113	0.1532	0.6667	0.4568	0.4082	0.0523	0.6628	0.3256	0.6047	0.4942	0.5465	0.1744	0.5349	0.5407	0.8172	0.7059	0.7311	0.4958	0.5893	0.0176	0.6467	0.5035	0.6105	0.1216	0.0061	0.0795	0.5166	0.5029	16
CASP8	Candidate gene	0.1047	0.0683	0.0872	0.124	0.0755	0.5494	0.9225	0	0.2667	0.0357	0.5417	0.1765	1	0.6111	0.6634	0.2676	0.2016	0.6667	0.1852	0.3061	0.1395	0.4651	0.3779	0.1919	0.3895	0.5465	0.1919	0.0581	0.4593	0.4946	0.6303	0.3782	0.1008	0.5893	0.5824	0.6467	0.5035	0.2209	0.1757	0.4847	0.4437	0.5166	0.5029	17
PAPSS2	Candidate gene	0.1105	0.3913	0.1047	0.186	0.5786	0.5494	0	0	0.3556	0.244	0.2917	0.6667	0.3051	0	0.6634	0.6338	0.4274	0.6667	0.4198	0.7755	0.6453	0.5058	0.75	0.6047	0.2791	0.5465	0.6047	0.5349	0.3314	0.2258	0.6387	0.4538	0.5462	0.1369	0.5824	0.12	0.5035	0.6105	0	0.4172	0.5298	0.5166	0.5029	18
TIAL1	Candidate gene	0.1163	0.3106	0.3081	0.5581	0.5786	0.5494	0	0	0.7111	0.4405	0	0	0	0.6111	0	0.6338	0	0	0.3827	0	0.6453	0.5988	0.4477	0.0698	0.407	0.5465	0.6047	0.5349	0.5116	0.2151	0.6891	0.6218	0.0756	0.5893	0.5824	0.6467	0	0.6105	0.3108	0.6442	0.351	0.5166	0.5029	19
BAG3	Candidate gene	0.1221	0.4845	0.4535	0.4109	0.5786	0.5494	0.4496	0	0.7111	0.1548	0	0.6667	0	0	0.6634	0	0.5081	0.6667	0.0741	0.4898	0.2384	0.657	0.3023	0.6047	0.4767	0.5465	0.157	0.0523	0.6512	0	0.4706	0.5546	0.4538	0.5893	0.0412	0.22	0	0.6105	0.5068	0.7914	0.1457	0.5166	0.5029	20
CSPG4	Candidate gene	0.1279	0.2609	0.5233	0.4496	0.5786	0.5494	0.2326	0	0	0.5417	0.2917	0	0	0.6111	0.6634	0	0.7742	0	0.2222	0.3878	0.6453	0.3256	0.2267	0.6047	0.2616	0.5465	0.1279	0.5349	0.3663	0.5699	0.3782	0.1429	0.6807	0.5893	0.5824	0.6467	0.5035	0.1395	0.2905	0.0429	0.7748	0.5166	0.5029	21
SIN3A	Candidate gene	0.1337	0.0932	0.3081	0.2016	0.5786	0.5494	0.7829	0	0.3	0.1905	0.0833	0.6667	0.9492	0.6111	0.297	0.0704	0.5726	0	0.6543	0	0.0349	0.5116	0.4419	0.6047	0.5116	0.5465	0.2035	0.0465	0.5465	0	0	0	0	0.5893	0.5824	0.6467	0.5035	0.6105	0.2432	0.5276	0.053	0.5166	0.5029	22
PRKG1	Candidate gene	0.1395	0.2422	0.3081	0.1318	0.1132	0.5494	0.7829	0	0.1667	0.3333	0.8194	0.6667	0.4915	0	0.2871	0.6338	0.1129	0	0.5062	0	0.1686	0.6105	0.2093	0.6047	0.4186	0.5465	0.157	0.5349	0.564	0.6774	0.395	0.0504	0.7227	0.5893	0.5824	0.6467	0	0.6105	0.2838	0.3252	0.0199	0.5166	0.5029	23
IREB2	Candidate gene	0.1453	0.1801	0.8198	0.2481	0.5786	0.5494	0	0	0.2889	0.1667	0	0.098	0	0.6111	0.2277	0	0.5323	0	0.642	0.7347	0.1221	0.3081	0.1279	0.6047	0.2151	0.5465	0.6047	0.5349	0.2558	0.6667	0.4958	0.5378	0.3445	0.0714	0.5824	0.6467	0.5035	0.157	0.5405	0.7239	0.5828	0.5166	0.5029	24
PDHX	Candidate gene	0.1512	0.472	0.3081	0.6512	0.5786	0.5494	0.6047	0	0.3556	0.5119	0.2917	0.6667	0.6441	0.6111	0.6634	0.6338	0.1048	0.6667	0	0	0.1337	0.5698	0.2791	0.6047	0.3081	0.5465	0.1105	0.5349	0.4477	0.3118	0.4034	0.2017	0.8067	0.5893	0.5824	0.6467	0.5035	0.6105	0.0541	0.3865	0.9934	0.5166	0.5029	25
INVS	Candidate gene	0.157	0.5155	0.4535	0.876	0.5786	0.5494	0.4961	0	0	0.6905	0	0	0	0	0	0	0.5242	0.6667	0.2469	0.6735	0.6453	0.4826	0.1395	0.6047	0.1395	0.5465	0.6047	0.5349	0.1628	0.4839	0.2437	0.521	0.6639	0.5893	0.5824	0.6467	0.5035	0.6105	0.027	0.1411	0.2318	0.5166	0.5029	26
NEO1	Candidate gene	0.1628	0.1366	0.1221	0.6279	0.0818	0.0864	0.2326	0	0	0.2083	0.8194	0	0	0.6111	0.6634	0	0.6613	0	0.6914	0	0.186	0.1337	0.2558	0.6047	0.2791	0.5465	0.093	0.5349	0.1744	0.914	0.1345	0.9328	0.4622	0.1369	0.5824	0.6467	0.5035	0.0814	0.1689	0.2822	0.4172	0.5166	0.5029	27
CYP1A2	Candidate gene	0.1686	0.205	0.2151	0.0853	0.5786	0.5494	0.2326	0.1818	0.7111	0.0595	0.1389	0.2157	0.4237	0.6111	0.6634	0.6338	0.0887	0.6667	0.4691	0.449	0.2384	0.8488	0.75	0.6047	0.814	0.5465	0.6047	0.5349	0.843	0.129	0.0336	0.5126	0.1597	0.0417	0.5824	0.0933	0.5035	0.6105	0.6757	0.0736	0.894	0.5166	0.5029	28
RDX	Candidate gene	0.1744	0.4969	0.4535	0.7597	0.5786	0.5494	0.7829	0.6364	0.7111	0.3155	0.8194	0.6667	0	0	0.6634	0.6338	0.4113	0.6667	0.5556	0.7143	0.2267	0.4186	0.25	0.1047	0.407	0.5465	0.6047	0.5349	0.3663	0.5914	0.5126	0.2521	0.5966	0.5893	0.5824	0.6467	0.5035	0.6105	0.3986	0.3497	0.2053	0.5166	0.5029	29
PTGES	Candidate gene	0.1802	0.354	0.3081	0.3178	0.5786	0.5494	0.2326	0	0.1222	0.1012	0.1389	0.6667	0.1186	0.6111	0.6634	0.6338	0.0806	0	0.5679	0.4694	0.1744	0.2209	0.75	0.6047	0.814	0.5465	0.6047	0.5349	0.3023	0	0	0	0	0.5893	0.5824	0.6467	0.5035	0.6105	0.5676	0.4479	0.8278	0.5166	0.5029	30
GOLT1B	Candidate gene	0.186	0.2919	0.6279	0	0.5786	0.5494	0.2326	0	0	0.2262	0	0	0	0	0	0	0	0	0	0	0.6453	0.186	0.0988	0.6047	0.2151	0.5465	0.6047	0.5349	0.1628	0	0.4874	0.3866	0.1849	0.5893	0.5824	0.6467	0.5035	0.1512	0.8986	0.6012	0.5894	0.5166	0.5029	31
CCNB1	Candidate gene	0.1919	0.0994	0.3081	0.4341	0.5786	0.5494	0.2326	0	0.3556	0.0714	0.8194	0.2941	0.7119	0.6111	0.6634	0.1268	0.8952	0	0	0.2857	0.25	0.686	0.4535	0.6047	0.5756	0.5465	0.186	0.5349	0.6279	0.3871	0.8824	0.3193	0.2521	0.5893	0.5824	0.14	0.5035	0.6105	0.4054	0.4847	0.0132	0.5166	0.5029	32
EIF3A	Candidate gene	0.1977	0.528	0.5698	0.5504	0.5786	0.5494	0.7829	0	0.7111	0.3512	0.5833	0.6667	0	0.6111	0.6634	0.6338	0.5968	0	0	0	0.6453	0.6802	0.4593	0.1977	0.6163	0.5465	0.6047	0.5349	0.6802	0.1075	0.8319	0.2773	0.1765	0.5893	0.1059	0.6467	0	0.6105	0.5608	0.6748	0.0464	0.5166	0.5029	33
NPTN	Candidate gene	0.2035	0.1304	0.5	0.5659	0.5786	0.5494	0.2326	0	0	0.8393	0	0	0	0	0	0	0.6613	0	0	0	0.2674	0.4826	0.1628	0.6047	0.2151	0.5465	0.6047	0.5349	0.4942	0.5806	0.8403	0.2101	0.5798	0.5893	0.0412	0.6467	0.5035	0.6105	0.223	0.5706	0.4834	0.5166	0.5029	34
CNTN1	Candidate gene	0.2093	0.1429	0.064	0.3953	0.0818	0.0864	0.2326	0	0.7111	0.75	0.4306	0	0.4915	0.6111	0.6634	0.6338	0.1774	0.6667	0.4321	0.5306	0.2733	0.8488	0.1628	0.6047	0.4244	0.5465	0.157	0.5349	0.5988	0.9462	0.2941	0.8235	0.6555	0.1369	0.5824	0.6467	0.5035	0.093	0.1824	0.0736	0.3974	0.5166	0.5029	35
NEIL1	Candidate gene	0.2151	0.6832	0.3081	0.6744	0.5786	0.5494	0.2326	0.6364	0.1889	0.6667	0	0	0.3051	0	0.6634	0	0.7903	0	0.0617	0	0.1977	0.2209	0.75	0.6047	0.814	0.5465	0.6047	0.5349	0.1919	0	0.3109	0.2857	0.3109	0.5893	0.5824	0.6467	0.5035	0.6105	0.1622	0.3865	0.7483	0.5166	0.5029	36
PACSIN2	Candidate gene	0.2209	0.3789	0.3081	0.4806	0.5786	0.5494	0.7829	0	0.7111	0.119	0	0	0	0	0	0	0.5484	0	0	0	0.2151	0.6221	0.4884	0.6047	0.5523	0.5465	0.6047	0.5349	0.5872	0.2688	0.6975	0.395	0.8319	0.5893	0.5824	0	0.5035	0.6105	0.3446	0.4847	0.4503	0.5166	0.5029	37
POLR2E	Candidate gene	0.2267	0.2733	0.5698	0.4031	0.5786	0.5494	0	0	0.3556	0.869	0.5833	0.6667	0.7288	0.6111	0.1386	0.6338	0.8145	0	0	0	0.6453	0.6221	0.3953	0.6047	0.5407	0.5465	0.6047	0.5349	0.593	0.4086	0.7479	0.3697	0.6303	0.5893	0.5824	0.0933	0.5035	0.1047	0.7095	0.362	0.2185	0.5166	0.5029	38
BBS4	Candidate gene	0.2326	0.0745	0.4535	0.4419	0.5786	0.5494	0.7829	0	0	0.6488	0	0	0	0	0	0	0.4919	0.6667	0.0988	0.3265	0.2558	0.6105	0.75	0.6047	0.5988	0.5465	0.6047	0.5349	0.6163	0.1505	0.7227	0.5042	0.6218	0.5893	0.5824	0.6467	0.5035	0.6105	0.2095	0.7239	0.8212	0.5166	0.5029	39
ETFA	Candidate gene	0.2384	0.7826	0.1337	0.8295	0.5786	0.5494	0.2326	0	0.2333	0.0417	0.2917	0	0.1186	0.6111	0.1584	0.6338	0.5887	0.6667	0	0.551	0.6453	0.3721	0.4012	0.1744	0.5988	0.5465	0.6047	0.5349	0.3198	0.9677	0.9412	0.3109	0.521	0.5893	0.5824	0.28	0.5035	0.1337	0.0608	0.5276	0.649	0.5166	0.5029	40
PSMA4	Candidate gene	0.2442	0.3292	0.5698	0.4264	0.5786	0.5494	0.7829	0.6364	0.7111	0.2321	0.5139	0.6667	0.3051	0.6111	0.6634	0.6338	0.5806	0	0	0	0.2791	0.5872	0.4767	0.1628	0.6279	0.5465	0.6047	0.5349	0.6453	0.1613	0.9916	0.4622	0.1681	0.5893	0.5824	0.6467	0.5035	0.6105	0.9595	0.3006	0.0331	0.5166	0.5029	41
A1CF	Candidate gene	0.25	0.6398	0.3081	0.8837	0.5786	0.5494	0	0	0	0.256	0.5833	0	0	0	0.6634	0.6338	0.9516	0	0.7654	0.5102	0.6453	0.407	0.1279	0.6047	0.3256	0.5465	0.093	0.5349	0.4128	0	0.1176	0.9412	0.0336	0.0179	0.5824	0.0067	0.5035	0.6105	0.9392	0.1411	0.596	0.5166	0.5029	42
SEC23IP	Candidate gene	0.2558	0.5031	0.5698	0.6124	0.5786	0.5494	0.4961	0	0.7111	0.625	0	0	0	0	0	0	0.2903	0	0.8025	0	0.6453	0.4826	0.75	0.6047	0.3256	0.5465	0.6047	0.5349	0.5233	0.2903	0.2101	0.1933	0.2605	0.0714	0.5824	0.6467	0	0.6105	0.6284	0.8405	0.1656	0.5166	0.5029	43
DKK1	Candidate gene	0.2616	0.1118	0.0465	0.2558	0.5786	0.5494	0.2326	0	0.7111	0.125	0	0	0.4915	0.6111	0.6634	0.6338	0.3226	0	0.6049	0.2653	0.2209	0.8488	0.75	0.6047	0.814	0.5465	0.6047	0.5349	0.843	0.3763	0.7395	0.6807	0.2437	0.5893	0.5824	0.1467	0	0.6105	0.3851	0.0736	0.5033	0.5166	0.5029	44
STK17A	Candidate gene	0.2674	0.4286	0.8198	0.2868	0.1132	0.5494	0.6047	0	0.7111	0.1607	0	0	0	0	0	0	0.8468	0	0	0	0.6453	0.2791	0.75	0.6047	0.1512	0.5465	0.6047	0.5349	0.2558	0.3333	0.479	0.5462	0.3193	0.5893	0.5824	0.6467	0.5035	0.6105	0.5338	0.6319	0.4834	0.5166	0.5029	45
MAN2C1	Candidate gene	0.2733	0.7826	0.8198	0.6977	0.5786	0.5494	0	0	0.7111	0.2679	0	0	0	0	0.6634	0.6338	0	0	0	0	0.6453	0.4826	0.4128	0.6047	0.593	0.5465	0.6047	0.5349	0.4942	0.6344	0.4202	0.7479	0.5294	0.5893	0.5824	0.0933	0.5035	0.6105	0.5946	0.3865	0.3841	0.5166	0.5029	46
ADPGK	Candidate gene	0.2791	0.8758	0.1686	0.4961	0.5786	0.5494	0.2326	0	0.3556	0.2976	0	0.6667	0.6441	0	0.6634	0	0.6613	0	0	0	0.6453	0.2791	0.75	0.6047	0.814	0.5465	0.6047	0.5349	0.3663	0	0.5042	0.4118	0.0924	0.5893	0.5824	0.6467	0.5035	0.6105	0.3784	0.7239	0.3245	0.5166	0.5029	47
PRLHR	Candidate gene	0.2849	0.5963	0.8198	0.1628	0.5786	0.5494	0.0155	0	0	0.4762	0.4306	0.6667	0.5763	0.6111	0.6634	0.6338	0.2581	0	0.1728	0.3469	0.6453	0.8488	0.75	0.6047	0.814	0.5465	0.6047	0.5349	0.843	0	0	0	0	0.5893	0.5824	0	0.5035	0.6105	0.6554	0.2883	0.6358	0.5166	0.5029	48
PML	Candidate gene	0.2907	0.0559	0.4012	0.1085	0.5786	0.5494	0.9225	0	0.7111	0.1845	0.8194	0.6667	0.9322	0.6111	0.2574	0.6338	0.4677	0.6667	0.7778	0	0.064	0.343	0.186	0.186	0.3023	0.5465	0.1279	0.5349	0.3372	0.172	0.042	0.4706	0.3277	0.5893	0.5824	0.6467	0.5035	0.6105	0.0203	0.7914	0.8013	0.5166	0.5029	49
ISL2	Candidate gene	0.2965	0.3416	0.8198	0.7209	0.1572	0.0802	0	0	0.7111	0.2798	0	0	0	0	0	0	0	0	0.3333	0	0.6453	0.3256	0.75	0.6047	0.3605	0.5465	0.6047	0.5349	0.3663	0	0	0	0	0.5893	0.5824	0.6467	0.5035	0.0756	0.2365	0.1411	0.1921	0.5166	0.5029	50
DCAF11	Candidate gene	0.3023	0.7329	0.8198	0.7674	0.5786	0.5494	0.7829	0	0.7111	0.4226	0	0	0	0	0	0	0	0	0	0	0.6453	0.6337	0.314	0.6047	0.2791	0.5465	0.6047	0.0291	0.6337	0.0538	0.437	0.4874	0.395	0.5893	0.0824	0.0933	0.5035	0.6105	0.777	0.7239	0	0.5166	0.5029	51
SCAMP2	Candidate gene	0.3081	0.4658	0.6279	0.7752	0.5786	0.5494	0.7829	0	0	0.6964	0	0.6667	0	0.6111	0.6634	0.6338	0.6129	0	0	0	0.6453	0.3256	0.75	0.6047	0.3605	0.5465	0.6047	0.5349	0.3663	0	0.1092	0.4958	0.4118	0.5893	0.1176	0.6467	0.5035	0.6105	0.8851	0.1411	0.5166	0.5166	0.5029	52
SPOCK1	Candidate gene	0.314	0.3851	0.1395	0.3256	0.5786	0.5494	0.2326	0	0.7111	0.8155	0	0.2745	0	0	0.6634	0	0.2742	0	0.8519	0	0.6453	0.1337	0.3779	0.6047	0.814	0.5465	0.6047	0.5349	0.3663	0.6559	0.8067	0.563	0.1345	0.5893	0.5824	0.1467	0.5035	0.0988	0.7297	0.2086	0.404	0.5166	0.5029	53
HSPE1	Candidate gene	0.3198	0.5093	0.5698	0.3876	0.5786	0.5494	0.2326	0	0.7111	0.0952	0	0	0	0	0.6634	0	0.8548	0	0	0	0.6453	0.593	0.4709	0.1802	0.6221	0.5465	0.6047	0.5349	0.6047	0	0	0	0	0.0417	0.5824	0.26	0.5035	0.6105	0.8919	0.3006	0.1325	0.5166	0.5029	54
CHRNA3	Candidate gene	0.3256	0.0807	0.5988	0.2403	0.5786	0.5494	0.4961	0.6364	0.7111	0.4702	0.8194	0.6667	0	0	0.6634	0.6338	0.3387	0.6667	0.2716	0.6327	0.2093	0.8488	0.75	0.6047	0.814	0.5465	0.6047	0.0291	0.843	0.4301	0.521	0.1261	0.916	0.5893	0.0824	0.6467	0.5035	0.6105	0.1014	0.0736	0.4636	0.5166	0.5029	55
PKM	Candidate gene	0.3314	0.8634	0.2151	0.3411	0.5786	0.5494	0.6047	0.6364	0.1778	0.1429	0.2917	0.6667	0.8983	0.6111	0.6634	0.1972	0.9516	0	0.716	0	0.1279	0.4244	0.3895	0.1163	0.4477	0.5465	0.1395	0.5349	0.4767	0.2796	0.8487	0.6471	0.5546	0	0.1353	0.22	0.5035	0.1453	0.3514	0.184	0	0	0.5029	56
PEAK1	Candidate gene	0.3372	0.6522	0.8198	0.6202	0.0943	0.5494	0	0	0.3556	0	0	0	0	0	0	0	0	0	0	0	0.6453	0.1337	0.1628	0.0872	0.1279	0.5465	0.6047	0.5349	0.0756	0	0.1597	0.2269	0.7983	0.5893	0.1471	0.6467	0.5035	0.6105	0.9797	0.6564	0	0	0.5029	57
MINPP1	Candidate gene	0.343	0.5342	0.3895	0.2946	0.5786	0.5494	0.2326	0	0.3556	0.6845	0.2917	0	0.3051	0	0.1584	0.6338	0.879	0.6667	0.8519	0.8571	0.6453	0.1337	0.1628	0.6047	0.2151	0.5465	0.6047	0.0291	0.2558	0.7419	1	0.1849	0.5714	0.5893	0.0824	0.1667	0	0.6105	0.6014	0.2577	0.0596	0.5166	0.5029	58
POU2AF1	Candidate gene	0.3488	0.5652	0.2151	0.1705	0.5786	0.5494	0.6047	0	0	0.5536	0	0	0	0	0	0	0.2661	0	0.6173	0	0.6453	0.5465	0.4128	0.6047	0.564	0.5465	0.6047	0.5349	0.6105	0.5376	0.8908	0.0756	0.7731	0.5893	0.5824	0.6467	0	0.6105	0.25	0.9264	0.6689	0.5166	0.5029	59
WDR61	Candidate gene	0.3547	0.1739	0.3081	0	0.5786	0.5494	0	0	0	0.5714	0	0	0	0	0.6634	0	0.9516	0	0	0	0.6453	0.564	0.4651	0.6047	0.5233	0.5465	0.6047	0.5349	0.5814	0.7097	0.958	0.1765	0.3613	0.5893	0.5824	0.6467	0.5035	0.6105	0.4459	0.5276	0.2848	0.5166	0.5029	60
PRPSAP1	Candidate gene	0.3605	0.6708	0.3081	0	0.5786	0.5494	0.2326	0	0.7111	0.5774	0	0	0	0	0	0	0	0	0	0	0.6453	0.5233	0.4012	0.6047	0.4244	0.5465	0.6047	0.5349	0.5523	0.8925	0.1933	0.3025	0.6471	0.5893	0.0412	0.6467	0.5035	0.6105	0.5	0.1411	0.9735	0.5166	0.5029	61
CYP1A1	Candidate gene	0.3663	0.2795	0.3081	0.093	0.5786	0.5494	0.2326	0.2727	0.1111	0.0119	0.0417	0.6667	0.4237	0.6111	0.6634	0.6338	0.0645	0	0.1605	0.2449	0.0291	0.8488	0.1628	0.6047	0.814	0.5465	0.6047	0.5349	0.843	0.8495	0.9496	0.9664	0.6891	0.5893	0.5824	0	0	0.6105	0.4662	0.0736	0.9205	0.5166	0.5029	62
SCAPER	Candidate gene	0.3721	0.7826	0.8198	0.8992	0.0692	0.0741	0.9225	0	0	0.7262	0	0	0	0	0	0	0.4032	0	0	0	0.6453	0.1744	0.0698	0.6047	0.0814	0.5465	0.6047	0.5349	0.093	0.2043	0.0504	0.7227	0.563	0.5893	0.1176	0.6467	0.5035	0.6105	0.7635	0.7239	0.7285	0.5166	0.5029	63
CHRNB4	Candidate gene	0.3779	0.1242	0.3953	0.3566	0.5786	0.5494	0.2326	0.6364	0.7111	0.7738	0.8194	0.6667	0	0	0.1881	0.6338	0.3468	0	0.5432	0	0.1628	0.8488	0.75	0.6047	0.814	0.5465	0.6047	0.5349	0.843	0.7742	0.1681	0.0588	0.8235	0.5893	0.5824	0.6467	0.5035	0.6105	0.2703	0.0736	0.755	0.5166	0.5029	64
EDC3	Candidate gene	0.3837	0.7329	0.3081	0.9225	0.5786	0.5494	0	0	0.7111	0.7857	0.5833	0	0	0.6111	0.6634	0.6338	0	0	0	0	0.1105	0.5465	0.2209	0.1395	0.3605	0.5465	0.093	0.5349	0.4128	0	0.8571	0.5714	0.4034	0.5893	0.5824	0.6467	0.5035	0.6105	0.4527	0.6748	0.1589	0.0265	0.5029	65
CACUL1	Candidate gene	0.3895	0.3602	0.8198	0	0.5786	0.5494	0	0	0	0	0	0	0	0	0	0	0.6048	0	0	0	0.6453	0.0756	0.75	0.6047	0.0756	0.5465	0.6047	0.5349	0.0814	0	0	0	0	0	0.5824	0.6467	0.5035	0.6105	0.277	0.6748	0	0	0.5029	66
PKP4	Candidate gene	0.3953	0.3478	0.8198	0.7519	0.5786	0.5494	0.7829	0	0	0.4583	0	0	0	0	0.6634	0	0.8145	0	0.8519	0	0.6453	0.4477	0.1919	0.0814	0.1686	0.5465	0.6047	0.5349	0.4651	0.7312	0.5798	0.2353	0.1429	0.0893	0.5824	0.6467	0	0.6105	0.3176	0.546	0.1192	0.5166	0.5029	67
COMMD4	Candidate gene	0.4012	0.7329	0.8198	0	0.5786	0.5494	0	0	0	0.7381	0	0	0	0	0	0	0	0	0	0	0.6453	0.3023	0.2093	0.6047	0.2151	0.5465	0.6047	0.5349	0.2849	0.5269	0.5546	0.479	0.4286	0.5893	0.5824	0.6467	0.5035	0.1977	0.4595	0.2945	0.8675	0.5166	0.5029	68
CHRNA5	Candidate gene	0.407	0.3665	0.5988	0.1938	0.5786	0.5494	0.2326	0.6364	0.7111	0.369	0.8194	0.6667	0	0	0.6634	0.6338	0.3145	0.6667	0.963	0.9184	0.2035	0.0872	0.75	0.6047	0.1512	0.5465	0.6047	0.5349	0.1221	0.3548	0.0672	0.5294	0.479	0.0714	0.5824	0.6467	0.5035	0.6105	0.0878	0.2331	0.947	0.5166	0.5029	69
LRRC32	Candidate gene	0.4128	0.3043	0.5233	0.5349	0.5786	0.5494	0.2326	0	0	0.3988	0	0	0	0	0	0	0.7581	0	0	0	0.6453	0.8488	0.75	0.6047	0.814	0.5465	0.6047	0.5349	0.843	0.5484	0.7899	0.0252	0.3025	0.1369	0.5824	0.12	0.5035	0.6105	0.4797	0.2577	0.5563	0	0.5029	70
PRDX3	Candidate gene	0.4186	0.118	0.5698	0.3488	0.5786	0.5494	0.2326	0	0.7111	0.0476	0	0.3333	0	0.6111	0.6634	0	0	0	0.5926	0	0.6453	0.5291	0.4302	0.1221	0.314	0.5465	0.6047	0.5349	0.5698	0.9892	0.6471	0.6891	0.9244	0.5893	0.5824	0.1667	0.5035	0.6105	0.9865	0.1104	0.2649	0.5166	0.5029	71
ARIH1	Candidate gene	0.4244	0.646	0.3081	0.907	0.5786	0.5494	0	0	0.7111	0.6012	0.8194	0	0	0	0.6634	0	0.371	0	0	0	0.6453	0.6686	0.75	0.6047	0.5349	0.5465	0.6047	0.5349	0.6628	0.1183	0.4118	0.1176	0.4874	0.5893	0.5824	0.6467	0	0.1802	0.75	0.5276	0.2781	0.5166	0.5029	72
CLIP1	Candidate gene	0.4302	0.3727	0.4884	0.5194	0.5786	0.5494	0.4961	0	0.7111	0.3929	0.8194	0	0.7797	0.6111	0.6634	0.6338	0.7177	0	0.8025	0	0.6453	0.6453	0.2442	0.6047	0.343	0.5465	0.6047	0.5349	0.4012	0.4409	0.2185	0.4034	0.9916	0.5893	0.5824	0.6467	0.5035	0.1105	0.1959	0.7914	0.2252	0.5166	0.5029	73
ACER3	Candidate gene	0.436	0.4534	0.8198	0.2171	0.5786	0.5494	0	0	0	0.2857	0	0	0.1186	0.6111	0.0594	0.6338	0.879	0	0	0	0.6453	0.2209	0.75	0.6047	0.2151	0.5465	0.6047	0.5349	0.1919	0	0	0	0	0.5893	0.5824	0	0	0.6105	0	0	0	0.5166	0.5029	74
TSPAN3	Candidate gene	0.4419	0.9441	0.8198	0	0.5786	0.5494	0.2326	0	0	0.5595	0	0	0	0	0	0	0	0	0	0	0.6453	0.2209	0.1628	0.6047	0.2151	0.5465	0.6047	0.5349	0.2558	0.5591	0.8151	0.2605	0.4706	0.5893	0.5824	0.1867	0.5035	0.6105	0.4932	0.7607	0.3113	0.5166	0.5029	75
SNUPN	Candidate gene	0.4477	0.3975	0.436	0.938	0.5786	0.5494	0.6047	0	0.7111	0.7381	0.5833	0	0	0.6111	0.6634	0.6338	0	0	0	0	0.6453	0.5756	0.3372	0.6047	0.5814	0.5465	0.6047	0.5349	0.6337	0.1935	0	0	0	0.5893	0.5824	0.6467	0.5035	0.6105	0.473	0.7239	0.9139	0.5166	0.5029	76
YTHDC2	Candidate gene	0.4535	0.8323	0.3081	0.9922	0.5786	0.5494	0	0	0	0.631	0	0	0	0	0	0	0.3952	0	0	0	0.6453	0.3837	0.314	0.157	0.3605	0.5465	0.6047	0.5349	0.3663	0.2366	0.3529	0.2437	0.7479	0.5893	0.5824	0.6467	0.5035	0.6105	0.7162	0.4294	0.298	0.5166	0.5029	77
NTN1	Candidate gene	0.4593	0.1677	0.1686	0.7287	0.5786	0.5494	0.2326	0	0.3556	0.6786	0.8194	0	0	0.6111	0.6634	0.6338	0.6452	0	0.7531	0	0.0756	0.8488	0.2791	0.6047	0.814	0.5465	0.6047	0.5349	0.843	0	0.1765	0.3277	0.8151	0.5893	0.5824	0.22	0	0.1919	0.9257	0.0123	0.0397	0.5166	0.5029	78
LINGO1	Candidate gene	0.4651	0.3354	0.1221	0.3798	0.5786	0.5494	0.2326	0	0.7111	0.3452	0.4306	0	0	0.1667	0.6634	0.169	0.6935	0	0.9136	0	0.1512	0.8488	0.1279	0.6047	0.814	0.5465	0.6047	0.5349	0.843	0	0	0	0	0.5893	0.5824	0.6467	0.5035	0.6105	0.4189	0.2331	0.106	0.5166	0.5029	79
INPP5F	Candidate gene	0.4709	0.4161	0.8198	0.4186	0.5786	0.5494	0.7829	0	0.7111	0.5179	0	0	0	0	0.6634	0	0.5645	0	0.6667	0	0.6453	0.1744	0.75	0.6047	0.814	0.5465	0.6047	0.5349	0.843	0.6989	0.7311	0.3361	0.2269	0.5893	0.5824	0.6467	0.5035	0.6105	0	0.3865	0.7152	0.5166	0.5029	80
ISLR	Candidate gene	0.4767	0.8137	0.1686	0	0.5786	0.5494	0.2326	0	0	0.619	0	0	0	0	0	0	0	0	0	0	0.6453	0.8488	0.75	0.6047	0.814	0.5465	0.6047	0.5349	0.843	0.6129	0.2857	0.1092	0.1933	0.5893	0.5824	0.06	0.5035	0.6105	0.6824	0.2577	0.1523	0.5166	0.5029	81
ACER3	Candidate gene	0.4826	0.4534	0.8198	0.2171	0.5786	0.5494	0.9767	0	0.7111	0.2857	0.1389	0	0.1186	0.6111	0.0594	0.6338	0.879	0	0	0	0.6453	0.2209	0.4826	0.6047	0.2151	0.5465	0.6047	0.5349	0.1919	0	0	0	0	0.5893	0.5824	0.6467	0.5035	0.6105	0.6351	0.7239	0	0.5166	0.5029	82
RPS28	Candidate gene	0.4884	0.3975	0.5698	0	0.5786	0.5494	0.6047	0	0.3556	0.9226	0.5833	0.6667	0	0.6111	0.6634	0.6338	0	0	0	0	0.6453	0.6744	0.2267	0.1047	0.6105	0.5465	0.6047	0.5349	0.6744	0	0.3277	0.916	0.8487	0.5893	0.1176	0	0	0.6105	0	0	0	0.5166	0.5029	83
ZWINT	Candidate gene	0.4942	0.6273	0.8198	0.5814	0	0.5494	0.7829	0	0	0.1071	0.8194	0	0	0.6111	0.6634	0.6338	0.3871	0	0	0	0.2907	0.5407	0.4302	0.2035	0.4651	0.5465	0.6047	0.0407	0.5698	0.3978	0.9076	0.6723	0.3866	0.1607	0.0824	0.6467	0.5035	0.6105	0.6419	0.9387	0.1722	0.5166	0.5029	84
GRK5	Candidate gene	0.5	0.7019	0.8198	0.3333	0.1132	0.5494	0	0	0.7111	0.381	0.4306	0.6667	0.4915	0.6111	0.6634	0.6338	0.5403	0	0.5309	0.5918	0.6453	0.5756	0.2384	0.6047	0.3372	0.5465	0.1279	0.5349	0.5349	0.9247	0.3193	0.8403	0.9832	0.1369	0.5824	0.6467	0	0.6105	0	0.5153	0.3444	0.5166	0.5029	85
ARHGAP20	Candidate gene	0.5058	0.4907	0.3081	0.7364	0.5786	0.5494	0.6047	0	0	0.494	0.4306	0	0	0	0.6634	0.6338	0.2984	0	0	0	0.6453	0.8488	0.75	0.0581	0.814	0.5465	0.6047	0.5349	0.843	0	0	0	0	0.5893	0.5824	0.6467	0.5035	0.6105	0.8041	0.3865	0.4702	0.5166	0.5029	86
MPI	Candidate gene	0.5116	0.7826	0.4244	0.6822	0.5786	0.5494	0.2326	0	0.7111	0.8036	0.8194	0	0.3051	0.6111	0.6634	0.6338	0.8548	0.6667	0.358	0.551	0.1163	0.2209	0.3547	0.6047	0.5465	0.5465	0.6047	0.5349	0.1221	0.8387	0.6218	0.6134	0.9496	0.5893	0.5824	0.0933	0.5035	0.1279	0.1419	0.7239	0.7152	0.5166	0.5029	87
RILPL2	Candidate gene	0.5174	0.7329	0.8198	0	0.5786	0.5494	0.7829	0	0	0.7798	0	0	0	0	0	0	0	0	0	0	0.6453	0.2209	0.0872	0.0988	0.1047	0.0581	0.064	0.5349	0.1919	0	0	0	0	0.5893	0.5824	0.6467	0.5035	0.6105	0.7905	0.589	0.9338	0.5166	0.5029	88
ABCC9	Candidate gene	0.5233	0.6025	0.5349	0.2791	0.5786	0.5494	0.7829	0.6364	0.2111	0.4464	0.8194	0	0	0	0.6634	0	0.2339	0.6667	0.2346	0.6122	0.6453	0.8488	0.75	0.6047	0.814	0.5465	0.6047	0.5349	0.843	0.6882	0.0756	0.0336	0.7143	0.0417	0.5824	0.6467	0.5035	0.186	0.9054	0.6871	0.8742	0.5166	0.5029	89
RGS10	Candidate gene	0.5291	0.4472	0.1163	0.3721	0.5786	0.5494	0.6047	0	0.7111	0.4881	0	0.6667	0	0	0.2079	0	0.8145	0	0.3457	0	0.6453	0.3488	0.2035	0.6047	0.2151	0.5465	0.1105	0.5349	0.2151	0.9355	0.9244	0.8319	0.2185	0.5893	0.5824	0.1667	0	0.6105	0.5135	0.6196	0.7616	0.5166	0.5029	90
TBC1D21	Candidate gene	0.5349	0.4783	0.8198	0	0.5786	0.5494	0	0	0	0.5893	0	0	0	0	0	0	0	0	0	0	0.6453	0.1337	0.75	0.6047	0.814	0.5465	0.6047	0.5349	0.1221	0	0	0	0	0.5893	0.5824	0.6467	0.5035	0.6105	0.6689	0.7914	0.5166	0.5166	0.5029	91
MCMBP	Candidate gene	0.5407	0.9441	0.8198	0.6434	0.5786	0.5494	0	0	0	0.6548	0	0	0	0	0	0	0.7177	0	0	0	0.6453	0.436	0.3605	0.6047	0.2791	0.5465	0.6047	0.5349	0.4651	0	0.5462	0.7143	0.2101	0.5893	0.5824	0.6467	0.5035	0.6105	0	0.3865	0	0	0.5029	92
RCN2	Candidate gene	0.5465	0.7826	0.5	0.9845	0.5786	0.5494	0.2326	0	0.7111	0.3036	0	0.6667	0	0	0.6634	0	0.5161	0	0	0	0.6453	0.5349	0.2674	0.1686	0.5698	0.5465	0.6047	0.5349	0.5523	0.2473	0.916	0.1597	0.3361	0.5893	0.5824	0.6467	0.5035	0.6105	0.8581	0.0736	0.2119	0.5166	0.5029	93
PTPN9	Candidate gene	0.5523	0.7329	0.3081	0.7829	0.5786	0.5494	0	0	0.7111	0.4048	0	0	0	0	0	0	0.9516	0	0.4074	0	0.6453	0.2616	0.1919	0.6047	0.2151	0.0756	0.6047	0.5349	0.2849	0.3226	0.2017	0.6639	1	0.5893	0.5824	0.6467	0.5035	0.6105	0.6081	0.4294	0.3179	0.5166	0.5029	94
CENPH	Candidate gene	0.5581	0.6584	0.8198	0.5116	0.5786	0.5494	0.7829	0	0	0.2024	0.8194	0	0	0.6111	0.6634	0.6338	0	0	0	0	0.2267	0.3721	0.75	0.6047	0.4826	0.5465	0.6047	0.0581	0.3663	0	0	0	0	0.5893	0.5824	0.6467	0.5035	0.6105	0	0.8712	0.702	0.5166	0.5029	95
DDX11	Candidate gene	0.564	0.323	0.4535	0.8527	0.5786	0.5494	0.7829	0	0	0.6429	0.8194	0	0	0	0	0	0	0.6667	0.4815	0.7755	0.6453	0.4826	0.75	0.6047	0.5814	0.5465	0.6047	0.5349	0.4942	0	0.7143	0.6303	0.7899	0.5893	0.5824	0.6467	0.5035	0.1628	0.8716	0.3865	0.6291	0.5166	0.5029	96
ATAD1	Candidate gene	0.5698	0.1553	0.8198	0.155	0.5786	0.5494	0	0	0	0.1488	0	0	0	0	0	0	0.9516	0	0.3951	0	0.6453	0.2209	0.75	0.6047	0.2791	0.5465	0.6047	0.5349	0.1919	0	0	0	0	0.5893	0.5824	0.6467	0	0.6105	0.7973	0.184	0.3046	0.5166	0.5029	97
ST3GAL4	Candidate gene	0.5756	0.8137	0.4128	0.4574	0.5786	0.5494	0.2326	0	0.7111	0.5357	0.375	0	0.1186	0	0.1584	0.6338	0.4839	0	0.679	0	0.6453	0.1337	0.75	0.6047	0.2151	0.5465	0.6047	0.5349	0.2558	0.5054	0.2521	0.958	0.8571	0.1369	0.5824	0.26	0.5035	0.6105	0.723	0.3129	0.9536	0.5166	0.5029	98
FDX1	Candidate gene	0.5814	0.6646	0.4884	0.3643	0.5786	0.5494	0.2326	0.6364	0.0667	0.5	0.2917	0	0.1186	0	0.6634	0	0.2097	0	0	0.9184	0.6453	0.8488	0.75	0.6047	0.814	0.5465	0.6047	0.5349	0.843	0.2581	0.8655	0.2689	0.8992	0.5893	0.5824	0.26	0.5035	0.6105	0.1284	0.6012	0.6093	0.5166	0.5029	99
HECW1	Candidate gene	0.5872	0.9441	0.3081	0.7442	0.5786	0.5494	0.4961	0	0.7111	0.9167	0	0	0	0	0	0	0.5565	0	0	0	0.6453	0.4302	0.3605	0.6047	0.3605	0.5465	0.6047	0.5349	0.4302	0.828	0.0588	0.4454	0.5126	0.5893	0.5824	0.6467	0	0.2093	0.6892	0.1411	0.3576	0.5166	0.5029	100
UBE2Q2	Candidate gene	0.593	0.7826	0.3081	0.8062	0.5786	0.5494	0.7829	0	0.7111	0.4107	0.8194	0	0.3051	0	0.6634	0	0.9032	0	0	0	0.6453	0.3605	0.75	0.6047	0.4593	0.5465	0.6047	0.5349	0.3198	0	0	0	0	0.5893	0.5824	0.6467	0.5035	0.6105	0.3311	0.2209	0.6623	0.5166	0.5029	101
CRABP1	Candidate gene	0.5988	0.6087	0.6279	0.5891	0.5786	0.5494	0	0.6364	0.7111	0.4524	0	0.6667	0.6441	0	0.6634	0	0.5	0	0.7407	0	0.6453	0.8488	0.75	0.6047	0.814	0.5465	0.6047	0.5349	0.843	0.871	0.6723	0.8151	0.8739	0.5893	0.5824	0.6467	0.5035	0.6105	0.8176	0.5767	0.2384	0.5166	0.5029	102
TSPAN9	Candidate gene	0.6047	0.9441	0.8198	0.1473	0.5786	0.5494	0.2326	0	0	0.8988	0	0	0	0	0	0	0.25	0	0	0	0.6453	0.0872	0.75	0.6047	0.1047	0.5465	0.6047	0.5349	0.0814	0.5161	0.5714	0.8067	0.3697	0.5893	0.5824	0.6467	0.5035	0.6105	0.6216	0.2025	0.702	0.5166	0.5029	103
COX5A	Candidate gene	0.6105	0.6211	0.5698	0.8217	0.5786	0.5494	0.2326	0.6364	0.2556	0.1964	0.2917	0.6667	0.7288	0.6111	0.6634	0.6338	0.7581	0	0	0	0.6453	0.3488	0.75	0.6047	0.4826	0.5465	0.6047	0.5349	0.2558	0.8817	0.9328	0.605	0.8824	0.5893	0.0412	0.0933	0.5035	0.6105	0.7703	0.6442	0.8146	0.5166	0.5029	104
TSKU	Candidate gene	0.6163	0.5466	0.1686	0	0.5786	0.5494	0.2326	0	0.7111	0.4286	0	0	0	0	0	0	0	0	0.9136	0	0.1802	0.8488	0.75	0.6047	0.814	0.5465	0.6047	0.5349	0.843	0	0.3361	0.8824	0.6134	0.0595	0.5824	0.04	0.5035	0.6105	0.527	0.2577	0.4967	0.5166	0.5029	105
ZC3H12C	Candidate gene	0.6221	0.7826	0.8198	0.5271	0.5786	0.5494	0	0	0	0.7619	0	0	0	0	0	0	0.4516	0	0	0	0.6453	0.8488	0.75	0.6047	0.814	0.5465	0.6047	0.5349	0.843	0	0	0	0	0.5893	0.5824	0.6467	0.5035	0.6105	0.4257	0.0307	0.6159	0.5166	0.5029	106
ULK3	Candidate gene	0.6279	0.4224	0.8198	0.3101	0.1132	0.5494	0.7829	0	0	0.9762	0	0.6667	0.7797	0	0.6634	0.6338	0.2258	0	0	0	0.6453	0.2791	0.75	0.6047	0.1047	0.5465	0.6047	0.5349	0.2558	0	0	0	0	0.5893	0.5824	0.6467	0	0.6105	0.7027	0.3374	0.5099	0.5166	0.5029	107
UBL7	Candidate gene	0.6337	0	0.3081	0.9535	0.5786	0.5494	0	0	0	0.4762	0	0	0	0	0	0	0	0	0	0	0.6453	0.6453	0.3779	0.6047	0.5174	0.5465	0.6047	0.5349	0.6628	0	0	0	0	0.5893	0.5824	0.6467	0.5035	0.6105	0.3581	0.7239	0.8874	0.5166	0.5029	108
KLHL29	Candidate gene	0.6395	0	0.8198	0	0.5786	0.5494	0.4961	0	0	0.6607	0	0	0	0	0	0	0.1935	0	0	0	0.6453	0.1337	0.75	0.6047	0.814	0.5465	0.6047	0.5349	0.1221	0	0.3697	0.7059	0.9748	0.5893	0.5824	0.18	0.5035	0.6105	0.0946	0.3497	0	0.5166	0.5029	109
CLK3	Candidate gene	0.6453	0.6894	0.3081	0.969	0.1132	0.5494	0.2326	0.6364	0	0.8274	0	0.6667	0	0	0.6634	0	0	0	0	0	0.6453	0.2558	0.75	0.6047	0.4651	0.5465	0.6047	0.5349	0.2209	0.7957	0.7815	0.7983	0.2017	0.5893	0.5824	0.6467	0.5035	0.6105	0.5203	0.8221	0.5629	0.5166	0.5029	110
STRA6	Candidate gene	0.6512	0.1863	0.5349	0.6357	0.5786	0.5494	0.2326	0	0.7111	0.6369	0.0972	0	0.6441	0	0.0891	0	0.2419	0.6667	0.5185	0.6939	0.6453	0.1337	0.75	0.6047	0.814	0.5465	0.6047	0.5349	0.1221	0	0.3025	0.8487	0.9664	0.5893	0.5824	0.6467	0.5035	0.2151	0.9324	0.7914	0.649	0	0.5029	111
KIRREL3	Candidate gene	0.657	0.559	0.0698	0.3023	0.5786	0.5494	0.2326	0	0	0.8095	0.8194	0	0	0	0.6634	0	0.3629	0.6667	0	0.6531	0.6453	0.8488	0.75	0.6047	0.814	0.5465	0.6047	0.5349	0.843	0	0	0	0	0.5893	0.5824	0.6467	0	0.6105	0.4392	0.3497	0.8742	0	0.5029	112
MYO9A	Candidate gene	0.6628	0.4348	0.8198	1	0.5786	0.5494	0.7829	0	0.7111	0.3274	0.4306	0	0	0	0.6634	0.6338	0	0	0	0	0.6453	0.3953	0.2791	0.1279	0.814	0.5465	0.6047	0.5349	0.3023	0	0.6639	0.7395	0.9076	0.5893	0.0412	0.6467	0.5035	0.1163	0.3041	0.6135	0.0927	0.5166	0.5029	113
PCLO	Candidate gene	0.6686	0.2981	0.3081	0.1783	0.5786	0.5494	0.7829	0	0	0.9286	0	0	0	0	0.6634	0	0.2177	0	0.2963	0	0.6453	0.8488	0.3372	0.6047	0.814	0.5465	0.6047	0.5349	0.843	0.8602	0.4286	0.7731	0.2689	0.5893	0.5824	0.6467	0.5035	0.1221	0	0.6564	0.543	0.5166	0.5029	114
DNAJA4	Candidate gene	0.6744	0.8882	0.4767	0	0.5786	0.5494	0	0	0	0.1786	0	0	0	0	0	0	0.9516	0	0	0	0.6453	0.1337	0.0988	0.6047	0.407	0.5465	0.6047	0.5349	0.1628	0	0.2353	1	0.7563	0.5893	0.5824	0.6467	0.5035	0.6105	0.5743	0.1411	0.6821	0.5166	0.5029	115
C15orf39	Candidate gene	0.6802	0	0.8198	0	0	0	0.6047	0	0	0.6726	0	0	0	0	0	0	0	0	0	0	0.6453	0.0872	0.75	0.6047	0.1279	0.5465	0.6047	0.5349	0.1221	0.1828	0.1429	0.9496	0.1092	0.5893	0.5824	0.6467	0.5035	0.6105	0.9189	0.5644	0.7881	0.5166	0.5029	116
ARID3B	Candidate gene	0.686	0.5652	0.8198	0.6899	0.5786	0.5494	0.6047	0	0	0.7143	0	0	0	0	0	0	0.7177	0	0.4938	0	0.6453	0.3256	0.0756	0.6047	0.436	0.5465	0.6047	0.5349	0.3023	0	0.7563	0.9076	0.4202	0.5893	0.5824	0.6467	0.5035	0.6105	0.9122	0.908	0.4305	0.5166	0.5029	117
SLIT1	Candidate gene	0.6919	0.2547	0.1686	0.4884	0.5786	0.5494	0.2326	0	0.7111	0.4345	0.8194	0	0	0.1852	0.6634	0.6338	0.4435	0	0.9506	0.8367	0.6453	0.8488	0.75	0.6047	0.814	0.5465	0.6047	0.5349	0.843	0	0	0	0	0.5893	0.5824	0.6467	0.5035	0.6105	0	0.589	0.1854	0.5166	0.5029	118
SEMA7A	Candidate gene	0.6977	0.1615	0.0756	0.9147	0.5786	0.5494	0.2326	0	0.7111	0.8512	0.8194	0	0	0.6111	0.6634	0.6338	0.379	0.6667	0.9753	0.9592	0.6453	0.8488	0.2558	0.1512	0.3605	0.5465	0.6047	0.5349	0.843	0.7204	0.1008	0.6975	0.7059	0.5893	0.5824	0.06	0.5035	0.6105	0.0743	0.0736	0.3775	0.5166	0.5029	119
SNX33	Candidate gene	0.7035	0.8571	0.3081	0	0.5786	0.5494	0	0	0	0.5952	0	0	0	0	0.6634	0	0	0	0	0	0.6453	0.8488	0.75	0.6047	0.814	0.5465	0.6047	0.5349	0.843	0	0	0	0	0.5893	0.5824	0.6467	0.5035	0.6105	0.6149	0.1411	0.7815	0.5166	0.5029	120
ABLIM3	Candidate gene	0.7093	0.2236	0.3081	0.9457	0.5786	0.5494	0	0	0.7111	0.506	0.8194	0	0	0	0.6634	0.6338	0.4758	0	0	0	0.6453	0.8488	0.0988	0.0581	0.814	0.5465	0.6047	0.5349	0.843	0.1398	0.8235	0.8739	0.5042	0.5893	0.5824	0.1867	0.5035	0.6105	0.7838	0.1411	0.245	0.5166	0.5029	121
SCAMP5	Candidate gene	0.7151	0.1491	0.6279	0	0.5786	0.5494	0.9767	0	0	0.375	0	0	0	0	0	0	0	0	0	0	0.6453	0.8488	0.314	0.6047	0.1512	0.0523	0.6047	0.5349	0.843	0.7849	0.5378	0.9832	0.2353	0.5893	0.5824	0.6467	0.5035	0.6105	0	0.5767	0.2583	0.5166	0.5029	122
SYT3	Candidate gene	0.7209	0.7081	0.8198	0	0.5786	0.5494	0.9767	0	0.7111	0.4167	0	0	0	0	0	0	0	0	0.8519	0	0.6453	0.2791	0.3372	0.6047	0.3256	0.5465	0.093	0.5349	0.3663	0	0	0	0	0.5893	0.5824	0	0.5035	0.6105	0	0	0.6026	0.5166	0.5029	123
PSTPIP1	Candidate gene	0.7267	0.8261	0.1047	0.6589	0.5786	0.5494	0.7829	0	0	0.3869	0.5	0.6667	0.8475	0	0.3069	0.2394	0.2823	0.6667	0.9877	1	0.0872	0.6919	0.4244	0.6047	0.5291	0.0814	0.1802	0.5349	0.657	0.6022	0.8992	0.437	0.1176	0.0952	0.5824	0.6467	0.5035	0.2035	0.2297	0.8896	0.5762	0	0.5029	124
COA1	Candidate gene	0.7326	0.6335	0.8198	0	0.5786	0.5494	0.2326	0	0	0.7024	0	0	0	0	0	0	0	0	0	0	0.6453	0.3721	0.75	0.6047	0.2151	0.5465	0.6047	0.5349	0.3663	0.6452	0.2773	0.5798	0.3782	0	0.0412	0.6467	0.5035	0.6105	1	0.9816	0	0	0.5029	125
B3GNT6	Candidate gene	0.7384	0.9441	0.8198	0	0.5786	0.5494	0.2326	0	0	0.6071	0.8194	0	0.3051	0	0.6634	0.6338	0	0	0.3086	0	0.6453	0.2209	0.75	0.6047	0.814	0.5465	0.6047	0.5349	0.843	0	0	0	0	0.5893	0.5824	0.6467	0.5035	0.6105	0	0.4847	0	0	0.5029	126
CCDC33	Candidate gene	0.7442	0.7329	0.8198	0.7054	0.5786	0.5494	0.9225	0	0	0.8452	0	0	0	0	0	0	0.6613	0	0	0	0.6453	0.5116	0.4942	0.6047	0.5581	0.0872	0.1977	0.5349	0.5174	0	0.2689	0.3445	0.5882	0.5893	0.5824	0.6467	0.5035	0.6105	0.3649	0.8834	0.9073	0.5166	0.5029	127
FAM204A	Candidate gene	0.75	0	0.8198	0.2326	0	0	0.7829	0	0	0.7024	0	0	0	0	0	0	0.8145	0	0	0	0.6453	0.8488	0.75	0.6047	0.814	0.5465	0.6047	0.5349	0.843	0	0.4622	0.8992	0.7815	0.5893	0.0059	0	0	0.6105	0	0.9632	0	0	0.5029	128
PPCDC	Candidate gene	0.7558	0.9441	0.3081	0	0.5786	0.5494	0	0.6364	0.7111	0.881	0.2917	0	0.3051	0.6111	0.6634	0.6338	0.9516	0	0	0	0.6453	0.8488	0.75	0.6047	0.5	0.5465	0.6047	0.5349	0.843	0	0.8739	0.6555	0.437	0.5893	0.1471	0.6467	0.5035	0.6105	0.3378	0.319	0.457	0.5166	0.5029	129
MLXIP	Candidate gene	0.7616	0.5776	0.6105	0.6667	0.5786	0.5494	0.4961	0	0	0.9345	0	0	0	0	0	0	0	0	0	0	0.6453	0.8488	0.064	0.6047	0.2151	0.5465	0.0814	0.5349	0.2558	0.7634	0.5966	0.8571	0.4454	0.1131	0.5824	0.6467	0.5035	0.6105	0.8108	0.9693	0.6755	0.5166	0.5029	130
SGMS1	Candidate gene	0.7674	0.3168	0.8198	0.5736	0.5786	0.5494	0.9767	0	0.7111	0.4643	0.1389	0	0.1186	0.6111	0.0594	0.6338	0.7016	0	0.1358	0.9184	0.6453	0.8488	0.75	0.6047	0.814	0.5465	0.6047	0.5349	0.843	0.9032	0.3445	0.2185	0.6975	0.5893	0.5824	0.6467	0.5035	0.6105	0	0.4294	0.4371	0.5166	0.5029	131
RAB11FIP2	Candidate gene	0.7733	0.441	0.4884	0.845	0.5786	0.5494	0.7829	0	0.7111	0.9405	0.8194	0	0.4915	0	0.6634	0.6338	0.9516	0	0	0	0.1919	0.8488	0.75	0.6047	0.814	0.5465	0.6047	0.5349	0.843	0.3656	0.4538	0.4286	0.605	0.5893	0.5824	0.6467	0.5035	0.6105	0.6959	0.1411	0.3642	0.5166	0.5029	132
HMCN2	Candidate gene	0.7791	0.8758	0.1686	0	0.0629	0.5494	0.2326	0	0	0.8333	0	0	0	0	0	0	0.4113	0	0	0	0.6453	0.8488	0.75	0.6047	0.814	0.5465	0.6047	0.5349	0.843	0	0	0	0	0.5893	0.5824	0.6467	0.5035	0.6105	0.4324	0.8957	0.8079	0.5166	0.5029	133
RPP25	Candidate gene	0.7849	0.7329	0.8198	0.8682	0.5786	0.5494	0	0	0	0.2143	0	0	0.3051	0	0.6634	0	0	0	0	0	0.6453	0.8488	0.75	0.6047	0.814	0.5465	0.6047	0.5349	0.843	0	0.7731	0.5966	0.7647	0.5893	0.5824	0.06	0.5035	0.6105	0.5878	0.9202	0.8411	0.5166	0.5029	134
RRAGD	Candidate gene	0.7907	0.2857	0.3081	0.5969	0.5786	0.5494	0	0	0.7111	0.8214	0	0.6667	0.7797	0	0.6634	0.6338	0.9516	0	0	0	0.6453	0.4477	0.75	0.6047	0.436	0.5465	0.6047	0.5349	0.4942	0.957	0.7647	0.7815	0.5378	0.5893	0.5824	0.6467	0.5035	0.1744	0.7365	0.9571	0.5629	0.5166	0.5029	135
ST7L	Candidate gene	0.7965	0.6149	0.8198	0	0.5786	0.5494	0.9767	0	0	0.25	0	0	0	0	0	0	0	0	0	0	0.6453	0.1337	0.75	0.6047	0.814	0.5465	0.6047	0.5349	0.1221	0	0.6134	0.4202	0.9328	0.5893	0.5824	0.22	0.5035	0.6105	0.5811	0.908	0.3709	0.5166	0.5029	136
C15orf59	Candidate gene	0.8023	0	0.8198	0	0	0.5494	0.7829	0	0	0.7917	0	0	0	0	0	0	0.4597	0	0	0	0.6453	0.8488	0.75	0.6047	0.814	0.5465	0.6047	0.5349	0.843	0	0	0	0	0.5893	0.5824	0.6467	0	0.6105	0	0	0	0.5166	0.5029	137
TANC2	Candidate gene	0.8081	0.5528	0.8198	0.9302	0.5786	0.5494	0.6047	0	0	0.8988	0	0	0	0	0	0	0.629	0	0.716	0	0.6453	0.8488	0.75	0.6047	0.814	0.5465	0.6047	0.5349	0.843	0.3011	0.084	0.7563	0.8403	0.5893	0.1471	0.6467	0	0.6105	0.4865	0.3313	0.1788	0.5166	0.5029	138
ANKRD6	Candidate gene	0.814	0.4099	0.8198	0.9612	0.5786	0.5494	0.7829	0	0	0.3571	0	0	0	0	0	0	0.3306	0	0	0	0.6453	0.3256	0.2791	0.6047	0.814	0.5465	0.6047	0.5349	0.3023	0.9785	0.4454	0.9748	0.2857	0.5893	0.5824	0.6467	0.5035	0.6105	0.1892	0.7914	0.2715	0.5166	0.5029	139
LRRC49	Candidate gene	0.8198	0.9441	0.8198	0.814	0.5786	0.5494	0.9225	0	0	0.756	0	0	0	0	0	0	0.629	0	0	0	0.6453	0.1337	0.75	0.6047	0.1047	0.5465	0.6047	0.5349	0.1221	0	0.6555	0.8908	0.3529	0.5893	0.5824	0.6467	0.5035	0.6105	0.3919	0.7914	0.6424	0.5166	0.5029	140
TMEM98	Candidate gene	0.8256	0.9441	0.8198	0	0	0.5494	0.2326	0	0	0.3631	0	0	0	0	0	0	0.9516	0	0.9383	0	0.6453	0.2791	0.75	0.6047	0.2791	0.5465	0.6047	0.5349	0.2558	0	0	0	0	0.5893	0.5824	0.6467	0.5035	0.6105	0.4122	0.4479	0.702	0.5166	0.5029	141
FAM219B	Candidate gene	0.8314	0	0.8198	0	0	0.5494	0.2326	0	0	0.7321	0	0	0	0	0	0	0	0	0	0	0.6453	0.1337	0.75	0.6047	0.814	0.5465	0.6047	0.5349	0.1221	0	0	0	0	0.5893	0.5824	0	0.5035	0.6105	0.6486	0.9509	0	0	0.5029	142
LOXL1	Candidate gene	0.8372	0.8758	0.0814	0.4651	0.5786	0.5494	0.2326	0	0.7111	0.3393	0.8194	0	0	0	0.6634	0	0.4355	0.6667	0.7037	0.9796	0.2849	0.8488	0.75	0.6047	0.814	0.5465	0.6047	0.5349	0.843	0.4731	0.9748	0.5882	0.2941	0.5893	0.5824	0.1333	0.5035	0.6105	0.7432	0.5521	0.0662	0.5166	0.5029	143
FAM45A	Candidate gene	0.843	0	0.8198	0	0	0.5494	0	0	0	0.8571	0	0	0	0	0	0	0	0	0	0	0.6453	0.8488	0.75	0.6047	0.814	0.5465	0.6047	0.5349	0.843	0	0	0	0	0.5893	0.5824	0	0.5035	0.6105	0.8311	0.7239	0	0.5166	0.5029	144
NRL	Candidate gene	0.8488	0.2174	0.4535	0.5426	0.5786	0.5494	0.7829	0	0	0.9762	0	0	0	0	0.6634	0	0.6855	0.6667	1	0.8163	0.6453	0.8488	0.75	0.6047	0.814	0.5465	0.6047	0.5349	0.843	0.4624	0.1513	0.1513	0.7311	0.5893	0.5824	0.22	0	0.6105	0.0811	0.6196	0.0861	0.5166	0.5029	145
RABL6	Candidate gene	0.8547	0.8509	0.8198	0.8915	0.5786	0.5494	0.7829	0	0	0.3214	0	0	0	0	0	0	0	0	0	0	0.6453	0.5988	0.75	0.6047	0.814	0.5465	0.6047	0.5349	0.6163	0	0.5882	0.9244	0.6387	0	0.5824	0.6467	0.5035	0.6105	0	0.3865	0	0	0.5029	146
LCN15	Candidate gene	0.8605	0.677	0.0523	0	0.5786	0.5494	0.2326	0	0.7111	0.5476	0	0	0	0	0	0	0	0	0	0	0.6453	0.8488	0.75	0.6047	0.814	0.5465	0.6047	0.5349	0.843	0	0	0	0	0.5893	0.5824	0	0.5035	0.6105	0.3243	0.9939	0	0	0.5029	147
B3GNT6	Candidate gene	0.8663	0.9441	0.8198	0	0.5786	0	0	0	0	0.6071	0	0	0.3051	0	0.6634	0.6338	0	0	0.3086	0	0.6453	0.2209	0.75	0.6047	0.814	0.5465	0.6047	0.5349	0.843	0	0	0	0	0.5893	0.5824	0	0	0.6105	0	0	0	0	0.5029	148
RAB35	Candidate gene	0.8721	0.5404	0.1977	0.8372	0.5786	0.5494	0.9225	0	0	0.3095	0	0	0	0	0	0	0.9516	0	0	0	0.0988	0.3837	0.75	0.1395	0.5	0.5465	0.6047	0.5349	0.4302	0.4194	0.6807	0.7899	0.2773	0.5893	0.5824	0.6467	0.5035	0.6105	0.8514	0.9877	0.1987	0.5166	0.5029	149
VWC2	Candidate gene	0.8779	0.2484	0.1686	0	0.5786	0.5494	0.2326	0	0	0.9762	0	0	0	0	0	0	0	0	0	0	0.6453	0.8488	0.75	0.6047	0.814	0.5465	0.6047	0.5349	0.843	0	0	0	0	0.5893	0	0.6467	0.5035	0.6105	0	0.5521	0.7616	0.5166	0.5029	150
SENP8	Candidate gene	0.8837	0.9441	0.2151	0	0.5786	0.5494	0	0	0	0.5833	0	0	0	0	0	0	0	0	0	0	0.6453	0.6395	0.75	0.6047	0.814	0.5465	0.6047	0.5349	0.843	0	0	0	0	0.5893	0.5824	0.6467	0.5035	0.6105	0.8649	0.8528	0.7417	0.5166	0.5029	151
C2orf70	Candidate gene	0.8895	0	0.8198	0	0.5786	0.5494	0.0155	0	0	0	0	0	0	0	0	0	0	0	0	0	0.6453	0.8488	0.75	0.6047	0.814	0.5465	0.6047	0.5349	0.843	0	0	0	0	0.5893	0.5824	0.6467	0.5035	0.6105	0.9932	0.9264	0	0.5166	0.5029	152
NRG4	Candidate gene	0.8953	0.5217	0.4128	0	0.5786	0	0.9767	0	0	0.7202	0.4306	0.6667	0.4915	0.6111	0.2178	0.6338	0	0	0.8519	0	0.6453	0.8488	0.1628	0.6047	0.2151	0.064	0.6047	0.5349	0.843	0	0	0	0	0.5893	0.5824	0.6467	0.5035	0.0872	0.3716	1	0.9603	0.5166	0.5029	153
MRPS36	Candidate gene	0.9012	0.9441	0.8198	0.7907	0	0	0	0	0	0.5238	0	0	0	0	0	0	0	0	0	0	0.6453	0.407	0.75	0.6047	0.1047	0.5465	0.6047	0.5349	0.4477	0	0	0	0	0.5893	0.5824	0	0	0.6105	0	0	0.8411	0.5166	0.5029	154
STOML1	Candidate gene	0.907	0.8447	0.8198	0.9767	0.5786	0.5494	0.2326	0	0	0.9762	0	0	0	0	0	0	0	0	0	0	0.6453	0.4477	0.75	0.6047	0.814	0.5465	0.6047	0.5349	0.4128	0.3441	0.563	0.8655	0.1261	0.5893	0.5824	0.6467	0.5035	0.6105	0.2973	0.7914	0.4768	0.5166	0.5029	155
MRPS36	Candidate gene	0.9128	0.9441	0.8198	0.7907	0	0	0.2326	0	0	0.5238	0	0	0	0	0	0	0	0	0	0	0.6453	0.407	0.75	0.6047	0.1047	0.5465	0.6047	0.5349	0.4477	0	0	0	0	0.5893	0.5824	0.6467	0.5035	0.6105	0.8784	0.8712	0.8411	0.5166	0.5029	156
C11orf53	Candidate gene	0.9186	0	0.8198	0	0	0	0.6047	0	0	0	0	0	0	0	0	0	0.8145	0	0	0	0.6453	0.1337	0.75	0.6047	0.814	0.5465	0.6047	0.5349	0.1221	0	0	0	0	0.5893	0.5824	0	0.5035	0.6105	0.9662	0.8712	0.3377	0.5166	0.5029	157
CSTF2T	Candidate gene	0.9244	0.9441	0.8198	0.4729	0.5786	0.5494	0	0	0	0.7976	0	0.6667	0.3051	0	0.6634	0	0.75	0	0.8025	0	0.6453	0.4826	0.75	0.6047	0.3895	0.5465	0.6047	0.5349	0.4942	0.8065	0.605	0.3529	0.9412	0.5893	0.5824	0.6467	0.5035	0.6105	0.6622	0.9755	0.8609	0.5166	0.5029	158
IL31	Candidate gene	0.9302	0.6957	0.1686	0	0	0.5494	0.2326	0	0	0.9524	0	0	0	0	0.6634	0	0.7419	0	0	0	0.6453	0.8488	0.75	0.6047	0.814	0.5465	0.6047	0.5349	0.843	0	0	0	0	0.5893	0	0	0	0.6105	0	0	0.7947	0.5166	0.5029	159
CPLX3	Candidate gene	0.936	0.2112	0.5465	0	0.5786	0.5494	0.7829	0	0	0.9762	0	0	0	0	0.6634	0	0.3548	0	0.8889	0	0.6453	0.8488	0.75	0.6047	0.814	0.5465	0.6047	0.5349	0.843	0	0	0	0	0.5893	0.5824	0	0	0.6105	0	0	0.5298	0.5166	0.5029	160
ALS2CR12	Candidate gene	0.9419	0.5901	0.8198	0.1395	0.5786	0	0.7829	0	0	0.8988	0	0	0	0	0	0	0.8145	0	0	0	0.6453	0.8488	0.0756	0.6047	0.1047	0.5465	0.6047	0.5349	0.843	0	0	0	0	0.5893	0.5824	0	0.5035	0.6105	0.1081	0.9387	1	0.5166	0.5029	161
PARP6	Candidate gene	0.9477	0.9441	0.8198	0.5969	0.5786	0.5494	0	0	0.7111	0.8988	0	0	0	0	0	0	0.7823	0	0	0	0.6453	0.8488	0.75	0.6047	0.814	0.5465	0.6047	0.5349	0.843	0	0.3613	0.6387	0.6723	0.5893	0.5824	0.22	0.5035	0.6105	0.9527	0.8589	0.6159	0.5166	0.5029	162
LMAN1L	Candidate gene	0.9535	0.9441	0.5233	0.5039	0.5786	0.5494	0.4961	0	0	0.8988	0	0	0.3051	0	0	0	0.7177	0	0	0	0.6453	0.8488	0.75	0.6047	0.814	0.5465	0.6047	0.5349	0.843	0	0	0	0	0.5893	0.5824	0.6467	0.5035	0.1686	0.8243	0.638	0.9801	0.5166	0.5029	163
GPR142	Candidate gene	0.9593	0.7578	0.8198	0	0.5786	0.5494	0.6047	0	0	0.9762	0	0	0	0	0	0	0	0	0	0	0.6453	0.8488	0.75	0.6047	0.814	0.5465	0.6047	0.5349	0.843	0	0	0	0	0.5893	0.5824	0	0	0.6105	0	0	0	0	0	164
MGAT5	Candidate gene	0.9651	0.9441	0.8198	0.7132	0.5786	0.5494	0.4961	0	0.7111	0.5655	0.8194	0	0.3051	0	0.6634	0.6338	0.3065	0	0.5802	0	0.1453	0.8488	0.75	0.6047	0.814	0.5465	0.6047	0.5349	0.843	0.6237	0.5294	0.9916	0.958	0.5893	0.5824	0.6467	0.5035	0.6105	0.8446	0.2331	0.9007	0.5166	0.5029	165
TMEM71	Candidate gene	0.9709	0.9441	0.8198	0	0	0.5494	0.6047	0	0	0.869	0	0	0	0	0	0	0.629	0	0	0	0.6453	0.8488	0.75	0.6047	0.814	0.5465	0.6047	0.5349	0.843	0	0	0	0	0.0952	0.5824	0	0.5035	0.6105	0.5473	0.7914	0.9669	0.5166	0.5029	166
ODF3L1	Candidate gene	0.9767	0	0.8198	0	0.5786	0.5494	0	0	0	0.9762	0	0	0	0	0	0	0	0	0	0	0.6453	0.8488	0.75	0.6047	0.814	0.5465	0.6047	0.5349	0.843	0	0	0	0	0.5893	0.5824	0.6467	0.5035	0.6105	0.9459	0.4847	0.8543	0.5166	0.5029	167
LRRC43	Candidate gene	0.9826	0	0.8198	0	0.5786	0	0	0	0	0.9464	0	0	0	0	0	0	0	0	0	0	0.6453	0.8488	0.75	0.6047	0.814	0.5465	0.6047	0.5349	0.843	0	0	0	0	0.5893	0.5824	0.6467	0.5035	0.6105	0.8378	0.8344	0.9801	0.5166	0.5029	168
ZPBP	Candidate gene	0.9884	0.5839	0.1686	0.8605	0.5786	0.5494	0.2326	0	0	0.869	0	0	0	0	0	0	0	0	0.9012	0	0.6453	0.8488	0.75	0.6047	0.814	0.5465	0.6047	0.5349	0.843	1	0.9832	0.1008	0.8655	0.5893	0.5824	0.6467	0.5035	0.6105	0.7568	0.2577	0.2517	0	0.5029	169
TMEM202	Candidate gene	0.9942	0.9441	0.8198	0	0	0	0.9767	0	0	0.7619	0	0	0	0	0	0	0	0	0	0	0.6453	0.8488	0.75	0.6047	0.814	0.5465	0.6047	0.5349	0.843	0	0	0	0	0.5893	0.5824	0	0.5035	0.6105	0	0.908	0.7285	0	0.5029	170
CIB4	Candidate gene	1	0.7826	0.8198	0	0.5786	0.5494	0	0	0	0.9762	0	0	0	0	0	0	0.9516	0	0	0	0.6453	0.8488	0.75	0.6047	0.814	0.5465	0.6047	0.5349	0.843	0	0	0	0	0.5893	0.5824	0.6467	0.5035	0.6105	0.973	0.8466	0.9338	0	0.5029	171

## Sheet: Reining_Metabolism
Gene name	Group	P-value	Annotation â€“ Gene Ontology	Annotation â€“ UniProt	Text-mining	Annotation â€“ InterPro	Annotation â€“ Pfam	Annotation â€“ SIMAP (localization)	Annotation â€“ DrugBank	Annotation â€“ Stitch	Annotation â€“ RGD ChEBI	Annotation â€“ Reactome	Annotation â€“ WikiPathways	Annotation â€“ RGD pathways	Annotation â€“ BioCarta	Annotation â€“ CPDB	Annotation â€“ hiPathDB	Annotation â€“ GAD	Annotation â€“ OMIM	Annotation â€“ RGD MP	Annotation â€“ RGD RDO	Interaction â€“ String	Interaction â€“ BioGrid	Interaction â€“ I2D	Interaction â€“ IntAct	Interaction â€“ iRefIndex	Interaction â€“ Mint	Interaction â€“ HPRD	Interaction â€“ MIPS	Interaction â€“ GeneRIF	Expression â€“ Su et al (2002)	Expression â€“ Su et al (2004)	Expression â€“ CMAP	Expression â€“ Lukk et al	Annotation â€“ PaGenBase	Annotation â€“ CGAP	Annotation â€“ GNF	Annotation â€“ eGenetics	Blast	Precalculated â€“ Ouzounis	Precalculated â€“ Prospectr	Precalculated â€“ HaploPred	Annotation â€“ Aura	Annotation â€“ mirZ	id
APOA2	Training gene	0.0104	0.0109	0.0313	0.0141	0.0638	0.044	0.2162	0	0.0204	0.0105	0.0345	0.1034	0.0385	0.04	0.0492	0.0286	0.0714	0.1667	0.0541	0.0263	0.0313	0.0625	0.0521	0.0521	0.0625	0.0417	0.0521	0.5417	0.0625	0	0.0476	0.0317	0.0476	0.0106	0.0313	0.0843	0	0.1146	0.0488	0.0116	0.1591	0	0.5054	0
APOE	Training gene	0.0208	0.0217	0.0104	0.0282	0.0106	0.011	0.4459	0.2857	0.0612	0.0211	0.1034	0.0345	0.1154	0.12	0.0164	0.1143	0.0429	0.0278	0.0811	0.0789	0.0313	0.0625	0.0521	0.0521	0.0625	0.0417	0.0521	0.0208	0.0625	0.0217	0.0317	0.0952	0.0317	0.0319	0.0417	0.0361	0.5132	0.0521	0.1585	0.7907	0.4432	0.5169	0.5054	1
INSR	Training gene	0.0313	0.0652	0.0938	0.0845	0.0957	0.0659	0.2162	0.0714	0.1837	0.1263	0.2759	0.1379	0.9615	0.16	0.1475	0.1714	0.0571	0.0833	0.1892	0.1842	0.1146	0.0625	0.0521	0.0521	0.0625	0.0417	0.0521	0.0208	0.0625	0.1522	0.2063	0.3651	0.0635	0.2234	0.0938	0.2651	0.5132	0.0521	0.0122	0.1047	0.0114	0.0112	0.5054	2
PPARA	Training gene	0.0417	0.0435	0.3958	0.0704	0.0745	0.1099	0	0.1429	0.0816	0.0421	0.1379	0.2069	0.3462	0.2	0.0984	0.0857	0.0286	0.2778	0.027	0.0526	0.0104	0.0625	0.0521	0.0521	0.0625	0.0417	0.0521	0.5417	0.0625	0.087	0.0794	0.2063	0.1111	0.617	0.1667	0.2169	0.0132	0.0521	0	0.0349	0.3636	0.0225	0.5054	3
APOA5	Training gene	0.0521	0.0326	0.0208	0	0.0106	0.011	0.4459	0	0.0408	0.1474	0.069	0.069	0.0385	0.04	0.0328	0.0571	0.0143	0.1389	0.1081	0.1053	0.0104	0.0625	0.75	0.0521	0.0625	0.5521	0.625	0.0208	0.0625	0	0	0	0	0.0638	0.0938	0.012	0.5132	0.0521	0.5732	0.2791	0.4773	0	0.5054	4
TF	Training gene	0.0625	0.3043	0.1354	0.1127	0.0532	0.0879	0.2162	0.2143	0.2245	0.0632	0.7241	0.1724	0.8846	0.28	0.1311	0.4	0.1143	0.3056	0.2703	0.1579	0.0729	0.0625	0.0521	0.0521	0.0625	0.0417	0.0521	0.5417	0.0625	0.0435	0.0159	0.0159	0.0159	0.0213	0.0625	0.0241	0.5132	0.0521	0.1829	0.1047	0.1818	0.5169	0.5054	5
BDNF	Training gene	0.0729	0.0761	0.0521	0.0563	0.0319	0.0769	0.2162	0	0.1429	0.0842	0	0.2414	0.6154	0.32	0.1803	0.2286	0.1	0.0556	0.2432	0.2105	0.125	0.0625	0.0521	0.0521	0.0625	0.0417	0.0521	0.5417	0.0625	0.1304	0.1429	0.1587	0.1429	0.2128	0.5938	0.2169	0.5132	0.0521	0.0244	0.5	0.0795	0.5169	0.5054	6
ZFHX3	Training gene	0.0833	0.163	0.6146	0.0423	0.2021	0.0989	0.8378	0	0.2653	0.1684	0	0	0	0.24	0.2131	0.2571	0.1857	0.25	0.3784	0.7632	0.6563	0.0625	0.0521	0.0521	0.0625	0.0417	0.0521	0.5417	0.0625	0	0	0	0	0.0851	0.1563	0.0964	0.5132	0.0521	0.2927	0.0349	0.1364	0.0337	0.5054	7
NLRP3	Training gene	0.0938	0.087	0.0729	0	0.0851	0.0549	0.0135	0	0.1633	0.2632	0.2414	0.3793	0.7692	0	0.2459	0.4286	0.1714	0.1111	0.1622	0.3421	0.6563	0.0625	0.0521	0.0521	0.0625	0.5521	0.0521	0.5417	0.0625	0.1957	0.3492	0.0794	0.0794	0.1489	0.5938	0.6386	0.5132	0.0521	0.2439	0.5233	0.3523	0.5169	0.5054	8
GHRL	Training gene	0.1042	0.0543	0.0625	0.1268	0.0426	0.033	0.2162	0	0.2449	0.0316	0.2069	0	0.3846	0	0.1967	0.3143	0.0857	0.2222	0.5135	0.1316	0.1458	0.0625	0.0521	0.6146	0.0625	0.5521	0.0521	0.5417	0.0625	0	0	0	0	0.617	0.5938	0	0.5132	0.1042	0.0854	0.4767	0.9318	0.5169	0.5054	9
PLAGL1	Training gene	0.1146	0.2935	0.6667	0.0986	0.1702	0.1209	0	0	0	0.0737	0	0	0	0	0	0	0.2429	0.1944	0.4595	0	0.6563	0.0625	0.0521	0.6146	0.0625	0.0417	0.0521	0.5417	0.0625	0.1739	0.1746	0.127	0.0952	0.1596	0.5938	0.6386	0.5132	0.0521	0.2195	0.5233	0.6705	0.5169	0.5054	10
IGFBP1	Candidate gene	0.125	0.0978	0.1042	0.169	0.1064	0.5824	0.2162	0	0.3265	0.1368	0.8621	0.7241	0.8846	0.68	0.6393	0.3429	0.1429	0	0.8919	0.2368	0.0625	0.2083	0.1146	0.6146	0.2083	0.5521	0.1146	0.5417	0.1354	0.2609	0.6032	0.4286	0.1587	0.0426	0.5938	0.0602	0.5132	0.2188	0.378	0.2209	0.1932	0.5169	0.5054	11
PCK2	Candidate gene	0.1354	0.8043	0.8542	0.1831	0.6064	0.5824	0.6081	0	0.3061	0.1158	0.3793	0.3103	0.5769	0.68	0.0656	0.1429	0.2714	0.6667	0	0.2632	0.1979	0.125	0.75	0.1146	0.125	0.5521	0.625	0.5417	0.125	0.0652	0.0952	0.8254	0.7778	0.0638	0.5938	0.1325	0.5132	0.6146	0.3049	0.2442	0.5227	0.5169	0.5054	12
KPNB1	Candidate gene	0.1458	0.413	0.4063	0.4648	0.6064	0.5824	0	0	0.7347	0.1789	0.1724	0.7241	0	0.36	0.082	0.7429	0.8143	0	0.7297	0	0.6563	0.6979	0.4167	0.1667	0.7604	0.5521	0.1875	0.5417	0.5833	0.2174	0.7143	0.3968	0.3016	0.617	0.0104	0.6386	0.5132	0.6146	0.8415	0.5581	0.0227	0.5169	0.5054	13
CXCL14	Candidate gene	0.1563	0.5	0.1042	0.2958	0.6064	0.5824	0.2162	0	0	0.1895	0	0.7241	0	0	0.6393	0.7429	0.4714	0	0.1351	0	0.2083	0.2708	0.75	0.6146	0.8854	0.5521	0.625	0.5417	0.25	0	0.7302	0.0635	0.2063	0.617	0.0104	0.6386	0.5132	0.6146	0.6829	0.4767	0.4318	0.5169	0.5054	14
BACE1	Candidate gene	0.1667	0.75	0.2292	0.3944	0.6064	0.5824	0.2162	0.7143	0.7347	0.0947	0	0.2759	0.5	0.68	0.6393	0.7429	0.2286	0	0.3514	0	0.1042	0.4792	0.2813	0.6146	0.4167	0.5521	0.2396	0.5417	0.4479	0	0.5873	0.873	0.1746	0.617	0.5938	0.6386	0.5132	0.6146	0	0.5698	0.3977	0.5169	0.5054	15
SVEP1	Candidate gene	0.1771	0.837	0.2396	0.4789	0.1064	0.5824	0.2162	0	0	0.1053	0	0	0	0	0	0	0.5429	0	0	0	0.6563	0.3646	0.25	0.6146	0.375	0.5521	0.1771	0.5417	0.4271	0.6957	0.8254	0.3175	0.6984	0.0957	0.5938	0.1928	0.5132	0.1563	0.2073	0.5233	0.125	0.5169	0.5054	16
KIF1A	Candidate gene	0.1875	0.6304	0.1771	0.6056	0.6064	0.5824	0.4459	0.3571	0.7347	0.5789	0	0	0	0	0	0	0.6714	0.6667	0.4324	0.4474	0.2396	0.25	0.2083	0.6146	0.1458	0.5521	0.1458	0.5417	0.2292	0	0.7778	0.9524	0.381	0.617	0.5938	0.6386	0.5132	0.2083	0.1707	0.0581	0.2614	0.5169	0.5054	17
ITGB2	Candidate gene	0.1979	0.337	0.1458	0.2817	0.6064	0.5824	0.2162	0.7143	0.7347	0.3895	0.5172	0.7241	1	0.68	0.2295	0.3429	0.1286	0.6667	0.6216	0.2895	0.1875	0.625	0.3854	0.6146	0.4688	0.5521	0.2083	0.0833	0.4792	0.7174	0.9365	0.7302	0.1905	0.117	0.5938	0.6386	0.5132	0.6146	0.0366	0.1047	0.4545	0.5169	0.5054	18
PRMT8	Candidate gene	0.2083	0.7065	0.5625	0.6197	0.6064	0.5824	0.2162	0	0	0.7158	0	0	0	0	0	0	0.3857	0	0.9459	0	0.6563	0.625	0.25	0.6146	0.2604	0.5521	0.625	0.5417	0.6771	0	0.4921	0.4444	0.4603	0.617	0.5938	0.6386	0.5132	0.6146	0.6098	0.4535	0.5	0.5169	0.5054	19
RDX	Candidate gene	0.2188	0.5109	0.4792	0.7887	0.6064	0.5824	0.8378	0.7143	0.7347	0.4	0.8621	0.7241	0	0	0.6393	0.7429	0.4429	0.6667	0.5946	0.4474	0.2396	0.4479	0.2917	0.1354	0.5	0.5521	0.625	0.5417	0.4271	0.6304	0.4127	0.2857	0.5714	0.617	0.5938	0.6386	0.5132	0.6146	0.439	0.3605	0.2273	0.5169	0.5054	20
PITPNC1	Candidate gene	0.2292	0.2717	0.2188	0.6761	0.6064	0.5824	0	0	0	0.4211	0	0	0	0	0	0	0.7857	0	0	0	0.6563	0.2708	0.1458	0.6146	0.2292	0.5521	0.625	0.5417	0.25	0	0.1587	0.8571	0.6032	0.617	0.5938	0.6386	0.5132	0.6146	0.6585	0.3605	0.2159	0.5169	0.5054	21
ABCA13	Candidate gene	0.2396	0.6739	0.6875	0	0.6064	0.5824	0.4459	0	0	0.6316	0	0	0	0	0.6393	0	0.5286	0	0	0	0.0833	0.1354	0.75	0.6146	0.1354	0.5521	0.625	0.5417	0.1458	0	0	0	0	0.617	0.5938	0.0602	0	0.6146	0.6707	0.3372	0.7841	0.5169	0.5054	22
SRPK1	Candidate gene	0.25	0.3696	0.2708	0.6901	0.1596	0.5824	0.8378	0	0.4082	0.4105	0	0.7241	0	0	0.6393	0	0.9857	0	0	0	0.6563	0.4375	0.2708	0.2292	0.6458	0.5521	0.625	0.5417	0.5208	0.3478	0.254	0.3492	0.3175	0.617	0.0417	0.1687	0.5132	0.6146	0.5854	0.1628	0.3295	0.5169	0.5054	23
NRIP1	Candidate gene	0.2604	0.1087	0.3438	0.2254	0.6064	0	0	0.7143	0.2653	0.6947	0	0.3448	0.8846	0.68	0.1148	0.2	0.3571	0	0.5405	0	0.0521	0.4063	0.3333	0.1771	0.375	0.5521	0.2292	0.5417	0.4583	0.3696	0.3016	0.1905	0.9365	0.617	0.5938	0.6386	0.5132	0.6146	0	0.8837	0.1023	0.5169	0.5054	24
PCSK7	Candidate gene	0.2708	0.5761	0.2083	0.7324	0.6064	0.5824	0.2162	0	0.102	0.7789	0	0	0	0	0	0	0.6571	0	0	0	0.1667	0.2083	0.3438	0.6146	0.5	0.5521	0.2083	0.5417	0.3438	0.2391	0.9048	0.9048	0.5079	0.617	0.5938	0.6386	0.5132	0.6146	0.061	0.1047	0.2727	0.5169	0.5054	25
IL10RA	Candidate gene	0.2813	0.587	0.1458	0.1408	0.1489	0.5824	0.2162	0	0.7347	0.3684	0	0	0.6923	0.68	0.6393	0.7429	0.2143	0.6667	0.8108	0.8947	0.2292	0.2917	0.2292	0.6146	0.2292	0.5521	0.1563	0.5417	0.2813	0.8696	0.8413	0.6667	0.2381	0.117	0.5938	0.6386	0.5132	0.6146	0.2561	0.2791	0.5568	0.5169	0.5054	26
D2HGDH	Candidate gene	0.2917	0.6848	0.4792	0	0.6064	0.5824	0.2162	0	0.7347	0.8526	0.3793	0	0	0	0.6393	0	0	0.6667	0	0.3947	0.6563	0.2083	0.3958	0.6146	0.4375	0.5521	0.625	0.5417	0.1979	0	0	0	0	0.617	0.5938	0.6386	0.5132	0.1458	0.5244	0.7907	0.4886	0.5169	0.5054	27
HSD17B11	Candidate gene	0.3021	0.6522	0.125	0.662	0.6064	0.5824	0.2162	0.7143	0.7347	0.4842	0	0	0	0	0.6393	0	0	0	0	0	0.6563	0.4583	0.75	0.6146	0.375	0.5521	0.625	0.5417	0.375	0	0.9841	0.6349	0.3333	0.617	0.5938	0.1687	0.5132	0.6146	0	0.1047	0.6136	0.5169	0.5054	28
SEPT2	Candidate gene	0.3125	0.3804	0.2708	0.5493	0.6064	0.5824	0.8378	0	0.7347	0.5895	0	0	0	0.68	0.6393	0.7429	0.7714	0	0	0	0.6563	0.7708	0.4583	0.2188	0.7188	0.0938	0.625	0.5417	0.8229	0.4348	0.5714	0.381	0.7143	0.617	0.1354	0.6386	0.5132	0.6146	0.1341	0.1977	0.5455	0.5169	0.5054	29
PRTFDC1	Candidate gene	0.3229	0.8043	0.3438	0.8169	0.6064	0.5824	0	0	0.7347	0.4421	0	0	0	0	0	0	0	0	0	0	0.6563	0.3646	0.3438	0.6146	0.3229	0.5521	0.2083	0.5417	0.375	0	0	0	0	0.617	0.5938	0.6386	0.5132	0.6146	0.5	0.6047	0.2955	0.5169	0.5054	30
PPIC	Candidate gene	0.3333	0.7609	0.3438	0	0.6064	0.5824	0.2162	0.7143	0.7347	0.4316	0	0	0	0	0	0	0.7	0	0	0	0.3021	0.2708	0.75	0.6146	0.375	0.5521	0.625	0.5417	0.2813	0.9565	0.3968	0.6508	0.3492	0.1809	0.5938	0.0964	0.5132	0.6146	0.3537	0.2209	0.7045	0.5169	0.5054	31
HDLBP	Candidate gene	0.3438	0.1196	0.0417	0.3099	0.6064	0.5824	0.4459	0	0.2041	0.4737	0	0	0	0	0.6393	0	0.8	0	0	0	0.0938	0.5208	0.4479	0.6146	0.75	0.5521	0.625	0.5417	0.7396	0.3913	0.8889	0.619	0.5873	0.617	0.125	0.1325	0.5132	0.6146	0.9512	0.686	0.0682	0.5169	0.5054	32
TBC1D23	Candidate gene	0.3542	0.4457	0.8542	0	0.6064	0.5824	0	0	0	0.6421	0	0	0	0	0	0	0	0	0.7027	0	0.6563	0.3125	0.75	0.6146	0.5	0.5521	0.625	0.5417	0.3125	0	0	0	0	0.617	0.5938	0.6386	0.5132	0.6146	0.3171	0.686	0.4659	0.5169	0.5054	33
DTYMK	Candidate gene	0.3646	0.2174	0.3438	0.9577	0.6064	0.5824	0.6081	0.7143	0.4082	0.1579	0.3793	0	0.2308	0.68	0.6393	0.7429	0	0	0	0.9737	0.6563	0.3646	0.4792	0.6146	0.6875	0.5521	0.625	0.5417	0.375	0.413	0.8095	0.5556	0.2857	0.617	0.5938	0.6386	0.5132	0.6146	0.4634	0.6047	0	0.5169	0.5054	34
RPS9	Candidate gene	0.375	0.1957	0.6458	0.4225	0.6064	0.5824	0.6081	0	0	0.2105	0	0.7241	0	0.68	0.6393	0.7429	0.9286	0	0	0	0.6563	0.5521	0.75	0.1979	0.5313	0.5521	0.625	0.5417	0.6042	0	0	0	0	0.617	0.5938	0	0	0.6146	0	0	0.0455	0.5169	0.5054	35
GNE	Candidate gene	0.3854	0.8478	0.1771	0.831	0.6064	0.5824	0.6081	0	0.4082	0.5263	0	0	0.2308	0	0.6393	0	0.5	0.6667	0.3243	0.3684	0.6563	0.4792	0.75	0.6146	0.375	0.5521	0.625	0.5417	0.5729	0.9783	0.2381	0.5397	0.873	0.0638	0.5938	0.1325	0.5132	0.6146	0.1098	0.686	0.2841	0.5169	0.5054	36
TPD52L1	Candidate gene	0.3958	0.3478	0.8542	0.5915	0.6064	0.5824	0.8378	0	0	0.2421	0.8621	0	0	0	0.6393	0	0.5571	0	0	0	0.6563	0.625	0.3021	0.6146	0.4583	0.5521	0.25	0.0521	0.5104	0.7391	0.5556	0.9365	0.4921	0.617	0.0938	0.6386	0.5132	0.6146	0.3659	0.314	0.4205	0.5169	0.5054	37
RPS9	Candidate gene	0.4063	0.1957	0.6458	0.4225	0.6064	0.5824	0	0	0	0.2105	0	0.7241	0	0.68	0.6393	0.7429	0.9286	0	0	0	0.6563	0.5521	0.75	0.1979	0.5313	0.5521	0.625	0.5417	0.6042	0	0	0	0	0.617	0.5938	0	0	0.6146	0	0	0.0455	0.5169	0	38
TAGLN	Candidate gene	0.4167	0.5217	0.8542	0.3803	0.6064	0.5824	0	0	0.7347	0.0526	0	0	0.3077	0.68	0.6393	0	0.5714	0	0.4865	0	0.1771	0.7604	0.2292	0.6146	0.4271	0.5521	0.125	0.5417	0.5417	0.8261	0.8571	0.9841	0.2222	0.1809	0.5938	0.241	0.5132	0.6146	0.5366	0.5814	0.1705	0.5169	0.5054	39
TSEN34	Candidate gene	0.4271	0.9239	0.4792	0	0.6064	0.5824	0.6081	0	0	0.3158	0	0	0	0	0.6393	0	0	0.6667	0	0.6316	0.6563	0.625	0.75	0.6146	0.5938	0.5521	0.625	0.5417	0.6771	0	0.4762	0.4603	0.6667	0.617	0.5938	0.6386	0.5132	0.6146	0.6341	0.9419	0.7841	0.5169	0.5054	40
DCAF11	Candidate gene	0.4375	0.7283	0.8542	0.8028	0.6064	0.5824	0.8378	0	0.7347	0.4947	0	0	0	0	0	0	0	0	0	0	0.6563	0.7917	0.375	0.6146	0.3229	0.5521	0.625	0.0521	0.7917	0.1087	0.381	0.6032	0.4762	0.617	0.0938	0.1325	0.5132	0.6146	0.8049	0.7209	0	0.5169	0.5054	41
MEFV	Candidate gene	0.4479	0.25	0.0729	0.5775	0.1277	0.1319	0.8378	0	0.7347	0.9474	0.5862	0.3793	0.7692	0	0.2459	0.4286	0.1571	0.6667	0.2162	0.8158	0.1354	0.9063	0.1354	0.6146	0.2917	0.5521	0.1563	0.5417	0.375	0	0	0	0	0.617	0.5938	0.6386	0.5132	0.125	0.2317	0.8372	0.8977	0.5169	0.5054	42
HECW1	Candidate gene	0.4583	0.9239	0.3438	0.7183	0.6064	0.5824	0.4459	0	0.7347	0.8842	0	0	0	0	0	0	0.5857	0	0	0	0.6563	0.4583	0.3958	0.6146	0.4375	0.5521	0.625	0.5417	0.5	0.8478	0.0635	0.5079	0.5556	0.617	0.5938	0.6386	0	0.1979	0.7195	0.1628	0.3977	0.5169	0.5054	43
PITX1	Candidate gene	0.4688	0.1739	0.5729	0.2535	0.2128	0.1538	0	0	0.7347	0.5684	0	0	0	0	0	0	0.4286	0.6667	0.6757	0.9211	0.2813	0.4167	0.3229	0.6146	0.2813	0.5521	0.625	0.5417	0.4063	0.5652	1	0.8413	0.8413	0.617	0.5938	0.6386	0.5132	0.6146	0.0732	0.1628	0.1477	0.5169	0.5054	44
NDUFA10	Candidate gene	0.4792	0.6848	0.6875	0.2676	0.6064	0.5824	0.2162	0.7143	0.7347	0.4526	0.3793	0.7241	0.5	0	0.6393	0.7429	0.8571	0.6667	0	0.3947	0.6563	0.7396	0.1563	0.6146	0.3229	0.5521	0.625	0.5417	0.7708	0	0.4444	0.4127	0.9841	0.617	0.5938	0.6386	0.5132	0.2292	0.4268	0.2791	0.9659	0.5169	0.5054	45
TSEN34	Candidate gene	0.4896	0.9239	0.4792	0	0.6064	0.5824	0.6081	0	0	0.3158	0	0	0	0	0.6393	0	0	0.6667	0	0.6316	0.6563	0.625	0.75	0.6146	0.5938	0.5521	0.625	0.5417	0.6771	0	0	0	0	0.617	0.5938	0	0	0.6146	0	0	0.7841	0.5169	0.5054	46
IFT88	Candidate gene	0.5521	0.2391	0.8542	0.493	0.6064	0.5824	0.8378	0	0	0.2316	0	0.7241	0.4615	0.68	0.6393	0.7429	0.9571	0	0.4054	0	0.6563	0.5313	0.75	0.6146	0.6563	0.5521	0.625	0.5417	0.6771	0.8043	0.6508	0.7619	0.7302	0.617	0.5938	0.6386	0.5132	0.6146	0.4024	0.407	0.3068	0.5169	0.5054	52
TBCK	Candidate gene	0.5625	0.4674	0.8542	0.5211	0.1383	0.5824	0.0135	0	0	0.7368	0	0	0	0	0	0	0.9	0	0	0	0.6563	0.3125	0.75	0.6146	0.8854	0.5521	0.625	0.5417	0.3125	0	0	0	0	0.617	0.5938	0.6386	0.5132	0.1354	0.7317	0.686	0	0.5169	0.5054	53
POU2AF1	Candidate gene	0.5729	0.5326	0.2708	0.2394	0.6064	0.5824	0.6081	0	0	0.6211	0	0	0	0	0	0	0.3429	0	0.6486	0	0.6563	0.7083	0.4688	0.6146	0.7083	0.5521	0.625	0.5417	0.7813	0.6087	0.9524	0.1111	0.7937	0.617	0.5938	0.6386	0	0.6146	0.2805	0.9186	0.6591	0.5169	0.5054	54
TSPAN9	Candidate gene	0.5833	0.9239	0.8542	0.2113	0.6064	0.5824	0.2162	0	0	0.8737	0	0	0	0	0	0	0.3286	0	0	0	0.6563	0.1458	0.75	0.6146	0.1771	0.5521	0.625	0.5417	0.1563	0.587	0.4603	0.9206	0.4444	0.617	0.5938	0.6386	0.5132	0.6146	0.6463	0.2209	0.6818	0.5169	0.5054	55
DDX11	Candidate gene	0.5938	0.3261	0.4792	0.8592	0.6064	0.5824	0.8378	0	0	0.6632	0.8621	0	0	0	0	0	0	0.6667	0.5676	0.8421	0.6563	0.5104	0.75	0.6146	0.7292	0.5521	0.625	0.5417	0.5625	0	0.5238	0.746	0.8571	0.617	0.5938	0.6386	0.5132	0.1875	0.878	0.407	0.6023	0.5169	0.5054	56
PPP1R13B	Candidate gene	0.6042	0.4022	0.8542	0.3662	0.6064	0.5824	0.9595	0	0.7347	0.5368	0	0	0	0	0.6393	0.7429	0.8286	0	0.2973	0	0.6563	0.3646	0.2083	0.6146	0.375	0.5521	0.625	0.0729	0.4792	0.913	0.2857	0.7937	0.2698	0.1809	0.1458	0.6386	0.5132	0.6146	0.622	0.1628	0.6477	0.5169	0.5054	57
TSEN34	Candidate gene	0.6146	0.9239	0.4792	0	0.6064	0.5824	0	0	0	0.3158	0	0	0	0	0.6393	0	0	0.6667	0	0.6316	0.6563	0.625	0.75	0.6146	0.5938	0.5521	0.625	0.5417	0.6771	0	0	0	0	0.617	0.5938	0	0	0.6146	0	0	0.7841	0.5169	0	58
TSEN34	Candidate gene	0.625	0.9239	0.4792	0	0.6064	0.5824	0	0	0	0.3158	0	0	0	0	0.6393	0	0	0.6667	0	0.6316	0.6563	0.625	0.75	0.6146	0.5938	0.5521	0.625	0.5417	0.6771	0	0	0	0	0.617	0.5938	0	0	0.6146	0	0	0.7841	0.5169	0	59
RPS9	Candidate gene	0.6354	0.1957	0.6458	0.4225	0.6064	0.5824	0.6081	0	0.4082	0.2105	0.6207	0.7241	0	0.68	0.6393	0.7429	0.9286	0	0	0	0.6563	0.5521	0.5	0.1979	0.5313	0.5521	0.625	0.5417	0.6042	0.7609	0.873	0.7143	0.619	0.617	0.5938	0.6386	0.5132	0.6146	0.8659	0.9767	0.0455	0.5169	0.5054	60
ARHGAP20	Candidate gene	0.6458	0.4891	0.3438	0.6479	0.6064	0.5824	0.6081	0	0	0.5474	0.5172	0	0	0	0.6393	0.7429	0.3714	0	0	0	0.6563	0.9063	0.75	0.1042	0.8854	0.5521	0.625	0.5417	0.9167	0	0	0	0	0.617	0.5938	0.6386	0.5132	0.6146	0.8171	0.407	0.5114	0.5169	0.5054	61
STX12	Candidate gene	0.6563	0.1522	0.5833	0.8873	0.6064	0.5824	0.8378	0	0	0.6842	0.8621	0	0	0	0.6393	0	0	0	0	0	0.6563	0.3646	0.4375	0.6146	0.6667	0.5521	0.625	0.5417	0.4271	0.6739	0.746	0.254	0.3968	0.617	0.5938	0.6386	0	0.6146	0.9268	0.7209	0.2045	0.5169	0.5054	62
CLTA	Candidate gene	0.6667	0.3152	0.8542	0.4507	0.6064	0.5824	0.8378	0	0.7347	0.6526	0.5172	0	0.6154	0.68	0.6393	0.2571	0.9857	0	0	0	0.1563	0.7708	0.3021	0.1458	0.4792	0.5521	0.625	0.5417	0.8021	0.7826	0.7619	0.6825	0.4286	0.617	0.5938	0.6386	0.5132	0.6146	0.5976	0.8605	0.625	0.5169	0.5054	63
KIAA1958	Candidate gene	0.6771	0	0.8542	0	0.6064	0.5824	0	0	0	0.9474	0	0	0	0	0	0	0.5143	0	0	0	0.6563	0.1458	0.75	0.6146	0.1771	0.5521	0.625	0.5417	0.1979	0	0	0	0	0.617	0.5938	0.6386	0.5132	0.6146	0.7073	0.7558	0.5227	0.5169	0.5054	64
LYPLAL1	Candidate gene	0.6875	0.9239	0.2708	0	0.6064	0.5824	0.2162	0	0	0.6	0	0	0	0	0	0	0.2571	0	0	0	0.6563	0.7396	0.75	0.6146	0.3229	0.5521	0.625	0.5417	0.5313	0	0	0	0	0.617	0.5938	0.6386	0	0.6146	0.8293	0.314	0.8636	0.5169	0.5054	65
SLC22A17	Candidate gene	0.6979	0.4239	0.7083	0.9155	0.6064	0.5824	0.6081	0	0	0.7895	0	0	0	0	0	0	0	0	0	0	0.6563	0.2083	0.75	0.6146	0.2292	0.5521	0.625	0.5417	0.1979	0	0.6984	0.8889	0.127	0.617	0.1667	0.6386	0.5132	0.6146	0.7805	0.8953	0.3409	0.5169	0.5054	66
CEP164	Candidate gene	0.7083	0.6196	0.4792	0.8732	0.6064	0.5824	0.8378	0	0.4082	0.8211	0.8621	0	0	0.68	0.6393	0.7429	0.7429	0.6667	0	0	0.6563	0.4271	0.1771	0.6146	0.6875	0.5521	0.625	0.5417	0.4583	0.5435	0.2698	1	0.6349	0.617	0.5938	0.6386	0.5132	0.6146	0.7561	0.814	0.3182	0.5169	0.5054	67
FDX1	Candidate gene	0.7188	0.663	0.5833	0.3239	0.6064	0.5824	0.2162	0.7143	0.1224	0.5579	0.3793	0	0.1538	0	0.6393	0	0.3143	0	0	0.9737	0.6563	0.9063	0.75	0.6146	0.8854	0.5521	0.625	0.5417	0.9167	0.3043	0.7937	0.3333	0.9683	0.617	0.5938	0.253	0.5132	0.6146	0.1463	0.6395	0.5795	0.5169	0.5054	68
IL9	Candidate gene	0.7292	0.1413	0.2396	0.1549	0.6064	0.5824	0.2162	0	0.7347	0.3789	0	0.7241	0.6923	0	0.6393	0.7429	0.2	0	0.7838	0.5	0.2188	0.9063	0.75	0.6146	0.3229	0.5521	0.625	0.5417	0.375	0.4565	0.3651	0.1429	0.9524	0.617	0.5938	0.6386	0.5132	0.6146	0.9878	0.4767	1	0.5169	0.5054	69
GPR35	Candidate gene	0.7396	0.7391	0.8542	0.9014	0.6064	0.5824	0.2162	0	0.4082	0.8632	0	0.7241	0	0	0.6393	0.7429	0.4143	0	0	0	0.6563	0.9063	0.75	0.6146	0.8854	0.5521	0.625	0.5417	0.9167	0.2826	0.2222	0.4921	0.4127	0.617	0.5938	0.6386	0.5132	0.6146	0.6951	0.1047	0.8523	0.5169	0.5054	70
ZC3H12C	Candidate gene	0.75	0.7826	0.8542	0.5352	0.6064	0.5824	0	0	0	0.7684	0	0	0	0	0	0	0.4857	0	0	0	0.6563	0.9063	0.75	0.6146	0.8854	0.5521	0.625	0.5417	0.9167	0	0	0	0	0.617	0.5938	0.6386	0.5132	0.6146	0.4512	0.0349	0.5909	0.5169	0.5054	71
ZNF200	Candidate gene	0.7604	0.5435	0.8542	0.9859	0.1702	0.1648	0	0	0	0.7368	0.6207	0	0	0	0	0	0	0	0	0	0.6563	0.1667	0.125	0.6146	0.1771	0.5521	0.625	0.0521	0.1667	0.8913	0.3175	0.4762	0.6825	0.617	0.0938	0.6386	0	0.6146	1	0.9884	0.7273	0.5169	0.5054	72
STK25	Candidate gene	0.7708	0.2826	0.3438	0.8451	0.1915	0.5824	0.8378	0	0.7347	0.5053	0	0	0	0	0	0	0	0	0	0	0.2604	0.7292	0.75	0.6146	0.7396	0.5521	0.625	0.5417	0.7604	0.3261	0.9683	0.7778	0.8889	0.617	0.5938	0.6386	0.5132	0.6146	0.3902	0.3605	0.5682	0.5169	0.5054	73
PPP1R7	Candidate gene	0.7813	0.5978	0.8542	0.9718	0.6064	0.1429	0	0	0	0.7053	0	0.7241	0	0	0.6393	0	0.7429	0	0	0	0.6563	0.5	0.3646	0.6146	0.6771	0.5521	0.625	0.5417	0.5417	0.6522	0.9206	0.2698	0.8254	0.617	0.5938	0.6386	0.5132	0.6146	0.4756	0.2442	0.9091	0.5169	0.5054	74
ANO7	Candidate gene	0.7917	0.5543	0.8542	0.7606	0.6064	0.5824	0.2162	0	0	0.8316	0.8621	0	0	0	0.6393	0	0	0	0	0	0.6563	0.9063	0.75	0.6146	0.8854	0.5521	0.625	0.5417	0.9167	0	0	0	0	0.617	0.5938	0.0482	0.5132	0.6146	0.4878	0.6512	0	0.5169	0.5054	75
RAB31	Candidate gene	0.8021	0.2609	0.1979	0.7042	0.6064	0.5824	0	0	0.7347	0.6105	0	0	0.2308	0	0	0	0.6857	0	0	0	0.6563	0.7083	0.1771	0.6146	0.2708	0.5521	0.625	0.5417	0.75	0.9348	0.6825	0.5238	0.6508	0.1383	0.5938	0.6386	0.5132	0.6146	0.8902	0.9884	0.9886	0.5169	0.5054	76
FARP2	Candidate gene	0.8125	0.4348	0.8542	0.6338	0.6064	0.5824	0.9595	0	0.7347	0.6737	0.8621	0.7241	0	0.68	0.6393	0.7429	0.6429	0	0.973	0	0.6563	0.3646	0.1771	0.6146	0.2292	0.5521	0.125	0.5417	0.2813	0.5	0.6667	0.8095	0.254	0.617	0.5938	0.6386	0.5132	0.6146	0.7683	0.407	0.9432	0.5169	0.5054	77
KIAA0368	Candidate gene	0.8229	0.7174	0.8542	0.7465	0.6064	0.5824	0.6081	0	0	0.7368	0	0	0	0	0	0	0.6286	0	0	0	0.6563	0.8021	0.4896	0.1563	0.7708	0.5521	0.625	0.5417	0.8125	1	0.4286	0.3016	0.9048	0.1809	0.5938	0.6386	0.5132	0.6146	0.5122	0.407	0.3864	0.5169	0.5054	78
NME8	Candidate gene	0.8333	0.4565	0.8542	0.507	0.6064	0.5824	0	0	0	0.9474	0	0	0	0	0	0	0.4	0.6667	0	0.9737	0.6563	0.2083	0.75	0.6146	0.8854	0.5521	0.625	0.5417	0.1979	0	0.5079	0.2381	0.3651	0.617	0.5938	0.6386	0.5132	0.6146	0.5488	0.9302	0	0	0.5054	79
INIP	Candidate gene	0.8438	0.8261	0.8542	0.9437	0	0	0	0	0	0.5158	0	0	0	0	0	0	0	0	0	0	0.6563	0.3125	0.75	0.6146	0.1771	0.5521	0.625	0.5417	0.3125	0	0	0	0	0	0.5938	0.6386	0	0.6146	0.561	0.6047	0	0	0.5054	80
FGF20	Candidate gene	0.8542	0.1304	0.1667	0.1972	0.6064	0.5824	0	0	0.4082	0.8947	0.6897	0.7241	0.4231	0	0.1639	0.7429	0.8857	0	0.9189	0	0.2708	0.9063	0.75	0.6146	0.8854	0.5521	0.625	0.5417	0.9167	0	0.5397	0.2222	1	0.617	0.5938	0.6386	0.5132	0.6146	0.4146	0.314	0.1136	0.5169	0.5054	81
RNF214	Candidate gene	0.8646	0.7826	0.8542	0	0.6064	0	0.9595	0	0	0.9474	0	0	0	0	0	0	0.6143	0	0	0	0.6563	0.3125	0.75	0.6146	0.1771	0.5521	0.625	0.5417	0.3125	0	0	0	0	0.617	0.5938	0.6386	0.5132	0.6146	0.122	0.8953	0.6364	0.5169	0.5054	82
THAP4	Candidate gene	0.875	0.7826	0.3438	0	0.6064	0.5824	0.9595	0	0.7347	0.7368	0	0	0	0	0	0	0.8714	0	0	0	0.6563	0.2083	0.1771	0.6146	0.8854	0.5521	0.625	0.5417	0.2292	0	0.3333	0.5714	0.9206	0.617	0.5938	0.6386	0.5132	0.6146	0.8537	0.814	0.2386	0.5169	0.5054	83
MCPH1	Candidate gene	0.8854	0.6413	0.3438	0.3521	0.6064	0.5824	0.8378	0	0.7347	0.8105	0	0	0	0	0	0	0.3	0.6667	0.7568	0.7895	0.6563	0.9063	0.4167	0.6146	0.8854	0.5521	0.625	0.5417	0.9167	0	0.1905	0.5873	0.8095	0.617	0.5938	0.6386	0.5132	0.1667	0.1951	0.9535	0.9091	0.5169	0.5054	84
SLC26A8	Candidate gene	0.8958	0.3587	0.6875	0	0.6064	0.5824	0.6081	0	0	0.9474	0	0	0	0	0.6393	0	0.2857	0	0.8378	0	0.6563	0.9063	0.75	0.1146	0.8854	0.5521	0.625	0.5417	0.9167	0	0	0	0	0.617	0.5938	0.6386	0.5132	0.6146	0.2683	0.8372	0.6932	0.5169	0.5054	85
NRIP2	Candidate gene	0.9063	0.4783	0.8542	0.7746	0.6064	0.5824	0.2162	0	0	0.4632	0	0	0	0	0	0	0.6	0	0	0	0.6563	0.9063	0.75	0.6146	0.8854	0.5521	0.625	0.5417	0.9167	0	0.6349	0.0476	0.5397	0.617	0.5938	0.6386	0.5132	0.6146	0.939	0.7558	0.9545	0.5169	0.5054	86
MFSD8	Candidate gene	0.9167	0.5652	0.625	0	0.6064	0.5824	1	0	0	0.2526	0	0	0	0	0.6393	0	0	0.6667	0	0.3158	0.6563	0.9063	0.75	0.6146	0.8854	0.5521	0.625	0.5417	0.9167	0	0	0	0	0.617	0.5938	0.6386	0.5132	0.6146	0.3415	0.7558	0.8864	0.5169	0.5054	87
C11orf53	Candidate gene	0.9271	0	0.8542	0	0	0	0.6081	0	0	0	0	0	0	0	0	0	0.8286	0	0	0	0.6563	0.2083	0.75	0.6146	0.8854	0.5521	0.625	0.5417	0.1979	0	0	0	0	0.617	0.5938	0	0.5132	0.6146	0.9634	0.8721	0.375	0.5169	0.5054	88
TMPRSS13	Candidate gene	0.9375	0.6087	0.8542	0.9296	0.6064	0.5824	0.2162	0	0	0.9474	0	0	0	0	0.6393	0	0.4571	0	0.8649	0	0.6563	0.9063	0.75	0.6146	0.8854	0.5521	0.625	0.5417	0.9167	0	0	0	0	0.617	0.5938	0.6386	0	0.1667	0.3293	0.5233	0.875	0.5169	0.5054	89
NRL	Candidate gene	0.9479	0.2283	0.4792	0.5634	0.6064	0.5824	0.8378	0	0	0.9474	0	0	0	0	0.6393	0	0.7286	0.6667	1	0.8684	0.6563	0.9063	0.75	0.6146	0.8854	0.5521	0.625	0.5417	0.9167	0.5217	0.127	0.1746	0.7619	0.617	0.5938	0.2169	0	0.6146	0.0976	0.6512	0.0909	0.5169	0.5054	90
SIDT2	Candidate gene	0.9583	0.3913	0.6042	0.338	0.6064	0.5824	0.2162	0	0	0.8	0	0	0	0	0	0	0.9857	0	0	0	0.6563	0.9063	0.75	0.6146	0.8854	0.5521	0.625	0.5417	0.9167	0	0.619	0.6984	0.746	0.117	0.5938	0.6386	0.5132	0.6146	0.9756	0.6047	0.25	0.5169	0.5054	91
ITFG2	Candidate gene	0.9688	0	0.8542	0	0.6064	0.5824	0.2162	0	0	0.9474	0	0	0	0	0	0	0	0	0	0	0.6563	0.9063	0.75	0.6146	0.8854	0.5521	0.625	0.5417	0.9167	0.4783	0.1111	0.9683	0.5238	0.617	0.5938	0.6386	0.5132	0.6146	0.7927	0.407	0.7159	0.5169	0.5054	92
ARMC12	Candidate gene	0.9792	0	0.8542	0	0.6064	0.5824	0	0	0	0.9474	0	0	0	0	0	0	0.7143	0	0	0	0.6563	0.9063	0.75	0.6146	0.8854	0.5521	0.625	0.5417	0.9167	0	0	0	0	0.617	0.5938	0.6386	0.5132	0.6146	0.7439	0.7558	0	0	0.5054	93
MEIOB	Candidate gene	0.9896	0.9239	0.8542	0	0.6064	0	0	0	0	0.9474	0	0	0	0	0	0	0	0	0	0	0.2813	0.9063	0.75	0.6146	0.8854	0.5521	0.625	0.5417	0.9167	0	0	0	0	0	0.5938	0	0.5132	0.6146	0.9024	0.9535	0	0	0.5054	94
GAL3ST2	Candidate gene	1	0.9239	0.8542	1	0.6064	0.5824	0.2162	0	0.7347	0.8316	0	0.7241	0	0	0.6393	0	0	0	0	0	0.6563	0.9063	0.75	0.6146	0.8854	0.5521	0.625	0.5417	0.9167	0	0	0	0	0.617	0.5938	0.6386	0.5132	0.6146	0.9146	0.1047	0.9659	0	0.5054	95

## Sheet: WesternPleasure_Metabolism
Gene name	Group	P-value	Annotation â€“ Gene Ontology	Annotation â€“ UniProt	Text-mining	Annotation â€“ InterPro	Annotation â€“ Pfam	Annotation â€“ SIMAP (localization)	Annotation â€“ DrugBank	Annotation â€“ Stitch	Annotation â€“ RGD ChEBI	Annotation â€“ Reactome	Annotation â€“ WikiPathways	Annotation â€“ RGD pathways	Annotation â€“ BioCarta	Annotation â€“ CPDB	Annotation â€“ hiPathDB	Annotation â€“ GAD	Annotation â€“ OMIM	Annotation â€“ RGD MP	Annotation â€“ RGD RDO	Interaction â€“ String	Interaction â€“ BioGrid	Interaction â€“ I2D	Interaction â€“ IntAct	Interaction â€“ iRefIndex	Interaction â€“ Mint	Interaction â€“ HPRD	Interaction â€“ MIPS	Interaction â€“ GeneRIF	Expression â€“ Su et al (2002)	Expression â€“ Su et al (2004)	Expression â€“ CMAP	Expression â€“ Lukk et al	Annotation â€“ PaGenBase	Annotation â€“ CGAP	Annotation â€“ GNF	Annotation â€“ eGenetics	Blast	Precalculated â€“ Ouzounis	Precalculated â€“ Prospectr	Precalculated â€“ HaploPred	Annotation â€“ Aura	Annotation â€“ mirZ	id
APOA2	Training gene	0.0101	0.0101	0.0303	0.0154	0.0632	0.0435	0.2576	0	0.0238	0.0101	0.0263	0.1579	0.0385	0.04	0.0638	0.0313	0.0758	0.24	0.0476	0.0357	0.0303	0.0606	0.0505	0.0505	0.0606	0.0404	0.0505	0.5354	0.0606	0	0.0492	0.0328	0.0492	0.0101	0.0102	0.0519	0	0.1212	0.0548	0.0353	0.0737	0	0.5057	0
APOE	Training gene	0.0202	0.0202	0.0101	0.0308	0.0105	0.0109	0.5303	0.3636	0.0714	0.0202	0.1053	0.0526	0.1154	0.12	0.0213	0.1563	0.0455	0.04	0.0714	0.1071	0.0303	0.0606	0.0505	0.0505	0.0606	0.0404	0.0505	0.0202	0.0606	0.025	0.0328	0.0984	0.0328	0.0303	0.0306	0.039	0.5135	0.0505	0.1233	0.7765	0.3579	0.5269	0.5057	1
INSR	Training gene	0.0303	0.0606	0.0909	0.0923	0.0947	0.0652	0.2576	0.0909	0.2143	0.0909	0.2632	0.2105	0.9615	0.16	0.1915	0.1875	0.0606	0.12	0.1667	0.25	0.101	0.0606	0.0505	0.0505	0.0606	0.0404	0.0505	0.0202	0.0606	0.125	0.1967	0.4262	0.0656	0.1414	0.0714	0.2987	0.5135	0.0505	0.0274	0.1059	0.0105	0.0108	0.5057	2
PPARA	Training gene	0.0404	0.0404	0.4545	0.0769	0.0737	0.1957	0	0.1818	0.0952	0.0404	0.1316	0.3158	0.6154	0.2	0.1489	0.125	0.0303	0.4	0.0238	0.0714	0.0101	0.0606	0.0505	0.0505	0.0606	0.0404	0.0505	0.5354	0.0606	0.075	0.0984	0.2295	0.1148	0.5758	0.1224	0.2597	0.0135	0.0505	0	0.0471	0.3263	0.0215	0.5057	3
APOA5	Training gene	0.0505	0.0303	0.0202	0	0.0105	0.0109	0.5303	0	0.0476	0.1111	0.0526	0.1053	0.0385	0.04	0.0426	0.0625	0.0152	0.2	0.119	0.1429	0.0101	0.0606	0.7576	0.0505	0.0606	0.5556	0.6364	0.0202	0.0606	0	0	0	0	0.0404	0.0714	0.013	0.5135	0.0505	0.6164	0.3059	0.4	0	0.5057	4
TF	Training gene	0.0606	0.2121	0.1515	0.1231	0.0526	0.087	0.2576	0.2727	0.2381	0.0606	0.6842	0.2632	0.9231	0.28	0.1702	0.375	0.1364	0.44	0.2381	0.2143	0.0808	0.0606	0.0505	0.0505	0.0606	0.0404	0.0505	0.5354	0.0606	0.05	0.0164	0.0164	0.0164	0.0202	0.051	0.026	0.5135	0.0505	0.1507	0.1059	0.0947	0.5269	0.5057	5
BDNF	Training gene	0.0707	0.0707	0.0505	0.0615	0.0316	0.0761	0.2576	0	0.1429	0.0808	0	0.3684	0.8077	0.32	0.234	0.25	0.1061	0.08	0.1905	0.2857	0.1111	0.0606	0.0505	0.0505	0.0606	0.0404	0.0505	0.5354	0.0606	0.1	0.1475	0.1803	0.1311	0.1313	0.5714	0.2597	0.5135	0.0505	0.0411	0.5294	0.0316	0.5269	0.5057	6
ZFHX3	Training and candidate gene	0.0808	0.1717	0.5253	0.0462	0.2632	0.0978	0.8182	0	0.2857	0.1414	0	0	0	0.24	0.3191	0.2813	0.1667	0.36	0.3333	0.8929	0.6465	0.0606	0.0505	0.0505	0.0606	0.0404	0.0505	0.5354	0.0606	0	0	0	0	0.0505	0.0918	0.0779	0.5135	0.0505	0.2466	0.0471	0.0526	0.0323	0.5057	7
NLRP3	Training gene	0.0909	0.0808	0.0808	0	0.0842	0.0543	0.0152	0	0.1667	0.1717	0.2368	0.5263	0.8462	0	0.3404	0.4063	0.1515	0.16	0.1429	0.5	0.6465	0.0606	0.0505	0.0505	0.0606	0.5556	0.0505	0.5354	0.0606	0.175	0.2951	0.082	0.082	0.0808	0.5714	0.6494	0.5135	0.0505	0.2055	0.5529	0.2947	0.5269	0.5057	8
PLAGL1	Training gene	0.101	0.1919	0.6263	0.1077	0.2	0.2065	0	0	0	0.0707	0	0	0	0	0	0	0.2576	0.28	0.4286	0	0.6465	0.0606	0.0505	0.6263	0.0606	0.0404	0.0505	0.5354	0.0606	0.15	0.1803	0.1148	0.0984	0.0909	0.5714	0.6494	0.5135	0.0505	0.1781	0.5529	0.5789	0.5269	0.5057	9
GHRL	Training gene	0.1111	0.0505	0.0707	0.1385	0.0421	0.0326	0.2576	0	0.2619	0.0303	0.2105	0	0.7308	0	0.2553	0.3125	0.0909	0.32	0.4762	0.1786	0.1212	0.0606	0.0505	0.6263	0.0606	0.5556	0.0505	0.5354	0.0606	0	0	0	0	0.5758	0.5714	0	0.5135	0.1111	0.0959	0.5059	0.9053	0.5269	0.5057	10
DDX19A	Candidate gene	0.1212	0.2323	0.6667	0	0.6316	0.6087	0	0	0	0.4545	0	0	0	0	0	0	0	0	0	0	0.6465	0.6061	0.4141	0.6263	0.2828	0.5556	0.6364	0.5354	0.6768	0.55	0.377	0.2787	0.3279	0.5758	0.5714	0.6494	0.5135	0.6465	0.3699	0.1765	0.3789	0.5269	0.5057	11
SLC27A1	Candidate gene	0.1313	0.101	0.1717	0	0.6316	0.6087	0.2576	0	0.1905	0.101	0.0789	0	0	0	0.0851	0.0938	0.2273	0	0.0952	0.3214	0.0505	0.3232	0.7576	0.6263	0.8384	0.5556	0.6364	0.5354	0.8788	0	0	0	0	0.5758	0.5714	0.6494	0.5135	0.2525	0.2192	0.1059	0.8737	0.5269	0.5057	12
KIF5B	Candidate gene	0.1414	0.1313	0.3535	0.6615	0.6316	0.6087	0.8182	0.7273	0.381	0.1818	0.3947	0.4737	0.3846	0.68	0.6809	0.7188	0.6212	0	0.2619	0	0.6465	0.7172	0.4545	0.2424	0.596	0.5556	0.2424	0.5354	0.7576	0.225	0.4262	0.3607	0.7541	0.5758	0.0306	0.6494	0.5135	0.6465	0.2603	0.1765	0.1579	0.5269	0.5057	13
CCNY	Candidate gene	0.1515	0.2525	0.4848	0	0.6316	0.6087	0.6212	0	0	0.697	0	0	0	0	0	0	0.4697	0	0	0	0.2525	0.1818	0.1818	0.6263	0.3232	0.5556	0.6364	0.5354	0.2525	0	0	0	0	0.5758	0.5714	0.6494	0.5135	0.6465	0.6575	0.2588	0.4632	0.5269	0.5057	14
GRIK2	Candidate gene	0.1616	0.1212	0.4444	0.2154	0.6316	0.6087	0.2576	0.7273	0.7143	0.2323	0.8421	0	0.3846	0	0.6809	0.7188	0.2879	0.72	0.5952	0.4643	0.1616	0.6364	0.4848	0.6263	0.6364	0.5556	0.6364	0.5354	0.7172	0.775	0.4918	0.1639	0.6066	0.5758	0.5714	0.6494	0.5135	0.6465	0.5205	0.5882	0.2	0.5269	0.5057	15
SORL1	Candidate gene	0.1717	0.1414	0.0404	0.2923	0.1263	0.2174	0.2576	0	0.7143	0.2727	0	0	0	0	0	0	0.2424	0.72	0.619	0.8571	0.0909	0.8586	0.3232	0.1515	0.8384	0.5556	0.6364	0.5354	0.8788	0.65	0.7541	0.5082	0.377	0.0606	0.5714	0.1948	0.5135	0.1717	0.1918	0.0118	0.0421	0.5269	0.5057	16
GRM7	Candidate gene	0.1818	0.2424	0.1818	0.1692	0.6316	0.6087	0.2576	0.7273	0.7143	0.8283	0.3158	0.7895	0.3846	0	0.2128	0.7188	0.2727	0	0.4524	0	0.202	0.4444	0.2121	0.6263	0.2222	0.5556	0.1616	0.5354	0.3232	0.825	0.082	0.459	0.5902	0.5758	0.5714	0.6494	0.5135	0.2323	0	0.5882	0.1053	0.5269	0.5057	17
PARD3	Candidate gene	0.1919	0.1616	0.3535	0.3385	0.6316	0.6087	0.9545	0	0	0.1515	0.3158	0	0.3846	0.68	0.6809	0.7188	0.5606	0	0.3095	0	0.1919	0.6869	0.2929	0.202	0.4141	0.5556	0.1919	0.5354	0.6364	0.475	0.1311	0.7705	0.3934	0.5758	0.5714	0.2597	0.5135	0.202	0.1644	0.6941	0.1789	0.5269	0.5057	18
FAS	Candidate gene	0.202	0.0909	0.0606	0.1538	0.1158	0.6087	0.2576	0	0.7143	0.0505	0.8421	0.4211	1	0.68	0.2979	0.4375	0.1212	0.72	0.4048	0.3571	0.2121	0.3939	0.2525	0.2323	0.2626	0.5556	0.2424	0.0505	0.3838	0.7	0.2623	0.8689	0.4918	0.5758	0.5714	0.6494	0.5135	0.6465	0.0822	0.6588	0.8	0.0538	0.5057	19
NTM	Candidate gene	0.2121	0.4747	0.2727	0.2308	0.6316	0.6087	0.2576	0	0.7143	0.4444	0	0	0	0	0	0	0.3485	0	0	0	0.2323	0.3636	0.1111	0.6263	0.8384	0.5556	0.6364	0.5354	0.4141	0	0.6885	0.3115	0.2131	0.5758	0.5714	0.6494	0	0.6465	0.1096	0.2235	0	0.5269	0.5057	20
U2AF2	Candidate gene	0.2222	0.3737	0.2525	0.6462	0.6316	0.6087	0.9545	0	0.7143	0.6869	0.5263	0.7895	0.1538	0.68	0.6809	0.7188	0	0	0	0	0.6465	0.6667	0.3131	0.2121	0.5758	0.5556	0.2626	0.0707	0.7071	0.575	0.2295	0.5902	0.2623	0.5758	0.5714	0.6494	0.5135	0.6465	0.4521	0.6824	0.2105	0.5269	0.5057	21
GLG1	Candidate gene	0.2323	0.303	0.5354	0.4	0.6316	0.6087	0.2576	0	0	0.2424	0	0	0	0	0.6809	0.7188	0.7727	0	0.6667	0	0.2626	0.5354	0.7576	0.6263	0.3434	0.5556	0.6364	0.5354	0.5758	0.325	0.2459	0.6066	0.8361	0.5758	0.1224	0.1429	0.5135	0.6465	0.3288	0.6118	0.5368	0.5269	0.5057	22
OPCML	Candidate gene	0.2424	0.4848	0.1616	0.3077	0.6316	0.6087	0.2576	0	0	0.7677	0	0	0	0	0	0	0.4545	0.72	0	0	0.2222	0.8586	0.4444	0.6263	0.6061	0.5556	0.1212	0.5354	0.2828	0.75	0.3115	0.3279	0.2459	0.1111	0.5714	0	0.5135	0.6465	0.5616	0.2941	0.1684	0.5269	0.5057	23
AARS	Candidate gene	0.2525	0.1818	0.4646	0.6769	0.6316	0.6087	0.8182	0.7273	0.7143	0.2828	0.5263	0	0	0.68	0.6809	0.7188	0	0.72	0.8571	0.8214	0.6465	0.5758	0.4646	0.1313	0.6768	0.5556	0.6364	0.5354	0.6465	0.375	0.4754	0.7049	0.4754	0.5758	0.5714	0.1429	0.5135	0.6465	0.4795	0.4824	0.3053	0.5269	0.5057	24
PIP4K2A	Candidate gene	0.2626	0.5253	0.2525	0.1846	0.6316	0.6087	0	0	0.381	0.7778	0.1579	0.7895	0.3846	0.68	0.1277	0.7188	0.5303	0	0	0	0.6465	0.3232	0.7576	0.6263	0.404	0.5556	0.6364	0.5354	0.5758	0.45	0.8361	0.6557	0.2951	0.5758	0.5714	0.6494	0.5135	0.6465	0.726	0.3647	0.7684	0.5269	0.5057	25
NOC3L	Candidate gene	0.2727	0.6869	0.8485	0.3231	0.6316	0.6087	0.5	0	0	0.6263	0	0	0	0	0	0	0.6061	0	0	0	0.6465	0.5051	0.5051	0.6263	0.6667	0.5556	0.6364	0.5354	0.4848	0	0.7705	0.3934	0.4098	0.5758	0.5714	0.6494	0	0.6465	0.5753	0.4353	0.3158	0.5269	0.5057	26
PPIC	Candidate gene	0.2828	0.7475	0.3535	0	0.6316	0.6087	0.2576	0.7273	0.7143	0.2525	0	0	0	0	0	0	0.7121	0	0	0	0.2929	0.2727	0.7576	0.6263	0.3232	0.5556	0.6364	0.5354	0.3131	0.85	0.3934	0.6885	0.3607	0.1111	0.5714	0.0779	0.5135	0.6465	0.3836	0.2	0.7579	0.5269	0.5057	27
CDH5	Candidate gene	0.2929	0.4242	0.4343	0.4923	0.6316	0.6087	0.2576	0.7273	0.7143	0.202	0.8421	0	0.3846	0.68	0.6809	0.7188	0	0	0.6429	0.6786	0.1414	0.3838	0.2424	0.6263	0.3131	0.1111	0.1717	0.5354	0.3939	0.975	0.8197	0.1475	0.3443	0.5758	0.5714	0.2338	0.5135	0.6465	0.4384	0.1059	0.1895	0.5269	0.5057	28
SNX24	Candidate gene	0.303	0.4343	0.5051	0	0.6316	0.6087	0.2576	0	0	0.6667	0	0	0	0	0	0	0.6515	0	0	0	0.6465	0.3232	0.7576	0.6263	0.8384	0.5556	0.6364	0.5354	0.4141	0	0.6557	0.623	0.3115	0.5758	0.5714	0.6494	0.5135	0.6465	0.3151	0.8118	0.4842	0.5269	0.5057	29
DDX19B	Candidate gene	0.3131	0.4444	0.5051	0.8615	0.6316	0.6087	0.6212	0	0.381	0.9495	0	0	0	0	0	0	0	0	0	0	0.2828	0.5354	0.4949	0.6263	0.5253	0.5556	0.2323	0.5354	0.6162	0	0	0	0	0.5758	0.5714	0	0.5135	0.6465	0.3014	0.3647	0.4421	0.5269	0.5057	30
HDDC2	Candidate gene	0.3232	0.798	0.3535	0.7846	0.6316	0.6087	0.6212	0	0.7143	0.5051	0	0	0	0	0	0	0.6818	0	0	0	0.6465	0.1818	0.404	0.6263	0.4646	0.5556	0.6364	0.5354	0.1818	0.3	0.4098	0.4754	0.6721	0.5758	0.5714	0.6494	0.5135	0.6465	0.589	0.6353	0.8842	0.5269	0.5057	31
MYO6	Candidate gene	0.3333	0.1111	0.5657	0.4154	0.6316	0.6087	0.8182	0	0	0.899	0.8421	0	0.3846	0.68	0.6809	0.7188	0.7576	0.72	0.2143	0.3929	0.1717	0.6364	0.2222	0.2121	0.3939	0.5556	0.1818	0.5354	0.5556	0.725	0.6393	0.5738	0.1967	0.5758	0.5714	0.6494	0	0.6465	0	0.1765	0.4211	0.5269	0.5057	32
GRIK4	Candidate gene	0.3434	0.4949	0.6162	0.2	0.6316	0.6087	0.2576	0.7273	0	0.2626	0.8421	0	0.3846	0	0.6809	0.7188	0.3788	0	0.5714	0	0.6465	0.2727	0.7576	0.6263	0.8384	0.5556	0.6364	0.5354	0.3434	0	0.7213	0.1311	0.5738	0.5758	0.5714	0.6494	0	0.6465	0.7671	0.3882	0.4316	0	0	33
RPS5	Candidate gene	0.3535	0.2222	0.596	0.9231	0.6316	0.6087	0	0	0.381	0.7071	0.5263	0.7895	0	0.68	0.6809	0.7188	0	0	0	0	0.6465	0.697	0.4343	0.1515	0.6566	0.5556	0.6364	0.5354	0.7374	0.525	0.6721	0.5246	0.5246	0.5758	0.102	0.1948	0.5135	0.6465	0.5479	0.8706	0.0211	0.5269	0.5057	34
TPD52L1	Candidate gene	0.3636	0.2727	0.8485	0.5846	0.6316	0.6087	0.8182	0	0	0.1616	0.8421	0	0	0	0.6809	0	0.5758	0	0	0	0.6465	0.596	0.2828	0.6263	0.3737	0.5556	0.2121	0.0404	0.5758	0.675	0.623	0.918	0.5082	0.5758	0.0714	0.6494	0.5135	0.6465	0.4247	0.3294	0.3474	0.5269	0.5057	35
UBASH3B	Candidate gene	0.3737	0.9192	0.2525	0.5077	0.6316	0.6087	0.6212	0	0.119	0.798	0	0	0	0	0	0	0.3939	0	0	0	0.6465	0.5758	0.1818	0.1717	0.2323	0.5556	0.1212	0.5354	0.6061	0	0	0	0	0.5758	0.5714	0.6494	0.5135	0.6465	0.9726	0.4353	0.6105	0.5269	0.5057	36
PGLS	Candidate gene	0.3838	0.9192	0.596	0	0.6316	0.6087	0.2576	0	0.7143	0.4343	0.2895	0.7895	0.7692	0.68	0.6809	0.7188	0	0	0	0	0.6465	0.5354	0.4747	0.6263	0.6263	0.5556	0.6364	0.5354	0.5758	0	0.918	0.5574	0.541	0.5758	0.5714	0.1948	0.5135	0.6465	0.411	0.6353	0.2421	0.5269	0.5057	37
MTO1	Candidate gene	0.3939	0.7576	0.4747	0.4615	0.6316	0.6087	0.6212	0	0.7143	0.4141	0	0	0	0	0	0	0.5	0.72	0	0	0.6465	0.1818	0.3737	0.6263	0.5556	0.5556	0.6364	0.5354	0.1818	0	0.9344	0.2951	0.5574	0.5758	0.5714	0.6494	0	0.6465	0.2329	0.2471	0.9368	0.5269	0.5057	38
ZNF329	Candidate gene	0.404	0.5657	0.8485	0	0.2	0.1522	0	0	0	0.2222	0	0	0	0	0	0	0.7424	0	0	0	0.6465	0.1818	0.1414	0.6263	0.1515	0.0909	0.1212	0.5354	0.1818	0	0.6066	0.7213	0.7377	0.5758	0.5714	0.6494	0.5135	0.6465	0.8082	0.9529	0.5368	0.5269	0.5057	39
SLC17A5	Candidate gene	0.4141	0.3333	0.5657	0.7538	0.6316	0.6087	0.9848	0	0.3095	0.4242	0.8421	0	0	0.68	0.6809	0.7188	0.9242	0.72	0.3571	0.6429	0.2626	0.1212	0.7576	0.6263	0.202	0.5556	0.6364	0.5354	0.1212	0	0.0656	0.8525	0.623	0.5758	0.5714	0.0779	0.5135	0.6465	0.137	0.1412	0.5263	0.043	0.5057	40
CD109	Candidate gene	0.4242	0.7071	0.2727	0	0.6316	0.6087	0.2576	0	0	0.5859	0	0	0	0	0	0	0.3333	0	0.881	0	0.6465	0.8586	0.7576	0.6263	0.8384	0.5556	0.6364	0.5354	0.8788	0	0	0	0	0.5758	0.5714	0.6494	0.5135	0.6465	0.0137	0.1059	0.3895	0.5269	0.5057	41
TTYH1	Candidate gene	0.4343	0.6364	0.6667	0.9538	0.6316	0.6087	0.6212	0	0	0.3939	0.8421	0	0	0	0.6809	0	0	0	0.7857	0	0.6465	0.1818	0.1414	0.6263	0.1515	0.5556	0.6364	0.5354	0.1818	0	0.7377	0.2131	0.1639	0.5758	0.5714	0.6494	0.5135	0.6465	0.3973	0.8471	0.2632	0.5269	0.5057	42
JAKMIP1	Candidate gene	0.4444	0.3636	0.6667	0	0.6316	0	0.8182	0	0	0.8182	0	0.7895	0	0	0.6809	0	0.4848	0	0	0	0.6465	0.8586	0.3535	0.6263	0.5253	0.5556	0.2121	0.5354	0.6667	0	0	0	0	0.5758	0.5714	0.6494	0.5135	0.6465	0.7945	0.1412	0.1368	0.5269	0.5057	43
CFDP1	Candidate gene	0.4545	0.3838	0.8485	0.5231	0.6316	0.6087	0	0	0	0.7475	0	0	0	0	0	0	0.6212	0	0	0	0.6465	0.2727	0.2222	0.6263	0.1919	0.0909	0.1515	0.5354	0.1818	0.25	0.8852	0.541	0.9508	0.5758	0.5714	0.6494	0.5135	0.6465	0	0.7529	0.0842	0.5269	0.5057	44
KIAA1217	Candidate gene	0.4646	0.4646	0.8485	0.3846	0.6316	0.6087	0.8182	0	0	0.5152	0	0	0	0	0	0	0.4242	0	0.7143	0	0.6465	0.5556	0.3535	0.6263	0.8384	0.5556	0.6364	0.5354	0.6263	0	0	0	0	0.5758	0.5714	0.6494	0.5135	0.1818	0.9041	0.4353	0.4526	0.5269	0.5057	45
ZNF667	Candidate gene	0.4747	0.5657	0.8485	0.5385	0.2	0.1522	0	0	0	0.8485	0.5263	0	0	0	0	0	0.7879	0	0	0	0.6465	0.1818	0.1414	0.6263	0.1212	0.5556	0.6364	0.5354	0.1818	0	0.541	0.8197	0.6885	0.5758	0.5714	0.6494	0.5135	0.1414	0	0.9529	0.5684	0.5269	0.5057	46
FCAR	Candidate gene	0.4848	0.8182	0.1313	0.2615	0.6316	0.6087	0.2576	0	0.7143	0.6061	0	0	0.6154	0	0.6809	0	0.197	0	0	0.5714	0.1717	0.8586	0.3434	0.1111	0.8384	0.5556	0.6364	0.5354	0.8788	0.275	0.1148	0.0492	0.2787	0.5758	0.5714	0.1429	0.5135	0.6465	0	0.7765	0.9684	0.5269	0.5057	47
COG4	Candidate gene	0.4949	0.3434	0.2323	0.9077	0.6316	0.6087	0.8182	0	0.7143	0.1919	0	0	0	0	0	0	0	0.72	0	0.7143	0.1515	0.6162	0.7576	0.6263	0.6061	0.5556	0.6364	0.5354	0.6869	0.625	0.5902	0.7377	0.9836	0.5758	0.0306	0.6494	0.5135	0.6465	0.3562	0.6941	0.4105	0.5269	0.5057	48
EPS8L1	Candidate gene	0.5051	0.9192	0.3535	0	0.6316	0.6087	0	0	0	0.3333	0	0	0	0	0	0	0	0	0	0	0.6465	0.4444	0.7576	0.6263	0.4646	0.5556	0.6364	0.5354	0.4848	0	0	0	0	0.5758	0.5714	0	0	0.6465	0	0	0.7053	0.5269	0.5057	49
SLC35F3	Candidate gene	0.5152	0.697	0.6667	0	0.6316	0.6087	0.2576	0	0	0.8485	0	0	0	0	0	0	0.3182	0	0	0	0.6465	0.1818	0.7576	0.6263	0.8384	0.5556	0.6364	0.5354	0.1818	0	0	0	0	0.5758	0.5714	0.6494	0	0.6465	0.7808	0.8	0.6316	0.5269	0.5057	50
STX12	Candidate gene	0.5253	0.1515	0.5051	0.8769	0.6316	0.6087	0.8182	0	0	0.5758	0.8421	0	0	0	0.6809	0	0	0	0	0	0.6465	0.3636	0.3838	0.6263	0.5859	0.5556	0.6364	0.5354	0.4848	0.6	0.7869	0.3443	0.459	0.5758	0.5714	0.6494	0	0.6465	0.9178	0.7176	0.1474	0.5269	0.5057	51
CLNS1A	Candidate gene	0.5354	0.2929	0.596	0.7692	0.6316	0.6087	0	0	0.7143	0.6768	0.5263	0	0	0.68	0.6809	0.7188	0.9242	0	0.7857	0	0.6465	0.7071	0.7576	0.1919	0.5455	0.5556	0.6364	0.5354	0.7475	0.2	0.9672	0.4098	0.6557	0.5758	0.5714	0.6494	0.5135	0.6465	0.5342	0.6353	0.8105	0.5269	0.5057	52
TTYH1	Candidate gene	0.5455	0.6364	0.6667	0.9538	0.6316	0.6087	0	0	0	0.3939	0	0	0	0	0.6809	0	0	0	0.7857	0	0.6465	0.1818	0.7576	0.6263	0.1515	0.5556	0.6364	0.5354	0.1818	0	0	0	0	0.5758	0.5714	0	0	0.6465	0	0	0.2632	0.5269	0	53
EPS8L1	Candidate gene	0.5657	0.9192	0.3535	0	0.6316	0.6087	0	0	0	0.3333	0	0	0	0	0	0	0	0	0	0	0.6465	0.4444	0.7576	0.6263	0.4646	0.5556	0.6364	0.5354	0.4848	0	0	0	0	0.5758	0.5714	0	0	0.6465	0	0	0.7053	0.5269	0	55
NLRP5	Candidate gene	0.6465	0.404	0.8485	0	0.1053	0.1087	0.2576	0	0	0.5455	0	0	0	0	0	0	0.4091	0	0.6905	0	0.6465	0.1818	0.7576	0.6263	0.1515	0.5556	0.6364	0.5354	0.1818	0	0	0	0	0.5758	0	0.6494	0	0.101	0.863	0.8588	0.9474	0.5269	0.5057	63
SEMA3E	Candidate gene	0.6566	0.2828	0.2121	0.6154	0.6316	0.6087	0.2576	0	0	0.6364	0.8421	0	0	0.68	0.6809	0.7188	0.5909	0.72	1	0.4286	0.6465	0.8586	0.7576	0.6263	0.8384	0.5556	0.6364	0.5354	0.8788	0.5	0.8033	0.2459	0.8852	0.5758	0.5714	0.6494	0.5135	0.2222	0.274	0.0118	0.8632	0.5269	0.5057	64
TECTA	Candidate gene	0.6667	0.6667	0.101	0.8462	0.6316	0.6087	0.2576	0	0	0.8485	0	0	0	0	0	0	0.3636	0.72	0.9286	0.75	0.1313	0.8586	0.7576	0.6263	0.8384	0.5556	0.6364	0.5354	0.8788	0	0.5738	0.2623	0.7049	0.5758	0.5714	0.6494	0.5135	0.6465	0.0685	0.0706	0.1158	0	0	65
SF3B3	Candidate gene	0.6768	0.6566	0.8485	0.5385	0.6316	0.6087	0.6212	0	0	0.8788	0.5263	0.7895	0.1538	0	0.6809	0.7188	0.9242	0	0	0	0.6465	0.6768	0.4242	0.1818	0.6465	0.5556	0.6364	0.0606	0.7273	0	0.9836	0.4426	0.4426	0.5758	0.1224	0.2208	0.5135	0.2626	0	0.4824	0.0632	0.5269	0.5057	66
DDX28	Candidate gene	0.6869	0.7576	0.8485	0.8308	0.6316	0.6087	0.0152	0	0	0.7273	0	0	0	0	0	0	0	0	0	0	0.6465	0.8586	0.7576	0.6263	0.8384	0.5556	0.6364	0.5354	0.8788	0.875	0.4426	0.8361	0.1803	0.5758	0.5714	0.2597	0.5135	0.6465	0.3425	0.2235	0.9263	0.5269	0.5057	67
UNC79	Candidate gene	0.697	0.3939	0.8485	0.4462	0.6316	0.6087	0	0	0	0.9495	0.8421	0	0	0	0.6809	0	0.6818	0	0.381	0	0.6465	0.3232	0.1818	0.1111	0.8384	0.5556	0.6364	0.5354	0.3434	0	0	0	0	0.5758	0.5714	0.6494	0.5135	0.6465	0.8356	0.2706	0	0	0.5057	68
IMPG1	Candidate gene	0.7071	0.6667	0.1919	0.5692	0.6316	0.6087	0.2576	0	0.7143	0.4646	0	0	0	0	0	0	0.303	0	0	0	0.6465	0.8586	0.7576	0.6263	0.8384	0.5556	0.6364	0.5354	0.8788	0.95	0.5246	0.1967	0.8525	0.5758	0.5714	0.6494	0	0.6465	0.8219	0.3059	0.3368	0.5269	0.5057	69
ZNF8	Candidate gene	0.7172	0.4545	0.8485	0	0.2	0.1522	0	0	0	0.6566	0	0	0	0	0	0	0	0	0	0	0.6465	0.8586	0.1414	0.6263	0.3636	0.5556	0.1414	0.5354	0.3636	0	0.2131	0.8852	0.8197	0.5758	0.5714	0.6494	0.5135	0.6465	0.8767	0.9529	0.4737	0.5269	0.5057	70
KLK4	Candidate gene	0.7273	0.5152	0.1111	0.3538	0.6316	0.6087	0.2576	0	0.7143	0.9495	0	0	0	0.68	0.6809	0	0.8182	0.72	0.5476	0.7857	0.6465	0.8586	0.7576	0.6263	0.8384	0.5556	0.6364	0.5354	0.8788	0	0	0	0	0.5758	0.5714	0.6494	0.5135	0.6465	0.4658	0.3412	0.8316	0.5269	0.5057	71
LENG8	Candidate gene	0.7374	0.7172	0.8485	0	0.6316	0.6087	0	0	0	0.5556	0	0	0	0	0	0	0	0	0	0	0.6465	0.8586	0.7576	0.6263	0.8384	0.5556	0.6364	0.5354	0.8788	0	0	0	0	0.5758	0.5714	0	0.5135	0.6465	0.6438	0.8235	0.5895	0.5269	0.5057	72
GLE1	Candidate gene	0.7475	0.3535	0.5657	0.6923	0.6316	0.6087	0.8182	0	0.7143	0.9495	0	0	0	0	0	0	0.9242	0.72	0.7381	0.9286	0.6465	0.3232	0.7576	0.6263	0.3434	0.5556	0.6364	0.5354	0.3434	0.4	0.2787	0.9508	0.2295	0.5758	0.5714	0.6494	0.5135	0.6465	0	0.4353	0.2842	0.5269	0.5057	73
DYRK3	Candidate gene	0.7576	0.3131	0.8485	0.7077	0.1368	0.6087	0	0	0	0.5253	0	0	0	0	0.6809	0	0	0	0.9524	0	0.6465	0.8586	0.7576	0.6263	0.2424	0.5556	0.6364	0.5354	0.2828	0	0	0	0	0.5758	0.5714	0	0	0.6465	0	0	0.5053	0.5269	0.5057	74
PRIMA1	Candidate gene	0.7677	0.6162	0.5354	0.6308	0	0	0.2576	0	0.7143	0.4949	0	0	0	0	0	0	0.6818	0	0.2857	0	0.6465	0.8586	0.7576	0.6263	0.8384	0.5556	0.6364	0.5354	0.8788	0	0	0	0	0.5758	0.5714	0	0.5135	0.2929	0.9452	0.5059	0.5579	0.5269	0.5057	75
TBCEL	Candidate gene	0.7778	0.9192	0.8485	0	0.6316	0.6087	0.8182	0	0	0.7576	0	0	0	0	0	0	0.9242	0	0	0	0.6465	0.1818	0.7576	0.6263	0.1515	0.5556	0.6364	0.5354	0.1818	0	0.3279	0.9344	0.6393	0.5758	0.5714	0.6494	0.5135	0.2121	0.6849	0.4353	0.2211	0.5269	0.5057	76
VAC14	Candidate gene	0.7879	0.2626	0.8485	0.7385	0.6316	0.6087	0.8182	0	0.7143	0.6465	0.1579	0	0	0	0.1064	0	0.9242	0	0.5238	0	0.6465	0.6364	0.3333	0.6263	0.8384	0.5556	0.6364	0.5354	0.6869	0	0.3607	0.9672	0.9672	0.5758	0.5714	0.1429	0.5135	0.1919	0.5068	0.4353	0.4842	0.5269	0.5057	77
ZNF274	Candidate gene	0.798	0.6061	0.8485	0.8	0.2	0.1522	0	0	0.7143	0.1313	0.5263	0	0.3846	0.36	0.6809	0.2188	0	0	0	0	0.0606	0.8586	0.2626	0.1414	0.2828	0.5556	0.6364	0.5354	0.8788	0.35	0.7049	0.7541	0.8033	0.1111	0.5714	0.6494	0.5135	0.6465	0.9315	0.9529	0.9053	0.5269	0.5057	78
LENG8	Candidate gene	0.8081	0.7172	0.8485	0	0.6316	0.6087	0	0	0	0.5556	0	0	0	0	0	0	0	0	0	0	0.6465	0.8586	0.7576	0.6263	0.8384	0.5556	0.6364	0.5354	0.8788	0	0	0	0	0.5758	0.5714	0	0	0.6465	0	0	0.5895	0.5269	0.5057	79
NAT14	Candidate gene	0.8182	0.202	0.6263	0.8923	0.6316	0.6087	0.9848	0	0	0.2121	0	0.7895	0	0	0.6809	0	0	0	0	0	0.6465	0.3636	0.7576	0.6263	0.2828	0.5556	0.6364	0.5354	0.4141	0	0	0	0	0.5758	0.5714	0.6494	0.5135	0.2828	0	0.9059	0.7789	0.5269	0.5057	80
ZNF784	Candidate gene	0.8283	0.5657	0.8485	0	0.2	0.6087	0.6212	0	0	0.7172	0	0	0	0	0	0	0.5152	0	0	0	0.6465	0.8586	0.7576	0.6263	0.8384	0.5556	0.6364	0.5354	0.8788	0	0	0	0	0.5758	0.5714	0.6494	0.5135	0.6465	0.4932	0.9529	0.6526	0.5269	0.5057	81
BHLHE40	Candidate gene	0.8384	0.4141	0.8485	0.3692	0.6316	0.6087	0	0	0.7143	0.1212	0.3684	0.7895	0.8846	0.68	0.2766	0.3438	0.4394	0	0.9048	1	0.0707	0.2525	0.2727	0.6263	0.2121	0.5556	0.6364	0.5354	0.303	0.9	0.8525	0.9016	0.918	0.0606	0.5714	0.6494	0.5135	0.6465	0.7123	0.4353	0	0.5269	0.5057	82
FCAR	Candidate gene	0.8485	0.8182	0.1313	0.2615	0.6316	0	0	0	0	0.6061	0	0	0.6154	0	0.6809	0	0.197	0	0	0.5714	0.6465	0.8586	0.7576	0.1111	0.8384	0.5556	0.6364	0.5354	0.8788	0	0	0	0	0.5758	0.5714	0	0	0.6465	0	0	0.9684	0.5269	0.5057	83
ZNF583	Candidate gene	0.8586	0.5657	0.8485	0	0.2	0.1522	0	0	0	0.8687	0.5263	0	0	0	0	0	0	0	0	0	0.6465	0.8586	0.7576	0.6263	0.8384	0.5556	0.6364	0.5354	0.8788	0	0	0	0	0.5758	0.5714	0.6494	0.5135	0.6465	0	0.9529	0.6421	0.5269	0.5057	84
HYDIN	Candidate gene	0.8687	0.9192	0.3535	0.8154	0.6316	0.6087	0.8182	0	0	0.8889	0	0	0	0	0	0	0.9242	0.72	0	0.9643	0.6465	0.1818	0.7576	0.6263	0.8384	0.5556	0.6364	0.5354	0.1818	0	0.459	0.0656	0.7213	0.5758	0.5714	0.0779	0.5135	0.6465	0.7534	0.5529	0	0.5269	0.5057	85
ZNF544	Candidate gene	0.8788	0.5657	0.8485	0	0.2	0.6087	0	0	0	0.7374	0.5263	0	0	0	0	0	0.9242	0	0	0	0.6465	0.8586	0.7576	0.6263	0.8384	0.5556	0.6364	0.5354	0.8788	0	0.1639	0.6393	0.8689	0.5758	0.5714	0.6494	0.5135	0.1515	0	0.9529	0.1263	0.5269	0.5057	86
KIAA1191	Candidate gene	0.8889	0.9192	0.8485	1	0.6316	0.6087	0	0	0	0.9495	0	0	0	0	0	0	0.8485	0	0	0	0.6465	0.5556	0.1818	0.6263	0.3737	0.5556	0.6364	0.5354	0.3636	0	0	0	0	0.5758	0.5714	0	0.5135	0.2424	0.6301	0.7176	0.3684	0.5269	0.5057	87
FCAR	Candidate gene	0.899	0.8182	0.1313	0.2615	0	0	0	0	0	0.6061	0	0	0.6154	0	0.6809	0	0.197	0	0	0.5714	0.6465	0.8586	0.7576	0.6263	0.8384	0.5556	0.6364	0.5354	0.8788	0	0	0	0	0.5758	0.5714	0	0	0.6465	0	0	0.9684	0.5269	0	88
ZNF581	Candidate gene	0.9091	0.5657	0.8485	0	0.2	0.1522	0.6212	0	0	0.9495	0	0	0	0	0	0	0.5455	0	0	0	0.6465	0.6364	0.7576	0.6263	0.8384	0.5556	0.6364	0.5354	0.6465	0	0	0	0	0.5758	0.5714	0	0.5135	0.6465	1	0.9529	0.6211	0.5269	0.5057	89
ZNF530	Candidate gene	0.9192	0.5657	0.8485	0	0.2	0.1522	0.6212	0	0	0.4747	0.5263	0	0	0	0	0	0	0	0	0	0.6465	0.8586	0.7576	0.6263	0.8384	0.5556	0.6364	0.5354	0.8788	0	0	0	0	0.5758	0.5714	0	0.5135	0.1313	0.9863	0.8941	0.8526	0.5269	0.5057	90
CCDC106	Candidate gene	0.9293	0.9192	0.8485	0.9846	0	0	0.8182	0	0	0.8081	0	0	0	0	0	0	0	0	0	0	0.6465	0.5051	0.3838	0.6263	0.5556	0.5556	0.2121	0.5354	0.5455	0.425	0.8689	0.7869	0.1475	0.5758	0.5714	0.6494	0.5135	0.1616	0.8493	0.8235	0.8211	0.5269	0.5057	91
PMFBP1	Candidate gene	0.9394	0.9192	0.8485	0	0	0	0.8182	0	0	0.9495	0	0	0	0	0	0	0.7273	0	0	0	0.6465	0.8586	0.7576	0.6263	0.8384	0.5556	0.6364	0.5354	0.8788	0	0.3443	0.6721	0.7869	0.5758	0.5714	0.1429	0.5135	0.6465	0.7397	0.7529	0.7895	0.5269	0.5057	92
DEPDC4	Candidate gene	0.9495	0.7374	0.8485	0	0.6316	0.6087	0	0	0	0.9495	0	0	0	0	0	0	0	0	0	0	0.6465	0.8586	0.7576	0.6263	0.8384	0.5556	0.6364	0.5354	0.8788	0	0	0	0	0.5758	0.5714	0.6494	0.5135	0.6465	0.8904	0.8824	0.8421	0.5269	0.5057	93
DYRK3	Candidate gene	0.9596	0.3131	0.8485	0.7077	0.1368	0.6087	0	0	0	0.5253	0	0	0	0	0.6809	0	0	0	0.9524	0	0.6465	0.8586	0.1414	0.6263	0.2424	0.5556	0.6364	0.5354	0.2828	0.925	0.9016	1	0.9016	0.5758	0.5714	0.6494	0	0.6465	0.6027	0.5529	0.5053	0.5269	0.5057	94
FRMPD2	Candidate gene	0.9697	0.8384	0.8485	0	0.6316	0.6087	0.2576	0	0	0.4747	0	0	0	0	0	0	0.9242	0	0	0	0.6465	0.8586	0.7576	0.6263	0.8384	0.5556	0.6364	0.5354	0.8788	0	0	0	0	0.5758	0.5714	0.6494	0.5135	0.6465	0.6986	0.3529	1	0.5269	0.5057	95
KLK12	Candidate gene	0.9798	0.7778	0.2121	0.6	0.6316	0.6087	0.2576	0	0.7143	0.9495	0	0	0	0	0	0	0.8333	0	0	0	0.6465	0.8586	0.7576	0.6263	0.8384	0.5556	0.6364	0.5354	0.8788	0	0.5082	0.4918	0.9344	0.5758	0.5714	0.6494	0.5135	0.6465	0	0.2	0.9895	0	0.5057	96
ODF2	Candidate gene	0.9899	0.5051	0.8485	0.4769	0.6316	0	0.5303	0	0.381	0.7879	0.8421	0	0	0.68	0.6809	0.7188	0.9242	0	0.5	0	0.6465	0.2929	0.7576	0.6263	0.2828	0.5556	0.6364	0.5354	0.2626	1	1	0.9836	0.4262	0.5758	0.5714	0.6494	0.5135	0.2727	0.9589	0.7529	0.2316	0.5269	0.5057	97
KLK11	Candidate gene	1	0.7778	0.2121	0.4308	0.6316	0.6087	0.2576	0	0.7143	0.9495	0	0	0	0	0	0	0.803	0	0	0	0.2424	0.8586	0.7576	0.6263	0.8384	0.5556	0.6364	0.5354	0.8788	0.8	0.9508	0.377	1	0.5758	0.5714	0.6494	0.5135	0.6465	0.6712	0.2824	0.8947	0.5269	0.5057	98

## Sheet: WorkingCow_Metabolism
Gene name	Group	P-value	Annotation â€“ Gene Ontology	Annotation â€“ UniProt	Text-mining	Annotation â€“ InterPro	Annotation â€“ Pfam	Annotation â€“ SIMAP (localization)	Annotation â€“ DrugBank	Annotation â€“ Stitch	Annotation â€“ RGD ChEBI	Annotation â€“ Reactome	Annotation â€“ WikiPathways	Annotation â€“ RGD pathways	Annotation â€“ BioCarta	Annotation â€“ CPDB	Annotation â€“ hiPathDB	Annotation â€“ GAD	Annotation â€“ OMIM	Annotation â€“ RGD MP	Annotation â€“ RGD RDO	Interaction â€“ String	Interaction â€“ BioGrid	Interaction â€“ I2D	Interaction â€“ IntAct	Interaction â€“ iRefIndex	Interaction â€“ Mint	Interaction â€“ HPRD	Interaction â€“ MIPS	Interaction â€“ GeneRIF	Expression â€“ Su et al (2002)	Expression â€“ Su et al (2004)	Expression â€“ CMAP	Expression â€“ Lukk et al	Annotation â€“ PaGenBase	Annotation â€“ CGAP	Annotation â€“ GNF	Annotation â€“ eGenetics	Blast	Precalculated â€“ Ouzounis	Precalculated â€“ Prospectr	Precalculated â€“ HaploPred	Annotation â€“ Aura	Annotation â€“ mirZ	id
APOA2	Training gene	0.009	0.0092	0.027	0.0111	0.0594	0.04	0.1918	0	0.0238	0.0092	0.0286	0.1	0.0222	0.0435	0.0462	0.0233	0.0549	0.1714	0.0377	0.027	0.027	0.0541	0.045	0.045	0.0541	0.036	0.045	0.5586	0.0541	0	0.0536	0.0357	0.0536	0.0092	0.1048	0.0714	0	0.0991	0.0685	0.025	0.0667	0	0.506	0
APOE	Training gene	0.018	0.0183	0.009	0.0222	0.0099	0.01	0.4521	0.1818	0.0714	0.0183	0.0857	0.0333	0.0667	0.1304	0.0154	0.093	0.033	0.0286	0.0566	0.0811	0.027	0.0541	0.045	0.045	0.0541	0.036	0.045	0.018	0.0541	0.0286	0.0357	0.1071	0.0357	0.0275	0.1143	0.0429	0.5147	0.045	0.1644	0.825	0.3905	0.5208	0.506	1
INSR	Training gene	0.027	0.0642	0.0811	0.0667	0.0891	0.06	0.1918	0.0455	0.1905	0.0917	0.2857	0.1333	1	0.1739	0.1231	0.1163	0.044	0.0857	0.1509	0.2162	0.0811	0.0541	0.045	0.045	0.0541	0.036	0.045	0.018	0.0541	0.1429	0.3036	0.375	0.0714	0.1835	0.1524	0.2714	0.5147	0.045	0.0274	0.1125	0.0095	0.0104	0.506	2
PPARA	Training gene	0.036	0.0367	0.3604	0.0556	0.0693	0.11	0	0.0909	0.0952	0.0459	0.1143	0.2	0.5111	0.2174	0.0923	0.0698	0.022	0.2857	0.0189	0.0541	0.009	0.0541	0.045	0.045	0.0541	0.036	0.045	0.5586	0.0541	0.0857	0.1071	0.25	0.125	0.5963	0.2476	0.2143	0.0147	0.045	0	0.0625	0.3333	0.0208	0.506	3
APOA5	Training gene	0.045	0.0275	0.018	0	0.0099	0.01	0.4521	0	0.0476	0.1193	0.0571	0.0667	0.0222	0.0435	0.0308	0.0465	0.011	0.1429	0.0755	0.1081	0.009	0.0541	0.7027	0.045	0.0541	0.5495	0.5856	0.018	0.0541	0	0	0	0	0.0367	0.1524	0.0143	0.5147	0.045	0.5616	0.3	0.4	0	0.506	4
TF	Training gene	0.0541	0.2202	0.0901	0.0889	0.0495	0.08	0.1918	0.1364	0.2619	0.0642	0.6857	0.1667	0.9556	0.3043	0.1077	0.2558	0.0879	0.3143	0.2264	0.1892	0.0541	0.0541	0.045	0.045	0.0541	0.036	0.045	0.5586	0.0541	0.0571	0.0179	0.0179	0.0179	0.0183	0.1333	0.0286	0.5147	0.045	0.1918	0.1125	0.0762	0.5208	0.506	5
BDNF	Training gene	0.0631	0.0734	0.036	0.0444	0.0297	0.07	0.1918	0	0.1429	0.0826	0	0.2333	0.8667	0.3478	0.1692	0.1395	0.0769	0.0571	0.1698	0.2432	0.0901	0.0541	0.045	0.045	0.0541	0.036	0.045	0.5586	0.0541	0.1143	0.2321	0.1964	0.1429	0.1743	0.6571	0.2143	0.5147	0.045	0.0411	0.475	0.0381	0.5208	0.506	6
ZFHX3	Training gene	0.0721	0.1651	0.4144	0.0333	0.198	0.09	0.6712	0	0.3333	0.1468	0	0	0	0.2609	0.2	0.1628	0.1429	0.2571	0.3774	0.6486	0.6306	0.0541	0.045	0.045	0.0541	0.036	0.045	0.5586	0.0541	0	0	0	0	0.0826	0.181	0.0857	0.5147	0.045	0.3836	0.0625	0.0571	0.0313	0.506	7
NLRP3	Training gene	0.0811	0.0826	0.0721	0	0.0792	0.05	0.0137	0	0.1667	0.211	0.2571	0.3	0.9111	0	0.2308	0.2791	0.1209	0.1143	0.1132	0.4054	0.6306	0.0541	0.045	0.045	0.0541	0.5495	0.045	0.5586	0.0541	0.2	0.4643	0.0893	0.0893	0.1101	0.6571	0.6429	0.5147	0.045	0.2603	0.5125	0.2952	0.5208	0.506	8
GHRL	Training gene	0.0901	0.0459	0.0631	0.1	0.0396	0.03	0.1918	0	0.2857	0.0275	0.2286	0	0.5333	0	0.1846	0.186	0.0659	0.2286	0.5094	0.1351	0.0991	0.0541	0.045	0.5856	0.0541	0.5495	0.045	0.5586	0.0541	0	0	0	0	0.5963	0.6571	0	0.5147	0.0901	0.0822	0.4625	0.9333	0.5208	0.506	9
PLAGL1	Training gene	0.0991	0.1927	0.5135	0.0778	0.1584	0.13	0	0	0	0.0734	0	0	0	0	0	0	0.1648	0.2	0.4528	0	0.6306	0.0541	0.045	0.5856	0.0541	0.036	0.045	0.5586	0.0541	0.1714	0.25	0.125	0.1071	0.1193	0.6571	0.6429	0.5147	0.045	0.2329	0.5125	0.7048	0.5208	0.506	10
APP	Candidate gene	0.1081	0.1009	0.045	0.1778	0.604	0.6	0.4521	0.5909	0.2143	0.055	0.3714	0.2667	0.8667	0.3913	0.2462	0.2326	0.1758	0.6571	0.0943	0.3784	0.045	0.7387	0.2252	0.1171	0.3243	0.0991	0.1441	0.036	0.7568	0.8571	0.625	0.625	0.2321	0.1468	0.6571	0.6429	0.5147	0.6126	0.0137	0.375	0.019	0.5208	0.506	11
DRD2	Candidate gene	0.1171	0.055	0.1532	0.1111	0.604	0.6	0.8904	0.5909	0.7619	0.1376	0.4857	0.6667	0.6222	0.7391	0.6308	0.6512	0.0989	0.6571	0.1321	0.1622	0.0721	0.5856	0.2432	0.5856	0.2973	0.5495	0.1532	0.5586	0.4505	0.2286	0.1607	0.3571	0.625	0.5963	0.6571	0.6429	0.5147	0.6126	0.137	0.2	0.5905	0.5208	0.506	12
COL4A1	Candidate gene	0.1261	0.3578	0.0541	0.4222	0.604	0.6	0.1918	0	0.7619	0.0367	0.4857	0.6667	0.5778	0.4348	0.1538	0.6512	0.1538	0.6571	0.2075	0.2703	0.2252	0.5225	0.2793	0.5856	0.4234	0.5495	0.1622	0.5586	0.5405	0.7714	0.9286	0.6429	0.2143	0.1468	0.1714	0.1857	0	0.6126	0	0.0125	0.0381	0.5208	0.506	13
INVS	Candidate gene	0.1351	0.4587	0.3874	0.7667	0.604	0.6	0.4521	0	0	0.6239	0	0	0	0	0	0	0.4286	0.6571	0.3019	0.5676	0.6306	0.4775	0.1622	0.5856	0.2252	0.5495	0.5856	0.5586	0.2973	0.6286	0.2679	0.6607	0.6071	0.5963	0.6571	0.6429	0.5147	0.6126	0.0548	0.2	0.2095	0.5208	0.506	14
PARD3	Candidate gene	0.1441	0.1468	0.3153	0.3444	0.604	0.6	0.7671	0	0	0.1835	0.4857	0	0.4222	0.7391	0.6308	0.6512	0.3736	0	0.3208	0	0.1892	0.6396	0.2523	0.1261	0.3694	0.5495	0.1351	0.5586	0.5045	0.6	0.1964	0.7321	0.375	0.5963	0.6571	0.2143	0.5147	0.1441	0.2192	0.6875	0.1619	0.5208	0.506	15
ITCH	Candidate gene	0.1532	0.1284	0.2613	0.5111	0.604	0.6	0.3836	0	0.7619	0.6239	0.6286	0.6667	0.4222	0.7391	0.1385	0.6512	0.5714	0.6571	0.5283	0.9459	0.6306	0.6036	0.2883	0.5856	0.3874	0.5495	0.1622	0.5586	0.5225	0.4	0.375	0.5714	0.4107	0.0642	0.6571	0.6429	0.5147	0.6126	0.6301	0.0625	0.0857	0.5208	0.506	16
SLC1A2	Candidate gene	0.1622	0.1193	0.4685	0.3333	0.604	0.6	0.8904	0.5909	0.3095	0.2202	0.8571	0	0.8667	0	0.6308	0.6512	0.2527	0	0.2453	0.5946	0.1171	0.2162	0.1441	0.0901	0.1532	0.5495	0.5856	0.5586	0.2883	0.6857	0.5893	0.5	0.1786	0.5963	0.6571	0.6429	0.5147	0.6126	0.1096	0.0625	0.1429	0.5208	0.506	17
FGF12	Candidate gene	0.1712	0.1743	0.3153	0.5222	0.604	0.6	0.5479	0	0.7619	0.7248	0	0.6667	0.5778	0	0.6308	0.6512	0.4176	0	0.717	0	0.6306	0.4234	0.7027	0.5856	0.8198	0.5495	0.5856	0.5586	0.4234	0.4857	0.4464	0.3929	0.6429	0.5963	0.6571	0.6429	0.5147	0.6126	0.3699	0.6375	0.0286	0.5208	0.506	18
ZW10	Candidate gene	0.1802	0.3761	0.5225	0.8	0.604	0.6	0.6712	0	0	0.5138	0.8571	0	0	0	0.6308	0.6512	0.4945	0	0	0	0.6306	0.4685	0.3694	0.1622	0.4595	0.5495	0.5856	0.5586	0.4775	0.3429	0.1786	0.5179	0.5	0.0642	0.6571	0.6429	0.5147	0.6126	0.2466	0.425	0.2	0.5208	0.506	19
APLP2	Candidate gene	0.1892	0.2661	0.4324	0.5	0.604	0.6	0.4521	0	0.7619	0.2569	0	0	0	0	0	0	0.9121	0	0.3396	0.6216	0.1351	0.4144	0.2342	0.1441	0.3333	0.5495	0.1261	0.5586	0.4414	0.2571	0.7679	0.3393	0.8214	0.1009	0.2476	0.6429	0.5147	0.6126	0.4384	0.1125	0.4286	0.5208	0.506	20
OPCML	Candidate gene	0.1982	0.4862	0.2072	0.2	0.604	0.6	0.1918	0	0	0.7706	0	0	0	0	0	0	0.3077	0.6571	0	0	0.1982	0.8739	0.3604	0.5856	0.4324	0.5495	0.0991	0.5586	0.3243	0.8	0.4821	0.2857	0.25	0.1468	0.6571	0	0.5147	0.6126	0.5205	0.275	0.1333	0.5208	0.506	21
NFRKB	Candidate gene	0.2072	0.422	0.3153	0.1222	0.604	0.6	0.6712	0	0	0.8257	0	0	0	0	0	0	0.2747	0	0	0	0.6306	0.4595	0.1532	0.1441	0.3604	0.5495	0.5856	0.5586	0.5135	0.5143	0.2143	0.7143	0.3929	0.5963	0.6571	0.6429	0.5147	0.6126	0	0.75	0.5524	0.5208	0.506	22
PEX1	Candidate gene	0.2162	0.4404	0.4595	0.5556	0.604	0.6	0.1918	0	0.7619	0.7156	0	0	0	0	0.6308	0	0.4725	0.6571	0	0.3243	0.6306	0.2162	0.2613	0.5856	0.1982	0.5495	0.5856	0.5586	0.2973	0.3143	0.6429	0.4821	0.8393	0.5963	0.1429	0.6429	0.5147	0.1892	0.1233	0.925	0.1714	0.5208	0.506	23
ABCA13	Candidate gene	0.2252	0.7248	0.6036	0	0.604	0.6	0.4521	0	0	0.5321	0	0	0	0	0.6308	0	0.4066	0	0	0	0.0631	0.1081	0.7027	0.5856	0.1081	0.5495	0.5856	0.5586	0.1081	0	0	0	0	0.5963	0.6571	0.0571	0	0.6126	0.6849	0.35	0.8762	0.5208	0.506	24
USP28	Candidate gene	0.2342	0.7339	0.3153	0.7333	0.604	0.6	0.6712	0	0	0.7523	0	0	0	0	0	0	0	0	0	0	0.6306	0.5766	0.3423	0.5856	0.3333	0.5495	0.5856	0.5586	0.5315	0	0	0	0	0.5963	0.6571	0.6429	0.5147	0.6126	0.5479	0.425	0.1524	0.5208	0.506	25
PPP1R9A	Candidate gene	0.2432	0.4679	0.3153	0.4667	0.604	0.6	0.7671	0	0	0.4954	0	0	0	0	0	0	0.3297	0	0.717	0	0.1441	0.3243	0.3063	0.5856	0.3784	0.5495	0.5856	0.5586	0.3964	0	0.3571	0.9643	0.1607	0.5963	0.6571	0.6429	0.5147	0.6126	0.3562	0.6875	0.2571	0.5208	0.506	26
PIP4K2A	Candidate gene	0.2523	0.5046	0.2613	0.1556	0.604	0.6	0	0	0.4762	0.7982	0.1714	0.6667	0.4222	0.7391	0.0769	0.6512	0.3407	0	0	0	0.6306	0.3514	0.7027	0.5856	0.3514	0.5495	0.5856	0.5586	0.4685	0.5714	0.9107	0.6071	0.2679	0.5963	0.6571	0.6429	0.5147	0.6126	0.7671	0.3625	0.7714	0.5208	0.506	27
DLC1	Candidate gene	0.2613	0.0917	0.3153	0.3556	0.604	0.6	0	0	0.7619	0.1009	0.4857	0	0	0.7391	0.6308	0.6512	0.2198	0.6571	0.3962	0.973	0.6306	0.5946	0.1982	0.5856	0.2793	0.0811	0.5856	0.5586	0.3423	0.9143	0.0714	0.7857	0.3214	0.5963	0.1143	0.6429	0.5147	0.1712	0.6986	0.0625	0.5619	0.5208	0.506	28
ABCG2	Candidate gene	0.2703	0.2569	0.6036	0.1333	0.604	0.6	0.8904	0.5909	0.3571	0.1284	0.6	0.6667	0.9333	0.7391	0.6308	0.2093	0.1099	0.6571	0.4717	0.2973	0.1712	0.1261	0.2973	0.5856	0.2432	0.5495	0.5856	0.5586	0.1171	0.5429	0.5714	0.9821	0.5536	0.0826	0.6571	0.6429	0.5147	0.6126	0.3973	0.2	0.9714	0.5208	0.506	29
PRPF31	Candidate gene	0.2793	0.6606	0.1532	0.6556	0.604	0.6	0.6712	0	0.7619	0.8807	0	0	0.2222	0	0.6308	0	0.7253	0.6571	0.8491	0.7838	0.2613	0.6847	0.2613	0.1081	0.5856	0.5495	0.5856	0.1171	0.6757	0.4286	0.3929	0.4107	0.3571	0.5963	0.2476	0.6429	0.5147	0.6126	0.2055	0.65	0.4952	0.5208	0.506	30
PIGU	Candidate gene	0.2883	0.7064	0.4865	0	0.604	0.6	0.1918	0	0	0.6147	0.8571	0	0.2222	0.7391	0.6308	0.6512	0.8022	0	0	0	0.6306	0.4234	0.3874	0.5856	0.2793	0.5495	0.5856	0.5586	0.4505	0	0	0	0	0.5963	0.6571	0.6429	0.5147	0.6126	0.7397	0.5875	0.6095	0.5208	0.506	31
BCKDHB	Candidate gene	0.2973	0.1835	0.0991	0.4778	0.604	0.6	0.1918	0	0.4286	0.5413	0.3143	0.6667	0.2222	0	0.6308	0.6512	0.4835	0.6571	0	0.3514	0.6306	0.8739	0.7027	0.5856	0.8198	0.5495	0.5856	0.5586	0.8829	0.8286	0.6607	0.7679	0.8571	0.0642	0.6571	0.1286	0.5147	0.1261	0.0959	0.15	0.4381	0.5208	0.506	32
ST14	Candidate gene	0.3063	0.844	0.1532	0.5889	0.604	0.6	0.8904	0.5909	0.7619	0.2294	0	0	0	0	0	0	0.8242	0.6571	0.434	0.4324	0.6306	0.3874	0.7027	0.5856	0.4414	0.5495	0.5856	0.5586	0.4865	0.2857	0.6786	0.6964	0.5714	0.5963	0.6571	0.6429	0.5147	0.6126	0.411	0.5125	0.1905	0.5208	0.506	33
TTYH1	Candidate gene	0.3153	0.5596	0.6036	0.8222	0.604	0.6	0.5479	0	0	0.3761	0.8571	0	0	0	0.6308	0	0	0	0.6226	0	0.6306	0.2162	0.0991	0.5856	0.1532	0.5495	0.5856	0.5586	0.1982	0	0.8571	0.2321	0.1964	0.5963	0.6571	0.6429	0.5147	0.6126	0.4247	0.8875	0.2762	0.5208	0.506	34
GRID2	Candidate gene	0.3243	0.2018	0.4955	0.7222	0.604	0.6	0.1918	0.5909	0.7619	0.5505	0	0	0.4222	0	0.6308	0.6512	0.3846	0	0.3585	0	0.2072	0.8739	0.3333	0.5856	0.8198	0.5495	0.5856	0.5586	0.8829	0	0.5357	0.1429	0.5893	0.5963	0.6571	0.6429	0.5147	0.6126	0.3425	0.375	0.3429	0	0	35
ATG5	Candidate gene	0.3333	0.2477	0.3153	0.3889	0.604	0.6	0	0	0.7619	0.1927	0.8571	0.6667	0.9778	0	0.6308	0.6512	0.3516	0	0.283	0	0.1261	0.4414	0.3784	0.1712	0.6306	0.5495	0.5856	0.5586	0.4865	0.4571	0.0893	0.3036	0.4464	0.5963	0.6571	0.6429	0.5147	0.6126	0.8082	0.75	0.3143	0.5208	0.506	36
CACNA2D1	Candidate gene	0.3604	0.4128	0.4955	0.4556	0.604	0.6	0.1918	0.5909	0.2381	0.2018	0	0.6667	0.5778	0	0.6308	0.6512	0.2088	0	0.7547	0	0.6306	0.8739	0.1261	0.5856	0.8198	0.5495	0.5856	0.5586	0.8829	0.8857	0.1429	0.6786	0.7321	0.5963	0.6571	0.6429	0.5147	0.2162	0.5753	0.1125	0.3048	0.5208	0.506	39
DLGAP4	Candidate gene	0.3694	0.7615	0.8378	0.7778	0.604	0.6	0.1918	0	0	0.1101	0	0	0	0	0	0	0.9121	0	0	0	0.6306	0.4414	0.2162	0.1441	0.2613	0.0901	0.5856	0.5586	0.6757	0	0	0	0	0.1468	0.2476	0.2143	0.5147	0.1982	0.3288	0.2	0.7333	0.5208	0.506	40
PLXDC2	Candidate gene	0.3784	0.7615	0.4324	0.1444	0.604	0.6	0.1918	0	0.7619	0.1651	0	0	0	0	0	0	0.2857	0	0	0	0.2523	0.3243	0.7027	0.5856	0.1982	0.5495	0.5856	0.5586	0.3243	0	0	0	0	0.5963	0.6571	0.6429	0	0.6126	0.9863	0.6875	0.2286	0.5208	0.506	41
TRPC3	Candidate gene	0.3874	0.1101	0.6036	0.5333	0.604	0.6	0.5479	0	0.7619	0.5046	0.4857	0	0	0.7391	0.2154	0.6512	0.8132	0	0.2642	0.973	0.1081	0.8739	0.1802	0.5856	0.2613	0.5495	0.1171	0.5586	0.4144	0.3714	0.125	0.1786	0.8036	0.5963	0.6571	0.6429	0.5147	0.6126	0.726	0.725	0.3238	0.5208	0.506	42
EPHA6	Candidate gene	0.3964	0.8532	0.4324	0.4889	0.2079	0.19	0.1918	0	0.4762	0.6697	0	0	0.4222	0	0.6308	0.6512	0.1868	0	0.717	0	0.6306	0.2162	0.7027	0.5856	0.8198	0.5495	0.5856	0.5586	0.3694	0	0	0	0	0.5963	0.6571	0.6429	0	0.1081	0.6027	0.9375	0.3429	0.5208	0.506	43
THADA	Candidate gene	0.4054	0	0.8378	0.1667	0.604	0.6	0.6712	0	0	0.6697	0	0	0	0	0	0	0.1319	0	0	0	0.6306	0.6126	0.7027	0.5856	0.1532	0.5495	0.5856	0.5586	0.5495	0	0.75	0.4643	0.6607	0.5963	0.6571	0.1286	0.5147	0.1351	0.5342	0.8375	0.8952	0.5208	0.506	44
NGEF	Candidate gene	0.4144	0.2294	0.8378	0.4444	0.604	0.6	0.3836	0	0	0.156	0.4857	0	0.4222	0.7391	0.6308	0.6512	0.4505	0	0.9434	0	0.2162	0.8739	0.1982	0.5856	0.4054	0.5495	0.5856	0.5586	0.8829	0	0	0	0	0.0367	0.6571	0	0.5147	0.6126	0.3151	0.2	0.3714	0	0.506	45
PRPF31	Candidate gene	0.4234	0.6606	0.1532	0.6556	0.604	0.6	0	0	0	0.8807	0	0	0.2222	0	0.6308	0	0.7253	0.6571	0.8491	0.7838	0.6306	0.6847	0.7027	0.5856	0.5856	0.5495	0.5856	0.0721	0.6757	0	0	0	0	0.5963	0.2476	0	0	0.6126	0	0	0.4952	0.5208	0.506	46
STX12	Candidate gene	0.4324	0.1376	0.4054	0.7889	0.604	0.6	0.6712	0	0	0.5963	0.8571	0	0	0	0.6308	0	0	0	0	0	0.6306	0.3874	0.3243	0.5856	0.4144	0.5495	0.5856	0.5586	0.4234	0.7143	0.8929	0.3214	0.4286	0.5963	0.6571	0.6429	0	0.6126	0.8904	0.75	0.1238	0.5208	0.506	47
PRPF31	Candidate gene	0.4414	0.6606	0.1532	0.6556	0.604	0.6	0	0	0	0.8807	0	0	0.2222	0	0.6308	0	0.7253	0.6571	0.8491	0.7838	0.6306	0.6847	0.7027	0.5856	0.5856	0.5495	0.5856	0.0721	0.6757	0	0	0	0	0.5963	0.2476	0	0	0.6126	0	0	0.4952	0.5208	0	48
DYNC1I2	Candidate gene	0.5045	0.6055	0.5225	1	0.604	0.6	0.6712	0	0.4762	0.5229	0.8571	0	0.4222	0.7391	0.6308	0.6512	0.9121	0	0.5849	0	0.6306	0.7297	0.1982	0.5856	0.3964	0.5495	0.5856	0.5586	0.7297	0	0	0	0	0.1468	0.6571	0	0.5147	0.6126	0.5068	0.55	0.5429	0.5208	0.506	55
TSPAN9	Candidate gene	0.5135	0.9358	0.8378	0.1889	0.604	0.6	0.1918	0	0	0.8807	0	0	0	0	0	0	0.2308	0	0	0	0.6306	0.1261	0.7027	0.5856	0.1532	0.5495	0.5856	0.5586	0.1171	0.6571	0.6071	0.8571	0.4643	0.5963	0.6571	0.6429	0.5147	0.6126	0.6712	0.25	0.7143	0.5208	0.506	56
NXN	Candidate gene	0.5225	0.4495	0.8378	0.9889	0.604	0.6	0	0	0.7619	0.2385	0	0.6667	0	0	0.6308	0	0.9121	0	0.566	0	0.6306	0.3063	0.3153	0.5856	0.2973	0.5495	0.5856	0.5586	0.3243	0	0.5179	0.875	0.2857	0.5963	0.6571	0.6429	0.5147	0.6126	0.6164	0.425	0.381	0.5208	0.506	57
INF2	Candidate gene	0.5315	0.7615	0.3694	0.7556	0.604	0.6	0.6712	0	0	0.5688	0	0	0	0	0	0	0	0.6571	0	0.4865	0.6306	0.3514	0.7027	0.5856	0.2432	0.5495	0.5856	0.5586	0.3694	0	0.5	0.8929	0.9464	0.5963	0.6571	0.6429	0.5147	0.1802	0	0	0	0.5208	0.506	58
CERS4	Candidate gene	0.5405	0.5413	0.8378	0.3778	0.1881	0.16	0.5479	0	0.7619	0.7798	0.1714	0	0	0	0.6308	0.6512	0.6374	0	0	0	0.6306	0.8739	0.7027	0.5856	0.8198	0.5495	0.5856	0.5586	0.8829	0	0.6964	0.5893	0.3393	0.5963	0.6571	0.1286	0.5147	0.1532	0.8493	0.5125	0	0	0.506	59
CYP39A1	Candidate gene	0.5495	0.5872	0.8378	0.3222	0.604	0.6	0.1918	0	0.381	0.2477	0.1714	0.6667	0.0889	0.7391	0.6308	0.6512	0	0	0	0	0.1622	0.8739	0.7027	0.5856	0.8198	0.5495	0.5856	0.5586	0.8829	0	0.9464	0.4464	0.4821	0.5963	0.0952	0.6429	0.5147	0.6126	0.7534	0.3	0.419	0.5208	0.506	60
FABP7	Candidate gene	0.5586	0.367	0.3784	0.4	0.604	0.6	0	0.5909	0.7619	0.3945	0	0	0	0	0.0615	0	0.6593	0	0.5472	0	0.2432	0.8739	0.7027	0.5856	0.8198	0.5495	0.5856	0.5586	0.8829	0.9429	0.8393	0.0714	0.3036	0.5963	0.6571	0.6429	0.5147	0.6126	0.7123	0.6	0.1143	0.5208	0.506	61
ZMAT4	Candidate gene	0.5676	0.8073	0.8378	0.5667	0.1089	0.15	0	0	0	0.9725	0	0	0	0	0	0	0.2637	0	0	0	0.6306	0.2162	0.7027	0.5856	0.8198	0.5495	0.5856	0.5586	0.1982	0	0.7143	0.5536	0.75	0.5963	0.6571	0.6429	0.5147	0.1171	0.4521	0.6125	0.181	0.5208	0.506	62
METTL16	Candidate gene	0.5766	0.9358	0.3153	0.5444	0.604	0.6	0	0	0.7619	0.6055	0	0	0	0	0	0	0.4615	0	0	0	0.6306	0.3874	0.7027	0.5856	0.8198	0.5495	0.5856	0.5586	0.3964	0	0.7857	0.8393	0.5179	0.5963	0.6571	0.6429	0.5147	0.6126	0.3014	0.425	0	0	0.506	63
TFPT	Candidate gene	0.5856	0.3119	0.8378	0.9	0	0	0	0	0	0.3119	0	0	0	0	0	0	0.5714	0	0	0	0.6306	0.5225	0.7027	0.5856	0.5045	0.5495	0.5856	0.5586	0.5946	0	0	0	0	0.5963	0.6571	0	0	0.6126	0	0	0.6571	0.5208	0.506	64
HERC5	Candidate gene	0.5946	0.4312	0.8378	0.7111	0.604	0.6	0.1918	0	0	0.4862	0.8571	0	0	0	0.6308	0	0.7802	0	0	0	0.6306	0.6216	0.3514	0.5856	0.4414	0.5495	0.5856	0.5586	0.7387	0	0.8036	0.9107	0.6964	0.1927	0.6571	0.6429	0.5147	0.6126	0.8767	0.5625	0.4095	0.5208	0.506	65
UNC79	Candidate gene	0.6036	0.4037	0.8378	0.4333	0.604	0.6	0	0	0	0.9725	0.8571	0	0	0	0.6308	0	0.4945	0	0.4151	0	0.6306	0.3514	0.1261	0.0901	0.8198	0.5495	0.5856	0.5586	0.3694	0	0	0	0	0.5963	0.6571	0.6429	0.5147	0.6126	0.8219	0.2625	0	0	0.506	66
LENG9	Candidate gene	0.6757	0.8073	0.8378	0	0.604	0.6	0.1918	0	0	0.8807	0	0	0	0	0	0	0	0	0	0	0.6306	0.2162	0.7027	0.5856	0.1532	0.5495	0.5856	0.5586	0.1982	0	0	0	0	0.5963	0	0	0.5147	0.6126	0.4658	0.95	0.0952	0.5208	0.506	74
SLC25A27	Candidate gene	0.6847	0.156	0.6036	0.3667	0.604	0.6	0	0	0	0.2661	0	0.6667	0	0	0.6308	0	0.2418	0	0	0.9189	0.6306	0.8739	0.7027	0.5856	0.8198	0.5495	0.5856	0.5586	0.8829	0	0	0	0	0.5963	0.6571	0	0	0.6126	0.6438	0.3375	0.781	0.5208	0.506	75
LENG9	Candidate gene	0.6937	0.8073	0.8378	0	0	0	0	0	0	0.8807	0	0	0	0	0	0	0	0	0	0	0.6306	0.2162	0.7027	0.5856	0.1532	0.5495	0.5856	0.5586	0.1982	0	0	0	0	0.5963	0	0	0	0.6126	0	0	0.0952	0.5208	0.506	76
FANCC	Candidate gene	0.7027	0.3945	0.3874	0.3111	0.604	0.6	0	0	0.4048	0.6972	0.8571	0	0	0.7391	0.6308	0.6512	0.3187	0.6571	0.9811	0.5135	0.6306	0.6306	0.3964	0.5856	0.6396	0.5495	0.5856	0.5586	0.7477	0.7429	0.3214	0.8036	0.8929	0.5963	0.6571	0.1286	0.5147	0.6126	0.1781	0.8	0.9429	0.5208	0.506	77
NDUFA3	Candidate gene	0.7117	0.9358	0.6036	0.2556	0.604	0.6	0.8904	0.5909	0	0.4404	0	0.6667	0.7333	0	0.6308	0.6512	0.9121	0	0	0	0.6306	0.2162	0.7027	0.5856	0.8198	0.5495	0.5856	0.5586	0.1982	0	0	0	0	0.5963	0.0476	0	0	0.6126	0	0	0.8286	0.5208	0.506	78
AK8	Candidate gene	0.7207	0.4771	0.8378	0	0.604	0.6	0	0.5909	0.4762	0.5596	0	0	0	0	0	0	0.9121	0	0.6792	0	0.6306	0.8739	0.7027	0.5856	0.1532	0.5495	0.5856	0.5586	0.8829	0	0	0	0	0.5963	0.6571	0	0.5147	0.6126	0.6575	0.8	0	0	0.506	79
TFPT	Candidate gene	0.7928	0.3119	0.8378	0.9	0	0	0.6712	0	0	0.3119	0	0	0	0	0	0	0.5714	0	0	0	0.6306	0.5225	0.7027	0.5856	0.5045	0.5495	0.5856	0.5586	0.5946	0	0.875	0.5357	0.6786	0.5963	0.6571	0.6429	0	0.6126	0	0.9875	0.6571	0.5208	0.506	87
RAB38	Candidate gene	0.8018	0.2385	0.4685	0.8444	0.604	0.6	0	0	0	0.7064	0	0	0	0.7391	0.6308	0	0.7802	0	0.9623	0.4595	0.6306	0.1261	0.1171	0.5856	0.2162	0.5495	0.1081	0.5586	0.2793	0	0.8214	0.0536	1	0.5963	0.6571	0.2571	0.5147	0.6126	0.4932	0.9625	0.4476	0.5208	0.506	88
ANKFN1	Candidate gene	0.8108	0	0.8378	0	0.1188	0.17	0.4521	0	0	0.7615	0	0	0	0	0	0	0.9121	0	0	0	0.6306	0.8739	0.7027	0.5856	0.8198	0.5495	0.5856	0.5586	0.8829	0	0	0	0	0.5963	0.6571	0.6429	0.5147	0.6126	0.4795	0.425	0.2381	0.5208	0.506	89
LENG8	Candidate gene	0.8198	0.7615	0.8378	0	0.604	0.6	0	0	0	0.578	0	0	0	0	0	0	0	0	0	0	0.6306	0.8739	0.7027	0.5856	0.8198	0.5495	0.5856	0.5586	0.8829	0	0	0	0	0.5963	0.6571	0	0.5147	0.6126	0.589	0.8625	0.7333	0.5208	0.506	90
CD320	Candidate gene	0.8288	0.5963	0.2432	0.5778	0.604	0.6	0.1918	0	0.119	0.6514	0	0	0	0	0	0	0.9121	0.6571	1	0.5405	0.6306	0.3243	0.0991	0.5856	0.2342	0.5495	0.5856	0.5586	0.1982	0	0.9643	0.75	0.5357	0.5963	0.6571	0.6429	0.5147	0.6126	0.9315	0.9125	0.9905	0.5208	0.506	91
LENG8	Candidate gene	0.8378	0.7615	0.8378	0	0.604	0.6	0	0	0	0.578	0	0	0	0	0	0	0	0	0	0	0.6306	0.8739	0.7027	0.5856	0.8198	0.5495	0.5856	0.5586	0.8829	0	0	0	0	0.5963	0.6571	0	0	0.6126	0	0	0.7333	0.5208	0.506	92
ZBTB44	Candidate gene	0.8468	0.5138	0.8378	0	0.1584	0.13	0	0	0	0.1743	0	0	0	0	0	0	0	0	0	0	0.6306	0.8739	0.1712	0.5856	0.8198	0.5495	0.5856	0.5586	0.8829	0	0.4286	0.9286	0.7679	0.5963	0.6571	0.6429	0.5147	0.6126	0	0.75	0.9143	0.5208	0.506	93
VWC2	Candidate gene	0.8559	0.211	0.2252	0	0.604	0.6	0.1918	0	0	0.9725	0	0	0	0	0	0	0	0	0	0	0.6306	0.8739	0.7027	0.5856	0.8198	0.5495	0.5856	0.5586	0.8829	0	0	0	0	0.5963	0	0.6429	0.5147	0.6126	0	0.575	0.7524	0.5208	0.506	94
ZNF804B	Candidate gene	0.8649	0.8073	0.8378	0	0.1287	0.6	0.5479	0	0	0	0.6571	0	0	0	0	0	0.3626	0	0	0	0.6306	0.8739	0.7027	0.5856	0.8198	0.5495	0.5856	0.5586	0.8829	0	0	0	0	0.5963	0	0.6429	0	0.6126	0.274	0.875	0.8952	0	0	95
KIAA1324L	Candidate gene	0.8739	0.9358	0.4324	0	0.099	0	0.1918	0	0	0.7339	0	0	0	0	0	0	0.2967	0	0	0	0.6306	0.8739	0.7027	0.5856	0.8198	0.5495	0.5856	0.5586	0.8829	0	0	0	0	0.5963	0.6571	0	0.5147	0.6126	0.9178	0.325	0.2381	0.5208	0.506	96
NDUFA3	Candidate gene	0.8829	0.9358	0.6036	0.2556	0.604	0.6	0.8904	0.5909	0.7619	0.4404	0.3143	0.6667	0.7333	0	0.6308	0.6512	0.9121	0	0	0	0.6306	0.2162	0.7027	0.5856	0.8198	0.5495	0.5856	0.5586	0.1982	0	0.7321	0.8214	0.7143	0.5963	0.0476	0.1286	0.5147	0.1622	0.8356	0.975	0.8286	0.5208	0	97
TMPRSS5	Candidate gene	0.8919	0.6055	0.8378	0.9667	0.604	0.6	0.8904	0	0	0.6697	0	0	0	0	0	0	0.6593	0	0	0	0.6306	0.8739	0.7027	0.5856	0.8198	0.5495	0.5856	0.5586	0.8829	0	0.4107	0.2679	0.7857	0.5963	0.6571	0.6429	0.5147	0.6126	0.1507	0.2	0.8857	0	0.506	98
ANKK1	Candidate gene	0.9009	0.8073	0.8378	0	0.1386	0.18	0	0	0.7619	0.6697	0	0	0	0	0	0	0.1978	0.6571	0	0	0.1802	0.8739	0.7027	0.5856	0.8198	0.5495	0.5856	0.5586	0.8829	0	0	0	0	0.5963	0.6571	0.6429	0	0.6126	0.2877	0.5125	0.981	0.5208	0.506	99
COL28A1	Candidate gene	0.9099	0.7156	0.2252	0	0.604	0.6	0.1918	0	0	0.9725	0.8571	0	0	0	0.6308	0	0.3846	0	0	0	0.6306	0.8739	0.7027	0.5856	0.8198	0.5495	0.5856	0.5586	0.8829	0	0	0	0	0.5963	0.6571	0	0	0.6126	0	0	0.581	0	0.506	100
ZIC4	Candidate gene	0.9189	0.8073	0.8378	0.9556	0.1584	0.13	0.1918	0	0	0.8073	0	0	0	0	0	0	0	0	0.4906	0	0.2252	0.8739	0.7027	0.5856	0.8198	0.5495	0.5856	0.5586	0.8829	0	0.3393	0.2143	0.9643	0.5963	0.6571	0.6429	0	0.6126	0.9041	0.2	0.5714	0.5208	0.506	101
MANBAL	Candidate gene	0.9279	0.9358	0.8378	0	0.604	0.6	0.8904	0	0	0.7339	0	0	0	0	0	0	0	0	0	0	0.6306	0.3874	0.7027	0.5856	0.8198	0.5495	0.5856	0.5586	0.3694	0	0	0	0	0.5963	0.2476	0	0	0.6126	1	0.6125	0.6	0.5208	0.506	102
PRDM10	Candidate gene	0.9369	0.5138	0.3153	0.4111	0.1584	0.1	0.7671	0	0	0.6422	0	0	0	0	0	0	0.5165	0	0	0	0.6306	0.8739	0.7027	0.5856	0.8198	0.5495	0.5856	0.5586	0.8829	0	0.2857	1	0.9821	0.5963	0.6571	0.6429	0.5147	0.6126	0.9726	0.6875	0.3619	0.5208	0.506	103
HERC6	Candidate gene	0.9459	0.9358	0.8378	0.9778	0.604	0.6	0.5479	0	0	0.3578	0	0	0	0	0	0	0	0	0	0	0.6306	0.3514	0.7027	0.5856	0.3153	0.5495	0.5856	0.5586	0.3694	0	0.5536	0.9464	0.9107	0.5963	0.6571	0.6429	0.5147	0.6126	0.9589	0.9	0.9238	0.5208	0.506	104
PKD1L1	Candidate gene	0.955	0.3853	0.8378	0	0.604	0.6	0.8904	0	0	0.9725	0	0	0	0	0	0	0.6484	0	0.1887	0	0.6306	0.8739	0.7027	0.5856	0.8198	0.5495	0.5856	0.5586	0.8829	0	0	0	0	0.5963	0.6571	0.1286	0.5147	0.6126	0.9452	0.6625	0.9619	0.5208	0.506	105
AASDH	Candidate gene	0.964	0.8624	0.8378	0	0.604	0.6	0	0	0.7619	0.9725	0	0	0	0	0	0	0	0	0	0	0.6306	0.8739	0.7027	0.5856	0.8198	0.5495	0.5856	0.5586	0.8829	0	0	0	0	0.5963	0.6571	0.6429	0.5147	0.6126	0.7945	0.8	0.9429	0.5208	0.506	106
OR4P4	Candidate gene	0.973	0.578	0.8378	0	0.604	0.6	0.5479	0	0	0	0.4857	0	0	0	0	0.6512	0	0	0	0	0.6306	0.8739	0.7027	0.5856	0.8198	0.5495	0.5856	0.5586	0.8829	0	0	0	0	0	0	0	0	0.6126	0.863	1	0.7619	0	0	107
ZPBP	Candidate gene	0.982	0.5321	0.2252	0.7444	0.604	0.6	0.1918	0	0	0.8165	0	0	0	0	0	0	0	0	0.6604	0	0.6306	0.8739	0.7027	0.5856	0.8198	0.5495	0.5856	0.5586	0.8829	1	0.9821	0.1607	0.9286	0.5963	0.6571	0.6429	0.5147	0.6126	0.7808	0.3	0.219	0	0.506	108
CLDN25	Candidate gene	0.991	0.9358	0.8378	0	0.604	0.6	0.1918	0	0	0.9725	0	0	0	0	0.6308	0	0	0	0	0	0.6306	0.8739	0.7027	0.5856	0.8198	0.5495	0.5856	0.5586	0.8829	0	0	0	0	0	0	0	0	0.2072	0	0	0	0	0	109
PRM1	Candidate gene	1	0.4954	0.2613	0.6	0.604	0.6	0.5479	0	0	0.789	0	0	0	0	0	0	0.4396	0	0	0	0.1532	0.8739	0.7027	0.5856	0.8198	0.5495	0.5856	0.5586	0.8829	0.9714	1	0.4286	0.875	0.5963	0.6571	0.6429	0.5147	0.6126	0	0.85	1	0	0.506	110
