# Supplementary material for: Genome-Wide Signatures of Selection Reveal Genes Associated With Performance in American Quarter Horse Subpopulations
Source: Front Genet. 2018 Jul 19;9:249. doi: 10.3389/fgene.2018.00249 (PMC6060370; doi:10.3389/fgene.2018.00249)
Supplement: Supplementary Table 10 — FunRich3.0 functional enrichment and pathway analysis results for the halter QH subpopulation. [file Table_10.XLSX]

## Sheet: Dataset(Halter)
Name of dataset: Halter
No. of identified items: 82 of 82
No. of unidentified items: 0
ID type: GeneSymbol
Number of mapped gene: 82
Is dataset quantitative :NO
Mapped items:
Dataset item (Gene symbol )		Entrez ID	Gene symbol	Description	Alternate names	Chromosome	Map location
EMX2		2018	EMX2	empty spiracles homeobox 2	-	10	10q26.1
PML		5371	PML	promyelocytic leukemia	MYL|PP8675|RNF71|TRIM19	15	15q22
STOML1		9399	STOML1	stomatin (EPB72)-like 1	SLP-1|STORP|hUNC-24	15	15q24.1
LOXL1		4016	LOXL1	lysyl oxidase-like 1	LOL|LOXL	15	15q22
TBC1D21		161514	TBC1D21	TBC1 domain family, member 21	MgcRabGAP	15	15q24.1
RCC1		1104	RCC1	regulator of chromosome condensation 1	CHC1|RCC1-I|SNHG3-RCC1	1	1p36.1
PHACTR4		65979	PHACTR4	phosphatase and actin regulator 4	PPP1R124	1	1p35.3
MED18		54797	MED18	mediator complex subunit 18	p28b	1	1p35.3
SESN2		83667	SESN2	sestrin 2	HI95|SES2|SEST2	1	1p35.3
ATPIF1		93974	ATPIF1	ATPase inhibitory factor 1	ATPI|ATPIP|IP	1	1p35.3
DNAJC8		22826	DNAJC8	DnaJ (Hsp40) homolog, subfamily C, member 8	HSPC331|SPF31	1	1p35.3
PTAFR		5724	PTAFR	platelet-activating factor receptor	PAFR	1	1p35-p34.3
EYA3		2140	EYA3	EYA transcriptional coactivator and phosphatase 3	-	1	1p36
RPA2		6118	RPA2	replication protein A2, 32kDa	REPA2|RP-A p32|RP-A p34|RPA32	1	1p35
THEMIS2		9473	THEMIS2	thymocyte selection associated family member 2	C1orf38|ICB-1	1	1p35.3
STX12		23673	STX12	syntaxin 12	STX13|STX14	1	1p35.3
FAM76A		199870	FAM76A	family with sequence similarity 76, member A	-	1	1p35.3
IFI6		2537	IFI6	interferon, alpha-inducible protein 6	6-16|FAM14C|G1P3|IFI-6-16|IFI616	1	1p35
FGR		2268	FGR	FGR proto-oncogene, Src family tyrosine kinase	SRC2|c-fgr|c-src2|p55-Fgr|p55c-fgr|p58-Fgr|p58c-fgr	1	1p36.2-p36.1
WASF2		10163	WASF2	WAS protein family, member 2	IMD2|SCAR2|WASF4|WAVE2|dJ393P12.2	1	1p36.11
GPR3		2827	GPR3	G protein-coupled receptor 3	ACCA	1	1p36.1-p35
CD164L2		388611	CD164L2	CD164 sialomucin-like 2	EAPG6122|UNQ6122	1	1p36.11
FCN3		8547	FCN3	ficolin (collagen/fibrinogen domain containing) 3	FCNH|HAKA1	1	1p36.11
MAP3K6		9064	MAP3K6	mitogen-activated protein kinase kinase kinase 6	ASK2|MAPKKK6|MEKK6	1	1p36.11
SYTL1		84958	SYTL1	synaptotagmin-like 1	JFC1|SLP1	1	1p36.11
TMEM222		84065	TMEM222	transmembrane protein 222	C1orf160	1	1p36.11
WDTC1		23038	WDTC1	WD and tetratricopeptide repeats 1	ADP|DCAF9	1	1p36.11
SLC9A1		6548	SLC9A1	solute carrier family 9, subfamily A (NHE1, cation proton antiporter 1), member 1	APNH|LIKNS|NHE-1|NHE1|PPP1R143	1	1p36.1-p35
FAM46B		115572	FAM46B	family with sequence similarity 46, member B	-	1	1p36.11
KDF1		126695	KDF1	keratinocyte differentiation factor 1	C1orf172	1	1p36.11
NUDC		10726	NUDC	nudC nuclear distribution protein	HNUDC|MNUDC|NPD011	1	1p36.11
NR0B2		8431	NR0B2	nuclear receptor subfamily 0, group B, member 2	SHP|SHP1	1	1p36.1
GPATCH3		63906	GPATCH3	G patch domain containing 3	GPATC3	1	1p35.3-p35.1
GPN2		54707	GPN2	GPN-loop GTPase 2	ATPBD1B	1	1p36.11
NIPAL3		57185	NIPAL3	NIPA-like domain containing 3	DJ462O23.2|NPAL3	1	1p36.12-p35.1
STPG1		90529	STPG1	sperm-tail PG-rich repeat containing 1	C1orf201|MAPO2	1	1p36.11
GRHL3		57822	GRHL3	grainyhead-like 3 (Drosophila)	SOM|TFCP2L4|VWS2	1	1p36.11
PLEKHM2		23207	PLEKHM2	pleckstrin homology domain containing, family M (with RUN domain) member 2	SKIP	1	1p36.21
KAZN		23254	KAZN	kazrin, periplakin interacting protein	KAZ	1	1p36.21
KIFC3		3801	KIFC3	kinesin family member C3	-	16	16q13-q21
GINS3		64785	GINS3	GINS complex subunit 3 (Psf3 homolog)	PSF3	16	16q21
CHIC2		26511	CHIC2	cysteine-rich hydrophobic domain 2	BTL	4	4q11
STIM2		57620	STIM2	stromal interaction molecule 2	-	4	4p15.2
CACNA2D1		781	CACNA2D1	calcium channel, voltage-dependent, alpha 2/delta subunit 1	CACNA2|CACNL2A|CCHL2A|LINC01112|lncRNA-N3	7	7q21-q22
CNTNAP2		26047	CNTNAP2	contactin associated protein-like 2	AUTS15|CASPR2|CDFE|NRXN4|PTHSL1	7	7q35
CEP85L		387119	CEP85L	centrosomal protein 85kDa-like	C6orf204|NY-BR-15|bA57K17.2	6	6q22
PLN		5350	PLN	phospholamban	CMD1P|CMH18|PLB	6	6q22.1
TIMP2		7077	TIMP2	TIMP metallopeptidase inhibitor 2	CSC-21K|DDC8	17	17q25
CDC42EP4		23580	CDC42EP4	CDC42 effector protein (Rho GTPase binding) 4	BORG4|CEP4|KAIA1777	17	17q24-q25
PECAM1		5175	PECAM1	platelet/endothelial cell adhesion molecule 1	CD31|CD31/EndoCAM|GPIIA'|PECA1|PECAM-1|endoCAM	17	17q23.3
CBX1		10951	CBX1	chromobox homolog 1	CBX|HP1-BETA|HP1Hs-beta|HP1Hsbeta|M31|MOD1|p25beta	17	17q21.32
SNX11		29916	SNX11	sorting nexin 11	-	17	17q21.32
ANKFN1		162282	ANKFN1	ankyrin-repeat and fibronectin type III domain containing 1	-	17	17q22
BCAS3		54828	BCAS3	breast carcinoma amplified sequence 3	GAOB1|MAAB	17	17q23
PPM1D		8493	PPM1D	protein phosphatase, Mg2+/Mn2+ dependent, 1D	PP2C-DELTA|WIP1	17	17q23.2
APPBP2		10513	APPBP2	amyloid beta precursor protein (cytoplasmic tail) binding protein 2	APP-BP2|HS.84084|PAT1	17	17q23.2
CA4		762	CA4	carbonic anhydrase IV	CAIV|Car4|RP17	17	17q23
GGNBP2		79893	GGNBP2	gametogenetin binding protein 2	DIF-3|DIF3|LCRG1|LZK1|ZFP403|ZNF403	17	17q12
LHX1		3975	LHX1	LIM homeobox 1	LIM-1|LIM1	17	17q12
AATF		26574	AATF	apoptosis antagonizing transcription factor	BFR2|CHE-1|CHE1|DED	17	17q12
TMEM132E		124842	TMEM132E	transmembrane protein 132E	DFNB99	17	17q12
CCL1		6346	CCL1	chemokine (C-C motif) ligand 1	I-309|P500|SCYA1|SISe|TCA3	17	17q12
CCL13		6357	CCL13	chemokine (C-C motif) ligand 13	CKb10|MCP-4|NCC-1|NCC1|SCYA13|SCYL1	17	17q11.2
CCL2		6347	CCL2	chemokine (C-C motif) ligand 2	GDCF-2|HC11|HSMCR30|MCAF|MCP-1|MCP1|SCYA2|SMC-CF	17	17q11.2-q12
NF1		4763	NF1	neurofibromin 1	NFNS|VRNF|WSS	17	17q11.2
SRRM3		222183	SRRM3	serine/arginine repetitive matrix 3	-	7	7q11.23
MYH11		4629	MYH11	myosin, heavy chain 11, smooth muscle	AAT4|FAA4|SMHC|SMMHC	16	16p13.11
NDE1		54820	NDE1	nudE neurodevelopment protein 1	HOM-TES-87|LIS4|MHAC|NDE|NUDE|NUDE1	16	16p13.11
TEKT5		146279	TEKT5	tektin 5	CT149	16	16p13.13
PDS5B		23047	PDS5B	PDS5 cohesin associated factor B	APRIN|AS3|CG008	13	13q12.3
PTPN18		26469	PTPN18	protein tyrosine phosphatase, non-receptor type 18 (brain-derived)	BDP1|PTP-HSCF	2	2q21.1
ALCAM		214	ALCAM	activated leukocyte cell adhesion molecule	CD166|MEMD	3	3q13.1
ARMC12		221481	ARMC12	armadillo repeat containing 12	C6orf81	6	6p21.31
CLPS		1208	CLPS	colipase, pancreatic	-	6	6p21.31
LHFPL5		222662	LHFPL5	lipoma HMGIC fusion partner-like 5	DFNB67|TMHS|dJ510O8.8	6	6p21.31
SRPK1		6732	SRPK1	SRSF protein kinase 1	SFRSK1	6	6p21.31
UPK3A		7380	UPK3A	uroplakin 3A	UP3A|UPIII|UPIIIA|UPK3	22	22q13.31
FAM118A		55007	FAM118A	family with sequence similarity 118, member A	C22orf8	22	22q13
WNT7B		7477	WNT7B	wingless-type MMTV integration site family, member 7B	-	22	22q13
MTHFD1L		25902	MTHFD1L	methylenetetrahydrofolate dehydrogenase (NADP+ dependent) 1-like	FTHFSDC1|MTC1THFS|dJ292B18.2	6	6q25.1
NFIC		4782	NFIC	nuclear factor I/C (CCAAT-binding transcription factor)	CTF|CTF5|NF-I|NFI	19	19p13.3
FZR1		51343	FZR1	fizzy/cell division cycle 20 related 1	CDC20C|CDH1|FZR|FZR2|HCDH|HCDH1	19	19p13.3

## Sheet: Cellular component
Analysis: Cellular component
Dataset name: Halter
Number of genes in the dataset: 82
Number of genes in the dataset (which are available in Cellular component database) :69
Number of genes in background: 19230
Is analysis quantitative: No
						Corrected p-values
Cellular component	No. of genes in the dataset	No.of genes in the background dataset	Percentage of genes	Fold enrichment	P-value (Hypergeometric test)	Bonferroni method	BH method	Q-value (Storey-Tibshirani method)
Plasma membrane	17	3479	20.7317	1.14647	0.307933	1	1	1	STOML1; ATPIF1; PTAFR; STX12; GPR3; SYTL1; SLC9A1; KAZN; CHIC2; STIM2; CACNA2D1; CNTNAP2; CDC42EP4; PECAM1; CA4; ALCAM; UPK3A;
Integral to membrane	5	1702	6.09756	0.690221	0.861875	1	1	1	PTAFR; SLC9A1; CNTNAP2; TMEM132E; LHFPL5;
Integral to plasma membrane	2	934	2.43902	0.504612	0.913013	1	1	1	PTAFR; GPR3;
Golgi aparatus	3	897	3.65854	0.786832	0.742664	1	1	1	KIFC3; CHIC2; APPBP2;
Nucleus	30	5847	36.5854	1.2035	0.136469	1	1	1	EMX2; PML; LOXL1; RCC1; SESN2; EYA3; RPA2; STX12; NUDC; NR0B2; GPATCH3; GRHL3; KAZN; KIFC3; STIM2; PECAM1; CBX1; PPM1D; APPBP2; GGNBP2; LHX1; AATF; SRRM3; MYH11; NDE1; PDS5B; ARMC12; SRPK1; NFIC; FZR1;
Actin cytoskeleton	2	132	2.43902	3.57028	0.109042	1	1	1	WASF2; CDC42EP4;
Nucleolus	8	1257	9.7561	1.49419	0.166447	1	1	1	PML; RCC1; ATPIF1; DNAJC8; FAM76A; CBX1; AATF; SRPK1;
Mitochondrion	3	1259	3.65854	0.560596	0.911096	1	1	1	ATPIF1; IFI6; MTHFD1L;
Cytosol	3	1178	3.65854	0.599143	0.885605	1	1	1	PLEKHM2; NDE1; FZR1;
Membrane fraction	1	346	1.21951	0.684456	0.77508	1	1	1	CA4;
Cytoplasm	25	5684	30.4878	1.03174	0.46812	1	1	1	PML; RCC1; PHACTR4; SESN2; EYA3; RPA2; FGR; WASF2; NUDC; NR0B2; KAZN; KIFC3; CDC42EP4; CBX1; APPBP2; AATF; CCL1; NF1; MYH11; NDE1; PTPN18; ALCAM; ARMC12; SRPK1; FZR1;
Exosomes	12	2043	14.6341	1.37843	0.157585	1	1	1	TBC1D21; FGR; WASF2; FCN3; SLC9A1; KIFC3; CACNA2D1; PECAM1; CA4; MYH11; ALCAM; UPK3A;
Perinuclear region	1	131	1.21951	1.80771	0.429764	1	1	1	PHACTR4;
Chromatin	2	32	2.43902	14.7239	0.0082001	1	1	1	CBX1; PDS5B;
Lysosome	7	1620	8.53659	1.01464	0.54282	1	1	1	DNAJC8; STX12; TMEM222; PLEKHM2; CACNA2D1; PECAM1; SNX11;
Endoplasmic reticulum	2	1104	2.43902	0.426909	0.953308	1	1	1	STIM2; UPK3A;
Endosome	1	303	1.21951	0.781587	0.728856	1	1	1	STX12;
Cell surface	1	205	1.21951	1.1552	0.585513	1	1	1	ATPIF1;
Extracellular	11	1825	13.4146	1.4146	0.152059	1	1	1	LOXL1; FCN3; TIMP2; PECAM1; CCL1; CCL13; CCL2; MYH11; CLPS; WNT7B; MTHFD1L;
Kinetochore	1	90	1.21951	2.63114	0.319883	1	1	1	NDE1;
Extracellular region	4	442	4.87805	2.12728	0.120076	1	1	1	LOXL1; FCN3; CCL2; WNT7B;
Membrane	2	350	2.43902	1.34657	0.441508	1	1	1	PTAFR; ALCAM;
PML body	1	37	1.21951	6.39904	0.146372	1	1	1	PML;
Extracellular space	4	404	4.87805	2.32737	0.0941222	1	1	1	PECAM1; CCL1; CCL13; CCL2;
Extracellular matrix	1	120	1.21951	1.97341	0.402136	1	1	1	LOXL1;
Nucleoplasm	4	449	4.87805	2.09412	0.125168	1	1	1	PML; RPA2; CBX1; FZR1;
Dendrite	2	27	2.43902	17.4495	0.00588336	1	1	1	CNTNAP2; NF1;
Centrosome	4	656	4.87805	1.43333	0.306533	1	1	1	PML; KIFC3; CEP85L; NDE1;
Cytoskeleton	2	427	2.43902	1.10375	0.54655	1	1	1	PECAM1; TEKT5;
Intracellular	1	151	1.21951	1.5683	0.476805	1	1	1	WASF2;
Mediator complex	1	23	1.21951	10.2924	0.0936611	1	1	1	MED18;
Voltage-gated calcium channel complex	1	20	1.21951	11.8355	0.0819543	1	1	1	CACNA2D1;
Microtubule	1	129	1.21951	1.83574	0.424837	1	1	1	KIFC3;
Insoluble fraction	1	13	1.21951	18.2036	0.0540543	1	1	1	PML;
DNA replication factor A complex	1	4	1.21951	59.0595	0.0169492	1	1	1	RPA2;
Nuclear matrix	1	37	1.21951	6.39904	0.146372	1	1	1	PML;
Cytoplasmic vesicle membrane	1	5	1.21951	47.2712	0.021142	1	1	1	APPBP2;
Spindle	1	30	1.21951	7.89165	0.120407	1	1	1	CBX1;
Nuclear membrane	1	78	1.21951	3.03587	0.283937	1	1	1	PML;
Lamellipodium	1	23	1.21951	10.2924	0.0936611	1	1	1	WASF2;
Microtubule cytoskeleton	1	47	1.21951	5.03783	0.182158	1	1	1	CDC42EP4;
Membrane raft	1	36	1.21951	6.57674	0.14271	1	1	1	STX12;
Axon	1	27	1.21951	8.76818	0.109041	1	1	1	NF1;
Voltage-gated potassium channel complex	1	42	1.21951	5.63743	0.164454	1	1	1	CNTNAP2;
Cytoplasmic vesicle	1	160	1.21951	1.48009	0.496703	1	1	1	APPBP2;
Platelet alpha granule membrane	1	11	1.21951	21.5103	0.0459302	1	1	1	PECAM1;
Muscle myosin complex	1	15	1.21951	15.7781	0.0621101	1	1	1	MYH11;
Zonula adherens	1	4	1.21951	59.0595	0.0169492	1	1	1	KIFC3;
Microtubule associated complex	1	24	1.21951	9.86375	0.0975305	1	1	1	APPBP2;
Condensed nuclear chromosome	1	12	1.21951	19.7193	0.0500008	1	1	1	RCC1;
Cornified envelope	1	19	1.21951	12.4581	0.0780189	1	1	1	KAZN;
Synapse	1	33	1.21951	7.17445	0.131629	1	1	1	PHACTR4;
Anaphase-promoting complex	1	18	1.21951	13.1498	0.0740669	1	1	1	FZR1;
Kinesin complex	1	9	1.21951	26.2851	0.0377371	1	1	1	KIFC3;
Juxtaparanode region of axon	1	1	1.21951	234.484	0.00426417	1	1	1	CNTNAP2;
Chromosome, centromeric region	1	19	1.21951	12.4581	0.0780189	1	1	1	CBX1;
Phagocytic vesicle	1	4	1.21951	59.0595	0.0169492	1	1	1	STX12;
Sarcoplasmic reticulum	2	32	2.43902	14.7239	0.0082001	1	1	1	PLN; CA4;
Nuclear heterochromatin	1	5	1.21951	47.2712	0.021142	1	1	1	CBX1;
Cell body fiber	1	2	1.21951	117.825	0.00851038	1	1	1	CNTNAP2;
Desmosome	1	11	1.21951	21.5103	0.0459302	1	1	1	KAZN;
Zymogen granule	1	34	1.21951	6.9635	0.135338	1	1	1	CLPS;
Mitochondrial proton-transporting ATP synthase complex	1	18	1.21951	13.1498	0.0740669	1	1	1	ATPIF1;
Axolemma	1	1	1.21951	234.484	0.00426417	1	1	1	CNTNAP2;
Nuclear chromatin	1	10	1.21951	23.6592	0.0418423	1	1	1	RCC1;

## Sheet: Molecular function
Analysis: Molecular function
Dataset name: Halter
Number of genes in the dataset: 82
Number of genes in the dataset (which are available in Molecular function database) :82
Number of genes in background: 19230
Is analysis quantitative: No
						Corrected p-values
Molecular function	No. of genes in the dataset	No.of genes in the background dataset	Percentage of genes	Fold enrichment	P-value (Hypergeometric test)	Bonferroni method	BH method	Q-value (Storey-Tibshirani method)
Molecular function unknown	26	5685	31.7073	1.07281	0.374579	1	1	1	FAM76A; CD164L2; SYTL1; TMEM222; WDTC1; FAM46B; KDF1; GPATCH3; GPN2; NIPAL3; STPG1; PLEKHM2; KAZN; GINS3; CHIC2; CEP85L; SNX11; ANKFN1; BCAS3; APPBP2; TMEM132E; SRRM3; TEKT5; ARMC12; LHFPL5; FAM118A;
Cell adhesion molecule activity	6	356	7.31707	3.95845	0.00414971	0.929535	0.377538	1	THEMIS2; FCN3; STIM2; CNTNAP2; PECAM1; ALCAM;
Transporter activity	1	576	1.21951	0.411154	0.917837	1	1	1	PML;
Protein-tyrosine kinase activity	1	38	1.21951	6.23069	0.150019	1	1	1	FGR;
Catalytic activity	3	532	3.65854	1.32666	0.396734	1	1	1	LOXL1; CA4; MTHFD1L;
GTPase activator activity	2	144	2.43902	3.27277	0.12578	1	1	1	TBC1D21; NF1;
Oxidoreductase activity	1	161	1.21951	1.47089	0.498867	1	1	1	SESN2;
Ion channel activity	1	66	1.21951	3.58777	0.246115	1	1	1	PLN;
Receptor binding	1	129	1.21951	1.83574	0.424837	1	1	1	WNT7B;
Structural molecule activity	1	269	1.21951	0.880371	0.685766	1	1	1	MYH11;
Structural constituent of cytoskeleton	1	137	1.21951	1.72855	0.444299	1	1	1	CDC42EP4;
Cytoskeletal protein binding	2	218	2.43902	2.16188	0.238144	1	1	1	WASF2; NDE1;
G-protein coupled receptor activity	2	736	2.43902	0.640361	0.826841	1	1	1	PTAFR; GPR3;
Protein serine/threonine kinase activity	1	301	1.21951	0.78678	0.726491	1	1	1	MAP3K6;
Transcription regulator activity	2	832	2.43902	0.566474	0.875303	1	1	1	PML; MED18;
Extracellular matrix structural constituent	1	166	1.21951	1.42659	0.509551	1	1	1	TIMP2;
Receptor activity	1	361	1.21951	0.656017	0.789298	1	1	1	UPK3A;
Ligand-dependent nuclear receptor activity	1	35	1.21951	6.7646	0.139032	1	1	1	NR0B2;
Transcription factor activity	6	842	7.31707	1.67367	0.149752	1	1	1	EMX2; GRHL3; LHX1; AATF; PDS5B; NFIC;
Lipase activity	1	19	1.21951	12.4581	0.0780189	1	1	1	CLPS;
Protein binding	2	182	2.43902	2.58949	0.182072	1	1	1	NUDC; FZR1;
DNA binding	3	654	3.65854	1.07918	0.531523	1	1	1	RPA2; CBX1; GGNBP2;
Chaperone activity	1	126	1.21951	1.87944	0.417366	1	1	1	DNAJC8;
Auxiliary transport protein activity	3	333	3.65854	2.11944	0.169787	1	1	1	STOML1; STX12; SLC9A1;
Motor activity	1	79	1.21951	2.99745	0.287003	1	1	1	KIFC3;
Voltage-gated ion channel activity	1	130	1.21951	1.82162	0.427306	1	1	1	CACNA2D1;
Phosphatase regulator activity	1	16	1.21951	14.7925	0.0661125	1	1	1	PHACTR4;
Enzyme inhibitor activity	1	8	1.21951	29.5666	0.0336146	1	1	1	ATPIF1;
Guanyl-nucleotide exchange factor activity	1	112	1.21951	2.11435	0.381215	1	1	1	RCC1;
Protein threonine/tyrosine kinase activity	1	28	1.21951	8.45514	0.112846	1	1	1	SRPK1;
Cytokine activity	1	107	1.21951	2.21314	0.367775	1	1	1	IFI6;
Protein tyrosine phosphatase activity	2	25	2.43902	18.845	0.00505632	1	0.377538	1	EYA3; PTPN18;
Chemokine activity	3	53	3.65854	13.3144	0.00150132	0.336295	0.336295	1	CCL1; CCL13; CCL2;
Protein serine/threonine phosphatase activity	1	44	1.21951	5.38124	0.171581	1	1	1	PPM1D;

## Sheet: Biological process
Analysis: Biological process
Dataset name: Halter
Number of genes in the dataset: 82
Number of genes in the dataset (which are available in Biological process database) :82
Number of genes in background: 19230
Is analysis quantitative: No
						Corrected p-values
Biological process	No. of genes in the dataset	No.of genes in the background dataset	Percentage of genes	Fold enrichment	P-value (Hypergeometric test)	Bonferroni method	BH method	Q-value (Storey-Tibshirani method)
Biological_process unknown	24	4731	29.2683	1.19001	0.19471	1	1	1	FAM76A; CD164L2; SYTL1; TMEM222; WDTC1; FAM46B; KDF1; GPATCH3; GPN2; NIPAL3; STPG1; PLEKHM2; KAZN; GINS3; CHIC2; CEP85L; SNX11; ANKFN1; TMEM132E; SRRM3; TEKT5; ARMC12; LHFPL5; FAM118A;
Protein metabolism	1	1323	1.21951	0.179007	0.997142	1	1	1	DNAJC8;
Metabolism	3	1683	3.65854	0.419365	0.978616	1	1	1	CA4; CLPS; MTHFD1L;
Energy pathways	3	1633	3.65854	0.432206	0.974496	1	1	1	ATPIF1; CA4; CLPS;
Cell growth and/or maintenance	7	1125	8.53659	1.46108	0.203244	1	1	1	LOXL1; WASF2; KIFC3; TIMP2; CDC42EP4; MYH11; NDE1;
Transport	4	1215	4.87805	0.773886	0.769301	1	1	1	STOML1; STX12; SLC9A1; CACNA2D1;
Cell communication	24	3713	29.2683	1.51628	0.0193408	1	1	1	TBC1D21; RCC1; SESN2; PTAFR; EYA3; THEMIS2; FGR; GPR3; MAP3K6; NUDC; NR0B2; STIM2; CNTNAP2; PLN; PECAM1; BCAS3; PPM1D; CCL1; CCL13; NF1; PTPN18; UPK3A; WNT7B; FZR1;
Signal transduction	25	3934	30.4878	1.4907	0.0204635	1	1	1	TBC1D21; RCC1; PHACTR4; SESN2; PTAFR; EYA3; THEMIS2; FGR; GPR3; MAP3K6; NUDC; NR0B2; STIM2; CNTNAP2; PLN; PECAM1; BCAS3; PPM1D; CCL1; CCL13; NF1; PTPN18; UPK3A; WNT7B; FZR1;
Regulation of nucleobase, nucleoside, nucleotide and nucleic acid metabolism	10	2828	12.1951	0.829977	0.784184	1	1	1	EMX2; MED18; RPA2; GRHL3; CBX1; GGNBP2; LHX1; PDS5B; SRPK1; NFIC;
Immune response	4	576	4.87805	1.6324	0.231048	1	1	1	IFI6; FCN3; CCL2; ALCAM;
Anti-apoptosis	1	32	1.21951	7.39858	0.127904	1	1	1	IFI6;
Apoptosis	1	220	1.21951	1.07644	0.611526	1	1	1	AATF;
Regulation of gene expression, epigenetic	2	66	2.43902	7.14001	0.0323111	1	1	1	PML; APPBP2;
Vesicle docking	1	4	1.21951	59.0595	0.0169492	1	1	1	SYTL1;

## Sheet: Biological pathway
Analysis: Biological pathway
Dataset name: Halter
Number of genes in the dataset: 82
Number of genes in the dataset (which are available in Biological pathway database) :29
Number of genes in background: 19230
Is analysis quantitative: No
						Corrected p-values
Biological pathway	No. of genes in the dataset	No.of genes in the background dataset	Percentage of genes	Fold enrichment	P-value (Hypergeometric test)	Bonferroni method	BH method	Q-value (Storey-Tibshirani method)
Vif-mediated degradation of APOBEC3G	1	69	1.21951	3.4318	0.255752	1	1	1	FZR1;
Nuclear import of Rev protein	1	30	1.21951	7.89165	0.120407	1	1	1	RCC1;
Interactions of Rev with host cellular proteins	1	33	1.21951	7.17445	0.131629	1	1	1	RCC1;
Developmental Biology	3	432	3.65854	1.63375	0.28008	1	1	1	MED18; MYH11; ALCAM;
Vpu mediated degradation of CD4	1	67	1.21951	3.53423	0.249341	1	1	1	FZR1;
Sema4D in semaphorin signaling	1	27	1.21951	8.76818	0.109041	1	1	1	MYH11;
Sema4D induced cell migration and growth-cone collapse	1	22	1.21951	10.76	0.0897753	1	1	1	MYH11;
Axon guidance	2	219	2.43902	2.15201	0.23972	1	1	1	MYH11; ALCAM;
Semaphorin interactions	1	64	1.21951	3.69987	0.239623	1	1	1	MYH11;
L1CAM interactions	1	79	1.21951	2.99745	0.287003	1	1	1	ALCAM;
Platelet sensitization by LDL	2	8	2.43902	58.8405	0.000494639	0.825059	0.825059	1	FGR; PECAM1;
Transcriptional Regulation of White Adipocyte Differentiation	1	69	1.21951	3.4318	0.255752	1	1	1	MED18;
Hemostasis	2	375	2.43902	1.2568	0.477077	1	1	1	FGR; PECAM1;
Platelet homeostasis	2	40	2.43902	11.7799	0.0126149	1	1	1	FGR; PECAM1;
Cell surface interactions at the vascular wall	1	72	1.21951	3.28883	0.265266	1	1	1	PECAM1;
Mitotic Telophase /Cytokinesis	1	18	1.21951	13.1498	0.0740669	1	1	1	NUDC;
Mitotic Prometaphase	2	99	2.43902	4.76025	0.066829	1	1	1	NUDC; NDE1;
Mitotic Prophase	1	62	1.21951	3.8192	0.233075	1	1	1	NDE1;
Golgi Cisternae Pericentriolar Stack Reorganization	1	62	1.21951	3.8192	0.233075	1	1	1	NDE1;
Mitotic M-M/G1 phases	4	242	4.87805	3.88529	0.0199308	1	1	1	RPA2; NUDC; NDE1; FZR1;
M Phase	2	158	2.43902	2.9828	0.146017	1	1	1	NUDC; NDE1;
DNA Replication	4	261	4.87805	3.60247	0.0254395	1	1	1	RPA2; NUDC; NDE1; FZR1;
PECAM1 interactions	1	7	1.21951	33.7844	0.0294746	1	1	1	PECAM1;
Smooth Muscle Contraction	1	24	1.21951	9.86375	0.0975305	1	1	1	MYH11;
Muscle contraction	1	50	1.21951	4.73562	0.192601	1	1	1	MYH11;
Host Interactions of HIV factors	2	141	2.43902	3.3424	0.121539	1	1	1	RCC1; FZR1;
Rev-mediated nuclear export of HIV-1 RNA	1	32	1.21951	7.39858	0.127904	1	1	1	RCC1;
Late Phase of HIV Life Cycle	1	92	1.21951	2.57394	0.325698	1	1	1	RCC1;
HIV Life Cycle	1	103	1.21951	2.29908	0.356815	1	1	1	RCC1;
HIV Infection	2	203	2.43902	2.32162	0.214589	1	1	1	RCC1; FZR1;
p75 NTR receptor-mediated signalling	1	39	1.21951	6.07097	0.153651	1	1	1	AATF;
Signalling by NGF	1	143	1.21951	1.65603	0.458468	1	1	1	AATF;
NRAGE signals death through JNK	1	8	1.21951	29.5666	0.0336146	1	1	1	AATF;
Cell death signalling via NRAGE, NRIF and NADE	1	21	1.21951	11.2722	0.0858731	1	1	1	AATF;
Signal Transduction	5	1208	6.09756	0.972478	0.592387	1	1	1	PTAFR; PECAM1; AATF; CCL2; FZR1;
Assembly of the pre-replicative complex	1	83	1.21951	2.85301	0.299137	1	1	1	FZR1;
DNA Replication Pre-Initiation	2	98	2.43902	4.80882	0.0656554	1	1	1	RPA2; FZR1;
M/G1 Transition	2	98	2.43902	4.80882	0.0656554	1	1	1	RPA2; FZR1;
Autodegradation of Cdh1 by Cdh1:APC/C	1	60	1.21951	3.94648	0.226471	1	1	1	FZR1;
APC/C:Cdc20 mediated degradation of Securin	1	66	1.21951	3.58777	0.246115	1	1	1	FZR1;
Conversion from APC/C:Cdc20 to APC/C:Cdh1 in late anaphase	1	16	1.21951	14.7925	0.0661125	1	1	1	FZR1;
APC/C:Cdh1 mediated degradation of Cdc20 and other APC/C:Cdh1 targeted proteins in late mitosis/early G1	1	69	1.21951	3.4318	0.255752	1	1	1	FZR1;
Loss of Nlp from mitotic centrosomes	1	61	1.21951	3.8818	0.22978	1	1	1	NDE1;
Regulation of mitotic cell cycle	1	81	1.21951	2.92345	0.293096	1	1	1	FZR1;
Recruitment of NuMA to mitotic centrosomes	1	12	1.21951	19.7193	0.0500008	1	1	1	FZR1;
Loss of proteins required for interphase microtubule organizationÃÂ from the centrosome	1	61	1.21951	3.8818	0.22978	1	1	1	NDE1;
Phosphorylation of Emi1	1	20	1.21951	11.8355	0.0819543	1	1	1	FZR1;
APC/C-mediated degradation of cell cycle proteins	1	81	1.21951	2.92345	0.293096	1	1	1	FZR1;
Regulation of APC/C activators between G1/S and early anaphase	1	78	1.21951	3.03587	0.283937	1	1	1	FZR1;
APC/C:Cdc20 mediated degradation of mitotic proteins	1	71	1.21951	3.33514	0.262108	1	1	1	FZR1;
Phosphorylation of the APC/C	1	18	1.21951	13.1498	0.0740669	1	1	1	FZR1;
Activation of APC/C and APC/C:Cdc20 mediated degradation of mitotic proteins	1	72	1.21951	3.28883	0.265266	1	1	1	FZR1;
SCF-beta-TrCP mediated degradation of Emi1	1	70	1.21951	3.38278	0.258937	1	1	1	FZR1;
Ubiquitin-dependent degradation of Cyclin D	1	66	1.21951	3.58777	0.246115	1	1	1	FZR1;
Ubiquitin-dependent degradation of Cyclin D1	1	66	1.21951	3.58777	0.246115	1	1	1	FZR1;
Mitotic G2-G2/M phases	2	99	2.43902	4.76025	0.066829	1	1	1	NDE1; FZR1;
G2/M Transition	2	96	2.43902	4.90899	0.0633297	1	1	1	NDE1; FZR1;
Recruitment of mitotic centrosome proteins and complexes	2	70	2.43902	6.73207	0.0359846	1	1	1	NDE1; FZR1;
Centrosome maturation	2	70	2.43902	6.73207	0.0359846	1	1	1	NDE1; FZR1;
SCF(Skp2)-mediated degradation of p27/p21	1	67	1.21951	3.53423	0.249341	1	1	1	FZR1;
Cyclin E associated events during G1/S transition	1	78	1.21951	3.03587	0.283937	1	1	1	FZR1;
G1/S Transition	2	117	2.43902	4.02797	0.0890784	1	1	1	RPA2; FZR1;
S Phase	2	121	2.43902	3.89482	0.094287	1	1	1	RPA2; FZR1;
Cyclin A:Cdk2-associated events at S phase entry	1	90	1.21951	2.63114	0.319883	1	1	1	FZR1;
Mitotic G1-G1/S phases	2	140	2.43902	3.36628	0.120133	1	1	1	RPA2; FZR1;
Cell Cycle, Mitotic	4	317	4.87805	2.96609	0.0466005	1	1	1	RPA2; NUDC; NDE1; FZR1;
mRNA Splicing - Major Pathway	1	107	1.21951	2.21314	0.367775	1	1	1	DNAJC8;
mRNA Splicing	1	107	1.21951	2.21314	0.367775	1	1	1	DNAJC8;
Processing of Capped Intron-Containing Pre-mRNA	1	138	1.21951	1.71602	0.446686	1	1	1	DNAJC8;
mRNA Processing	1	157	1.21951	1.50837	0.490155	1	1	1	DNAJC8;
Unfolded Protein Response	1	63	1.21951	3.75859	0.236356	1	1	1	CCL2;
PERK regulated gene expression	1	11	1.21951	21.5103	0.0459302	1	1	1	CCL2;
Extension of Telomeres	1	28	1.21951	8.45514	0.112846	1	1	1	RPA2;
Telomere C-strand (Lagging Strand) Synthesis	1	22	1.21951	10.76	0.0897753	1	1	1	RPA2;
Telomere Maintenance	1	49	1.21951	4.83225	0.189135	1	1	1	RPA2;
Diabetes pathways	1	216	1.21951	1.09638	0.604751	1	1	1	CCL2;
Processive synthesis on the C-strand of the telomere	1	11	1.21951	21.5103	0.0459302	1	1	1	RPA2;
Removal of the Flap Intermediate from the C-strand	1	10	1.21951	23.6592	0.0418423	1	1	1	RPA2;
Processive synthesis on the lagging strand	1	15	1.21951	15.7781	0.0621101	1	1	1	RPA2;
Removal of the Flap Intermediate	1	14	1.21951	16.9043	0.0580907	1	1	1	RPA2;
Lagging Strand Synthesis	1	20	1.21951	11.8355	0.0819543	1	1	1	RPA2;
Removal of licensing factors from origins	1	85	1.21951	2.78589	0.305127	1	1	1	FZR1;
Chromosome Maintenance	1	69	1.21951	3.4318	0.255752	1	1	1	RPA2;
Regulation of DNA replication	1	88	1.21951	2.69093	0.314018	1	1	1	FZR1;
CDT1 association with the CDC6:ORC:origin complex	1	74	1.21951	3.19995	0.271543	1	1	1	FZR1;
Activation of the pre-replicative complex	1	30	1.21951	7.89165	0.120407	1	1	1	RPA2;
Synthesis of DNA	2	109	2.43902	4.32357	0.0789378	1	1	1	RPA2; FZR1;
Switching of origins to a post-replicative state	1	83	1.21951	2.85301	0.299137	1	1	1	FZR1;
Orc1 removal from chromatin	1	83	1.21951	2.85301	0.299137	1	1	1	FZR1;
CDK-mediated phosphorylation and removal of Cdc6	1	66	1.21951	3.58777	0.246115	1	1	1	FZR1;
DNA strand elongation	1	31	1.21951	7.63717	0.124163	1	1	1	RPA2;
Chemokine receptors bind chemokines	1	42	1.21951	5.63743	0.164454	1	1	1	CCL2;
Signaling by GPCR	2	800	2.43902	0.589133	0.860712	1	1	1	PTAFR; CCL2;
GPCR ligand binding	2	336	2.43902	1.40267	0.421033	1	1	1	PTAFR; CCL2;
Class A/1 (Rhodopsin-like receptors)	2	274	2.43902	1.72006	0.326472	1	1	1	PTAFR; CCL2;
Peptide ligand-binding receptors	1	167	1.21951	1.41805	0.51166	1	1	1	CCL2;
GPCR downstream signaling	1	530	1.21951	0.446838	0.899404	1	1	1	PTAFR;
G alpha (q) signalling events	1	120	1.21951	1.97341	0.402136	1	1	1	PTAFR;
Adaptive Immune System	2	237	2.43902	1.98858	0.268161	1	1	1	PECAM1; FZR1;
Immune System	5	522	6.09756	2.25046	0.0722035	1	1	1	PML; PTAFR; IFI6; PECAM1; FZR1;
Formation and Maturation of mRNA Transcript	1	185	1.21951	1.28009	0.548136	1	1	1	DNAJC8;
Signaling by Wnt	1	75	1.21951	3.15729	0.274661	1	1	1	FZR1;
Degradation of beta-catenin by the destruction complex	1	75	1.21951	3.15729	0.274661	1	1	1	FZR1;
Integrin cell surface interactions	1	72	1.21951	3.28883	0.265266	1	1	1	PECAM1;
Gene Expression	1	378	1.21951	0.626514	0.804341	1	1	1	DNAJC8;
Vitamin A uptake in enterocytes	1	7	1.21951	33.7844	0.0294746	1	1	1	CLPS;
DNA Repair	1	106	1.21951	2.23402	0.365052	1	1	1	RPA2;
Metabolism of steroid hormones and vitamins A and D	1	32	1.21951	7.39858	0.127904	1	1	1	CLPS;
Assembly of the RAD51-ssDNA nucleoprotein complex	1	5	1.21951	47.2712	0.021142	1	1	1	RPA2;
Formation of incision complex in GG-NER	1	20	1.21951	11.8355	0.0819543	1	1	1	RPA2;
Nucleotide Excision Repair	1	49	1.21951	4.83225	0.189135	1	1	1	RPA2;
Global Genomic NER (GG-NER)	1	33	1.21951	7.17445	0.131629	1	1	1	RPA2;
Homologous Recombination Repair	1	22	1.21951	10.76	0.0897753	1	1	1	RPA2;
Double-Strand Break Repair	1	27	1.21951	8.76818	0.109041	1	1	1	RPA2;
Homologous recombination repair of replication-independent double-strand breaks	1	22	1.21951	10.76	0.0897753	1	1	1	RPA2;
Processing of DNA double-strand break ends	1	3	1.21951	78.6806	0.0127387	1	1	1	RPA2;
Homologous DNA pairing and strand exchange	1	7	1.21951	33.7844	0.0294746	1	1	1	RPA2;
Presynaptic phase of homologous DNA pairing and strand exchange	1	6	1.21951	39.4058	0.0253171	1	1	1	RPA2;
Metabolism	1	823	1.21951	0.287759	0.972525	1	1	1	FZR1;
Repair synthesis of patch ~27-30 bases long by DNA polymerase	1	15	1.21951	15.7781	0.0621101	1	1	1	RPA2;
Repair synthesis for gap-filling by DNA polymerase in TC-NER	1	15	1.21951	15.7781	0.0621101	1	1	1	RPA2;
Gap-filling DNA repair synthesis and ligation in TC-NER	1	16	1.21951	14.7925	0.0661125	1	1	1	RPA2;
Transcription-coupled NER (TC-NER)	1	44	1.21951	5.38124	0.171581	1	1	1	RPA2;
Dual incision reaction in GG-NER	1	20	1.21951	11.8355	0.0819543	1	1	1	RPA2;
Gap-filling DNA repair synthesis and ligation in GG-NER	1	16	1.21951	14.7925	0.0661125	1	1	1	RPA2;
Stabilization of p53	1	69	1.21951	3.4318	0.255752	1	1	1	FZR1;
p53-Dependent G1 DNA Damage Response	1	72	1.21951	3.28883	0.265266	1	1	1	FZR1;
p53-Dependent G1/S DNA damage checkpoint	1	72	1.21951	3.28883	0.265266	1	1	1	FZR1;
G1/S DNA Damage Checkpoints	1	76	1.21951	3.11576	0.277766	1	1	1	FZR1;
Cell Cycle Checkpoints	2	118	2.43902	3.99383	0.0903722	1	1	1	RPA2; FZR1;
Autodegradation of the E3 ubiquitin ligase COP1	1	68	1.21951	3.48226	0.252553	1	1	1	FZR1;
G2/M Checkpoints	1	43	1.21951	5.50636	0.168025	1	1	1	RPA2;
p53-Independent G1/S DNA damage checkpoint	1	70	1.21951	3.38278	0.258937	1	1	1	FZR1;
Ubiquitin Mediated Degradation of Phosphorylated Cdc25A	1	69	1.21951	3.4318	0.255752	1	1	1	FZR1;
p53-Independent DNA Damage Response	1	70	1.21951	3.38278	0.258937	1	1	1	FZR1;
Activation of ATR in response to replication stress	1	37	1.21951	6.39904	0.146372	1	1	1	RPA2;
Meiotic Recombination	1	42	1.21951	5.63743	0.164454	1	1	1	RPA2;
Meiosis	1	72	1.21951	3.28883	0.265266	1	1	1	RPA2;
Regulation of ornithine decarboxylase (ODC)	1	70	1.21951	3.38278	0.258937	1	1	1	FZR1;
Regulation of mRNA Stability by Proteins that Bind AU-rich Elements	1	104	1.21951	2.27698	0.359572	1	1	1	FZR1;
Destabilization of mRNA by AUF1 (hnRNP D0)	1	71	1.21951	3.33514	0.262108	1	1	1	FZR1;
Metabolism of mRNA	1	234	1.21951	1.01204	0.634347	1	1	1	FZR1;
Metabolism of RNA	1	281	1.21951	0.842776	0.701696	1	1	1	FZR1;
Metabolism of amino acids and derivatives	1	188	1.21951	1.25966	0.553947	1	1	1	FZR1;
Transmembrane transport of small molecules	1	378	1.21951	0.626514	0.804341	1	1	1	SLC9A1;
Sodium/Proton exchangers	1	9	1.21951	26.2851	0.0377371	1	1	1	SLC9A1;
Transport of inorganic cations/anions and amino acids/oligopeptides	1	94	1.21951	2.51918	0.331464	1	1	1	SLC9A1;
SLC-mediated transmembrane transport	1	247	1.21951	0.958781	0.654349	1	1	1	SLC9A1;
Digestion of dietary lipid	1	4	1.21951	59.0595	0.0169492	1	1	1	CLPS;
Lipid digestion, mobilization, and transport	1	46	1.21951	5.14733	0.178647	1	1	1	CLPS;
Metabolism of lipids and lipoproteins	1	257	1.21951	0.921476	0.668997	1	1	1	CLPS;
Class I MHC mediated antigen processing & presentation	1	101	1.21951	2.34461	0.351265	1	1	1	FZR1;
Antigen processing: Ubiquitination & Proteasome degradation	1	69	1.21951	3.4318	0.255752	1	1	1	FZR1;
CD28 co-stimulation	1	36	1.21951	6.57674	0.14271	1	1	1	PECAM1;
CTLA4 inhibitory signaling	1	5	1.21951	47.2712	0.021142	1	1	1	PECAM1;
Costimulation by the CD28 family	1	52	1.21951	4.55352	0.19949	1	1	1	PECAM1;
Transcription	1	178	1.21951	1.33042	0.534282	1	1	1	NFIC;
RNA Polymerase I, RNA Polymerase III, and Mitochondrial Transcription	1	92	1.21951	2.57394	0.325698	1	1	1	NFIC;
Regulation of Apoptosis	1	75	1.21951	3.15729	0.274661	1	1	1	FZR1;
Regulation of activated PAK-2p34 by proteasome mediated degradation	1	66	1.21951	3.58777	0.246115	1	1	1	FZR1;
RNA Polymerase III Transcription	1	34	1.21951	6.9635	0.135338	1	1	1	NFIC;
RNA Polymerase III Abortive And Retractive Initiation	1	34	1.21951	6.9635	0.135338	1	1	1	NFIC;
RNA Polymerase III Transcription Termination	1	17	1.21951	13.9229	0.0700981	1	1	1	NFIC;
Cdc20:Phospho-APC/C mediated degradation of Cyclin A	1	69	1.21951	3.4318	0.255752	1	1	1	FZR1;
Apoptosis	1	158	1.21951	1.49882	0.492347	1	1	1	FZR1;
Cross-presentation of soluble exogenous antigens (endosomes)	1	67	1.21951	3.53423	0.249341	1	1	1	FZR1;
Antigen processing-Cross presentation	1	86	1.21951	2.7535	0.308104	1	1	1	FZR1;
ER-Phagosome pathway	1	80	1.21951	2.95999	0.290056	1	1	1	FZR1;
Cytokine Signaling in Immune system	3	193	3.65854	3.65678	0.0495253	1	1	1	PML; PTAFR; IFI6;
Interferon alpha/beta signaling	1	77	1.21951	3.0753	0.280858	1	1	1	IFI6;
Interferon Signaling	3	98	3.65854	7.20127	0.00849805	1	1	1	PML; PTAFR; IFI6;
Interferon gamma signaling	2	47	2.43902	10.0258	0.0171506	1	1	1	PML; PTAFR;
folate polyglutamylation	1	5	1.21951	47.2712	0.021142	1	1	1	MTHFD1L;
folate transformations	1	9	1.21951	26.2851	0.0377371	1	1	1	MTHFD1L;
Validated transcriptional targets of TAp63 isoforms	1	54	1.21951	4.3849	0.206322	1	1	1	PML;
Wnt signaling network	1	200	1.21951	1.18408	0.576465	1	1	1	WNT7B;
Regulation of cytoplasmic and nuclear SMAD2/3 signaling	4	305	4.87805	3.08278	0.0414368	1	1	1	PML; FGR; MAP3K6; SLC9A1;
EphrinA-EPHA pathway	1	43	1.21951	5.50636	0.168025	1	1	1	FGR;
EPHA forward signaling	1	31	1.21951	7.63717	0.124163	1	1	1	FGR;
Syndecan-1-mediated signaling events	10	1297	12.1951	1.80969	0.0486839	1	1	1	PML; RCC1; FGR; WASF2; MAP3K6; SLC9A1; KIFC3; PPM1D; CCL2; NF1;
Regulation of CDC42 activity	7	768	8.53659	2.14025	0.0453782	1	1	1	PML; FGR; WASF2; MAP3K6; SLC9A1; CCL2; NF1;
Glypican pathway	11	1335	13.4146	1.93382	0.0259396	1	1	1	PML; RCC1; FGR; WASF2; MAP3K6; SLC9A1; KIFC3; PPM1D; CCL2; NF1; WNT7B;
GMCSF-mediated signaling events	10	1289	12.1951	1.82092	0.047024	1	1	1	PML; RCC1; FGR; WASF2; MAP3K6; SLC9A1; KIFC3; PPM1D; CCL2; NF1;
Insulin Pathway	10	1285	12.1951	1.82659	0.0462088	1	1	1	PML; RCC1; FGR; WASF2; MAP3K6; SLC9A1; KIFC3; PPM1D; CCL2; NF1;
C-MYC pathway	2	149	2.43902	3.16296	0.132927	1	1	1	PML; RCC1;
Stabilization and expansion of the E-cadherin adherens junction	2	275	2.43902	1.7138	0.328036	1	1	1	WASF2; KIFC3;
FOXA transcription factor networks	2	81	2.43902	5.81795	0.046858	1	1	1	NF1; NFIC;
Glypican 3 network	1	206	1.21951	1.1496	0.5873	1	1	1	WNT7B;
Nectin adhesion pathway	10	1292	12.1951	1.81669	0.0476419	1	1	1	PML; RCC1; FGR; WASF2; MAP3K6; SLC9A1; KIFC3; PPM1D; CCL2; NF1;
Validated nuclear estrogen receptor beta network	1	15	1.21951	15.7781	0.0621101	1	1	1	NR0B2;
TRAIL signaling pathway	10	1325	12.1951	1.77144	0.0548064	1	1	1	PML; RCC1; FGR; WASF2; MAP3K6; SLC9A1; KIFC3; PPM1D; CCL2; NF1;
IGF1 pathway	10	1288	12.1951	1.82233	0.0468193	1	1	1	PML; RCC1; FGR; WASF2; MAP3K6; SLC9A1; KIFC3; PPM1D; CCL2; NF1;
PLK1 signaling events	2	104	2.43902	4.53141	0.0728006	1	1	1	NUDC; FZR1;
Lissencephaly gene (LIS1) in neuronal migration and development	1	31	1.21951	7.63717	0.124163	1	1	1	NUDC;
ATF-2 transcription factor network	1	59	1.21951	4.01336	0.223148	1	1	1	NF1;
CDC42 signaling events	7	755	8.53659	2.1771	0.0420384	1	1	1	PML; FGR; WASF2; MAP3K6; SLC9A1; CCL2; NF1;
Signaling events mediated by Hepatocyte Growth Factor Receptor (c-Met)	10	1290	12.1951	1.81951	0.0472294	1	1	1	PML; RCC1; FGR; WASF2; MAP3K6; SLC9A1; KIFC3; PPM1D; CCL2; NF1;
Glypican 1 network	10	1296	12.1951	1.81108	0.0484742	1	1	1	PML; RCC1; FGR; WASF2; MAP3K6; SLC9A1; KIFC3; PPM1D; CCL2; NF1;
Validated targets of C-MYC transcriptional activation	1	81	1.21951	2.92345	0.293096	1	1	1	RCC1;
PDGF receptor signaling network	10	1290	12.1951	1.81951	0.0472294	1	1	1	PML; RCC1; FGR; WASF2; MAP3K6; SLC9A1; KIFC3; PPM1D; CCL2; NF1;
EphrinB-EPHB pathway	1	60	1.21951	3.94648	0.226471	1	1	1	FGR;
Integrin family cell surface interactions	11	1375	13.4146	1.87756	0.0313114	1	1	1	PML; RCC1; FGR; WASF2; MAP3K6; SLC9A1; KIFC3; PECAM1; PPM1D; CCL2; NF1;
IL1-mediated signaling events	3	234	3.65854	3.01609	0.0783725	1	1	1	FGR; MAP3K6; SLC9A1;
Fanconi anemia pathway	1	48	1.21951	4.9329	0.185654	1	1	1	RPA2;
Internalization of ErbB1	10	1285	12.1951	1.82659	0.0462088	1	1	1	PML; RCC1; FGR; WASF2; MAP3K6; SLC9A1; KIFC3; PPM1D; CCL2; NF1;
TGF-beta receptor signaling	4	305	4.87805	3.08278	0.0414368	1	1	1	PML; FGR; MAP3K6; SLC9A1;
FOXA2 and FOXA3 transcription factor networks	1	43	1.21951	5.50636	0.168025	1	1	1	NF1;
Signaling events mediated by VEGFR1 and VEGFR2	10	1293	12.1951	1.81529	0.047849	1	1	1	PML; RCC1; FGR; WASF2; MAP3K6; SLC9A1; KIFC3; PPM1D; CCL2; NF1;
Beta1 integrin cell surface interactions	10	1348	12.1951	1.74122	0.0602068	1	1	1	PML; RCC1; FGR; WASF2; MAP3K6; SLC9A1; KIFC3; PPM1D; CCL2; NF1;
Thromboxane A2 receptor signaling	1	54	1.21951	4.3849	0.206322	1	1	1	FGR;
Urokinase-type plasminogen activator (uPA) and uPAR-mediated signaling	10	1285	12.1951	1.82659	0.0462088	1	1	1	PML; RCC1; FGR; WASF2; MAP3K6; SLC9A1; KIFC3; PPM1D; CCL2; NF1;
Signaling mediated by p38-alpha and p38-beta	1	50	1.21951	4.73562	0.192601	1	1	1	SLC9A1;
Signaling by Aurora kinases	1	98	1.21951	2.41637	0.342851	1	1	1	FZR1;
Validated nuclear estrogen receptor alpha network	1	64	1.21951	3.69987	0.239623	1	1	1	NR0B2;
Polo-like kinase signaling events in the cell cycle	2	109	2.43902	4.32357	0.0789378	1	1	1	NUDC; FZR1;
IFN-gamma pathway	10	1293	12.1951	1.81529	0.047849	1	1	1	PML; RCC1; FGR; WASF2; MAP3K6; SLC9A1; KIFC3; PPM1D; CCL2; NF1;
Regulation of RAC1 activity	3	205	3.65854	3.44274	0.0573199	1	1	1	WASF2; SLC9A1; NF1;
PAR1-mediated thrombin signaling events	10	1296	12.1951	1.81108	0.0484742	1	1	1	PML; RCC1; FGR; WASF2; MAP3K6; SLC9A1; KIFC3; PPM1D; CCL2; NF1;
Beta3 integrin cell surface interactions	1	43	1.21951	5.50636	0.168025	1	1	1	PECAM1;
Regulation of p38-alpha and p38-beta	2	164	2.43902	2.87368	0.154888	1	1	1	FGR; SLC9A1;
PDGFR-beta signaling pathway	10	1285	12.1951	1.82659	0.0462088	1	1	1	PML; RCC1; FGR; WASF2; MAP3K6; SLC9A1; KIFC3; PPM1D; CCL2; NF1;
p63 transcription factor network	1	105	1.21951	2.2553	0.362318	1	1	1	PML;
E-cadherin signaling in the nascent adherens junction	2	275	2.43902	1.7138	0.328036	1	1	1	WASF2; KIFC3;
Integrin-linked kinase signaling	6	654	7.31707	2.15478	0.0604243	1	1	1	PML; FGR; MAP3K6; SLC9A1; CCL2; NF1;
Ephrin B reverse signaling	1	30	1.21951	7.89165	0.120407	1	1	1	FGR;
p38 MAPK signaling pathway	3	189	3.65854	3.73417	0.0470517	1	1	1	FGR; MAP3K6; SLC9A1;
EGF receptor (ErbB1) signaling pathway	10	1285	12.1951	1.82659	0.0462088	1	1	1	PML; RCC1; FGR; WASF2; MAP3K6; SLC9A1; KIFC3; PPM1D; CCL2; NF1;
Thrombin/protease-activated receptor (PAR) pathway	10	1297	12.1951	1.80969	0.0486839	1	1	1	PML; RCC1; FGR; WASF2; MAP3K6; SLC9A1; KIFC3; PPM1D; CCL2; NF1;
Class I PI3K signaling events	10	1285	12.1951	1.82659	0.0462088	1	1	1	PML; RCC1; FGR; WASF2; MAP3K6; SLC9A1; KIFC3; PPM1D; CCL2; NF1;
Arf6 signaling events	10	1285	12.1951	1.82659	0.0462088	1	1	1	PML; RCC1; FGR; WASF2; MAP3K6; SLC9A1; KIFC3; PPM1D; CCL2; NF1;
Plasma membrane estrogen receptor signaling	10	1298	12.1951	1.80829	0.0488941	1	1	1	PML; RCC1; FGR; WASF2; MAP3K6; SLC9A1; KIFC3; PPM1D; CCL2; NF1;
p73 transcription factor network	1	78	1.21951	3.03587	0.283937	1	1	1	PML;
IL3-mediated signaling events	10	1292	12.1951	1.81669	0.0476419	1	1	1	PML; RCC1; FGR; WASF2; MAP3K6; SLC9A1; KIFC3; PPM1D; CCL2; NF1;
AP-1 transcription factor network	6	621	7.31707	2.26928	0.0493132	1	1	1	PML; FGR; MAP3K6; SLC9A1; CCL2; NF1;
amb2 Integrin signaling	1	40	1.21951	5.91923	0.157267	1	1	1	FGR;
mTOR signaling pathway	10	1285	12.1951	1.82659	0.0462088	1	1	1	PML; RCC1; FGR; WASF2; MAP3K6; SLC9A1; KIFC3; PPM1D; CCL2; NF1;
RAC1 signaling pathway	3	205	3.65854	3.44274	0.0573199	1	1	1	WASF2; SLC9A1; NF1;
ErbB receptor signaling network	10	1308	12.1951	1.79447	0.0510307	1	1	1	PML; RCC1; FGR; WASF2; MAP3K6; SLC9A1; KIFC3; PPM1D; CCL2; NF1;
Signaling events mediated by focal adhesion kinase	10	1285	12.1951	1.82659	0.0462088	1	1	1	PML; RCC1; FGR; WASF2; MAP3K6; SLC9A1; KIFC3; PPM1D; CCL2; NF1;
VEGF and VEGFR signaling network	10	1301	12.1951	1.80412	0.0495286	1	1	1	PML; RCC1; FGR; WASF2; MAP3K6; SLC9A1; KIFC3; PPM1D; CCL2; NF1;
Alpha9 beta1 integrin signaling events	10	1302	12.1951	1.80274	0.0497413	1	1	1	PML; RCC1; FGR; WASF2; MAP3K6; SLC9A1; KIFC3; PPM1D; CCL2; NF1;
IL8- and CXCR1-mediated signaling events	1	28	1.21951	8.45514	0.112846	1	1	1	FGR;
Syndecan-2-mediated signaling events	1	77	1.21951	3.0753	0.280858	1	1	1	NF1;
ALK1 pathway	4	324	4.87805	2.90201	0.0497717	1	1	1	PML; FGR; MAP3K6; SLC9A1;
Arf6 downstream pathway	10	1285	12.1951	1.82659	0.0462088	1	1	1	PML; RCC1; FGR; WASF2; MAP3K6; SLC9A1; KIFC3; PPM1D; CCL2; NF1;
Signaling events mediated by PTP1B	1	52	1.21951	4.55352	0.19949	1	1	1	FGR;
Validated transcriptional targets of AP1 family members Fra1 and Fra2	1	134	1.21951	1.76725	0.437078	1	1	1	CCL2;
CXCR4-mediated signaling events	1	190	1.21951	1.2464	0.557781	1	1	1	FGR;
S1P1 pathway	10	1285	12.1951	1.82659	0.0462088	1	1	1	PML; RCC1; FGR; WASF2; MAP3K6; SLC9A1; KIFC3; PPM1D; CCL2; NF1;
FOXA1 transcription factor network	1	44	1.21951	5.38124	0.171581	1	1	1	NFIC;
Alpha-synuclein signaling	1	33	1.21951	7.17445	0.131629	1	1	1	FGR;
ATM pathway	3	307	3.65854	2.29893	0.143339	1	1	1	PML; RPA2; PPM1D;
TNF receptor signaling pathway	3	299	3.65854	2.36044	0.135505	1	1	1	FGR; MAP3K6; SLC9A1;
p53 pathway	2	189	2.43902	2.49358	0.192833	1	1	1	PML; PPM1D;
ErbB1 downstream signaling	10	1285	12.1951	1.82659	0.0462088	1	1	1	PML; RCC1; FGR; WASF2; MAP3K6; SLC9A1; KIFC3; PPM1D; CCL2; NF1;
EGFR-dependent Endothelin signaling events	10	1286	12.1951	1.82517	0.0464117	1	1	1	PML; RCC1; FGR; WASF2; MAP3K6; SLC9A1; KIFC3; PPM1D; CCL2; NF1;
IL8-mediated signaling events	1	38	1.21951	6.23069	0.150019	1	1	1	FGR;
ATR signaling pathway	3	250	3.65854	2.82307	0.0912438	1	1	1	PML; RPA2; PPM1D;
Regulation of nuclear SMAD2/3 signaling	4	305	4.87805	3.08278	0.0414368	1	1	1	PML; FGR; MAP3K6; SLC9A1;
ALK1 signaling events	4	321	4.87805	2.92913	0.0483983	1	1	1	PML; FGR; MAP3K6; SLC9A1;
Arf6 trafficking events	10	1285	12.1951	1.82659	0.0462088	1	1	1	PML; RCC1; FGR; WASF2; MAP3K6; SLC9A1; KIFC3; PPM1D; CCL2; NF1;
E-cadherin signaling events	2	280	2.43902	1.6832	0.335842	1	1	1	WASF2; KIFC3;
Androgen-mediated signaling	1	130	1.21951	1.82162	0.427306	1	1	1	APPBP2;
Endothelins	10	1304	12.1951	1.79997	0.0501686	1	1	1	PML; RCC1; FGR; WASF2; MAP3K6; SLC9A1; KIFC3; PPM1D; CCL2; NF1;
Regulation of retinoblastoma protein	1	66	1.21951	3.58777	0.246115	1	1	1	AATF;
IL5-mediated signaling events	10	1289	12.1951	1.82092	0.047024	1	1	1	PML; RCC1; FGR; WASF2; MAP3K6; SLC9A1; KIFC3; PPM1D; CCL2; NF1;
IL23-mediated signaling events	1	66	1.21951	3.58777	0.246115	1	1	1	CCL2;
Direct p53 effectors	1	138	1.21951	1.71602	0.446686	1	1	1	PML;
Sphingosine 1-phosphate (S1P) pathway	10	1308	12.1951	1.79447	0.0510307	1	1	1	PML; RCC1; FGR; WASF2; MAP3K6; SLC9A1; KIFC3; PPM1D; CCL2; NF1;
Regulation of Androgen receptor activity	1	108	1.21951	2.19265	0.370486	1	1	1	APPBP2;
Proteoglycan syndecan-mediated signaling events	10	1342	12.1951	1.749	0.0587653	1	1	1	PML; RCC1; FGR; WASF2; MAP3K6; SLC9A1; KIFC3; PPM1D; CCL2; NF1;
IL8- and CXCR2-mediated signaling events	1	34	1.21951	6.9635	0.135338	1	1	1	FGR;
BMP receptor signaling	3	226	3.65854	3.12285	0.0722629	1	1	1	FGR; MAP3K6; SLC9A1;
Aurora A signaling	1	64	1.21951	3.69987	0.239623	1	1	1	FZR1;
RhoA signaling pathway	3	205	3.65854	3.44274	0.0573199	1	1	1	WASF2; SLC9A1; NF1;
Class I PI3K signaling events mediated by Akt	10	1285	12.1951	1.82659	0.0462088	1	1	1	PML; RCC1; FGR; WASF2; MAP3K6; SLC9A1; KIFC3; PPM1D; CCL2; NF1;
LKB1 signaling events	10	1305	12.1951	1.79859	0.0503832	1	1	1	PML; RCC1; FGR; WASF2; MAP3K6; SLC9A1; KIFC3; PPM1D; CCL2; NF1;
Regulation of RhoA activity	3	205	3.65854	3.44274	0.0573199	1	1	1	WASF2; SLC9A1; NF1;
AndrogenReceptor	1	78	1.21951	3.03587	0.283937	1	1	1	NR0B2;
KitReceptor	1	54	1.21951	4.3849	0.206322	1	1	1	FGR;
TNF alpha/NF-kB	1	171	1.21951	1.38488	0.520009	1	1	1	PML;
TGFBR	1	125	1.21951	1.89448	0.414854	1	1	1	FZR1;
Epithelial-to-mesenchymal transition	2	185	2.43902	2.5475	0.186673	1	1	1	PLN; CCL2;

## Sheet: Protein domain
Analysis: Protein domain
Dataset name: Halter
Number of genes in the dataset: 82
Number of genes in the dataset (which are available in Protein domain database) :65
Number of genes in background: 19230
Is analysis quantitative: No
						Corrected p-values
Protein domain	No. of genes in the dataset	No.of genes in the background dataset	Percentage of genes	Fold enrichment	P-value (Hypergeometric test)	Bonferroni method	BH method	Q-value (Storey-Tibshirani method)
coiled coil region	15	2968	18.2927	1.18585	0.278112	1	1	1	ATPIF1; DNAJC8; FAM76A; MAP3K6; SLC9A1; KAZN; KIFC3; STIM2; CEP85L; ANKFN1; GGNBP2; MYH11; NDE1; TEKT5; SRPK1;
signal peptide	17	3668	20.7317	1.08739	0.393998	1	1	1	LOXL1; ATPIF1; IFI6; CD164L2; FCN3; GRHL3; CACNA2D1; CNTNAP2; TIMP2; PECAM1; CA4; TMEM132E; CCL1; CCL13; CCL2; CLPS; UPK3A;
transmembrane domain	17	4771	20.7317	0.836001	0.837667	1	1	1	PTAFR; STX12; IFI6; GPR3; CD164L2; TMEM222; SLC9A1; NIPAL3; CHIC2; PLN; PECAM1; CA4; TMEM132E; ALCAM; LHFPL5; UPK3A; WNT7B;
IG	2	340	2.43902	1.38617	0.426921	1	1	1	PECAM1; ALCAM;
TBC	1	50	1.21951	4.73562	0.192601	1	1	1	TBC1D21;
S_TKc	1	307	1.21951	0.771403	0.733524	1	1	1	MAP3K6;
AT_hook	1	28	1.21951	8.45514	0.112846	1	1	1	PDS5B;
RING	1	311	1.21951	0.761482	0.738114	1	1	1	PML;
SH3	1	216	1.21951	1.09638	0.604751	1	1	1	FGR;
IG_like	2	128	2.43902	3.68184	0.103607	1	1	1	PECAM1; ALCAM;
4.1m	1	14	1.21951	16.9043	0.0580907	1	1	1	CNTNAP2;
ANK	1	249	1.21951	0.951081	0.657329	1	1	1	ANKFN1;
FN3	1	187	1.21951	1.2664	0.552018	1	1	1	ANKFN1;
HOLI	1	48	1.21951	4.9329	0.185654	1	1	1	NR0B2;
WD40	3	269	3.65854	2.62368	0.10759	1	1	1	WDTC1; BCAS3; FZR1;
EGF	1	208	1.21951	1.13854	0.59085	1	1	1	CNTNAP2;
EGF_like	1	87	1.21951	2.72185	0.311067	1	1	1	CNTNAP2;
VWA	1	84	1.21951	2.81905	0.302139	1	1	1	CACNA2D1;
FA58C	1	20	1.21951	11.8355	0.0819543	1	1	1	CNTNAP2;
IQ	1	84	1.21951	2.81905	0.302139	1	1	1	MYH11;
RasGAP	1	15	1.21951	15.7781	0.0621101	1	1	1	NF1;
HOX	2	234	2.43902	2.01407	0.263416	1	1	1	EMX2; LHX1;
PH	1	278	1.21951	0.851871	0.69779	1	1	1	PLEKHM2;
BBOX	1	72	1.21951	3.28883	0.265266	1	1	1	PML;
C2	1	138	1.21951	1.71602	0.446686	1	1	1	SYTL1;
LIM	1	73	1.21951	3.24378	0.268411	1	1	1	LHX1;
SEC14	1	26	1.21951	9.10529	0.10522	1	1	1	NF1;
DnaJ	1	50	1.21951	4.73562	0.192601	1	1	1	DNAJC8;
SH2	1	111	1.21951	2.1334	0.37855	1	1	1	FGR;
TyrKc	1	88	1.21951	2.69093	0.314018	1	1	1	FGR;
PTPc	1	37	1.21951	6.39904	0.146372	1	1	1	PTPN18;
CHROMO	1	34	1.21951	6.9635	0.135338	1	1	1	CBX1;
SAM	2	92	2.43902	5.1224	0.0587659	1	1	1	KAZN; STIM2;
PX	1	45	1.21951	5.26169	0.175121	1	1	1	SNX11;
WH2	1	14	1.21951	16.9043	0.0580907	1	1	1	WASF2;
WNT1	1	19	1.21951	12.4581	0.0780189	1	1	1	WNT7B;
RUN	1	18	1.21951	13.1498	0.0740669	1	1	1	PLEKHM2;
MYSc	1	38	1.21951	6.23069	0.150019	1	1	1	MYH11;
PP2Cc	1	20	1.21951	11.8355	0.0819543	1	1	1	PPM1D;
Carb_anhydrase	1	17	1.21951	13.9229	0.0700981	1	1	1	CA4;
SCY	3	44	3.65854	16.0372	0.0008725	0.846325	0.846325	1	CCL1; CCL13; CCL2;
PHB	1	11	1.21951	21.5103	0.0459302	1	1	1	STOML1;
DWA	1	12	1.21951	19.7193	0.0500008	1	1	1	NFIC;
G_patch	1	23	1.21951	10.2924	0.0936611	1	1	1	GPATCH3;
RPEL	1	7	1.21951	33.7844	0.0294746	1	1	1	PHACTR4;
LamG	1	44	1.21951	5.38124	0.171581	1	1	1	CNTNAP2;
t_SNARE	1	22	1.21951	10.76	0.0897753	1	1	1	STX12;
KISc	1	44	1.21951	5.38124	0.171581	1	1	1	KIFC3;
cwf21	1	2	1.21951	117.825	0.00851038	1	1	1	SRRM3;
DUF1693	1	4	1.21951	59.0595	0.0169492	1	1	1	FAM46B;
SynN	1	10	1.21951	23.6592	0.0418423	1	1	1	STX12;
FBG	1	29	1.21951	8.16369	0.116634	1	1	1	FCN3;
NTR	1	4	1.21951	59.0595	0.0169492	1	1	1	TIMP2;
COLIPASE	1	1	1.21951	234.484	0.00426417	1	1	1	CLPS;
ChSh	1	3	1.21951	78.6806	0.0127387	1	1	1	CBX1;

## Sheet: Site of expression
Analysis: Site of expression
Dataset name: Halter
Number of genes in the dataset: 82
Number of genes in the dataset (which are available in Site of expression database) :81
Number of genes in background: 19230
Is analysis quantitative: No
						Corrected p-values
Site of expression	No. of genes in the dataset	No.of genes in the background dataset	Percentage of genes	Fold enrichment	P-value (Hypergeometric test)	Bonferroni method	BH method	Q-value (Storey-Tibshirani method)
T cells	11	1726	13.4146	1.49574	0.115292	1	0.913716	1	PML; RCC1; ATPIF1; DNAJC8; RPA2; WASF2; CCL1; CCL13; PDS5B; ALCAM; MTHFD1L;
Monocyte	9	2842	10.9756	0.743382	0.873312	1	1	1	RCC1; RPA2; WASF2; FCN3; TIMP2; CBX1; NF1; PDS5B; ALCAM;
MDA468	4	760	4.87805	1.23719	0.407702	1	1	1	DNAJC8; NUDC; TIMP2; ALCAM;
Small intestine	52	8360	63.4146	1.45879	0.000212056	0.179823	0.013651	0.0671312	PML; STOML1; RCC1; PHACTR4; MED18; SESN2; ATPIF1; DNAJC8; PTAFR; RPA2; THEMIS2; IFI6; FGR; WASF2; GPR3; WDTC1; SLC9A1; KDF1; NUDC; GPATCH3; GPN2; STPG1; KAZN; KIFC3; CACNA2D1; CNTNAP2; CEP85L; PLN; TIMP2; CDC42EP4; PECAM1; CBX1; ANKFN1; BCAS3; PPM1D; CA4; GGNBP2; LHX1; AATF; CCL13; CCL2; NF1; SRRM3; MYH11; NDE1; PTPN18; ALCAM; ARMC12; SRPK1; FAM118A; WNT7B; MTHFD1L;
Breast cancer	43	7467	52.439	1.35063	0.00836515	1	0.127269	0.625865	PML; RCC1; PHACTR4; MED18; SESN2; ATPIF1; DNAJC8; PTAFR; RPA2; THEMIS2; IFI6; FGR; WASF2; GPR3; WDTC1; KDF1; NUDC; STPG1; CHIC2; CEP85L; TIMP2; CDC42EP4; CBX1; ANKFN1; PPM1D; CA4; GGNBP2; LHX1; AATF; CCL2; NF1; SRRM3; MYH11; NDE1; PTPN18; ALCAM; ARMC12; SRPK1; UPK3A; FAM118A; WNT7B; MTHFD1L; NFIC;
Thyroid cancer	48	7281	58.5366	1.54615	0.000113762	0.0964704	0.0120588	0.0593012	PML; RCC1; PHACTR4; MED18; SESN2; ATPIF1; DNAJC8; PTAFR; RPA2; THEMIS2; IFI6; FGR; WASF2; GPR3; WDTC1; SLC9A1; KDF1; NUDC; GPATCH3; KIFC3; CHIC2; CACNA2D1; CNTNAP2; CEP85L; PLN; TIMP2; CDC42EP4; CBX1; ANKFN1; PPM1D; CA4; GGNBP2; LHX1; AATF; CCL2; NF1; SRRM3; MYH11; NDE1; PTPN18; ALCAM; ARMC12; CLPS; SRPK1; FAM118A; WNT7B; MTHFD1L; NFIC;
Colon	55	8429	67.0732	1.5303	1.78637e-05	0.0151484	0.011426	0.0561895	PML; STOML1; RCC1; PHACTR4; MED18; SESN2; ATPIF1; DNAJC8; PTAFR; RPA2; THEMIS2; IFI6; FGR; WASF2; GPR3; SYTL1; WDTC1; SLC9A1; KDF1; NUDC; GPATCH3; GPN2; STPG1; GRHL3; KAZN; KIFC3; CHIC2; CACNA2D1; CNTNAP2; CEP85L; PLN; TIMP2; CDC42EP4; CBX1; ANKFN1; BCAS3; PPM1D; CA4; GGNBP2; LHX1; AATF; CCL13; CCL2; NF1; SRRM3; MYH11; NDE1; PTPN18; ALCAM; ARMC12; SRPK1; WNT7B; MTHFD1L; NFIC; FZR1;
Parathyroid gland	40	5997	48.7805	1.5644	0.00063892	0.541804	0.0190977	0.0939163	PML; RCC1; MED18; SESN2; ATPIF1; DNAJC8; RPA2; THEMIS2; IFI6; FGR; WASF2; GPR3; WDTC1; SLC9A1; KDF1; NUDC; CHIC2; CNTNAP2; CEP85L; PLN; CDC42EP4; CBX1; ANKFN1; PPM1D; GGNBP2; LHX1; AATF; CCL2; SRRM3; MYH11; NDE1; PTPN18; ALCAM; ARMC12; SRPK1; UPK3A; FAM118A; WNT7B; MTHFD1L; NFIC;
Cervix, uterine	38	6391	46.3415	1.39457	0.00914005	1	0.131369	0.646029	PML; RCC1; PHACTR4; MED18; SESN2; ATPIF1; DNAJC8; PTAFR; RPA2; THEMIS2; IFI6; FGR; WASF2; GPR3; WDTC1; KDF1; NUDC; GPATCH3; STPG1; CHIC2; CEP85L; TIMP2; CDC42EP4; CBX1; PPM1D; GGNBP2; LHX1; AATF; CCL2; NF1; SRRM3; NDE1; PTPN18; ALCAM; SRPK1; WNT7B; MTHFD1L; NFIC;
Spleen	44	7887	53.6585	1.30843	0.0137854	1	0.182657	0.898248	PML; STOML1; RCC1; SESN2; ATPIF1; DNAJC8; PTAFR; RPA2; THEMIS2; IFI6; FGR; WASF2; GPR3; MAP3K6; WDTC1; KDF1; NUDC; NR0B2; PLEKHM2; KAZN; KIFC3; CHIC2; STIM2; CEP85L; TIMP2; PECAM1; CBX1; BCAS3; PPM1D; CA4; LHX1; AATF; CCL2; NF1; SRRM3; MYH11; NDE1; PTPN18; SRPK1; FAM118A; WNT7B; MTHFD1L; NFIC; FZR1;
HUVEC	63	13061	76.8293	1.13122	0.0503982	1	0.502796	1	PML; STOML1; TBC1D21; RCC1; PHACTR4; SESN2; DNAJC8; PTAFR; EYA3; THEMIS2; FGR; WASF2; GPR3; FCN3; MAP3K6; SYTL1; WDTC1; SLC9A1; KDF1; NUDC; NR0B2; GPATCH3; GPN2; NIPAL3; GRHL3; PLEKHM2; KAZN; KIFC3; GINS3; CHIC2; STIM2; CACNA2D1; CNTNAP2; CEP85L; PLN; PECAM1; CBX1; SNX11; ANKFN1; BCAS3; PPM1D; APPBP2; CA4; GGNBP2; LHX1; AATF; TMEM132E; CCL2; NF1; SRRM3; MYH11; NDE1; TEKT5; PDS5B; PTPN18; ARMC12; …
Tonsils	47	7274	57.3171	1.51541	0.000259101	0.219717	0.013651	0.0671312	PML; RCC1; PHACTR4; MED18; SESN2; ATPIF1; DNAJC8; PTAFR; RPA2; THEMIS2; IFI6; FGR; WASF2; GPR3; WDTC1; KDF1; NUDC; STPG1; GRHL3; KIFC3; CHIC2; CACNA2D1; CEP85L; TIMP2; CDC42EP4; PECAM1; CBX1; ANKFN1; PPM1D; CA4; GGNBP2; LHX1; AATF; CCL2; NF1; SRRM3; MYH11; NDE1; PTPN18; ALCAM; ARMC12; SRPK1; UPK3A; FAM118A; WNT7B; MTHFD1L; NFIC;
Jurkat A3	21	4200	25.6098	1.17297	0.239885	1	1	1	RCC1; PHACTR4; MED18; EYA3; RPA2; TMEM222; NUDC; GPN2; PLEKHM2; GINS3; CHIC2; TIMP2; CBX1; AATF; NF1; NDE1; PDS5B; PTPN18; SRPK1; FAM118A; MTHFD1L;
Rectum	48	7113	58.5366	1.58267	5.80528e-05	0.0492288	0.011426	0.0561895	PML; RCC1; PHACTR4; MED18; SESN2; ATPIF1; DNAJC8; PTAFR; RPA2; THEMIS2; IFI6; FGR; WASF2; GPR3; WDTC1; SLC9A1; KDF1; NUDC; GPATCH3; GPN2; STPG1; CHIC2; CACNA2D1; CEP85L; PLN; TIMP2; CDC42EP4; CBX1; ANKFN1; PPM1D; CA4; GGNBP2; LHX1; AATF; CCL2; NF1; SRRM3; MYH11; NDE1; PTPN18; ALCAM; ARMC12; SRPK1; UPK3A; FAM118A; WNT7B; MTHFD1L; NFIC;
Liver	59	11680	71.9512	1.18466	0.0226841	1	0.267169	1	PML; STOML1; LOXL1; RCC1; PHACTR4; MED18; SESN2; ATPIF1; DNAJC8; PTAFR; RPA2; THEMIS2; STX12; FAM76A; IFI6; FGR; WASF2; GPR3; FCN3; MAP3K6; WDTC1; KDF1; NUDC; NR0B2; GPATCH3; GPN2; STPG1; GRHL3; PLEKHM2; KAZN; KIFC3; CHIC2; STIM2; CACNA2D1; CEP85L; TIMP2; CDC42EP4; PECAM1; CBX1; ANKFN1; BCAS3; PPM1D; APPBP2; CA4; GGNBP2; AATF; CCL13; CCL2; NF1; SRRM3; MYH11; NDE1; PTPN18; ALCAM; SRPK1; UPK3A; WNT…
CD4	9	1901	10.9756	1.11136	0.422941	1	1	1	RCC1; ATPIF1; DNAJC8; RPA2; FCN3; NUDC; CBX1; PDS5B; PTPN18;
Skeletal muscles	50	9060	60.9756	1.29432	0.00796073	1	0.127269	0.625865	PML; STOML1; LOXL1; RCC1; PHACTR4; SESN2; ATPIF1; DNAJC8; PTAFR; RPA2; THEMIS2; FGR; WASF2; GPR3; SYTL1; WDTC1; KDF1; NUDC; GPATCH3; PLEKHM2; KAZN; CHIC2; STIM2; CACNA2D1; CEP85L; PLN; TIMP2; CDC42EP4; PECAM1; CBX1; ANKFN1; BCAS3; PPM1D; APPBP2; CA4; GGNBP2; LHX1; AATF; NF1; SRRM3; MYH11; NDE1; PTPN18; ALCAM; ARMC12; CLPS; SRPK1; FAM118A; MTHFD1L; NFIC;
H293	35	6792	42.6829	1.20867	0.10094	1	0.840784	1	PML; RCC1; PHACTR4; MED18; ATPIF1; DNAJC8; EYA3; RPA2; THEMIS2; STX12; WASF2; FCN3; MAP3K6; TMEM222; WDTC1; NUDC; GPATCH3; GPN2; PLEKHM2; STIM2; CACNA2D1; TIMP2; CDC42EP4; CBX1; BCAS3; GGNBP2; AATF; NF1; NDE1; PDS5B; PTPN18; ALCAM; SRPK1; MTHFD1L; NFIC;
Prostate	49	7923	59.7561	1.45046	0.00052391	0.444276	0.0182287	0.0896429	PML; STOML1; RCC1; PHACTR4; MED18; SESN2; ATPIF1; DNAJC8; PTAFR; RPA2; THEMIS2; IFI6; FGR; WASF2; GPR3; SYTL1; WDTC1; SLC9A1; KDF1; NUDC; GRHL3; KIFC3; CHIC2; CNTNAP2; CEP85L; PLN; TIMP2; CDC42EP4; CBX1; BCAS3; PPM1D; GGNBP2; LHX1; AATF; CCL13; CCL2; NF1; SRRM3; MYH11; NDE1; PTPN18; ALCAM; ARMC12; SRPK1; UPK3A; FAM118A; WNT7B; MTHFD1L; NFIC;
Jurkat	18	2869	21.9512	1.47195	0.0561927	1	0.554086	1	PML; ATPIF1; DNAJC8; STX12; FGR; SLC9A1; NUDC; NIPAL3; CBX1; LHX1; AATF; NF1; MYH11; PDS5B; PTPN18; ALCAM; SRPK1; MTHFD1L;
Bone marrow	40	7808	48.7805	1.20155	0.0817779	1	0.722372	1	PML; STOML1; RCC1; PHACTR4; SESN2; ATPIF1; DNAJC8; RPA2; THEMIS2; STX12; FGR; WASF2; GPR3; WDTC1; KDF1; NUDC; GPATCH3; CHIC2; CACNA2D1; CNTNAP2; CEP85L; TIMP2; CDC42EP4; PECAM1; CBX1; BCAS3; PPM1D; LHX1; CCL2; NF1; SRRM3; NDE1; PTPN18; ALCAM; SRPK1; UPK3A; FAM118A; WNT7B; MTHFD1L; NFIC;
Lateral ventricle	41	6620	50	1.45259	0.00258083	1	0.0516305	0.253902	PML; RCC1; PHACTR4; MED18; SESN2; ATPIF1; DNAJC8; PTAFR; RPA2; THEMIS2; IFI6; FGR; WASF2; GPR3; WDTC1; SLC9A1; KDF1; NUDC; STPG1; CNTNAP2; CEP85L; TIMP2; CDC42EP4; CBX1; ANKFN1; PPM1D; CA4; GGNBP2; LHX1; AATF; CCL2; NF1; SRRM3; NDE1; PTPN18; ALCAM; SRPK1; FAM118A; WNT7B; MTHFD1L; NFIC;
Colorectal cancer	48	7513	58.5366	1.49841	0.000273664	0.232067	0.013651	0.0671312	PML; RCC1; PHACTR4; MED18; SESN2; ATPIF1; DNAJC8; PTAFR; RPA2; THEMIS2; IFI6; FGR; WASF2; GPR3; WDTC1; KDF1; NUDC; GPATCH3; GPN2; STPG1; KIFC3; CHIC2; CACNA2D1; CEP85L; PLN; TIMP2; CDC42EP4; CBX1; ANKFN1; PPM1D; CA4; GGNBP2; LHX1; AATF; CCL2; NF1; SRRM3; MYH11; NDE1; PTPN18; ALCAM; ARMC12; SRPK1; UPK3A; FAM118A; WNT7B; MTHFD1L; NFIC;
Gall bladder	46	7295	56.0976	1.4789	0.000622627	0.527988	0.0190977	0.0939163	PML; RCC1; PHACTR4; MED18; SESN2; ATPIF1; DNAJC8; PTAFR; RPA2; THEMIS2; IFI6; FGR; WASF2; GPR3; WDTC1; SLC9A1; KDF1; NUDC; GPATCH3; GPN2; STPG1; KIFC3; CHIC2; CACNA2D1; CEP85L; PLN; TIMP2; CDC42EP4; CBX1; PPM1D; CA4; GGNBP2; LHX1; CCL2; NF1; SRRM3; MYH11; NDE1; PTPN18; ALCAM; ARMC12; SRPK1; UPK3A; WNT7B; MTHFD1L; NFIC;
Plasma	51	11971	62.1951	0.999165	0.553202	1	1	1	PML; STOML1; LOXL1; TBC1D21; SESN2; ATPIF1; DNAJC8; PTAFR; RPA2; THEMIS2; FAM76A; IFI6; FGR; WASF2; FCN3; MAP3K6; SYTL1; WDTC1; SLC9A1; KDF1; GPATCH3; NIPAL3; STPG1; PLEKHM2; GINS3; STIM2; CACNA2D1; CNTNAP2; TIMP2; CDC42EP4; PECAM1; CBX1; PPM1D; APPBP2; CA4; AATF; TMEM132E; CCL2; NF1; SRRM3; MYH11; PDS5B; PTPN18; ALCAM; CLPS; SRPK1; UPK3A; WNT7B; MTHFD1L; NFIC; FZR1;
Malignant carcinoid	43	7081	52.439	1.42425	0.00275285	1	0.0522326	0.256862	PML; RCC1; PHACTR4; MED18; SESN2; ATPIF1; DNAJC8; PTAFR; RPA2; THEMIS2; IFI6; FGR; WASF2; GPR3; WDTC1; KDF1; NUDC; GPN2; STPG1; CHIC2; CACNA2D1; CNTNAP2; CEP85L; TIMP2; CDC42EP4; CBX1; ANKFN1; PPM1D; GGNBP2; LHX1; AATF; CCL2; NF1; SRRM3; MYH11; NDE1; PTPN18; ALCAM; ARMC12; SRPK1; FAM118A; WNT7B; MTHFD1L;
Ascites cancer cell	18	3509	21.9512	1.20349	0.229295	1	1	1	PML; LOXL1; RCC1; ATPIF1; DNAJC8; RPA2; THEMIS2; STX12; FAM76A; WASF2; NUDC; CACNA2D1; TIMP2; CDC42EP4; CBX1; CA4; CCL2; PDS5B;
Endometrial cancer	48	7460	58.5366	1.50905	0.000225088	0.190874	0.013651	0.0671312	PML; RCC1; PHACTR4; SESN2; ATPIF1; DNAJC8; PTAFR; RPA2; THEMIS2; IFI6; FGR; WASF2; GPR3; WDTC1; SLC9A1; KDF1; NUDC; GPATCH3; STPG1; KIFC3; CHIC2; CACNA2D1; CNTNAP2; CEP85L; TIMP2; CDC42EP4; PECAM1; CBX1; ANKFN1; PPM1D; CA4; GGNBP2; LHX1; AATF; CCL2; NF1; SRRM3; MYH11; NDE1; PTPN18; ALCAM; ARMC12; SRPK1; UPK3A; FAM118A; WNT7B; MTHFD1L; NFIC;
Lung cancer	48	7435	58.5366	1.51413	0.000205054	0.173886	0.013651	0.0671312	PML; RCC1; PHACTR4; SESN2; ATPIF1; DNAJC8; PTAFR; RPA2; THEMIS2; IFI6; FGR; WASF2; GPR3; WDTC1; SLC9A1; KDF1; NUDC; GPATCH3; GPN2; STPG1; KIFC3; CHIC2; CEP85L; PLN; TIMP2; CDC42EP4; PECAM1; CBX1; ANKFN1; PPM1D; CA4; GGNBP2; LHX1; AATF; CCL2; NF1; SRRM3; MYH11; NDE1; PTPN18; ALCAM; ARMC12; SRPK1; UPK3A; FAM118A; WNT7B; MTHFD1L; NFIC;
HCT116	11	2651	13.4146	0.973842	0.587553	1	1	1	RCC1; ATPIF1; RPA2; FGR; NUDC; CBX1; AATF; MYH11; PDS5B; UPK3A; MTHFD1L;
PC3	8	1294	9.7561	1.45147	0.185762	1	1	1	LOXL1; RCC1; WASF2; NUDC; STIM2; TIMP2; CBX1; ALCAM;
MicroProt	4	440	4.87805	2.13695	0.118639	1	0.928226	1	LOXL1; FCN3; WDTC1; TIMP2;
Epididymis	41	7090	50	1.3563	0.0101126	1	0.142925	0.702859	PML; RCC1; PHACTR4; MED18; SESN2; ATPIF1; DNAJC8; PTAFR; RPA2; THEMIS2; IFI6; FGR; WASF2; GPR3; WDTC1; KDF1; NUDC; KIFC3; CHIC2; CACNA2D1; CEP85L; TIMP2; CDC42EP4; CBX1; ANKFN1; PPM1D; GGNBP2; LHX1; AATF; CCL2; NF1; NDE1; PTPN18; ALCAM; ARMC12; SRPK1; UPK3A; FAM118A; WNT7B; MTHFD1L; NFIC;
Cerebellum	46	7633	56.0976	1.41341	0.00189833	1	0.0435076	0.213956	PML; STOML1; RCC1; MED18; SESN2; ATPIF1; DNAJC8; PTAFR; RPA2; THEMIS2; IFI6; FGR; WASF2; GPR3; SYTL1; KDF1; NUDC; GPATCH3; STPG1; KAZN; STIM2; CNTNAP2; CEP85L; CDC42EP4; CBX1; ANKFN1; PPM1D; CA4; GGNBP2; LHX1; AATF; CCL2; NF1; SRRM3; NDE1; PDS5B; PTPN18; ALCAM; ARMC12; CLPS; SRPK1; UPK3A; FAM118A; WNT7B; MTHFD1L; NFIC;
Nasopharynx	44	6904	53.6585	1.49473	0.000746422	0.632966	0.0204183	0.10041	PML; RCC1; PHACTR4; MED18; SESN2; ATPIF1; DNAJC8; PTAFR; RPA2; THEMIS2; IFI6; FGR; WASF2; GPR3; WDTC1; KDF1; NUDC; GPATCH3; STPG1; CHIC2; CACNA2D1; CEP85L; PLN; TIMP2; CDC42EP4; CBX1; ANKFN1; PPM1D; CA4; GGNBP2; AATF; CCL2; NF1; SRRM3; MYH11; NDE1; PTPN18; ALCAM; ARMC12; SRPK1; FAM118A; WNT7B; MTHFD1L; NFIC;
global_SCX_fractionated	10	2476	12.1951	0.94797	0.622748	1	1	1	RCC1; DNAJC8; EYA3; RPA2; SYTL1; SLC9A1; NUDC; CBX1; ALCAM; SRPK1;
Hippocampus	47	7355	57.3171	1.49872	0.000348607	0.295619	0.0155589	0.0765135	PML; STOML1; RCC1; PHACTR4; MED18; SESN2; ATPIF1; DNAJC8; PTAFR; RPA2; THEMIS2; IFI6; FGR; WASF2; GPR3; SYTL1; WDTC1; KDF1; NUDC; STPG1; KAZN; STIM2; CACNA2D1; CNTNAP2; CEP85L; TIMP2; CDC42EP4; CBX1; ANKFN1; PPM1D; CA4; GGNBP2; LHX1; AATF; CCL2; NF1; SRRM3; MYH11; NDE1; PDS5B; PTPN18; ALCAM; SRPK1; FAM118A; WNT7B; MTHFD1L; NFIC;
HeLa	28	5789	34.1463	1.13454	0.245927	1	1	1	PML; LOXL1; RCC1; ATPIF1; DNAJC8; RPA2; THEMIS2; FGR; WASF2; MAP3K6; SYTL1; NUDC; KIFC3; GINS3; CACNA2D1; CNTNAP2; CEP85L; CBX1; BCAS3; AATF; NF1; MYH11; PDS5B; PTPN18; SRPK1; MTHFD1L; NFIC; FZR1;
Malignant lymphoma	39	6586	47.561	1.38888	0.00855461	1	0.127269	0.625865	PML; RCC1; MED18; SESN2; ATPIF1; DNAJC8; RPA2; THEMIS2; FGR; WASF2; GPR3; WDTC1; KDF1; NUDC; CHIC2; CACNA2D1; CEP85L; TIMP2; CDC42EP4; PECAM1; CBX1; ANKFN1; PPM1D; CA4; LHX1; AATF; CCL2; NF1; SRRM3; MYH11; NDE1; PTPN18; ALCAM; SRPK1; UPK3A; FAM118A; WNT7B; MTHFD1L; NFIC;
Prostate cancer	44	7214	53.6585	1.4305	0.00208444	1	0.0461847	0.227121	PML; RCC1; PHACTR4; SESN2; ATPIF1; DNAJC8; PTAFR; RPA2; THEMIS2; IFI6; FGR; WASF2; GPR3; WDTC1; KDF1; NUDC; GPATCH3; STPG1; KIFC3; CHIC2; CNTNAP2; CEP85L; TIMP2; CDC42EP4; CBX1; ANKFN1; PPM1D; CA4; GGNBP2; LHX1; AATF; CCL2; NF1; SRRM3; MYH11; NDE1; PTPN18; ALCAM; SRPK1; UPK3A; FAM118A; WNT7B; MTHFD1L; NFIC;
Skin	39	7292	47.561	1.25442	0.0468706	1	0.47317	1	PML; RCC1; PHACTR4; SESN2; DNAJC8; PTAFR; RPA2; THEMIS2; IFI6; FGR; WASF2; GPR3; WDTC1; KDF1; NUDC; GPATCH3; STPG1; CACNA2D1; CEP85L; PLN; TIMP2; CDC42EP4; CBX1; PPM1D; CA4; GGNBP2; LHX1; AATF; CCL2; NF1; MYH11; NDE1; PTPN18; ALCAM; ARMC12; SRPK1; WNT7B; MTHFD1L; NFIC;
Placenta	61	10894	74.3902	1.31319	0.000653106	0.553834	0.0190977	0.0939163	PML; STOML1; LOXL1; RCC1; PHACTR4; MED18; SESN2; ATPIF1; DNAJC8; PTAFR; RPA2; THEMIS2; STX12; IFI6; FGR; WASF2; GPR3; TMEM222; WDTC1; SLC9A1; KDF1; NUDC; GPATCH3; GRHL3; PLEKHM2; KAZN; KIFC3; CHIC2; STIM2; CACNA2D1; CEP85L; TIMP2; CDC42EP4; PECAM1; CBX1; SNX11; ANKFN1; BCAS3; PPM1D; APPBP2; CA4; GGNBP2; LHX1; AATF; CCL13; CCL2; NF1; SRRM3; MYH11; NDE1; PDS5B; PTPN18; ALCAM; ARMC12; CLPS; SRPK1; U…
Lung	58	9992	70.7317	1.36133	0.000405861	0.34417	0.0159593	0.0784828	PML; STOML1; LOXL1; RCC1; PHACTR4; MED18; SESN2; ATPIF1; DNAJC8; PTAFR; RPA2; THEMIS2; IFI6; FGR; WASF2; GPR3; FCN3; MAP3K6; WDTC1; KDF1; NUDC; GPATCH3; PLEKHM2; KAZN; KIFC3; CHIC2; STIM2; CACNA2D1; CNTNAP2; CEP85L; PLN; TIMP2; CDC42EP4; PECAM1; CBX1; ANKFN1; BCAS3; PPM1D; APPBP2; CA4; GGNBP2; LHX1; AATF; CCL13; CCL2; NF1; SRRM3; MYH11; NDE1; PTPN18; ALCAM; ARMC12; SRPK1; FAM118A; WNT7B; MTHFD1L;…
Cerebral cortex	43	7099	52.439	1.42064	0.00290923	1	0.0536311	0.26374	PML; STOML1; RCC1; PHACTR4; MED18; SESN2; ATPIF1; DNAJC8; PTAFR; RPA2; THEMIS2; IFI6; FGR; WASF2; GPR3; SYTL1; WDTC1; KDF1; NUDC; STPG1; CACNA2D1; CNTNAP2; CEP85L; TIMP2; CDC42EP4; CBX1; ANKFN1; PPM1D; CA4; GGNBP2; LHX1; AATF; CCL2; NF1; SRRM3; MYH11; NDE1; PTPN18; SRPK1; FAM118A; WNT7B; MTHFD1L; NFIC;
Ovarian cancer	50	7644	60.9756	1.53408	8.08446e-05	0.0685562	0.011426	0.0561895	PML; RCC1; PHACTR4; MED18; SESN2; ATPIF1; DNAJC8; PTAFR; RPA2; THEMIS2; IFI6; FGR; WASF2; GPR3; WDTC1; SLC9A1; KDF1; NUDC; GPATCH3; GPN2; STPG1; KIFC3; CHIC2; CACNA2D1; CNTNAP2; CEP85L; PLN; TIMP2; CDC42EP4; CBX1; ANKFN1; PPM1D; CA4; GGNBP2; LHX1; AATF; CCL2; NF1; SRRM3; MYH11; NDE1; PTPN18; ALCAM; ARMC12; SRPK1; UPK3A; FAM118A; WNT7B; MTHFD1L; NFIC;
Kidney	61	10256	74.3902	1.39487	7.05852e-05	0.0598563	0.011426	0.0561895	EMX2; PML; STOML1; LOXL1; RCC1; PHACTR4; MED18; SESN2; ATPIF1; DNAJC8; PTAFR; RPA2; THEMIS2; IFI6; FGR; WASF2; GPR3; MAP3K6; WDTC1; SLC9A1; KDF1; NUDC; NR0B2; STPG1; GRHL3; PLEKHM2; KAZN; KIFC3; CHIC2; STIM2; CEP85L; PLN; TIMP2; CDC42EP4; PECAM1; CBX1; ANKFN1; BCAS3; PPM1D; APPBP2; CA4; GGNBP2; LHX1; AATF; CCL13; CCL2; NF1; SRRM3; MYH11; NDE1; PTPN18; ALCAM; ARMC12; CLPS; SRPK1; UPK3A; FAM118A; W…
H1688	7	1007	8.53659	1.63229	0.137528	1	1	1	RCC1; DNAJC8; RPA2; NUDC; TIMP2; CBX1; ALCAM;
Sy5y	13	2490	15.8537	1.22515	0.259392	1	1	1	DNAJC8; EYA3; RPA2; STX12; FAM76A; WASF2; NUDC; CACNA2D1; CDC42EP4; CBX1; NDE1; ALCAM; NFIC;
Duodenum	45	7275	54.878	1.45074	0.00123785	1	0.0308733	0.151825	PML; RCC1; PHACTR4; MED18; SESN2; ATPIF1; DNAJC8; PTAFR; RPA2; THEMIS2; IFI6; FGR; WASF2; GPR3; WDTC1; SLC9A1; KDF1; NUDC; GPATCH3; GPN2; STPG1; KIFC3; CACNA2D1; CEP85L; TIMP2; CDC42EP4; CBX1; ANKFN1; PPM1D; CA4; GGNBP2; LHX1; AATF; CCL2; NF1; SRRM3; MYH11; NDE1; PTPN18; ALCAM; ARMC12; SRPK1; WNT7B; MTHFD1L; NFIC;
Bronchus	41	6923	50	1.38902	0.00639534	1	0.104293	0.512879	PML; RCC1; PHACTR4; MED18; SESN2; ATPIF1; DNAJC8; PTAFR; RPA2; THEMIS2; IFI6; FGR; WASF2; WDTC1; KDF1; NUDC; GPATCH3; CHIC2; CEP85L; TIMP2; CDC42EP4; CBX1; ANKFN1; PPM1D; CA4; GGNBP2; LHX1; AATF; CCL2; NF1; SRRM3; MYH11; NDE1; ALCAM; ARMC12; SRPK1; UPK3A; FAM118A; WNT7B; MTHFD1L; NFIC;
Brain	40	7290	48.7805	1.28692	0.0286657	1	0.324113	1	EMX2; STOML1; LOXL1; SESN2; ATPIF1; DNAJC8; PTAFR; RPA2; STX12; FGR; WASF2; GPR3; SYTL1; WDTC1; NUDC; GRHL3; PLEKHM2; KAZN; KIFC3; STIM2; CACNA2D1; CNTNAP2; TIMP2; CDC42EP4; CBX1; BCAS3; APPBP2; CA4; GGNBP2; LHX1; AATF; NF1; MYH11; PDS5B; PTPN18; ALCAM; SRPK1; WNT7B; MTHFD1L; FZR1;
Stomach	52	8044	63.4146	1.5161	6.43241e-05	0.0545468	0.011426	0.0561895	PML; STOML1; RCC1; PHACTR4; MED18; SESN2; ATPIF1; DNAJC8; PTAFR; RPA2; THEMIS2; IFI6; FGR; WASF2; GPR3; SYTL1; WDTC1; SLC9A1; KDF1; NUDC; GPATCH3; GPN2; STPG1; KIFC3; CHIC2; CACNA2D1; CNTNAP2; CEP85L; PLN; TIMP2; CDC42EP4; CBX1; ANKFN1; BCAS3; PPM1D; CA4; GGNBP2; LHX1; AATF; CCL2; NF1; SRRM3; MYH11; NDE1; PTPN18; ALCAM; ARMC12; CLPS; SRPK1; WNT7B; MTHFD1L; NFIC;
Pancreas	55	9936	67.0732	1.2982	0.00334407	1	0.0603355	0.29671	PML; STOML1; LOXL1; RCC1; MED18; SESN2; ATPIF1; DNAJC8; RPA2; THEMIS2; IFI6; FGR; WASF2; GPR3; SYTL1; WDTC1; KDF1; NUDC; NR0B2; STPG1; GRHL3; PLEKHM2; KAZN; KIFC3; CHIC2; STIM2; CACNA2D1; CEP85L; PLN; TIMP2; CDC42EP4; CBX1; ANKFN1; PPM1D; APPBP2; CA4; GGNBP2; LHX1; AATF; CCL13; CCL2; NF1; SRRM3; MYH11; NDE1; PDS5B; PTPN18; ALCAM; CLPS; SRPK1; FAM118A; WNT7B; MTHFD1L; NFIC; FZR1;
Lymph nodes	42	6700	51.2195	1.47025	0.00165109	1	0.0388922	0.191259	PML; STOML1; RCC1; SESN2; ATPIF1; DNAJC8; PTAFR; RPA2; THEMIS2; IFI6; FGR; WASF2; GPR3; WDTC1; KDF1; NUDC; STPG1; GRHL3; KIFC3; CEP85L; TIMP2; CDC42EP4; PECAM1; CBX1; ANKFN1; PPM1D; CA4; GGNBP2; LHX1; AATF; CCL2; NF1; SRRM3; MYH11; NDE1; PTPN18; ALCAM; SRPK1; FAM118A; WNT7B; MTHFD1L; NFIC;
H358	10	1489	12.1951	1.57634	0.100917	1	0.840784	1	ATPIF1; DNAJC8; SYTL1; SLC9A1; STIM2; TIMP2; CBX1; MYH11; PDS5B; ALCAM;
Fallopian tubes	39	6677	47.561	1.36996	0.0109619	1	0.152388	0.749395	PML; RCC1; PHACTR4; MED18; SESN2; ATPIF1; DNAJC8; PTAFR; RPA2; THEMIS2; IFI6; FGR; WASF2; GPR3; WDTC1; KDF1; NUDC; GPATCH3; CEP85L; TIMP2; CDC42EP4; CBX1; ANKFN1; GGNBP2; LHX1; AATF; CCL2; NF1; SRRM3; MYH11; NDE1; PTPN18; ALCAM; SRPK1; UPK3A; FAM118A; WNT7B; MTHFD1L; NFIC;
Head & neck cancer	46	7062	56.0976	1.52769	0.000268972	0.228089	0.013651	0.0671312	PML; RCC1; PHACTR4; MED18; SESN2; ATPIF1; DNAJC8; RPA2; THEMIS2; IFI6; FGR; WASF2; GPR3; WDTC1; SLC9A1; KDF1; NUDC; GPATCH3; KIFC3; CHIC2; CACNA2D1; CEP85L; TIMP2; CDC42EP4; PECAM1; CBX1; ANKFN1; PPM1D; CA4; GGNBP2; LHX1; AATF; CCL2; NF1; SRRM3; MYH11; NDE1; PTPN18; ALCAM; ARMC12; SRPK1; UPK3A; FAM118A; WNT7B; MTHFD1L; NFIC;
Pancreatic cancer	51	8316	62.1951	1.43831	0.000414039	0.351105	0.0159593	0.0784828	PML; RCC1; PHACTR4; MED18; SESN2; ATPIF1; DNAJC8; PTAFR; RPA2; THEMIS2; IFI6; FGR; WASF2; GPR3; WDTC1; SLC9A1; KDF1; NUDC; GPATCH3; GPN2; STPG1; KIFC3; CHIC2; CACNA2D1; CEP85L; TIMP2; CDC42EP4; PECAM1; CBX1; ANKFN1; PPM1D; CA4; GGNBP2; LHX1; AATF; CCL2; NF1; SRRM3; MYH11; NDE1; PDS5B; PTPN18; ALCAM; ARMC12; CLPS; SRPK1; UPK3A; FAM118A; WNT7B; MTHFD1L; NFIC;
BT474	3	558	3.65854	1.26484	0.426559	1	1	1	RCC1; DNAJC8; ALCAM;
Seminal vesicle	41	6620	50	1.45259	0.00258083	1	0.0516305	0.253902	PML; RCC1; PHACTR4; MED18; SESN2; ATPIF1; DNAJC8; PTAFR; RPA2; THEMIS2; IFI6; FGR; WASF2; GPR3; WDTC1; SLC9A1; KDF1; NUDC; CHIC2; CACNA2D1; CEP85L; TIMP2; CDC42EP4; CBX1; ANKFN1; PPM1D; CA4; GGNBP2; AATF; CCL2; NF1; SRRM3; MYH11; NDE1; PTPN18; ALCAM; SRPK1; FAM118A; WNT7B; MTHFD1L; NFIC;
Urinary bladder	47	7054	57.3171	1.56267	0.000111576	0.0946161	0.0120588	0.0593012	PML; STOML1; RCC1; PHACTR4; MED18; SESN2; ATPIF1; DNAJC8; PTAFR; RPA2; THEMIS2; IFI6; FGR; WASF2; GPR3; WDTC1; SLC9A1; KDF1; NUDC; GPATCH3; GPN2; KAZN; CHIC2; CEP85L; PLN; TIMP2; CDC42EP4; CBX1; PPM1D; CA4; GGNBP2; LHX1; AATF; CCL2; NF1; SRRM3; MYH11; NDE1; PTPN18; ALCAM; ARMC12; SRPK1; UPK3A; FAM118A; WNT7B; MTHFD1L; NFIC;
K-562	16	2513	19.5122	1.49386	0.0636855	1	0.620751	1	RCC1; DNAJC8; EYA3; RPA2; THEMIS2; WASF2; MAP3K6; NUDC; BCAS3; NF1; PDS5B; PTPN18; SRPK1; FAM118A; MTHFD1L; FZR1;
Salivary glands	40	6607	48.7805	1.41996	0.00484518	1	0.0838512	0.412353	PML; STOML1; RCC1; PHACTR4; SESN2; DNAJC8; PTAFR; RPA2; THEMIS2; IFI6; FGR; WASF2; GPR3; WDTC1; SLC9A1; KDF1; NUDC; GPATCH3; GPN2; CHIC2; CEP85L; TIMP2; CDC42EP4; CBX1; ANKFN1; PPM1D; CA4; LHX1; AATF; CCL2; NF1; SRRM3; NDE1; PTPN18; ALCAM; SRPK1; UPK3A; WNT7B; MTHFD1L; NFIC;
Testis	57	10269	69.5122	1.30177	0.00212406	1	0.0461847	0.227121	PML; STOML1; RCC1; PHACTR4; MED18; SESN2; ATPIF1; DNAJC8; PTAFR; RPA2; THEMIS2; STX12; IFI6; FGR; WASF2; GPR3; MAP3K6; SYTL1; WDTC1; KDF1; NUDC; GPATCH3; GPN2; GRHL3; PLEKHM2; KAZN; KIFC3; CHIC2; STIM2; CACNA2D1; CEP85L; TIMP2; CDC42EP4; CBX1; ANKFN1; BCAS3; PPM1D; APPBP2; CA4; GGNBP2; LHX1; AATF; CCL13; CCL2; NF1; SRRM3; MYH11; NDE1; PTPN18; ALCAM; ARMC12; CLPS; SRPK1; FAM118A; WNT7B; MTHFD1L; N…
MDA231	3	336	3.65854	2.10052	0.172928	1	1	1	NUDC; TIMP2; ALCAM;
Urothelial cancer	46	7521	56.0976	1.43446	0.0013293	1	0.032207	0.158383	PML; RCC1; PHACTR4; MED18; SESN2; ATPIF1; DNAJC8; PTAFR; RPA2; THEMIS2; IFI6; FGR; WASF2; GPR3; WDTC1; SLC9A1; KDF1; NUDC; GPATCH3; GPN2; KIFC3; CHIC2; CEP85L; TIMP2; CDC42EP4; CBX1; ANKFN1; PPM1D; CA4; GGNBP2; LHX1; AATF; CCL2; NF1; SRRM3; MYH11; NDE1; PTPN18; ALCAM; ARMC12; SRPK1; UPK3A; FAM118A; WNT7B; MTHFD1L; NFIC;
R	11	1948	13.4146	1.32528	0.205321	1	1	1	RCC1; MED18; DNAJC8; EYA3; RPA2; NUDC; CDC42EP4; CBX1; PDS5B; SRPK1; MTHFD1L;
Soft tissue	44	6969	53.6585	1.48079	0.000933882	0.791932	0.0247479	0.121702	PML; RCC1; PHACTR4; MED18; SESN2; ATPIF1; DNAJC8; PTAFR; RPA2; THEMIS2; IFI6; FGR; WASF2; GPR3; WDTC1; KDF1; NUDC; GPATCH3; CHIC2; CACNA2D1; CEP85L; PLN; TIMP2; CDC42EP4; CBX1; ANKFN1; PPM1D; CA4; LHX1; AATF; CCL2; NF1; SRRM3; MYH11; NDE1; PTPN18; ARMC12; CLPS; SRPK1; UPK3A; FAM118A; WNT7B; MTHFD1L; NFIC;
Testis cancer	44	7248	53.6585	1.42379	0.00231834	1	0.0491488	0.241697	PML; RCC1; PHACTR4; MED18; SESN2; ATPIF1; DNAJC8; RPA2; THEMIS2; IFI6; FGR; WASF2; GPR3; WDTC1; KDF1; NUDC; GPN2; STPG1; KIFC3; CHIC2; CACNA2D1; CEP85L; TIMP2; CDC42EP4; CBX1; ANKFN1; PPM1D; CA4; GGNBP2; LHX1; AATF; CCL2; NF1; SRRM3; NDE1; PTPN18; ALCAM; ARMC12; CLPS; SRPK1; FAM118A; WNT7B; MTHFD1L; NFIC;
Neutrophil	11	2031	13.4146	1.27112	0.245427	1	1	1	PML; RCC1; RPA2; FCN3; CACNA2D1; CDC42EP4; CBX1; CA4; ALCAM; SRPK1; NFIC;
CD8	18	3327	21.9512	1.26932	0.165399	1	1	1	PML; RCC1; ATPIF1; DNAJC8; EYA3; RPA2; THEMIS2; WASF2; FCN3; SLC9A1; NUDC; CBX1; BCAS3; PDS5B; ALCAM; SRPK1; FAM118A; MTHFD1L;
Stomach cancer	48	7399	58.5366	1.5215	0.000179085	0.151864	0.013651	0.0671312	PML; RCC1; PHACTR4; MED18; SESN2; ATPIF1; DNAJC8; PTAFR; RPA2; THEMIS2; IFI6; FGR; WASF2; GPR3; WDTC1; SLC9A1; KDF1; NUDC; GPATCH3; GPN2; STPG1; KIFC3; CHIC2; CACNA2D1; CNTNAP2; CEP85L; TIMP2; CDC42EP4; PECAM1; CBX1; ANKFN1; PPM1D; CA4; GGNBP2; LHX1; AATF; CCL2; NF1; SRRM3; NDE1; PTPN18; ALCAM; ARMC12; SRPK1; FAM118A; WNT7B; MTHFD1L; NFIC;
Skin cancer	44	7029	53.6585	1.46815	0.00114368	0.969842	0.0293892	0.144526	PML; RCC1; PHACTR4; MED18; SESN2; ATPIF1; DNAJC8; PTAFR; RPA2; IFI6; FGR; WASF2; GPR3; WDTC1; SLC9A1; KDF1; NUDC; GPATCH3; CHIC2; CEP85L; PLN; TIMP2; CDC42EP4; CBX1; ANKFN1; PPM1D; CA4; GGNBP2; LHX1; AATF; CCL2; NF1; SRRM3; NDE1; PTPN18; ALCAM; ARMC12; CLPS; SRPK1; UPK3A; FAM118A; WNT7B; MTHFD1L; NFIC;
Adrenal glands	48	7554	58.5366	1.49028	0.000317675	0.269388	0.014966	0.0735979	PML; STOML1; RCC1; PHACTR4; MED18; SESN2; ATPIF1; DNAJC8; PTAFR; RPA2; THEMIS2; IFI6; FGR; WASF2; GPR3; WDTC1; SLC9A1; KDF1; NUDC; NR0B2; GPATCH3; CHIC2; CACNA2D1; CEP85L; PLN; TIMP2; CDC42EP4; CBX1; ANKFN1; BCAS3; PPM1D; CA4; GGNBP2; LHX1; AATF; CCL2; NF1; SRRM3; MYH11; NDE1; PTPN18; ALCAM; ARMC12; SRPK1; FAM118A; WNT7B; MTHFD1L; NFIC;
TOV112D	8	1276	9.7561	1.47194	0.176243	1	1	1	LOXL1; RCC1; DNAJC8; WASF2; NUDC; TIMP2; CBX1; ALCAM;
LNCaP	8	1455	9.7561	1.29086	0.279724	1	1	1	RCC1; DNAJC8; NUDC; STIM2; TIMP2; CBX1; ALCAM; MTHFD1L;
Corpus, uterine	42	6997	51.2195	1.40784	0.00417269	1	0.0737175	0.362518	PML; RCC1; PHACTR4; MED18; SESN2; ATPIF1; DNAJC8; PTAFR; RPA2; THEMIS2; IFI6; FGR; WASF2; GPR3; WDTC1; KDF1; NUDC; GPATCH3; KIFC3; CHIC2; CACNA2D1; CEP85L; TIMP2; CDC42EP4; CBX1; PPM1D; CA4; GGNBP2; LHX1; AATF; CCL2; NF1; SRRM3; MYH11; NDE1; PTPN18; ALCAM; SRPK1; FAM118A; WNT7B; MTHFD1L; NFIC;
Appendix	48	7004	58.5366	1.6073	3.68769e-05	0.0312716	0.011426	0.0561895	PML; RCC1; PHACTR4; MED18; SESN2; ATPIF1; DNAJC8; PTAFR; RPA2; THEMIS2; IFI6; FGR; WASF2; WDTC1; SLC9A1; KDF1; NUDC; GPATCH3; GPN2; STPG1; KIFC3; CHIC2; CACNA2D1; CNTNAP2; CEP85L; PLN; TIMP2; CDC42EP4; PECAM1; CBX1; ANKFN1; PPM1D; CA4; GGNBP2; LHX1; AATF; CCL2; NF1; SRRM3; MYH11; NDE1; PTPN18; ALCAM; ARMC12; SRPK1; WNT7B; MTHFD1L; NFIC;
Erythrocytes	4	1539	4.87805	0.610964	0.902503	1	1	1	PML; PHACTR4; DNAJC8; NDE1;
HTB75	6	1277	7.31707	1.10355	0.464451	1	1	1	RCC1; DNAJC8; WASF2; NUDC; TIMP2; CBX1;
Smooth muscle cells	33	5124	40.2439	1.5106	0.00501609	1	0.0850729	0.41836	PML; RCC1; PHACTR4; SESN2; DNAJC8; RPA2; THEMIS2; FGR; WASF2; GPR3; WDTC1; NUDC; GPATCH3; CACNA2D1; CEP85L; PLN; TIMP2; CDC42EP4; CBX1; LHX1; AATF; CCL2; SRRM3; MYH11; NDE1; PTPN18; ALCAM; ARMC12; SRPK1; UPK3A; WNT7B; MTHFD1L; NFIC;
Gastric juice	1	243	1.21951	0.974563	0.648313	1	1	1	CLPS;
Urine	11	3267	13.4146	0.790223	0.844558	1	1	1	TBC1D21; KIFC3; CACNA2D1; CNTNAP2; CEP85L; TIMP2; CA4; NF1; ALCAM; CLPS; UPK3A;
Heart	25	5507	30.4878	1.0649	0.395489	1	1	1	STOML1; LOXL1; SESN2; PTAFR; WASF2; MAP3K6; SYTL1; NUDC; NR0B2; PLEKHM2; KAZN; KIFC3; STIM2; CACNA2D1; BCAS3; APPBP2; CA4; GGNBP2; LHX1; AATF; CCL13; SRPK1; MTHFD1L; NFIC; FZR1;
Amygdala	7	1204	8.53659	1.36521	0.253047	1	1	1	STOML1; THEMIS2; SYTL1; KAZN; STIM2; CNTNAP2; PDS5B;
Red blood cells	1	166	1.21951	1.42659	0.509551	1	1	1	CA4;
Thyroid gland	44	7306	53.6585	1.41248	0.00277178	1	0.0522326	0.256862	PML; STOML1; RCC1; PHACTR4; MED18; SESN2; ATPIF1; DNAJC8; PTAFR; RPA2; THEMIS2; IFI6; FGR; WASF2; GPR3; WDTC1; KDF1; NUDC; KIFC3; CHIC2; CEP85L; TIMP2; CDC42EP4; CBX1; ANKFN1; BCAS3; PPM1D; CA4; GGNBP2; LHX1; AATF; CCL2; NF1; SRRM3; MYH11; NDE1; PTPN18; ALCAM; CLPS; SRPK1; FAM118A; WNT7B; MTHFD1L; NFIC;
H460	5	736	6.09756	1.59612	0.205169	1	1	1	RCC1; NUDC; TIMP2; CBX1; ALCAM;
Heart muscle	39	6191	47.561	1.4775	0.00261806	1	0.0516305	0.253902	PML; RCC1; PHACTR4; SESN2; ATPIF1; DNAJC8; PTAFR; RPA2; THEMIS2; IFI6; FGR; WASF2; WDTC1; KDF1; GPATCH3; CHIC2; CACNA2D1; CEP85L; PLN; TIMP2; CDC42EP4; CBX1; ANKFN1; PPM1D; CA4; LHX1; AATF; NF1; SRRM3; MYH11; NDE1; PTPN18; ARMC12; CLPS; SRPK1; UPK3A; FAM118A; WNT7B; NFIC;
B Cell	6	2254	7.31707	0.625218	0.929683	1	1	1	RCC1; RPA2; FGR; NUDC; CBX1; MYH11;
Spinal cord	7	1465	8.53659	1.12199	0.434882	1	1	1	STOML1; SYTL1; KAZN; STIM2; CNTNAP2; NF1; PDS5B;
Malignant glioma	46	7169	56.0976	1.50489	0.000398404	0.337847	0.0159593	0.0784828	PML; RCC1; PHACTR4; MED18; SESN2; ATPIF1; DNAJC8; PTAFR; RPA2; THEMIS2; IFI6; FGR; WASF2; GPR3; WDTC1; KDF1; NUDC; GPATCH3; CHIC2; CACNA2D1; CNTNAP2; CEP85L; TIMP2; CDC42EP4; CBX1; ANKFN1; PPM1D; CA4; GGNBP2; LHX1; AATF; CCL2; NF1; SRRM3; MYH11; NDE1; PTPN18; ALCAM; ARMC12; CLPS; SRPK1; UPK3A; FAM118A; WNT7B; MTHFD1L; NFIC;
Cervical cancer	47	7426	57.3171	1.48439	0.000449543	0.381212	0.0165745	0.0815077	PML; RCC1; PHACTR4; MED18; SESN2; ATPIF1; DNAJC8; PTAFR; RPA2; THEMIS2; IFI6; FGR; WASF2; GPR3; WDTC1; SLC9A1; KDF1; NUDC; GPATCH3; GPN2; KIFC3; CHIC2; CEP85L; TIMP2; CDC42EP4; CBX1; ANKFN1; PPM1D; CA4; GGNBP2; LHX1; AATF; CCL2; NF1; SRRM3; MYH11; NDE1; PTPN18; ALCAM; ARMC12; CLPS; SRPK1; UPK3A; FAM118A; WNT7B; MTHFD1L; NFIC;
Malignant melanoma	48	7459	58.5366	1.50926	0.000224253	0.190166	0.013651	0.0671312	PML; RCC1; PHACTR4; MED18; SESN2; ATPIF1; DNAJC8; RPA2; THEMIS2; IFI6; FGR; WASF2; GPR3; WDTC1; SLC9A1; KDF1; NUDC; GPATCH3; KIFC3; CHIC2; CACNA2D1; CNTNAP2; CEP85L; PLN; TIMP2; CDC42EP4; CBX1; ANKFN1; PPM1D; CA4; GGNBP2; LHX1; AATF; CCL2; NF1; SRRM3; MYH11; NDE1; PTPN18; ALCAM; ARMC12; CLPS; SRPK1; UPK3A; FAM118A; WNT7B; MTHFD1L; NFIC;
Oesophagus	3	921	3.65854	0.766328	0.758826	1	1	1	LHX1; MYH11; NFIC;
Embryonal carcinoma cells	4	1232	4.87805	0.763208	0.778749	1	1	1	STX12; KDF1; MYH11; MTHFD1L;
ES2	15	3527	18.2927	0.997899	0.549562	1	1	1	PML; LOXL1; RCC1; ATPIF1; DNAJC8; RPA2; STX12; WASF2; NUDC; CACNA2D1; TIMP2; CBX1; ALCAM; SRPK1; MTHFD1L;
Ovary	47	8592	57.3171	1.28295	0.0143033	1	0.186603	0.917651	PML; STOML1; RCC1; PHACTR4; SESN2; ATPIF1; DNAJC8; PTAFR; RPA2; THEMIS2; STX12; IFI6; FGR; WASF2; GPR3; SYTL1; WDTC1; KDF1; NUDC; PLEKHM2; KAZN; STIM2; CACNA2D1; CNTNAP2; CEP85L; TIMP2; CDC42EP4; PECAM1; CBX1; GGNBP2; LHX1; AATF; CCL13; CCL2; NF1; SRRM3; MYH11; NDE1; PTPN18; ALCAM; CLPS; SRPK1; UPK3A; FAM118A; WNT7B; MTHFD1L; NFIC;
Liver cancer	49	7697	59.7561	1.49305	0.000234494	0.198851	0.013651	0.0671312	PML; RCC1; PHACTR4; MED18; SESN2; ATPIF1; DNAJC8; PTAFR; RPA2; THEMIS2; IFI6; FGR; WASF2; GPR3; WDTC1; SLC9A1; KDF1; NUDC; GPATCH3; STPG1; KIFC3; CHIC2; CACNA2D1; CNTNAP2; CEP85L; PLN; TIMP2; CDC42EP4; PECAM1; CBX1; ANKFN1; PPM1D; CA4; GGNBP2; LHX1; AATF; CCL2; NF1; SRRM3; MYH11; NDE1; PTPN18; ALCAM; ARMC12; SRPK1; FAM118A; WNT7B; MTHFD1L; NFIC;
Dendritic cells	7	1954	8.53659	0.841209	0.740034	1	1	1	RPA2; THEMIS2; FGR; WASF2; TIMP2; PECAM1; CBX1;
OVCAR3	14	3714	17.0732	0.88452	0.738365	1	1	1	PML; LOXL1; RCC1; PHACTR4; DNAJC8; RPA2; NUDC; TIMP2; CDC42EP4; CBX1; NDE1; ALCAM; SRPK1; MTHFD1L;
Huh7	16	2976	19.5122	1.26145	0.192235	1	1	1	PML; RCC1; RPA2; SLC9A1; KDF1; TIMP2; CDC42EP4; ANKFN1; AATF; NF1; MYH11; TEKT5; PDS5B; ALCAM; WNT7B; NFIC;
Serum	40	7685	48.7805	1.22078	0.0651491	1	0.6278	1	EMX2; PML; STOML1; TBC1D21; RCC1; PHACTR4; MED18; SESN2; ATPIF1; DNAJC8; EYA3; RPA2; FCN3; SYTL1; TMEM222; SLC9A1; KDF1; NUDC; GPN2; STPG1; GRHL3; STIM2; CACNA2D1; CNTNAP2; CEP85L; TIMP2; CDC42EP4; CBX1; LHX1; AATF; NF1; SRRM3; MYH11; NDE1; PDS5B; ALCAM; SRPK1; FAM118A; WNT7B; MTHFD1L;
Lens	4	1037	4.87805	0.906722	0.651715	1	1	1	PML; RPA2; THEMIS2; WASF2;
Breast	42	6413	51.2195	1.53604	0.000612789	0.519645	0.0190977	0.0939163	PML; RCC1; PHACTR4; MED18; SESN2; ATPIF1; DNAJC8; PTAFR; RPA2; THEMIS2; IFI6; FGR; WASF2; GPR3; WDTC1; KDF1; NUDC; GPATCH3; CHIC2; CEP85L; TIMP2; CDC42EP4; CBX1; ANKFN1; PPM1D; CA4; GGNBP2; LHX1; AATF; CCL2; NF1; SRRM3; MYH11; NDE1; PTPN18; ALCAM; CLPS; SRPK1; FAM118A; WNT7B; MTHFD1L; NFIC;
Hair	2	817	2.43902	0.576875	0.868645	1	1	1	RCC1; STX12;
H520	5	843	6.09756	1.39353	0.290569	1	1	1	DNAJC8; NUDC; TIMP2; CBX1; ALCAM;
Nipple aspirate fluid	3	754	3.65854	0.936057	0.628834	1	1	1	CACNA2D1; TIMP2; ALCAM;
Uterus	6	917	7.31707	1.53678	0.196487	1	1	1	EMX2; STOML1; SYTL1; PLN; AATF; MTHFD1L;
T24	1	123	1.21951	1.92528	0.409799	1	1	1	ALCAM;
CPE_SCX_fractionated	10	2331	12.1951	1.00694	0.542453	1	1	1	PML; RCC1; RPA2; STX12; SYTL1; STIM2; CDC42EP4; NF1; ALCAM; NFIC;
CRC	19	4247	23.1707	1.04957	0.448902	1	1	1	RCC1; DNAJC8; RPA2; FGR; WASF2; NUDC; GINS3; TIMP2; PECAM1; CBX1; AATF; NF1; SRRM3; MYH11; NDE1; PDS5B; ALCAM; SRPK1; MTHFD1L;
Preadipocytes	2	510	2.43902	0.924124	0.64374	1	1	1	TIMP2; CCL2;
Fetal hepatocytes	18	3784	21.9512	1.11603	0.343335	1	1	1	PML; RCC1; RPA2; FAM76A; FCN3; WDTC1; SLC9A1; GRHL3; CDC42EP4; CBX1; ANKFN1; BCAS3; PPM1D; NF1; PDS5B; ALCAM; WNT7B; MTHFD1L;
Amniotic fluid	2	566	2.43902	0.832692	0.69969	1	1	1	TIMP2; ALCAM;
Vulva/anal skin	42	6377	51.2195	1.54471	0.000537404	0.455718	0.0182287	0.0896429	PML; RCC1; PHACTR4; MED18; SESN2; ATPIF1; DNAJC8; PTAFR; RPA2; THEMIS2; IFI6; FGR; WASF2; GPR3; WDTC1; KDF1; NUDC; GPATCH3; STPG1; KIFC3; CEP85L; PLN; TIMP2; CDC42EP4; CBX1; ANKFN1; PPM1D; GGNBP2; LHX1; AATF; CCL2; NF1; SRRM3; MYH11; NDE1; PTPN18; ALCAM; SRPK1; UPK3A; WNT7B; MTHFD1L; NFIC;
	4	1183	4.87805	0.79482	0.750687	1	1	1	FGR; TIMP2; NF1; MYH11;
HH4	16	2684	19.5122	1.39868	0.101132	1	0.840784	1	PML; RCC1; MED18; FAM76A; SYTL1; NIPAL3; STIM2; CNTNAP2; TIMP2; CBX1; ANKFN1; CCL2; NF1; MYH11; ALCAM; NFIC;
Ramos	6	1566	7.31707	0.899897	0.666709	1	1	1	STX12; FGR; WASF2; NUDC; NF1; PTPN18;
Leukocytes	20	2845	24.3902	1.64921	0.0147373	1	0.189352	0.931172	PML; STOML1; SESN2; DNAJC8; PTAFR; RPA2; THEMIS2; FGR; WASF2; NUDC; GRHL3; KAZN; BCAS3; AATF; CCL2; PTPN18; ALCAM; SRPK1; MTHFD1L; FZR1;
Renal cancer	45	7121	54.878	1.48211	0.000736552	0.624597	0.0204183	0.10041	PML; RCC1; PHACTR4; SESN2; ATPIF1; DNAJC8; PTAFR; RPA2; THEMIS2; IFI6; FGR; WASF2; GPR3; WDTC1; KDF1; NUDC; GPN2; STPG1; KIFC3; CHIC2; CACNA2D1; CNTNAP2; CEP85L; PLN; TIMP2; CDC42EP4; CBX1; PPM1D; CA4; GGNBP2; LHX1; AATF; CCL2; NF1; SRRM3; MYH11; NDE1; PTPN18; ALCAM; ARMC12; SRPK1; FAM118A; WNT7B; MTHFD1L; NFIC;
Aorta	2	530	2.43902	0.889252	0.664597	1	1	1	STOML1; SYTL1;
Thyroid	3	889	3.65854	0.793912	0.737094	1	1	1	LHX1; ALCAM; NFIC;
hupo46_reference_cam	2	1042	2.43902	0.452311	0.941243	1	1	1	FCN3; ALCAM;
Substantia nigra	6	1146	7.31707	1.2297	0.363432	1	1	1	STOML1; SYTL1; KAZN; STIM2; CNTNAP2; PDS5B;
Vagina	33	5307	40.2439	1.45851	0.00884604	1	0.129335	0.636028	PML; RCC1; PHACTR4; MED18; SESN2; ATPIF1; DNAJC8; RPA2; IFI6; FGR; WASF2; GPR3; KDF1; NUDC; GPATCH3; CHIC2; CEP85L; TIMP2; CDC42EP4; CBX1; PPM1D; CA4; LHX1; AATF; CCL2; NF1; NDE1; PTPN18; ARMC12; SRPK1; WNT7B; MTHFD1L; NFIC;
Monocytes	6	745	7.31707	1.89158	0.0982602	1	0.840784	1	THEMIS2; FGR; PECAM1; CCL1; CCL13; MYH11;
MDA-MB-468	2	770	2.43902	0.612086	0.845653	1	1	1	NUDC; ALCAM;
Platelets	11	2168	13.4146	1.1908	0.317353	1	1	1	PML; STOML1; PTAFR; STX12; FGR; WASF2; FCN3; TIMP2; PECAM1; MYH11; PTPN18;
HL60	4	545	4.87805	1.72525	0.203212	1	1	1	PTAFR; SLC9A1; PECAM1; ALCAM;
TOV21G	5	904	6.09756	1.2995	0.342012	1	1	1	LOXL1; RCC1; NUDC; TIMP2; ALCAM;
Oral mucosa	33	5861	40.2439	1.32064	0.0378449	1	0.401156	1	PML; RCC1; SESN2; ATPIF1; DNAJC8; RPA2; THEMIS2; IFI6; FGR; WASF2; GPR3; KDF1; NUDC; GPATCH3; CEP85L; TIMP2; CDC42EP4; CBX1; PPM1D; CA4; LHX1; AATF; CCL2; NF1; SRRM3; NDE1; PTPN18; ALCAM; SRPK1; UPK3A; WNT7B; MTHFD1L; NFIC;
Esophagus	37	6034	45.122	1.43822	0.00610789	1	0.101559	0.499432	PML; RCC1; PHACTR4; MED18; SESN2; ATPIF1; DNAJC8; PTAFR; RPA2; THEMIS2; IFI6; FGR; WASF2; GPR3; WDTC1; KDF1; NUDC; GPATCH3; CHIC2; CEP85L; TIMP2; CDC42EP4; CBX1; PPM1D; CA4; GGNBP2; LHX1; AATF; CCL2; NF1; SRRM3; NDE1; PTPN18; SRPK1; WNT7B; MTHFD1L; NFIC;
Corpus callosum	4	988	4.87805	0.95169	0.613383	1	1	1	KAZN; STIM2; CNTNAP2; PDS5B;
NB4	3	711	3.65854	0.992667	0.588695	1	1	1	PTAFR; PECAM1; ALCAM;
Mammary gland	3	760	3.65854	0.928667	0.634221	1	1	1	STOML1; THEMIS2; WNT7B;
031003_BALF2	4	1102	4.87805	0.853241	0.698636	1	1	1	RCC1; RPA2; CBX1; ALCAM;
CaOV3	14	3355	17.0732	0.979168	0.581104	1	1	1	PML; RCC1; PHACTR4; DNAJC8; RPA2; STX12; WASF2; NUDC; TIMP2; CBX1; MYH11; NDE1; PDS5B; ALCAM;
Cerebrospinal fluid	7	1059	8.53659	1.55214	0.165041	1	1	1	STX12; CACNA2D1; CNTNAP2; TIMP2; ANKFN1; CA4; ALCAM;
Melanoma	13	1826	15.8537	1.67066	0.0448635	1	0.458365	1	PML; RCC1; DNAJC8; STX12; FGR; WASF2; SYTL1; NUDC; CDC42EP4; CBX1; CCL1; MYH11; SRPK1;
Subthalamic nucleus	6	882	7.31707	1.59777	0.174002	1	1	1	STOML1; SYTL1; KAZN; STIM2; CNTNAP2; PDS5B;
Melanocytes	1	71	1.21951	3.33514	0.262108	1	1	1	NF1;
J82	1	216	1.21951	1.09638	0.604751	1	1	1	ALCAM;
15_clinprot_c3	4	749	4.87805	1.25536	0.397027	1	1	1	RCC1; FCN3; CBX1; CLPS;
Ubiquitous	3	1052	3.65854	0.670902	0.833272	1	1	1	PML; SLC9A1; BCAS3;
Cortex	2	683	2.43902	0.690052	0.793467	1	1	1	ATPIF1; CNTNAP2;
N06cs122	3	123	3.65854	5.73771	0.0156753	1	0.195481	0.961309	PECAM1; NF1; PTPN18;
17_wcx	4	1438	4.87805	0.653876	0.870709	1	1	1	RCC1; FCN3; CBX1; ALCAM;
hupo1_b2-edta_cam	2	316	2.43902	1.49145	0.391158	1	1	1	FCN3; CACNA2D1;
H23	6	896	7.31707	1.5728	0.182861	1	1	1	RCC1; DNAJC8; NUDC; TIMP2; CBX1; CCL2;
YTS	7	1888	8.53659	0.870616	0.706132	1	1	1	STOML1; TMEM222; STIM2; SNX11; NF1; NDE1; MTHFD1L;
hupo1_b2-hep_cam	3	848	3.65854	0.832297	0.707078	1	1	1	STX12; STIM2; ALCAM;
Embryonic stem cells	12	3047	14.6341	0.924234	0.664281	1	1	1	RCC1; STX12; TMEM222; SLC9A1; CACNA2D1; AATF; MYH11; PDS5B; ALCAM; SRPK1; FAM118A; MTHFD1L;
Saliva	1	912	1.21951	0.259678	0.981552	1	1	1	SLC9A1;
Nuclear	6	1319	7.31707	1.06841	0.496242	1	1	1	RCC1; MED18; RPA2; PDS5B; ALCAM; NFIC;
N06CS98-2	3	165	3.65854	4.27729	0.0335576	1	0.370197	1	FGR; PECAM1; PTPN18;
MV4-11	1	382	1.21951	0.619954	0.807723	1	1	1	FGR;
Caudate nucleus	6	1204	7.31707	1.17046	0.408288	1	1	1	STOML1; SYTL1; KAZN; STIM2; CNTNAP2; PDS5B;
Retina	4	364	4.87805	2.58312	0.0701164	1	0.632539	1	KIFC3; TIMP2; PECAM1; CCL2;
Medulla oblongata	3	473	3.65854	1.49214	0.327951	1	1	1	STOML1; SYTL1; CNTNAP2;
Bladder cancer cells	1	369	1.21951	0.641794	0.796514	1	1	1	MYH11;
PC3(AR)6	2	262	2.43902	1.79883	0.307639	1	1	1	TIMP2; ALCAM;
Parathyroid	3	782	3.65854	0.902541	0.653518	1	1	1	LHX1; ALCAM; NFIC;
HEK293	21	4439	25.6098	1.10982	0.332953	1	1	1	PML; RCC1; DNAJC8; RPA2; STX12; WASF2; TMEM222; WDTC1; SLC9A1; NUDC; PLEKHM2; CDC42EP4; CBX1; BCAS3; AATF; NF1; NDE1; PDS5B; ALCAM; SRPK1; MTHFD1L;
A549	2	997	2.43902	0.472726	0.930718	1	1	1	ATPIF1; MAP3K6;
Semen	5	966	6.09756	1.2161	0.395029	1	1	1	CACNA2D1; CNTNAP2; TIMP2; CA4; ALCAM;
Keratinocytes	2	250	2.43902	1.88517	0.288715	1	1	1	KAZN; NF1;
Fetus	12	2992	14.6341	0.941223	0.638149	1	1	1	PML; STOML1; THEMIS2; KAZN; STIM2; TIMP2; BCAS3; LHX1; CCL13; MYH11; PDS5B; WNT7B;
MCF7	1	317	1.21951	0.74707	0.744852	1	1	1	ALCAM;
Adducin	2	486	2.43902	0.969758	0.617404	1	1	1	PML; RCC1;
MCF10A	4	661	4.87805	1.42249	0.311365	1	1	1	RCC1; DNAJC8; TIMP2; ALCAM;
22_mars	1	196	1.21951	1.20825	0.569087	1	1	1	FCN3;
041803_BALF3	7	1103	8.53659	1.49022	0.19013	1	1	1	PML; RCC1; DNAJC8; THEMIS2; WASF2; NUDC; ALCAM;
Macrophages	3	274	3.65854	2.5758	0.112071	1	0.902765	1	FGR; CCL1; CCL13;
Muscle	6	904	7.31707	1.55888	0.188006	1	1	1	MAP3K6; KIFC3; CACNA2D1; CA4; CCL13; FZR1;
MicroProt2	4	561	4.87805	1.67605	0.217452	1	1	1	LOXL1; FCN3; TIMP2; CLPS;
Ventricles	1	151	1.21951	1.5683	0.476805	1	1	1	PTAFR;
Endometrium	6	1202	7.31707	1.17241	0.406741	1	1	1	PTAFR; PECAM1; LHX1; MYH11; ALCAM; NFIC;
Thalamus	6	1141	7.31707	1.23509	0.359576	1	1	1	STOML1; SYTL1; KAZN; STIM2; CNTNAP2; PDS5B;
Putamen	3	527	3.65854	1.33925	0.390953	1	1	1	STOML1; SYTL1; CNTNAP2;
PT45	2	361	2.43902	1.30554	0.457321	1	1	1	TIMP2; ALCAM;
Colorectal cancer cells	1	561	1.21951	0.422147	0.912226	1	1	1	MYH11;
ARPE-19	1	330	1.21951	0.717641	0.758869	1	1	1	MYH11;
Temporal lobe	3	477	3.65854	1.47963	0.332635	1	1	1	STOML1; SYTL1; CNTNAP2;
RMUG	2	499	2.43902	0.944495	0.631847	1	1	1	TIMP2; ALCAM;
DU145	3	941	3.65854	0.750041	0.771672	1	1	1	TIMP2; ALCAM; SRPK1;
Epidermis	1	95	1.21951	2.49267	0.334329	1	1	1	KAZN;
Cervico-vaginal fluid	1	565	1.21951	0.419158	0.913758	1	1	1	PML;
Embryo	1	104	1.21951	2.27698	0.359572	1	1	1	ALCAM;
Uterine cervix	3	902	3.65854	0.78247	0.746099	1	1	1	LHX1; ALCAM; NFIC;
Thymus	1	456	1.21951	0.519349	0.860835	1	1	1	MTHFD1L;
Aspc1	1	483	1.21951	0.490318	0.876358	1	1	1	TIMP2;
Vermiform appendix	1	286	1.21951	0.828043	0.708095	1	1	1	STOML1;
Mast cells	1	62	1.21951	3.8192	0.233075	1	1	1	CCL1;
Trachea	4	612	4.87805	1.53638	0.264496	1	1	1	STOML1; THEMIS2; MYH11; UPK3A;
050603_BALF11	2	1019	2.43902	0.46252	0.936066	1	1	1	STIM2; SRPK1;
RBC	2	267	2.43902	1.76515	0.315499	1	1	1	TMEM222; SRPK1;
Hepatocytes	1	73	1.21951	3.24378	0.268411	1	1	1	FCN3;
Nervous system	1	212	1.21951	1.11706	0.59786	1	1	1	NF1;
HPDE6	3	414	3.65854	1.70478	0.259279	1	1	1	NUDC; TIMP2; ALCAM;
Occipital lobe	2	359	2.43902	1.31281	0.454464	1	1	1	STOML1; SYTL1;
N06CS97	3	270	3.65854	2.61396	0.10848	1	0.884531	1	FGR; PECAM1; PTPN18;
Blood vessels	2	130	2.43902	3.6252	0.106315	1	0.875293	1	PML; NF1;
MiaPaCa2	2	289	2.43902	1.63078	0.349827	1	1	1	DNAJC8; TIMP2;
Intestine	3	508	3.65854	1.38933	0.368878	1	1	1	WASF2; NR0B2; FZR1;
Adipocytes	1	147	1.21951	1.61097	0.467715	1	1	1	CCL2;
Pituitary gland	1	494	1.21951	0.4794	0.88218	1	1	1	STOML1;
Vulva	3	838	3.65854	0.842229	0.69938	1	1	1	LHX1; ALCAM; NFIC;
B cells	5	533	6.09756	2.20402	0.0773881	1	0.690791	1	FGR; WASF2; PECAM1; CA4; ALCAM;
SH-SY5Y	2	537	2.43902	0.87766	0.671665	1	1	1	ATPIF1; BCAS3;
Hematopoietic stem cells	2	200	2.43902	2.35644	0.209904	1	1	1	FGR; ALCAM;
20_cys	1	96	1.21951	2.46671	0.337182	1	1	1	FCN3;
Natural killer cell	1	106	1.21951	2.23402	0.365052	1	1	1	CCL1;
Panc1	3	346	3.65854	2.03981	0.183514	1	1	1	DNAJC8; NUDC; ALCAM;
Frontal lobe	3	480	3.65854	1.47038	0.336149	1	1	1	STOML1; SYTL1; CNTNAP2;
Lymphocytes	2	468	2.43902	1.00706	0.596708	1	1	1	FGR; MTHFD1L;
Bronchoalveolar fluid	1	186	1.21951	1.2732	0.550081	1	1	1	MYH11;
Bronchial epithelial cells	2	69	2.43902	6.82962	0.0350517	1	0.381074	1	FCN3; CCL13;
Kidney cancer	2	352	2.43902	1.33892	0.444401	1	1	1	MAP3K6; PECAM1;
Umbilical vein endothelial cells	3	178	3.65854	3.96492	0.0405773	1	0.424809	1	GPR3; PECAM1; CCL1;
Eyes	1	122	1.21951	1.94106	0.407255	1	1	1	CA4;
BJ635	1	175	1.21951	1.35323	0.528217	1	1	1	PECAM1;
Mesenchymal stromal cells	1	178	1.21951	1.33042	0.534282	1	1	1	ALCAM;
T lymphocytes	1	32	1.21951	7.39858	0.127904	1	0.977141	1	ALCAM;
Cellzome_Abl_inhibitors_NatureBiotechnology_exp142	1	83	1.21951	2.85301	0.299137	1	1	1	PTPN18;
WM1158	1	212	1.21951	1.11706	0.59786	1	1	1	MYH11;
Occipital pole	1	129	1.21951	1.83574	0.424837	1	1	1	CNTNAP2;
Tongue	1	54	1.21951	4.3849	0.206322	1	1	1	PECAM1;
Gastrointestinal tract	1	23	1.21951	10.2924	0.0936611	1	0.818811	1	CA4;
Arteries	1	30	1.21951	7.89165	0.120407	1	0.928226	1	PTAFR;
Choroid	2	32	2.43902	14.7239	0.0082001	1	0.127269	0.625865	PECAM1; CCL2;
Neurons	1	68	1.21951	3.48226	0.252553	1	1	1	NF1;
Retinal pigmented epithelial cells	1	51	1.21951	4.64279	0.196053	1	1	1	GRHL3;
18_size	1	104	1.21951	2.27698	0.359572	1	1	1	FCN3;
16_clinprot_c8	1	92	1.21951	2.57394	0.325698	1	1	1	FCN3;
b1-SE_nonglyco_qstar	1	90	1.21951	2.63114	0.319883	1	1	1	FCN3;
Eosinophils	2	100	2.43902	4.71265	0.0680096	1	0.632539	1	PTAFR; FGR;
Myocardium	1	30	1.21951	7.89165	0.120407	1	0.928226	1	PLN;
Granulosa lutein cells	1	28	1.21951	8.45514	0.112846	1	0.902765	1	PECAM1;
Cellzome_Abl_inhibitors_NatureBiotechnology_exp143	1	87	1.21951	2.72185	0.311067	1	1	1	PTPN18;
Skin fibroblasts	1	162	1.21951	1.46181	0.501022	1	1	1	CCL13;
Urothelium	1	33	1.21951	7.17445	0.131629	1	0.996619	1	UPK3A;
Uterine myometrium	1	77	1.21951	3.0753	0.280858	1	1	1	PECAM1;
Schwann cells	1	17	1.21951	13.9229	0.0700981	1	0.632539	1	NF1;
Trophoblast	2	44	2.43902	10.7092	0.0151326	1	0.191529	0.941878	PML; PECAM1;
Vas deferens	1	17	1.21951	13.9229	0.0700981	1	0.632539	1	MYH11;
Sympathetic nervous system	1	3	1.21951	78.6806	0.0127387	1	0.171467	0.843218	PML;
Larynx	1	10	1.21951	23.6592	0.0418423	1	0.432711	1	GGNBP2;
Blastocyst	1	9	1.21951	26.2851	0.0377371	1	0.401156	1	ALCAM;
Pancreatic acinus	1	17	1.21951	13.9229	0.0700981	1	0.632539	1	CCL1;
Yolk sac	1	5	1.21951	47.2712	0.021142	1	0.252513	1	ALCAM;
Oligodendrocytes	1	16	1.21951	14.7925	0.0661125	1	0.629926	1	NF1;
Nasal tissue epithelial cells	1	24	1.21951	9.86375	0.0975305	1	0.840784	1	CCL13;
Bile fluid	1	6	1.21951	39.4058	0.0253171	1	0.29012	1	FCN3;
Gall bladder epithelium	1	6	1.21951	39.4058	0.0253171	1	0.29012	1	SYTL1;
Hofbauer cells	1	3	1.21951	78.6806	0.0127387	1	0.171467	0.843218	PML;
Capillary endothelial cell	1	4	1.21951	59.0595	0.0169492	1	0.205328	1	PML;
Umbilical artery	1	8	1.21951	29.5666	0.0336146	1	0.370197	1	MYH11;
Mononuclear cell	1	4	1.21951	59.0595	0.0169492	1	0.205328	1	CD164L2;
Granulosa cell	1	2	1.21951	117.825	0.00851038	1	0.127269	0.625865	PECAM1;

## Sheet: Transcription factor
Analysis: Transcription factor
Dataset name: Halter
Number of genes in the dataset: 82
Number of genes in the dataset (which are available in Transcription factor database) :78
Number of genes in background: 19230
Is analysis quantitative: No
						Corrected p-values
Transcription factor	No. of genes in the dataset	No.of genes in the background dataset	Percentage of genes	Fold enrichment	P-value (Hypergeometric test)	Bonferroni method	BH method	Q-value (Storey-Tibshirani method)
MAFB	3	352	3.65854	2.00505	0.18995	1	0.653925	1	MAP3K6; GRHL3; MTHFD1L;
NFIC	13	2040	15.8537	1.4954	0.0908417	1	0.445383	1	STOML1; DNAJC8; FGR; WDTC1; SLC9A1; GRHL3; KAZN; CNTNAP2; PPM1D; GGNBP2; LHX1; ALCAM; NFIC;
NR1H3	7	1020	8.53659	1.61149	0.144177	1	0.550494	1	LOXL1; RCC1; MAP3K6; SYTL1; NUDC; TIMP2; NF1;
PITX3	3	265	3.65854	2.66328	0.104057	1	0.451592	1	FAM46B; CACNA2D1; CNTNAP2;
RXRA	10	1113	12.1951	2.10886	0.019703	1	0.258601	0.629071	TBC1D21; MAP3K6; SYTL1; NUDC; CNTNAP2; CEP85L; NF1; NDE1; CLPS; NFIC;
SOAT1	9	1261	10.9756	1.6754	0.0879087	1	0.445383	1	STX12; GPR3; TMEM222; KAZN; CACNA2D1; AATF; CCL13; CCL2; NF1;
STAT1	9	1261	10.9756	1.6754	0.0879087	1	0.445383	1	STX12; GPR3; TMEM222; KAZN; CACNA2D1; AATF; CCL13; CCL2; NF1;
DLX2	1	171	1.21951	1.38488	0.520009	1	1	1	CACNA2D1;
DLX3	1	413	1.21951	0.573421	0.83205	1	1	1	AATF;
ETS1	18	2496	21.9512	1.69192	0.0165109	1	0.231152	0.562298	PML; STOML1; SESN2; DNAJC8; PTAFR; EYA3; WASF2; SYTL1; KDF1; GPATCH3; KIFC3; CHIC2; CACNA2D1; CEP85L; APPBP2; SRRM3; FAM118A; MTHFD1L;
HNF1A	6	831	7.31707	1.69582	0.143374	1	0.550494	1	KIFC3; CACNA2D1; CDC42EP4; BCAS3; CA4; NF1;
HOXC9	5	573	6.09756	2.05016	0.0978943	1	0.446909	1	WDTC1; NR0B2; BCAS3; NF1; MTHFD1L;
IRF1	4	811	4.87805	1.15939	0.456662	1	0.941543	1	PML; PTAFR; PLN; TMEM132E;
LHX3	3	1210	3.65854	0.583298	0.896358	1	1	1	WDTC1; CACNA2D1; CNTNAP2;
MEF2A	10	1835	12.1951	1.27911	0.254131	1	0.700388	1	SESN2; FGR; PLEKHM2; KIFC3; CACNA2D1; CEP85L; TIMP2; BCAS3; NF1; WNT7B;
NKX6-1	6	1408	7.31707	1.00088	0.56144	1	1	1	WDTC1; CACNA2D1; CNTNAP2; CEP85L; TIMP2; MTHFD1L;
OTX2	3	324	3.65854	2.17832	0.160472	1	0.581019	1	GRHL3; CACNA2D1; CNTNAP2;
PHOX2A	1	442	1.21951	0.535799	0.852043	1	1	1	PLN;
POU2F1	11	2209	13.4146	1.1687	0.339916	1	0.860066	1	TBC1D21; EYA3; STX12; FCN3; KAZN; CACNA2D1; CNTNAP2; CEP85L; APPBP2; NF1; UPK3A;
POU3F2	1	789	1.21951	0.300159	0.968025	1	1	1	GPR3;
SRF	6	462	7.31707	3.05025	0.0140464	1	0.210697	0.512538	LOXL1; STX12; CACNA2D1; PLN; MYH11; FAM118A;
ARID3A	2	1250	2.43902	0.377047	0.973145	1	1	1	EYA3; CACNA2D1;
EHF	5	753	6.09756	1.56009	0.218146	1	0.700388	1	EYA3; CHIC2; AATF; CCL2; ALCAM;
FOXA1	5	804	6.09756	1.46113	0.258522	1	0.700388	1	STPG1; CHIC2; CACNA2D1; GGNBP2; NF1;
ATF1	6	1037	7.31707	1.35895	0.280766	1	0.73701	1	MED18; STX12; GPR3; PPM1D; APPBP2; NF1;
CREB1	7	973	8.53659	1.68933	0.120893	1	0.497795	1	MED18; STX12; GPR3; KAZN; PPM1D; APPBP2; NF1;
JDP2	7	763	8.53659	2.15427	0.0440739	1	0.384014	0.934148	MED18; STX12; GPR3; KAZN; PPM1D; APPBP2; NF1;
NFYA	19	2544	23.1707	1.75217	0.00957104	1	0.190999	0.464622	EMX2; SESN2; RPA2; WASF2; GPR3; MAP3K6; WDTC1; FAM46B; NUDC; GRHL3; PLN; CDC42EP4; SNX11; BCAS3; GGNBP2; LHX1; SRRM3; NDE1; FAM118A;
PLAU	6	1037	7.31707	1.35895	0.280766	1	0.73701	1	MED18; STX12; GPR3; PPM1D; APPBP2; NF1;
RORA	2	1168	2.43902	0.403517	0.963289	1	1	1	NR0B2; CNTNAP2;
YY1	6	1317	7.31707	1.07004	0.494741	1	0.998996	1	PHACTR4; MED18; RPA2; GGNBP2; MTHFD1L; NFIC;
ELK1	12	1986	14.6341	1.41799	0.136336	1	0.540199	1	STOML1; EYA3; FAM76A; FGR; NUDC; GRHL3; GINS3; BCAS3; AATF; NF1; SRRM3; MTHFD1L;
GABPA	9	2702	10.9756	0.781899	0.831726	1	1	1	STOML1; EYA3; MAP3K6; KDF1; GPN2; GRHL3; CACNA2D1; AATF; FZR1;
CTCF	24	2605	29.2683	2.1612	0.000152795	0.032087	0.032087	0.0780545	TBC1D21; RCC1; SESN2; DNAJC8; EYA3; FGR; GPR3; FCN3; MAP3K6; SLC9A1; NUDC; STPG1; PLEKHM2; CACNA2D1; TMEM132E; CCL1; SRRM3; MYH11; NDE1; PDS5B; ALCAM; ARMC12; WNT7B; MTHFD1L;
FEV	4	526	4.87805	1.78757	0.186696	1	0.653437	1	FGR; KIFC3; CEP85L; FAM118A;
HERPUD1	4	421	4.87805	2.23339	0.105372	1	0.451592	1	FAM76A; FGR; APPBP2; SRRM3;
KLF7	33	4448	40.2439	1.74017	0.000396449	0.0832543	0.0416271	0.101262	STOML1; RCC1; SESN2; PTAFR; EYA3; STX12; FGR; GPR3; CD164L2; MAP3K6; WDTC1; FAM46B; NIPAL3; STPG1; GRHL3; PLEKHM2; KIFC3; CNTNAP2; CEP85L; TIMP2; CDC42EP4; CBX1; SNX11; APPBP2; GGNBP2; AATF; SRRM3; NDE1; PDS5B; LHFPL5; FAM118A; WNT7B; NFIC;
MAF	8	466	9.7561	4.03042	0.000831692	0.174655	0.0582185	0.141622	FGR; SYTL1; STPG1; GRHL3; CACNA2D1; TIMP2; TEKT5; SRPK1;
NANOG	5	204	6.09756	5.75836	0.00180156	0.378328	0.0756656	0.184063	FGR; GRHL3; CACNA2D1; BCAS3; ALCAM;
NR5A1	6	1129	7.31707	1.24821	0.350337	1	0.860066	1	EMX2; PTAFR; FGR; NR0B2; GGNBP2; SRRM3;
RFX1	12	2158	14.6341	1.30498	0.205402	1	0.695716	1	TBC1D21; EYA3; FAM76A; FGR; WDTC1; NUDC; KIFC3; CACNA2D1; CEP85L; SRRM3; ARMC12; FAM118A;
RREB1	10	2136	12.1951	1.09886	0.427567	1	0.928662	1	EMX2; FGR; GPR3; CD164L2; STPG1; GRHL3; CEP85L; TMEM132E; SRRM3; NDE1;
SF1	6	1129	7.31707	1.24821	0.350337	1	0.860066	1	EMX2; PTAFR; FGR; NR0B2; GGNBP2; SRRM3;
SP1	44	7140	53.6585	1.44532	0.00164676	0.345819	0.0756656	0.184063	STOML1; RCC1; PHACTR4; SESN2; DNAJC8; EYA3; STX12; FGR; GPR3; CD164L2; MAP3K6; WDTC1; FAM46B; KDF1; NR0B2; GRHL3; KAZN; KIFC3; STIM2; CNTNAP2; CEP85L; TIMP2; CDC42EP4; CBX1; SNX11; PPM1D; APPBP2; CA4; GGNBP2; LHX1; AATF; TMEM132E; NF1; SRRM3; NDE1; PDS5B; ALCAM; LHFPL5; SRPK1; UPK3A; FAM118A; WNT7B; MTHFD1L; NFIC;
SP4	26	4345	31.7073	1.40366	0.0361042	1	0.361042	0.878268	SESN2; EYA3; STX12; FGR; GPR3; MAP3K6; KDF1; KAZN; CEP85L; TIMP2; CDC42EP4; SNX11; PPM1D; GGNBP2; LHX1; AATF; TMEM132E; SRRM3; NDE1; ALCAM; LHFPL5; SRPK1; UPK3A; FAM118A; MTHFD1L; NFIC;
TCF3	13	2140	15.8537	1.42552	0.120036	1	0.497795	1	RCC1; FGR; WDTC1; GRHL3; KIFC3; CACNA2D1; TIMP2; TMEM132E; MYH11; ARMC12; CLPS; SRPK1; WNT7B;
OTX1	1	848	1.21951	0.279276	0.975428	1	1	1	CACNA2D1;
PITX1	1	848	1.21951	0.279276	0.975428	1	1	1	CACNA2D1;
E2F1	7	1188	8.53659	1.3836	0.24265	1	0.700388	1	RPA2; WDTC1; GINS3; PPM1D; LHX1; PDS5B; NFIC;
EGR1	21	3215	25.6098	1.53234	0.0265094	1	0.292999	0.712745	SESN2; EYA3; FAM76A; GPR3; MAP3K6; WDTC1; SLC9A1; KDF1; NR0B2; GRHL3; CDC42EP4; SNX11; PPM1D; GGNBP2; LHX1; AATF; TMEM132E; SRRM3; NDE1; UPK3A; WNT7B;
NKX2-1	8	711	9.7561	2.64161	0.0108043	1	0.190999	0.464622	EMX2; STX12; KAZN; CACNA2D1; CEP85L; TIMP2; APPBP2; PTPN18;
NRF1	14	2037	17.0732	1.61272	0.0485107	1	0.391817	0.95313	RCC1; MED18; DNAJC8; STX12; KAZN; STIM2; CBX1; PPM1D; AATF; NF1; NDE1; CLPS; SRPK1; NFIC;
BACH1	8	648	9.7561	2.89843	0.00635064	1	0.166704	0.405523	PHACTR4; EYA3; GPR3; STPG1; CACNA2D1; CEP85L; TIMP2; NF1;
HOXB4	1	718	1.21951	0.32984	0.956151	1	1	1	STPG1;
MEIS2	3	527	3.65854	1.33925	0.390953	1	0.892392	1	STPG1; CEP85L; CA4;
NR4A2	3	1042	3.65854	0.677341	0.82836	1	1	1	STPG1; CACNA2D1; SRRM3;
PPARA	4	370	4.87805	2.54123	0.0734891	1	0.4171	1	MAP3K6; SYTL1; STPG1; NF1;
PPARG	10	2016	12.1951	1.16427	0.356313	1	0.860066	1	PHACTR4; EYA3; WASF2; MAP3K6; SYTL1; TMEM222; STPG1; KIFC3; CACNA2D1; MTHFD1L;
HSF1	5	806	6.09756	1.4575	0.260144	1	0.700388	1	STOML1; STX12; NIPAL3; PLN; NF1;
ETV7	7	1049	8.53659	1.56694	0.159563	1	0.581019	1	SESN2; DNAJC8; EYA3; KDF1; CHIC2; CCL2; ALCAM;
NR5A2	3	486	3.65854	1.45223	0.343173	1	0.860066	1	EMX2; GPATCH3; TMEM132E;
TEAD1	1	422	1.21951	0.561192	0.838525	1	1	1	FAM46B;
TFAP2A	1	258	1.21951	0.917905	0.670427	1	1	1	TMEM132E;
ARNT	3	403	3.65854	1.75131	0.246679	1	0.700388	1	NUDC; AATF; TMEM132E;
BSX	1	268	1.21951	0.883656	0.684401	1	1	1	KIFC3;
GSC	1	379	1.21951	0.624861	0.805192	1	1	1	CACNA2D1;
HNF4A	21	3015	25.6098	1.63399	0.0136066	1	0.210697	0.512538	LOXL1; PHACTR4; DNAJC8; EYA3; CD164L2; MAP3K6; SYTL1; TMEM222; WDTC1; NUDC; PLEKHM2; KAZN; CEP85L; BCAS3; CA4; NF1; MYH11; ALCAM; ARMC12; FAM118A; MTHFD1L;
HOXA3	1	573	1.21951	0.413306	0.916744	1	1	1	KAZN;
HOXB3	1	335	1.21951	0.70693	0.764055	1	1	1	ALCAM;
HOXD8	4	811	4.87805	1.15939	0.456662	1	0.941543	1	EMX2; CA4; NF1; MTHFD1L;
ONECUT1	3	564	3.65854	1.25139	0.433376	1	0.928662	1	EYA3; CACNA2D1; CNTNAP2;
PAX7	1	467	1.21951	0.507117	0.867379	1	1	1	CACNA2D1;
POU4F3	2	687	2.43902	0.686034	0.796168	1	1	1	CACNA2D1; NF1;
PRRX2	1	597	1.21951	0.396691	0.925101	1	1	1	CACNA2D1;
VSX2	2	595	2.43902	0.792108	0.725736	1	1	1	CACNA2D1; FAM118A;
CUX1	4	350	4.87805	2.68644	0.0625691	1	0.407572	0.991454	DNAJC8; GINS3; NF1; MTHFD1L;
CACD	2	514	2.43902	0.916932	0.64799	1	1	1	PHACTR4; WASF2;
HOXB13	2	526	2.43902	0.896014	0.660504	1	1	1	APPBP2; PDS5B;
ZNF238	5	799	6.09756	1.47027	0.254479	1	0.700388	1	CD164L2; FCN3; GPATCH3; CACNA2D1; WNT7B;
ZNF513	5	799	6.09756	1.47027	0.254479	1	0.700388	1	CD164L2; FCN3; GPATCH3; CACNA2D1; WNT7B;
MYC	8	1086	9.7561	1.72946	0.0911975	1	0.445383	1	EYA3; WASF2; NUDC; BCAS3; AATF; TMEM132E; CLPS; MTHFD1L;
MYF5	7	1856	8.53659	0.885626	0.688726	1	1	1	EYA3; MAP3K6; WDTC1; CACNA2D1; LHX1; SRRM3; SRPK1;
FOXD1	4	334	4.87805	2.81512	0.0545044	1	0.407572	0.991454	SESN2; CACNA2D1; PDS5B; SRPK1;
POU6F1	3	655	3.65854	1.07753	0.532563	1	1	1	GPR3; CHIC2; CACNA2D1;
ASCL2	12	1499	14.6341	1.87867	0.0246961	1	0.288121	0.700879	SYTL1; GRHL3; KAZN; CACNA2D1; CEP85L; PLN; BCAS3; TMEM132E; SRRM3; SRPK1; MTHFD1L; NFIC;
ESRRA	2	917	2.43902	0.513966	0.907563	1	1	1	EYA3; KIFC3;
LHX4	2	392	2.43902	1.2023	0.500484	1	1	1	EMX2; TBC1D21;
POU3F4	1	366	1.21951	0.647055	0.793837	1	1	1	CNTNAP2;
TCF12	5	1099	6.09756	1.06893	0.50686	1	1	1	WDTC1; GRHL3; STIM2; LHX1; CLPS;
ELF2	4	780	4.87805	1.20547	0.427021	1	0.928662	1	CCL2; MYH11; ALCAM; FAM118A;
ESR1	7	696	8.53659	2.36165	0.0289206	1	0.303666	0.738695	PHACTR4; GPR3; TMEM222; GPN2; LHX1; SRRM3; WNT7B;
FOS	12	1754	14.6341	1.60555	0.0679286	1	0.407572	0.991454	LOXL1; RCC1; PHACTR4; TMEM222; FAM46B; NR0B2; KAZN; CEP85L; TIMP2; NF1; TEKT5; NFIC;
FOSB	12	1754	14.6341	1.60555	0.0679286	1	0.407572	0.991454	LOXL1; RCC1; PHACTR4; TMEM222; FAM46B; NR0B2; KAZN; CEP85L; TIMP2; NF1; TEKT5; NFIC;
JUN	12	1754	14.6341	1.60555	0.0679286	1	0.407572	0.991454	LOXL1; RCC1; PHACTR4; TMEM222; FAM46B; NR0B2; KAZN; CEP85L; TIMP2; NF1; TEKT5; NFIC;
JUNB	12	1754	14.6341	1.60555	0.0679286	1	0.407572	0.991454	LOXL1; RCC1; PHACTR4; TMEM222; FAM46B; NR0B2; KAZN; CEP85L; TIMP2; NF1; TEKT5; NFIC;
JUND	12	1754	14.6341	1.60555	0.0679286	1	0.407572	0.991454	LOXL1; RCC1; PHACTR4; TMEM222; FAM46B; NR0B2; KAZN; CEP85L; TIMP2; NF1; TEKT5; NFIC;
NR6A1	1	769	1.21951	0.307966	0.965046	1	1	1	TMEM132E;
RAB40B	3	806	3.65854	0.875667	0.673747	1	1	1	EYA3; MAP3K6; SYTL1;
RARA	3	806	3.65854	0.875667	0.673747	1	1	1	EYA3; MAP3K6; SYTL1;
SPI1	7	814	8.53659	2.0193	0.0585568	1	0.407572	0.991454	WASF2; BCAS3; APPBP2; CCL1; SRRM3; MYH11; ALCAM;
EN1	1	466	1.21951	0.508205	0.866797	1	1	1	CACNA2D1;
FOXC1	1	301	1.21951	0.78678	0.726491	1	1	1	PDS5B;
HOXA5	5	916	6.09756	1.28248	0.352248	1	0.860066	1	EMX2; TBC1D21; NR0B2; CACNA2D1; NF1;
HOXA7	1	527	1.21951	0.449382	0.89807	1	1	1	MTHFD1L;
HOXB6	2	123	2.43902	3.8315	0.0969239	1	0.446909	1	EMX2; PDS5B;
HOXC6	1	237	1.21951	0.999234	0.639062	1	1	1	CNTNAP2;
LHX8	1	223	1.21951	1.06196	0.616532	1	1	1	EMX2;
MNX1	1	311	1.21951	0.761482	0.738114	1	1	1	EMX2;
NKX1-1	1	146	1.21951	1.622	0.465418	1	0.94891	1	EMX2;
PAX6	1	557	1.21951	0.425178	0.910667	1	1	1	CACNA2D1;
PBX1	1	741	1.21951	0.319602	0.96041	1	1	1	CACNA2D1;
POU5F1	1	373	1.21951	0.634912	0.80003	1	1	1	CACNA2D1;
REST	5	765	6.09756	1.53562	0.227462	1	0.700388	1	FAM76A; WDTC1; CNTNAP2; PDS5B; LHFPL5;
SOX1	1	276	1.21951	0.858043	0.695158	1	1	1	CACNA2D1;
TGIF1	8	1034	9.7561	1.81644	0.0732638	1	0.4171	1	EYA3; KAZN; KIFC3; CEP85L; CA4; LHX1; NF1; SRRM3;
HENMT1	12	1144	14.6341	2.46165	0.00323675	0.679718	0.0971026	0.236211	LOXL1; EYA3; SYTL1; TMEM222; FAM46B; KDF1; GRHL3; PLN; TMEM132E; CCL2; SRRM3; CLPS;
INSM1	4	487	4.87805	1.93072	0.154345	1	0.578793	1	GPR3; WDTC1; SLC9A1; APPBP2;
NHLH1	12	1144	14.6341	2.46165	0.00323675	0.679718	0.0971026	0.236211	LOXL1; EYA3; SYTL1; TMEM222; FAM46B; KDF1; GRHL3; PLN; TMEM132E; CCL2; SRRM3; CLPS;
NR1H4	1	62	1.21951	3.8192	0.233075	1	0.700388	1	NR0B2;
ZEB1	3	401	3.65854	1.76005	0.244399	1	0.700388	1	KDF1; GRHL3; KAZN;
ZFP161	4	1137	4.87805	0.826976	0.722002	1	1	1	CNTNAP2; PDS5B; ALCAM; WNT7B;
BACH2	2	628	2.43902	0.750485	0.753061	1	1	1	GPR3; NF1;
EBF1	3	205	3.65854	3.44274	0.0573199	1	0.407572	0.991454	EYA3; KIFC3; SRRM3;
HOXA13	1	309	1.21951	0.766411	0.735829	1	1	1	CACNA2D1;
MSX2	2	344	2.43902	1.37005	0.432779	1	0.928662	1	EMX2; KAZN;
NOBOX	5	621	6.09756	1.8917	0.125781	1	0.507961	1	EMX2; STIM2; CACNA2D1; BCAS3; NF1;
TFAP4	12	1280	14.6341	2.2001	0.0078436	1	0.183017	0.445206	FCN3; SYTL1; SLC9A1; GRHL3; KAZN; STIM2; CACNA2D1; TMEM132E; SRRM3; PDS5B; CLPS; WNT7B;
ATF3	5	800	6.09756	1.46844	0.255287	1	0.700388	1	MED18; GPR3; CDC42EP4; PPM1D; PTPN18;
TAL1	4	1113	4.87805	0.844808	0.706123	1	1	1	WDTC1; APPBP2; NF1; ALCAM;
HOXA9	6	729	7.31707	1.9331	0.0908482	1	0.445383	1	TBC1D21; STIM2; PLN; TIMP2; NF1; PDS5B;
NFE2	4	518	4.87805	1.81518	0.179882	1	0.640257	1	TIMP2; NF1; TEKT5; NFIC;
RUNX2	4	315	4.87805	2.98492	0.045716	1	0.384014	0.934148	GRHL3; CEP85L; SRRM3; MTHFD1L;
GATA1	4	728	4.87805	1.29158	0.376585	1	0.879732	1	NR0B2; CA4; CCL1; SRRM3;
FOXD3	2	361	2.43902	1.30554	0.457321	1	0.941543	1	CACNA2D1; LHX1;
ISL2	3	515	3.65854	1.37045	0.377028	1	0.879732	1	CACNA2D1; NF1; PDS5B;
ZNF143	2	618	2.43902	0.762629	0.745034	1	1	1	KAZN; CACNA2D1;
CDX2	4	253	4.87805	3.71637	0.0230194	1	0.284358	0.691725	EYA3; WDTC1; NF1; MYH11;
FOXK1	2	121	2.43902	3.89482	0.094287	1	0.446909	1	BCAS3; NF1;
GFI1	5	552	6.09756	2.12816	0.0868086	1	0.445383	1	GRHL3; CNTNAP2; APPBP2; NF1; ALCAM;
HOXB9	3	537	3.65854	1.31431	0.402503	1	0.908877	1	KAZN; TIMP2; PDS5B;
PAX4	3	175	3.65854	4.03289	0.0388961	1	0.370488	0.901246	CACNA2D1; CA4; NF1;
PDX1	3	372	3.65854	1.89725	0.211803	1	0.700388	1	CNTNAP2; PLN; BCAS3;
ATF6	1	195	1.21951	1.21444	0.567223	1	1	1	ALCAM;
STRA13	3	574	3.65854	1.22959	0.444673	1	0.941543	1	DNAJC8; PLEKHM2; NDE1;
ZIC1	2	548	2.43902	0.860043	0.682533	1	1	1	THEMIS2; WNT7B;
FOXJ2	2	299	2.43902	1.57624	0.365254	1	0.871628	1	CACNA2D1; NF1;
ELF1	5	585	6.09756	2.00811	0.10454	1	0.451592	1	STX12; WASF2; NF1; SRRM3; FAM118A;
ITGAL	3	178	3.65854	3.96492	0.0405773	1	0.370488	0.901246	LOXL1; GRHL3; GGNBP2;
TLX2	1	60	1.21951	3.94648	0.226471	1	0.700388	1	SRRM3;
DLX5	2	220	2.43902	2.14223	0.241297	1	0.700388	1	EYA3; CACNA2D1;
HOXC10	1	81	1.21951	2.92345	0.293096	1	0.759878	1	TBC1D21;
ATF4	2	315	2.43902	1.49618	0.389646	1	0.892392	1	KAZN; APPBP2;
ELF3	6	437	7.31707	3.22475	0.0109142	1	0.190999	0.464622	EYA3; CHIC2; CACNA2D1; CCL2; ALCAM; FAM118A;
SPDEF	1	189	1.21951	1.25299	0.555868	1	1	1	EYA3;
NKX3-1	1	61	1.21951	3.8818	0.22978	1	0.700388	1	CACNA2D1;
RBPJ	1	235	1.21951	1.00774	0.635925	1	1	1	KAZN;
MAFK	1	128	1.21951	1.85008	0.422357	1	0.928662	1	KIFC3;

## Sheet: Clinical phenotype
Analysis: Clinical phenotype
Dataset name: Halter
Number of genes in the dataset: 82
Number of genes in the dataset (which are available in Clinical phenotype database) :10
Number of genes in background: 19230
Is analysis quantitative: No
						Corrected p-values
Clinical phenotype	No. of genes in the dataset	No.of genes in the background dataset	Percentage of genes	Fold enrichment	P-value (Hypergeometric test)	Bonferroni method	BH method	Q-value (Storey-Tibshirani method)
Abnormal fibrillar extracellular material in anterior segment tissues	1	1	1.21951	234.484	0.00426417	1	1	1	LOXL1;
Abnormal lens suspensory ligament	1	1	1.21951	234.484	0.00426417	1	1	1	LOXL1;
Agenesis of corpus callosum	1	16	1.21951	14.7925	0.0661125	1	1	1	NDE1;
Allelic disorder to NF1	1	1	1.21951	234.484	0.00426417	1	1	1	NF1;
Allelic to neurofibromatosis-1 (NF1,	1	1	1.21951	234.484	0.00426417	1	1	1	NF1;
Aneurysm, ascending aorta	1	1	1.21951	234.484	0.00426417	1	1	1	MYH11;
Aneurysm, descending aorta (in some patients)	1	1	1.21951	234.484	0.00426417	1	1	1	MYH11;
Anodontia (rare)	1	1	1.21951	234.484	0.00426417	1	1	1	GRHL3;
Aortic valve regurgitation	1	3	1.21951	78.6806	0.0127387	1	1	1	MYH11;
Aqueductal stenosis	1	2	1.21951	117.825	0.00851038	1	1	1	NF1;
Articulation defects	1	2	1.21951	117.825	0.00851038	1	1	1	NF1;
A single recessive locus and other genetic factors cause > 75% of variation	1	16	1.21951	14.7925	0.0661125	1	1	1	NR0B2;
Asymmetric pupil sizes	1	1	1.21951	234.484	0.00426417	1	1	1	LOXL1;
Asymmetry of intraocular pressure	1	1	1.21951	234.484	0.00426417	1	1	1	LOXL1;
Athetosis	1	6	1.21951	39.4058	0.0253171	1	1	1	NDE1;
Atrophic optic fundi	1	1	1.21951	234.484	0.00426417	1	1	1	NDE1;
Atypical cornea guttata	1	1	1.21951	234.484	0.00426417	1	1	1	LOXL1;
Autosomal dominant (17)	1	1	1.21951	234.484	0.00426417	1	1	1	CA4;
Autosomal dominant	6	747	7.31707	1.88652	0.0992091	1	1	1	LOXL1; GRHL3; CHIC2; PPM1D; NF1; MYH11;
Autosomal dominant form	1	37	1.21951	6.39904	0.146372	1	1	1	CCL2;
Autosomal recessive	1	924	1.21951	0.256305	0.982519	1	1	1	NDE1;
Axillary freckling	1	5	1.21951	47.2712	0.021142	1	1	1	NF1;
Behavioral Psychiatric Manifestations	1	200	1.21951	1.18408	0.576465	1	1	1	NDE1;
BREAST CANCER	1	23	1.21951	10.2924	0.0936611	1	1	1	PPM1D;
Breast carcinoma	1	23	1.21951	10.2924	0.0936611	1	1	1	PPM1D;
Cafe-au-lait spots	1	13	1.21951	18.2036	0.0540543	1	1	1	NF1;
Cafe-au-lait spots may or may not be present	1	1	1.21951	234.484	0.00426417	1	1	1	NF1;
Cardiovascular	2	446	2.43902	1.05673	0.570312	1	1	1	NF1; MYH11;
Carotid aneurysm, intracranial (in some patients)	1	1	1.21951	234.484	0.00426417	1	1	1	MYH11;
Cataract, nuclear	1	3	1.21951	78.6806	0.0127387	1	1	1	LOXL1;
Central Nervous System	3	887	3.65854	0.795702	0.735687	1	1	1	NF1; MYH11; NDE1;
Chest	1	243	1.21951	0.974563	0.648313	1	1	1	NF1;
Cleft lip	1	43	1.21951	5.50636	0.168025	1	1	1	GRHL3;
Cleft palate	1	97	1.21951	2.44128	0.340022	1	1	1	GRHL3;
Coronary artery disease (in some patients)	1	1	1.21951	234.484	0.00426417	1	1	1	MYH11;
Cryptorchidism	1	101	1.21951	2.34461	0.351265	1	1	1	NF1;
Cubitus valgus	1	9	1.21951	26.2851	0.0377371	1	1	1	NF1;
Developmental delay, mild	1	2	1.21951	117.825	0.00851038	1	1	1	NF1;
Dissection, ascending aorta (in some patients)	1	1	1.21951	234.484	0.00426417	1	1	1	MYH11;
Dissection, descending aorta (in some patients)	1	1	1.21951	234.484	0.00426417	1	1	1	MYH11;
Downslanted palpebral fissures	1	2	1.21951	117.825	0.00851038	1	1	1	NF1;
Duodenal carcinoid	1	1	1.21951	234.484	0.00426417	1	1	1	NF1;
Ears	2	442	2.43902	1.06629	0.565384	1	1	1	NF1; NDE1;
Enlarged ventricles	1	13	1.21951	18.2036	0.0540543	1	1	1	NDE1;
Epicanthal folds	1	61	1.21951	3.8818	0.22978	1	1	1	NF1;
Equinovarus	1	3	1.21951	78.6806	0.0127387	1	1	1	NDE1;
Evidence of anticipation	1	21	1.21951	11.2722	0.0858731	1	1	1	CHIC2;
Exophthalmia	1	1	1.21951	234.484	0.00426417	1	1	1	NDE1;
External Features	1	180	1.21951	1.31564	0.538282	1	1	1	NF1;
Eyes	4	826	4.87805	1.13834	0.470837	1	1	1	LOXL1; CA4; NF1; NDE1;
Face	2	433	2.43902	1.08846	0.55415	1	1	1	NF1; NDE1;
Familial acute myelogenous leukemia (AML)	1	21	1.21951	11.2722	0.0858731	1	1	1	CHIC2;
Family history of sudden death, as early as fourth decade of life	1	1	1.21951	234.484	0.00426417	1	1	1	MYH11;
Feet	1	345	1.21951	0.68644	0.774099	1	1	1	NDE1;
Freckling may or may not be present	1	1	1.21951	234.484	0.00426417	1	1	1	NF1;
Frontal upsweep of the hair	1	1	1.21951	234.484	0.00426417	1	1	1	NF1;
Genetic heterogeneity	1	142	1.21951	1.66769	0.456131	1	1	1	PPM1D;
Genitourinary	1	478	1.21951	0.495447	0.873618	1	1	1	NF1;
Glaucoma	1	35	1.21951	6.7646	0.139032	1	1	1	NF1;
Growth	2	609	2.43902	0.773899	0.737623	1	1	1	NF1; NDE1;
Hair	1	240	1.21951	0.986745	0.643717	1	1	1	NF1;
Head	2	345	2.43902	1.36608	0.434239	1	1	1	NF1; NDE1;
Head and Neck	4	954	4.87805	0.985608	0.585361	1	1	1	LOXL1; GRHL3; NF1; NDE1;
Heart	2	351	2.43902	1.34273	0.442955	1	1	1	NF1; MYH11;
Height	2	290	2.43902	1.62516	0.351376	1	1	1	NF1; NDE1;
Heme	1	78	1.21951	3.03587	0.283937	1	1	1	CHIC2;
Hydranencephaly	1	4	1.21951	59.0595	0.0169492	1	1	1	NDE1;
Hyperreflexia	1	122	1.21951	1.94106	0.407255	1	1	1	NDE1;
Hypertelorism	1	121	1.21951	1.9571	0.404701	1	1	1	NF1;
Hypertension	1	57	1.21951	4.15416	0.21646	1	1	1	NF1;
Hypoplastic brainstem	1	2	1.21951	117.825	0.00851038	1	1	1	NDE1;
Hypoplastic cerebellum	1	2	1.21951	117.825	0.00851038	1	1	1	NDE1;
Hypothalamic tumor	1	1	1.21951	234.484	0.00426417	1	1	1	NF1;
Inguinal freckling	1	1	1.21951	234.484	0.00426417	1	1	1	NF1;
Internal Genitalia (Male)	1	148	1.21951	1.60008	0.470002	1	1	1	NF1;
Iris hypoperfusion resulting from degenerated stromal vessels	1	1	1.21951	234.484	0.00426417	1	1	1	LOXL1;
Iris rigidity	1	1	1.21951	234.484	0.00426417	1	1	1	LOXL1;
Large ears	1	27	1.21951	8.76818	0.109041	1	1	1	NDE1;
Learning disabilities (30%)	1	1	1.21951	234.484	0.00426417	1	1	1	NF1;
Left ventricular failure	1	1	1.21951	234.484	0.00426417	1	1	1	MYH11;
Lens pseudoexfoliation	1	1	1.21951	234.484	0.00426417	1	1	1	LOXL1;
Lens subluxation	1	1	1.21951	234.484	0.00426417	1	1	1	LOXL1;
Limbs	1	339	1.21951	0.698589	0.768125	1	1	1	NF1;
Lisch nodules	1	1	1.21951	234.484	0.00426417	1	1	1	NF1;
Lisch nodules (iris hamartomas)	1	1	1.21951	234.484	0.00426417	1	1	1	NF1;
Lisch nodules (iris hamartomas) may or may not be present	1	1	1.21951	234.484	0.00426417	1	1	1	NF1;
Local bony overgrowth	1	1	1.21951	234.484	0.00426417	1	1	1	NF1;
Lower extremity weakness	1	2	1.21951	117.825	0.00851038	1	1	1	NF1;
Lower lip pits	1	2	1.21951	117.825	0.00851038	1	1	1	GRHL3;
Low incidence of plexiform neurofibromas	1	1	1.21951	234.484	0.00426417	1	1	1	NF1;
Low IQ	1	1	1.21951	234.484	0.00426417	1	1	1	NF1;
Low nasal root	1	2	1.21951	117.825	0.00851038	1	1	1	NF1;
Low posterior hairline	1	13	1.21951	18.2036	0.0540543	1	1	1	NF1;
Low-set ears	1	97	1.21951	2.44128	0.340022	1	1	1	NF1;
Macrocephaly	1	60	1.21951	3.94648	0.226471	1	1	1	NF1;
Malignant peripheral nerve sheath tumors	1	1	1.21951	234.484	0.00426417	1	1	1	NF1;
Melanin dispersion in iris	1	1	1.21951	234.484	0.00426417	1	1	1	LOXL1;
Meningioma	1	7	1.21951	33.7844	0.0294746	1	1	1	NF1;
Mental retardation, mild (10%)	1	1	1.21951	234.484	0.00426417	1	1	1	NF1;
Metabolic	1	55	1.21951	4.30519	0.209715	1	1	1	NR0B2;
Microcephaly, severe (-5+ SD), progressive	1	1	1.21951	234.484	0.00426417	1	1	1	NDE1;
Midface hypoplasia	1	38	1.21951	6.23069	0.150019	1	1	1	NF1;
Misc	1	219	1.21951	1.08136	0.609843	1	1	1	CHIC2;
Miscellaneous	4	1228	4.87805	0.765694	0.776553	1	1	1	LOXL1; PPM1D; NF1; MYH11;
Moth-eaten' pattern of peripupillary atrophy	1	1	1.21951	234.484	0.00426417	1	1	1	LOXL1;
Mouth	1	417	1.21951	0.567921	0.834959	1	1	1	GRHL3;
Multiple cafe-au-lait spots	1	1	1.21951	234.484	0.00426417	1	1	1	NF1;
Multiple joint contractures	1	2	1.21951	117.825	0.00851038	1	1	1	NDE1;
Muscle atrophy	1	39	1.21951	6.07097	0.153651	1	1	1	NDE1;
Muscle, Soft Tissue	1	341	1.21951	0.694492	0.770133	1	1	1	NDE1;
Myoclonic seizures	1	12	1.21951	19.7193	0.0500008	1	1	1	NDE1;
Neck	1	130	1.21951	1.82162	0.427306	1	1	1	NF1;
Neoplasia	2	151	2.43902	3.12107	0.135812	1	1	1	PPM1D; NF1;
NEURAL TUBE DEFECTS	1	5	1.21951	47.2712	0.021142	1	1	1	CCL2;
Neuro	1	132	1.21951	1.79402	0.432213	1	1	1	CCL2;
Neurofibromas	1	1	1.21951	234.484	0.00426417	1	1	1	NF1;
Neurofibromas can occur at cervical, thoracic, lumbar, and sacral levels	1	1	1.21951	234.484	0.00426417	1	1	1	NF1;
Neurofibromas may or may not be present	1	1	1.21951	234.484	0.00426417	1	1	1	NF1;
NEUROFIBROMATOSIS, FAMILIAL SPINAL	1	1	1.21951	234.484	0.00426417	1	1	1	NF1;
Neurofibrosarcoma	1	1	1.21951	234.484	0.00426417	1	1	1	NF1;
Neurologic	3	930	3.65854	0.758912	0.764676	1	1	1	NF1; MYH11; NDE1;
Neurologic signs in legs	1	5	1.21951	47.2712	0.021142	1	1	1	CCL2;
Nose	2	314	2.43902	1.50095	0.388133	1	1	1	NF1; NDE1;
Obesity	1	43	1.21951	5.50636	0.168025	1	1	1	NR0B2;
OBESITY	1	16	1.21951	14.7925	0.0661125	1	1	1	NR0B2;
Open-angle glaucoma due to pupillary and ciliary block	1	1	1.21951	234.484	0.00426417	1	1	1	LOXL1;
Optic glioma	1	1	1.21951	234.484	0.00426417	1	1	1	NF1;
Other features of neurofibromatosis type I (NF1,	1	1	1.21951	234.484	0.00426417	1	1	1	NF1;
Pachygyria	1	13	1.21951	18.2036	0.0540543	1	1	1	NDE1;
Paraparesis	1	8	1.21951	29.5666	0.0336146	1	1	1	NF1;
Parathyroid adenoma	1	3	1.21951	78.6806	0.0127387	1	1	1	NF1;
Patent ductus arteriosus	1	41	1.21951	5.7749	0.160868	1	1	1	MYH11;
Pectus carinatum superiorly	1	2	1.21951	117.825	0.00851038	1	1	1	NF1;
Pectus excavatum inferiorly	1	2	1.21951	117.825	0.00851038	1	1	1	NF1;
Peripheral vascular occlusive disease (in some patients)	1	1	1.21951	234.484	0.00426417	1	1	1	MYH11;
Phacodonesis	1	1	1.21951	234.484	0.00426417	1	1	1	LOXL1;
Phenotypic overlap between neurofibromatosis type 1 (	1	1	1.21951	234.484	0.00426417	1	1	1	NF1;
Pheochromocytoma	1	5	1.21951	47.2712	0.021142	1	1	1	NF1;
Pigment deposition in the trabecular meshwork	1	1	1.21951	234.484	0.00426417	1	1	1	LOXL1;
Pilocytic astrocytoma	1	1	1.21951	234.484	0.00426417	1	1	1	NF1;
Plexiform neurofibroma	1	1	1.21951	234.484	0.00426417	1	1	1	NF1;
Poor delineation of cerebral cortical regions	1	1	1.21951	234.484	0.00426417	1	1	1	NDE1;
Poor mydriasis	1	1	1.21951	234.484	0.00426417	1	1	1	LOXL1;
Posteriorly rotated ears	1	32	1.21951	7.39858	0.127904	1	1	1	NF1;
Prevalence of 1 in 3,000	1	1	1.21951	234.484	0.00426417	1	1	1	NF1;
Prevalence rates average 10-20% of the general population over age 60	1	1	1.21951	234.484	0.00426417	1	1	1	LOXL1;
Prominent nasal bridge	1	7	1.21951	33.7844	0.0294746	1	1	1	NDE1;
Prominent nasolabial folds	1	5	1.21951	47.2712	0.021142	1	1	1	NF1;
Pseudoarthrosis	1	1	1.21951	234.484	0.00426417	1	1	1	NF1;
Pseudouveitis due to breakdown of blood-aqueous barrier	1	1	1.21951	234.484	0.00426417	1	1	1	LOXL1;
Psychomotor retardation, profound	1	2	1.21951	117.825	0.00851038	1	1	1	NDE1;
Ptosis	1	107	1.21951	2.21314	0.367775	1	1	1	NF1;
Pulmonary valvular stenosis	1	1	1.21951	234.484	0.00426417	1	1	1	NF1;
Pulmonic stenosis	1	7	1.21951	33.7844	0.0294746	1	1	1	NF1;
Regional, racial, and ethnic clustering has been noted	1	1	1.21951	234.484	0.00426417	1	1	1	LOXL1;
Relative macrocephaly	1	1	1.21951	234.484	0.00426417	1	1	1	NF1;
Renal artery stenosis	1	9	1.21951	26.2851	0.0377371	1	1	1	NF1;
Retinal vein occlusion	1	1	1.21951	234.484	0.00426417	1	1	1	LOXL1;
Retinitis pigmentosa	1	39	1.21951	6.07097	0.153651	1	1	1	CA4;
Rhabdomyosarcoma	1	9	1.21951	26.2851	0.0377371	1	1	1	NF1;
Scalp rugae	1	1	1.21951	234.484	0.00426417	1	1	1	NDE1;
Scoliosis	1	118	1.21951	2.00685	0.396972	1	1	1	NF1;
Self-mutilation	1	5	1.21951	47.2712	0.021142	1	1	1	NDE1;
Short neck	1	63	1.21951	3.75859	0.236356	1	1	1	NF1;
Short stature	2	172	2.43902	2.74003	0.166873	1	1	1	NF1; NDE1;
Skeletal	2	634	2.43902	0.743383	0.757774	1	1	1	NF1; NDE1;
Skin	1	539	1.21951	0.439377	0.903306	1	1	1	NF1;
Skin, Nails, Hair	1	554	1.21951	0.427481	0.90948	1	1	1	NF1;
Skull	1	148	1.21951	1.60008	0.470002	1	1	1	NDE1;
Sloping forehead	1	12	1.21951	19.7193	0.0500008	1	1	1	NDE1;
Somatostatinoma	1	1	1.21951	234.484	0.00426417	1	1	1	NF1;
Spastic quadriplegia	1	12	1.21951	19.7193	0.0500008	1	1	1	NDE1;
Speech delay	1	41	1.21951	5.7749	0.160868	1	1	1	NF1;
Sphenoid dysplasia	1	1	1.21951	234.484	0.00426417	1	1	1	NF1;
Spina bifida	2	9	2.43902	52.3099	0.000634204	1	1	1	CCL2; NF1;
Spinal nerve root neurofibromas, symmetric, multiple	1	1	1.21951	234.484	0.00426417	1	1	1	NF1;
Spinal tumors are necessary for diagnosis	1	1	1.21951	234.484	0.00426417	1	1	1	NF1;
Spine	2	286	2.43902	1.64789	0.345176	1	1	1	CCL2; NF1;
Sporadic occurrence is associated with advanced paternal age	1	1	1.21951	234.484	0.00426417	1	1	1	NF1;
Stroke (in some patients)	1	1	1.21951	234.484	0.00426417	1	1	1	MYH11;
Supratentorial structures unformed or regressed	1	1	1.21951	234.484	0.00426417	1	1	1	NDE1;
Susceptibility conferred by mutation in the homolog of the S. pombe checkpoint kinase 2 gene (CHEK2,	1	23	1.21951	10.2924	0.0936611	1	1	1	PPM1D;
Susceptibility conferred by mutation in the lysyl oxidase-like 1 gene (LOXL1,	1	1	1.21951	234.484	0.00426417	1	1	1	LOXL1;
Teeth	1	228	1.21951	1.03868	0.624733	1	1	1	GRHL3;
Thinning of long bone cortex	1	1	1.21951	234.484	0.00426417	1	1	1	NF1;
Tumors at multiple other sites including CNS	1	1	1.21951	234.484	0.00426417	1	1	1	NF1;
Unidentified bright objects on brain MRI	1	1	1.21951	234.484	0.00426417	1	1	1	NF1;
Uvular anomaly	1	1	1.21951	234.484	0.00426417	1	1	1	GRHL3;
Vascular	2	215	2.43902	2.19205	0.233418	1	1	1	NF1; MYH11;
WATSON SYNDROME	1	1	1.21951	234.484	0.00426417	1	1	1	NF1;
Webbed neck	1	12	1.21951	19.7193	0.0500008	1	1	1	NF1;
50% of cases are de novo	1	1	1.21951	234.484	0.00426417	1	1	1	NF1;

## Sheet: COSMIC
Analysis: COSMIC
Dataset name: Halter
Number of genes in the dataset: 82
Number of genes in the dataset (which are available in COSMIC database) :81
Number of genes in background: 19230
Is analysis quantitative: No
						Corrected p-values
COSMIC	No. of genes in the dataset	No.of genes in the background dataset	Percentage of genes	Fold enrichment	P-value (Hypergeometric test)	Bonferroni method	BH method	Q-value (Storey-Tibshirani method)
skin	53	11549	64.6341	1.07628	0.232325	1	1	1	PML; STOML1; TBC1D21; PHACTR4; SESN2; EYA3; RPA2; THEMIS2; FGR; WASF2; FCN3; MAP3K6; WDTC1; SLC9A1; KDF1; NR0B2; GPATCH3; NIPAL3; STPG1; GRHL3; KIFC3; GINS3; STIM2; CACNA2D1; CNTNAP2; CEP85L; TIMP2; CBX1; SNX11; ANKFN1; BCAS3; PPM1D; CA4; GGNBP2; LHX1; AATF; TMEM132E; CCL1; CCL13; CCL2; NF1; MYH11; NDE1; PDS5B; ALCAM; ARMC12; CLPS; LHFPL5; UPK3A; WNT7B; MTHFD1L; NFIC; FZR1;
prostate	41	9587	50	1.00304	0.533491	1	1	1	EMX2; LOXL1; MED18; RPA2; THEMIS2; FGR; WASF2; CD164L2; MAP3K6; WDTC1; SLC9A1; KDF1; STPG1; GRHL3; KAZN; STIM2; CACNA2D1; CNTNAP2; CEP85L; CBX1; ANKFN1; PPM1D; APPBP2; CA4; GGNBP2; LHX1; TMEM132E; CCL13; NF1; MYH11; TEKT5; PDS5B; ALCAM; ARMC12; CLPS; LHFPL5; SRPK1; FAM118A; MTHFD1L; NFIC; FZR1;
biliary tract	7	1799	8.53659	0.913686	0.656206	1	1	1	PHACTR4; TMEM222; SLC9A1; CNTNAP2; NF1; PDS5B; ALCAM;
CancerGeneCensus geneList	4	503	4.87805	1.86931	0.167346	1	1	1	PML; CHIC2; NF1; MYH11;
lung	65	15353	79.2683	0.992886	0.614869	1	1	1	PML; STOML1; LOXL1; TBC1D21; RCC1; MED18; SESN2; PTAFR; EYA3; RPA2; STX12; FAM76A; IFI6; FGR; WASF2; GPR3; CD164L2; FCN3; MAP3K6; SYTL1; TMEM222; WDTC1; SLC9A1; FAM46B; KDF1; NR0B2; GPATCH3; GPN2; NIPAL3; GRHL3; PLEKHM2; KAZN; KIFC3; GINS3; STIM2; CACNA2D1; CNTNAP2; PLN; TIMP2; SNX11; ANKFN1; BCAS3; PPM1D; APPBP2; CA4; GGNBP2; TMEM132E; CCL13; NF1; SRRM3; MYH11; NDE1; TEKT5; PDS5B; PTPN18; ALCAM;…
autonomic ganglia	2	736	2.43902	0.640361	0.826841	1	1	1	TIMP2; NF1;
meninges	3	447	3.65854	1.57893	0.297541	1	1	1	RCC1; KAZN; FZR1;
kidney	57	13456	69.5122	0.993453	0.589871	1	1	1	PML; LOXL1; TBC1D21; RCC1; PHACTR4; MED18; SESN2; DNAJC8; PTAFR; EYA3; RPA2; FAM76A; FGR; FCN3; MAP3K6; TMEM222; WDTC1; SLC9A1; FAM46B; KDF1; GPN2; NIPAL3; STPG1; GRHL3; PLEKHM2; KAZN; KIFC3; GINS3; STIM2; CACNA2D1; CNTNAP2; CEP85L; CBX1; SNX11; ANKFN1; BCAS3; PPM1D; APPBP2; CA4; GGNBP2; LHX1; AATF; TMEM132E; CCL2; NF1; MYH11; NDE1; TEKT5; PDS5B; PTPN18; ALCAM; SRPK1; UPK3A; WNT7B; MTHFD1L; NFIC;…
endometrium	58	12807	70.7317	1.06211	0.251296	1	1	1	EMX2; PML; STOML1; LOXL1; TBC1D21; PHACTR4; MED18; SESN2; PTAFR; RPA2; THEMIS2; FAM76A; FGR; WASF2; GPR3; CD164L2; FCN3; MAP3K6; SYTL1; TMEM222; WDTC1; SLC9A1; KDF1; NUDC; GPATCH3; GPN2; NIPAL3; STPG1; PLEKHM2; KAZN; KIFC3; GINS3; STIM2; CACNA2D1; CNTNAP2; TIMP2; CDC42EP4; SNX11; ANKFN1; APPBP2; GGNBP2; LHX1; AATF; TMEM132E; NF1; MYH11; TEKT5; PDS5B; PTPN18; ALCAM; ARMC12; LHFPL5; SRPK1; FAM118A;…
stomach	5	1289	6.09756	0.911369	0.650552	1	1	1	SESN2; MAP3K6; CNTNAP2; CEP85L; ALCAM;
large intestine	81	17427	98.7805	1.09	0.00291717	0.122521	0.122521	0.36642	EMX2; PML; STOML1; LOXL1; TBC1D21; RCC1; PHACTR4; MED18; SESN2; ATPIF1; DNAJC8; PTAFR; EYA3; RPA2; THEMIS2; STX12; FAM76A; IFI6; FGR; WASF2; GPR3; CD164L2; FCN3; MAP3K6; SYTL1; TMEM222; WDTC1; SLC9A1; FAM46B; KDF1; NUDC; NR0B2; GPATCH3; GPN2; NIPAL3; STPG1; GRHL3; PLEKHM2; KAZN; KIFC3; GINS3; CHIC2; STIM2; CACNA2D1; CNTNAP2; CEP85L; PLN; TIMP2; CDC42EP4; CBX1; SNX11; ANKFN1; BCAS3; PPM1D; APPBP2;…
soft tissue	1	186	1.21951	1.2732	0.550081	1	1	1	NF1;
central nervous system	52	12014	63.4146	1.01511	0.479161	1	1	1	PML; LOXL1; RCC1; PHACTR4; SESN2; PTAFR; EYA3; RPA2; STX12; IFI6; WASF2; MAP3K6; SYTL1; WDTC1; SLC9A1; FAM46B; NUDC; NR0B2; GPN2; STPG1; GRHL3; PLEKHM2; KAZN; KIFC3; CHIC2; STIM2; CACNA2D1; CNTNAP2; TIMP2; CDC42EP4; CBX1; SNX11; ANKFN1; BCAS3; PPM1D; APPBP2; GGNBP2; LHX1; TMEM132E; CCL13; CCL2; NF1; MYH11; TEKT5; PDS5B; PTPN18; ALCAM; SRPK1; FAM118A; MTHFD1L; NFIC; FZR1;
eye	2	461	2.43902	1.02235	0.58844	1	1	1	SESN2; CHIC2;
ovary	50	12007	60.9756	0.97664	0.653996	1	1	1	EMX2; PML; STOML1; LOXL1; TBC1D21; RCC1; PHACTR4; SESN2; EYA3; RPA2; THEMIS2; IFI6; WASF2; GPR3; FCN3; MAP3K6; SYTL1; WDTC1; SLC9A1; KDF1; NUDC; GPATCH3; STPG1; GRHL3; PLEKHM2; KAZN; KIFC3; CACNA2D1; CNTNAP2; CEP85L; ANKFN1; BCAS3; CA4; GGNBP2; LHX1; AATF; TMEM132E; NF1; SRRM3; MYH11; NDE1; TEKT5; PDS5B; PTPN18; ALCAM; ARMC12; SRPK1; WNT7B; MTHFD1L; FZR1;
bone	2	1330	2.43902	0.354367	0.980296	1	1	1	ARMC12; WNT7B;
240 NB cases mutantgeneList	13	3941	15.8537	0.774074	0.883675	1	1	1	RCC1; WASF2; SLC9A1; KDF1; KIFC3; CNTNAP2; BCAS3; TMEM132E; NF1; MYH11; PDS5B; FAM118A; FZR1;
haematopoietic and lymphoid tissue	34	8977	41.4634	0.888357	0.85557	1	1	1	EMX2; PML; STOML1; SESN2; PTAFR; THEMIS2; FGR; FCN3; SYTL1; SLC9A1; FAM46B; KDF1; NUDC; GPN2; PLEKHM2; KAZN; STIM2; CACNA2D1; CNTNAP2; CEP85L; ANKFN1; BCAS3; PPM1D; LHX1; TMEM132E; CCL1; NF1; MYH11; NDE1; PDS5B; SRPK1; WNT7B; NFIC; FZR1;
breast	60	14924	73.1707	0.942868	0.863261	1	1	1	PML; STOML1; TBC1D21; RCC1; PHACTR4; MED18; ATPIF1; DNAJC8; PTAFR; EYA3; STX12; FAM76A; FGR; WASF2; GPR3; CD164L2; FCN3; MAP3K6; SYTL1; WDTC1; SLC9A1; FAM46B; NUDC; GPATCH3; GPN2; STPG1; GRHL3; PLEKHM2; KIFC3; GINS3; CHIC2; STIM2; CACNA2D1; CNTNAP2; CEP85L; TIMP2; CDC42EP4; CBX1; SNX11; ANKFN1; BCAS3; PPM1D; APPBP2; GGNBP2; LHX1; AATF; TMEM132E; CCL13; CCL2; NF1; MYH11; NDE1; TEKT5; PDS5B; ALCAM;…
upper aerodigestive tract	23	6364	28.0488	0.84781	0.862947	1	1	1	GPR3; MAP3K6; SYTL1; KDF1; GPATCH3; GRHL3; KAZN; CACNA2D1; CNTNAP2; CEP85L; TIMP2; ANKFN1; BCAS3; PPM1D; GGNBP2; NF1; MYH11; NDE1; TEKT5; PDS5B; ARMC12; FAM118A; NFIC;
cervix	16	2590	19.5122	1.44945	0.0791166	1	1	1	PML; SESN2; WASF2; SLC9A1; PLEKHM2; GINS3; CACNA2D1; CNTNAP2; CDC42EP4; SNX11; AATF; TMEM132E; NF1; SRRM3; TEKT5; ALCAM;
thyroid	39	8760	47.561	1.0442	0.398414	1	1	1	EMX2; PML; LOXL1; PHACTR4; MED18; DNAJC8; PTAFR; FAM76A; CD164L2; MAP3K6; SYTL1; WDTC1; KDF1; NR0B2; STPG1; PLEKHM2; KAZN; KIFC3; CHIC2; CACNA2D1; CNTNAP2; CDC42EP4; CA4; GGNBP2; LHX1; TMEM132E; NF1; SRRM3; MYH11; TEKT5; PTPN18; ALCAM; ARMC12; SRPK1; UPK3A; FAM118A; MTHFD1L; NFIC; FZR1;
liver	57	14176	69.5122	0.942996	0.839813	1	1	1	PML; STOML1; LOXL1; PTAFR; EYA3; THEMIS2; STX12; FGR; GPR3; CD164L2; FCN3; MAP3K6; SYTL1; TMEM222; WDTC1; SLC9A1; FAM46B; KDF1; NUDC; NR0B2; NIPAL3; STPG1; GRHL3; PLEKHM2; KAZN; KIFC3; GINS3; STIM2; CACNA2D1; CNTNAP2; CEP85L; CDC42EP4; SNX11; ANKFN1; BCAS3; PPM1D; APPBP2; CA4; GGNBP2; LHX1; AATF; TMEM132E; CCL13; NF1; SRRM3; MYH11; TEKT5; PDS5B; ALCAM; ARMC12; CLPS; LHFPL5; SRPK1; WNT7B; MTHFD1L;…
pancreas	59	12286	71.9512	1.12623	0.0777415	1	1	1	EMX2; PML; LOXL1; TBC1D21; PHACTR4; SESN2; PTAFR; EYA3; RPA2; THEMIS2; STX12; FAM76A; FGR; CD164L2; FCN3; MAP3K6; SYTL1; TMEM222; WDTC1; SLC9A1; KDF1; NR0B2; GPATCH3; NIPAL3; STPG1; GRHL3; PLEKHM2; KAZN; KIFC3; STIM2; CACNA2D1; CNTNAP2; TIMP2; CDC42EP4; ANKFN1; BCAS3; PPM1D; APPBP2; CA4; LHX1; AATF; TMEM132E; CCL2; NF1; SRRM3; MYH11; NDE1; TEKT5; PDS5B; PTPN18; ALCAM; ARMC12; CLPS; LHFPL5; FAM118…
neuroblastoma	2	744	2.43902	0.633476	0.831442	1	1	1	TIMP2; NF1;
oesophagus	23	5660	28.0488	0.953262	0.649006	1	1	1	PML; TBC1D21; FGR; WASF2; MAP3K6; SYTL1; WDTC1; SLC9A1; NR0B2; KIFC3; CNTNAP2; PPM1D; CA4; AATF; TMEM132E; CCL2; NF1; MYH11; NDE1; PDS5B; ALCAM; ARMC12; WNT7B;
adrenal gland	1	53	1.21951	4.46762	0.202913	1	1	1	NF1;
urinary tract	60	13085	73.1707	1.07538	0.190634	1	1	1	EMX2; PML; STOML1; LOXL1; TBC1D21; PHACTR4; SESN2; PTAFR; EYA3; FAM76A; FGR; WASF2; CD164L2; FCN3; MAP3K6; SYTL1; WDTC1; SLC9A1; FAM46B; KDF1; NUDC; GPN2; STPG1; GRHL3; PLEKHM2; KAZN; KIFC3; STIM2; CACNA2D1; CNTNAP2; CEP85L; TIMP2; CDC42EP4; CBX1; SNX11; ANKFN1; BCAS3; PPM1D; APPBP2; CA4; GGNBP2; LHX1; AATF; TMEM132E; CCL1; CCL13; NF1; MYH11; NDE1; TEKT5; PDS5B; ALCAM; ARMC12; LHFPL5; UPK3A; FAM1…
small intestine	1	196	1.21951	1.20825	0.569087	1	1	1	PDS5B;
salivary gland	1	555	1.21951	0.42671	0.909877	1	1	1	APPBP2;
