# Supplementary material for: Genome-Wide Signatures of Selection Reveal Genes Associated With Performance in American Quarter Horse Subpopulations
Source: Front Genet. 2018 Jul 19;9:249. doi: 10.3389/fgene.2018.00249 (PMC6060370; doi:10.3389/fgene.2018.00249)
Supplement: Supplementary Table 11 — FunRich3.0 functional enrichment and pathway analysis results for the racing QH subpopulation. [file Table_11.XLSX]

## Sheet: Dataset(Racing)
Name of dataset: Racing
No. of identified items: 161 of 170
No. of unidentified items: 9
ID type: GeneSymbol
Number of mapped gene: 161
Is dataset quantitative :NO
Mapped items:
Dataset item (Gene symbol )		Entrez ID	Gene symbol	Description	Alternate names	Chromosome	Map location
NRL		4901	NRL	neural retina leucine zipper	D14S46E|NRL-MAF|RP27	14	14q11.1-q11.2
PCK2		5106	PCK2	phosphoenolpyruvate carboxykinase 2 (mitochondrial)	PEPCK|PEPCK-M|PEPCK2	14	14q11.2
DCAF11		80344	DCAF11	DDB1 and CUL4 associated factor 11	GL014|PRO2389|WDR23	14	14q11.2
SGMS1		259230	SGMS1	sphingomyelin synthase 1	MOB|MOB1|SMS1|TMEM23|hmob33	10	10q11.2
COX5A		9377	COX5A	cytochrome c oxidase subunit Va	COX|COX-VA|VA	15	15q24.1
SEMA7A		8482	SEMA7A	semaphorin 7A, GPI membrane anchor (John Milton Hagen blood group)	CD108|CDw108|H-SEMA-K1|H-Sema-L|JMH|SEMAK1|SEMAL	15	15q22.3-q23
ATAD1		84896	ATAD1	ATPase family, AAA domain containing 1	AFDC1|FNP001|THORASE	10	10q23.31
SEC23IP		11196	SEC23IP	SEC23 interacting protein	MSTP053|P125|P125A	10	10q25-q26
ZWINT		11130	ZWINT	ZW10 interacting kinetochore protein	HZwint-1|KNTC2AP|SIP30|ZWINT1	10	10q21-q22
CHRNB4		1143	CHRNB4	cholinergic receptor, nicotinic, beta 4 (neuronal)	-	15	15q24
NEIL1		79661	NEIL1	nei-like DNA glycosylase 1	FPG1|NEI1|hFPG1	15	15q24.2
C15orf59		388135	C15orf59	chromosome 15 open reading frame 59	-	15	15q24.1
ETFA		2108	ETFA	electron-transfer-flavoprotein, alpha polypeptide	EMA|GA2|MADD	15	15q23-q25
PSTPIP1		9051	PSTPIP1	proline-serine-threonine phosphatase interacting protein 1	CD2BP1|CD2BP1L|CD2BP1S|H-PIP|PAPAS|PSTPIP	15	15q24.3
BBS4		585	BBS4	Bardet-Biedl syndrome 4	-	15	15q22.3-q23
RPP25		54913	RPP25	ribonuclease P/MRP 25kDa subunit	-	15	15q24.2
ISLR		3671	ISLR	immunoglobulin superfamily containing leucine-rich repeat	HsT17563	15	15q23-q24
PRLHR		2834	PRLHR	prolactin releasing hormone receptor	GPR10|GR3|PrRPR	10	10q26.13
SENP8		123228	SENP8	SUMO/sentrin peptidase family member, NEDD8 specific	DEN1|NEDP1|PRSC2	15	15q23
PML		5371	PML	promyelocytic leukemia	MYL|PP8675|RNF71|TRIM19	15	15q22
CSTF2T		23283	CSTF2T	cleavage stimulation factor, 3' pre-RNA, subunit 2, 64kDa, tau variant	CstF-64T	10	10q11
BAG3		9531	BAG3	BCL2-associated athanogene 3	BAG-3|BIS|CAIR-1|MFM6	10	10q25.2-q26.2
WDR61		80349	WDR61	WD repeat domain 61	REC14|SKI8	15	15q25.1
LINGO1		84894	LINGO1	leucine rich repeat and Ig domain containing 1	LERN1|LRRN6A|UNQ201	15	15q24.3
CPLX3		594855	CPLX3	complexin 3	CPX-III|CPXIII|Nbla11589	15	15q24.1
HYKK		123688	HYKK	hydroxylysine kinase	AGPHD1	15	15q25.1
PKM		5315	PKM	pyruvate kinase, muscle	CTHBP|HEL-S-30|OIP3|PK3|PKM2|TCB|THBP1	15	15q22
NPTN		27020	NPTN	neuroplastin	GP55|GP65|SDFR1|SDR1|np55|np65	15	15q22
CYP1A2		1544	CYP1A2	cytochrome P450, family 1, subfamily A, polypeptide 2	CP12|P3-450|P450(PA)	15	15q24.1
PAPSS2		9060	PAPSS2	3'-phosphoadenosine 5'-phosphosulfate synthase 2	ATPSK2|BCYM4|SK2	10	10q24
ODF3L1		161753	ODF3L1	outer dense fiber of sperm tails 3-like 1	-	15	15q24.2
LMAN1L		79748	LMAN1L	lectin, mannose-binding, 1 like	ERGIC-53L|ERGL	15	15q24.1
ISL2		64843	ISL2	ISL LIM homeobox 2	-	15	15q23
UBE2Q2		92912	UBE2Q2	ubiquitin-conjugating enzyme E2Q family member 2	-	15	15q24.2
PSMA4		5685	PSMA4	proteasome (prosome, macropain) subunit, alpha type, 4	HC9|HsT17706|PSC9	15	15q25.1
FAM219B		57184	FAM219B	family with sequence similarity 219, member B	C15orf17	15	15q24.1
TIAL1		7073	TIAL1	TIA1 cytotoxic granule-associated RNA binding protein-like 1	TCBP|TIAR	10	10q
CHRNA3		1136	CHRNA3	cholinergic receptor, nicotinic, alpha 3 (neuronal)	LNCR2|NACHRA3|PAOD2	15	15q24
A1CF		29974	A1CF	APOBEC1 complementation factor	ACF|ACF64|ACF65|APOBEC1CF|ASP	10	10q11.23
TMEM202		338949	TMEM202	transmembrane protein 202	-	15	15q24.1
CSPG4		1464	CSPG4	chondroitin sulfate proteoglycan 4	HMW-MAA|MCSP|MCSPG|MEL-CSPG|MSK16|NG2	15	15q24.2
MPI		4351	MPI	mannose phosphate isomerase	CDG1B|PMI|PMI1	15	15q24.1
SLIT1		6585	SLIT1	slit guidance ligand 1	MEGF4|SLIL1|SLIT-1|SLIT3	10	10q23.3-q24
CCDC33		80125	CCDC33	coiled-coil domain containing 33	CT61	15	15q24.1
MINPP1		9562	MINPP1	multiple inositol-polyphosphate phosphatase 1	HIPER1|MINPP2|MIPP	10	10q23
ARID3B		10620	ARID3B	AT rich interactive domain 3B (BRIGHT-like)	BDP|DRIL2	15	15q24
CACUL1		143384	CACUL1	CDK2-associated, cullin domain 1	C10orf46|CAC1	10	10q26.11
CSK		1445	CSK	c-src tyrosine kinase	-	15	15q24.1
FAM45A		404636	FAM45A	family with sequence similarity 45, member A	-	10	10q25
CYP1A1		1543	CYP1A1	cytochrome P450, family 1, subfamily A, polypeptide 1	AHH|AHRR|CP11|CYP1|P1-450|P450-C|P450DX	15	15q24.1
TSPAN3		10099	TSPAN3	tetraspanin 3	TM4-A|TM4SF8|TSPAN-3	15	15q24.3
PRKG1		5592	PRKG1	protein kinase, cGMP-dependent, type I	AAT8|PKG|PRKG1B|PRKGR1B|cGK|cGK 1|cGK1|cGKI|cGKI-BETA|cGKI-alpha	10	10q11.2
UBL7		84993	UBL7	ubiquitin-like 7	BMSC-UbP|TCBA1	15	15q24.1
COMMD4		54939	COMMD4	COMM domain containing 4	-	15	15q24.2
INPP5F		22876	INPP5F	inositol polyphosphate-5-phosphatase F	MSTP007|MSTPO47|SAC2|hSAC2	10	10q26.11
MCMBP		79892	MCMBP	minichromosome maintenance complex binding protein	C10orf119|MCM-BP	10	10q26.11
NR2E3		10002	NR2E3	nuclear receptor subfamily 2, group E, member 3	ESCS|PNR|RNR|RP37|rd7	15	15q23
SCAMP2		10066	SCAMP2	secretory carrier membrane protein 2	-	15	15q23-q25
SNX33		257364	SNX33	sorting nexin 33	SH3PX3|SH3PXD3C|SNX30	15	15q24.2
CRABP1		1381	CRABP1	cellular retinoic acid binding protein 1	CRABP|CRABP-I|CRABPI|RBP5	15	15q24
PARP6		56965	PARP6	poly (ADP-ribose) polymerase family, member 6	ARTD17|PARP-6-B1|PARP-6-C|pART17	15	15q23
MYO9A		4649	MYO9A	myosin IXA	-	15	15q22-q23
RCN2		5955	RCN2	reticulocalbin 2, EF-hand calcium binding domain	E6BP|ERC-55|ERC55|TCBP49	15	15q23
IREB2		3658	IREB2	iron-responsive element binding protein 2	ACO3|IRP2|IRP2AD	15	15q25.1
STRA6		64220	STRA6	stimulated by retinoic acid 6	MCOPCB8|MCOPS9|PP14296	15	15q24.1
PTEN		5728	PTEN	phosphatase and tensin homolog	10q23del|BZS|CWS1|DEC|GLM2|MHAM|MMAC1|PTEN1|TEP1	10	10q23.3
PRDX3		10935	PRDX3	peroxiredoxin 3	AOP-1|AOP1|HBC189|MER5|PRO1748|SP-22|prx-III	10	10q25-q26
CYP11A1		1583	CYP11A1	cytochrome P450, family 11, subfamily A, polypeptide 1	CYP11A|CYPXIA1|P450SCC	15	15q23-q24
SNUPN		10073	SNUPN	snurportin 1	KPNBL|RNUT1|Snurportin1	15	15q24.2
C15orf39		56905	C15orf39	chromosome 15 open reading frame 39	-	15	15q24.2
DKK1		22943	DKK1	dickkopf WNT signaling pathway inhibitor 1	DKK-1|SK	10	10q11.2
EDC3		80153	EDC3	enhancer of mRNA decapping 3	LSM16|YJDC|YJEFN2	15	15q24.1
FAM204A		63877	FAM204A	family with sequence similarity 204, member A	C10orf84|bA319I23.1	10	10q26.11
PPCDC		60490	PPCDC	phosphopantothenoylcysteine decarboxylase	MDS018|PPC-DC|coaC	15	15q24.2
ARIH1		25820	ARIH1	ariadne RBR E3 ubiquitin protein ligase 1	ARI|HARI|HHARI|UBCH7BP	15	15q24
STOML1		9399	STOML1	stomatin (EPB72)-like 1	SLP-1|STORP|hUNC-24	15	15q24.1
RAB11FIP2		22841	RAB11FIP2	RAB11 family interacting protein 2 (class I)	Rab11-FIP2|nRip11	10	10q26.11
ADPGK		83440	ADPGK	ADP-dependent glucokinase	2610017G09Rik|ADP-GK	15	15q24.1
SCAMP5		192683	SCAMP5	secretory carrier membrane protein 5	-	15	15q24.2
NRG4		145957	NRG4	neuregulin 4	HRG4	15	15q24.2
ULK3		25989	ULK3	unc-51 like kinase 3	-	15	15q24.1
CHRNA5		1138	CHRNA5	cholinergic receptor, nicotinic, alpha 5 (neuronal)	LNCR2	15	15q24
SCAPER		49855	SCAPER	S-phase cyclin A-associated protein in the ER	MSTP063|ZNF291|Zfp291	15	15q24
MAN2C1		4123	MAN2C1	mannosidase, alpha, class 2C, member 1	MAN6A8|MANA|MANA1	15	15q24.2
EIF3A		8661	EIF3A	eukaryotic translation initiation factor 3, subunit A	EIF3|EIF3S10|P167|TIF32|eIF3-p170|eIF3-theta|p180|p185	10	10q26
PTPN9		5780	PTPN9	protein tyrosine phosphatase, non-receptor type 9	MEG2|PTPMEG2	15	15q24.2
CLK3		1198	CLK3	CDC-like kinase 3	PHCLK3|PHCLK3/152	15	15q24
PEAK1		79834	PEAK1	pseudopodium-enriched atypical kinase 1	SGK269	15	15q24.3
LOXL1		4016	LOXL1	lysyl oxidase-like 1	LOL|LOXL	15	15q22
RGS10		6001	RGS10	regulator of G-protein signaling 10	-	10	10q25
GRK5		2869	GRK5	G protein-coupled receptor kinase 5	GPRK5	10	10q26.11
DNAJA4		55466	DNAJA4	DnaJ (Hsp40) homolog, subfamily A, member 4	MST104|MSTP104|PRO1472	15	15q25.1
LRRC49		54839	LRRC49	leucine rich repeat containing 49	PGs4	15	15q23
SIN3A		25942	SIN3A	SIN3 transcription regulator family member A	-	15	15q24.2
NEO1		4756	NEO1	neogenin 1	IGDCC2|NGN|NTN1R2	15	15q22.3-q23
TBC1D21		161514	TBC1D21	TBC1 domain family, member 21	MgcRabGAP	15	15q24.1
HECW1		23072	HECW1	HECT, C2 and WW domain containing E3 ubiquitin protein ligase 1	NEDL1	7	7p13
STK17A		9263	STK17A	serine/threonine kinase 17a	DRAK1	7	7p13
COA1		55744	COA1	cytochrome c oxidase assembly factor 1 homolog	C7orf44|MITRAC15	7	7p13
VWC2		375567	VWC2	von Willebrand factor C domain containing 2	PSST739|UNQ739	7	7p12.2
ZPBP		11055	ZPBP	zona pellucida binding protein	ZPBP1	7	7p14.3
PCLO		27445	PCLO	piccolo presynaptic cytomatrix protein	ACZ|PCH3	7	7q21.11
ST7L		54879	ST7L	suppression of tumorigenicity 7 like	FAM4B|ST7R|STLR	1	1p13.2
DDX11		1663	DDX11	DEAD/H (Asp-Glu-Ala-Asp/His) box helicase 11	CHL1|CHLR1|KRG2|WABS	12	12p11
TSPAN9		10867	TSPAN9	tetraspanin 9	NET-5|NET5|PP1057	12	12p13.33-p13.32
GOLT1B		51026	GOLT1B	golgi transport 1B	CGI-141|GCT2|GOT1|GOT1B|YMR292W	12	12p12.1
ABCC9		10060	ABCC9	ATP-binding cassette, sub-family C (CFTR/MRP), member 9	ABC37|ATFB12|CANTU|CMD1O|SUR2	12	12p12.1
CNTN1		1272	CNTN1	contactin 1	F3|GP135|MYPCN	12	12q11-q12
RAB35		11021	RAB35	RAB35, member RAS oncogene family	H-ray|RAB1C|RAY	12	12q24.31
MLXIP		22877	MLXIP	MLX interacting protein	MIR|MONDOA|bHLHe36	12	12q24.31
IL31		386653	IL31	interleukin 31	IL-31	12	12q24.31
LRRC43		254050	LRRC43	leucine rich repeat containing 43	-	12	12q24.31
CLIP1		6249	CLIP1	CAP-GLY domain containing linker protein 1	CLIP|CLIP-170|CLIP170|CYLN1|RSN	12	12q24.3
RILPL2		196383	RILPL2	Rab interacting lysosomal protein-like 2	RLP2	12	12q24.31
TMEM71		137835	TMEM71	transmembrane protein 71	-	8	8q24.22
SYT3		84258	SYT3	synaptotagmin III	SytIII	19	19q13.33
MEI4		101928601	MEI4	meiotic double-stranded break formation protein 4	-	6	-
RRAGD		58528	RRAGD	Ras-related GTP binding D	RAGD|bA11D8.2.1	6	6q15
ANKRD6		22881	ANKRD6	ankyrin repeat domain 6	-	6	6q15
PRPSAP1		5635	PRPSAP1	phosphoribosyl pyrophosphate synthetase-associated protein 1	PAP39	17	17q24-q25
GPR142		350383	GPR142	G protein-coupled receptor 142	PGR2	17	17q25.1
PRKCA		5578	PRKCA	protein kinase C, alpha	AAG6|PKC-alpha|PKCA|PRKACA	17	17q22-q23.2
TANC2		26115	TANC2	tetratricopeptide repeat, ankyrin repeat and coiled-coil containing 2	ROLSA|rols	17	17q23.3
TMEM98		26022	TMEM98	transmembrane protein 98	TADA1	17	17q11.2
NTN1		9423	NTN1	netrin 1	NTN1L	17	17p13.1
PDHX		8050	PDHX	pyruvate dehydrogenase complex, component X	DLDBP|E3BP|OPDX|PDX1|proX	11	11p13
ABLIM3		22885	ABLIM3	actin binding LIM protein family, member 3	HMFN1661	5	5q32
SPOCK1		6695	SPOCK1	sparc/osteonectin, cwcv and kazal-like domains proteoglycan (testican) 1	SPOCK|TESTICAN|TIC1	5	5q31.2
YTHDC2		64848	YTHDC2	YTH domain containing 2	CAHL	5	5q22.2
CIB4		130106	CIB4	calcium and integrin binding family member 4	KIP4	2	2p23.3
C2orf70		339778	C2orf70	chromosome 2 open reading frame 70	-	2	2p23.3
KLHL29		114818	KLHL29	kelch-like family member 29	KBTBD9	2	2p24.1
MGAT5		4249	MGAT5	mannosyl (alpha-1,6-)-glycoprotein beta-1,6-N-acetyl-glucosaminyltransferase	GNT-V|GNT-VA	2	2q21.3
PKP4		8502	PKP4	plakophilin 4	p0071	2	2q24.1
HSPD1		3329	HSPD1	heat shock 60kDa protein 1 (chaperonin)	CPN60|GROEL|HLD4|HSP-60|HSP60|HSP65|HuCHA60|SPG13	2	2q33.1
HSPE1		3336	HSPE1	heat shock 10kDa protein 1	CPN10|EPF|GROES|HSP10	2	2q33.1
CASP8		841	CASP8	caspase 8, apoptosis-related cysteine peptidase	ALPS2B|CAP4|Casp-8|FLICE|MACH|MCH5	2	2q33-q34
ALS2CR12		130540	ALS2CR12	amyotrophic lateral sclerosis 2 (juvenile) chromosome region, candidate 12	-	2	2q33.1
MRPS36		92259	MRPS36	mitochondrial ribosomal protein S36	DC47|MRP-S36	5	5q13.2
CENPH		64946	CENPH	centromere protein H	-	5	5p15.2
CCNB1		891	CCNB1	cyclin B1	CCNB	5	5q12
INVS		27130	INVS	inversin	INV|NPH2|NPHP2	9	9q31
PTGES		9536	PTGES	prostaglandin E synthase	MGST-IV|MGST1-L1|MGST1L1|MPGES|PGES|PIG12|PP102|PP1294|TP53I12|mPGES-1	9	9q34.3
LCN15		389812	LCN15	lipocalin 15	PRO6093|UNQ2541	9	9q34.3
RABL6		55684	RABL6	RAB, member RAS oncogene family-like 6	C9orf86|PARF|RBEL1|pp8875	9	9q34.3
PACSIN2		11252	PACSIN2	protein kinase C and casein kinase substrate in neurons 2	SDPII	22	22q13.2-q13.33
ZC3H12C		85463	ZC3H12C	zinc finger CCCH-type containing 12C	MCPIP3	11	11q22.3
RDX		5962	RDX	radixin	DFNB24	11	11q23
ACER3		55331	ACER3	alkaline ceramidase 3	APHC|PHCA	11	11q13.5
TSKU		25987	TSKU	tsukushi, small leucine rich proteoglycan	E2IG4|LRRC54|TSK	11	11q13.5
C11orf53		341032	C11orf53	chromosome 11 open reading frame 53	-	11	11q23.1
COLCA2		120376	COLCA2	colorectal cancer associated 2	C11orf93|CASC13	11	11q23.1
POLR2E		5434	POLR2E	polymerase (RNA) II (DNA directed) polypeptide E, 25kDa	RPABC1|RPB5|XAP4|hRPB25|hsRPB5	19	19p13.3
POU2AF1		5450	POU2AF1	POU class 2 associating factor 1	BOB1|OBF-1|OBF1|OCAB	11	11q23.1
ST3GAL4		6484	ST3GAL4	ST3 beta-galactoside alpha-2,3-sialyltransferase 4	CGS23|NANTA3|SAT3|SIAT4|SIAT4C|ST3GalIV|STZ	11	11q24.2
RPS28		6234	RPS28	ribosomal protein S28	DBA15|S28	19	19p13.2
FDX1		2230	FDX1	ferredoxin 1	ADX|FDX|LOH11CR1D	11	11q22
B3GNT6		192134	B3GNT6	UDP-GlcNAc:betaGal beta-1,3-N-acetylglucosaminyltransferase 6	B3Gn-T6|BGnT-6|beta-1,3-Gn-T6|beta3Gn-T6	11	11q13.4
LRRC32		2615	LRRC32	leucine rich repeat containing 32	D11S833E|GARP	11	11q13.5-q14
ARHGAP20		57569	ARHGAP20	Rho GTPase activating protein 20	RARHOGAP	11	11q23.1
KIRREL3		84623	KIRREL3	kin of IRRE like 3 (Drosophila)	KIRRE|MRD4|NEPH2|PRO4502	11	11q24

## Sheet: Cellular component
Analysis: Cellular component
Dataset name: Racing
Number of genes in the dataset: 161
Number of genes in the dataset (which are available in Cellular component database) :127
Number of genes in background: 19230
Is analysis quantitative: No
						Corrected p-values
Cellular component	No. of genes in the dataset	No.of genes in the background dataset	Percentage of genes	Fold enrichment	P-value (Hypergeometric test)	Bonferroni method	BH method	Q-value (Storey-Tibshirani method)
Plasma membrane	37	3479	22.9814	1.27055	0.0678853	1	1	1	SGMS1; SEMA7A; CHRNB4; PSTPIP1; ISLR; PRLHR; LINGO1; NPTN; CHRNA3; CSPG4; CSK; SCAMP2; PTEN; DKK1; STOML1; RAB11FIP2; SCAMP5; CHRNA5; RGS10; GRK5; DNAJA4; NEO1; TSPAN9; ABCC9; CNTN1; RAB35; SYT3; PRKCA; PKP4; HSPD1; CCNB1; INVS; RDX; POU2AF1; ST3GAL4; LRRC32; KIRREL3;
ER-Golgi intermediate compartment	1	30	0.621118	4.01959	0.223081	1	1	1	SEC23IP;
Integral to membrane	18	1702	11.1801	1.2638	0.180425	1	1	1	CHRNB4; LMAN1L; CHRNA3; TSPAN3; SCAMP2; STRA6; SCAMP5; NRG4; ZPBP; ST7L; IL31; SYT3; GPR142; TMEM98; MGAT5; PTGES; ST3GAL4; B3GNT6;
Integral to plasma membrane	5	934	3.10559	0.640638	0.896421	1	1	1	PRLHR; CSPG4; NEO1; TSPAN9; LRRC32;
Golgi aparatus	10	897	6.21118	1.3328	0.21984	1	1	1	SGMS1; SEC23IP; PRKG1; SCAMP2; SCAMP5; MGAT5; HSPD1; RDX; ACER3; ST3GAL4;
Nucleus	49	5847	30.4348	1.0011	0.52666	1	1	1	NRL; SGMS1; ATAD1; SEC23IP; ZWINT; NEIL1; RPP25; PML; CSTF2T; PKM; PAPSS2; ISL2; UBE2Q2; PSMA4; TIAL1; A1CF; MINPP1; ARID3B; CYP1A1; PRKG1; NR2E3; PARP6; MYO9A; PTEN; SNUPN; ARIH1; ADPGK; SCAPER; MAN2C1; CLK3; LOXL1; RGS10; GRK5; SIN3A; HECW1; STK17A; DDX11; MLXIP; RRAGD; PRKCA; YTHDC2; PKP4; CASP8; CENPH; CCNB1; INVS; RABL6; POLR2E; POU2AF1;
Nucleolus	9	1257	5.59006	0.856077	0.732638	1	1	1	RPP25; PML; DDX11; HSPD1; HSPE1; CASP8; CCNB1; POLR2E; RPS28;
Mitochondrion	12	1259	7.45342	1.13931	0.363903	1	1	1	PCK2; COX5A; ATAD1; ETFA; PRDX3; CYP11A1; PDHX; HSPD1; HSPE1; CASP8; MRPS36; FDX1;
Cytosolic small ribosomal subunit	1	36	0.621118	3.34985	0.261364	1	1	1	RPS28;
Cytosol	12	1178	7.45342	1.21765	0.283001	1	1	1	PCK2; BAG3; PKM; CSK; PTEN; SNUPN; EIF3A; PRKCA; HSPD1; CASP8; CCNB1; RPS28;
Ribosome	1	144	0.621118	0.837636	0.70336	1	1	1	RPS28;
Membrane fraction	5	346	3.10559	1.72932	0.165309	1	1	1	TSPAN9; CNTN1; PRKCA; CASP8; PTGES;
Cytoplasm	55	5684	34.1615	1.15588	0.116169	1	1	1	NRL; SEC23IP; ZWINT; NEIL1; PSTPIP1; SENP8; PML; CSTF2T; BAG3; PKM; PAPSS2; UBE2Q2; PSMA4; TIAL1; A1CF; MPI; MINPP1; CSK; COMMD4; SCAMP2; CRABP1; MYO9A; IREB2; PTEN; PRDX3; SNUPN; EDC3; ARIH1; RAB11FIP2; ADPGK; MAN2C1; EIF3A; PTPN9; RGS10; GRK5; SIN3A; HECW1; PCLO; CNTN1; RAB35; MLXIP; CLIP1; RRAGD; PRPSAP1; PRKCA; ABLIM3; PKP4; HSPD1; CASP8; CCNB1; PACSIN2; RDX; POU2AF1; ARHGAP20; KIRREL3;
Exosomes	22	2043	13.6646	1.2867	0.130837	1	1	1	ETFA; PKM; PSMA4; CSPG4; CSK; TSPAN3; SCAMP2; SNX33; PRDX3; ULK3; EIF3A; TBC1D21; PCLO; DDX11; ABCC9; RAB35; PRKCA; HSPD1; HSPE1; PACSIN2; RDX; RPS28;
Perinuclear region	3	131	1.86335	2.74403	0.0975434	1	1	1	PKM; PRKG1; PRKCA;
Lysosome	20	1620	12.4224	1.47522	0.0511782	1	1	1	SEMA7A; ATAD1; ETFA; PKM; PSMA4; TIAL1; TSPAN3; COMMD4; SCAMP2; RCN2; STRA6; PRDX3; CYP11A1; ADPGK; EIF3A; PTPN9; TSPAN9; GOLT1B; RAB35; ST3GAL4;
Endoplasmic reticulum	14	1104	8.69565	1.51563	0.0797038	1	1	1	SGMS1; SEC23IP; CYP1A2; PSMA4; MINPP1; CYP1A1; RCN2; STRA6; SCAMP5; GOLT1B; PRKCA; TMEM98; HSPD1; ACER3;
Secretory granule	3	50	1.86335	7.18847	0.00846542	1	0.829611	1	SCAMP2; CNTN1; HSPD1;
Endosome	3	303	1.86335	1.18641	0.467243	1	1	1	RAB11FIP2; CLIP1; SYT3;
Cell surface	3	205	1.86335	1.75355	0.246355	1	1	1	SEMA7A; CSPG4; HSPD1;
Extracellular	18	1825	11.1801	1.17862	0.266792	1	1	1	SEMA7A; CHRNB4; PKM; SLIT1; PRKG1; RCN2; PRDX3; DKK1; CHRNA5; LOXL1; ZPBP; RAB35; NTN1; SPOCK1; MGAT5; HSPD1; ST3GAL4; KIRREL3;
Kinetochore	3	90	1.86335	3.99395	0.0398824	1	1	1	ZWINT; CLIP1; CENPH;
Extracellular region	1	442	0.621118	0.272908	0.976707	1	1	1	LOXL1;
Nuclear pore	1	42	0.621118	2.87141	0.297772	1	1	1	SNUPN;
Membrane	7	350	4.34783	2.39202	0.0282138	1	1	1	SEMA7A; CSPG4; TSPAN3; SCAMP2; GOLT1B; PTGES; B3GNT6;
PML body	1	37	0.621118	3.25933	0.26756	1	1	1	PML;
Extracellular space	2	404	1.24224	0.594197	0.855179	1	1	1	SLIT1; HSPD1;
Extracellular matrix	1	120	0.621118	1.00515	0.63653	1	1	1	LOXL1;
Endoplasmic reticulum membrane	2	150	1.24224	1.6003	0.358189	1	1	1	CYP1A2; ACER3;
Ubiquitin ligase complex	1	43	0.621118	2.80465	0.303664	1	1	1	ARIH1;
Nucleoplasm	3	449	1.86335	0.80064	0.729074	1	1	1	PML; CCNB1; POLR2E;
Centrosome	7	656	4.34783	1.27625	0.31097	1	1	1	BBS4; PML; WDR61; HSPD1; CENPH; CCNB1; RPS28;
Soluble fraction	1	180	0.621118	0.670118	0.781394	1	1	1	GRK5;
Integral to Golgi membrane	2	19	1.24224	12.6282	0.0108495	1	0.945108	1	SGMS1; ACER3;
Cytoskeleton	2	427	1.24224	0.562192	0.875775	1	1	1	PCLO; CASP8;
Intracellular	2	151	1.24224	1.58971	0.361207	1	1	1	CSTF2T; PAPSS2;
Cell-cell junction	1	38	0.621118	3.17359	0.273704	1	1	1	PKP4;
Mitochondrial small ribosomal subunit	1	17	0.621118	7.09159	0.133236	1	1	1	MRPS36;
Microtubule	1	129	0.621118	0.935028	0.663184	1	1	1	CLIP1;
Insoluble fraction	1	13	0.621118	9.27194	0.103568	1	1	1	PML;
Nuclear matrix	1	37	0.621118	3.25933	0.26756	1	1	1	PML;
Centriolar satellite	1	8	0.621118	15.0597	0.06506	1	1	1	BBS4;
Protein complex	1	65	0.621118	1.85553	0.421553	1	1	1	STRA6;
Eukaryotic translation initiation factor 3 complex	1	15	0.621118	8.03651	0.118526	1	1	1	EIF3A;
Nuclear membrane	1	78	0.621118	1.54631	0.481654	1	1	1	PML;
Late endosome	1	40	0.621118	3.01495	0.285838	1	1	1	CSK;
Proteasome complex	1	34	0.621118	3.54684	0.248816	1	1	1	PSMA4;
Spindle pole	1	24	0.621118	5.02407	0.182826	1	1	1	CCNB1;
Nicotinic acetylcholine-gated receptor-channel complex	2	11	1.24224	21.804	0.00364605	1	0.714625	1	CHRNB4; CHRNA3;
Mitochondrial outer membrane	1	29	0.621118	4.15815	0.216511	1	1	1	CASP8;
Microsome	4	156	2.48447	3.06986	0.0422985	1	1	1	CYP1A2; CYP1A1; ABCC9; PTGES;
Microtubule cytoskeleton	1	47	0.621118	2.56601	0.326745	1	1	1	CLIP1;
Intracellular membrane-bounded organelle	2	127	1.24224	1.8901	0.28767	1	1	1	SLIT1; SCAMP2;
Mitochondrial matrix	2	79	1.24224	3.03837	0.141774	1	1	1	ETFA; HSPD1;
Centriole	1	22	0.621118	5.4806	0.168952	1	1	1	BBS4;
Peroxisome	1	111	0.621118	1.08664	0.60778	1	1	1	HSPD1;
Golgi membrane	2	55	1.24224	4.36396	0.0775734	1	1	1	SCAMP5; MGAT5;
Coated pit	2	13	1.24224	18.4521	0.00511426	1	0.801916	1	RAB35; HSPD1;
Integral to endoplasmic reticulum membrane	1	31	0.621118	3.88997	0.229595	1	1	1	ACER3;
Early endosome	4	69	2.48447	6.93999	0.00268157	1	0.700784	1	CSK; PRDX3; HSPD1; CASP8;
SNARE complex	1	9	0.621118	13.3882	0.0728909	1	1	1	SCAMP5;
Unconventional myosin complex	1	7	0.621118	17.208	0.0571634	1	1	1	MYO9A;
Cytoplasmic vesicle	1	160	0.621118	0.753878	0.740974	1	1	1	SCAMP5;
Sin3 complex	1	7	0.621118	17.208	0.0571634	1	1	1	SIN3A;
Intermediate filament	1	36	0.621118	3.34985	0.261364	1	1	1	CLIP1;
Apolipoprotein B mRNA editing enzyme complex	1	4	0.621118	30.0818	0.0330737	1	1	1	A1CF;
IkappaB kinase complex	1	8	0.621118	15.0597	0.06506	1	1	1	PRDX3;
BBSome	1	7	0.621118	17.208	0.0571634	1	1	1	BBS4;
Others	1	51	0.621118	2.36479	0.349066	1	1	1	HSPD1;
Synapse	1	33	0.621118	3.65429	0.242462	1	1	1	PRKCA;
Lipopolysaccharide receptor complex	1	5	0.621118	24.0774	0.0411708	1	1	1	HSPD1;
Apical membrane	1	16	0.621118	7.53454	0.125912	1	1	1	PTEN;
Nonmotile primary cilium	1	3	0.621118	40.0757	0.0249086	1	1	1	BBS4;
Small ribosomal subunit	1	13	0.621118	9.27194	0.103568	1	1	1	RPS28;
Peroxisomal matrix	1	11	0.621118	10.9562	0.0883577	1	1	1	HSPD1;
DNA-directed RNA polymerase II, core complex	1	13	0.621118	9.27194	0.103568	1	1	1	POLR2E;
Motile secondary cilium	1	4	0.621118	30.0818	0.0330737	1	1	1	BBS4;
Microtubule basal body	1	8	0.621118	15.0597	0.06506	1	1	1	BBS4;
Golgi trans cisterna	1	3	0.621118	40.0757	0.0249086	1	1	1	SGMS1;
Recycling endosome membrane	2	7	1.24224	34.2456	0.00142312	1	0.557862	1	SCAMP2; SCAMP5;
Pericentriolar material	1	5	0.621118	24.0774	0.0411708	1	1	1	BBS4;
Intracellular vesicle (None)	1	8	0.621118	15.0597	0.06506	1	1	1	PSTPIP1;
CUL4 RING ubiquitin ligase complex	1	11	0.621118	10.9562	0.0883577	1	1	1	DCAF11;
Desmosome	1	11	0.621118	10.9562	0.0883577	1	1	1	PKP4;
Cilium membrane	1	2	0.621118	60.0139	0.016675	1	1	1	BBS4;
Outer kinetochore of condensed nuclear chromosome	1	3	0.621118	40.0757	0.0249086	1	1	1	CCNB1;
Trans-Golgi network membrane	2	3	1.24224	79.7547	0.000207841	0.162947	0.162947	1	SCAMP2; SCAMP5;
Death-inducing signaling complex	1	4	0.621118	30.0818	0.0330737	1	1	1	CASP8;
Coated vesicle	1	3	0.621118	40.0757	0.0249086	1	1	1	HSPD1;
Cell projection membrane	1	1	0.621118	119.434	0.00837233	1	0.829611	1	RAB35;
Cyclin-dependent protein kinase activating kinase holoenzyme complex	1	6	0.621118	20.0712	0.0492005	1	1	1	HSPD1;
Clathrin-coated endocytic vesicle	1	3	0.621118	40.0757	0.0249086	1	1	1	RAB35;
Intercellular bridge	1	1	0.621118	119.434	0.00837233	1	0.829611	1	RAB35;

## Sheet: Molecular function
Analysis: Molecular function
Dataset name: Racing
Number of genes in the dataset: 161
Number of genes in the dataset (which are available in Molecular function database) :158
Number of genes in background: 19230
Is analysis quantitative: No
						Corrected p-values
Molecular function	No. of genes in the dataset	No.of genes in the background dataset	Percentage of genes	Fold enrichment	P-value (Hypergeometric test)	Bonferroni method	BH method	Q-value (Storey-Tibshirani method)
Molecular function unknown	44	5685	27.3292	0.924585	0.759459	1	1	1	DCAF11; SEMA7A; ZWINT; C15orf59; BBS4; WDR61; LINGO1; CPLX3; HYKK; ODF3L1; LMAN1L; FAM219B; TMEM202; CCDC33; CACUL1; FAM45A; COMMD4; MCMBP; SNX33; STRA6; C15orf39; FAM204A; PEAK1; DNAJA4; LRRC49; COA1; VWC2; ZPBP; ST7L; GOLT1B; LRRC43; TMEM71; ANKRD6; TANC2; TMEM98; YTHDC2; KLHL29; ALS2CR12; PTGES; LCN15; ZC3H12C; TSKU; C11orf53; LRRC32;
Cell adhesion molecule activity	6	356	3.72671	2.01622	0.0792443	1	1	1	ISLR; TSPAN3; TSPAN9; CNTN1; PKP4; INVS;
Ligase activity	1	112	0.621118	1.07694	0.611083	1	1	1	PAPSS2;
Transporter activity	4	576	2.48447	0.831459	0.714475	1	1	1	SEC23IP; PML; CRABP1; SCAMP5;
Translation regulator activity	1	101	0.621118	1.19422	0.573179	1	1	1	EIF3A;
ATPase activity	1	111	0.621118	1.08664	0.60778	1	1	1	ATAD1;
Protein-tyrosine kinase activity	1	38	0.621118	3.17359	0.273704	1	1	1	CSK;
Catalytic activity	7	532	4.34783	1.57371	0.159517	1	1	1	PCK2; PKM; CYP1A2; CYP1A1; PPCDC; LOXL1; PDHX;
GTPase activator activity	3	144	1.86335	2.49632	0.120344	1	1	1	RGS10; TBC1D21; ARHGAP20;
Oxidoreductase activity	3	161	1.86335	2.23275	0.152759	1	1	1	COX5A; CYP11A1; FDX1;
Ion channel activity	1	66	0.621118	1.82742	0.426412	1	1	1	ABCC9;
Hydrolase activity	2	203	1.24224	1.18251	0.508683	1	1	1	MAN2C1; ACER3;
Isomerase activity	1	45	0.621118	2.68003	0.315301	1	1	1	MPI;
Receptor binding	2	129	1.24224	1.8608	0.293862	1	1	1	SLIT1; DKK1;
Structural molecule activity	1	269	0.621118	0.448414	0.897472	1	1	1	CLIP1;
Structural constituent of cytoskeleton	2	137	1.24224	1.75215	0.318546	1	1	1	PCLO; ABLIM3;
Cytoskeletal protein binding	2	218	1.24224	1.10115	0.547007	1	1	1	UBE2Q2; RDX;
G-protein coupled receptor activity	2	736	1.24224	0.326166	0.98643	1	1	1	PRLHR; GPR142;
Protein serine/threonine kinase activity	5	301	3.10559	1.98785	0.109086	1	1	1	PRKG1; ULK3; GRK5; STK17A; PRKCA;
Transcription regulator activity	4	832	2.48447	0.575629	0.921877	1	1	1	PML; ARID3B; SIN3A; POU2AF1;
Extracellular matrix structural constituent	1	166	0.621118	0.726631	0.753823	1	1	1	SPOCK1;
Receptor activity	1	361	0.621118	0.33414	0.953301	1	1	1	NEO1;
Ligand-dependent nuclear receptor activity	1	35	0.621118	3.44553	0.255116	1	1	1	NR2E3;
Transcription factor activity	3	842	1.86335	0.426949	0.974242	1	1	1	NRL; ISL2; MLXIP;
Receptor signaling complex scaffold activity	5	322	3.10559	1.85821	0.134011	1	1	1	PSTPIP1; BAG3; SNUPN; RAB11FIP2; PACSIN2;
Calcium ion binding	3	185	1.86335	1.94311	0.202462	1	1	1	RCN2; SYT3; CIB4;
Ubiquitin-specific protease activity	3	377	1.86335	0.953543	0.614369	1	1	1	PSMA4; ARIH1; HECW1;
Ribonuclease activity	1	48	0.621118	2.51256	0.332396	1	1	1	RPP25;
Growth factor activity	1	110	0.621118	1.09652	0.604449	1	1	1	NRG4;
DNA repair protein	2	57	1.24224	4.21087	0.0824882	1	1	1	NEIL1; PARP6;
Protein binding	2	182	1.24224	1.31895	0.451645	1	1	1	CSPG4; RILPL2;
RNA binding	6	366	3.72671	1.96114	0.087719	1	1	1	CSTF2T; TIAL1; A1CF; IREB2; EDC3; DDX11;
GTPase activity	3	222	1.86335	1.61928	0.284732	1	1	1	RAB35; RRAGD; RABL6;
DNA binding	3	654	1.86335	0.549679	0.91472	1	1	1	SCAPER; SIN3A; CENPH;
Auxiliary transport protein activity	3	333	1.86335	1.07953	0.530107	1	1	1	ETFA; SCAMP2; STOML1;
Motor activity	1	79	0.621118	1.52674	0.486012	1	1	1	MYO9A;
Kinase binding	1	16	0.621118	7.53454	0.125912	1	1	1	CCNB1;
Voltage-gated ion channel activity	2	130	1.24224	1.84649	0.296956	1	1	1	CHRNB4; CHRNA5;
DNA-directed RNA polymerase activity	1	29	0.621118	4.15815	0.216511	1	1	1	POLR2E;
Antigen binding	2	42	1.24224	5.71439	0.0482203	1	1	1	NPTN; KIRREL3;
Cysteine-type peptidase activity	2	46	1.24224	5.2176	0.0567326	1	1	1	SENP8; CASP8;
Structural constituent of ribosome	2	152	1.24224	1.57925	0.36422	1	1	1	MRPS36; RPS28;
Heat shock protein activity	2	27	1.24224	8.88788	0.0213194	1	0.955107	1	HSPD1; HSPE1;
Kinase activity	2	14	1.24224	17.135	0.00593398	1	0.44307	1	SGMS1; PKM;
Extracellular ligand-gated ion channel activity	1	41	0.621118	2.94143	0.29183	1	1	1	CHRNA3;
Protein threonine/tyrosine kinase activity	1	28	0.621118	4.3066	0.209886	1	1	1	CLK3;
Cytokine activity	1	107	0.621118	1.12726	0.594287	1	1	1	IL31;
Enzyme regulator activity	1	13	0.621118	9.27194	0.103568	1	1	1	PRPSAP1;
Protein tyrosine phosphatase activity	1	25	0.621118	4.82319	0.189676	1	1	1	PTPN9;
Phosphorylase activity	1	20	0.621118	6.02838	0.154845	1	1	1	ADPGK;
Peroxidase activity	1	20	0.621118	6.02838	0.154845	1	1	1	PRDX3;
Chemokine activity	1	53	0.621118	2.27557	0.359949	1	1	1	NTN1;
Lipid phosphatase activity	3	28	1.86335	12.8345	0.00161807	0.362448	0.181224	0.967789	MINPP1; INPP5F; PTEN;
Glucosyltransferase activity	2	2	1.24224	119.434	6.96642e-05	0.0156048	0.0156048	0.0833341	MGAT5; B3GNT6;
Sialyltransferase activity	1	19	0.621118	6.3455	0.147702	1	1	1	ST3GAL4;
Ubiquitin-like-protein-specific protease activity	1	2	0.621118	60.0139	0.016675	1	0.9338	1	UBL7;

## Sheet: Biological process
Analysis: Biological process
Dataset name: Racing
Number of genes in the dataset: 161
Number of genes in the dataset (which are available in Biological process database) :158
Number of genes in background: 19230
Is analysis quantitative: No
						Corrected p-values
Biological process	No. of genes in the dataset	No.of genes in the background dataset	Percentage of genes	Fold enrichment	P-value (Hypergeometric test)	Bonferroni method	BH method	Q-value (Storey-Tibshirani method)
Biological_process unknown	37	4731	22.9814	0.934312	0.712534	1	1	1	DCAF11; C15orf59; BBS4; WDR61; LINGO1; CPLX3; HYKK; ODF3L1; LMAN1L; FAM219B; TMEM202; CCDC33; CACUL1; FAM45A; COMMD4; MCMBP; STRA6; C15orf39; FAM204A; PEAK1; LRRC49; COA1; VWC2; ZPBP; ST7L; LRRC43; RILPL2; TMEM71; TANC2; TMEM98; YTHDC2; KLHL29; ALS2CR12; LCN15; ZC3H12C; TSKU; C11orf53;
Protein metabolism	12	1323	7.45342	1.08419	0.430162	1	1	1	SENP8; PSMA4; UBL7; ARIH1; EIF3A; DNAJA4; HECW1; MGAT5; HSPD1; HSPE1; MRPS36; RPS28;
Metabolism	19	1683	11.8012	1.34903	0.111286	1	1	1	PCK2; SGMS1; COX5A; ATAD1; ETFA; PKM; CYP1A2; PAPSS2; MPI; CYP1A1; PRDX3; CYP11A1; ADPGK; MAN2C1; PRPSAP1; PDHX; ACER3; FDX1; B3GNT6;
Energy pathways	18	1633	11.1801	1.3172	0.139441	1	1	1	PCK2; SGMS1; COX5A; ATAD1; ETFA; PKM; CYP1A2; MPI; CYP1A1; PRDX3; CYP11A1; ADPGK; MAN2C1; PRPSAP1; PDHX; ACER3; FDX1; B3GNT6;
Cell growth and/or maintenance	9	1125	5.59006	0.956522	0.604217	1	1	1	MYO9A; RAB11FIP2; LOXL1; CNTN1; CLIP1; ABLIM3; PKP4; INVS; RDX;
Transport	6	1215	3.72671	0.590774	0.945552	1	1	1	SEC23IP; SCAMP2; CRABP1; SNUPN; STOML1; SCAMP5;
Cell communication	43	3713	26.7081	1.38347	0.0133243	1	0.886746	1	CHRNB4; PSTPIP1; ISLR; PRLHR; CHRNA3; CSPG4; SLIT1; MINPP1; CSK; PRKG1; INPP5F; SNX33; RCN2; PTEN; DKK1; NRG4; ULK3; CHRNA5; PTPN9; CLK3; RGS10; GRK5; NEO1; TBC1D21; STK17A; TSPAN9; GOLT1B; RAB35; SYT3; RRAGD; ANKRD6; GPR142; PRKCA; NTN1; SPOCK1; CIB4; CCNB1; RABL6; PACSIN2; ST3GAL4; LRRC32; ARHGAP20; KIRREL3;
Signal transduction	44	3934	27.3292	1.33611	0.0217389	1	0.886746	1	CHRNB4; PSTPIP1; ISLR; PRLHR; CHRNA3; CSPG4; SLIT1; MINPP1; CSK; PRKG1; INPP5F; SNX33; RCN2; PTEN; DKK1; NRG4; ULK3; CHRNA5; PTPN9; CLK3; RGS10; GRK5; NEO1; TBC1D21; STK17A; TSPAN9; GOLT1B; RAB35; SYT3; RRAGD; ANKRD6; GPR142; PRKCA; NTN1; SPOCK1; CIB4; HSPD1; CCNB1; RABL6; PACSIN2; ST3GAL4; LRRC32; ARHGAP20; KIRREL3;
Regulation of nucleobase, nucleoside, nucleotide and nucleic acid metabolism	16	2828	9.93789	0.676141	0.971386	1	1	1	NRL; NEIL1; RPP25; CSTF2T; ISL2; TIAL1; A1CF; ARID3B; IREB2; SCAPER; SIN3A; DDX11; MLXIP; CENPH; POLR2E; POU2AF1;
Immune response	3	576	1.86335	0.624113	0.864658	1	1	1	SEMA7A; NPTN; IL31;
Ion transport	1	48	0.621118	2.51256	0.332396	1	1	1	ABCC9;
Cell cycle	1	22	0.621118	5.4806	0.168952	1	1	1	ZWINT;
Apoptosis	3	220	1.86335	1.634	0.280184	1	1	1	BAG3; HSPD1; CASP8;
Regulation of gene expression, epigenetic	2	66	1.24224	3.63675	0.105693	1	1	1	PML; NR2E3;
Regulation of immune response	1	8	0.621118	15.0597	0.06506	1	1	1	HSPD1;
Protein folding	1	16	0.621118	7.53454	0.125912	1	1	1	HSPD1;
Cell motility	1	20	0.621118	6.02838	0.154845	1	1	1	TSPAN3;
Cytoskeleton organization and biogenesis	1	21	0.621118	5.74146	0.161928	1	1	1	UBE2Q2;
DNA repair	1	58	0.621118	2.07943	0.386372	1	1	1	PARP6;
Lipid metabolism	1	33	0.621118	3.65429	0.242462	1	1	1	PTGES;
Nucleobase, nucleoside, nucleotide and nucleic acid transport	1	7	0.621118	17.208	0.0571634	1	1	1	EDC3;
Mitosis	1	5	0.621118	24.0774	0.0411708	1	1	1	CLIP1;
Synaptic vesicle transport	1	3	0.621118	40.0757	0.0249086	1	0.886746	1	PCLO;
Reproductive physiological process	1	2	0.621118	60.0139	0.016675	1	0.886746	1	ZPBP;
Coenzyme and prosthetic group metabolism	1	1	0.621118	119.434	0.00837233	1	0.886746	1	PPCDC;

## Sheet: Biological pathway
Analysis: Biological pathway
Dataset name: Racing
Number of genes in the dataset: 161
Number of genes in the dataset (which are available in Biological pathway database) :61
Number of genes in background: 19230
Is analysis quantitative: No
						Corrected p-values
Biological pathway	No. of genes in the dataset	No.of genes in the background dataset	Percentage of genes	Fold enrichment	P-value (Hypergeometric test)	Bonferroni method	BH method	Q-value (Storey-Tibshirani method)
Vif-mediated degradation of APOBEC3G	1	69	0.621118	1.74798	0.440748	1	1	1	PSMA4;
Developmental Biology	7	432	4.34783	1.93799	0.0715775	1	1	1	SEMA7A; SLIT1; NEO1; CNTN1; NTN1; ABLIM3; RPS28;
Vpu mediated degradation of CD4	1	67	0.621118	1.80015	0.431231	1	1	1	PSMA4;
MicroRNA (miRNA) Biogenesis	1	22	0.621118	5.4806	0.168952	1	1	1	POLR2E;
Regulatory RNA pathways	1	22	0.621118	5.4806	0.168952	1	1	1	POLR2E;
Axon guidance	6	219	3.72671	3.27746	0.0104285	1	0.690641	1	SEMA7A; SLIT1; NEO1; CNTN1; NTN1; ABLIM3;
Semaphorin interactions	1	64	0.621118	1.88452	0.416652	1	1	1	SEMA7A;
Other semaphorin interactions	1	16	0.621118	7.53454	0.125912	1	1	1	SEMA7A;
CDO in myogenesis	1	24	0.621118	5.02407	0.182826	1	1	1	NEO1;
Myogenesis	1	24	0.621118	5.02407	0.182826	1	1	1	NEO1;
Neurofascin interactions	1	9	0.621118	13.3882	0.0728909	1	1	1	CNTN1;
Regulation of beta-cell development	1	108	0.621118	1.11682	0.597703	1	1	1	RPS28;
Netrin mediated repulsion signals	1	15	0.621118	8.03651	0.118526	1	1	1	NTN1;
Role of second messengers in netrin-1 signaling	1	10	0.621118	12.0507	0.0806566	1	1	1	NTN1;
L1CAM interactions	1	79	0.621118	1.52674	0.486012	1	1	1	CNTN1;
Platelet activation, signaling and aggregation	2	138	1.24224	1.73945	0.321619	1	1	1	CSK; PRKCA;
Elongation arrest and recovery	1	31	0.621118	3.88997	0.229595	1	1	1	POLR2E;
Regulation of gene expression in beta cells	1	98	0.621118	1.23077	0.562219	1	1	1	RPS28;
Hemostasis	3	375	1.86335	0.958628	0.610764	1	1	1	CSK; SIN3A; PRKCA;
Response to elevated platelet cytosolic Ca2+	1	39	0.621118	3.09223	0.279796	1	1	1	PRKCA;
Platelet Aggregation (Plug Formation)	1	29	0.621118	4.15815	0.216511	1	1	1	CSK;
Integrin alphaIIb beta3 signaling	1	20	0.621118	6.02838	0.154845	1	1	1	CSK;
Mitotic Prometaphase	3	99	1.86335	3.6309	0.0504685	1	0.956608	1	ZWINT; CLIP1; CENPH;
Mitotic M-M/G1 phases	4	242	2.48447	1.97896	0.145724	1	1	1	ZWINT; PSMA4; CLIP1; CENPH;
M Phase	3	158	1.86335	2.27514	0.146847	1	1	1	ZWINT; CLIP1; CENPH;
DNA Replication	4	261	2.48447	1.83491	0.17596	1	1	1	ZWINT; PSMA4; CLIP1; CENPH;
Factors involved in megakaryocyte development and platelet production	1	119	0.621118	1.0136	0.633442	1	1	1	SIN3A;
Netrin-1 signaling	4	45	2.48447	10.6405	0.000539807	0.900398	0.493216	1	SLIT1; NEO1; NTN1; ABLIM3;
DCC mediated attractive signaling	2	10	1.24224	23.9822	0.00299958	1	0.690641	1	NTN1; ABLIM3;
Neuronal System	1	188	0.621118	0.641604	0.795747	1	1	1	ABCC9;
ATP sensitive Potassium channels	1	4	0.621118	30.0818	0.0330737	1	0.75571	1	ABCC9;
Inwardly rectifying K+ channels	1	23	0.621118	5.24242	0.175918	1	1	1	ABCC9;
Potassium Channels	1	76	0.621118	1.587	0.472829	1	1	1	ABCC9;
Host Interactions of HIV factors	1	141	0.621118	0.855457	0.695725	1	1	1	PSMA4;
Pausing and recovery of Tat-mediated HIV-1 elongation	1	30	0.621118	4.01959	0.223081	1	1	1	POLR2E;
Pausing and recovery of HIV-1 elongation	1	31	0.621118	3.88997	0.229595	1	1	1	POLR2E;
Tat-mediated HIV-1 elongation arrest and recovery	1	30	0.621118	4.01959	0.223081	1	1	1	POLR2E;
Abortive elongation of HIV-1 transcript in the absence of Tat	1	23	0.621118	5.24242	0.175918	1	1	1	POLR2E;
Formation of HIV-1 elongation complex in the absence of HIV-1 Tat	1	42	0.621118	2.87141	0.297772	1	1	1	POLR2E;
HIV-1 elongation arrest and recovery	1	31	0.621118	3.88997	0.229595	1	1	1	POLR2E;
HIV-1 Transcription Elongation	1	41	0.621118	2.94143	0.29183	1	1	1	POLR2E;
Formation of the HIV-1 Early Elongation Complex	1	32	0.621118	3.76845	0.236056	1	1	1	POLR2E;
Tat-mediated elongation of the HIV-1 transcript	1	41	0.621118	2.94143	0.29183	1	1	1	POLR2E;
Formation of HIV-1 elongation complex containing HIV-1 Tat	1	41	0.621118	2.94143	0.29183	1	1	1	POLR2E;
Transcription of the HIV genome	1	60	0.621118	2.01013	0.396635	1	1	1	POLR2E;
HIV-1 Transcription Initiation	1	39	0.621118	3.09223	0.279796	1	1	1	POLR2E;
RNA Polymerase II HIV-1 Promoter Escape	1	39	0.621118	3.09223	0.279796	1	1	1	POLR2E;
RNA Pol II CTD phosphorylation and interaction with CE	1	26	0.621118	4.63775	0.196469	1	1	1	POLR2E;
Late Phase of HIV Life Cycle	1	92	0.621118	1.31103	0.539453	1	1	1	POLR2E;
HIV Life Cycle	1	103	0.621118	1.17103	0.580334	1	1	1	POLR2E;
HIV Infection	2	203	1.24224	1.18251	0.508683	1	1	1	PSMA4; POLR2E;
PLC-gamma1 signalling	1	30	0.621118	4.01959	0.223081	1	1	1	PRKCA;
PI3K/AKT activation	1	30	0.621118	4.01959	0.223081	1	1	1	PTEN;
Signalling by NGF	2	143	1.24224	1.67864	0.33693	1	1	1	PTEN; PRKCA;
NGF signalling via TRKA from the plasma membrane	2	107	1.24224	2.24336	0.225716	1	1	1	PTEN; PRKCA;
Negative regulation of the PI3K/AKT network	1	5	0.621118	24.0774	0.0411708	1	0.880421	1	PTEN;
PIP3 activates AKT signaling	1	21	0.621118	5.74146	0.161928	1	1	1	PTEN;
Signaling by FGFR	2	95	1.24224	2.5267	0.189042	1	1	1	PTEN; PRKCA;
GAB1 signalosome	2	32	1.24224	7.49958	0.0293198	1	0.740991	1	CSK; PTEN;
PI-3K cascade	1	27	0.621118	4.46605	0.203206	1	1	1	PTEN;
Phospholipase C-mediated cascade	1	27	0.621118	4.46605	0.203206	1	1	1	PRKCA;
Downstream signaling of activated FGFR	2	66	1.24224	3.63675	0.105693	1	1	1	PTEN; PRKCA;
Signaling by EGFR	3	98	1.86335	3.66794	0.049231	1	0.954852	1	CSK; PTEN; PRKCA;
Signal Transduction	7	1208	4.34783	0.693065	0.885802	1	1	1	PRLHR; PSMA4; CSK; PTEN; RGS10; GRK5; PRKCA;
DAG and IP3 signaling	1	27	0.621118	4.46605	0.203206	1	1	1	PRKCA;
EGFR interacts with phospholipase C-gamma	1	29	0.621118	4.15815	0.216511	1	1	1	PRKCA;
Calmodulin induced events	1	25	0.621118	4.82319	0.189676	1	1	1	PRKCA;
CaM pathway	1	25	0.621118	4.82319	0.189676	1	1	1	PRKCA;
Assembly of the pre-replicative complex	1	83	0.621118	1.45317	0.503081	1	1	1	PSMA4;
DNA Replication Pre-Initiation	1	98	0.621118	1.23077	0.562219	1	1	1	PSMA4;
M/G1 Transition	1	98	0.621118	1.23077	0.562219	1	1	1	PSMA4;
Autodegradation of Cdh1 by Cdh1:APC/C	1	60	0.621118	2.01013	0.396635	1	1	1	PSMA4;
APC/C:Cdc20 mediated degradation of Cyclin B	1	22	0.621118	5.4806	0.168952	1	1	1	CCNB1;
APC/C:Cdc20 mediated degradation of Securin	1	66	0.621118	1.82742	0.426412	1	1	1	PSMA4;
APC/C:Cdh1 mediated degradation of Cdc20 and other APC/C:Cdh1 targeted proteins in late mitosis/early G1	1	69	0.621118	1.74798	0.440748	1	1	1	PSMA4;
Regulation of mitotic cell cycle	2	81	1.24224	2.96336	0.147539	1	1	1	PSMA4; CCNB1;
Recruitment of NuMA to mitotic centrosomes	1	12	0.621118	10.044	0.0959946	1	1	1	CCNB1;
Phosphorylation of Emi1	1	20	0.621118	6.02838	0.154845	1	1	1	CCNB1;
APC/C-mediated degradation of cell cycle proteins	2	81	1.24224	2.96336	0.147539	1	1	1	PSMA4; CCNB1;
Regulation of APC/C activators between G1/S and early anaphase	2	78	1.24224	3.07732	0.138911	1	1	1	PSMA4; CCNB1;
APC/C:Cdc20 mediated degradation of mitotic proteins	2	71	1.24224	3.38067	0.119257	1	1	1	PSMA4; CCNB1;
Phosphorylation of the APC/C	1	18	0.621118	6.69783	0.140499	1	1	1	CCNB1;
Activation of APC/C and APC/C:Cdc20 mediated degradation of mitotic proteins	2	72	1.24224	3.33373	0.12202	1	1	1	PSMA4; CCNB1;
SCF-beta-TrCP mediated degradation of Emi1	1	70	0.621118	1.72301	0.445447	1	1	1	PSMA4;
Ubiquitin-dependent degradation of Cyclin D	1	66	0.621118	1.82742	0.426412	1	1	1	PSMA4;
Ubiquitin-dependent degradation of Cyclin D1	1	66	0.621118	1.82742	0.426412	1	1	1	PSMA4;
Mitotic G2-G2/M phases	1	99	0.621118	1.21834	0.565903	1	1	1	CCNB1;
G2/M Transition	1	96	0.621118	1.25641	0.554758	1	1	1	CCNB1;
Cyclin A/B1 associated events during G2/M transition	1	14	0.621118	8.61013	0.111078	1	1	1	CCNB1;
Cyclin B2 mediated events	1	6	0.621118	20.0712	0.0492005	1	0.954852	1	CCNB1;
Recruitment of mitotic centrosome proteins and complexes	1	70	0.621118	1.72301	0.445447	1	1	1	CCNB1;
Centrosome maturation	1	70	0.621118	1.72301	0.445447	1	1	1	CCNB1;
E2F-enabled inhibition of pre-replication complex formation	1	10	0.621118	12.0507	0.0806566	1	1	1	CCNB1;
E2F mediated regulation of DNA replication	1	28	0.621118	4.3066	0.209886	1	1	1	CCNB1;
SCF(Skp2)-mediated degradation of p27/p21	1	67	0.621118	1.80015	0.431231	1	1	1	PSMA4;
Cyclin E associated events during G1/S transition	1	78	0.621118	1.54631	0.481654	1	1	1	PSMA4;
G1/S Transition	2	117	1.24224	2.05163	0.256656	1	1	1	PSMA4; CCNB1;
S Phase	1	121	0.621118	0.996843	0.639592	1	1	1	PSMA4;
Cyclin A:Cdk2-associated events at S phase entry	1	90	0.621118	1.34016	0.531606	1	1	1	PSMA4;
Mitotic G1-G1/S phases	2	140	1.24224	1.7146	0.327755	1	1	1	PSMA4; CCNB1;
Cell Cycle, Mitotic	5	317	3.10559	1.88752	0.127858	1	1	1	ZWINT; PSMA4; CLIP1; CENPH; CCNB1;
mRNA Splicing - Minor Pathway	1	42	0.621118	2.87141	0.297772	1	1	1	POLR2E;
mRNA Splicing - Major Pathway	1	107	0.621118	1.12726	0.594287	1	1	1	POLR2E;
mRNA Splicing	1	107	0.621118	1.12726	0.594287	1	1	1	POLR2E;
Formation of the Editosome	1	2	0.621118	60.0139	0.016675	1	0.690641	1	A1CF;
mRNA Editing: C to U Conversion	1	2	0.621118	60.0139	0.016675	1	0.690641	1	A1CF;
mRNA Editing	1	4	0.621118	30.0818	0.0330737	1	0.75571	1	A1CF;
Processing of Capped Intron-Containing Pre-mRNA	1	138	0.621118	0.874052	0.687895	1	1	1	POLR2E;
mRNA Capping	1	28	0.621118	4.3066	0.209886	1	1	1	POLR2E;
mRNA Processing	2	157	1.24224	1.52896	0.379201	1	1	1	A1CF; POLR2E;
Unfolded Protein Response	1	63	0.621118	1.91443	0.411711	1	1	1	DDX11;
Insulin Synthesis and Processing	1	132	0.621118	0.913779	0.67163	1	1	1	RPS28;
Activation of Chaperones by IRE1alpha	1	45	0.621118	2.68003	0.315301	1	1	1	DDX11;
Diabetes pathways	2	216	1.24224	1.11134	0.542018	1	1	1	DDX11; RPS28;
Nucleosome assembly	1	35	0.621118	3.44553	0.255116	1	1	1	CENPH;
Deposition of New CENPA-containing Nucleosomes at the Centromere	1	35	0.621118	3.44553	0.255116	1	1	1	CENPH;
Removal of licensing factors from origins	1	85	0.621118	1.41899	0.511403	1	1	1	PSMA4;
Chromosome Maintenance	1	69	0.621118	1.74798	0.440748	1	1	1	CENPH;
Regulation of DNA replication	1	88	0.621118	1.37062	0.523626	1	1	1	PSMA4;
CDT1 association with the CDC6:ORC:origin complex	1	74	0.621118	1.62989	0.463855	1	1	1	PSMA4;
Synthesis of DNA	1	109	0.621118	1.10658	0.60109	1	1	1	PSMA4;
Switching of origins to a post-replicative state	1	83	0.621118	1.45317	0.503081	1	1	1	PSMA4;
Orc1 removal from chromatin	1	83	0.621118	1.45317	0.503081	1	1	1	PSMA4;
CDK-mediated phosphorylation and removal of Cdc6	1	66	0.621118	1.82742	0.426412	1	1	1	PSMA4;
Signaling by GPCR	4	800	2.48447	0.598654	0.906783	1	1	1	PRLHR; RGS10; GRK5; PRKCA;
GPCR ligand binding	1	336	0.621118	0.359001	0.942153	1	1	1	PRLHR;
Class A/1 (Rhodopsin-like receptors)	1	274	0.621118	0.440232	0.901752	1	1	1	PRLHR;
Peptide ligand-binding receptors	1	167	0.621118	0.72228	0.755902	1	1	1	PRLHR;
Signaling by PDGF	2	78	1.24224	3.07732	0.138911	1	1	1	PTEN; PRKCA;
Downstream signal transduction	2	75	1.24224	3.20039	0.130401	1	1	1	PTEN; PRKCA;
Signaling by SCF-KIT	2	66	1.24224	3.63675	0.105693	1	1	1	PTEN; PRKCA;
Regulation of KIT signaling	1	9	0.621118	13.3882	0.0728909	1	1	1	PRKCA;
G alpha (i) signalling events	1	31	0.621118	3.88997	0.229595	1	1	1	RGS10;
GPCR downstream signaling	2	530	1.24224	0.452938	0.938917	1	1	1	RGS10; GRK5;
G alpha (q) signalling events	1	120	0.621118	1.00515	0.63653	1	1	1	GRK5;
Opioid Signalling	1	53	0.621118	2.27557	0.359949	1	1	1	PRKCA;
PLC beta mediated events	1	39	0.621118	3.09223	0.279796	1	1	1	PRKCA;
G-protein mediated events	1	40	0.621118	3.01495	0.285838	1	1	1	PRKCA;
Ca-dependent events	1	27	0.621118	4.46605	0.203206	1	1	1	PRKCA;
Adaptive Immune System	3	237	1.86335	1.51679	0.318995	1	1	1	PSMA4; CSK; PTEN;
TCR signaling	2	47	1.24224	5.10661	0.058937	1	1	1	CSK; PTEN;
Phosphorylation of CD3 and TCR zeta chains	1	9	0.621118	13.3882	0.0728909	1	1	1	CSK;
Immune System	6	522	3.72671	1.37506	0.273149	1	1	1	PSTPIP1; PML; PSMA4; CSK; PTEN; CASP8;
RNA Polymerase II Transcription	1	101	0.621118	1.19422	0.573179	1	1	1	POLR2E;
Formation and Maturation of mRNA Transcript	1	185	0.621118	0.652008	0.790477	1	1	1	POLR2E;
Signaling by Wnt	1	75	0.621118	1.60816	0.468361	1	1	1	PSMA4;
Degradation of beta-catenin by the destruction complex	1	75	0.621118	1.60816	0.468361	1	1	1	PSMA4;
Integrin cell surface interactions	1	72	0.621118	1.67516	0.454728	1	1	1	CSK;
Gene Expression	3	378	1.86335	0.95102	0.616163	1	1	1	EIF3A; POLR2E; RPS28;
Formation of RNA Pol II elongation complex	1	42	0.621118	2.87141	0.297772	1	1	1	POLR2E;
RNA Polymerase II Transcription Initiation And Promoter Clearance	1	39	0.621118	3.09223	0.279796	1	1	1	POLR2E;
RNA Polymerase II Transcription Initiation	1	39	0.621118	3.09223	0.279796	1	1	1	POLR2E;
RNA Polymerase II Pre-transcription Events	1	58	0.621118	2.07943	0.386372	1	1	1	POLR2E;
RNA Polymerase II Transcription Pre-Initiation And Promoter Opening	1	39	0.621118	3.09223	0.279796	1	1	1	POLR2E;
RNA Polymerase II Transcription Elongation	1	42	0.621118	2.87141	0.297772	1	1	1	POLR2E;
Formation of the Early Elongation Complex	1	32	0.621118	3.76845	0.236056	1	1	1	POLR2E;
RNA Polymerase II Promoter Escape	1	39	0.621118	3.09223	0.279796	1	1	1	POLR2E;
RNA Pol II CTD phosphorylation and interaction with CE - 11	1	26	0.621118	4.63775	0.196469	1	1	1	POLR2E;
Pyruvate metabolism	1	10	0.621118	12.0507	0.0806566	1	1	1	PDHX;
Pyruvate metabolism and Citric Acid (TCA) cycle	1	31	0.621118	3.88997	0.229595	1	1	1	PDHX;
The citric acid (TCA) cycle and respiratory electron transport	3	118	1.86335	3.04631	0.0767505	1	1	1	COX5A; ETFA; PDHX;
Pregnenolone biosynthesis	1	4	0.621118	30.0818	0.0330737	1	0.75571	1	CYP11A1;
DNA Repair	1	106	0.621118	1.13789	0.590843	1	1	1	POLR2E;
Sphingolipid metabolism	2	29	1.24224	8.27513	0.0243934	1	0.690641	1	SGMS1; ACER3;
Metabolism of steroid hormones and vitamins A and D	1	32	0.621118	3.76845	0.236056	1	1	1	CYP11A1;
Regulation of Lipid Metabolism by Peroxisome proliferator-activated receptor alpha (PPARalpha)	1	32	0.621118	3.76845	0.236056	1	1	1	CYP1A1;
Nucleotide Excision Repair	1	49	0.621118	2.46129	0.337999	1	1	1	POLR2E;
Metabolism	12	823	7.45342	1.74287	0.0440851	1	0.930809	1	COX5A; ETFA; CYP1A2; PSMA4; CYP1A1; CYP11A1; SNUPN; EDC3; PPCDC; PRKCA; PDHX; RPS28;
L13a-mediated translational silencing of Ceruloplasmin expression	2	102	1.24224	2.35331	0.210351	1	1	1	EIF3A; RPS28;
3' -UTR-mediated translational regulation	2	102	1.24224	2.35331	0.210351	1	1	1	EIF3A; RPS28;
Dual incision reaction in TC-NER	1	28	0.621118	4.3066	0.209886	1	1	1	POLR2E;
Formation of transcription-coupled NER (TC-NER) repair complex	1	28	0.621118	4.3066	0.209886	1	1	1	POLR2E;
Transcription-coupled NER (TC-NER)	1	44	0.621118	2.74092	0.309507	1	1	1	POLR2E;
Stabilization of p53	1	69	0.621118	1.74798	0.440748	1	1	1	PSMA4;
p53-Dependent G1 DNA Damage Response	1	72	0.621118	1.67516	0.454728	1	1	1	PSMA4;
p53-Dependent G1/S DNA damage checkpoint	1	72	0.621118	1.67516	0.454728	1	1	1	PSMA4;
G1/S DNA Damage Checkpoints	1	76	0.621118	1.587	0.472829	1	1	1	PSMA4;
Cell Cycle Checkpoints	2	118	1.24224	2.03425	0.259758	1	1	1	PSMA4; CCNB1;
Pausing and recovery of elongation	1	31	0.621118	3.88997	0.229595	1	1	1	POLR2E;
N-Glycan antennae elongation	2	9	1.24224	26.6439	0.0024129	1	0.690641	1	MGAT5; ST3GAL4;
Autodegradation of the E3 ubiquitin ligase COP1	1	68	0.621118	1.77368	0.43601	1	1	1	PSMA4;
G2/M DNA damage checkpoint	1	29	0.621118	4.15815	0.216511	1	1	1	CCNB1;
G2/M Checkpoints	1	43	0.621118	2.80465	0.303664	1	1	1	CCNB1;
G2/M DNA replication checkpoint	1	4	0.621118	30.0818	0.0330737	1	0.75571	1	CCNB1;
Chk1/Chk2(Cds1) mediated inactivation of Cyclin B:Cdk1 complex	1	5	0.621118	24.0774	0.0411708	1	0.880421	1	CCNB1;
p53-Independent G1/S DNA damage checkpoint	1	70	0.621118	1.72301	0.445447	1	1	1	PSMA4;
Ubiquitin Mediated Degradation of Phosphorylated Cdc25A	1	69	0.621118	1.74798	0.440748	1	1	1	PSMA4;
p53-Independent DNA Damage Response	1	70	0.621118	1.72301	0.445447	1	1	1	PSMA4;
Synthesis of substrates in N-glycan biosythesis	1	16	0.621118	7.53454	0.125912	1	1	1	MPI;
Biosynthesis of the N-glycan precursor (dolichol lipid-linked oligosaccharide, LLO) and transfer to a nascent protein	1	30	0.621118	4.01959	0.223081	1	1	1	MPI;
Asparagine N-linked glycosylation	3	77	1.86335	4.66816	0.0268424	1	0.710685	1	MPI; MGAT5; ST3GAL4;
N-glycan antennae elongation in the medial/trans-Golgi	2	12	1.24224	19.9885	0.00435128	1	0.690641	1	MGAT5; ST3GAL4;
Synthesis of GDP-mannose	1	5	0.621118	24.0774	0.0411708	1	0.880421	1	MPI;
Transport to the Golgi and subsequent modification	2	28	1.24224	8.57057	0.0228348	1	0.690641	1	MGAT5; ST3GAL4;
Post-translational protein modification	3	114	1.86335	3.15319	0.0707948	1	1	1	MPI; MGAT5; ST3GAL4;
Eukaryotic Translation Termination	1	82	0.621118	1.47089	0.498867	1	1	1	RPS28;
Eukaryotic Translation Elongation	1	85	0.621118	1.41899	0.511403	1	1	1	RPS28;
Peptide chain elongation	1	82	0.621118	1.47089	0.498867	1	1	1	RPS28;
Ribosomal scanning and start codon recognition	2	54	1.24224	4.44476	0.0751522	1	1	1	EIF3A; RPS28;
GTP hydrolysis and joining of the 60S ribosomal subunit	2	103	1.24224	2.33047	0.213416	1	1	1	EIF3A; RPS28;
Translation initiation complex formation	2	54	1.24224	4.44476	0.0751522	1	1	1	EIF3A; RPS28;
Activation of the mRNA upon binding of the cap-binding complex and eIFs, and subsequent binding to 43S	2	55	1.24224	4.36396	0.0775734	1	1	1	EIF3A; RPS28;
Formation of the ternary complex, and subsequently, the 43S complex	2	47	1.24224	5.10661	0.058937	1	1	1	EIF3A; RPS28;
Translation	2	117	1.24224	2.05163	0.256656	1	1	1	EIF3A; RPS28;
Eukaryotic Translation Initiation	2	110	1.24224	2.18218	0.234976	1	1	1	EIF3A; RPS28;
Cap-dependent Translation Initiation	2	110	1.24224	2.18218	0.234976	1	1	1	EIF3A; RPS28;
Formation of a pool of free 40S subunits	2	92	1.24224	2.60908	0.180005	1	1	1	EIF3A; RPS28;
Metabolism of proteins	5	259	3.10559	2.31019	0.0670068	1	1	1	MPI; EIF3A; MGAT5; ST3GAL4; RPS28;
Viral mRNA Translation	1	82	0.621118	1.47089	0.498867	1	1	1	RPS28;
Influenza Viral RNA Transcription and Replication	2	98	1.24224	2.44936	0.19814	1	1	1	POLR2E; RPS28;
Viral Messenger RNA Synthesis	1	14	0.621118	8.61013	0.111078	1	1	1	POLR2E;
Influenza Life Cycle	2	135	1.24224	1.7781	0.312391	1	1	1	POLR2E; RPS28;
Influenza Infection	2	140	1.24224	1.7146	0.327755	1	1	1	POLR2E; RPS28;
Aromatic amines can be N-hydroxylated or N-dealkylated by CYP1A2	1	1	0.621118	119.434	0.00837233	1	0.690641	1	CYP1A2;
Phase II conjugation	1	39	0.621118	3.09223	0.279796	1	1	1	CYP1A2;
Methylation	1	6	0.621118	20.0712	0.0492005	1	0.954852	1	CYP1A2;
Regulation of Insulin Secretion	1	48	0.621118	2.51256	0.332396	1	1	1	PRKCA;
Integration of energy metabolism	1	83	0.621118	1.45317	0.503081	1	1	1	PRKCA;
Regulation of ornithine decarboxylase (ODC)	1	70	0.621118	1.72301	0.445447	1	1	1	PSMA4;
Biological oxidations	3	98	1.86335	3.66794	0.049231	1	0.954852	1	CYP1A2; CYP1A1; CYP11A1;
Endogenous sterols	1	15	0.621118	8.03651	0.118526	1	1	1	CYP11A1;
Phase 1 - Functionalization of compounds	3	60	1.86335	5.99059	0.0139111	1	0.690641	1	CYP1A2; CYP1A1; CYP11A1;
Cytochrome P450 - arranged by substrate type	3	48	1.86335	7.48792	0.00756159	1	0.690641	1	CYP1A2; CYP1A1; CYP11A1;
Regulation of Insulin Secretion by Acetylcholine	1	3	0.621118	40.0757	0.0249086	1	0.690641	1	PRKCA;
Nonsense-Mediated Decay	1	104	0.621118	1.15977	0.583866	1	1	1	RPS28;
Stabilization of mRNA by HuR	1	8	0.621118	15.0597	0.06506	1	1	1	PRKCA;
Regulation of mRNA Stability by Proteins that Bind AU-rich Elements	2	104	1.24224	2.30806	0.216485	1	1	1	PSMA4; PRKCA;
Destabilization of mRNA by AUF1 (hnRNP D0)	1	71	0.621118	1.69875	0.450107	1	1	1	PSMA4;
mRNA Decay by 5' to 3' Exoribonuclease	1	13	0.621118	9.27194	0.103568	1	1	1	EDC3;
Deadenylation-dependent mRNA decay	1	46	0.621118	2.62178	0.321047	1	1	1	EDC3;
Metabolism of mRNA	4	234	2.48447	2.04662	0.133662	1	1	1	PSMA4; EDC3; PRKCA; RPS28;
Metabolism of RNA	5	281	3.10559	2.12933	0.0877016	1	1	1	PSMA4; SNUPN; EDC3; PRKCA; RPS28;
Respiratory electron transport	2	76	1.24224	3.15829	0.133224	1	1	1	COX5A; ETFA;
Regulation of pyruvate dehydrogenase (PDH) complex	1	9	0.621118	13.3882	0.0728909	1	1	1	PDHX;
Respiratory electron transport, ATP synthesis by chemiosmotic coupling, and heat production by uncoupling proteins.	2	91	1.24224	2.63775	0.177007	1	1	1	COX5A; ETFA;
Metabolism of amino acids and derivatives	1	188	0.621118	0.641604	0.795747	1	1	1	PSMA4;
Coenzyme A biosynthesis	1	6	0.621118	20.0712	0.0492005	1	0.954852	1	PPCDC;
Vitamin B5 (pantothenate) metabolism	1	9	0.621118	13.3882	0.0728909	1	1	1	PPCDC;
Nonsense Mediated Decay Enhanced by the Exon Junction Complex	1	104	0.621118	1.15977	0.583866	1	1	1	RPS28;
Nonsense Mediated Decay Independent of the Exon Junction Complex	1	87	0.621118	1.38637	0.519586	1	1	1	RPS28;
Metabolism of non-coding RNA	1	50	0.621118	2.41208	0.343556	1	1	1	SNUPN;
snRNP Assembly	1	50	0.621118	2.41208	0.343556	1	1	1	SNUPN;
Metabolism of vitamins and cofactors	1	47	0.621118	2.56601	0.326745	1	1	1	PPCDC;
Metabolism of water-soluble vitamins and cofactors	1	47	0.621118	2.56601	0.326745	1	1	1	PPCDC;
Xenobiotics	2	14	1.24224	17.135	0.00593398	1	0.690641	1	CYP1A2; CYP1A1;
Glucose metabolism	1	36	0.621118	3.34985	0.261364	1	1	1	PCK2;
Metabolism of carbohydrates	1	92	0.621118	1.31103	0.539453	1	1	1	PCK2;
Fatty acid, triacylglycerol, and ketone body metabolism	1	83	0.621118	1.45317	0.503081	1	1	1	CYP1A1;
Gluconeogenesis	1	20	0.621118	6.02838	0.154845	1	1	1	PCK2;
Cell-Cell communication	2	117	1.24224	2.05163	0.256656	1	1	1	NTN1; KIRREL3;
Transmembrane transport of small molecules	1	378	0.621118	0.319113	0.959634	1	1	1	ABCC9;
ABC-family proteins mediated transport	1	25	0.621118	4.82319	0.189676	1	1	1	ABCC9;
DSCAM interactions	1	9	0.621118	13.3882	0.0728909	1	1	1	NTN1;
Nephrin interactions	1	29	0.621118	4.15815	0.216511	1	1	1	KIRREL3;
Metabolism of lipids and lipoproteins	4	257	2.48447	1.86346	0.169421	1	1	1	SGMS1; CYP1A1; CYP11A1; ACER3;
PD-1 signaling	1	12	0.621118	10.044	0.0959946	1	1	1	CSK;
Class I MHC mediated antigen processing & presentation	1	101	0.621118	1.19422	0.573179	1	1	1	PSMA4;
Antigen processing: Ubiquitination & Proteasome degradation	1	69	0.621118	1.74798	0.440748	1	1	1	PSMA4;
Downstream TCR signaling	1	32	0.621118	3.76845	0.236056	1	1	1	PTEN;
Costimulation by the CD28 family	1	52	0.621118	2.31932	0.354531	1	1	1	CSK;
Transcription	1	178	0.621118	0.677647	0.777651	1	1	1	POLR2E;
RNA Polymerase I, RNA Polymerase III, and Mitochondrial Transcription	1	92	0.621118	1.31103	0.539453	1	1	1	POLR2E;
Regulation of Apoptosis	1	75	0.621118	1.60816	0.468361	1	1	1	PSMA4;
Regulation of activated PAK-2p34 by proteasome mediated degradation	1	66	0.621118	1.82742	0.426412	1	1	1	PSMA4;
RNA Polymerase III Transcription Initiation From Type 2 Promoter	1	20	0.621118	6.02838	0.154845	1	1	1	POLR2E;
RNA Polymerase III Transcription Initiation From Type 3 Promoter	1	22	0.621118	5.4806	0.168952	1	1	1	POLR2E;
RNA Polymerase III Transcription Initiation	1	29	0.621118	4.15815	0.216511	1	1	1	POLR2E;
RNA Polymerase III Transcription Initiation From Type 1 Promoter	1	21	0.621118	5.74146	0.161928	1	1	1	POLR2E;
RNA Polymerase III Transcription	1	34	0.621118	3.54684	0.248816	1	1	1	POLR2E;
RNA Polymerase III Abortive And Retractive Initiation	1	34	0.621118	3.54684	0.248816	1	1	1	POLR2E;
RNA Polymerase III Chain Elongation	1	12	0.621118	10.044	0.0959946	1	1	1	POLR2E;
RNA Polymerase III Transcription Termination	1	17	0.621118	7.09159	0.133236	1	1	1	POLR2E;
Cdc20:Phospho-APC/C mediated degradation of Cyclin A	1	69	0.621118	1.74798	0.440748	1	1	1	PSMA4;
Caspase-mediated cleavage of cytoskeletal proteins	1	11	0.621118	10.9562	0.0883577	1	1	1	CASP8;
Apoptotic cleavage of cellular proteins	1	39	0.621118	3.09223	0.279796	1	1	1	CASP8;
Apoptotic execution phase	1	48	0.621118	2.51256	0.332396	1	1	1	CASP8;
Caspase-8 is formed from procaspase-8	1	9	0.621118	13.3882	0.0728909	1	1	1	CASP8;
TRAIL signaling	1	6	0.621118	20.0712	0.0492005	1	0.954852	1	CASP8;
Intrinsic Pathway for Apoptosis	1	31	0.621118	3.88997	0.229595	1	1	1	CASP8;
Activation of Pro-Caspase 8	1	9	0.621118	13.3882	0.0728909	1	1	1	CASP8;
Activation, myristolyation of BID and translocation to mitochondria	1	5	0.621118	24.0774	0.0411708	1	0.880421	1	CASP8;
FasL/ CD95L signaling	1	5	0.621118	24.0774	0.0411708	1	0.880421	1	CASP8;
TNF signaling	1	7	0.621118	17.208	0.0571634	1	1	1	CASP8;
Death Receptor Signalling	1	13	0.621118	9.27194	0.103568	1	1	1	CASP8;
Extrinsic Pathway for Apoptosis	1	13	0.621118	9.27194	0.103568	1	1	1	CASP8;
Apoptosis	2	158	1.24224	1.51928	0.382179	1	1	1	PSMA4; CASP8;
Steroid hormones	1	25	0.621118	4.82319	0.189676	1	1	1	CYP11A1;
Innate Immune System	2	183	1.24224	1.31174	0.454446	1	1	1	PSTPIP1; CASP8;
Cross-presentation of soluble exogenous antigens (endosomes)	1	67	0.621118	1.80015	0.431231	1	1	1	PSMA4;
Antigen processing-Cross presentation	1	86	0.621118	1.40249	0.515511	1	1	1	PSMA4;
ER-Phagosome pathway	1	80	0.621118	1.50766	0.490333	1	1	1	PSMA4;
RIG-I/MDA5 mediated induction of IFN-alpha/beta pathways	1	67	0.621118	1.80015	0.431231	1	1	1	CASP8;
NF-kB activation through FADD/RIP-1 pathway mediated by caspase-8 and -10	1	8	0.621118	15.0597	0.06506	1	1	1	CASP8;
Cytokine Signaling in Immune system	1	193	0.621118	0.624983	0.804237	1	1	1	PML;
Interferon Signaling	1	98	0.621118	1.23077	0.562219	1	1	1	PML;
Interferon gamma signaling	1	47	0.621118	2.56601	0.326745	1	1	1	PML;
Nucleotide-binding domain, leucine rich repeat containing receptor (NLR) signaling pathways	2	43	1.24224	5.58153	0.0503012	1	0.956608	1	PSTPIP1; CASP8;
NOD1/2 Signaling Pathway	1	26	0.621118	4.63775	0.196469	1	1	1	CASP8;
The NLRP3 inflammasome	1	11	0.621118	10.9562	0.0883577	1	1	1	PSTPIP1;
Inflammasomes	1	17	0.621118	7.09159	0.133236	1	1	1	PSTPIP1;
sulfate activation for sulfonation	1	2	0.621118	60.0139	0.016675	1	0.690641	1	PAPSS2;
GDP-mannose biosynthesis	1	6	0.621118	20.0712	0.0492005	1	0.954852	1	MPI;
colanic acid building blocks biosynthesis	1	13	0.621118	9.27194	0.103568	1	1	1	MPI;
coenzyme A biosynthesis	1	7	0.621118	17.208	0.0571634	1	1	1	PPCDC;
prostanoid biosynthesis	1	9	0.621118	13.3882	0.0728909	1	1	1	PTGES;
pregnenolone biosynthesis	1	1	0.621118	119.434	0.00837233	1	0.690641	1	CYP11A1;
sphingomyelin metabolism	1	7	0.621118	17.208	0.0571634	1	1	1	SGMS1;
Rapoport-Luebering glycolytic shunt	1	4	0.621118	30.0818	0.0330737	1	0.75571	1	MINPP1;
superpathway of D-myo-inositol (1,4,5)-trisphosphate metabolism	3	20	1.86335	17.9658	0.000591386	0.986433	0.493216	1	MINPP1; INPP5F; PTEN;
D-myo-inositol (1,4,5)-trisphosphate degradation	1	13	0.621118	9.27194	0.103568	1	1	1	INPP5F;
D-myo-inositol (1,3,4)-trisphosphate biosynthesis	2	15	1.24224	15.9934	0.00680945	1	0.690641	1	MINPP1; PTEN;
D-myo-inositol (1,4,5,6)-tetrakisphosphate biosynthesis	1	3	0.621118	40.0757	0.0249086	1	0.690641	1	MINPP1;
D-mannose degradation	1	1	0.621118	119.434	0.00837233	1	0.690641	1	MPI;
3-phosphoinositide degradation	2	19	1.24224	12.6282	0.0108495	1	0.690641	1	INPP5F; PTEN;
Validated transcriptional targets of TAp63 isoforms	1	54	0.621118	2.23344	0.365323	1	1	1	PML;
Wnt signaling network	2	200	1.24224	1.20025	0.500771	1	1	1	DKK1; CASP8;
Regulation of cytoplasmic and nuclear SMAD2/3 signaling	4	305	2.48447	1.57021	0.252729	1	1	1	PML; PRKG1; SIN3A; PRKCA;
Validated targets of C-MYC transcriptional repression	1	63	0.621118	1.91443	0.411711	1	1	1	DKK1;
Signaling events mediated by the Hedgehog family	1	65	0.621118	1.85553	0.421553	1	1	1	SIN3A;
Canonical NF-kappaB pathway	1	35	0.621118	3.44553	0.255116	1	1	1	PRKCA;
Signaling events mediated by HDAC Class I	1	113	0.621118	1.06741	0.614358	1	1	1	SIN3A;
Integrins in angiogenesis	1	64	0.621118	1.88452	0.416652	1	1	1	CASP8;
Syndecan-1-mediated signaling events	18	1297	11.1801	1.65843	0.0239333	1	0.690641	1	PCK2; PML; PKM; SLIT1; CSK; PRKG1; SCAMP2; IREB2; PTEN; PRDX3; DKK1; SIN3A; CLIP1; RRAGD; PRKCA; HSPD1; CASP8; CCNB1;
Downstream signaling in na&#xef;ve CD8+ T cells	1	65	0.621118	1.85553	0.421553	1	1	1	PRKCA;
Regulation of CDC42 activity	10	768	6.21118	1.55666	0.111386	1	1	1	PCK2; PML; PKM; PRKG1; PTEN; DKK1; SIN3A; PRKCA; CASP8; RDX;
Notch-mediated HES/HEY network	1	94	0.621118	1.28314	0.54717	1	1	1	CNTN1;
Glypican pathway	18	1335	11.1801	1.61122	0.030724	1	0.75571	1	PCK2; PML; PKM; SLIT1; CSK; PRKG1; SCAMP2; IREB2; PTEN; PRDX3; DKK1; SIN3A; CLIP1; RRAGD; PRKCA; HSPD1; CASP8; CCNB1;
GMCSF-mediated signaling events	18	1289	11.1801	1.66872	0.0226633	1	0.690641	1	PCK2; PML; PKM; SLIT1; CSK; PRKG1; SCAMP2; IREB2; PTEN; PRDX3; DKK1; SIN3A; CLIP1; RRAGD; PRKCA; HSPD1; CASP8; CCNB1;
Insulin Pathway	18	1285	11.1801	1.67392	0.022048	1	0.690641	1	PCK2; PML; PKM; SLIT1; CSK; PRKG1; SCAMP2; IREB2; PTEN; PRDX3; DKK1; SIN3A; CLIP1; RRAGD; PRKCA; HSPD1; CASP8; CCNB1;
C-MYC pathway	6	149	3.72671	4.8171	0.00160952	1	0.690641	1	PML; IREB2; PRDX3; DKK1; HSPD1; CCNB1;
Stabilization and expansion of the E-cadherin adherens junction	3	275	1.86335	1.30721	0.405494	1	1	1	SLIT1; DKK1; CASP8;
Glypican 3 network	2	206	1.24224	1.16529	0.516514	1	1	1	DKK1; CASP8;
Nectin adhesion pathway	18	1292	11.1801	1.66485	0.0231333	1	0.690641	1	PCK2; PML; PKM; SLIT1; CSK; PRKG1; SCAMP2; IREB2; PTEN; PRDX3; DKK1; SIN3A; CLIP1; RRAGD; PRKCA; HSPD1; CASP8; CCNB1;
CD40/CD40L signaling	1	58	0.621118	2.07943	0.386372	1	1	1	PRKCA;
TRAIL signaling pathway	18	1325	11.1801	1.62338	0.0288112	1	0.740829	1	PCK2; PML; PKM; SLIT1; CSK; PRKG1; SCAMP2; IREB2; PTEN; PRDX3; DKK1; SIN3A; CLIP1; RRAGD; PRKCA; HSPD1; CASP8; CCNB1;
LPA receptor mediated events	1	100	0.621118	1.20616	0.569556	1	1	1	PRKCA;
IGF1 pathway	18	1288	11.1801	1.67002	0.0225082	1	0.690641	1	PCK2; PML; PKM; SLIT1; CSK; PRKG1; SCAMP2; IREB2; PTEN; PRDX3; DKK1; SIN3A; CLIP1; RRAGD; PRKCA; HSPD1; CASP8; CCNB1;
PLK1 signaling events	2	104	1.24224	2.30806	0.216485	1	1	1	PRKCA; CCNB1;
Lissencephaly gene (LIS1) in neuronal migration and development	1	31	0.621118	3.88997	0.229595	1	1	1	CLIP1;
ATF-2 transcription factor network	1	59	0.621118	2.0442	0.391525	1	1	1	PRKCA;
HIF-1-alpha transcription factor network	1	66	0.621118	1.82742	0.426412	1	1	1	PKM;
CDC42 signaling events	10	755	6.21118	1.58346	0.1026	1	1	1	PCK2; PML; PKM; PRKG1; PTEN; DKK1; SIN3A; PRKCA; CASP8; RDX;
Signaling events mediated by Hepatocyte Growth Factor Receptor (c-Met)	18	1290	11.1801	1.66743	0.0228191	1	0.690641	1	PCK2; PML; PKM; SLIT1; CSK; PRKG1; SCAMP2; IREB2; PTEN; PRDX3; DKK1; SIN3A; CLIP1; RRAGD; PRKCA; HSPD1; CASP8; CCNB1;
Glypican 1 network	18	1296	11.1801	1.65971	0.0237717	1	0.690641	1	PCK2; PML; PKM; SLIT1; CSK; PRKG1; SCAMP2; IREB2; PTEN; PRDX3; DKK1; SIN3A; CLIP1; RRAGD; PRKCA; HSPD1; CASP8; CCNB1;
Validated targets of C-MYC transcriptional activation	4	81	2.48447	5.91197	0.00477691	1	0.690641	1	IREB2; PRDX3; HSPD1; CCNB1;
N-cadherin signaling events	3	251	1.86335	1.43219	0.351038	1	1	1	SLIT1; DKK1; CASP8;
PDGF receptor signaling network	18	1290	11.1801	1.66743	0.0228191	1	0.690641	1	PCK2; PML; PKM; SLIT1; CSK; PRKG1; SCAMP2; IREB2; PTEN; PRDX3; DKK1; SIN3A; CLIP1; RRAGD; PRKCA; HSPD1; CASP8; CCNB1;
Integrin family cell surface interactions	19	1375	11.8012	1.65121	0.0213921	1	0.690641	1	PCK2; PML; PKM; CSPG4; SLIT1; CSK; PRKG1; SCAMP2; IREB2; PTEN; PRDX3; DKK1; SIN3A; CLIP1; RRAGD; PRKCA; HSPD1; CASP8; CCNB1;
IL1-mediated signaling events	2	234	1.24224	1.02586	0.585546	1	1	1	PRKG1; PRKCA;
Caspase cascade in apoptosis	1	52	0.621118	2.31932	0.354531	1	1	1	CASP8;
Coregulation of Androgen receptor activity	1	61	0.621118	1.97718	0.401703	1	1	1	CASP8;
Regulation of Telomerase	1	68	0.621118	1.77368	0.43601	1	1	1	SIN3A;
Internalization of ErbB1	18	1285	11.1801	1.67392	0.022048	1	0.690641	1	PCK2; PML; PKM; SLIT1; CSK; PRKG1; SCAMP2; IREB2; PTEN; PRDX3; DKK1; SIN3A; CLIP1; RRAGD; PRKCA; HSPD1; CASP8; CCNB1;
TGF-beta receptor signaling	4	305	2.48447	1.57021	0.252729	1	1	1	PML; PRKG1; SIN3A; PRKCA;
Posttranslational regulation of adherens junction stability and dissassembly	3	231	1.86335	1.55619	0.305266	1	1	1	SLIT1; DKK1; CASP8;
BCR signaling pathway	2	67	1.24224	3.58247	0.108371	1	1	1	CSK; PTEN;
Signaling events mediated by VEGFR1 and VEGFR2	18	1293	11.1801	1.66356	0.0232917	1	0.690641	1	PCK2; PML; PKM; SLIT1; CSK; PRKG1; SCAMP2; IREB2; PTEN; PRDX3; DKK1; SIN3A; CLIP1; RRAGD; PRKCA; HSPD1; CASP8; CCNB1;
Beta1 integrin cell surface interactions	19	1348	11.8012	1.68429	0.0177848	1	0.690641	1	PCK2; PML; PKM; CSPG4; SLIT1; CSK; PRKG1; SCAMP2; IREB2; PTEN; PRDX3; DKK1; SIN3A; CLIP1; RRAGD; PRKCA; HSPD1; CASP8; CCNB1;
Thromboxane A2 receptor signaling	2	54	1.24224	4.44476	0.0751522	1	1	1	PRKG1; PRKCA;
Urokinase-type plasminogen activator (uPA) and uPAR-mediated signaling	18	1285	11.1801	1.67392	0.022048	1	0.690641	1	PCK2; PML; PKM; SLIT1; CSK; PRKG1; SCAMP2; IREB2; PTEN; PRDX3; DKK1; SIN3A; CLIP1; RRAGD; PRKCA; HSPD1; CASP8; CCNB1;
Ras signaling in the CD4+ TCR pathway	1	42	0.621118	2.87141	0.297772	1	1	1	PRKCA;
TCR signaling in na&#xef;ve CD8+ T cells	2	127	1.24224	1.8901	0.28767	1	1	1	CSK; PRKCA;
Ceramide signaling pathway	1	49	0.621118	2.46129	0.337999	1	1	1	CASP8;
Signaling by Aurora kinases	1	98	0.621118	1.23077	0.562219	1	1	1	PRKCA;
Polo-like kinase signaling events in the cell cycle	2	109	1.24224	2.2022	0.231887	1	1	1	PRKCA; CCNB1;
IFN-gamma pathway	18	1293	11.1801	1.66356	0.0232917	1	0.690641	1	PCK2; PML; PKM; SLIT1; CSK; PRKG1; SCAMP2; IREB2; PTEN; PRDX3; DKK1; SIN3A; CLIP1; RRAGD; PRKCA; HSPD1; CASP8; CCNB1;
Regulation of RAC1 activity	3	205	1.86335	1.75355	0.246355	1	1	1	PTEN; PRKCA; RDX;
PAR1-mediated thrombin signaling events	18	1296	11.1801	1.65971	0.0237717	1	0.690641	1	PCK2; PML; PKM; SLIT1; CSK; PRKG1; SCAMP2; IREB2; PTEN; PRDX3; DKK1; SIN3A; CLIP1; RRAGD; PRKCA; HSPD1; CASP8; CCNB1;
Noncanonical Wnt signaling pathway	2	182	1.24224	1.31895	0.451645	1	1	1	DKK1; CASP8;
Regulation of p38-alpha and p38-beta	2	164	1.24224	1.4637	0.399923	1	1	1	PRKG1; PRKCA;
VEGFR1 specific signals	1	29	0.621118	4.15815	0.216511	1	1	1	PRKCA;
PDGFR-beta signaling pathway	18	1285	11.1801	1.67392	0.022048	1	0.690641	1	PCK2; PML; PKM; SLIT1; CSK; PRKG1; SCAMP2; IREB2; PTEN; PRDX3; DKK1; SIN3A; CLIP1; RRAGD; PRKCA; HSPD1; CASP8; CCNB1;
p63 transcription factor network	1	105	0.621118	1.14873	0.587369	1	1	1	PML;
Canonical Wnt signaling pathway	2	155	1.24224	1.54868	0.373225	1	1	1	DKK1; CASP8;
E-cadherin signaling in the nascent adherens junction	3	275	1.86335	1.30721	0.405494	1	1	1	SLIT1; DKK1; CASP8;
Integrin-linked kinase signaling	9	654	5.59006	1.64538	0.0990066	1	1	1	PCK2; PML; PKM; PRKG1; PTEN; DKK1; SIN3A; PRKCA; CASP8;
Regulation of nuclear beta catenin signaling and target gene transcription	2	135	1.24224	1.7781	0.312391	1	1	1	DKK1; CASP8;
p38 MAPK signaling pathway	2	189	1.24224	1.2701	0.471078	1	1	1	PRKG1; PRKCA;
EGF receptor (ErbB1) signaling pathway	18	1285	11.1801	1.67392	0.022048	1	0.690641	1	PCK2; PML; PKM; SLIT1; CSK; PRKG1; SCAMP2; IREB2; PTEN; PRDX3; DKK1; SIN3A; CLIP1; RRAGD; PRKCA; HSPD1; CASP8; CCNB1;
p75(NTR)-mediated signaling	2	178	1.24224	1.34858	0.440362	1	1	1	LINGO1; PRKCA;
Thrombin/protease-activated receptor (PAR) pathway	18	1297	11.1801	1.65843	0.0239333	1	0.690641	1	PCK2; PML; PKM; SLIT1; CSK; PRKG1; SCAMP2; IREB2; PTEN; PRDX3; DKK1; SIN3A; CLIP1; RRAGD; PRKCA; HSPD1; CASP8; CCNB1;
Class I PI3K signaling events	18	1285	11.1801	1.67392	0.022048	1	0.690641	1	PCK2; PML; PKM; SLIT1; CSK; PRKG1; SCAMP2; IREB2; PTEN; PRDX3; DKK1; SIN3A; CLIP1; RRAGD; PRKCA; HSPD1; CASP8; CCNB1;
Arf6 signaling events	18	1285	11.1801	1.67392	0.022048	1	0.690641	1	PCK2; PML; PKM; SLIT1; CSK; PRKG1; SCAMP2; IREB2; PTEN; PRDX3; DKK1; SIN3A; CLIP1; RRAGD; PRKCA; HSPD1; CASP8; CCNB1;
Plasma membrane estrogen receptor signaling	18	1298	11.1801	1.65715	0.0240959	1	0.690641	1	PCK2; PML; PKM; SLIT1; CSK; PRKG1; SCAMP2; IREB2; PTEN; PRDX3; DKK1; SIN3A; CLIP1; RRAGD; PRKCA; HSPD1; CASP8; CCNB1;
FoxO family signaling	1	49	0.621118	2.46129	0.337999	1	1	1	CCNB1;
IL2-mediated signaling events	3	115	1.86335	3.12577	0.0722634	1	1	1	SGMS1; EIF3A; PRKCA;
FAS (CD95) signaling pathway	2	130	1.24224	1.84649	0.296956	1	1	1	PRKCA; CASP8;
C-MYB transcription factor network	2	84	1.24224	2.85754	0.156273	1	1	1	SIN3A; CCNB1;
p73 transcription factor network	2	78	1.24224	3.07732	0.138911	1	1	1	PML; CCNB1;
FOXM1 transcription factor network	1	42	0.621118	2.87141	0.297772	1	1	1	CCNB1;
IL3-mediated signaling events	18	1292	11.1801	1.66485	0.0231333	1	0.690641	1	PCK2; PML; PKM; SLIT1; CSK; PRKG1; SCAMP2; IREB2; PTEN; PRDX3; DKK1; SIN3A; CLIP1; RRAGD; PRKCA; HSPD1; CASP8; CCNB1;
AP-1 transcription factor network	9	621	5.59006	1.73282	0.0776616	1	1	1	PCK2; PML; PKM; PRKG1; PTEN; DKK1; SIN3A; PRKCA; CASP8;
Signaling events regulated by Ret tyrosine kinase	1	69	0.621118	1.74798	0.440748	1	1	1	PRKCA;
Hypoxic and oxygen homeostasis regulation of HIF-1-alpha	1	80	0.621118	1.50766	0.490333	1	1	1	PKM;
Glucocorticoid receptor signaling	1	85	0.621118	1.41899	0.511403	1	1	1	PCK2;
Hedgehog signaling events mediated by Gli proteins	1	48	0.621118	2.51256	0.332396	1	1	1	SIN3A;
mTOR signaling pathway	18	1285	11.1801	1.67392	0.022048	1	0.690641	1	PCK2; PML; PKM; SLIT1; CSK; PRKG1; SCAMP2; IREB2; PTEN; PRDX3; DKK1; SIN3A; CLIP1; RRAGD; PRKCA; HSPD1; CASP8; CCNB1;
RAC1 signaling pathway	3	205	1.86335	1.75355	0.246355	1	1	1	PTEN; PRKCA; RDX;
ErbB receptor signaling network	19	1308	11.8012	1.73579	0.0133368	1	0.690641	1	PCK2; PML; PKM; SLIT1; CSK; PRKG1; SCAMP2; IREB2; PTEN; PRDX3; DKK1; NRG4; SIN3A; CLIP1; RRAGD; PRKCA; HSPD1; CASP8; CCNB1;
Signaling events mediated by focal adhesion kinase	18	1285	11.1801	1.67392	0.022048	1	0.690641	1	PCK2; PML; PKM; SLIT1; CSK; PRKG1; SCAMP2; IREB2; PTEN; PRDX3; DKK1; SIN3A; CLIP1; RRAGD; PRKCA; HSPD1; CASP8; CCNB1;
VEGF and VEGFR signaling network	18	1301	11.1801	1.65333	0.0245885	1	0.690641	1	PCK2; PML; PKM; SLIT1; CSK; PRKG1; SCAMP2; IREB2; PTEN; PRDX3; DKK1; SIN3A; CLIP1; RRAGD; PRKCA; HSPD1; CASP8; CCNB1;
Glucocorticoid receptor regulatory network	1	80	0.621118	1.50766	0.490333	1	1	1	PCK2;
Alpha9 beta1 integrin signaling events	18	1302	11.1801	1.65206	0.0247544	1	0.690641	1	PCK2; PML; PKM; SLIT1; CSK; PRKG1; SCAMP2; IREB2; PTEN; PRDX3; DKK1; SIN3A; CLIP1; RRAGD; PRKCA; HSPD1; CASP8; CCNB1;
IL8- and CXCR1-mediated signaling events	1	28	0.621118	4.3066	0.209886	1	1	1	PRKCA;
Signaling events mediated by Stem cell factor receptor (c-Kit)	1	52	0.621118	2.31932	0.354531	1	1	1	PTEN;
ALK1 pathway	4	324	2.48447	1.47813	0.287862	1	1	1	PML; PRKG1; SIN3A; PRKCA;
ErbB4 signaling events	1	32	0.621118	3.76845	0.236056	1	1	1	NRG4;
Arf6 downstream pathway	18	1285	11.1801	1.67392	0.022048	1	0.690641	1	PCK2; PML; PKM; SLIT1; CSK; PRKG1; SCAMP2; IREB2; PTEN; PRDX3; DKK1; SIN3A; CLIP1; RRAGD; PRKCA; HSPD1; CASP8; CCNB1;
Role of Calcineurin-dependent NFAT signaling in lymphocytes	1	95	0.621118	1.26963	0.55098	1	1	1	PRKCA;
HIV-1 Nef: Negative effector of Fas and TNF-alpha	1	35	0.621118	3.44553	0.255116	1	1	1	CASP8;
Signaling events mediated by PTP1B	1	52	0.621118	2.31932	0.354531	1	1	1	CSK;
Validated transcriptional targets of AP1 family members Fra1 and Fra2	1	134	0.621118	0.900142	0.677143	1	1	1	PRKCA;
CXCR4-mediated signaling events	3	190	1.86335	1.89198	0.213266	1	1	1	CSK; PTEN; PRKCA;
S1P1 pathway	18	1285	11.1801	1.67392	0.022048	1	0.690641	1	PCK2; PML; PKM; SLIT1; CSK; PRKG1; SCAMP2; IREB2; PTEN; PRDX3; DKK1; SIN3A; CLIP1; RRAGD; PRKCA; HSPD1; CASP8; CCNB1;
Alpha-synuclein signaling	1	33	0.621118	3.65429	0.242462	1	1	1	GRK5;
Netrin-mediated signaling events	1	32	0.621118	3.76845	0.236056	1	1	1	NTN1;
ATM pathway	4	307	2.48447	1.55998	0.256386	1	1	1	PML; PTEN; DKK1; CCNB1;
TNF receptor signaling pathway	3	299	1.86335	1.20229	0.45858	1	1	1	PRKG1; PRKCA; CASP8;
p53 pathway	4	189	2.48447	2.53388	0.0746395	1	1	1	PML; PTEN; DKK1; CCNB1;
ErbB1 downstream signaling	18	1285	11.1801	1.67392	0.022048	1	0.690641	1	PCK2; PML; PKM; SLIT1; CSK; PRKG1; SCAMP2; IREB2; PTEN; PRDX3; DKK1; SIN3A; CLIP1; RRAGD; PRKCA; HSPD1; CASP8; CCNB1;
EGFR-dependent Endothelin signaling events	18	1286	11.1801	1.67262	0.0222006	1	0.690641	1	PCK2; PML; PKM; SLIT1; CSK; PRKG1; SCAMP2; IREB2; PTEN; PRDX3; DKK1; SIN3A; CLIP1; RRAGD; PRKCA; HSPD1; CASP8; CCNB1;
Syndecan-4-mediated signaling events	3	209	1.86335	1.71999	0.255318	1	1	1	DKK1; PRKCA; CASP8;
IL8-mediated signaling events	1	38	0.621118	3.17359	0.273704	1	1	1	PRKCA;
ATR signaling pathway	4	250	2.48447	1.91564	0.158195	1	1	1	PML; PTEN; DKK1; CCNB1;
Regulation of nuclear SMAD2/3 signaling	4	305	2.48447	1.57021	0.252729	1	1	1	PML; PRKG1; SIN3A; PRKCA;
ALK1 signaling events	4	321	2.48447	1.49194	0.282262	1	1	1	PML; PRKG1; SIN3A; PRKCA;
Arf6 trafficking events	18	1285	11.1801	1.67392	0.022048	1	0.690641	1	PCK2; PML; PKM; SLIT1; CSK; PRKG1; SCAMP2; IREB2; PTEN; PRDX3; DKK1; SIN3A; CLIP1; RRAGD; PRKCA; HSPD1; CASP8; CCNB1;
E-cadherin signaling events	3	280	1.86335	1.28387	0.416693	1	1	1	SLIT1; DKK1; CASP8;
Androgen-mediated signaling	1	130	0.621118	0.927836	0.666023	1	1	1	CASP8;
Endothelins	18	1304	11.1801	1.64953	0.0250888	1	0.690641	1	PCK2; PML; PKM; SLIT1; CSK; PRKG1; SCAMP2; IREB2; PTEN; PRDX3; DKK1; SIN3A; CLIP1; RRAGD; PRKCA; HSPD1; CASP8; CCNB1;
Presenilin action in Notch and Wnt signaling	1	46	0.621118	2.62178	0.321047	1	1	1	DKK1;
a6b1 and a6b4 Integrin signaling	1	35	0.621118	3.44553	0.255116	1	1	1	PRKCA;
TCR signaling in na&#xef;ve CD4+ T cells	3	133	1.86335	2.70277	0.100927	1	1	1	CSK; PTEN; PRKCA;
Notch signaling pathway	1	94	0.621118	1.28314	0.54717	1	1	1	CNTN1;
IL5-mediated signaling events	18	1289	11.1801	1.66872	0.0226633	1	0.690641	1	PCK2; PML; PKM; SLIT1; CSK; PRKG1; SCAMP2; IREB2; PTEN; PRDX3; DKK1; SIN3A; CLIP1; RRAGD; PRKCA; HSPD1; CASP8; CCNB1;
IL23-mediated signaling events	1	66	0.621118	1.82742	0.426412	1	1	1	PRKCA;
Direct p53 effectors	4	138	2.48447	3.47025	0.0288692	1	0.740829	1	PML; PTEN; DKK1; CCNB1;
Retinoic acid receptors-mediated signaling	1	47	0.621118	2.56601	0.326745	1	1	1	PRKCA;
IL12-mediated signaling events	1	111	0.621118	1.08664	0.60778	1	1	1	PRKCA;
IL2 signaling events mediated by PI3K	3	67	1.86335	5.3648	0.0186686	1	0.690641	1	SGMS1; EIF3A; PRKCA;
Sphingosine 1-phosphate (S1P) pathway	18	1308	11.1801	1.64448	0.0257679	1	0.693239	1	PCK2; PML; PKM; SLIT1; CSK; PRKG1; SCAMP2; IREB2; PTEN; PRDX3; DKK1; SIN3A; CLIP1; RRAGD; PRKCA; HSPD1; CASP8; CCNB1;
Regulation of Androgen receptor activity	1	108	0.621118	1.11682	0.597703	1	1	1	CASP8;
Proteoglycan syndecan-mediated signaling events	18	1342	11.1801	1.60282	0.0321186	1	0.75571	1	PCK2; PML; PKM; SLIT1; CSK; PRKG1; SCAMP2; IREB2; PTEN; PRDX3; DKK1; SIN3A; CLIP1; RRAGD; PRKCA; HSPD1; CASP8; CCNB1;
IL8- and CXCR2-mediated signaling events	1	34	0.621118	3.54684	0.248816	1	1	1	PRKCA;
BMP receptor signaling	2	226	1.24224	1.06217	0.566582	1	1	1	PRKG1; PRKCA;
Endogenous TLR signaling	2	57	1.24224	4.21087	0.0824882	1	1	1	PRKCA; HSPD1;
Aurora A signaling	1	64	0.621118	1.88452	0.416652	1	1	1	PRKCA;
RhoA signaling pathway	3	205	1.86335	1.75355	0.246355	1	1	1	PTEN; PRKCA; RDX;
Class I PI3K signaling events mediated by Akt	18	1285	11.1801	1.67392	0.022048	1	0.690641	1	PCK2; PML; PKM; SLIT1; CSK; PRKG1; SCAMP2; IREB2; PTEN; PRDX3; DKK1; SIN3A; CLIP1; RRAGD; PRKCA; HSPD1; CASP8; CCNB1;
LKB1 signaling events	18	1305	11.1801	1.64826	0.0252572	1	0.690641	1	PCK2; PML; PKM; SLIT1; CSK; PRKG1; SCAMP2; IREB2; PTEN; PRDX3; DKK1; SIN3A; CLIP1; RRAGD; PRKCA; HSPD1; CASP8; CCNB1;
Regulation of RhoA activity	3	205	1.86335	1.75355	0.246355	1	1	1	PTEN; PRKCA; RDX;
AndrogenReceptor	2	78	1.24224	3.07732	0.138911	1	1	1	PTEN; SIN3A;
Wnt	2	82	1.24224	2.92722	0.150439	1	1	1	DKK1; PRKCA;
KitReceptor	1	54	0.621118	2.23344	0.365323	1	1	1	PRKCA;
Hedgehog	2	16	1.24224	14.9945	0.0077397	1	0.690641	1	SIN3A; CCNB1;
Alpha6Beta4Integrin	1	48	0.621118	2.51256	0.332396	1	1	1	PRKCA;
TNF alpha/NF-kB	2	171	1.24224	1.40379	0.42032	1	1	1	PML; CASP8;
EGFR1	2	138	1.24224	1.73945	0.321619	1	1	1	CSK; PRKCA;
NOTCH	1	57	0.621118	2.11591	0.381176	1	1	1	SIN3A;
Epithelial-to-mesenchymal transition	2	185	1.24224	1.29756	0.460023	1	1	1	ISLR; SPOCK1;

## Sheet: Protein domain
Analysis: Protein domain
Dataset name: Racing
Number of genes in the dataset: 161
Number of genes in the dataset (which are available in Protein domain database) :125
Number of genes in background: 19230
Is analysis quantitative: No
						Corrected p-values
Protein domain	No. of genes in the dataset	No.of genes in the background dataset	Percentage of genes	Fold enrichment	P-value (Hypergeometric test)	Bonferroni method	BH method	Q-value (Storey-Tibshirani method)
coiled coil region	30	2968	18.6335	1.20761	0.154122	1	1	1	ATAD1; ZWINT; C15orf59; PSTPIP1; CPLX3; LMAN1L; UBE2Q2; PSMA4; CHRNA3; CCDC33; PRKG1; INPP5F; SCAMP2; MYO9A; SCAPER; EIF3A; LRRC49; HECW1; PCLO; ABCC9; CLIP1; RILPL2; MEI4; ANKRD6; PKP4; HSPD1; ALS2CR12; CENPH; PACSIN2; RDX;
UBCc	1	42	0.621118	2.87141	0.297772	1	1	1	UBE2Q2;
signal peptide	29	3668	18.0124	0.944591	0.665807	1	1	1	SEMA7A; CHRNB4; NPTN; LMAN1L; CHRNA3; CSPG4; SLIT1; MINPP1; FAM45A; TSPAN3; RCN2; STRA6; DKK1; ADPGK; CHRNA5; LOXL1; NEO1; VWC2; ZPBP; CNTN1; IL31; NTN1; SPOCK1; LCN15; ACER3; TSKU; ST3GAL4; LRRC32; KIRREL3;
transmembrane domain	33	4771	20.4969	0.826346	0.916057	1	1	1	SGMS1; CHRNB4; PRLHR; LINGO1; NPTN; CYP1A2; CHRNA3; TMEM202; CSPG4; CYP1A1; TSPAN3; SCAMP2; STRA6; SCAMP5; NRG4; CHRNA5; NEO1; COA1; ZPBP; ST7L; TSPAN9; GOLT1B; ABCC9; TMEM71; SYT3; GPR142; TMEM98; MGAT5; PTGES; ACER3; B3GNT6; LRRC32; KIRREL3;
TPR	2	93	1.24224	2.58103	0.18301	1	1	1	BBS4; TANC2;
WW	2	49	1.24224	4.89822	0.0634331	1	1	1	BAG3; HECW1;
RhoGAP	2	65	1.24224	3.69269	0.103034	1	1	1	MYO9A; ARHGAP20;
IG	5	340	3.10559	1.75984	0.157223	1	1	1	SEMA7A; NPTN; NEO1; CNTN1; KIRREL3;
PTPc_DSPc	1	16	0.621118	7.53454	0.125912	1	1	1	PTEN;
ZnF_U1	1	26	0.621118	4.63775	0.196469	1	1	1	SCAPER;
ZnF_C2H2	1	799	0.621118	0.150972	0.998953	1	1	1	SCAPER;
TBC	1	50	0.621118	2.41208	0.343556	1	1	1	TBC1D21;
EFh	2	144	1.24224	1.66698	0.339981	1	1	1	RCN2; CIB4;
S_TKc	6	307	3.72671	2.33802	0.0447665	1	1	1	PRKG1; ULK3; CLK3; GRK5; STK17A; PRKCA;
PINT	1	16	0.621118	7.53454	0.125912	1	1	1	EIF3A;
DEXDc	2	112	1.24224	2.14322	0.241162	1	1	1	DDX11; YTHDC2;
HELICc	2	111	1.24224	2.16252	0.238068	1	1	1	DDX11; YTHDC2;
Proteasome_A_N	1	8	0.621118	15.0597	0.06506	1	1	1	PSMA4;
RRM	3	221	1.86335	1.6266	0.282457	1	1	1	CSTF2T; TIAL1; A1CF;
Sema	1	30	0.621118	4.01959	0.223081	1	1	1	SEMA7A;
PSI	1	44	0.621118	2.74092	0.309507	1	1	1	SEMA7A;
RING	2	311	1.24224	0.771877	0.737154	1	1	1	PML; ARIH1;
SH3	4	216	2.48447	2.21716	0.108157	1	1	1	PSTPIP1; CSK; SNX33; PACSIN2;
LRRNT	5	99	3.10559	6.04346	0.00146808	1	0.71202	1	ISLR; LINGO1; SLIT1; TSKU; LRRC32;
LRR	6	233	3.72671	3.08054	0.0138201	1	1	1	ISLR; LINGO1; SLIT1; LRRC49; TSKU; LRRC32;
LRR_TYP	5	132	3.10559	4.53271	0.00509647	1	1	1	ISLR; LINGO1; SLIT1; TSKU; LRRC32;
LRRCT	3	90	1.86335	3.99395	0.0398824	1	1	1	ISLR; LINGO1; SLIT1;
IGc2	6	211	3.72671	3.40172	0.00878152	1	1	1	ISLR; LINGO1; NPTN; NEO1; CNTN1; KIRREL3;
IG_like	2	128	1.24224	1.87533	0.290767	1	1	1	NPTN; ZPBP;
ANK	4	249	2.48447	1.92333	0.156614	1	1	1	ANKRD6; TANC2; YTHDC2; INVS;
FN3	2	187	1.24224	1.28368	0.465567	1	1	1	NEO1; CNTN1;
BTB	1	179	0.621118	0.673862	0.77953	1	1	1	KLHL29;
FERM_C	1	27	0.621118	4.46605	0.203206	1	1	1	RDX;
HLH	1	116	0.621118	1.03981	0.62402	1	1	1	MLXIP;
ZnF_C4	1	46	0.621118	2.62178	0.321047	1	1	1	NR2E3;
HOLI	1	48	0.621118	2.51256	0.332396	1	1	1	NR2E3;
WD40	2	269	1.24224	0.892389	0.661292	1	1	1	DCAF11; WDR61;
RGS	2	35	1.24224	6.85694	0.0346054	1	1	1	RGS10; GRK5;
EGF	2	208	1.24224	1.15409	0.521689	1	1	1	SLIT1; NRG4;
UBQ	1	45	0.621118	2.68003	0.315301	1	1	1	UBL7;
EGF_CA	1	98	0.621118	1.23077	0.562219	1	1	1	SLIT1;
VWC	1	38	0.621118	3.17359	0.273704	1	1	1	VWC2;
AAA	2	145	1.24224	1.65548	0.343027	1	1	1	ATAD1; ABCC9;
IQ	2	84	1.24224	2.85754	0.156273	1	1	1	MYO9A; INVS;
CYCLIN	1	37	0.621118	3.25933	0.26756	1	1	1	CCNB1;
HOX	1	234	0.621118	0.515482	0.861854	1	1	1	ISL2;
PDZ	1	150	0.621118	0.804133	0.718062	1	1	1	PCLO;
B41	1	51	0.621118	2.36479	0.349066	1	1	1	RDX;
RAB	1	64	0.621118	1.88452	0.416652	1	1	1	RAB35;
PH	1	278	0.621118	0.433898	0.905047	1	1	1	ARHGAP20;
S_TK_X	3	56	1.86335	6.41841	0.0115448	1	1	1	PRKG1; GRK5; PRKCA;
BBOX	1	72	0.621118	1.67516	0.454728	1	1	1	PML;
C2	6	138	3.72671	5.20104	0.00108613	1	0.71202	1	CCDC33; RAB11FIP2; HECW1; PCLO; SYT3; PRKCA;
HECTc	1	28	0.621118	4.3066	0.209886	1	1	1	HECW1;
Kelch	1	58	0.621118	2.07943	0.386372	1	1	1	KLHL29;
LIM	2	73	1.24224	3.28806	0.124799	1	1	1	ISL2; ABLIM3;
SEC14	1	26	0.621118	4.63775	0.196469	1	1	1	PTPN9;
Cyclin_C	1	17	0.621118	7.09159	0.133236	1	1	1	CCNB1;
DnaJ	1	50	0.621118	2.41208	0.343556	1	1	1	DNAJA4;
SH2	1	111	0.621118	1.08664	0.60778	1	1	1	CSK;
TyrKc	1	88	0.621118	1.37062	0.523626	1	1	1	CSK;
PTPc	1	37	0.621118	3.25933	0.26756	1	1	1	PTPN9;
MIT	1	10	0.621118	12.0507	0.0806566	1	1	1	ULK3;
ARM	1	29	0.621118	4.15815	0.216511	1	1	1	PKP4;
BRLZ	1	52	0.621118	2.31932	0.354531	1	1	1	NRL;
SAM	2	92	1.24224	2.60908	0.180005	1	1	1	SGMS1; SEC23IP;
CT	1	21	0.621118	5.74146	0.161928	1	1	1	SLIT1;
PX	1	45	0.621118	2.68003	0.315301	1	1	1	SNX33;
FCH	2	20	1.24224	11.9971	0.0119892	1	1	1	PSTPIP1; PACSIN2;
ZnF_C2HC	1	42	0.621118	2.87141	0.297772	1	1	1	CLIP1;
HA2	1	18	0.621118	6.69783	0.140499	1	1	1	YTHDC2;
KAZAL	1	47	0.621118	2.56601	0.326745	1	1	1	SPOCK1;
BACK	1	61	0.621118	1.97718	0.401703	1	1	1	KLHL29;
small_GTPase	1	35	0.621118	3.44553	0.255116	1	1	1	RABL6;
C1	2	67	1.24224	3.58247	0.108371	1	1	1	MYO9A; PRKCA;
RA	1	31	0.621118	3.88997	0.229595	1	1	1	MYO9A;
MYSc	1	38	0.621118	3.17359	0.273704	1	1	1	MYO9A;
CASc	1	14	0.621118	8.61013	0.111078	1	1	1	CASP8;
cNMP	1	34	0.621118	3.54684	0.248816	1	1	1	PRKG1;
VHP	1	8	0.621118	15.0597	0.06506	1	1	1	ABLIM3;
PHB	1	11	0.621118	10.9562	0.0883577	1	1	1	STOML1;
EGF_Lam	1	33	0.621118	3.65429	0.242462	1	1	1	NTN1;
DED	1	7	0.621118	17.208	0.0571634	1	1	1	CASP8;
RWD	1	11	0.621118	10.9562	0.0883577	1	1	1	UBE2Q2;
ETF	1	2	0.621118	60.0139	0.016675	1	1	1	ETFA;
LamG	2	44	1.24224	5.45471	0.052414	1	1	1	CSPG4; SLIT1;
CRAL_TRIO_N	1	12	0.621118	10.044	0.0959946	1	1	1	PTPN9;
IBR	1	15	0.621118	8.03651	0.118526	1	1	1	ARIH1;
H2TH	1	3	0.621118	40.0757	0.0249086	1	1	1	NEIL1;
FOLN	1	11	0.621118	10.9562	0.0883577	1	1	1	SLIT1;
UBA	1	32	0.621118	3.76845	0.236056	1	1	1	UBL7;
TY	1	17	0.621118	7.09159	0.133236	1	1	1	SPOCK1;
CAP_GLY	1	10	0.621118	12.0507	0.0806566	1	1	1	CLIP1;
LamNT	1	16	0.621118	7.53454	0.125912	1	1	1	NTN1;
C345C	1	17	0.621118	7.09159	0.133236	1	1	1	NTN1;
BRIGHT	1	15	0.621118	8.03651	0.118526	1	1	1	ARID3B;
ARID	1	15	0.621118	8.03651	0.118526	1	1	1	ARID3B;
Fapy_DNA_glyco	1	1	0.621118	119.434	0.00837233	1	1	1	NEIL1;
PTEN_C2	1	8	0.621118	15.0597	0.06506	1	1	1	PTEN;
DEXDc2	1	3	0.621118	40.0757	0.0249086	1	1	1	DDX11;
HELICc2	1	2	0.621118	60.0139	0.016675	1	1	1	DDX11;
DDHD	1	6	0.621118	20.0712	0.0492005	1	1	1	SEC23IP;
RRM_2	1	17	0.621118	7.09159	0.133236	1	1	1	TIAL1;
LSM14	1	3	0.621118	40.0757	0.0249086	1	1	1	EDC3;
FDF	1	3	0.621118	40.0757	0.0249086	1	1	1	EDC3;
BAG	1	5	0.621118	24.0774	0.0411708	1	1	1	BAG3;
HDAC_interact	1	2	0.621118	60.0139	0.016675	1	1	1	SIN3A;
Alpha-mann_mid	1	5	0.621118	24.0774	0.0411708	1	1	1	MAN2C1;
Cpn10	1	1	0.621118	119.434	0.00837233	1	1	1	HSPE1;

## Sheet: Site of expression
Analysis: Site of expression
Dataset name: Racing
Number of genes in the dataset: 161
Number of genes in the dataset (which are available in Site of expression database) :157
Number of genes in background: 19230
Is analysis quantitative: No
						Corrected p-values
Site of expression	No. of genes in the dataset	No.of genes in the background dataset	Percentage of genes	Fold enrichment	P-value (Hypergeometric test)	Bonferroni method	BH method	Q-value (Storey-Tibshirani method)
T cells	20	1726	12.4224	1.38462	0.0854019	1	0.90526	1	COX5A; SEMA7A; ETFA; PSTPIP1; PML; CSTF2T; PKM; TIAL1; CSK; TSPAN3; PRDX3; EDC3; EIF3A; RGS10; SIN3A; HSPD1; HSPE1; POLR2E; POU2AF1; RPS28;
Monocyte	26	2842	16.1491	1.09305	0.343755	1	1	1	PCK2; COX5A; ATAD1; SEC23IP; ETFA; BAG3; PKM; NPTN; PSMA4; CSK; COMMD4; SCAMP2; RCN2; PRDX3; EDC3; ADPGK; EIF3A; RGS10; SIN3A; GOLT1B; RAB35; PRPSAP1; PDHX; YTHDC2; HSPE1; PACSIN2;
MDA468	7	760	4.34783	1.1016	0.453167	1	1	1	PKM; PRDX3; DKK1; EIF3A; HSPE1; PACSIN2; RDX;
Small intestine	72	8360	44.7205	1.02876	0.403713	1	1	1	PCK2; DCAF11; COX5A; SEMA7A; ZWINT; NEIL1; ETFA; ISLR; PML; BAG3; PKM; PSMA4; CHRNA3; A1CF; CSPG4; MPI; MINPP1; ARID3B; CSK; CYP1A1; TSPAN3; PRKG1; UBL7; INPP5F; SCAMP2; CRABP1; PARP6; MYO9A; PTEN; PRDX3; CYP11A1; SNUPN; DKK1; ARIH1; STOML1; NRG4; EIF3A; PEAK1; RGS10; GRK5; DNAJA4; SIN3A; NEO1; HECW1; COA1; PCLO; DDX11; TSPAN9; ABCC9; MLXIP; IL31; CLIP1; RILPL2; ANKRD6; GPR142; PRKCA; TANC2; NTN1…
Breast cancer	60	7467	37.2671	0.95985	0.686186	1	1	1	PCK2; DCAF11; COX5A; ZWINT; ETFA; PML; BAG3; PKM; CYP1A2; PSMA4; CHRNA3; CSPG4; MPI; MINPP1; CSK; CYP1A1; TSPAN3; PRKG1; SCAMP2; CRABP1; PARP6; PTEN; PRDX3; CYP11A1; SNUPN; DKK1; ARIH1; NRG4; PEAK1; RGS10; GRK5; DNAJA4; SIN3A; NEO1; HECW1; COA1; PCLO; TSPAN9; ABCC9; CNTN1; MLXIP; IL31; CLIP1; RILPL2; ANKRD6; GPR142; PRKCA; TANC2; ABLIM3; SPOCK1; MGAT5; HSPD1; HSPE1; CASP8; ALS2CR12; MRPS36; CCNB1…
Thyroid cancer	58	7281	36.0248	0.951564	0.712171	1	1	1	PCK2; DCAF11; COX5A; ZWINT; ETFA; PML; BAG3; PKM; PSMA4; CHRNA3; CSPG4; MPI; MINPP1; CSK; CYP1A1; TSPAN3; PRKG1; SCAMP2; CRABP1; PARP6; PTEN; PRDX3; SNUPN; DKK1; ARIH1; NRG4; PEAK1; RGS10; GRK5; DNAJA4; SIN3A; NEO1; HECW1; COA1; PCLO; TSPAN9; ABCC9; CNTN1; MLXIP; IL31; CLIP1; RILPL2; ANKRD6; GPR142; PRKCA; TANC2; ABLIM3; SPOCK1; MGAT5; HSPD1; HSPE1; CASP8; ALS2CR12; MRPS36; CCNB1; RDX; TSKU; POU2…
Colon	72	8429	44.7205	1.02034	0.439846	1	1	1	PCK2; DCAF11; COX5A; ZWINT; ETFA; ISLR; PML; BAG3; PKM; PSMA4; CHRNA3; A1CF; CSPG4; MPI; SLIT1; MINPP1; ARID3B; CSK; CYP1A1; TSPAN3; PRKG1; UBL7; INPP5F; SCAMP2; CRABP1; PARP6; MYO9A; PTEN; PRDX3; CYP11A1; SNUPN; DKK1; ARIH1; STOML1; NRG4; EIF3A; PEAK1; RGS10; GRK5; DNAJA4; SIN3A; NEO1; HECW1; COA1; PCLO; DDX11; TSPAN9; MLXIP; IL31; CLIP1; RILPL2; ANKRD6; GPR142; PRKCA; TANC2; NTN1; ABLIM3; SPOCK…
Parathyroid gland	45	5997	27.9503	0.896398	0.835198	1	1	1	DCAF11; COX5A; ZWINT; ETFA; PML; BAG3; PKM; PSMA4; CSPG4; MINPP1; CSK; CYP1A1; PRKG1; SCAMP2; CRABP1; PARP6; SNUPN; DKK1; ARIH1; NRG4; PEAK1; RGS10; GRK5; DNAJA4; NEO1; COA1; PCLO; TSPAN9; ABCC9; CNTN1; MLXIP; CLIP1; ANKRD6; GPR142; TANC2; ABLIM3; SPOCK1; MGAT5; HSPD1; HSPE1; CASP8; MRPS36; RDX; TSKU; POU2AF1;
Cervix, uterine	53	6391	32.9193	0.990638	0.563635	1	1	1	DCAF11; COX5A; ZWINT; ETFA; PML; BAG3; PKM; PSMA4; CHRNA3; CSPG4; MPI; MINPP1; CSK; CYP1A1; PRKG1; SCAMP2; CRABP1; PARP6; PTEN; PRDX3; SNUPN; DKK1; ARIH1; NRG4; PEAK1; RGS10; GRK5; DNAJA4; SIN3A; NEO1; HECW1; COA1; PCLO; TSPAN9; CNTN1; MLXIP; IL31; CLIP1; RILPL2; ANKRD6; GPR142; PRKCA; TANC2; ABLIM3; SPOCK1; MGAT5; HSPD1; HSPE1; CASP8; ALS2CR12; MRPS36; CCNB1; RDX;
Spleen	76	7887	47.205	1.15103	0.0644771	1	0.781094	1	DCAF11; SGMS1; COX5A; SEMA7A; ZWINT; NEIL1; ETFA; PSTPIP1; SENP8; PML; BAG3; LINGO1; PKM; CYP1A2; LMAN1L; PSMA4; FAM219B; A1CF; CSPG4; MPI; SLIT1; MINPP1; ARID3B; CSK; CYP1A1; TSPAN3; PRKG1; UBL7; INPP5F; SCAMP2; CRABP1; MYO9A; PTEN; PRDX3; DKK1; ARIH1; STOML1; RAB11FIP2; SCAPER; EIF3A; PEAK1; RGS10; GRK5; DNAJA4; SIN3A; NEO1; HECW1; COA1; DDX11; TSPAN9; ABCC9; MLXIP; IL31; CLIP1; RILPL2; ANKRD6;…
HUVEC	111	13061	68.9441	1.01511	0.426586	1	1	1	PCK2; DCAF11; SGMS1; COX5A; SEMA7A; ATAD1; SEC23IP; ZWINT; NEIL1; ETFA; PSTPIP1; BBS4; PML; CSTF2T; BAG3; LINGO1; HYKK; PKM; NPTN; CYP1A2; PAPSS2; ODF3L1; LMAN1L; ISL2; FAM219B; A1CF; TMEM202; CSPG4; MPI; SLIT1; CCDC33; MINPP1; CSK; FAM45A; CYP1A1; INPP5F; MCMBP; NR2E3; SCAMP2; SNX33; PARP6; IREB2; STRA6; PTEN; PRDX3; CYP11A1; C15orf39; EDC3; FAM204A; STOML1; RAB11FIP2; SCAMP5; ULK3; CHRNA5; SCAP…
Tonsils	59	7274	36.646	0.968899	0.650258	1	1	1	DCAF11; COX5A; ZWINT; ETFA; PSTPIP1; SENP8; PML; BAG3; LINGO1; PKM; CYP1A2; PSMA4; CHRNA3; CSPG4; MPI; MINPP1; CSK; CYP1A1; PRKG1; SCAMP2; CRABP1; PARP6; PTEN; PRDX3; CYP11A1; SNUPN; DKK1; ARIH1; NRG4; PEAK1; RGS10; GRK5; DNAJA4; SIN3A; NEO1; HECW1; PCLO; TSPAN9; ABCC9; MLXIP; IL31; CLIP1; RILPL2; ANKRD6; GPR142; PRKCA; TANC2; ABLIM3; SPOCK1; MGAT5; HSPD1; HSPE1; CASP8; ALS2CR12; MRPS36; CCNB1; R…
Jurkat A3	48	4200	29.8137	1.36524	0.0108727	1	0.671827	1	COX5A; ATAD1; ETFA; PSTPIP1; BBS4; CSTF2T; BAG3; WDR61; PKM; NPTN; PSMA4; TIAL1; CHRNA3; MINPP1; ARID3B; CSK; MCMBP; MYO9A; RCN2; SNUPN; EDC3; PPCDC; ARIH1; ADPGK; PTPN9; CLK3; PEAK1; GRK5; NEO1; COA1; ST7L; DDX11; RILPL2; PRPSAP1; GPR142; PRKCA; TANC2; PDHX; YTHDC2; PKP4; HSPD1; HSPE1; MRPS36; CENPH; RABL6; RDX; RPS28; FDX1;
Rectum	58	7113	36.0248	0.974038	0.629327	1	1	1	PCK2; DCAF11; COX5A; ZWINT; ETFA; PML; BAG3; PKM; CYP1A2; PSMA4; CHRNA3; CSPG4; MPI; MINPP1; CSK; CYP1A1; TSPAN3; PRKG1; SCAMP2; CRABP1; PARP6; PTEN; PRDX3; CYP11A1; SNUPN; DKK1; ARIH1; NRG4; PEAK1; RGS10; GRK5; DNAJA4; SIN3A; NEO1; HECW1; COA1; PCLO; TSPAN9; ABCC9; MLXIP; CLIP1; RILPL2; ANKRD6; GPR142; PRKCA; TANC2; ABLIM3; SPOCK1; MGAT5; HSPD1; HSPE1; CASP8; MRPS36; CCNB1; PTGES; RDX; TSKU; POU…
Liver	98	11680	60.8696	1.0022	0.520935	1	1	1	PCK2; DCAF11; SGMS1; COX5A; ATAD1; SEC23IP; ZWINT; NEIL1; ETFA; PSTPIP1; BBS4; SENP8; PML; BAG3; WDR61; PKM; NPTN; CYP1A2; PAPSS2; LMAN1L; PSMA4; CHRNA3; A1CF; CSPG4; MPI; MINPP1; ARID3B; CSK; FAM45A; CYP1A1; TSPAN3; PRKG1; UBL7; INPP5F; MCMBP; SCAMP2; CRABP1; PARP6; RCN2; IREB2; PTEN; PRDX3; CYP11A1; SNUPN; DKK1; ARIH1; STOML1; RAB11FIP2; NRG4; CHRNA5; SCAPER; EIF3A; PEAK1; LOXL1; RGS10; GRK5; D…
CNS	1	74	0.621118	1.62989	0.463855	1	1	1	RDX;
CD4	14	1901	8.69565	0.880198	0.732208	1	1	1	COX5A; ETFA; WDR61; PKM; PSMA4; TIAL1; MPI; CSK; PRDX3; EIF3A; RGS10; RAB35; PRKCA; HSPE1;
Skeletal muscles	80	9060	49.6894	1.05473	0.281301	1	1	1	DCAF11; COX5A; SEC23IP; ZWINT; NEIL1; ETFA; BBS4; ISLR; SENP8; PML; BAG3; WDR61; PKM; PSMA4; CHRNA3; A1CF; CSPG4; MPI; MINPP1; ARID3B; CSK; TSPAN3; PRKG1; UBL7; COMMD4; INPP5F; SCAMP2; CRABP1; MYO9A; RCN2; PRDX3; SNUPN; DKK1; PPCDC; ARIH1; STOML1; RAB11FIP2; NRG4; EIF3A; PEAK1; LOXL1; RGS10; GRK5; DNAJA4; NEO1; HECW1; STK17A; COA1; PCLO; DDX11; TSPAN9; GOLT1B; ABCC9; CNTN1; RAB35; MLXIP; IL31; CL…
H293	67	6792	41.6149	1.17833	0.0565076	1	0.737207	1	PCK2; DCAF11; COX5A; SEMA7A; ATAD1; SEC23IP; ZWINT; ETFA; PML; CSTF2T; BAG3; WDR61; PKM; NPTN; PAPSS2; PSMA4; TIAL1; A1CF; CSPG4; MPI; MINPP1; ARID3B; CSK; FAM45A; UBL7; COMMD4; SCAMP2; MYO9A; RCN2; IREB2; PTEN; PRDX3; SNUPN; EDC3; ARIH1; RAB11FIP2; ADPGK; SCAPER; EIF3A; PTPN9; RGS10; SIN3A; DDX11; GOLT1B; CNTN1; RAB35; MLXIP; CLIP1; PRPSAP1; PRKCA; NTN1; PDHX; ABLIM3; YTHDC2; MGAT5; PKP4; HSPE1;…
Prostate	70	7923	43.4783	1.05535	0.304211	1	1	1	DCAF11; COX5A; SEMA7A; ZWINT; NEIL1; ETFA; ISLR; PML; BAG3; PKM; CYP1A2; LMAN1L; PSMA4; A1CF; CSPG4; MPI; MINPP1; ARID3B; CSK; CYP1A1; PRKG1; UBL7; SCAMP2; CRABP1; PARP6; MYO9A; PRDX3; CYP11A1; SNUPN; DKK1; ARIH1; STOML1; NRG4; EIF3A; CLK3; PEAK1; RGS10; GRK5; DNAJA4; SIN3A; NEO1; HECW1; COA1; PCLO; ST7L; DDX11; TSPAN9; ABCC9; MLXIP; IL31; CLIP1; RILPL2; ANKRD6; GPR142; PRKCA; TANC2; NTN1; ABLIM3…
Jurkat	29	2869	18.0124	1.20765	0.159547	1	1	1	COX5A; SEMA7A; PML; BAG3; PKM; NPTN; PSMA4; MINPP1; CSK; TSPAN3; RCN2; PRDX3; ULK3; SCAPER; MAN2C1; EIF3A; CLK3; NEO1; STK17A; PCLO; CLIP1; PRKCA; PDHX; HSPD1; HSPE1; CENPH; CCNB1; RPS28; FDX1;
Bone marrow	75	7808	46.5839	1.14738	0.0712716	1	0.839421	1	PCK2; DCAF11; COX5A; SEMA7A; SEC23IP; ZWINT; ETFA; PSTPIP1; SENP8; PML; BAG3; WDR61; PKM; NPTN; CYP1A2; PAPSS2; PSMA4; TIAL1; CSPG4; MPI; MINPP1; CSK; PRKG1; UBL7; COMMD4; SCAMP2; CRABP1; PARP6; MYO9A; PTEN; PRDX3; SNUPN; DKK1; ARIH1; STOML1; ADPGK; NRG4; EIF3A; PTPN9; PEAK1; RGS10; GRK5; DNAJA4; SIN3A; NEO1; HECW1; COA1; PCLO; TSPAN9; RAB35; MLXIP; IL31; CLIP1; RILPL2; ANKRD6; PRPSAP1; GPR142; P…
Lateral ventricle	51	6620	31.677	0.920287	0.793163	1	1	1	DCAF11; COX5A; ZWINT; ETFA; PML; BAG3; LINGO1; PKM; CYP1A2; PSMA4; CHRNA3; CSPG4; MPI; MINPP1; CSK; TSPAN3; PRKG1; SCAMP2; CRABP1; PARP6; PTEN; PRDX3; CYP11A1; SNUPN; ARIH1; PEAK1; RGS10; GRK5; DNAJA4; SIN3A; NEO1; HECW1; COA1; PCLO; TSPAN9; ABCC9; MLXIP; CLIP1; RILPL2; ANKRD6; PRKCA; TANC2; ABLIM3; SPOCK1; MGAT5; HSPD1; HSPE1; CASP8; MRPS36; RDX; TSKU;
Colorectal cancer	59	7513	36.646	0.938077	0.761427	1	1	1	PCK2; DCAF11; COX5A; ZWINT; ETFA; PML; BAG3; PKM; CYP1A2; PSMA4; CHRNA3; CSPG4; MPI; SLIT1; MINPP1; CSK; CYP1A1; TSPAN3; PRKG1; SCAMP2; CRABP1; PARP6; PTEN; PRDX3; CYP11A1; SNUPN; DKK1; ARIH1; NRG4; PEAK1; RGS10; GRK5; DNAJA4; SIN3A; NEO1; HECW1; COA1; PCLO; TSPAN9; ABCC9; CNTN1; MLXIP; CLIP1; RILPL2; ANKRD6; GPR142; PRKCA; TANC2; ABLIM3; SPOCK1; MGAT5; HSPD1; HSPE1; CASP8; ALS2CR12; MRPS36; CCNB…
Gall bladder	59	7295	36.646	0.96611	0.660808	1	1	1	PCK2; DCAF11; COX5A; ZWINT; ETFA; PML; BAG3; PKM; CYP1A2; PSMA4; CHRNA3; CSPG4; MPI; SLIT1; MINPP1; CSK; CYP1A1; TSPAN3; PRKG1; SCAMP2; CRABP1; PARP6; PTEN; PRDX3; CYP11A1; SNUPN; DKK1; ARIH1; NRG4; PEAK1; RGS10; GRK5; DNAJA4; SIN3A; NEO1; HECW1; COA1; PCLO; TSPAN9; ABCC9; MLXIP; CLIP1; RILPL2; ANKRD6; GPR142; PRKCA; TANC2; ABLIM3; SPOCK1; MGAT5; HSPD1; HSPE1; CASP8; ALS2CR12; MRPS36; CCNB1; RDX;…
Plasma	111	11971	68.9441	1.10754	0.045369	1	0.686061	1	PCK2; DCAF11; SGMS1; COX5A; SEMA7A; SEC23IP; CHRNB4; ETFA; BBS4; RPP25; ISLR; SENP8; PML; BAG3; WDR61; PKM; NPTN; ODF3L1; LMAN1L; UBE2Q2; PSMA4; A1CF; CSPG4; MPI; SLIT1; CCDC33; MINPP1; ARID3B; CSK; FAM45A; CYP1A1; TSPAN3; PRKG1; COMMD4; INPP5F; MCMBP; NR2E3; SCAMP2; SNX33; MYO9A; RCN2; IREB2; STRA6; PTEN; PRDX3; CYP11A1; SNUPN; C15orf39; EDC3; ARIH1; STOML1; ADPGK; CHRNA5; SCAPER; MAN2C1; EIF3A;…
Malignant carcinoid	57	7081	35.4037	0.961574	0.674031	1	1	1	PCK2; DCAF11; COX5A; ZWINT; ETFA; PML; BAG3; PKM; CYP1A2; PSMA4; CHRNA3; CSPG4; MPI; MINPP1; CSK; CYP1A1; TSPAN3; PRKG1; SCAMP2; CRABP1; PARP6; PTEN; PRDX3; SNUPN; DKK1; ARIH1; NRG4; PEAK1; RGS10; GRK5; DNAJA4; SIN3A; NEO1; HECW1; COA1; PCLO; TSPAN9; ABCC9; CNTN1; MLXIP; IL31; CLIP1; RILPL2; ANKRD6; GPR142; PRKCA; TANC2; ABLIM3; SPOCK1; MGAT5; HSPD1; HSPE1; CASP8; MRPS36; CCNB1; RDX; TSKU;
Ascites cancer cell	31	3509	19.2547	1.05546	0.401335	1	1	1	PCK2; COX5A; ATAD1; ETFA; PSTPIP1; PML; CSTF2T; BAG3; WDR61; PKM; NPTN; PAPSS2; PSMA4; TIAL1; CSK; SCAMP2; RCN2; PRDX3; ADPGK; EIF3A; LOXL1; NEO1; CLIP1; PDHX; HSPE1; MRPS36; PACSIN2; RDX; POLR2E; RPS28; FDX1;
Endometrial cancer	61	7460	37.8882	0.976761	0.622638	1	1	1	PCK2; DCAF11; COX5A; ZWINT; ETFA; PML; BAG3; PKM; CYP1A2; PSMA4; CHRNA3; CSPG4; MPI; SLIT1; MINPP1; CSK; CYP1A1; TSPAN3; PRKG1; SCAMP2; CRABP1; PARP6; PTEN; PRDX3; CYP11A1; SNUPN; DKK1; ARIH1; NRG4; PEAK1; RGS10; GRK5; DNAJA4; SIN3A; NEO1; HECW1; COA1; PCLO; TSPAN9; ABCC9; CNTN1; MLXIP; IL31; CLIP1; RILPL2; ANKRD6; GPR142; PRKCA; TANC2; ABLIM3; SPOCK1; MGAT5; HSPD1; HSPE1; CASP8; ALS2CR12; MRPS36…
Lung cancer	60	7435	37.2671	0.963982	0.670612	1	1	1	PCK2; DCAF11; COX5A; ZWINT; ETFA; PSTPIP1; PML; BAG3; PKM; CYP1A2; PSMA4; CSPG4; MPI; SLIT1; MINPP1; CSK; CYP1A1; TSPAN3; PRKG1; SCAMP2; CRABP1; PARP6; PTEN; PRDX3; CYP11A1; SNUPN; DKK1; ARIH1; NRG4; PEAK1; RGS10; DNAJA4; SIN3A; NEO1; HECW1; COA1; PCLO; TSPAN9; ABCC9; CNTN1; MLXIP; IL31; CLIP1; RILPL2; ANKRD6; GPR142; PRKCA; TANC2; ABLIM3; SPOCK1; MGAT5; HSPD1; HSPE1; CASP8; ALS2CR12; MRPS36; CCN…
HCT116	20	2651	12.4224	0.901493	0.726233	1	1	1	PCK2; COX5A; SEC23IP; ETFA; PKM; PSMA4; TIAL1; CSPG4; MCMBP; PRDX3; EIF3A; RGS10; GOLT1B; RAB35; PRPSAP1; HSPD1; HSPE1; RDX; POLR2E; RPS28;
PC3	14	1294	8.69565	1.29309	0.195818	1	1	1	SEMA7A; PKM; TIAL1; CSPG4; MINPP1; PRDX3; DKK1; LOXL1; RAB35; SPOCK1; MGAT5; HSPE1; CCNB1; TSKU;
MicroProt	3	440	1.86335	0.817016	0.716339	1	1	1	PKM; MINPP1; LOXL1;
Epididymis	56	7090	34.7826	0.943508	0.735239	1	1	1	DCAF11; COX5A; ZWINT; ETFA; PML; BAG3; PKM; CYP1A2; PSMA4; CHRNA3; CSPG4; MPI; SLIT1; CSK; CYP1A1; TSPAN3; PRKG1; SCAMP2; CRABP1; PARP6; PTEN; PRDX3; CYP11A1; SNUPN; DKK1; ARIH1; NRG4; PEAK1; RGS10; GRK5; DNAJA4; SIN3A; NEO1; HECW1; COA1; PCLO; TSPAN9; ABCC9; CNTN1; MLXIP; CLIP1; RILPL2; ANKRD6; GPR142; PRKCA; TANC2; ABLIM3; SPOCK1; MGAT5; HSPD1; HSPE1; CASP8; ALS2CR12; MRPS36; RDX; TSKU;
Cerebellum	69	7633	42.8571	1.0798	0.228009	1	1	1	DCAF11; SGMS1; COX5A; ZWINT; CHRNB4; ETFA; PRLHR; PML; BAG3; LINGO1; PKM; CYP1A2; LMAN1L; PSMA4; CHRNA3; CSPG4; MPI; CSK; CYP1A1; TSPAN3; PRKG1; INPP5F; SCAMP2; CRABP1; PARP6; MYO9A; PTEN; PRDX3; SNUPN; DKK1; ARIH1; STOML1; RAB11FIP2; NRG4; SCAPER; EIF3A; PEAK1; RGS10; GRK5; DNAJA4; SIN3A; NEO1; HECW1; COA1; PCLO; TSPAN9; ABCC9; CNTN1; MLXIP; CLIP1; RILPL2; ANKRD6; PRKCA; TANC2; ABLIM3; SPOCK1; K…
Nasopharynx	56	6904	34.7826	0.968926	0.645482	1	1	1	PCK2; DCAF11; COX5A; ZWINT; ETFA; PML; BAG3; PKM; CYP1A2; PSMA4; CHRNA3; CSPG4; MPI; MINPP1; CSK; CYP1A1; TSPAN3; PRKG1; SCAMP2; CRABP1; PARP6; PTEN; PRDX3; CYP11A1; SNUPN; DKK1; ARIH1; NRG4; PEAK1; RGS10; GRK5; DNAJA4; SIN3A; NEO1; HECW1; COA1; PCLO; TSPAN9; ABCC9; MLXIP; CLIP1; RILPL2; ANKRD6; GPR142; PRKCA; TANC2; ABLIM3; SPOCK1; MGAT5; HSPE1; CASP8; ALS2CR12; MRPS36; CCNB1; RDX; TSKU;
global_SCX_fractionated	26	2476	16.1491	1.25463	0.131054	1	1	1	DCAF11; COX5A; ATAD1; SEC23IP; ETFA; BAG3; WDR61; PKM; NPTN; PAPSS2; PSMA4; TIAL1; MPI; RCN2; PRDX3; EDC3; ARIH1; EIF3A; RGS10; PDHX; YTHDC2; HSPE1; MRPS36; PTGES; PACSIN2; RDX;
Hippocampus	69	7355	42.8571	1.12061	0.130146	1	1	1	DCAF11; SGMS1; COX5A; ZWINT; CHRNB4; ETFA; PRLHR; PML; BAG3; LINGO1; PKM; CYP1A2; PSMA4; CHRNA3; CSPG4; MPI; SLIT1; MINPP1; CSK; CYP1A1; TSPAN3; PRKG1; INPP5F; SCAMP2; CRABP1; PARP6; PTEN; PRDX3; CYP11A1; SNUPN; DKK1; ARIH1; STOML1; RAB11FIP2; CHRNA5; SCAPER; EIF3A; PEAK1; RGS10; GRK5; DNAJA4; SIN3A; NEO1; HECW1; COA1; PCLO; TSPAN9; ABCC9; MLXIP; CLIP1; RILPL2; ANKRD6; GPR142; PRKCA; TANC2; ABLIM…
HeLa	59	5789	36.646	1.21744	0.043504	1	0.686061	1	PCK2; DCAF11; COX5A; ATAD1; ETFA; PSTPIP1; RPP25; PML; CSTF2T; BAG3; WDR61; PKM; ODF3L1; PSMA4; TIAL1; TMEM202; CSPG4; MPI; CSK; COMMD4; MCMBP; PARP6; MYO9A; RCN2; STRA6; PRDX3; DKK1; EDC3; ARIH1; ULK3; MAN2C1; EIF3A; LOXL1; DNAJA4; SIN3A; HECW1; VWC2; PCLO; ST7L; CNTN1; RAB35; CLIP1; GPR142; PRKCA; TANC2; PDHX; YTHDC2; HSPD1; HSPE1; CASP8; CENPH; CCNB1; PTGES; RABL6; PACSIN2; RDX; POLR2E; RPS28;…
Malignant lymphoma	54	6586	33.5404	0.979441	0.604652	1	1	1	DCAF11; COX5A; ZWINT; ETFA; PSTPIP1; PML; BAG3; LINGO1; PKM; CYP1A2; PSMA4; CSPG4; MPI; SLIT1; MINPP1; CSK; CYP1A1; PRKG1; SCAMP2; CRABP1; PARP6; PTEN; PRDX3; SNUPN; DKK1; ARIH1; NRG4; PEAK1; RGS10; DNAJA4; SIN3A; NEO1; HECW1; COA1; PCLO; TSPAN9; ABCC9; MLXIP; CLIP1; RILPL2; ANKRD6; GPR142; PRKCA; TANC2; ABLIM3; SPOCK1; MGAT5; HSPD1; HSPE1; CASP8; MRPS36; CCNB1; TSKU; POU2AF1;
Prostate cancer	59	7214	36.646	0.976957	0.619451	1	1	1	DCAF11; COX5A; ZWINT; ETFA; PML; BAG3; PKM; CYP1A2; PSMA4; CHRNA3; CSPG4; MPI; SLIT1; MINPP1; CSK; CYP1A1; TSPAN3; PRKG1; SCAMP2; CRABP1; PARP6; PTEN; PRDX3; CYP11A1; SNUPN; DKK1; ARIH1; NRG4; PEAK1; RGS10; GRK5; DNAJA4; SIN3A; NEO1; HECW1; COA1; PCLO; TSPAN9; ABCC9; CNTN1; MLXIP; IL31; CLIP1; RILPL2; ANKRD6; GPR142; PRKCA; TANC2; ABLIM3; SPOCK1; MGAT5; HSPD1; HSPE1; CASP8; ALS2CR12; MRPS36; CCNB…
Skin	53	7292	32.9193	0.868235	0.919525	1	1	1	PCK2; DCAF11; COX5A; ZWINT; ETFA; PML; BAG3; WDR61; PKM; CYP1A2; PSMA4; CSPG4; MPI; SLIT1; MINPP1; CSK; PRKG1; SCAMP2; CRABP1; PARP6; PRDX3; CYP11A1; SNUPN; DKK1; ARIH1; EIF3A; PEAK1; RGS10; GRK5; DNAJA4; SIN3A; NEO1; HECW1; PCLO; TSPAN9; ABCC9; CNTN1; MLXIP; IL31; CLIP1; RILPL2; ANKRD6; PRKCA; ABLIM3; MGAT5; HSPD1; HSPE1; CASP8; ALS2CR12; MRPS36; CCNB1; ACER3; TSKU;
Placenta	102	10894	63.354	1.11836	0.0493511	1	0.686061	1	PCK2; DCAF11; COX5A; SEMA7A; ATAD1; SEC23IP; ZWINT; NEIL1; ETFA; PSTPIP1; BBS4; ISLR; SENP8; PML; CSTF2T; BAG3; WDR61; PKM; NPTN; CYP1A2; PAPSS2; PSMA4; TIAL1; CHRNA3; CSPG4; MPI; MINPP1; ARID3B; CSK; CYP1A1; TSPAN3; PRKG1; UBL7; COMMD4; INPP5F; SCAMP2; CRABP1; PARP6; MYO9A; RCN2; IREB2; STRA6; PTEN; PRDX3; CYP11A1; SNUPN; DKK1; EDC3; ARIH1; STOML1; ADPGK; NRG4; EIF3A; PTPN9; PEAK1; LOXL1; RGS10;…
Lung	91	9992	56.5217	1.08783	0.139103	1	1	1	PCK2; DCAF11; SGMS1; COX5A; SEMA7A; SEC23IP; ZWINT; NEIL1; ETFA; PSTPIP1; BBS4; SENP8; PML; BAG3; PKM; CYP1A2; PSMA4; CHRNA3; A1CF; CSPG4; MPI; SLIT1; MINPP1; ARID3B; CSK; CYP1A1; TSPAN3; PRKG1; UBL7; INPP5F; SCAMP2; CRABP1; PARP6; MYO9A; RCN2; PRDX3; CYP11A1; SNUPN; DKK1; ARIH1; STOML1; RAB11FIP2; NRG4; SCAPER; EIF3A; PEAK1; LOXL1; RGS10; GRK5; DNAJA4; SIN3A; NEO1; HECW1; STK17A; COA1; PCLO; ST7…
Cerebral cortex	59	7099	36.646	0.992783	0.558198	1	1	1	DCAF11; COX5A; ZWINT; ETFA; PML; BAG3; LINGO1; PKM; CYP1A2; PSMA4; CHRNA3; CSPG4; MPI; SLIT1; MINPP1; CSK; CYP1A1; TSPAN3; PRKG1; SCAMP2; CRABP1; PARP6; MYO9A; PTEN; PRDX3; CYP11A1; SNUPN; DKK1; ARIH1; STOML1; EIF3A; PEAK1; RGS10; GRK5; DNAJA4; SIN3A; NEO1; HECW1; COA1; PCLO; TSPAN9; ABCC9; MLXIP; CLIP1; RILPL2; ANKRD6; PRKCA; TANC2; ABLIM3; SPOCK1; MGAT5; HSPD1; HSPE1; CASP8; MRPS36; PTGES; RDX;…
Ovarian cancer	63	7644	39.1304	0.984498	0.593681	1	1	1	PCK2; DCAF11; COX5A; ZWINT; ETFA; PSTPIP1; PML; BAG3; PKM; CYP1A2; PSMA4; CHRNA3; CSPG4; MPI; SLIT1; MINPP1; CSK; CYP1A1; TSPAN3; PRKG1; SCAMP2; CRABP1; PARP6; PTEN; PRDX3; CYP11A1; SNUPN; DKK1; ARIH1; NRG4; PEAK1; RGS10; GRK5; DNAJA4; SIN3A; NEO1; HECW1; COA1; PCLO; TSPAN9; ABCC9; CNTN1; MLXIP; IL31; CLIP1; RILPL2; ANKRD6; GPR142; PRKCA; TANC2; ABLIM3; SPOCK1; MGAT5; HSPD1; HSPE1; CASP8; ALS2CR1…
Kidney	91	10256	56.5217	1.05983	0.231459	1	1	1	PCK2; DCAF11; SGMS1; COX5A; SEMA7A; SEC23IP; ZWINT; NEIL1; ETFA; BBS4; ISLR; SENP8; PML; BAG3; PKM; CYP1A2; PSMA4; CHRNA3; A1CF; CSPG4; MPI; SLIT1; MINPP1; ARID3B; CSK; CYP1A1; TSPAN3; PRKG1; UBL7; INPP5F; SCAMP2; CRABP1; PARP6; MYO9A; RCN2; PTEN; PRDX3; CYP11A1; SNUPN; DKK1; ARIH1; STOML1; RAB11FIP2; NRG4; SCAPER; EIF3A; PEAK1; LOXL1; RGS10; GRK5; DNAJA4; SIN3A; NEO1; HECW1; STK17A; COA1; PCLO; …
H1688	9	1007	5.59006	1.06861	0.469195	1	1	1	PCK2; COX5A; PKM; PSMA4; TIAL1; PRDX3; HSPD1; HSPE1; LCN15;
Sy5y	24	2490	14.9068	1.15164	0.260198	1	1	1	COX5A; RPP25; CSTF2T; WDR61; PKM; NPTN; PSMA4; MINPP1; CSK; FAM45A; PRDX3; EDC3; RAB11FIP2; EIF3A; NEO1; COA1; CNTN1; PRPSAP1; PRKCA; MGAT5; HSPE1; MRPS36; RDX; POLR2E;
Duodenum	59	7275	36.646	0.968766	0.650763	1	1	1	PCK2; DCAF11; COX5A; ZWINT; ETFA; PML; BAG3; PKM; CYP1A2; PSMA4; CHRNA3; CSPG4; MPI; SLIT1; MINPP1; CSK; CYP1A1; TSPAN3; PRKG1; SCAMP2; CRABP1; PARP6; PTEN; PRDX3; CYP11A1; SNUPN; DKK1; ARIH1; NRG4; PEAK1; RGS10; GRK5; DNAJA4; SIN3A; NEO1; HECW1; COA1; PCLO; TSPAN9; MLXIP; CLIP1; RILPL2; ANKRD6; GPR142; PRKCA; TANC2; ABLIM3; SPOCK1; MGAT5; HSPD1; HSPE1; CASP8; ALS2CR12; MRPS36; CCNB1; PTGES; RDX;…
Bronchus	55	6923	34.1615	0.949016	0.714109	1	1	1	PCK2; DCAF11; COX5A; ZWINT; ETFA; PML; BAG3; LINGO1; PKM; CYP1A2; PSMA4; CHRNA3; CSPG4; MPI; MINPP1; CSK; CYP1A1; TSPAN3; PRKG1; SCAMP2; CRABP1; PARP6; PTEN; PRDX3; SNUPN; DKK1; ARIH1; PEAK1; RGS10; GRK5; DNAJA4; SIN3A; NEO1; HECW1; COA1; PCLO; TSPAN9; ABCC9; MLXIP; CLIP1; RILPL2; ANKRD6; GPR142; PRKCA; TANC2; ABLIM3; SPOCK1; MGAT5; HSPD1; HSPE1; CASP8; ALS2CR12; MRPS36; CCNB1; RDX;
Brain	80	7290	49.6894	1.31082	0.00147066	1	0.671827	1	PCK2; SGMS1; COX5A; SEMA7A; SEC23IP; CHRNB4; NEIL1; ETFA; BBS4; PRLHR; SENP8; BAG3; WDR61; LINGO1; PKM; NPTN; PAPSS2; PSMA4; A1CF; MPI; SLIT1; MINPP1; ARID3B; CYP1A1; TSPAN3; UBL7; INPP5F; CRABP1; MYO9A; RCN2; IREB2; PTEN; PRDX3; CYP11A1; ARIH1; STOML1; RAB11FIP2; SCAMP5; NRG4; CHRNA5; MAN2C1; EIF3A; PEAK1; LOXL1; RGS10; GRK5; DNAJA4; SIN3A; NEO1; HECW1; STK17A; PCLO; ABCC9; CNTN1; RAB35; IL31; C…
Stomach	67	8044	41.6149	0.994933	0.552351	1	1	1	PCK2; DCAF11; SGMS1; COX5A; ZWINT; ETFA; ISLR; PML; BAG3; LINGO1; PKM; CYP1A2; PSMA4; CHRNA3; CSPG4; MPI; SLIT1; MINPP1; CSK; CYP1A1; TSPAN3; PRKG1; UBL7; SCAMP2; CRABP1; PARP6; PTEN; PRDX3; CYP11A1; SNUPN; DKK1; ARIH1; STOML1; NRG4; EIF3A; PEAK1; RGS10; GRK5; DNAJA4; SIN3A; NEO1; HECW1; COA1; PCLO; TSPAN9; ABCC9; CNTN1; MLXIP; CLIP1; RILPL2; ANKRD6; GPR142; PRKCA; TANC2; ABLIM3; SPOCK1; MGAT5; H…
Pancreas	87	9936	54.0373	1.04588	0.300214	1	1	1	PCK2; DCAF11; COX5A; SEC23IP; ZWINT; NEIL1; ETFA; BBS4; SENP8; PML; BAG3; WDR61; PKM; CYP1A2; PAPSS2; PSMA4; CHRNA3; A1CF; CSPG4; MPI; SLIT1; MINPP1; ARID3B; CSK; CYP1A1; TSPAN3; PRKG1; UBL7; INPP5F; SCAMP2; CRABP1; PARP6; MYO9A; RCN2; PTEN; PRDX3; CYP11A1; SNUPN; DKK1; ARIH1; STOML1; RAB11FIP2; NRG4; EIF3A; PEAK1; LOXL1; RGS10; GRK5; DNAJA4; SIN3A; NEO1; HECW1; STK17A; COA1; PCLO; ST7L; DDX11; T…
Lymph nodes	63	6700	39.1304	1.12321	0.143876	1	1	1	DCAF11; SGMS1; COX5A; ZWINT; ETFA; PSTPIP1; SENP8; PML; BAG3; LINGO1; PKM; CYP1A2; PSMA4; CSPG4; MPI; MINPP1; CSK; CYP1A1; PRKG1; UBL7; SCAMP2; CRABP1; PARP6; PTEN; PRDX3; SNUPN; DKK1; ARIH1; STOML1; NRG4; EIF3A; PEAK1; RGS10; GRK5; DNAJA4; SIN3A; NEO1; HECW1; COA1; PCLO; ST7L; TSPAN9; MLXIP; IL31; CLIP1; RILPL2; ANKRD6; GPR142; PRKCA; TANC2; ABLIM3; SPOCK1; MGAT5; HSPD1; HSPE1; CASP8; ALS2CR12; …
H358	19	1489	11.8012	1.52479	0.0431583	1	0.686061	1	SEMA7A; BAG3; WDR61; PKM; PSMA4; RCN2; DKK1; EDC3; RAB11FIP2; EIF3A; CLIP1; NTN1; HSPD1; HSPE1; PACSIN2; RDX; TSKU; RPS28; B3GNT6;
Fallopian tubes	54	6677	33.5404	0.966093	0.652508	1	1	1	DCAF11; COX5A; ZWINT; ETFA; PML; BAG3; LINGO1; PKM; CYP1A2; PSMA4; CHRNA3; CSPG4; MPI; CSK; CYP1A1; TSPAN3; PRKG1; SCAMP2; CRABP1; PARP6; PTEN; PRDX3; CYP11A1; SNUPN; DKK1; ARIH1; NRG4; PEAK1; RGS10; DNAJA4; SIN3A; NEO1; HECW1; COA1; PCLO; ABCC9; MLXIP; IL31; CLIP1; RILPL2; ANKRD6; GPR142; PRKCA; TANC2; ABLIM3; SPOCK1; MGAT5; HSPD1; HSPE1; CASP8; MRPS36; CCNB1; RDX; TSKU;
Head & neck cancer	58	7062	36.0248	0.981073	0.602593	1	1	1	PCK2; DCAF11; COX5A; ZWINT; ETFA; PML; BAG3; PKM; CYP1A2; PSMA4; CSPG4; MPI; MINPP1; CSK; CYP1A1; TSPAN3; PRKG1; SCAMP2; CRABP1; PARP6; PTEN; PRDX3; CYP11A1; SNUPN; DKK1; ARIH1; NRG4; PEAK1; RGS10; GRK5; DNAJA4; SIN3A; NEO1; HECW1; COA1; PCLO; TSPAN9; ABCC9; CNTN1; MLXIP; CLIP1; RILPL2; ANKRD6; GPR142; PRKCA; TANC2; ABLIM3; SPOCK1; MGAT5; HSPD1; HSPE1; CASP8; ALS2CR12; MRPS36; CCNB1; RDX; TSKU; P…
Pancreatic cancer	66	8316	40.9938	0.948028	0.744301	1	1	1	PCK2; DCAF11; COX5A; ZWINT; ETFA; ISLR; PML; BAG3; WDR61; PKM; CYP1A2; PSMA4; CHRNA3; CSPG4; MPI; SLIT1; MINPP1; CSK; CYP1A1; TSPAN3; PRKG1; SCAMP2; CRABP1; PARP6; PTEN; PRDX3; CYP11A1; SNUPN; DKK1; ARIH1; ADPGK; NRG4; EIF3A; PEAK1; RGS10; GRK5; DNAJA4; SIN3A; NEO1; HECW1; COA1; PCLO; TSPAN9; ABCC9; MLXIP; IL31; CLIP1; RILPL2; ANKRD6; GPR142; PRKCA; TANC2; ABLIM3; SPOCK1; MGAT5; HSPD1; HSPE1; CAS…
BT474	5	558	3.10559	1.07232	0.502505	1	1	1	PKM; DKK1; EIF3A; SPOCK1; HSPE1;
Seminal vesicle	57	6620	35.4037	1.02853	0.425734	1	1	1	PCK2; DCAF11; COX5A; ZWINT; ETFA; PML; BAG3; LINGO1; PKM; CYP1A2; PSMA4; CSPG4; MPI; SLIT1; MINPP1; CSK; CYP1A1; TSPAN3; PRKG1; SCAMP2; CRABP1; PARP6; PTEN; PRDX3; CYP11A1; SNUPN; DKK1; ARIH1; NRG4; PEAK1; RGS10; GRK5; DNAJA4; SIN3A; NEO1; HECW1; COA1; PCLO; TSPAN9; MLXIP; CLIP1; RILPL2; ANKRD6; GPR142; PRKCA; TANC2; ABLIM3; SPOCK1; MGAT5; HSPE1; CASP8; ALS2CR12; MRPS36; CCNB1; RDX; TSKU; POU2AF1;
Urinary bladder	61	7054	37.8882	1.03298	0.403851	1	1	1	PCK2; DCAF11; COX5A; ZWINT; ETFA; PML; BAG3; PKM; CYP1A2; PSMA4; CHRNA3; CSPG4; MPI; MINPP1; CSK; CYP1A1; TSPAN3; PRKG1; SCAMP2; CRABP1; PARP6; PTEN; PRDX3; CYP11A1; SNUPN; DKK1; ARIH1; STOML1; NRG4; PEAK1; RGS10; GRK5; DNAJA4; SIN3A; NEO1; HECW1; COA1; PCLO; TSPAN9; ABCC9; CNTN1; MLXIP; IL31; CLIP1; RILPL2; ANKRD6; GPR142; PRKCA; TANC2; ABLIM3; SPOCK1; MGAT5; HSPD1; HSPE1; CASP8; ALS2CR12; MRPS3…
K-562	26	2513	16.1491	1.23615	0.14777	1	1	1	COX5A; ETFA; BAG3; WDR61; PKM; PSMA4; TIAL1; CSK; MCMBP; PRDX3; EDC3; ULK3; EIF3A; RGS10; SIN3A; PRKCA; PDHX; HSPD1; HSPE1; CASP8; CENPH; CCNB1; RABL6; PACSIN2; RDX; POLR2E;
Salivary glands	57	6607	35.4037	1.03056	0.418614	1	1	1	DCAF11; COX5A; ZWINT; ETFA; PML; BAG3; PKM; CYP1A2; LMAN1L; PSMA4; CHRNA3; CSPG4; MPI; MINPP1; CYP1A1; TSPAN3; PRKG1; SCAMP2; CRABP1; PARP6; PRDX3; CYP11A1; SNUPN; DKK1; ARIH1; STOML1; NRG4; EIF3A; PEAK1; RGS10; GRK5; DNAJA4; SIN3A; NEO1; HECW1; PCLO; TSPAN9; ABCC9; MLXIP; IL31; CLIP1; RILPL2; ANKRD6; GPR142; PRKCA; TANC2; ABLIM3; SPOCK1; MGAT5; HSPD1; HSPE1; CASP8; ALS2CR12; MRPS36; CCNB1; PTGES…
Testis	88	10269	54.6584	1.0236	0.405135	1	1	1	DCAF11; COX5A; SEMA7A; ATAD1; SEC23IP; ZWINT; NEIL1; ETFA; ISLR; PML; CSTF2T; BAG3; WDR61; PKM; CYP1A2; LMAN1L; PSMA4; CHRNA3; A1CF; CSPG4; MPI; SLIT1; MINPP1; ARID3B; CSK; CYP1A1; TSPAN3; PRKG1; INPP5F; SCAMP2; CRABP1; PARP6; MYO9A; RCN2; PTEN; PRDX3; CYP11A1; SNUPN; DKK1; ARIH1; STOML1; RAB11FIP2; NRG4; SCAPER; EIF3A; CLK3; PEAK1; RGS10; GRK5; DNAJA4; NEO1; HECW1; COA1; ZPBP; PCLO; ST7L; DDX11;…
MDA231	3	336	1.86335	1.06989	0.536169	1	1	1	PKM; PSMA4; PRDX3;
Urothelial cancer	59	7521	36.646	0.937079	0.76477	1	1	1	DCAF11; COX5A; ZWINT; ETFA; PML; BAG3; PKM; CYP1A2; PSMA4; CHRNA3; CSPG4; MPI; SLIT1; MINPP1; CSK; CYP1A1; TSPAN3; PRKG1; SCAMP2; CRABP1; PARP6; PTEN; PRDX3; CYP11A1; SNUPN; DKK1; ARIH1; NRG4; PEAK1; RGS10; GRK5; DNAJA4; SIN3A; NEO1; HECW1; COA1; PCLO; TSPAN9; ABCC9; MLXIP; IL31; CLIP1; RILPL2; ANKRD6; GPR142; PRKCA; TANC2; ABLIM3; SPOCK1; MGAT5; HSPD1; HSPE1; CASP8; ALS2CR12; MRPS36; CCNB1; RDX;…
R	20	1948	12.4224	1.22682	0.198243	1	1	1	PCK2; ETFA; WDR61; PKM; PSMA4; MPI; CSK; UBL7; IREB2; PRDX3; EDC3; EIF3A; SIN3A; RAB35; HSPE1; CASP8; MRPS36; CCNB1; PACSIN2; RDX;
Soft tissue	55	6969	34.1615	0.942751	0.735221	1	1	1	DCAF11; COX5A; ZWINT; ETFA; PML; BAG3; PKM; CYP1A2; PSMA4; CHRNA3; CSPG4; MPI; MINPP1; CSK; TSPAN3; PRKG1; SCAMP2; CRABP1; PARP6; PRDX3; CYP11A1; DKK1; ARIH1; NRG4; PEAK1; RGS10; GRK5; DNAJA4; SIN3A; NEO1; HECW1; PCLO; TSPAN9; ABCC9; CNTN1; MLXIP; IL31; CLIP1; RILPL2; ANKRD6; GPR142; PRKCA; TANC2; ABLIM3; SPOCK1; MGAT5; HSPD1; HSPE1; CASP8; ALS2CR12; MRPS36; RDX; TSKU; POU2AF1; B3GNT6;
Testis cancer	58	7248	36.0248	0.955896	0.696632	1	1	1	DCAF11; COX5A; ZWINT; ETFA; PML; BAG3; PKM; CYP1A2; PSMA4; CHRNA3; CSPG4; MPI; SLIT1; MINPP1; CSK; CYP1A1; TSPAN3; PRKG1; SCAMP2; CRABP1; PARP6; PTEN; PRDX3; CYP11A1; SNUPN; DKK1; ARIH1; NRG4; PEAK1; RGS10; GRK5; DNAJA4; SIN3A; NEO1; HECW1; COA1; PCLO; TSPAN9; ABCC9; MLXIP; CLIP1; RILPL2; ANKRD6; GPR142; PRKCA; TANC2; ABLIM3; SPOCK1; MGAT5; HSPD1; HSPE1; CASP8; ALS2CR12; MRPS36; CCNB1; RDX; TSKU;…
Neutrophil	21	2031	13.0435	1.23549	0.182073	1	1	1	RPP25; ISLR; PML; CSTF2T; BAG3; WDR61; PKM; NPTN; PSMA4; TIAL1; MINPP1; CSK; SCAMP2; CRABP1; PRDX3; NEO1; PCLO; CNTN1; HSPE1; PTGES; POLR2E;
CD8	33	3327	20.4969	1.185	0.165073	1	1	1	PCK2; COX5A; ATAD1; SEC23IP; ETFA; PML; BAG3; WDR61; PKM; NPTN; PSMA4; MINPP1; CSK; CRABP1; RCN2; PRDX3; EDC3; EIF3A; RGS10; SIN3A; CNTN1; RAB35; PRKCA; PDHX; HSPE1; CASP8; MRPS36; CENPH; CCNB1; RABL6; PACSIN2; RDX; POLR2E;
Stomach cancer	58	7399	36.0248	0.936388	0.764311	1	1	1	PCK2; DCAF11; COX5A; ZWINT; ETFA; PML; BAG3; PKM; CYP1A2; PSMA4; CHRNA3; CSPG4; MPI; SLIT1; MINPP1; CSK; CYP1A1; TSPAN3; PRKG1; SCAMP2; CRABP1; PARP6; PTEN; PRDX3; CYP11A1; SNUPN; DKK1; ARIH1; NRG4; PEAK1; RGS10; GRK5; DNAJA4; SIN3A; NEO1; HECW1; COA1; PCLO; TSPAN9; ABCC9; MLXIP; CLIP1; RILPL2; ANKRD6; GPR142; PRKCA; TANC2; ABLIM3; SPOCK1; MGAT5; HSPD1; HSPE1; CASP8; ALS2CR12; MRPS36; CCNB1; TSKU…
Skin cancer	58	7029	36.0248	0.985679	0.584996	1	1	1	DCAF11; COX5A; ZWINT; ETFA; PSTPIP1; PML; BAG3; PKM; CYP1A2; PSMA4; CHRNA3; CSPG4; MPI; MINPP1; CSK; CYP1A1; PRKG1; SCAMP2; CRABP1; PARP6; PTEN; PRDX3; SNUPN; DKK1; ARIH1; NRG4; PEAK1; RGS10; GRK5; DNAJA4; SIN3A; NEO1; HECW1; COA1; PCLO; TSPAN9; ABCC9; CNTN1; MLXIP; IL31; CLIP1; RILPL2; ANKRD6; GPR142; PRKCA; TANC2; ABLIM3; SPOCK1; MGAT5; HSPD1; HSPE1; CASP8; ALS2CR12; MRPS36; CCNB1; RDX; TSKU; P…
Adrenal glands	66	7554	40.9938	1.04366	0.355591	1	1	1	DCAF11; COX5A; ZWINT; ETFA; PRLHR; PML; BAG3; LINGO1; PKM; CYP1A2; LMAN1L; PSMA4; CHRNA3; CSPG4; MPI; MINPP1; CSK; CYP1A1; TSPAN3; PRKG1; UBL7; SCAMP2; CRABP1; PARP6; PTEN; PRDX3; CYP11A1; SNUPN; DKK1; ARIH1; STOML1; NRG4; EIF3A; PEAK1; RGS10; GRK5; DNAJA4; NEO1; HECW1; COA1; PCLO; TSPAN9; ABCC9; MLXIP; IL31; CLIP1; RILPL2; ANKRD6; PRPSAP1; GPR142; PRKCA; TANC2; ABLIM3; SPOCK1; MGAT5; HSPD1; HSPE…
TOV112D	18	1276	11.1801	1.68572	0.0207107	1	0.671827	1	PCK2; COX5A; SEMA7A; ETFA; WDR61; PKM; TIAL1; MINPP1; PRDX3; DKK1; EIF3A; LOXL1; SIN3A; NEO1; CLIP1; HSPE1; PACSIN2; TSKU;
LNCaP	19	1455	11.8012	1.56042	0.0354473	1	0.671827	1	ETFA; CSTF2T; BAG3; WDR61; PKM; PSMA4; TIAL1; MPI; MINPP1; PRDX3; DKK1; EIF3A; NEO1; CLIP1; SPOCK1; HSPD1; HSPE1; PACSIN2; RDX;
Corpus, uterine	56	6997	34.7826	0.956048	0.691879	1	1	1	DCAF11; COX5A; ZWINT; ETFA; PML; BAG3; PKM; CYP1A2; PSMA4; CHRNA3; CSPG4; MPI; SLIT1; MINPP1; CSK; CYP1A1; PRKG1; SCAMP2; CRABP1; PARP6; PTEN; PRDX3; CYP11A1; SNUPN; DKK1; ARIH1; NRG4; PEAK1; RGS10; GRK5; DNAJA4; SIN3A; NEO1; HECW1; COA1; PCLO; TSPAN9; ABCC9; MLXIP; CLIP1; RILPL2; ANKRD6; GPR142; PRKCA; TANC2; ABLIM3; SPOCK1; MGAT5; HSPD1; HSPE1; CASP8; MRPS36; CCNB1; RDX; TSKU; POU2AF1;
Appendix	60	7004	37.2671	1.0233	0.440941	1	1	1	PCK2; DCAF11; COX5A; ZWINT; ETFA; PSTPIP1; PML; BAG3; LINGO1; PKM; CYP1A2; PSMA4; CHRNA3; CSPG4; MPI; MINPP1; CSK; CYP1A1; TSPAN3; PRKG1; SCAMP2; CRABP1; PARP6; PTEN; PRDX3; CYP11A1; SNUPN; DKK1; ARIH1; PEAK1; RGS10; GRK5; DNAJA4; SIN3A; NEO1; HECW1; COA1; PCLO; TSPAN9; ABCC9; CNTN1; MLXIP; IL31; CLIP1; RILPL2; ANKRD6; GPR142; PRKCA; TANC2; ABLIM3; SPOCK1; MGAT5; HSPD1; HSPE1; CASP8; MRPS36; CCNB…
Erythrocytes	20	1539	12.4224	1.55286	0.0326889	1	0.671827	1	DCAF11; SEC23IP; SENP8; PML; WDR61; PKM; PSMA4; UBL7; SCAMP2; PPCDC; ARIH1; ULK3; PTPN9; RGS10; DNAJA4; RAB35; CASP8; RABL6; PACSIN2; RDX;
HTB75	13	1277	8.07453	1.21677	0.272554	1	1	1	COX5A; ETFA; PKM; TIAL1; MINPP1; RCN2; PRDX3; DKK1; EIF3A; SPOCK1; HSPD1; HSPE1; TSKU;
Smooth muscle cells	33	5124	20.4969	0.769418	0.971367	1	1	1	COX5A; ZWINT; ETFA; PML; BAG3; CYP1A2; CSPG4; PRKG1; CRABP1; PRDX3; DKK1; ARIH1; NRG4; PEAK1; GRK5; DNAJA4; NEO1; HECW1; COA1; TSPAN9; MLXIP; CLIP1; ANKRD6; PRKCA; TANC2; ABLIM3; SPOCK1; HSPD1; HSPE1; CASP8; ALS2CR12; MRPS36; POU2AF1;
Thymocyte	2	48	1.24224	5.00024	0.0611707	1	0.762835	1	SEMA7A; TIAL1;
Urine	31	3267	19.2547	1.13365	0.249506	1	1	1	PCK2; SEMA7A; ETFA; PSTPIP1; ISLR; WDR61; LINGO1; PKM; NPTN; PSMA4; CSPG4; SLIT1; MINPP1; CSK; TSPAN3; CRABP1; IREB2; PRDX3; ULK3; NEO1; TBC1D21; ABCC9; CNTN1; RAB35; PRKCA; YTHDC2; MGAT5; HSPD1; HSPE1; PACSIN2; RDX;
Heart	49	5507	30.4348	1.06291	0.333972	1	1	1	PCK2; SGMS1; SEMA7A; SEC23IP; NEIL1; BBS4; ISLR; SENP8; BAG3; A1CF; MPI; MINPP1; ARID3B; TSPAN3; PRKG1; UBL7; INPP5F; SCAMP2; MYO9A; RCN2; CYP11A1; ARIH1; STOML1; RAB11FIP2; EIF3A; PEAK1; LOXL1; GRK5; NEO1; STK17A; DDX11; ABCC9; RAB35; MLXIP; IL31; TANC2; NTN1; PDHX; ABLIM3; SPOCK1; KLHL29; HSPD1; CASP8; INVS; PTGES; ZC3H12C; ACER3; ST3GAL4; KIRREL3;
Amygdala	16	1204	9.93789	1.58814	0.0452337	1	0.686061	1	LINGO1; CHRNA3; SLIT1; INPP5F; STOML1; RAB11FIP2; SCAPER; EIF3A; PEAK1; TANC2; ABLIM3; SPOCK1; KLHL29; PTGES; ZC3H12C; ARHGAP20;
Red blood cells	2	166	1.24224	1.44607	0.405785	1	1	1	SEMA7A; PKM;
Thyroid gland	59	7306	36.646	0.964655	0.666282	1	1	1	PCK2; DCAF11; COX5A; ZWINT; ETFA; ISLR; PML; BAG3; PKM; CYP1A2; PSMA4; CHRNA3; CSPG4; MPI; MINPP1; CSK; CYP1A1; TSPAN3; PRKG1; UBL7; SCAMP2; CRABP1; PARP6; PTEN; PRDX3; CYP11A1; DKK1; ARIH1; STOML1; NRG4; PEAK1; RGS10; DNAJA4; SIN3A; NEO1; HECW1; COA1; PCLO; TSPAN9; ABCC9; MLXIP; IL31; CLIP1; RILPL2; ANKRD6; GPR142; PRKCA; TANC2; ABLIM3; SPOCK1; MGAT5; HSPD1; HSPE1; CASP8; MRPS36; PTGES; RDX; TSK…
H460	10	736	6.21118	1.62434	0.0905174	1	0.924804	1	BAG3; PKM; MINPP1; PRDX3; CNTN1; SPOCK1; MGAT5; HSPD1; HSPE1; TSKU;
Heart muscle	50	6191	31.0559	0.964766	0.650488	1	1	1	DCAF11; COX5A; ZWINT; ETFA; PML; BAG3; PKM; CYP1A2; PSMA4; CHRNA3; CSPG4; MPI; SLIT1; MINPP1; CSK; CYP1A1; TSPAN3; PRKG1; SCAMP2; CRABP1; PRDX3; CYP11A1; SNUPN; DKK1; ARIH1; PEAK1; RGS10; GRK5; SIN3A; NEO1; HECW1; COA1; PCLO; TSPAN9; MLXIP; CLIP1; RILPL2; ANKRD6; GPR142; PRKCA; TANC2; ABLIM3; SPOCK1; MGAT5; HSPD1; HSPE1; CASP8; MRPS36; RDX; TSKU;
B Cell	19	2254	11.8012	1.00729	0.524071	1	1	1	PCK2; COX5A; ETFA; BAG3; PKM; PSMA4; CSK; SCAMP2; IREB2; PRDX3; ADPGK; EIF3A; SIN3A; RAB35; HSPD1; HSPE1; RDX; POU2AF1; RPS28;
Spinal cord	20	1465	12.4224	1.6313	0.0206764	1	0.671827	1	ISLR; LMAN1L; ISL2; UBL7; INPP5F; MYO9A; STOML1; RAB11FIP2; SCAPER; EIF3A; PEAK1; HECW1; ABCC9; TANC2; ABLIM3; SPOCK1; KLHL29; PTGES; ZC3H12C; ARHGAP20;
Malignant glioma	58	7169	36.0248	0.96643	0.657918	1	1	1	PCK2; DCAF11; COX5A; ZWINT; ETFA; PSTPIP1; PML; BAG3; PKM; CYP1A2; PSMA4; CHRNA3; CSPG4; MPI; MINPP1; CSK; CYP1A1; TSPAN3; PRKG1; SCAMP2; CRABP1; PARP6; PTEN; PRDX3; CYP11A1; SNUPN; DKK1; ARIH1; NRG4; PEAK1; GRK5; DNAJA4; SIN3A; NEO1; HECW1; COA1; PCLO; TSPAN9; ABCC9; CNTN1; MLXIP; IL31; CLIP1; RILPL2; ANKRD6; GPR142; PRKCA; TANC2; ABLIM3; SPOCK1; MGAT5; HSPD1; HSPE1; CASP8; MRPS36; CCNB1; RDX; T…
Cervical cancer	63	7426	39.1304	1.0134	0.476397	1	1	1	PCK2; DCAF11; COX5A; ZWINT; ETFA; PSTPIP1; PML; BAG3; LINGO1; PKM; CYP1A2; PSMA4; CHRNA3; CSPG4; MPI; SLIT1; MINPP1; CSK; CYP1A1; TSPAN3; PRKG1; SCAMP2; CRABP1; PARP6; PTEN; PRDX3; CYP11A1; SNUPN; DKK1; ARIH1; NRG4; PEAK1; RGS10; GRK5; DNAJA4; SIN3A; NEO1; HECW1; COA1; PCLO; TSPAN9; ABCC9; CNTN1; MLXIP; IL31; CLIP1; RILPL2; ANKRD6; GPR142; PRKCA; TANC2; ABLIM3; SPOCK1; MGAT5; HSPD1; HSPE1; CASP8;…
Malignant melanoma	60	7459	37.2671	0.96088	0.682324	1	1	1	PCK2; DCAF11; COX5A; ZWINT; ETFA; PML; BAG3; LINGO1; PKM; CYP1A2; PSMA4; CHRNA3; CSPG4; MPI; SLIT1; MINPP1; CSK; CYP1A1; TSPAN3; PRKG1; SCAMP2; CRABP1; PARP6; PTEN; PRDX3; CYP11A1; SNUPN; DKK1; ARIH1; NRG4; PEAK1; RGS10; GRK5; DNAJA4; SIN3A; NEO1; HECW1; COA1; PCLO; TSPAN9; ABCC9; CNTN1; MLXIP; CLIP1; RILPL2; ANKRD6; GPR142; PRKCA; TANC2; ABLIM3; SPOCK1; MGAT5; HSPD1; HSPE1; CASP8; MRPS36; CCNB1;…
Oesophagus	7	921	4.34783	0.909034	0.656501	1	1	1	BAG3; CHRNA3; PTEN; CLIP1; HSPD1; CCNB1; PTGES;
Embryonal carcinoma cells	9	1232	5.59006	0.873448	0.710595	1	1	1	SEMA7A; ATAD1; NPTN; CSPG4; SCAMP2; EIF3A; NEO1; GOLT1B; RAB35;
ES2	41	3527	25.4658	1.3887	0.0149414	1	0.671827	1	PCK2; COX5A; SEMA7A; SEC23IP; ETFA; PML; CSTF2T; BAG3; WDR61; PKM; PAPSS2; PSMA4; MPI; MINPP1; CSK; SCAMP2; MYO9A; RCN2; PRDX3; SNUPN; DKK1; EDC3; EIF3A; LOXL1; RGS10; NEO1; PCLO; GOLT1B; CLIP1; PRPSAP1; PRKCA; PDHX; MGAT5; HSPE1; CASP8; MRPS36; CCNB1; PACSIN2; RDX; POLR2E; RPS28;
Ovary	77	8592	47.8261	1.07048	0.23336	1	1	1	DCAF11; COX5A; SEMA7A; SEC23IP; ZWINT; NEIL1; ETFA; ISLR; PML; BAG3; PKM; CYP1A2; PAPSS2; PSMA4; A1CF; CSPG4; MPI; MINPP1; ARID3B; CSK; CYP1A1; PRKG1; UBL7; COMMD4; INPP5F; SCAMP2; CRABP1; PARP6; RCN2; PRDX3; CYP11A1; DKK1; ARIH1; STOML1; RAB11FIP2; SCAPER; MAN2C1; EIF3A; PEAK1; GRK5; SIN3A; NEO1; HECW1; PCLO; ST7L; DDX11; TSPAN9; GOLT1B; ABCC9; CNTN1; RAB35; MLXIP; CLIP1; RILPL2; ANKRD6; GPR142;…
Liver cancer	61	7697	37.8882	0.946685	0.73676	1	1	1	PCK2; DCAF11; COX5A; ZWINT; ETFA; PML; BAG3; LINGO1; PKM; CYP1A2; PSMA4; CHRNA3; CSPG4; MPI; SLIT1; MINPP1; CSK; CYP1A1; TSPAN3; PRKG1; SCAMP2; CRABP1; PARP6; PTEN; PRDX3; CYP11A1; SNUPN; DKK1; ARIH1; NRG4; PEAK1; RGS10; GRK5; DNAJA4; SIN3A; NEO1; HECW1; COA1; PCLO; TSPAN9; ABCC9; MLXIP; IL31; CLIP1; RILPL2; ANKRD6; GPR142; PRKCA; TANC2; ABLIM3; SPOCK1; MGAT5; HSPD1; HSPE1; CASP8; ALS2CR12; MRPS3…
Dendritic cells	24	1954	14.9068	1.46755	0.0358717	1	0.671827	1	COX5A; SEC23IP; ETFA; WDR61; PKM; NPTN; PSMA4; CSK; COMMD4; PRDX3; ADPGK; EIF3A; PEAK1; RGS10; GRK5; GOLT1B; RAB35; CLIP1; HSPD1; HSPE1; MRPS36; PACSIN2; RDX; RPS28;
OVCAR3	44	3714	27.3292	1.41526	0.00819614	1	0.671827	1	PCK2; COX5A; SEMA7A; ATAD1; SEC23IP; ZWINT; ETFA; PML; CSTF2T; BAG3; WDR61; PKM; NPTN; PSMA4; TIAL1; MPI; MINPP1; CACUL1; COMMD4; SCAMP2; CRABP1; RCN2; PRDX3; EDC3; ARIH1; ADPGK; EIF3A; LOXL1; RGS10; GOLT1B; RAB35; CLIP1; RRAGD; PRPSAP1; NTN1; PDHX; HSPE1; MRPS36; CENPH; CCNB1; PACSIN2; RDX; POLR2E; RPS28;
Huh7	21	2976	13.0435	0.843176	0.832828	1	1	1	NRL; SGMS1; SEC23IP; ETFA; PML; WDR61; PKM; PSMA4; A1CF; CSPG4; SLIT1; MINPP1; CSK; IREB2; PRDX3; EDC3; EIF3A; PDHX; YTHDC2; HSPD1; LRRC32;
Serum	72	7685	44.7205	1.11912	0.124021	1	1	1	PCK2; ATAD1; SEC23IP; ZWINT; CHRNB4; C15orf59; ETFA; BBS4; ISLR; PML; CSTF2T; BAG3; WDR61; PKM; PAPSS2; PSMA4; A1CF; CSPG4; MPI; CCDC33; MINPP1; CSK; UBL7; SNX33; MYO9A; RCN2; IREB2; PRDX3; CYP11A1; SNUPN; DKK1; EDC3; ARIH1; STOML1; SCAPER; EIF3A; PEAK1; RGS10; SIN3A; NEO1; TBC1D21; HECW1; ZPBP; ST7L; DDX11; ABCC9; CNTN1; RAB35; MLXIP; CLIP1; RILPL2; ANKRD6; PDHX; ABLIM3; YTHDC2; MGAT5; PKP4; HSP…
Lens	14	1037	8.69565	1.61355	0.0530644	1	0.703103	1	PCK2; SEC23IP; ETFA; PML; PKM; NPTN; PSMA4; MPI; CSK; PRDX3; ADPGK; EIF3A; RABL6; PACSIN2;
Breast	51	6413	31.677	0.949992	0.701606	1	1	1	DCAF11; COX5A; ZWINT; ETFA; PML; BAG3; PKM; PSMA4; CSPG4; MPI; MINPP1; CSK; CYP1A1; PRKG1; SCAMP2; CRABP1; PARP6; PTEN; PRDX3; CYP11A1; SNUPN; DKK1; ARIH1; NRG4; PEAK1; RGS10; GRK5; DNAJA4; SIN3A; NEO1; HECW1; COA1; PCLO; TSPAN9; ABCC9; MLXIP; IL31; CLIP1; RILPL2; ANKRD6; GPR142; TANC2; ABLIM3; MGAT5; HSPD1; HSPE1; CASP8; ALS2CR12; MRPS36; CCNB1; RDX;
Hair	6	817	3.72671	0.878565	0.684786	1	1	1	PKM; PSMA4; PRDX3; EIF3A; PTPN9; HSPE1;
H520	11	843	6.8323	1.55984	0.0969728	1	0.967447	1	SEMA7A; WDR61; PKM; PSMA4; MINPP1; NEO1; CNTN1; SPOCK1; MGAT5; HSPE1; TSKU;
Nipple aspirate fluid	7	754	4.34783	1.11037	0.444971	1	1	1	ISLR; PKM; PRDX3; DKK1; CNTN1; HSPE1; TSKU;
Uterus	12	917	7.45342	1.56421	0.0840358	1	0.902055	1	TSPAN3; PRKG1; MYO9A; PTEN; CYP11A1; STOML1; EIF3A; ABCC9; IL31; SPOCK1; HSPE1; PTGES;
Tracheobronchial cells	2	47	1.24224	5.10661	0.058937	1	0.757251	1	PKM; RDX;
T24	2	123	1.24224	1.95156	0.27527	1	1	1	PKM; SPOCK1;
CPE_SCX_fractionated	26	2331	16.1491	1.33267	0.0773107	1	0.862624	1	SEC23IP; ETFA; PML; CSTF2T; BAG3; WDR61; PKM; NPTN; PAPSS2; PSMA4; TIAL1; MINPP1; CSK; COMMD4; PRDX3; EDC3; ARIH1; EIF3A; RGS10; RAB35; PDHX; YTHDC2; HSPE1; PTGES; RABL6; RDX;
CRC	40	4247	24.8447	1.12515	0.223694	1	1	1	PCK2; COX5A; SEMA7A; ATAD1; SEC23IP; ETFA; BAG3; WDR61; PKM; PSMA4; TIAL1; CSPG4; MPI; MINPP1; CSK; TSPAN3; COMMD4; SCAMP2; STRA6; PRDX3; SNUPN; DKK1; EIF3A; RGS10; NEO1; CNTN1; RAB35; TANC2; PDHX; SPOCK1; MGAT5; HSPD1; HSPE1; MRPS36; LCN15; RABL6; RDX; POLR2E; RPS28; FDX1;
Preadipocytes	5	510	3.10559	1.17324	0.424633	1	1	1	ISLR; PKM; PSMA4; SPOCK1; RDX;
Fetal hepatocytes	35	3784	21.7391	1.10501	0.282785	1	1	1	DCAF11; SGMS1; SEMA7A; SEC23IP; ETFA; RPP25; PML; WDR61; PKM; PSMA4; CSPG4; MPI; SLIT1; CSK; NR2E3; IREB2; PRDX3; EDC3; ARIH1; ADPGK; RGS10; LRRC49; NEO1; DDX11; MLXIP; SYT3; ANKRD6; NTN1; PDHX; ABLIM3; SPOCK1; YTHDC2; HSPD1; PACSIN2; RDX;
Amniotic fluid	7	566	4.34783	1.47918	0.197325	1	1	1	SEMA7A; ISLR; PKM; CSPG4; MINPP1; DKK1; NEO1;
Vulva/anal skin	51	6377	31.677	0.955355	0.683874	1	1	1	PCK2; DCAF11; COX5A; ZWINT; ETFA; PML; BAG3; PKM; CYP1A2; PSMA4; CHRNA3; CSPG4; SLIT1; MINPP1; CYP1A1; PRKG1; SCAMP2; CRABP1; PARP6; PTEN; PRDX3; CYP11A1; SNUPN; DKK1; ARIH1; NRG4; PEAK1; RGS10; GRK5; DNAJA4; SIN3A; NEO1; HECW1; TSPAN9; CNTN1; MLXIP; IL31; CLIP1; RILPL2; ANKRD6; GPR142; PRKCA; TANC2; ABLIM3; MGAT5; HSPD1; HSPE1; CASP8; ALS2CR12; MRPS36; CCNB1;
	17	1183	10.559	1.71729	0.0207471	1	0.671827	1	ETFA; PKM; NPTN; TIAL1; CSPG4; CSK; PRKG1; SCAMP2; STRA6; PRDX3; CYP11A1; ULK3; PRKCA; PDHX; PTGES; PACSIN2; FDX1;
HH4	25	2684	15.528	1.1129	0.31409	1	1	1	PCK2; ETFA; PSTPIP1; BBS4; PML; PKM; PSMA4; TMEM202; CSPG4; MPI; MINPP1; CSK; PRDX3; PPCDC; ARIH1; LRRC49; ANKRD6; GPR142; PDHX; ABLIM3; YTHDC2; HSPD1; CASP8; CCNB1; RDX;
Ramos	16	1566	9.93789	1.22102	0.238141	1	1	1	COX5A; SEC23IP; WDR61; PKM; TIAL1; CSK; COMMD4; MCMBP; PRDX3; ULK3; EIF3A; GOLT1B; PRKCA; HSPE1; CCNB1; POU2AF1;
Leukocytes	25	2845	15.528	1.04992	0.429819	1	1	1	COX5A; NEIL1; PSTPIP1; PML; BAG3; PKM; PSMA4; ARID3B; CSK; UBL7; INPP5F; SCAMP2; MYO9A; PRDX3; STOML1; EIF3A; CLK3; RGS10; MLXIP; HSPD1; CASP8; INVS; PTGES; PACSIN2; ST3GAL4;
Renal cancer	60	7121	37.2671	1.00649	0.505016	1	1	1	PCK2; DCAF11; COX5A; ZWINT; ETFA; PML; BAG3; PKM; CYP1A2; PSMA4; CSPG4; MPI; SLIT1; MINPP1; CSK; CYP1A1; TSPAN3; PRKG1; SCAMP2; CRABP1; PARP6; PTEN; PRDX3; CYP11A1; SNUPN; DKK1; ARIH1; NRG4; PEAK1; RGS10; GRK5; DNAJA4; SIN3A; NEO1; HECW1; COA1; PCLO; TSPAN9; ABCC9; CNTN1; MLXIP; IL31; CLIP1; RILPL2; ANKRD6; GPR142; PRKCA; TANC2; ABLIM3; SPOCK1; MGAT5; HSPD1; HSPE1; CASP8; ALS2CR12; MRPS36; CCNB1;…
Aorta	10	530	6.21118	2.25568	0.0139407	1	0.671827	1	BAG3; PKM; PRKG1; STOML1; EIF3A; ABCC9; SPOCK1; HSPD1; PTGES; RDX;
Thyroid	5	889	3.10559	0.673066	0.870829	1	1	1	PTEN; CLIP1; PRKCA; HSPD1; CASP8;
hupo46_reference_cam	15	1042	9.31677	1.72042	0.0286782	1	0.671827	1	COX5A; SEMA7A; ATAD1; BAG3; PKM; NPTN; PRDX3; ADPGK; GOLT1B; CNTN1; RAB35; PRPSAP1; PRKCA; PDHX; HSPE1;
Substantia nigra	17	1146	10.559	1.77273	0.0157135	1	0.671827	1	CHRNB4; LINGO1; CHRNA3; INPP5F; STOML1; RAB11FIP2; CHRNA5; SCAPER; EIF3A; PEAK1; TANC2; ABLIM3; SPOCK1; KLHL29; PTGES; ZC3H12C; ARHGAP20;
Vagina	44	5307	27.3292	0.99044	0.560488	1	1	1	DCAF11; COX5A; ZWINT; ETFA; PML; BAG3; PKM; CHRNA3; CSPG4; MPI; MINPP1; PRKG1; SCAMP2; CRABP1; PTEN; PRDX3; SNUPN; DKK1; ARIH1; PEAK1; RGS10; DNAJA4; SIN3A; NEO1; HECW1; PCLO; TSPAN9; MLXIP; IL31; CLIP1; ANKRD6; GPR142; PRKCA; TANC2; ABLIM3; SPOCK1; MGAT5; HSPD1; HSPE1; CASP8; ALS2CR12; MRPS36; CCNB1; TSKU;
Monocytes	5	745	3.10559	0.80316	0.752058	1	1	1	COX5A; SEMA7A; SCAMP2; GOLT1B; HSPD1;
MDA-MB-468	7	770	4.34783	1.0873	0.466778	1	1	1	PCK2; ETFA; PKM; PRDX3; EIF3A; HSPE1; PACSIN2;
Platelets	23	2168	14.2857	1.2676	0.139075	1	1	1	COX5A; ETFA; PML; PKM; PSMA4; CSK; PRKG1; SCAMP2; PTEN; PRDX3; PPCDC; STOML1; RGS10; PCLO; TSPAN9; RAB35; CLIP1; PRKCA; HSPD1; HSPE1; PACSIN2; RDX; LRRC32;
HL60	8	545	4.96894	1.75531	0.0879946	1	0.913747	1	PKM; NPTN; PSMA4; TSPAN3; SCAMP2; PRDX3; ADPGK; RAB35;
TOV21G	16	904	9.93789	2.11517	0.0038453	1	0.671827	1	SEMA7A; CSTF2T; PKM; PSMA4; TIAL1; MINPP1; PRDX3; DKK1; LOXL1; SIN3A; NEO1; CLIP1; MGAT5; HSPD1; HSPE1; TSKU;
Oral mucosa	44	5861	27.3292	0.896821	0.830686	1	1	1	DCAF11; COX5A; ZWINT; ETFA; PML; BAG3; PKM; PSMA4; CSPG4; MPI; MINPP1; CSK; CYP1A1; PRKG1; SCAMP2; CRABP1; PARP6; PRDX3; SNUPN; DKK1; ARIH1; NRG4; PEAK1; RGS10; SIN3A; NEO1; HECW1; PCLO; MLXIP; IL31; CLIP1; RILPL2; ANKRD6; GPR142; PRKCA; TANC2; ABLIM3; SPOCK1; MGAT5; HSPD1; CASP8; ALS2CR12; MRPS36; CCNB1;
Esophagus	47	6034	29.1925	0.930488	0.751646	1	1	1	DCAF11; COX5A; ZWINT; ETFA; PML; BAG3; LINGO1; PKM; PSMA4; CHRNA3; CSPG4; MINPP1; CSK; CYP1A1; PRKG1; SCAMP2; CRABP1; PARP6; PTEN; PRDX3; SNUPN; DKK1; ARIH1; PEAK1; RGS10; GRK5; DNAJA4; SIN3A; NEO1; PCLO; TSPAN9; MLXIP; IL31; CLIP1; ANKRD6; GPR142; PRKCA; TANC2; ABLIM3; MGAT5; HSPD1; HSPE1; CASP8; ALS2CR12; MRPS36; CCNB1; TSKU;
Corpus callosum	14	988	8.69565	1.69357	0.0380113	1	0.685821	1	LINGO1; CHRNA3; SLIT1; INPP5F; RAB11FIP2; SCAPER; PEAK1; HECW1; TANC2; ABLIM3; KLHL29; PTGES; ZC3H12C; ARHGAP20;
NB4	12	711	7.45342	2.01741	0.0166192	1	0.671827	1	COX5A; SEMA7A; PKM; NPTN; TSPAN3; ADPGK; NEO1; RAB35; MGAT5; HSPD1; HSPE1; ST3GAL4;
Mammary gland	9	760	5.59006	1.4159	0.187756	1	1	1	CYP1A1; PTEN; CYP11A1; STOML1; EIF3A; NEO1; SPOCK1; PKP4; PTGES;
031003_BALF2	8	1102	4.96894	0.868108	0.710285	1	1	1	SEC23IP; ETFA; WDR61; PKM; PSMA4; MPI; PRDX3; PACSIN2;
Tears	4	510	2.48447	0.939058	0.621468	1	1	1	PKM; PSMA4; MPI; CENPH;
Cellzome_Abl_inhibitors_NatureBiotechnology_exp144	3	186	1.86335	1.93267	0.204613	1	1	1	CSK; EIF3A; PRKCA;
CaOV3	41	3355	25.4658	1.4599	0.00649783	1	0.671827	1	PCK2; COX5A; ATAD1; SEC23IP; ETFA; PML; CSTF2T; BAG3; WDR61; PKM; NPTN; PAPSS2; PSMA4; TIAL1; MPI; MINPP1; CACUL1; UBL7; SCAMP2; CRABP1; RCN2; PRDX3; DKK1; EDC3; ADPGK; EIF3A; RGS10; NEO1; GOLT1B; CLIP1; PRPSAP1; SPOCK1; HSPE1; CASP8; MRPS36; PTGES; PACSIN2; RDX; TSKU; POLR2E; RPS28;
Cerebrospinal fluid	14	1059	8.69565	1.58003	0.0610121	1	0.762835	1	SEMA7A; ISLR; LINGO1; PKM; CSPG4; SLIT1; MINPP1; CRABP1; NEO1; ABCC9; CNTN1; CLIP1; SPOCK1; RDX;
Melanoma	23	1826	14.2857	1.50501	0.0309983	1	0.671827	1	COX5A; ATAD1; ETFA; PML; WDR61; PKM; NPTN; PSMA4; TIAL1; CSPG4; MINPP1; COMMD4; PRDX3; MAN2C1; EIF3A; RGS10; ANKRD6; PRKCA; HSPD1; HSPE1; INVS; RDX; POLR2E;
Subthalamic nucleus	11	882	6.8323	1.49087	0.12202	1	1	1	LINGO1; SLIT1; INPP5F; STOML1; RAB11FIP2; PEAK1; TANC2; ABLIM3; KLHL29; ZC3H12C; ARHGAP20;
Melanocytes	2	71	1.24224	3.38067	0.119257	1	1	1	CSPG4; TSPAN3;
Dentin	2	246	1.24224	0.975821	0.612838	1	1	1	PKM; HSPD1;
J82	4	216	2.48447	2.21716	0.108157	1	1	1	BAG3; PKM; HSPE1; RPS28;
15_clinprot_c3	7	749	4.34783	1.11778	0.438126	1	1	1	ETFA; PKM; PRDX3; EIF3A; SIN3A; HSPE1; POLR2E;
Ubiquitous	10	1052	6.21118	1.13643	0.386374	1	1	1	SGMS1; BBS4; PML; CSK; INPP5F; CRABP1; RCN2; STK17A; PACSIN2; ACER3;
Cortex	8	683	4.96894	1.40066	0.214443	1	1	1	COX5A; ETFA; PKM; NPTN; PRDX3; CNTN1; PRKCA; HSPE1;
17_wcx	11	1438	6.8323	0.914433	0.666084	1	1	1	PCK2; SEC23IP; ETFA; BAG3; PKM; NPTN; PSMA4; CSK; PRDX3; SIN3A; PDHX;
hupo1_b2-edta_cam	4	316	2.48447	1.51555	0.272969	1	1	1	ISLR; PKM; NPTN; MINPP1;
H23	12	896	7.45342	1.60087	0.0736131	1	0.843567	1	PKM; PSMA4; MINPP1; PRDX3; DKK1; NEO1; CLIP1; SPOCK1; MGAT5; HSPD1; HSPE1; TSKU;
YTS	18	1888	11.1801	1.13929	0.316315	1	1	1	SGMS1; ATAD1; SEC23IP; PSTPIP1; PKM; CSK; TSPAN3; SCAMP2; RCN2; EDC3; STOML1; ADPGK; EIF3A; CLK3; GOLT1B; RAB35; HSPD1; ST3GAL4;
hupo1_b2-hep_cam	8	848	4.96894	1.12813	0.416493	1	1	1	COX5A; ATAD1; PKM; SCAMP2; ADPGK; DNAJA4; GOLT1B; RAB35;
Ileum	3	201	1.86335	1.78844	0.237445	1	1	1	CHRNA3; PRKG1; PTGES;
Embryonic stem cells	36	3047	22.3602	1.41148	0.0182941	1	0.671827	1	PCK2; COX5A; SEMA7A; ATAD1; SEC23IP; ZWINT; ETFA; CSTF2T; LINGO1; PKM; NPTN; PAPSS2; PSMA4; TIAL1; CSPG4; ARID3B; TSPAN3; INPP5F; MCMBP; SCAMP2; ADPGK; EIF3A; NEO1; COA1; DDX11; TSPAN9; GOLT1B; CNTN1; RAB35; TMEM98; PDHX; YTHDC2; PKP4; HSPD1; HSPE1; CCNB1;
Saliva	5	912	3.10559	0.656092	0.884506	1	1	1	COX5A; PKM; HSPE1; LCN15; RDX;
Nuclear	13	1319	8.07453	1.17803	0.311693	1	1	1	PCK2; SENP8; WDR61; PKM; TIAL1; MINPP1; PRDX3; SNUPN; ARIH1; EIF3A; PDHX; YTHDC2; POLR2E;
N06CS98-2	2	165	1.24224	1.45483	0.402857	1	1	1	EIF3A; PEAK1;
MV4-11	6	382	3.72671	1.879	0.102273	1	1	1	TIAL1; CSK; PRDX3; ULK3; EIF3A; CCNB1;
Caudate nucleus	16	1204	9.93789	1.58814	0.0452337	1	0.686061	1	LINGO1; CHRNA3; SLIT1; INPP5F; STOML1; RAB11FIP2; SCAPER; EIF3A; PEAK1; TANC2; ABLIM3; SPOCK1; KLHL29; PTGES; ZC3H12C; ARHGAP20;
Retina	7	364	4.34783	2.30002	0.0338393	1	0.671827	1	NRL; BBS4; ISLR; TSPAN3; NR2E3; ABCC9; HSPD1;
Medulla oblongata	8	473	4.96894	2.0225	0.0458943	1	0.686061	1	PRLHR; LINGO1; MYO9A; STOML1; EIF3A; ZPBP; SPOCK1; PTGES;
Bladder cancer cells	4	369	2.48447	1.29788	0.37304	1	1	1	PKM; SNX33; EIF3A; RDX;
PC3(AR)6	4	262	2.48447	1.8279	0.177608	1	1	1	SEMA7A; PSMA4; PRDX3; RDX;
Neutrophils	3	393	1.86335	0.914723	0.6424	1	1	1	PKM; PRDX3; PTPN9;
Parathyroid	3	782	1.86335	0.459707	0.961828	1	1	1	CRABP1; CLIP1; HSPD1;
HEK293	50	4439	31.0559	1.34554	0.0120464	1	0.671827	1	PCK2; DCAF11; COX5A; ATAD1; SEC23IP; ETFA; SENP8; PML; CSTF2T; BAG3; WDR61; PKM; NPTN; PAPSS2; PSMA4; TIAL1; MPI; MINPP1; ARID3B; CACUL1; CSK; COMMD4; SCAMP2; RCN2; PTEN; PRDX3; EDC3; ARIH1; ADPGK; EIF3A; PTPN9; RGS10; SIN3A; GOLT1B; RAB35; CLIP1; PRPSAP1; PRKCA; PDHX; YTHDC2; PKP4; HSPE1; CASP8; MRPS36; CENPH; CCNB1; RABL6; PACSIN2; RDX; POLR2E;
A549	13	997	8.07453	1.55849	0.0756312	1	0.855136	1	COX5A; ATAD1; ETFA; PKM; RCN2; PRDX3; RAB11FIP2; MAN2C1; DDX11; CLIP1; PDHX; HSPD1; MRPS36;
Semen	13	966	8.07453	1.6085	0.0622726	1	0.765321	1	SEMA7A; PKM; PSMA4; MPI; MINPP1; NEO1; ZPBP; SPOCK1; HSPD1; LCN15; PACSIN2; RDX; B3GNT6;
Temporal cortex	1	51	0.621118	2.36479	0.349066	1	1	1	CHRNA3;
Keratinocytes	1	250	0.621118	0.482493	0.879449	1	1	1	CHRNA3;
Fetus	34	2992	21.118	1.3576	0.0363374	1	0.671827	1	COX5A; CHRNB4; BBS4; ISLR; SENP8; PML; CHRNA3; A1CF; SLIT1; TSPAN3; INPP5F; NR2E3; IREB2; STOML1; RAB11FIP2; SCAPER; EIF3A; PEAK1; HECW1; ST7L; CNTN1; TANC2; SPOCK1; KLHL29; MGAT5; CASP8; INVS; PTGES; RABL6; ZC3H12C; ST3GAL4; FDX1; B3GNT6; ARHGAP20;
MCF7	4	317	2.48447	1.51077	0.274823	1	1	1	BAG3; PKM; PSMA4; NEO1;
Adducin	6	486	3.72671	1.47692	0.223177	1	1	1	ETFA; PML; PKM; MPI; ADPGK; YTHDC2;
MCF10A	10	661	6.21118	1.80864	0.0516195	1	0.703103	1	BAG3; PKM; TIAL1; PRDX3; DKK1; EIF3A; SPOCK1; HSPE1; RDX; RPS28;
041803_BALF3	9	1103	5.59006	0.9756	0.580185	1	1	1	PML; PKM; NPTN; PSMA4; MINPP1; IREB2; PRDX3; EIF3A; PACSIN2;
Macrophages	1	274	0.621118	0.440232	0.901752	1	1	1	HSPD1;
Muscle	13	904	8.07453	1.71882	0.0405448	1	0.686061	1	COX5A; SEMA7A; BAG3; PKM; MPI; MINPP1; RCN2; CLK3; RAB35; CLIP1; PRKCA; PDHX; CASP8;
MicroProt2	5	561	3.10559	1.06658	0.507251	1	1	1	ETFA; PKM; MINPP1; LOXL1; HSPE1;
Hypothalamus	2	147	1.24224	1.63296	0.349106	1	1	1	PRLHR; SLIT1;
Ventricles	2	151	1.24224	1.58971	0.361207	1	1	1	PRKG1; PTGES;
Endometrium	7	1202	4.34783	0.696525	0.882783	1	1	1	TSPAN3; PTEN; CLIP1; PRKCA; HSPD1; CASP8; CCNB1;
Thalamus	18	1141	11.1801	1.88517	0.00721428	1	0.671827	1	CHRNB4; PRLHR; LINGO1; CHRNA3; INPP5F; STOML1; RAB11FIP2; CHRNA5; SCAPER; EIF3A; PEAK1; TANC2; ABLIM3; SPOCK1; KLHL29; PTGES; ZC3H12C; ARHGAP20;
Putamen	7	527	4.34783	1.58864	0.154261	1	1	1	LINGO1; SLIT1; MYO9A; STOML1; EIF3A; SPOCK1; PTGES;
PT45	8	361	4.96894	2.64996	0.0112192	1	0.671827	1	SEMA7A; PKM; PSMA4; MINPP1; DKK1; HSPD1; HSPE1; RDX;
Colorectal cancer cells	7	561	4.34783	1.49236	0.191551	1	1	1	PKM; CSPG4; PRDX3; RAB35; HSPD1; HSPE1; RDX;
Jejunum	2	194	1.24224	1.23737	0.484705	1	1	1	CHRNA3; PTGES;
ARPE-19	7	330	4.34783	2.53698	0.0213356	1	0.671827	1	ETFA; PKM; RCN2; PRDX3; HSPD1; HSPE1; POLR2E;
Temporal lobe	8	477	4.96894	2.00554	0.0477911	1	0.686061	1	PRLHR; LINGO1; SLIT1; MYO9A; STOML1; EIF3A; SPOCK1; PTGES;
RMUG	7	499	4.34783	1.67778	0.126404	1	1	1	PKM; MINPP1; RCN2; SPOCK1; HSPD1; HSPE1; TSKU;
DU145	8	941	4.96894	1.01663	0.533571	1	1	1	ETFA; PKM; SCAMP2; PRDX3; TSPAN9; RAB35; PRKCA; PKP4;
Lacrimal glands	4	453	2.48447	1.05721	0.527622	1	1	1	PKM; PSMA4; MPI; CENPH;
Cervico-vaginal fluid	4	565	2.48447	0.847647	0.700211	1	1	1	PML; PKM; PSMA4; DNAJA4;
Uterine cervix	4	902	2.48447	0.530957	0.947553	1	1	1	PTEN; CLIP1; HSPD1; CCNB1;
Thymus	6	456	3.72671	1.57408	0.184194	1	1	1	MINPP1; MYO9A; NEO1; MLXIP; CASP8; ST3GAL4;
Aspc1	6	483	3.72671	1.48609	0.219158	1	1	1	PKM; PSMA4; DKK1; NEO1; HSPE1; RDX;
Vermiform appendix	6	286	3.72671	2.50969	0.0335347	1	0.671827	1	LMAN1L; CHRNA3; STOML1; EIF3A; SPOCK1; PTGES;
Trachea	7	612	4.34783	1.368	0.253414	1	1	1	ISLR; UBL7; STOML1; EIF3A; IL31; SPOCK1; PTGES;
Astrocytes	1	58	0.621118	2.07943	0.386372	1	1	1	SPOCK1;
050603_BALF11	7	1019	4.34783	0.821611	0.755543	1	1	1	COX5A; ATAD1; PKM; NPTN; SCAMP2; ADPGK; RAB35;
HCC78	4	249	2.48447	1.92333	0.156614	1	1	1	BAG3; PKM; PEAK1; PKP4;
RBC	7	267	4.34783	3.13557	0.00734053	1	0.671827	1	SEMA7A; PKM; NPTN; PSMA4; MINPP1; GOLT1B; RAB35;
Hepatocytes	3	73	1.86335	4.92392	0.0233779	1	0.671827	1	CYP1A1; PRDX3; CCNB1;
Nervous system	2	212	1.24224	1.13231	0.531928	1	1	1	NEO1; CASP8;
HPDE6	6	414	3.72671	1.73377	0.134906	1	1	1	PKM; PSMA4; PRDX3; HSPD1; HSPE1; RDX;
Occipital lobe	7	359	4.34783	2.33205	0.0317509	1	0.671827	1	PRLHR; SLIT1; MYO9A; STOML1; EIF3A; SPOCK1; PTGES;
N06CS97	1	270	0.621118	0.446754	0.898342	1	1	1	HSPE1;
Blood vessels	1	130	0.621118	0.927836	0.666023	1	1	1	PML;
MiaPaCa2	6	289	3.72671	2.48364	0.0350131	1	0.671827	1	PKM; PSMA4; PRDX3; HSPD1; HSPE1; RDX;
Intestine	4	508	2.48447	0.942755	0.618376	1	1	1	PSTPIP1; MINPP1; HSPD1; FDX1;
Blood	2	227	1.24224	1.05749	0.568986	1	1	1	SPOCK1; HSPD1;
Stem cell	1	138	0.621118	0.874052	0.687895	1	1	1	PKM;
Pituitary gland	6	494	3.72671	1.453	0.234015	1	1	1	PRLHR; CHRNA3; STOML1; EIF3A; SPOCK1; PTGES;
Caecum	1	36	0.621118	3.34985	0.261364	1	1	1	CHRNA3;
Vulva	5	838	3.10559	0.714028	0.835647	1	1	1	PTEN; CLIP1; HSPD1; CASP8; CCNB1;
B cells	8	533	4.96894	1.79483	0.0797907	1	0.876882	1	PKM; PSMA4; SCAMP2; RAB35; HSPD1; HSPE1; RDX; RPS28;
SH-SY5Y	7	537	4.34783	1.55906	0.164854	1	1	1	PKM; MINPP1; RCN2; PTEN; PRKCA; HSPD1; HSPE1;
Adrenal cortex	1	82	0.621118	1.47089	0.498867	1	1	1	ISLR;
Mesothelioma cells	1	29	0.621118	4.15815	0.216511	1	1	1	PKM;
Hematopoietic stem cells	3	200	1.86335	1.79739	0.235226	1	1	1	PSTPIP1; PTPN9; CCNB1;
Pancreatic fluid	1	136	0.621118	0.886905	0.682564	1	1	1	RAB35;
Natural killer cell	2	106	1.24224	2.26452	0.222636	1	1	1	TIAL1; RDX;
Panc1	6	346	3.72671	2.0745	0.0712549	1	0.839421	1	PKM; PSMA4; DKK1; HSPE1; RDX; RPS28;
Frontal lobe	8	480	4.96894	1.99301	0.049247	1	0.686061	1	PRLHR; LINGO1; SLIT1; MYO9A; STOML1; EIF3A; SPOCK1; PTGES;
Pons	2	134	1.24224	1.79137	0.309309	1	1	1	PRLHR; PTGES;
Breast milk	1	73	0.621118	1.65221	0.45931	1	1	1	RDX;
Lymphocytes	10	468	6.21118	2.5545	0.00614856	1	0.671827	1	CHRNB4; PKM; CHRNA3; A1CF; CYP1A1; CYP11A1; ARIH1; CHRNA5; MAN2C1; CASP8;
01_glyco	8	667	4.96894	1.43426	0.197078	1	1	1	PCK2; ETFA; PKM; NPTN; PRDX3; NEO1; PDHX; KIRREL3;
Nucleus accumbens	3	166	1.86335	2.1655	0.162775	1	1	1	EIF3A; SPOCK1; PTGES;
Bronchoalveolar fluid	1	186	0.621118	0.648503	0.792249	1	1	1	NEO1;
Bronchial epithelial cells	1	69	0.621118	1.74798	0.440748	1	1	1	CHRNA3;
Frontal cortex	2	113	1.24224	2.12425	0.244258	1	1	1	SGMS1; CHRNA3;
Kidney cancer	4	352	2.48447	1.36055	0.340724	1	1	1	PCK2; PKM; EIF3A; PEAK1;
Umbilical vein endothelial cells	1	178	0.621118	0.677647	0.777651	1	1	1	PTGES;
H2228	4	168	2.48447	2.8506	0.0529125	1	0.703103	1	PKM; PEAK1; ABLIM3; PKP4;
Dentate nucleus	1	14	0.621118	8.61013	0.111078	1	1	1	SPOCK1;
Ventricular septum	1	82	0.621118	1.47089	0.498867	1	1	1	PTGES;
Peripheral blood leukocytes	2	125	1.24224	1.92034	0.281472	1	1	1	MYO9A; ST3GAL4;
BJ635	1	175	0.621118	0.689263	0.771918	1	1	1	PKP4;
Mesenchymal stromal cells	6	178	3.72671	4.03234	0.0039054	1	0.671827	1	SEMA7A; CSPG4; TSPAN3; SCAMP2; GOLT1B; PTGES;
Osteoblasts	1	52	0.621118	2.31932	0.354531	1	1	1	NTN1;
H1703	2	138	1.24224	1.73945	0.321619	1	1	1	PEAK1; PKP4;
Ependymal cells	1	9	0.621118	13.3882	0.0728909	1	0.843567	1	SPOCK1;
Cellzome_Abl_inhibitors_NatureBiotechnology_exp142	1	83	0.621118	1.45317	0.503081	1	1	1	CSK;
Adipose tissue	4	155	2.48447	3.08966	0.041474	1	0.686061	1	BBS4; PKM; CYP11A1; PRPSAP1;
WM1158	5	212	3.10559	2.82233	0.0331128	1	0.671827	1	ETFA; PKM; PKP4; HSPD1; HSPE1;
Occipital pole	1	129	0.621118	0.935028	0.663184	1	1	1	LINGO1;
hupo55_b1-cit_cam	1	78	0.621118	1.54631	0.481654	1	1	1	PRPSAP1;
Fibroblats	1	5	0.621118	24.0774	0.0411708	1	0.686061	1	PKM;
Peripheral blood cells	1	140	0.621118	0.861567	0.693137	1	1	1	DDX11;
Syncytiotrophoblast	1	54	0.621118	2.23344	0.365323	1	1	1	PTGES;
Neurons	3	68	1.86335	5.28592	0.0194128	1	0.671827	1	HECW1; CNTN1; SPOCK1;
Purkinje cells	1	35	0.621118	3.44553	0.255116	1	1	1	SPOCK1;
Melanoma cells	1	47	0.621118	2.56601	0.326745	1	1	1	RDX;
Vascular endothelium	1	40	0.621118	3.01495	0.285838	1	1	1	SPOCK1;
Cellzome_Abl_inhibitors_NatureBiotechnology_exp143	1	87	0.621118	1.38637	0.519586	1	1	1	CSK;
Gastric mucosa	2	33	1.24224	7.27239	0.0310428	1	0.671827	1	CYP1A2; CCNB1;
Urothelium	1	33	0.621118	3.65429	0.242462	1	1	1	HSPD1;
Islets of Langerhans	2	135	1.24224	1.7781	0.312391	1	1	1	PKM; HSPD1;
Atrium	3	146	1.86335	2.46213	0.124014	1	1	1	LMAN1L; PRKG1; PTGES;
Parietal lobe	1	111	0.621118	1.08664	0.60778	1	1	1	PTGES;
Cardiac muscle	1	64	0.621118	1.88452	0.416652	1	1	1	HSPE1;
Uterine myometrium	1	77	0.621118	1.56639	0.47726	1	1	1	GRK5;
Neural stem cells	2	67	1.24224	3.58247	0.108371	1	1	1	PCLO; DDX11;
Spermatozoa	2	102	1.24224	2.35331	0.210351	1	1	1	CCNB1; ARHGAP20;
Choroid plexus	1	18	0.621118	6.69783	0.140499	1	1	1	SPOCK1;
Paracentral gyrus	1	48	0.621118	2.51256	0.332396	1	1	1	PTGES;
Trophoblast	1	44	0.621118	2.74092	0.309507	1	1	1	PML;
Tooth	1	32	0.621118	3.76845	0.236056	1	1	1	HSPD1;
Dentate gyrus	1	26	0.621118	4.63775	0.196469	1	1	1	SPOCK1;
Chorion	1	14	0.621118	8.61013	0.111078	1	1	1	PTGES;
Sympathetic nervous system	1	3	0.621118	40.0757	0.0249086	1	0.671827	1	PML;
Pontine nucleus	1	6	0.621118	20.0712	0.0492005	1	0.686061	1	SPOCK1;
Parietal cortex	1	25	0.621118	4.82319	0.189676	1	1	1	CHRNA3;
Intestinal epithelial cells	1	27	0.621118	4.46605	0.203206	1	1	1	PKM;
Insular cortex membrane micro domains	2	75	1.24224	3.20039	0.130401	1	1	1	PKM; CNTN1;
Breast cancer cells	2	36	1.24224	6.66653	0.0364434	1	0.671827	1	ETFA; HSPD1;
Neuroglia	1	11	0.621118	10.9562	0.0883577	1	0.913747	1	SPOCK1;
Osteoclast	1	18	0.621118	6.69783	0.140499	1	1	1	NTN1;
Choriodecidua	1	10	0.621118	12.0507	0.0806566	1	0.876882	1	PTGES;
Myocyte	1	6	0.621118	20.0712	0.0492005	1	0.686061	1	CASP8;
Lymphoid stem cell	1	17	0.621118	7.09159	0.133236	1	1	1	CCNB1;
Hofbauer cells	1	3	0.621118	40.0757	0.0249086	1	0.671827	1	PML;
Capillary endothelial cell	1	4	0.621118	30.0818	0.0330737	1	0.671827	1	PML;
Paraventricular nucleus	1	4	0.621118	30.0818	0.0330737	1	0.671827	1	SPOCK1;
Supra optic nucleus	1	3	0.621118	40.0757	0.0249086	1	0.671827	1	SPOCK1;
Podocyte	1	12	0.621118	10.044	0.0959946	1	0.967447	1	KIRREL3;
Adrenal	1	2	0.621118	60.0139	0.016675	1	0.671827	1	HSPD1;
Pre-B cells	1	4	0.621118	30.0818	0.0330737	1	0.671827	1	HSPD1;
Lymphoid	1	4	0.621118	30.0818	0.0330737	1	0.671827	1	HSPD1;
Claustrum	1	2	0.621118	60.0139	0.016675	1	0.671827	1	SPOCK1;
Pituicyte	1	1	0.621118	119.434	0.00837233	1	0.671827	1	SPOCK1;
Arachnoid mater	1	1	0.621118	119.434	0.00837233	1	0.671827	1	SPOCK1;

## Sheet: Transcription factor
Analysis: Transcription factor
Dataset name: Racing
Number of genes in the dataset: 161
Number of genes in the dataset (which are available in Transcription factor database) :152
Number of genes in background: 19230
Is analysis quantitative: No
						Corrected p-values
Transcription factor	No. of genes in the dataset	No.of genes in the background dataset	Percentage of genes	Fold enrichment	P-value (Hypergeometric test)	Bonferroni method	BH method	Q-value (Storey-Tibshirani method)
MAFB	1	352	0.621118	0.342683	0.949558	1	1	1	RRAGD;
NFIC	18	2040	11.1801	1.05441	0.443967	1	0.88869	1	C15orf59; LINGO1; PAPSS2; TIAL1; PTEN; CYP11A1; STOML1; CLK3; GRK5; DNAJA4; SIN3A; NEO1; COA1; MLXIP; NTN1; CASP8; PTGES; LRRC32;
NR1H3	8	1020	4.96894	0.937896	0.625772	1	0.97765	1	C15orf59; CYP1A1; MCMBP; C15orf39; ADPGK; LOXL1; SIN3A; HECW1;
PITX3	3	265	1.86335	1.35653	0.382923	1	0.85435	1	LMAN1L; HECW1; TSPAN9;
RXRA	10	1113	6.21118	1.07414	0.455839	1	0.88869	1	COX5A; C15orf59; BBS4; LINGO1; CCDC33; CACUL1; CYP1A1; C15orf39; ADPGK; TBC1D21;
SOAT1	13	1261	8.07453	1.23221	0.258112	1	0.785736	1	NRL; BAG3; SNX33; RAB11FIP2; ADPGK; LRRC49; HECW1; ABCC9; NTN1; HSPD1; HSPE1; CASP8; RDX;
STAT1	13	1261	8.07453	1.23221	0.258112	1	0.785736	1	NRL; BAG3; SNX33; RAB11FIP2; ADPGK; LRRC49; HECW1; ABCC9; NTN1; HSPD1; HSPE1; CASP8; RDX;
DLX2	2	171	1.24224	1.40379	0.42032	1	0.879466	1	PTEN; HECW1;
DLX3	3	413	1.86335	0.870427	0.675399	1	1	1	RPP25; PKP4; KIRREL3;
ETS1	30	2496	18.6335	1.43597	0.0254451	1	0.510918	0.843099	SGMS1; PSTPIP1; ISLR; PML; ODF3L1; TIAL1; ARID3B; CSK; FAM45A; INPP5F; PTEN; CYP11A1; C15orf39; STOML1; SCAMP5; CHRNA5; RGS10; LRRC49; COA1; ZPBP; LRRC43; RILPL2; TMEM71; ANKRD6; CASP8; PACSIN2; POU2AF1; ST3GAL4; LRRC32; KIRREL3;
HNF1A	7	831	4.34783	1.00748	0.547691	1	0.920194	1	A1CF; PRKG1; RAB11FIP2; ST7L; HSPD1; HSPE1; KIRREL3;
HOXC9	4	573	2.48447	0.835812	0.710634	1	1	1	PKM; TMEM202; CACUL1; RAB11FIP2;
IRF1	7	811	4.34783	1.03233	0.52165	1	0.897922	1	PML; TIAL1; RAB11FIP2; SIN3A; ALS2CR12; ZC3H12C; ST3GAL4;
LHX3	11	1210	6.8323	1.08674	0.433817	1	0.88869	1	NRL; ATAD1; TIAL1; ARID3B; CACUL1; INPP5F; PTEN; RAB11FIP2; NEO1; TSPAN9; RRAGD;
MEF2A	19	1835	11.8012	1.23729	0.195991	1	0.785736	1	SGMS1; SEMA7A; ATAD1; ETFA; ISL2; CACUL1; FAM45A; DKK1; FAM204A; RAB11FIP2; RGS10; DNAJA4; SIN3A; ST7L; TSPAN9; ABCC9; TMEM71; PRKCA; PKP4;
NKX6-1	13	1408	8.07453	1.10357	0.398697	1	0.85435	1	ISL2; ARID3B; PTEN; RAB11FIP2; CHRNA5; EIF3A; NEO1; HECW1; TSPAN9; CIB4; MGAT5; PKP4; RDX;
OTX2	4	324	2.48447	1.47813	0.287862	1	0.828096	1	SENP8; TIAL1; MYO9A; ABCC9;
PHOX2A	3	442	1.86335	0.813319	0.719208	1	1	1	TIAL1; PRKG1; INPP5F;
POU2F1	21	2209	13.0435	1.13594	0.30113	1	0.837362	1	NRL; SEMA7A; PRLHR; HYKK; TIAL1; A1CF; ARID3B; PRKG1; PARP6; PTEN; RAB11FIP2; TBC1D21; HECW1; STK17A; ST7L; TSPAN9; PRKCA; YTHDC2; PKP4; COLCA2; KIRREL3;
POU3F2	8	789	4.96894	1.21249	0.34124	1	0.85435	1	TIAL1; ARID3B; FAM45A; INPP5F; PTEN; RAB11FIP2; NEO1; MGAT5;
SRF	6	462	3.72671	1.55364	0.191764	1	0.785736	1	NPTN; PRKG1; LOXL1; COA1; TSPAN9; CIB4;
ARID3A	8	1250	4.96894	0.765325	0.828927	1	1	1	TIAL1; MPI; CACUL1; PRKG1; PTEN; FAM204A; RAB11FIP2; PKP4;
EHF	9	753	5.59006	1.42906	0.181021	1	0.785736	1	PSMA4; MINPP1; ARID3B; SCAMP2; ZPBP; HSPD1; HSPE1; CASP8; INVS;
FOXA1	12	804	7.45342	1.78405	0.0380168	1	0.510918	0.843099	ATAD1; LMAN1L; TIAL1; PRKG1; INPP5F; PARP6; PTEN; RAB11FIP2; SIN3A; NEO1; TSPAN9; KIRREL3;
ATF1	7	1037	4.34783	0.80735	0.77133	1	1	1	ATAD1; CSTF2T; PAPSS2; SLIT1; SCAMP5; MLXIP; PKP4;
CREB1	12	973	7.45342	1.47419	0.116182	1	0.739342	1	SGMS1; C15orf59; ODF3L1; ISL2; DKK1; EDC3; ARIH1; SCAMP5; HECW1; MLXIP; YTHDC2; PKP4;
JDP2	8	763	4.96894	1.2538	0.308715	1	0.837362	1	ODF3L1; ISL2; ARIH1; SCAMP5; YTHDC2; PKP4; INVS; B3GNT6;
NFYA	19	2544	11.8012	0.892462	0.738064	1	1	1	NRL; PCK2; DCAF11; HYKK; ISL2; ARID3B; CACUL1; TSPAN3; FAM204A; SCAMP5; SIN3A; TSPAN9; GOLT1B; MLXIP; PKP4; ALS2CR12; MRPS36; INVS; ZC3H12C;
PLAU	7	1037	4.34783	0.80735	0.77133	1	1	1	ATAD1; CSTF2T; PAPSS2; SLIT1; SCAMP5; MLXIP; PKP4;
RORA	8	1168	4.96894	0.819054	0.76867	1	1	1	NRL; ETFA; BAG3; A1CF; CACUL1; EIF3A; CLIP1; CIB4;
YY1	14	1317	8.69565	1.2705	0.213702	1	0.785736	1	NRL; SEC23IP; CSTF2T; UBE2Q2; FAM219B; ARID3B; SCAPER; EIF3A; PKP4; ZC3H12C; RDX; TSKU; COLCA2; POU2AF1;
ELK1	25	1986	15.528	1.50404	0.0250007	1	0.510918	0.843099	NRL; DCAF11; SGMS1; ATAD1; BBS4; TIAL1; SLIT1; MINPP1; ARID3B; CSK; CYP1A1; UBL7; MCMBP; PTEN; SNUPN; EDC3; STOML1; ULK3; LRRC49; SIN3A; COA1; ZPBP; ANKRD6; POLR2E; LRRC32;
GABPA	26	2702	16.1491	1.14969	0.251206	1	0.785736	1	SEC23IP; PSTPIP1; BBS4; WDR61; MINPP1; ARID3B; FAM45A; PRKG1; UBL7; MCMBP; SCAMP2; EDC3; STOML1; PTPN9; RGS10; LRRC49; COA1; ZPBP; DDX11; LRRC43; TMEM71; ANKRD6; MGAT5; CASP8; INVS; FDX1;
CTCF	22	2605	13.6646	1.00911	0.517517	1	0.897922	1	SGMS1; RPP25; LINGO1; CPLX3; CYP1A1; MCMBP; SCAMP2; CLK3; LRRC49; SIN3A; NEO1; TBC1D21; HECW1; ZPBP; TSPAN9; ANKRD6; NTN1; ABLIM3; SPOCK1; CIB4; MGAT5; PACSIN2;
FEV	4	526	2.48447	0.910494	0.645634	1	0.97765	1	TIAL1; GRK5; ST7L; PACSIN2;
HERPUD1	2	421	1.24224	0.570204	0.870677	1	1	1	PRKG1; LRRC43;
KLF7	50	4448	31.0559	1.34282	0.0125138	1	0.510918	0.843099	NRL; PCK2; SEMA7A; CHRNB4; C15orf59; SENP8; BAG3; WDR61; LINGO1; PKM; NPTN; ISL2; CSPG4; MPI; CCDC33; ARID3B; FAM45A; CYP1A1; PRKG1; COMMD4; SCAMP2; MYO9A; STRA6; PTEN; PRDX3; EDC3; ARIH1; STOML1; ADPGK; CHRNA5; MAN2C1; GRK5; SIN3A; DDX11; TSPAN9; GOLT1B; RAB35; RILPL2; PDHX; HSPD1; HSPE1; MRPS36; CCNB1; LCN15; PACSIN2; TSKU; POLR2E; ST3GAL4; FDX1; LRRC32;
MAF	5	466	3.10559	1.28401	0.351578	1	0.85435	1	C15orf59; BAG3; PSMA4; TIAL1; PTEN;
NANOG	5	204	3.10559	2.93301	0.0287307	1	0.510918	0.843099	ATAD1; PTEN; SCAMP5; MRPS36; LRRC32;
NR5A1	10	1129	6.21118	1.05892	0.473968	1	0.88869	1	NRL; SEMA7A; ETFA; SCAMP2; ADPGK; RAB35; ABLIM3; ALS2CR12; POU2AF1; ARHGAP20;
RFX1	27	2158	16.7702	1.49485	0.0214658	1	0.510918	0.843099	NEIL1; PRLHR; ODF3L1; CCDC33; CACUL1; TSPAN3; PRKG1; PTEN; FAM204A; ARIH1; RAB11FIP2; GRK5; DNAJA4; LRRC49; NEO1; TBC1D21; HECW1; ST7L; LRRC43; CLIP1; RRAGD; PDHX; CIB4; C2orf70; ALS2CR12; CENPH; PACSIN2;
RREB1	21	2136	13.0435	1.17476	0.24912	1	0.785736	1	SEMA7A; PSTPIP1; PKM; PAPSS2; ISL2; CSK; PRKG1; INPP5F; DKK1; EDC3; PPCDC; SCAMP5; HECW1; RRAGD; ANKRD6; C2orf70; MGAT5; TSKU; COLCA2; POU2AF1; ST3GAL4;
SF1	10	1129	6.21118	1.05892	0.473968	1	0.88869	1	NRL; SEMA7A; ETFA; SCAMP2; ADPGK; RAB35; ABLIM3; ALS2CR12; POU2AF1; ARHGAP20;
SP1	73	7140	45.3416	1.22127	0.0194634	1	0.510918	0.843099	NRL; PCK2; DCAF11; SGMS1; COX5A; SEMA7A; C15orf59; PSTPIP1; PRLHR; SENP8; BAG3; WDR61; LINGO1; PKM; NPTN; ISL2; UBE2Q2; PSMA4; FAM219B; TIAL1; CSPG4; MPI; SLIT1; CCDC33; MINPP1; ARID3B; CSK; FAM45A; CYP1A1; PRKG1; UBL7; COMMD4; SCAMP2; SNX33; MYO9A; RCN2; IREB2; PTEN; PRDX3; SNUPN; ARIH1; STOML1; ADPGK; ULK3; CHRNA5; MAN2C1; GRK5; SIN3A; NEO1; HECW1; STK17A; VWC2; TSPAN9; RAB35; RILPL2; SYT3; NTN…
SP4	48	4345	29.8137	1.31968	0.0199399	1	0.510918	0.843099	NRL; PCK2; DCAF11; SGMS1; CHRNB4; NEIL1; C15orf59; PRLHR; SENP8; BAG3; LINGO1; PKM; ISL2; UBE2Q2; CHRNA3; MINPP1; ARID3B; CSK; CYP1A1; PRKG1; UBL7; MYO9A; RCN2; IREB2; PTEN; PRDX3; MAN2C1; GRK5; SIN3A; NEO1; HECW1; VWC2; TSPAN9; GOLT1B; RAB35; MLXIP; SYT3; RRAGD; ANKRD6; PDHX; ABLIM3; PKP4; HSPD1; MRPS36; PACSIN2; TSKU; ST3GAL4; LRRC32;
TCF3	27	2140	16.7702	1.50742	0.019475	1	0.510918	0.843099	SGMS1; NEIL1; PKM; UBE2Q2; SLIT1; CCDC33; ARID3B; MCMBP; NR2E3; C15orf39; RAB11FIP2; SCAMP5; SCAPER; SIN3A; HECW1; VWC2; TSPAN9; LRRC43; TMEM71; ABLIM3; CIB4; MGAT5; PACSIN2; ZC3H12C; ACER3; COLCA2; POU2AF1;
OTX1	7	848	4.34783	0.987288	0.56936	1	0.926866	1	PAPSS2; TIAL1; A1CF; RCN2; HECW1; GOLT1B; ABCC9;
PITX1	7	848	4.34783	0.987288	0.56936	1	0.926866	1	PAPSS2; TIAL1; A1CF; RCN2; HECW1; GOLT1B; ABCC9;
E2F1	15	1188	9.31677	1.50899	0.0732925	1	0.668079	1	PRLHR; CSTF2T; LINGO1; PRKG1; INPP5F; MCMBP; CRABP1; SCAPER; LRRC49; SIN3A; PDHX; C2orf70; CENPH; PACSIN2; ST3GAL4;
EGR1	31	3215	19.2547	1.15198	0.220707	1	0.785736	1	NRL; PCK2; SGMS1; CHRNB4; C15orf59; SENP8; WDR61; LINGO1; PKM; NPTN; ISL2; TIAL1; SLIT1; MINPP1; TSPAN3; PRKG1; MCMBP; MYO9A; PTEN; PRDX3; EDC3; ARIH1; SIN3A; HECW1; TSPAN9; GOLT1B; NTN1; ABLIM3; PTGES; PACSIN2; ARHGAP20;
NKX2-1	6	711	3.72671	1.00954	0.550244	1	0.920194	1	TIAL1; PRKG1; FAM204A; RAB11FIP2; RGS10; ANKRD6;
NRF1	20	2037	12.4224	1.17322	0.25817	1	0.785736	1	SEC23IP; ZWINT; SENP8; LINGO1; PSMA4; FAM219B; CACUL1; INPP5F; PARP6; MYO9A; PRDX3; SCAPER; EIF3A; GRK5; DDX11; RAB35; LRRC43; HSPD1; HSPE1; ST3GAL4;
BACH1	4	648	2.48447	0.739076	0.795728	1	1	1	BAG3; TIAL1; RRAGD; CASP8;
HOXB4	7	718	4.34783	1.16604	0.395515	1	0.85435	1	NRL; PKM; ARID3B; MCMBP; IREB2; NEO1; CCNB1;
MEIS2	7	527	4.34783	1.58864	0.154261	1	0.785736	1	SENP8; MYO9A; SCAPER; HECW1; TMEM71; CIB4; PKP4;
NR4A2	11	1042	6.8323	1.26195	0.257024	1	0.785736	1	SEMA7A; ATAD1; SENP8; PRKG1; MYO9A; PTEN; SCAMP5; RAB35; RRAGD; PDHX; FDX1;
PPARA	3	370	1.86335	0.971583	0.601656	1	0.964486	1	ETFA; PRKG1; C15orf39;
PPARG	21	2016	13.0435	1.24469	0.173362	1	0.785736	1	NRL; PCK2; C15orf59; ETFA; PAPSS2; ISL2; CSPG4; SLIT1; CCDC33; CSK; CYP1A1; PRKG1; STRA6; PRDX3; C15orf39; ADPGK; SCAPER; COA1; SYT3; HSPD1; HSPE1;
HSF1	13	806	8.07453	1.92781	0.0181115	1	0.510918	0.843099	WDR61; NR2E3; RCN2; STOML1; DNAJA4; HECW1; ABCC9; IL31; CLIP1; HSPD1; HSPE1; INVS; PACSIN2;
ETV7	13	1049	8.07453	1.48124	0.101969	1	0.713781	1	PSTPIP1; PAPSS2; TIAL1; FAM45A; SCAMP2; EDC3; RGS10; LRRC49; COA1; LRRC43; TMEM71; CASP8; INVS;
NR5A2	8	486	4.96894	1.9684	0.0522448	1	0.577442	0.952876	NRL; DCAF11; NPTN; TMEM202; FAM45A; PRKG1; CLIP1; ABLIM3;
TEAD1	5	422	3.10559	1.41789	0.279432	1	0.81501	1	SNX33; ULK3; HECW1; MGAT5; KIRREL3;
TFAP2A	1	258	0.621118	0.467532	0.887392	1	1	1	TIAL1;
ARNT	6	403	3.72671	1.78109	0.123176	1	0.752606	1	SEC23IP; C15orf59; COMMD4; PARP6; PTEN; SCAPER;
BARX1	3	382	1.86335	0.941062	0.623283	1	0.97765	1	FAM204A; PRKCA; PKP4;
BSX	8	268	4.96894	3.56951	0.00192427	0.404096	0.404096	0.666826	TIAL1; NRG4; NEO1; HECW1; ST7L; ANKRD6; PRKCA; ACER3;
DMBX1	4	368	2.48447	1.3014	0.37114	1	0.85435	1	CPLX3; ARIH1; TSPAN9; ABCC9;
GSC	6	379	3.72671	1.89387	0.099452	1	0.713781	1	SEC23IP; SENP8; CPLX3; MYO9A; TSPAN9; ABCC9;
HNF4A	34	3015	21.118	1.34724	0.0399707	1	0.510918	0.843099	C15orf59; ETFA; NPTN; PAPSS2; ISL2; TIAL1; CSPG4; MPI; SLIT1; CCDC33; CSK; CYP1A1; TSPAN3; PRKG1; INPP5F; PRDX3; C15orf39; FAM204A; RAB11FIP2; ADPGK; MAN2C1; LOXL1; ST7L; PRKCA; NTN1; C2orf70; HSPD1; HSPE1; INVS; RABL6; PACSIN2; COLCA2; POU2AF1; KIRREL3;
HOXA3	8	573	4.96894	1.66954	0.108984	1	0.738276	1	BAG3; PKM; TIAL1; CACUL1; PRKG1; NEO1; VWC2; PRKCA;
HOXB3	6	335	3.72671	2.14261	0.0630314	1	0.661829	1	TIAL1; PTEN; FAM204A; NEO1; ST7L; PKP4;
HOXD8	7	811	4.34783	1.03233	0.52165	1	0.897922	1	CACUL1; PRKG1; PTEN; NEO1; HECW1; ZPBP; RDX;
ONECUT1	7	564	4.34783	1.48442	0.195007	1	0.785736	1	PRKG1; INPP5F; PTEN; HECW1; ABCC9; PKP4; ZC3H12C;
PAX7	7	467	4.34783	1.79274	0.098056	1	0.713781	1	NRL; TIAL1; ARID3B; PRKG1; RAB11FIP2; EIF3A; MGAT5;
POU4F3	6	687	3.72671	1.04481	0.516469	1	0.897922	1	ARID3B; PRKG1; PTEN; RAB11FIP2; NEO1; ST7L;
PRRX2	5	597	3.10559	1.00227	0.562698	1	0.926866	1	TIAL1; ARID3B; INPP5F; NEO1; PKP4;
VAX2	4	434	2.48447	1.1035	0.493978	1	0.897922	1	CACUL1; PTEN; FAM204A; EIF3A;
VSX2	6	595	3.72671	1.20636	0.380696	1	0.85435	1	A1CF; PTEN; FAM204A; STK17A; PRKCA; PKP4;
CUX1	2	350	1.24224	0.685871	0.794225	1	1	1	PKM; C11orf53;
CACD	8	514	4.96894	1.86118	0.0677785	1	0.668079	1	CSPG4; HECW1; TSPAN9; GOLT1B; ABLIM3; MGAT5; ZC3H12C; COLCA2;
HOXB13	3	526	1.86335	0.683438	0.820438	1	1	1	SGMS1; ZC3H12C; KIRREL3;
ZNF238	12	799	7.45342	1.79522	0.0365239	1	0.510918	0.843099	SGMS1; C15orf59; SLIT1; INPP5F; STRA6; DNAJA4; TSPAN9; IL31; NTN1; ABLIM3; CASP8; TSKU;
ZNF513	12	799	7.45342	1.79522	0.0365239	1	0.510918	0.843099	SGMS1; C15orf59; SLIT1; INPP5F; STRA6; DNAJA4; TSPAN9; IL31; NTN1; ABLIM3; CASP8; TSKU;
MYC	11	1086	6.8323	1.21082	0.30128	1	0.837362	1	NRL; DCAF11; SGMS1; SEMA7A; C15orf59; NPTN; CCDC33; CSK; PTEN; SCAPER; SYT3;
MYF5	23	1856	14.2857	1.48069	0.0363831	1	0.510918	0.843099	NRL; DCAF11; SGMS1; SEMA7A; PSTPIP1; PKM; UBE2Q2; SLIT1; ARID3B; CYP1A1; PRKG1; PARP6; RAB11FIP2; SCAPER; LRRC49; MLXIP; SYT3; ANKRD6; INVS; PACSIN2; ZC3H12C; ACER3; POU2AF1;
FOXD1	4	334	2.48447	1.43388	0.306638	1	0.837362	1	NRL; SIN3A; NEO1; HECW1;
POU6F1	6	655	3.72671	1.09586	0.470082	1	0.88869	1	A1CF; PTEN; RAB11FIP2; NEO1; HECW1; ST7L;
ASCL2	13	1499	8.07453	1.03657	0.489441	1	0.897922	1	SLIT1; C15orf39; EDC3; RAB11FIP2; SCAPER; CLK3; GRK5; DNAJA4; TSPAN9; CLIP1; ANKRD6; CCNB1; ZC3H12C;
BARHL1	5	509	3.10559	1.17554	0.422981	1	0.879466	1	PRKG1; PTEN; RAB11FIP2; RGS10; COA1;
ESRRA	6	917	3.72671	0.782757	0.785263	1	1	1	ETFA; CACUL1; PTPN9; RAB35; PKP4; ARHGAP20;
GBX1	1	199	0.621118	0.60614	0.813965	1	1	1	PRKG1;
GBX2	1	302	0.621118	0.399417	0.922638	1	1	1	FAM45A;
LHX4	5	392	3.10559	1.5264	0.232201	1	0.785736	1	ISL2; A1CF; FAM45A; PRKG1; TBC1D21;
POU3F4	6	366	3.72671	1.96114	0.087719	1	0.7085	1	A1CF; ARID3B; PTEN; NEO1; TSPAN9; PKP4;
TCF12	12	1099	7.45342	1.30517	0.210689	1	0.785736	1	SEMA7A; NEIL1; C15orf59; SLIT1; CCDC33; CLK3; MLXIP; SYT3; PRKCA; POU2AF1; LRRC32; KIRREL3;
ELF2	8	780	4.96894	1.22648	0.329912	1	0.85435	1	LINGO1; PAPSS2; TIAL1; CSK; PRKG1; RGS10; SIN3A; C2orf70;
ESR1	4	696	2.48447	0.688106	0.838865	1	1	1	C15orf59; ETFA; SCAMP2; CIB4;
FOS	16	1754	9.93789	1.09015	0.397849	1	0.85435	1	ATAD1; PSTPIP1; BAG3; TIAL1; MINPP1; ARID3B; STRA6; PTEN; PRDX3; CYP11A1; LOXL1; TSPAN9; PKP4; CASP8; PACSIN2; COLCA2;
FOSB	16	1754	9.93789	1.09015	0.397849	1	0.85435	1	ATAD1; PSTPIP1; BAG3; TIAL1; MINPP1; ARID3B; STRA6; PTEN; PRDX3; CYP11A1; LOXL1; TSPAN9; PKP4; CASP8; PACSIN2; COLCA2;
JUN	16	1754	9.93789	1.09015	0.397849	1	0.85435	1	ATAD1; PSTPIP1; BAG3; TIAL1; MINPP1; ARID3B; STRA6; PTEN; PRDX3; CYP11A1; LOXL1; TSPAN9; PKP4; CASP8; PACSIN2; COLCA2;
JUNB	16	1754	9.93789	1.09015	0.397849	1	0.85435	1	ATAD1; PSTPIP1; BAG3; TIAL1; MINPP1; ARID3B; STRA6; PTEN; PRDX3; CYP11A1; LOXL1; TSPAN9; PKP4; CASP8; PACSIN2; COLCA2;
JUND	16	1754	9.93789	1.09015	0.397849	1	0.85435	1	ATAD1; PSTPIP1; BAG3; TIAL1; MINPP1; ARID3B; STRA6; PTEN; PRDX3; CYP11A1; LOXL1; TSPAN9; PKP4; CASP8; PACSIN2; COLCA2;
NR6A1	8	769	4.96894	1.24402	0.316163	1	0.837362	1	COX5A; NPTN; FAM45A; PRKG1; PRDX3; DNAJA4; HSPD1; ALS2CR12;
RAB40B	11	806	6.8323	1.63145	0.0763519	1	0.668079	1	ATAD1; PAPSS2; INPP5F; PTEN; ADPGK; SCAMP5; ST7L; RAB35; RRAGD; ANKRD6; PACSIN2;
RARA	11	806	6.8323	1.63145	0.0763519	1	0.668079	1	ATAD1; PAPSS2; INPP5F; PTEN; ADPGK; SCAMP5; ST7L; RAB35; RRAGD; ANKRD6; PACSIN2;
SPI1	10	814	6.21118	1.46869	0.145791	1	0.785736	1	SGMS1; CCDC33; ARID3B; PRKG1; C15orf39; DKK1; RAB11FIP2; ST7L; CASP8; ZC3H12C;
BARX2	3	296	1.86335	1.21447	0.452045	1	0.88869	1	TIAL1; ARID3B; PTEN;
DBX2	4	408	2.48447	1.17382	0.446455	1	0.88869	1	ARID3B; RAB11FIP2; NEO1; KIRREL3;
EN1	2	466	1.24224	0.515143	0.904661	1	1	1	TIAL1; PRKG1;
FOXC1	3	301	1.86335	1.1943	0.462919	1	0.88869	1	TIAL1; UBL7; TMEM71;
HOXA5	12	916	7.45342	1.56592	0.0835194	1	0.701563	1	SLIT1; ARID3B; INPP5F; PTEN; DKK1; FAM204A; NEO1; TBC1D21; TSPAN9; PRKCA; PKP4; CCNB1;
HOXA7	4	527	2.48447	0.908766	0.647111	1	0.97765	1	PKM; ARID3B; MCMBP; NEO1;
HOXB6	1	123	0.621118	0.980636	0.64564	1	0.97765	1	RAB11FIP2;
HOXB7	2	388	1.24224	0.6187	0.839075	1	1	1	CACUL1; PTEN;
HOXC6	3	237	1.86335	1.51679	0.318995	1	0.837362	1	ARID3B; RAB11FIP2; RRAGD;
ISX	1	265	0.621118	0.455183	0.893914	1	1	1	CCDC33;
MNX1	1	311	0.621118	0.387859	0.928364	1	1	1	FAM204A;
MSX1	3	234	1.86335	1.53624	0.312128	1	0.837362	1	ARID3B; PTEN; FAM204A;
NKX1-1	1	146	0.621118	0.826162	0.708343	1	1	1	RRAGD;
PAX6	7	557	4.34783	1.50308	0.186982	1	0.785736	1	NRL; TIAL1; ARID3B; PRKG1; PTEN; NEO1; TSPAN9;
PBX1	11	741	6.8323	1.77456	0.0474177	1	0.553207	0.912883	NRL; DCAF11; SLIT1; ARID3B; FAM204A; RAB11FIP2; ST7L; ANKRD6; C2orf70; MGAT5; POU2AF1;
PKNOX1	1	95	0.621118	1.26963	0.55098	1	0.920194	1	SLIT1;
POU5F1	4	373	2.48447	1.28396	0.380637	1	0.85435	1	PRLHR; TIAL1; RRAGD; CCNB1;
PRRX1	3	389	1.86335	0.924129	0.635527	1	0.97765	1	TIAL1; ARID3B; PTEN;
REST	7	765	4.34783	1.0944	0.459981	1	0.88869	1	SGMS1; PRLHR; SLIT1; SCAMP5; SIN3A; COLCA2; KIRREL3;
SOX1	3	276	1.86335	1.30247	0.407738	1	0.8649	1	ISL2; RAB11FIP2; RRAGD;
TGIF1	5	1034	3.10559	0.578682	0.938175	1	1	1	BBS4; SLIT1; INPP5F; RAB11FIP2; HSPD1;
CRX	4	349	2.48447	1.37225	0.335027	1	0.85435	1	NRL; TIAL1; CACUL1; FAM204A;
ESR2	7	464	4.34783	1.80434	0.0955983	1	0.713781	1	NRL; PCK2; ETFA; PSMA4; TMEM202; SYT3; CIB4;
GLI1	4	148	2.48447	3.23579	0.0359614	1	0.510918	0.843099	NRL; DCAF11; RDX; TSKU;
HENMT1	12	1144	7.45342	1.25383	0.250881	1	0.785736	1	ARID3B; CRABP1; PARP6; RAB11FIP2; CLK3; LOXL1; TSPAN9; ABCC9; ANKRD6; C2orf70; RDX; ST3GAL4;
INSM1	3	487	1.86335	0.738168	0.777976	1	1	1	LINGO1; SLIT1; MGAT5;
NHLH1	12	1144	7.45342	1.25383	0.250881	1	0.785736	1	ARID3B; CRABP1; PARP6; RAB11FIP2; CLK3; LOXL1; TSPAN9; ABCC9; ANKRD6; C2orf70; RDX; ST3GAL4;
ZEB1	5	401	3.10559	1.49214	0.246132	1	0.785736	1	SLIT1; TMEM71; NTN1; SPOCK1; MGAT5;
ZFP161	12	1137	7.45342	1.26155	0.244444	1	0.785736	1	SENP8; PAPSS2; ISL2; PRKG1; MYO9A; PTEN; SIN3A; NEO1; RRAGD; PRKCA; TMEM98; ZC3H12C;
BACH2	8	628	4.96894	1.52333	0.157444	1	0.785736	1	PSTPIP1; BAG3; TIAL1; MCMBP; ARIH1; RRAGD; CASP8; ALS2CR12;
EBF1	2	205	1.24224	1.17098	0.513913	1	0.897922	1	PRKG1; INVS;
HOXA13	3	309	1.86335	1.16338	0.480121	1	0.892261	1	PSTPIP1; LRRC49; ALS2CR12;
MSX2	3	344	1.86335	1.04501	0.552116	1	0.920194	1	PRKG1; FAM204A; GOLT1B;
NOBOX	7	621	4.34783	1.34817	0.264928	1	0.787242	1	PRKG1; MCMBP; RAB11FIP2; VWC2; GOLT1B; RRAGD; MGAT5;
TFAP4	11	1280	6.8323	1.02731	0.50924	1	0.897922	1	PKM; ODF3L1; MPI; SCAMP5; GRK5; SIN3A; TSPAN9; MLXIP; CLIP1; SYT3; ANKRD6;
ATF3	5	800	3.10559	0.747944	0.804687	1	1	1	ODF3L1; PARP6; SCAMP5; YTHDC2; PKP4;
TAL1	12	1113	7.45342	1.28876	0.22288	1	0.785736	1	ATAD1; PSTPIP1; SCAMP2; SNX33; CRABP1; C15orf39; ST7L; ABCC9; SYT3; SPOCK1; CIB4; TSKU;
HOXA9	6	729	3.72671	0.984618	0.57488	1	0.928652	1	PRKG1; RAB11FIP2; EIF3A; GRK5; TBC1D21; TANC2;
NFE2	4	518	2.48447	0.924555	0.633678	1	0.97765	1	BAG3; TIAL1; ARID3B; COLCA2;
LMO2	7	610	4.34783	1.37249	0.250876	1	0.785736	1	PSTPIP1; UBE2Q2; SLIT1; SCAPER; GRK5; INVS; ZC3H12C;
GATA1	8	728	4.96894	1.31408	0.266163	1	0.787242	1	NRL; DCAF11; PKM; PRKG1; RAB11FIP2; PACSIN2; ST3GAL4; KIRREL3;
FOXD3	5	361	3.10559	1.65747	0.186222	1	0.785736	1	TIAL1; PTEN; NEO1; TSPAN9; NTN1;
ISL2	7	515	4.34783	1.62566	0.141988	1	0.785736	1	SEC23IP; TIAL1; ARID3B; PTEN; RAB11FIP2; EIF3A; NEO1;
ZNF143	4	618	2.48447	0.774953	0.764386	1	1	1	C15orf59; TIAL1; UBL7; PPCDC;
CDX2	1	253	0.621118	0.476772	0.882491	1	1	1	RAB11FIP2;
FOXK1	1	121	0.621118	0.996843	0.639592	1	0.97765	1	ST7L;
GFI1	7	552	4.34783	1.51669	0.181337	1	0.785736	1	NRL; PCK2; TIAL1; ARID3B; CACUL1; PRKG1; PKP4;
HOXB9	5	537	3.10559	1.11425	0.468836	1	0.88869	1	SLIT1; RAB11FIP2; EIF3A; LRRC49; PACSIN2;
PDX1	2	372	1.24224	0.64531	0.821379	1	1	1	PAPSS2; PACSIN2;
EOMES	1	291	0.621118	0.414515	0.915018	1	1	1	ARID3B;
TBX5	1	204	0.621118	0.591285	0.821703	1	1	1	SLIT1;
ATF6	1	195	0.621118	0.618573	0.807535	1	1	1	BAG3;
STRA13	7	574	4.34783	1.45856	0.206706	1	0.785736	1	SEC23IP; SENP8; NPTN; COMMD4; MYO9A; HSPD1; HSPE1;
ZIC1	9	548	5.59006	1.96364	0.04136	1	0.510918	0.843099	NRL; PCK2; DCAF11; CSPG4; CCDC33; SIN3A; TMEM98; PKP4; ALS2CR12;
DBX1	1	239	0.621118	0.504698	0.86761	1	1	1	RGS10;
FOXJ2	4	299	2.48447	1.60172	0.241829	1	0.785736	1	PRKG1; PTEN; DNAJA4; KIRREL3;
ELF1	6	585	3.72671	1.22698	0.365722	1	0.85435	1	TIAL1; FAM45A; C15orf39; RGS10; ST7L; CASP8;
E4F1	3	158	1.86335	2.27514	0.146847	1	0.785736	1	SGMS1; BAG3; ADPGK;
ITGAL	1	178	0.621118	0.677647	0.777651	1	1	1	LOXL1;
ESX1	3	266	1.86335	1.35144	0.385189	1	0.85435	1	NRL; TIAL1; PTEN;
DLX5	4	220	2.48447	2.17685	0.113619	1	0.739342	1	FAM204A; DDX11; PRKCA; ACER3;
HOXC10	2	81	1.24224	2.96336	0.147539	1	0.785736	1	TBC1D21; TANC2;
ATF4	5	315	3.10559	1.8995	0.125434	1	0.752606	1	C15orf59; ISL2; MINPP1; EIF3A; NEO1;
ELF3	4	437	2.48447	1.09592	0.499357	1	0.897922	1	ST7L; CASP8; INVS; ZC3H12C;
SPDEF	1	189	0.621118	0.638209	0.797473	1	1	1	HSPD1;
RBPJ	1	235	0.621118	0.513289	0.863024	1	1	1	PTEN;
CEBPD	2	113	1.24224	2.12425	0.244258	1	0.785736	1	RAB11FIP2; PACSIN2;
TP53	1	23	0.621118	5.24242	0.175918	1	0.785736	1	ATAD1;
ALX1	1	56	0.621118	2.15369	0.375936	1	0.85435	1	RAB11FIP2;

## Sheet: Clinical phenotype
Analysis: Clinical phenotype
Dataset name: Racing
Number of genes in the dataset: 161
Number of genes in the dataset (which are available in Clinical phenotype database) :15
Number of genes in background: 19230
Is analysis quantitative: No
						Corrected p-values
Clinical phenotype	No. of genes in the dataset	No.of genes in the background dataset	Percentage of genes	Fold enrichment	P-value (Hypergeometric test)	Bonferroni method	BH method	Q-value (Storey-Tibshirani method)
Abdomen	8	621	4.96894	1.5405	0.15077	1	1	1	PSTPIP1; BBS4; MPI; STRA6; PTEN; ABCC9; CASP8; INVS;
Abnormal fibrillar extracellular material in anterior segment tissues	1	1	0.621118	119.434	0.00837233	1	0.958871	1	LOXL1;
Abnormal isoelectric focusing of serum transferrin, type I pattern	1	1	0.621118	119.434	0.00837233	1	0.958871	1	MPI;
Abnormal lens suspensory ligament	1	1	0.621118	119.434	0.00837233	1	0.958871	1	LOXL1;
Abnormal ocular movements	1	3	0.621118	40.0757	0.0249086	1	1	1	PDHX;
Absence of corticomedullary differentiation (ultrasound)	1	1	0.621118	119.434	0.00837233	1	0.958871	1	INVS;
Acanthosis nigricans	1	8	0.621118	15.0597	0.06506	1	1	1	PTEN;
Acral keratoses	1	1	0.621118	119.434	0.00837233	1	0.958871	1	PTEN;
Adult onset	1	10	0.621118	12.0507	0.0806566	1	1	1	PTEN;
Agenesis of pulmonary vessels	1	1	0.621118	119.434	0.00837233	1	0.958871	1	STRA6;
Age of onset 17 to 68 years (mean 39)	1	1	0.621118	119.434	0.00837233	1	0.958871	1	HSPD1;
Airways	1	66	0.621118	1.82742	0.426412	1	1	1	CASP8;
Allelic to Bannayan-Riley-Ruvalcaba syndrome (	1	1	0.621118	119.434	0.00837233	1	0.958871	1	PTEN;
Allelic to Cowden disease (	1	1	0.621118	119.434	0.00837233	1	0.958871	1	PTEN;
Alveolar capillary dysplasia	1	1	0.621118	119.434	0.00837233	1	0.958871	1	STRA6;
Alveolar capillary dysplasia (rare)	1	1	0.621118	119.434	0.00837233	1	0.958871	1	STRA6;
Alveolar cell carcinoma	1	16	0.621118	7.53454	0.125912	1	1	1	CASP8;
Amblyopia	1	7	0.621118	17.208	0.0571634	1	1	1	PTEN;
Amniotic Fluid	1	68	0.621118	1.77368	0.43601	1	1	1	INVS;
Angioid streaks	1	1	0.621118	119.434	0.00837233	1	0.958871	1	PTEN;
Angiokeratoma	1	4	0.621118	30.0818	0.0330737	1	1	1	PTEN;
Anophthalmia, clinical	1	3	0.621118	40.0757	0.0249086	1	1	1	STRA6;
Anteverted nares	1	36	0.621118	3.34985	0.261364	1	1	1	ABCC9;
Anti-thrombin III deficiency	1	1	0.621118	119.434	0.00837233	1	0.958871	1	MPI;
Approximately 60% of BRRS patients have PTEN mutations	1	1	0.621118	119.434	0.00837233	1	0.958871	1	PTEN;
Approximately 80% of CS patients have PTEN mutations	1	1	0.621118	119.434	0.00837233	1	0.958871	1	PTEN;
Associated with mutation in the beta-1 catenin gene (CTNNB1,	1	9	0.621118	13.3882	0.0728909	1	1	1	CASP8;
Associated with mutation in the MET protooncogene (MET,	1	9	0.621118	13.3882	0.0728909	1	1	1	CASP8;
Associated with mutation in the p53 tumor protein gene (TP53,	1	9	0.621118	13.3882	0.0728909	1	1	1	CASP8;
Asthma	1	31	0.621118	3.88997	0.229595	1	1	1	CASP8;
Asymmetric pupil sizes	1	1	0.621118	119.434	0.00837233	1	0.958871	1	LOXL1;
Asymmetry of intraocular pressure	1	1	0.621118	119.434	0.00837233	1	0.958871	1	LOXL1;
Ataxia	2	130	1.24224	1.84649	0.296956	1	1	1	BBS4; PDHX;
Atrial septal defect	1	47	0.621118	2.56601	0.326745	1	1	1	STRA6;
Atypical cornea guttata	1	1	0.621118	119.434	0.00837233	1	0.958871	1	LOXL1;
Atypical nevi (>5mm with irregular edge and pigmentation)	1	1	0.621118	119.434	0.00837233	1	0.958871	1	PTEN;
Atypical nevi often present in non-sun exposed areas	1	1	0.621118	119.434	0.00837233	1	0.958871	1	PTEN;
Autism	1	5	0.621118	24.0774	0.0411708	1	1	1	PTEN;
Autosomal dominant	7	747	4.34783	1.12077	0.435385	1	1	1	PSTPIP1; MINPP1; PTEN; LOXL1; ABCC9; HSPD1; CASP8;
Autosomal dominant form	1	37	0.621118	3.25933	0.26756	1	1	1	PTEN;
Autosomal recessive	10	924	6.21118	1.29385	0.246756	1	1	1	PCK2; ETFA; BBS4; MPI; NR2E3; STRA6; PTEN; PDHX; CASP8; INVS;
Bands of growth arrest	1	1	0.621118	119.434	0.00837233	1	0.958871	1	ABCC9;
Basal ganglia lucencies	1	1	0.621118	119.434	0.00837233	1	0.958871	1	PDHX;
Behavioral Psychiatric Manifestations	1	200	0.621118	0.60311	0.815538	1	1	1	PTEN;
Beta family transforming growth factor resistance	1	3	0.621118	40.0757	0.0249086	1	1	1	PTEN;
Bicuspid aortic valve	1	8	0.621118	15.0597	0.06506	1	1	1	ABCC9;
Biparietal narrowing	1	1	0.621118	119.434	0.00837233	1	0.958871	1	PTEN;
'Birdlike' facies (uncommon)	1	1	0.621118	119.434	0.00837233	1	0.958871	1	PTEN;
Birth length greater than 97th percentile	1	2	0.621118	60.0139	0.016675	1	1	1	PTEN;
Birthweight > 90th percentile	1	1	0.621118	119.434	0.00837233	1	0.958871	1	ABCC9;
Birthweight greater than 4 kg	1	1	0.621118	119.434	0.00837233	1	0.958871	1	PTEN;
Bladder	1	90	0.621118	1.34016	0.531606	1	1	1	HSPD1;
Bleeding episodes	1	1	0.621118	119.434	0.00837233	1	0.958871	1	MPI;
Blepharophimosis (uncommon)	1	1	0.621118	119.434	0.00837233	1	0.958871	1	STRA6;
Brachydactyly	1	64	0.621118	1.88452	0.416652	1	1	1	BBS4;
Breast cancer	1	5	0.621118	24.0774	0.0411708	1	1	1	PTEN;
BREAST CANCER	1	23	0.621118	5.24242	0.175918	1	1	1	CASP8;
Breast carcinoma	1	23	0.621118	5.24242	0.175918	1	1	1	CASP8;
Breast fibroadenomas	1	1	0.621118	119.434	0.00837233	1	0.958871	1	PTEN;
Breasts	1	55	0.621118	2.19284	0.370652	1	1	1	PTEN;
Broad first metatarsal	1	1	0.621118	119.434	0.00837233	1	0.958871	1	ABCC9;
Broad, flared eyebrows	1	1	0.621118	119.434	0.00837233	1	0.958871	1	STRA6;
Broad forehead	1	19	0.621118	6.3455	0.147702	1	1	1	PTEN;
Broad nasal bridge (uncommon)	1	1	0.621118	119.434	0.00837233	1	0.958871	1	STRA6;
Cafe au lait spots	1	4	0.621118	30.0818	0.0330737	1	1	1	PTEN;
CANTU SYNDROME	1	1	0.621118	119.434	0.00837233	1	0.958871	1	ABCC9;
Cardiac	1	55	0.621118	2.19284	0.370652	1	1	1	PTEN;
Cardiomegaly	1	21	0.621118	5.74146	0.161928	1	1	1	ABCC9;
Cardiovascular	5	446	3.10559	1.34159	0.318509	1	1	1	BBS4; STRA6; PTEN; ABCC9; INVS;
CASPASE 8 DEFICIENCY	1	1	0.621118	119.434	0.00837233	1	0.958871	1	CASP8;
Cataract	1	36	0.621118	3.34985	0.261364	1	1	1	PTEN;
Cataract, nuclear	1	3	0.621118	40.0757	0.0249086	1	1	1	LOXL1;
Cataracts	1	49	0.621118	2.46129	0.337999	1	1	1	BBS4;
Central Nervous System	7	887	4.34783	0.943879	0.6172	1	1	1	BBS4; MPI; STRA6; PTEN; ABCC9; PDHX; HSPD1;
Cerebellar gangliocytoma manifesting as seizure and tremor	1	1	0.621118	119.434	0.00837233	1	0.958871	1	PTEN;
Cervical carcinoma	1	1	0.621118	119.434	0.00837233	1	0.958871	1	PTEN;
Chest	4	243	2.48447	1.97082	0.147261	1	1	1	STRA6; PTEN; ABCC9; PDHX;
Chronic tubulointerstitial nephritis	1	1	0.621118	119.434	0.00837233	1	0.958871	1	INVS;
Cirrhosis	1	25	0.621118	4.82319	0.189676	1	1	1	MPI;
Clinical manifestation of some forms of Bardet-Biedl syndrome requires recessive mutation in 1 of the 6 loci plus an additional mutation in a second locus	1	19	0.621118	6.3455	0.147702	1	1	1	BBS4;
Coarctation of aorta (rare)	1	1	0.621118	119.434	0.00837233	1	0.958871	1	STRA6;
Coarse facies	1	28	0.621118	4.3066	0.209886	1	1	1	ABCC9;
Coloboma, isolated (in some patients)	1	1	0.621118	119.434	0.00837233	1	0.958871	1	STRA6;
Colonic diverticula	1	1	0.621118	119.434	0.00837233	1	0.958871	1	PTEN;
Colonic hamartomatous polyps	1	1	0.621118	119.434	0.00837233	1	0.958871	1	PTEN;
Congenital, generalized hypertrichosis	1	1	0.621118	119.434	0.00837233	1	0.958871	1	ABCC9;
Congenital heart defect	1	21	0.621118	5.74146	0.161928	1	1	1	PTEN;
Congenital heart defects	1	22	0.621118	5.4806	0.168952	1	1	1	BBS4;
Congenital hypertrophy of left ventricle	1	1	0.621118	119.434	0.00837233	1	0.958871	1	ABCC9;
Corpus callosum agenesis, partial	1	1	0.621118	119.434	0.00837233	1	0.958871	1	PDHX;
Cortical microcysts	1	2	0.621118	60.0139	0.016675	1	1	1	INVS;
Coxa valga	1	22	0.621118	5.4806	0.168952	1	1	1	ABCC9;
Cryptorchidism	1	101	0.621118	1.19422	0.573179	1	1	1	STRA6;
Cuboid-shaped vertebral bodies (post-puberty)	1	1	0.621118	119.434	0.00837233	1	0.958871	1	ABCC9;
Decreased activity of the pyruvate dehydrogenase (PDH) complex	1	1	0.621118	119.434	0.00837233	1	0.958871	1	PDHX;
Decreased cellular caspase-8 levels	1	1	0.621118	119.434	0.00837233	1	0.958871	1	CASP8;
Decreased levels of component X protein of the PDH complex	1	1	0.621118	119.434	0.00837233	1	0.958871	1	PDHX;
Decreased vibratory sense in the lower limbs	1	9	0.621118	13.3882	0.0728909	1	1	1	HSPD1;
Defective B cell activation	1	1	0.621118	119.434	0.00837233	1	0.958871	1	CASP8;
Defective CD95-induced apoptosis of peripheral blood lymphocytes	1	1	0.621118	119.434	0.00837233	1	0.958871	1	CASP8;
Defective natural killer cell (NK) activation	1	1	0.621118	119.434	0.00837233	1	0.958871	1	CASP8;
Defective T cell activation	1	1	0.621118	119.434	0.00837233	1	0.958871	1	CASP8;
Delayed bone age	1	31	0.621118	3.88997	0.229595	1	1	1	ABCC9;
Dental crowding	1	29	0.621118	4.15815	0.216511	1	1	1	BBS4;
Depressed nasal bridge	1	38	0.621118	3.17359	0.273704	1	1	1	PTEN;
Developmental delay	3	141	1.86335	2.54943	0.114918	1	1	1	BBS4; PTEN; PDHX;
Diaphragm	1	20	0.621118	6.02838	0.154845	1	1	1	STRA6;
Diaphragmatic eventration	1	2	0.621118	60.0139	0.016675	1	1	1	STRA6;
Diaphragmatic hernia	1	10	0.621118	12.0507	0.0806566	1	1	1	STRA6;
Diarrhea	1	56	0.621118	2.15369	0.375936	1	1	1	MPI;
Diarrhea, chronic	1	2	0.621118	60.0139	0.016675	1	1	1	CASP8;
Digenic recessive	1	24	0.621118	5.02407	0.182826	1	1	1	BBS4;
Dilation of atrium	1	1	0.621118	119.434	0.00837233	1	0.958871	1	STRA6;
Dilation of ventricle	1	1	0.621118	119.434	0.00837233	1	0.958871	1	STRA6;
Dished out' midface	1	1	0.621118	119.434	0.00837233	1	0.958871	1	PTEN;
Downslanting palpebral fissures	1	57	0.621118	2.11591	0.381176	1	1	1	PTEN;
Dystonia	1	71	0.621118	1.69875	0.450107	1	1	1	PDHX;
Early lethality in most cases	1	1	0.621118	119.434	0.00837233	1	0.958871	1	STRA6;
Early onset prostate cancer	1	12	0.621118	10.044	0.0959946	1	1	1	PTEN;
Ears	2	442	1.24224	0.543114	0.887725	1	1	1	STRA6; PTEN;
Eczema	1	16	0.621118	7.53454	0.125912	1	1	1	CASP8;
Elevated serum creatinine	1	1	0.621118	119.434	0.00837233	1	0.958871	1	INVS;
Endocrine Features	2	155	1.24224	1.54868	0.373225	1	1	1	MPI; PTEN;
Enhanced insulin sensitivity	1	1	0.621118	119.434	0.00837233	1	0.958871	1	PTEN;
Enlarged, hyperechogenic kidneys (ultrasound)	1	1	0.621118	119.434	0.00837233	1	0.958871	1	INVS;
Enlarged medullary canal	1	1	0.621118	119.434	0.00837233	1	0.958871	1	ABCC9;
Enlarged penis	1	2	0.621118	60.0139	0.016675	1	1	1	PTEN;
Enlarged sella	1	1	0.621118	119.434	0.00837233	1	0.958871	1	ABCC9;
Enlarged testis	1	1	0.621118	119.434	0.00837233	1	0.958871	1	PTEN;
Epicanthal folds	2	61	1.24224	3.93479	0.0925924	1	1	1	ABCC9; PDHX;
Erlenmeyer flask femora	1	1	0.621118	119.434	0.00837233	1	0.958871	1	ABCC9;
Extensor plantar responses	1	65	0.621118	1.85553	0.421553	1	1	1	HSPD1;
External Features	2	180	1.24224	1.3336	0.446019	1	1	1	ABCC9; PDHX;
External Genitalia (Female)	1	50	0.621118	2.41208	0.343556	1	1	1	PTEN;
External Genitalia (Male)	2	151	1.24224	1.58971	0.361207	1	1	1	STRA6; PTEN;
Extinguished electroretinogram	1	1	0.621118	119.434	0.00837233	1	0.958871	1	NR2E3;
Eyes	7	826	4.34783	1.01358	0.541233	1	1	1	BBS4; NR2E3; STRA6; PTEN; LOXL1; ABCC9; PDHX;
Face	3	433	1.86335	0.830224	0.706121	1	1	1	STRA6; PTEN; ABCC9;
Facial dysmorphism	1	6	0.621118	20.0712	0.0492005	1	1	1	ETFA;
Facial trichilemmomas	1	1	0.621118	119.434	0.00837233	1	0.958871	1	PTEN;
Factor XI deficiency	1	3	0.621118	40.0757	0.0249086	1	1	1	MPI;
Failure to thrive	2	202	1.24224	1.18836	0.506055	1	1	1	MPI; CASP8;
Fatty kidneys	1	1	0.621118	119.434	0.00837233	1	0.958871	1	PCK2;
Fatty liver	1	1	0.621118	119.434	0.00837233	1	0.958871	1	PCK2;
Feet	2	345	1.24224	0.695811	0.787569	1	1	1	BBS4; ABCC9;
Fibrocystic breast disease	1	1	0.621118	119.434	0.00837233	1	0.958871	1	PTEN;
Flat, broad nasal bridge	1	4	0.621118	30.0818	0.0330737	1	1	1	ABCC9;
Follicular thyroid carcinoma	2	4	1.24224	59.8657	0.000413391	1	0.958871	1	MINPP1; PTEN;
Frequency increases with advancing age	1	6	0.621118	20.0712	0.0492005	1	1	1	PTEN;
Frontal bossing	1	58	0.621118	2.07943	0.386372	1	1	1	PTEN;
Frontal metopic ridge	1	1	0.621118	119.434	0.00837233	1	0.958871	1	PDHX;
Gastrointestinal	5	425	3.10559	1.40788	0.284266	1	1	1	PSTPIP1; BBS4; MPI; PTEN; CASP8;
Genetic heterogeneity	1	142	0.621118	0.849433	0.698291	1	1	1	CASP8;
Genetic heterogeneity, see SPG3A (	1	3	0.621118	40.0757	0.0249086	1	1	1	HSPD1;
Genitourinary	5	478	3.10559	1.25178	0.371524	1	1	1	BBS4; STRA6; PTEN; HSPD1; INVS;
GI	3	63	1.86335	5.70537	0.0158533	1	1	1	PCK2; ETFA; PTEN;
Gingival hypertrophy	1	4	0.621118	30.0818	0.0330737	1	1	1	ABCC9;
Glutaric aciduria	1	4	0.621118	30.0818	0.0330737	1	1	1	ETFA;
Goiter	1	8	0.621118	15.0597	0.06506	1	1	1	PTEN;
Gross motor delay	1	2	0.621118	60.0139	0.016675	1	1	1	PTEN;
Growth	6	609	3.72671	1.17863	0.401677	1	1	1	BBS4; MPI; STRA6; PTEN; ABCC9; CASP8;
GU	3	73	1.86335	4.92392	0.0233779	1	1	1	PCK2; ETFA; PTEN;
Gynecomastia in males	1	1	0.621118	119.434	0.00837233	1	0.958871	1	PTEN;
Hair	2	240	1.24224	1.00022	0.599365	1	1	1	STRA6; ABCC9;
Hamartomatous polyps	1	1	0.621118	119.434	0.00837233	1	0.958871	1	PTEN;
Hands	2	349	1.24224	0.687836	0.792908	1	1	1	BBS4; PTEN;
Hashimoto thyroiditis	1	2	0.621118	60.0139	0.016675	1	1	1	PTEN;
Head	3	345	1.86335	1.04199	0.554087	1	1	1	PTEN; ABCC9; PDHX;
Head and Neck	6	954	3.72671	0.752399	0.815692	1	1	1	BBS4; STRA6; PTEN; LOXL1; ABCC9; PDHX;
Hearing loss	1	41	0.621118	2.94143	0.29183	1	1	1	PTEN;
Heart	3	351	1.86335	1.02417	0.565805	1	1	1	BBS4; STRA6; ABCC9;
HEENT	1	28	0.621118	4.3066	0.209886	1	1	1	ETFA;
Height	3	290	1.86335	1.2396	0.438882	1	1	1	STRA6; PTEN; CASP8;
Hemangiomas	1	1	0.621118	119.434	0.00837233	1	0.958871	1	PTEN;
Hematology	2	229	1.24224	1.04826	0.573765	1	1	1	PSTPIP1; MPI;
Hepatic failure	1	20	0.621118	6.02838	0.154845	1	1	1	MPI;
Hepatic fibrosis	2	27	1.24224	8.88788	0.0213194	1	1	1	BBS4; MPI;
HEPATOCELLULAR CARCINOMA	1	9	0.621118	13.3882	0.0728909	1	1	1	CASP8;
Hepatocellular carcinoma	1	18	0.621118	6.69783	0.140499	1	1	1	CASP8;
Hepatomegaly	1	130	0.621118	0.927836	0.666023	1	1	1	MPI;
Herpes simplex virus infection, mucocutaneous	1	1	0.621118	119.434	0.00837233	1	0.958871	1	CASP8;
High-arched palate	1	86	0.621118	1.40249	0.515511	1	1	1	PTEN;
High arched palate	1	32	0.621118	3.76845	0.236056	1	1	1	BBS4;
High palate	1	9	0.621118	13.3882	0.0728909	1	1	1	PDHX;
High recurrence rate	1	6	0.621118	20.0712	0.0492005	1	1	1	PTEN;
Hirschsprung disease (	1	19	0.621118	6.3455	0.147702	1	1	1	BBS4;
Horseshoe kidney	1	13	0.621118	9.27194	0.103568	1	1	1	STRA6;
Hydrocele	1	3	0.621118	40.0757	0.0249086	1	1	1	PTEN;
Hydrocephalus	1	49	0.621118	2.46129	0.337999	1	1	1	PTEN;
Hydronephrosis	1	38	0.621118	3.17359	0.273704	1	1	1	STRA6;
Hyperinsulinemic hypoglycemia	1	5	0.621118	24.0774	0.0411708	1	1	1	MPI;
Hyperkalemia	1	8	0.621118	15.0597	0.06506	1	1	1	INVS;
Hyperkalemic metabolic acidosis	1	1	0.621118	119.434	0.00837233	1	0.958871	1	INVS;
Hyperreflexia	1	122	0.621118	0.988673	0.642628	1	1	1	HSPD1;
Hypertelorism	1	121	0.621118	0.996843	0.639592	1	1	1	PDHX;
Hypertension	2	57	1.24224	4.21087	0.0824882	1	1	1	BBS4; INVS;
Hyperthyroidism	1	4	0.621118	30.0818	0.0330737	1	1	1	PTEN;
Hypoalbuminemia	1	10	0.621118	12.0507	0.0806566	1	1	1	MPI;
Hypodontia	1	51	0.621118	2.36479	0.349066	1	1	1	BBS4;
Hypoglycemia	2	55	1.24224	4.36396	0.0775734	1	1	1	PCK2; PTEN;
Hypoglycemic coma	1	3	0.621118	40.0757	0.0249086	1	1	1	ETFA;
Hypogonadism (major)	1	19	0.621118	6.3455	0.147702	1	1	1	BBS4;
Hypoplasia or absence of optic nerve	1	1	0.621118	119.434	0.00837233	1	0.958871	1	STRA6;
Hypoplastic, bicornuate uterus	1	1	0.621118	119.434	0.00837233	1	0.958871	1	STRA6;
Hypoplastic ishchiopubic rami	1	1	0.621118	119.434	0.00837233	1	0.958871	1	ABCC9;
Hypoplastic kidney	1	3	0.621118	40.0757	0.0249086	1	1	1	STRA6;
Hypoplastic left atrium	1	1	0.621118	119.434	0.00837233	1	0.958871	1	STRA6;
Hypoplastic mandible (uncommon)	1	1	0.621118	119.434	0.00837233	1	0.958871	1	PTEN;
Hypoplastic maxilla (uncommon)	1	1	0.621118	119.434	0.00837233	1	0.958871	1	PTEN;
Hypoplastic renal arteries (rare)	1	1	0.621118	119.434	0.00837233	1	0.958871	1	STRA6;
Hypoplastic spleen	1	2	0.621118	60.0139	0.016675	1	1	1	STRA6;
Hypothyroidism	1	17	0.621118	7.09159	0.133236	1	1	1	PTEN;
Hypotonia	3	233	1.86335	1.54283	0.30984	1	1	1	MPI; STRA6; PTEN;
Hypotonia, neonatal	1	19	0.621118	6.3455	0.147702	1	1	1	PDHX;
Ileal hamartomatous polyps	1	1	0.621118	119.434	0.00837233	1	0.958871	1	PTEN;
Immunology	1	148	0.621118	0.814999	0.713244	1	1	1	CASP8;
Incomplete penetrance	1	36	0.621118	3.34985	0.261364	1	1	1	PTEN;
Increased serum alanine	1	2	0.621118	60.0139	0.016675	1	1	1	PDHX;
Increased serum pyruvate	1	2	0.621118	60.0139	0.016675	1	1	1	PDHX;
Inguinal hernia	1	44	0.621118	2.74092	0.309507	1	1	1	STRA6;
Intention tremor	1	10	0.621118	12.0507	0.0806566	1	1	1	PTEN;
Intermittent sterile, pauciarticular, peripheral erosive arthritis (elbow, knee, ankle)	1	1	0.621118	119.434	0.00837233	1	0.958871	1	PSTPIP1;
Internal Genitalia (Female)	2	96	1.24224	2.50038	0.192068	1	1	1	STRA6; PTEN;
Internal Genitalia (Male)	2	148	1.24224	1.62193	0.352139	1	1	1	BBS4; STRA6;
Intracranial developmental venous anomalies	1	1	0.621118	119.434	0.00837233	1	0.958871	1	PTEN;
Intraocular melanoma	1	1	0.621118	119.434	0.00837233	1	0.958871	1	PTEN;
Intrauterine growth retardation (IUGR)	1	4	0.621118	30.0818	0.0330737	1	1	1	STRA6;
Intussusception	1	2	0.621118	60.0139	0.016675	1	1	1	PTEN;
Iris hypoperfusion resulting from degenerated stromal vessels	1	1	0.621118	119.434	0.00837233	1	0.958871	1	LOXL1;
Iris rigidity	1	1	0.621118	119.434	0.00837233	1	0.958871	1	LOXL1;
Irritable bowel syndrome	1	1	0.621118	119.434	0.00837233	1	0.958871	1	PSTPIP1;
Jaundice	1	28	0.621118	4.3066	0.209886	1	1	1	ETFA;
Joint hyperextensibility	1	7	0.621118	17.208	0.0571634	1	1	1	PTEN;
Kidneys	3	276	1.86335	1.30247	0.407738	1	1	1	BBS4; STRA6; INVS;
Kyphosis	1	56	0.621118	2.15369	0.375936	1	1	1	PTEN;
Lab	5	266	3.10559	2.2494	0.0732618	1	1	1	PCK2; ETFA; MINPP1; NR2E3; PTEN;
Laboratory Abnormalities	5	712	3.10559	0.840385	0.715831	1	1	1	MPI; PTEN; PDHX; CASP8; INVS;
Lacticacidemia	1	1	0.621118	119.434	0.00837233	1	0.958871	1	PDHX;
Lactic acidosis	1	58	0.621118	2.07943	0.386372	1	1	1	PDHX;
Large, low-set ears (uncommon)	1	1	0.621118	119.434	0.00837233	1	0.958871	1	STRA6;
Learning disabilities (major)	1	19	0.621118	6.3455	0.147702	1	1	1	BBS4;
Left ventricular hypertrophy	1	26	0.621118	4.63775	0.196469	1	1	1	BBS4;
Leiomyomas	1	1	0.621118	119.434	0.00837233	1	0.958871	1	PTEN;
Lens pseudoexfoliation	1	1	0.621118	119.434	0.00837233	1	0.958871	1	LOXL1;
Lens subluxation	1	1	0.621118	119.434	0.00837233	1	0.958871	1	LOXL1;
Lhermitte-Duclos disease	1	1	0.621118	119.434	0.00837233	1	0.958871	1	PTEN;
Limbs	2	339	1.24224	0.708125	0.779334	1	1	1	PTEN; ABCC9;
Lipid storage myopathy	1	3	0.621118	40.0757	0.0249086	1	1	1	PTEN;
Lipoma	1	1	0.621118	119.434	0.00837233	1	0.958871	1	PTEN;
Liquefied vitreous body	1	1	0.621118	119.434	0.00837233	1	0.958871	1	NR2E3;
Liver	3	256	1.86335	1.40422	0.362454	1	1	1	BBS4; MPI; CASP8;
Long, curly eyelashes	1	1	0.621118	119.434	0.00837233	1	0.958871	1	ABCC9;
Long philtrum	2	54	1.24224	4.44476	0.0751522	1	1	1	PTEN; ABCC9;
Loss of heterozygosity (LOH) on chromosome 3p	2	4	1.24224	59.8657	0.000413391	1	0.958871	1	MINPP1; PTEN;
Lower limb spasticity	1	17	0.621118	7.09159	0.133236	1	1	1	HSPD1;
Lower limb weakness	1	16	0.621118	7.53454	0.125912	1	1	1	HSPD1;
Lung	3	171	1.86335	2.10219	0.172983	1	1	1	STRA6; CASP8; INVS;
LUNG CANCER	1	16	0.621118	7.53454	0.125912	1	1	1	CASP8;
Lymphadenopathy	1	13	0.621118	9.27194	0.103568	1	1	1	CASP8;
Lymphangiectasia	1	2	0.621118	60.0139	0.016675	1	1	1	MPI;
Lymphedema	1	3	0.621118	40.0757	0.0249086	1	1	1	ABCC9;
Macrocephaly	2	60	1.24224	4.00036	0.0900334	1	1	1	PTEN; ABCC9;
MACROCEPHALY/AUTISM SYNDROME	1	1	0.621118	119.434	0.00837233	1	0.958871	1	PTEN;
Macrocephaly, postnatal	1	1	0.621118	119.434	0.00837233	1	0.958871	1	PTEN;
Macrodactyly	1	1	0.621118	119.434	0.00837233	1	0.958871	1	PTEN;
Malignant melanoma	1	2	0.621118	60.0139	0.016675	1	1	1	PTEN;
Malrotation of kidney	1	1	0.621118	119.434	0.00837233	1	0.958871	1	STRA6;
Melanin dispersion in iris	1	1	0.621118	119.434	0.00837233	1	0.958871	1	LOXL1;
Meningioma	1	7	0.621118	17.208	0.0571634	1	1	1	PTEN;
MENINGIOMA, FAMILIAL, SUSCEPTIBILITY TO	1	6	0.621118	20.0712	0.0492005	1	1	1	PTEN;
Mental retardation	1	200	0.621118	0.60311	0.815538	1	1	1	PDHX;
Mental retardation, mild to moderate (in 12%)	1	1	0.621118	119.434	0.00837233	1	0.958871	1	PTEN;
Mental retardation, profound	1	12	0.621118	10.044	0.0959946	1	1	1	STRA6;
Metabolic	2	55	1.24224	4.36396	0.0775734	1	1	1	PCK2; ETFA;
Metabolic acidosis	1	30	0.621118	4.01959	0.223081	1	1	1	PDHX;
Metabolic Features	2	195	1.24224	1.23102	0.487405	1	1	1	PDHX; INVS;
Microcephaly	1	129	0.621118	0.935028	0.663184	1	1	1	PDHX;
Micrognathia (uncommon)	1	1	0.621118	119.434	0.00837233	1	0.958871	1	STRA6;
Micronodular cirrhosis	1	10	0.621118	12.0507	0.0806566	1	1	1	CASP8;
Microphthalmia, bilateral (isolated feature in some patients)	1	1	0.621118	119.434	0.00837233	1	0.958871	1	STRA6;
Microstomia	1	12	0.621118	10.044	0.0959946	1	1	1	PTEN;
Mild mental retardation (some)	1	1	0.621118	119.434	0.00837233	1	0.958871	1	ABCC9;
Mild-to-severe mental retardation	1	1	0.621118	119.434	0.00837233	1	0.958871	1	PTEN;
Misc	2	219	1.24224	1.09612	0.549487	1	1	1	ETFA; PTEN;
Miscellaneous	10	1228	6.21118	0.973551	0.582519	1	1	1	PSTPIP1; BBS4; MPI; STRA6; PTEN; LOXL1; PDHX; HSPD1; CASP8; INVS;
Mitochondrial phosphoenolpyruvate carboxykinase deficiency	1	1	0.621118	119.434	0.00837233	1	0.958871	1	PCK2;
More common in women	1	7	0.621118	17.208	0.0571634	1	1	1	PTEN;
Moth-eaten' pattern of peripupillary atrophy	1	1	0.621118	119.434	0.00837233	1	0.958871	1	LOXL1;
Mouth	4	417	2.48447	1.14848	0.463074	1	1	1	BBS4; PTEN; ABCC9; PDHX;
Mucosal neuromas	1	1	0.621118	119.434	0.00837233	1	0.958871	1	PTEN;
Multiple facial papules	1	1	0.621118	119.434	0.00837233	1	0.958871	1	PTEN;
Multiple skin tags	1	1	0.621118	119.434	0.00837233	1	0.958871	1	PTEN;
Muscle, Soft Tissue	2	341	1.24224	0.703972	0.78211	1	1	1	PTEN; ABCC9;
Myopia	1	47	0.621118	2.56601	0.326745	1	1	1	PTEN;
Narrow obturator foramen	1	1	0.621118	119.434	0.00837233	1	0.958871	1	ABCC9;
Narrow shoulders	1	6	0.621118	20.0712	0.0492005	1	1	1	ABCC9;
Narrow thorax	1	11	0.621118	10.9562	0.0883577	1	1	1	ABCC9;
Nausea	1	10	0.621118	12.0507	0.0806566	1	1	1	ETFA;
Neck	1	130	0.621118	0.927836	0.666023	1	1	1	ABCC9;
Neonatal acidosis	1	3	0.621118	40.0757	0.0249086	1	1	1	ETFA;
Neonatal death secondary to pulmonary insufficiency	1	1	0.621118	119.434	0.00837233	1	0.958871	1	INVS;
Neoplasia	2	151	1.24224	1.58971	0.361207	1	1	1	PTEN; CASP8;
Nephrogenic diabetes insipidus	1	19	0.621118	6.3455	0.147702	1	1	1	BBS4;
Neuro	2	132	1.24224	1.81851	0.303137	1	1	1	ETFA; PTEN;
Neurologic	7	930	4.34783	0.900237	0.666498	1	1	1	BBS4; MPI; STRA6; PTEN; ABCC9; PDHX; HSPD1;
No response to pneumococcal vaccination	1	1	0.621118	119.434	0.00837233	1	0.958871	1	CASP8;
Normal adult height	1	2	0.621118	60.0139	0.016675	1	1	1	PTEN;
Normocytic pancytopenia following sulfa use	1	1	0.621118	119.434	0.00837233	1	0.958871	1	PSTPIP1;
Nose	3	314	1.86335	1.14485	0.490743	1	1	1	STRA6; PTEN; ABCC9;
Numerous nevi	1	1	0.621118	119.434	0.00837233	1	0.958871	1	PTEN;
Obesity	1	43	0.621118	2.80465	0.303664	1	1	1	BBS4;
Obesity, increased risk of	1	1	0.621118	119.434	0.00837233	1	0.958871	1	PTEN;
Obesity (in some patients)	1	1	0.621118	119.434	0.00837233	1	0.958871	1	PTEN;
Often integrated HBV sequences in hepatocellular carcinomas	1	9	0.621118	13.3882	0.0728909	1	1	1	CASP8;
Oligohydramnios	1	12	0.621118	10.044	0.0959946	1	1	1	INVS;
Oncology	2	80	1.24224	3.0004	0.14465	1	1	1	MINPP1; PTEN;
Only upward-growing eyebrows (uncommon)	1	1	0.621118	119.434	0.00837233	1	0.958871	1	STRA6;
Onset at birth or in early childhood	1	2	0.621118	60.0139	0.016675	1	1	1	PDHX;
Onset in childhood	1	26	0.621118	4.63775	0.196469	1	1	1	PTEN;
Onset of acne in adolescence, persists into adulthood	1	1	0.621118	119.434	0.00837233	1	0.958871	1	PSTPIP1;
Onset of arthritis in early childhood	1	1	0.621118	119.434	0.00837233	1	0.958871	1	PSTPIP1;
Onset of symptoms 2-12 months	1	1	0.621118	119.434	0.00837233	1	0.958871	1	MPI;
Open-angle glaucoma due to pupillary and ciliary block	1	1	0.621118	119.434	0.00837233	1	0.958871	1	LOXL1;
Optic atrophy	1	82	0.621118	1.47089	0.498867	1	1	1	PDHX;
Oral papillomas	1	1	0.621118	119.434	0.00837233	1	0.958871	1	PTEN;
Osteoporosis	1	42	0.621118	2.87141	0.297772	1	1	1	ABCC9;
Other	5	384	3.10559	1.5582	0.22002	1	1	1	BBS4; MPI; STRA6; PTEN; CASP8;
Ovarian carcinoma	1	4	0.621118	30.0818	0.0330737	1	1	1	PTEN;
Ovarian cysts	1	3	0.621118	40.0757	0.0249086	1	1	1	PTEN;
Ovoid-shaped vertebral bodies (childhood)	1	1	0.621118	119.434	0.00837233	1	0.958871	1	ABCC9;
Palmoplantar keratoses	1	1	0.621118	119.434	0.00837233	1	0.958871	1	PTEN;
PAPA syndrome is an acronym for Pyogenic sterile Arthritis, Pyoderma gangrenosum, Acne	1	1	0.621118	119.434	0.00837233	1	0.958871	1	PSTPIP1;
Patent ductus arteriosus	2	41	1.24224	5.85373	0.046172	1	1	1	STRA6; ABCC9;
Patients may or may not have dysmorphic features	1	1	0.621118	119.434	0.00837233	1	0.958871	1	PDHX;
Pectus excavatum	1	44	0.621118	2.74092	0.309507	1	1	1	PTEN;
Pectus excavatum (1 patient)	1	1	0.621118	119.434	0.00837233	1	0.958871	1	PDHX;
Pelvic kidney	1	1	0.621118	119.434	0.00837233	1	0.958871	1	STRA6;
Pelvis	1	153	0.621118	0.788367	0.72514	1	1	1	ABCC9;
Pericardial effusions	1	2	0.621118	60.0139	0.016675	1	1	1	ABCC9;
Phacodonesis	1	1	0.621118	119.434	0.00837233	1	0.958871	1	LOXL1;
Phenotypic similarities to Leigh syndrome (	1	1	0.621118	119.434	0.00837233	1	0.958871	1	PDHX;
PHOSPHOENOLPYRUVATE CARBOXYKINASE DEFICIENCY, MITOCHONDRIAL	1	1	0.621118	119.434	0.00837233	1	0.958871	1	PCK2;
Phosphomannose isomerase deficiency in leukocytes, fibroblasts, or liver	1	1	0.621118	119.434	0.00837233	1	0.958871	1	MPI;
Pigment deposition in the trabecular meshwork	1	1	0.621118	119.434	0.00837233	1	0.958871	1	LOXL1;
Platyspondyly	1	26	0.621118	4.63775	0.196469	1	1	1	ABCC9;
Pneumonia	1	15	0.621118	8.03651	0.118526	1	1	1	CASP8;
Polydactyly (major)	1	19	0.621118	6.3455	0.147702	1	1	1	BBS4;
Poor coordination	1	22	0.621118	5.4806	0.168952	1	1	1	BBS4;
Poor fine and gross motor coordination	1	1	0.621118	119.434	0.00837233	1	0.958871	1	PDHX;
Poor mydriasis	1	1	0.621118	119.434	0.00837233	1	0.958871	1	LOXL1;
Postnatal growth deceleration	1	1	0.621118	119.434	0.00837233	1	0.958871	1	PTEN;
Prenatal Manifestations	1	115	0.621118	1.04885	0.620826	1	1	1	INVS;
Presence of 4 major features or 3 major and 2 minor features establishes the diagnosis	1	19	0.621118	6.3455	0.147702	1	1	1	BBS4;
Prevalence rates average 10-20% of the general population over age 60	1	1	0.621118	119.434	0.00837233	1	0.958871	1	LOXL1;
Primary liver cancer	1	9	0.621118	13.3882	0.0728909	1	1	1	CASP8;
Progressive disorder	1	69	0.621118	1.74798	0.440748	1	1	1	HSPD1;
Progressive macrocephaly	1	2	0.621118	60.0139	0.016675	1	1	1	PTEN;
Prominent corneal nerves	1	1	0.621118	119.434	0.00837233	1	0.958871	1	PTEN;
Prominent forehead	1	36	0.621118	3.34985	0.261364	1	1	1	ABCC9;
Prominent Schwalbe lines	1	1	0.621118	119.434	0.00837233	1	0.958871	1	PTEN;
PROSTATE CANCER	1	12	0.621118	10.044	0.0959946	1	1	1	PTEN;
Protein-losing enteropathy	1	2	0.621118	60.0139	0.016675	1	1	1	MPI;
Pseudopapilledema	1	1	0.621118	119.434	0.00837233	1	0.958871	1	PTEN;
Pseudouveitis due to breakdown of blood-aqueous barrier	1	1	0.621118	119.434	0.00837233	1	0.958871	1	LOXL1;
Psychomotor delay	1	7	0.621118	17.208	0.0571634	1	1	1	PDHX;
Psychomotor delay, mild to moderate	1	1	0.621118	119.434	0.00837233	1	0.958871	1	PTEN;
Pulmonary agenesis, usually bilateral	1	1	0.621118	119.434	0.00837233	1	0.958871	1	STRA6;
Pulmonary artery atresia (rare)	1	2	0.621118	60.0139	0.016675	1	1	1	STRA6;
Pulmonary hypoplasia	1	18	0.621118	6.69783	0.140499	1	1	1	INVS;
Pulmonary hypoplasia, usually bilateral	1	1	0.621118	119.434	0.00837233	1	0.958871	1	STRA6;
Pulmonic valve stenosis (rare)	1	1	0.621118	119.434	0.00837233	1	0.958871	1	STRA6;
Pyoderma gangrenosum	1	1	0.621118	119.434	0.00837233	1	0.958871	1	PSTPIP1;
PYOGENIC STERILE ARTHRITIS, PYODERMA GANGRENOSUM, AND ACNE	1	1	0.621118	119.434	0.00837233	1	0.958871	1	PSTPIP1;
Pyramidal hypertonia	1	1	0.621118	119.434	0.00837233	1	0.958871	1	PDHX;
Pyramidal signs	1	23	0.621118	5.24242	0.175918	1	1	1	HSPD1;
Radial dysplasia	1	1	0.621118	119.434	0.00837233	1	0.958871	1	PTEN;
Reactive airway disease	1	1	0.621118	119.434	0.00837233	1	0.958871	1	CASP8;
Rectal bleeding	1	1	0.621118	119.434	0.00837233	1	0.958871	1	PTEN;
Recurrent sinopulmonary infections	1	3	0.621118	40.0757	0.0249086	1	1	1	CASP8;
Regional, racial, and ethnic clustering has been noted	1	1	0.621118	119.434	0.00837233	1	0.958871	1	LOXL1;
Renal anomalies (major)	1	19	0.621118	6.3455	0.147702	1	1	1	BBS4;
Renal failure by age 3	1	1	0.621118	119.434	0.00837233	1	0.958871	1	INVS;
Renal hypoplasia	1	4	0.621118	30.0818	0.0330737	1	1	1	PTEN;
Resp	1	22	0.621118	5.4806	0.168952	1	1	1	PTEN;
Respiratory	4	360	2.48447	1.33032	0.355931	1	1	1	ETFA; STRA6; CASP8; INVS;
Respiratory distress	1	13	0.621118	9.27194	0.103568	1	1	1	ETFA;
Respiratory failure	2	42	1.24224	5.71439	0.0482203	1	1	1	PTEN; INVS;
Respiratory insufficiency	1	35	0.621118	3.44553	0.255116	1	1	1	STRA6;
Responsive to oral mannose therapy	1	1	0.621118	119.434	0.00837233	1	0.958871	1	MPI;
Retinal vein occlusion	1	1	0.621118	119.434	0.00837233	1	0.958871	1	LOXL1;
Retinitis pigmentosa	1	39	0.621118	3.09223	0.279796	1	1	1	BBS4;
Ribs, Sternum, Clavicles and Scapulae	2	162	1.24224	1.48177	0.394034	1	1	1	PTEN; ABCC9;
Right aortic arch (rare)	1	1	0.621118	119.434	0.00837233	1	0.958871	1	STRA6;
Rod-cone dystrophy, onset by end of 2nd decade (major)	1	19	0.621118	6.3455	0.147702	1	1	1	BBS4;
Scoliosis	1	118	0.621118	1.02218	0.630327	1	1	1	PTEN;
Scrotal tongue	1	3	0.621118	40.0757	0.0249086	1	1	1	PTEN;
Seizure	1	5	0.621118	24.0774	0.0411708	1	1	1	PTEN;
Seizures	2	275	1.24224	0.87292	0.67311	1	1	1	PTEN; PDHX;
Selective proximal tubular damage	1	3	0.621118	40.0757	0.0249086	1	1	1	ETFA;
Severe cystic acne	1	1	0.621118	119.434	0.00837233	1	0.958871	1	PSTPIP1;
Severe phenotype	1	3	0.621118	40.0757	0.0249086	1	1	1	HSPD1;
Short, broad first toe	1	1	0.621118	119.434	0.00837233	1	0.958871	1	ABCC9;
Short neck	1	63	0.621118	1.91443	0.411711	1	1	1	ABCC9;
Short nose	1	26	0.621118	4.63775	0.196469	1	1	1	PTEN;
Short stature	2	172	1.24224	1.39563	0.423206	1	1	1	STRA6; CASP8;
Single ventricle	1	2	0.621118	60.0139	0.016675	1	1	1	STRA6;
Situs inversus (in some patients)	1	1	0.621118	119.434	0.00837233	1	0.958871	1	INVS;
Skel	1	46	0.621118	2.62178	0.321047	1	1	1	PTEN;
Skeletal	4	634	2.48447	0.755396	0.781537	1	1	1	PSTPIP1; BBS4; PTEN; ABCC9;
Skeletal abnormalities are variable	1	1	0.621118	119.434	0.00837233	1	0.958871	1	PTEN;
Skin	5	539	3.10559	1.11011	0.472074	1	1	1	ETFA; PSTPIP1; PTEN; ABCC9; CASP8;
Skin lesions are fully penetrant by second decade	1	1	0.621118	119.434	0.00837233	1	0.958871	1	PTEN;
Skin, Nails, Hair	5	554	3.10559	1.08006	0.496151	1	1	1	PSTPIP1; STRA6; PTEN; ABCC9; CASP8;
Skull	1	148	0.621118	0.814999	0.713244	1	1	1	ABCC9;
Small tooth roots	1	19	0.621118	6.3455	0.147702	1	1	1	BBS4;
Small ventricle	1	1	0.621118	119.434	0.00837233	1	0.958871	1	STRA6;
Somatic mutation	1	30	0.621118	4.01959	0.223081	1	1	1	CASP8;
Spastic gait	1	18	0.621118	6.69783	0.140499	1	1	1	HSPD1;
Spastic paraplegia	1	6	0.621118	20.0712	0.0492005	1	1	1	PDHX;
Spastic quadriplegia	1	12	0.621118	10.044	0.0959946	1	1	1	PDHX;
Speech delay	2	41	1.24224	5.85373	0.046172	1	1	1	BBS4; PTEN;
Speech disorder	1	21	0.621118	5.74146	0.161928	1	1	1	BBS4;
Sphincter disturbances	1	13	0.621118	9.27194	0.103568	1	1	1	HSPD1;
Spine	2	286	1.24224	0.839347	0.693911	1	1	1	PTEN; ABCC9;
Spleen	2	109	1.24224	2.2022	0.231887	1	1	1	STRA6; CASP8;
Splenomegaly	1	84	0.621118	1.43588	0.507259	1	1	1	CASP8;
Square outline	1	1	0.621118	119.434	0.00837233	1	0.958871	1	PTEN;
Sterile abscesses at site of parenteral injection	1	1	0.621118	119.434	0.00837233	1	0.958871	1	PSTPIP1;
Stillbirth/neonatal death	1	1	0.621118	119.434	0.00837233	1	0.958871	1	PTEN;
Strabismus	2	128	1.24224	1.87533	0.290767	1	1	1	BBS4; PTEN;
Subacute progressive viral hepatitis	1	9	0.621118	13.3882	0.0728909	1	1	1	CASP8;
Subcutaneous lipomas	1	2	0.621118	60.0139	0.016675	1	1	1	PTEN;
Subependymal cysts	1	3	0.621118	40.0757	0.0249086	1	1	1	PDHX;
Supernumerary nipples	1	5	0.621118	24.0774	0.0411708	1	1	1	PTEN;
Susceptibility conferred by mutation in the homolog of the S. pombe checkpoint kinase 2 gene (CHEK2,	1	23	0.621118	5.24242	0.175918	1	1	1	CASP8;
Susceptibility conferred by mutation in the lysyl oxidase-like 1 gene (LOXL1,	1	1	0.621118	119.434	0.00837233	1	0.958871	1	LOXL1;
Sweaty feet odor	1	3	0.621118	40.0757	0.0249086	1	1	1	ETFA;
Symptoms usually occur in adults	1	1	0.621118	119.434	0.00837233	1	0.958871	1	PTEN;
Synovial tissue biopsy shows polymorphonuclear infiltrate without presence of immunoglobulin or complement deposits	1	1	0.621118	119.434	0.00837233	1	0.958871	1	PSTPIP1;
Tabular atrophy	1	1	0.621118	119.434	0.00837233	1	0.958871	1	INVS;
Tan macules on glans penis and penile shaft	1	1	0.621118	119.434	0.00837233	1	0.958871	1	PTEN;
Teeth	1	228	0.621118	0.529047	0.854617	1	1	1	BBS4;
T-E fistula	1	1	0.621118	119.434	0.00837233	1	0.958871	1	PTEN;
Tetralogy of Fallot (rare)	1	4	0.621118	30.0818	0.0330737	1	1	1	STRA6;
Thick corpus callosum	1	4	0.621118	30.0818	0.0330737	1	1	1	PTEN;
Thick lips	1	14	0.621118	8.61013	0.111078	1	1	1	ABCC9;
Thrombosis	1	3	0.621118	40.0757	0.0249086	1	1	1	MPI;
Thyroid adenoma	1	1	0.621118	119.434	0.00837233	1	0.958871	1	PTEN;
Thyroid cancer (follicular cell)	1	1	0.621118	119.434	0.00837233	1	0.958871	1	PTEN;
Thyroid follicular cell tumor	1	1	0.621118	119.434	0.00837233	1	0.958871	1	PTEN;
Thyroiditis	1	1	0.621118	119.434	0.00837233	1	0.958871	1	PTEN;
Tongue polyps	1	1	0.621118	119.434	0.00837233	1	0.958871	1	PTEN;
Transitional cell carcinoma of the bladder	1	1	0.621118	119.434	0.00837233	1	0.958871	1	PTEN;
Trigonocephaly	1	6	0.621118	20.0712	0.0492005	1	1	1	PDHX;
Truncus arteriosus communis (rare)	1	1	0.621118	119.434	0.00837233	1	0.958871	1	STRA6;
Umbilical hernia	1	43	0.621118	2.80465	0.303664	1	1	1	ABCC9;
Unilobular lung	1	1	0.621118	119.434	0.00837233	1	0.958871	1	STRA6;
Unsteady gait	1	9	0.621118	13.3882	0.0728909	1	1	1	PDHX;
Urinary incontinence	1	25	0.621118	4.82319	0.189676	1	1	1	HSPD1;
Urinary urgency	1	18	0.621118	6.69783	0.140499	1	1	1	HSPD1;
Uterine adenocarcinoma	1	1	0.621118	119.434	0.00837233	1	0.958871	1	PTEN;
VACTERL ASSOCIATION WITH HYDROCEPHALUS	1	1	0.621118	119.434	0.00837233	1	0.958871	1	PTEN;
Vaginal cysts	1	1	0.621118	119.434	0.00837233	1	0.958871	1	PTEN;
Variable severity	1	55	0.621118	2.19284	0.370652	1	1	1	PDHX;
Varicocele	1	1	0.621118	119.434	0.00837233	1	0.958871	1	PTEN;
Vascular	4	215	2.48447	2.22747	0.106811	1	1	1	STRA6; PTEN; ABCC9; INVS;
Vascular anomalies (50% of patients)	1	1	0.621118	119.434	0.00837233	1	0.958871	1	PTEN;
Ventricular septal defect	1	52	0.621118	2.31932	0.354531	1	1	1	STRA6;
Vertebral anomalies	1	10	0.621118	12.0507	0.0806566	1	1	1	PTEN;
Villous atrophy	1	2	0.621118	60.0139	0.016675	1	1	1	MPI;
Virginal hyperplasia	1	1	0.621118	119.434	0.00837233	1	0.958871	1	PTEN;
Vomiting	1	86	0.621118	1.40249	0.515511	1	1	1	MPI;
Vulvar cysts	1	1	0.621118	119.434	0.00837233	1	0.958871	1	PTEN;
Weight	2	122	1.24224	1.96756	0.272168	1	1	1	PTEN; ABCC9;
Widened metaphyses	1	6	0.621118	20.0712	0.0492005	1	1	1	ABCC9;
Widened posterior fossa	1	1	0.621118	119.434	0.00837233	1	0.958871	1	ABCC9;
Widened ribs	1	1	0.621118	119.434	0.00837233	1	0.958871	1	ABCC9;

## Sheet: COSMIC
Analysis: COSMIC
Dataset name: Racing
Number of genes in the dataset: 161
Number of genes in the dataset (which are available in COSMIC database) :159
Number of genes in background: 19230
Is analysis quantitative: No
						Corrected p-values
COSMIC	No. of genes in the dataset	No.of genes in the background dataset	Percentage of genes	Fold enrichment	P-value (Hypergeometric test)	Bonferroni method	BH method	Q-value (Storey-Tibshirani method)
skin	98	11549	60.8696	1.01357	0.450172	1	0.90813	1	PCK2; DCAF11; SGMS1; SEC23IP; CHRNB4; NEIL1; BBS4; ISLR; PRLHR; SENP8; PML; BAG3; WDR61; PKM; NPTN; CYP1A2; PAPSS2; ODF3L1; LMAN1L; UBE2Q2; PSMA4; CHRNA3; A1CF; TMEM202; CSPG4; MPI; SLIT1; CCDC33; MINPP1; CSK; CYP1A1; PRKG1; INPP5F; MCMBP; SCAMP2; SNX33; CRABP1; PARP6; MYO9A; IREB2; STRA6; PTEN; CYP11A1; C15orf39; DKK1; EDC3; ARIH1; STOML1; ADPGK; NRG4; CHRNA5; MAN2C1; EIF3A; PTPN9; GRK5; DNAJA4;…
prostate	73	9587	45.3416	0.909548	0.890566	1	1	1	PCK2; SGMS1; SEC23IP; ETFA; BBS4; ISLR; CSTF2T; LINGO1; HYKK; PKM; NPTN; PAPSS2; LMAN1L; TIAL1; CHRNA3; A1CF; CSPG4; SLIT1; ARID3B; CACUL1; CSK; CYP1A1; PRKG1; MCMBP; SNX33; MYO9A; IREB2; STRA6; PTEN; CYP11A1; FAM204A; ARIH1; ADPGK; ULK3; SCAPER; MAN2C1; EIF3A; PTPN9; CLK3; LOXL1; RGS10; LRRC49; SIN3A; NEO1; HECW1; STK17A; COA1; ZPBP; PCLO; ST7L; TSPAN9; ABCC9; CNTN1; MLXIP; IL31; LRRC43; CLIP1; …
biliary tract	18	1799	11.1801	1.19566	0.247281	1	0.865485	1	PCK2; SEC23IP; PSTPIP1; BBS4; ISLR; PAPSS2; ISL2; PSMA4; PRKG1; PTEN; LRRC49; SIN3A; NEO1; ZPBP; MLXIP; SYT3; TANC2; C11orf53;
CancerGeneCensus geneList	4	503	2.48447	0.952126	0.61058	1	0.986322	1	PML; PTEN; CASP8; POU2AF1;
lung	128	15353	79.5031	0.995811	0.58848	1	0.986322	1	NRL; PCK2; SGMS1; SEMA7A; ATAD1; SEC23IP; ZWINT; NEIL1; C15orf59; ETFA; PSTPIP1; BBS4; PRLHR; PML; CSTF2T; BAG3; LINGO1; CPLX3; HYKK; PKM; NPTN; CYP1A2; PAPSS2; LMAN1L; ISL2; UBE2Q2; PSMA4; TIAL1; CHRNA3; A1CF; CSPG4; MPI; SLIT1; CCDC33; MINPP1; CACUL1; CSK; FAM45A; CYP1A1; PRKG1; UBL7; COMMD4; INPP5F; NR2E3; SCAMP2; SNX33; MYO9A; RCN2; IREB2; STRA6; PTEN; PRDX3; CYP11A1; C15orf39; DKK1; FAM204A;…
autonomic ganglia	7	736	4.34783	1.13753	0.420282	1	0.90813	1	BBS4; CSPG4; CYP1A1; PRKG1; CYP11A1; C15orf39; STK17A;
meninges	5	447	3.10559	1.33859	0.320154	1	0.90813	1	CYP1A2; MYO9A; PTEN; TANC2; CIB4;
kidney	111	13456	68.9441	0.985309	0.648845	1	1	1	PCK2; DCAF11; SGMS1; SEMA7A; ATAD1; SEC23IP; ZWINT; CHRNB4; BBS4; ISLR; SENP8; PML; CSTF2T; BAG3; LINGO1; PKM; CYP1A2; PAPSS2; ODF3L1; LMAN1L; ISL2; UBE2Q2; TIAL1; CHRNA3; A1CF; CSPG4; MPI; SLIT1; CCDC33; ARID3B; CSK; FAM45A; CYP1A1; TSPAN3; UBL7; COMMD4; INPP5F; MCMBP; NR2E3; SCAMP2; SNX33; PARP6; MYO9A; RCN2; IREB2; STRA6; PTEN; CYP11A1; SNUPN; DKK1; EDC3; FAM204A; ARIH1; RAB11FIP2; ULK3; CHRNA…
endometrium	108	12807	67.0807	1.00726	0.485217	1	0.90813	1	PCK2; DCAF11; SGMS1; COX5A; SEMA7A; SEC23IP; ZWINT; CHRNB4; NEIL1; C15orf59; ETFA; PSTPIP1; BBS4; PML; CSTF2T; BAG3; WDR61; LINGO1; HYKK; PKM; NPTN; CYP1A2; PAPSS2; LMAN1L; TIAL1; CHRNA3; CSPG4; MPI; SLIT1; CCDC33; ARID3B; CACUL1; CSK; FAM45A; CYP1A1; PRKG1; UBL7; INPP5F; MCMBP; NR2E3; SNX33; PARP6; MYO9A; RCN2; IREB2; PTEN; PRDX3; SNUPN; C15orf39; EDC3; ARIH1; STOML1; RAB11FIP2; ADPGK; CHRNA5; M…
stomach	17	1289	10.559	1.57607	0.0420823	1	0.516605	0.882755	SEMA7A; PRKG1; NR2E3; PTEN; ARIH1; CLK3; GRK5; SIN3A; HECW1; ZPBP; ABCC9; CNTN1; PRPSAP1; PRKCA; TANC2; PACSIN2; ARHGAP20;
large intestine	153	17427	95.0311	1.04863	0.0290462	1	0.516605	0.882755	NRL; PCK2; DCAF11; SGMS1; COX5A; SEMA7A; ATAD1; SEC23IP; ZWINT; CHRNB4; NEIL1; C15orf59; ETFA; PSTPIP1; BBS4; ISLR; PRLHR; SENP8; PML; CSTF2T; BAG3; WDR61; LINGO1; CPLX3; HYKK; PKM; NPTN; CYP1A2; PAPSS2; ODF3L1; LMAN1L; ISL2; UBE2Q2; PSMA4; FAM219B; TIAL1; CHRNA3; A1CF; TMEM202; CSPG4; MPI; SLIT1; CCDC33; MINPP1; ARID3B; CACUL1; CSK; FAM45A; CYP1A1; TSPAN3; PRKG1; UBL7; COMMD4; INPP5F; MCMBP; NR2…
parathyroid	1	202	0.621118	0.597139	0.818647	1	1	1	ULK3;
genital tract	1	6	0.621118	20.0712	0.0492005	1	0.516605	0.882755	PTEN;
soft tissue	2	186	1.24224	1.29058	0.462799	1	0.90813	1	SNX33; PTEN;
central nervous system	101	12014	62.7329	1.00416	0.508228	1	0.90813	1	NRL; PCK2; DCAF11; SEMA7A; ATAD1; SEC23IP; CHRNB4; NEIL1; ETFA; BBS4; RPP25; ISLR; PRLHR; SENP8; PML; BAG3; WDR61; LINGO1; HYKK; PKM; CYP1A2; PAPSS2; LMAN1L; CHRNA3; A1CF; TMEM202; CSPG4; SLIT1; CCDC33; MINPP1; ARID3B; CACUL1; CSK; PRKG1; COMMD4; INPP5F; MCMBP; NR2E3; SCAMP2; SNX33; MYO9A; IREB2; STRA6; PTEN; CYP11A1; C15orf39; DKK1; EDC3; ARIH1; RAB11FIP2; SCAMP5; NRG4; ULK3; CHRNA5; SCAPER; MAN…
eye	7	461	4.34783	1.81608	0.0931756	1	0.550205	0.940169	NRL; SENP8; CCDC33; PTEN; EDC3; SIN3A; PCLO;
ovary	103	12007	63.9752	1.02464	0.37587	1	0.90813	1	PCK2; DCAF11; SGMS1; SEMA7A; ATAD1; SEC23IP; ZWINT; NEIL1; PSTPIP1; ISLR; PRLHR; SENP8; PML; CSTF2T; BAG3; WDR61; LINGO1; HYKK; CYP1A2; PAPSS2; ISL2; UBE2Q2; PSMA4; TIAL1; CHRNA3; A1CF; TMEM202; CSPG4; MPI; SLIT1; CCDC33; ARID3B; CACUL1; CSK; FAM45A; CYP1A1; TSPAN3; PRKG1; UBL7; INPP5F; MCMBP; SCAMP2; SNX33; MYO9A; RCN2; IREB2; PTEN; CYP11A1; DKK1; EDC3; FAM204A; STOML1; SCAMP5; ULK3; CHRNA5; SCA…
vulva	1	1	0.621118	119.434	0.00837233	0.351638	0.351638	0.600865	PTEN;
bone	7	1330	4.34783	0.629491	0.93447	1	1	1	CSTF2T; PKM; PARP6; PTEN; EIF3A; PCLO; GPR142;
240 NB cases mutantgeneList	34	3941	21.118	1.03068	0.453148	1	0.90813	1	NRL; SEC23IP; ZWINT; CHRNB4; NEIL1; PSTPIP1; BAG3; PKM; CHRNA3; A1CF; CSPG4; CYP1A1; UBL7; COMMD4; INPP5F; MCMBP; SNX33; MYO9A; CYP11A1; C15orf39; DKK1; EIF3A; PEAK1; NEO1; HECW1; ZPBP; PCLO; ABCC9; ABLIM3; PACSIN2; ZC3H12C; POU2AF1; ARHGAP20; KIRREL3;
haematopoietic and lymphoid tissue	80	8977	49.6894	1.06448	0.24527	1	0.865485	1	NRL; PCK2; DCAF11; SEMA7A; ZWINT; CHRNB4; C15orf59; PSTPIP1; PRLHR; PML; CSTF2T; WDR61; CYP1A2; PAPSS2; TIAL1; CHRNA3; SLIT1; FAM45A; CYP1A1; PRKG1; UBL7; SCAMP2; SNX33; PARP6; MYO9A; IREB2; STRA6; PTEN; CYP11A1; SNUPN; C15orf39; EDC3; FAM204A; PPCDC; ARIH1; STOML1; RAB11FIP2; SCAMP5; CHRNA5; SCAPER; EIF3A; CLK3; DNAJA4; LRRC49; SIN3A; HECW1; VWC2; ZPBP; PCLO; DDX11; TSPAN9; ABCC9; CNTN1; RAB35; …
breast	132	14924	81.9876	1.05645	0.104801	1	0.550205	0.940169	NRL; PCK2; DCAF11; SGMS1; SEMA7A; ATAD1; SEC23IP; ZWINT; CHRNB4; NEIL1; C15orf59; PSTPIP1; BBS4; RPP25; ISLR; PRLHR; SENP8; PML; CSTF2T; WDR61; LINGO1; CPLX3; HYKK; PKM; NPTN; CYP1A2; PAPSS2; ODF3L1; LMAN1L; ISL2; UBE2Q2; FAM219B; TIAL1; CHRNA3; A1CF; TMEM202; CSPG4; SLIT1; CCDC33; MINPP1; ARID3B; FAM45A; CYP1A1; PRKG1; UBL7; COMMD4; INPP5F; MCMBP; NR2E3; SCAMP2; SNX33; CRABP1; PARP6; MYO9A; RCN2…
upper aerodigestive tract	51	6364	31.677	0.957307	0.677354	1	1	1	PCK2; SEMA7A; CHRNB4; ISLR; PRLHR; HYKK; PKM; NPTN; CYP1A2; PAPSS2; ODF3L1; CHRNA3; TMEM202; CSPG4; SLIT1; CCDC33; TSPAN3; PRKG1; MYO9A; PTEN; CYP11A1; C15orf39; EDC3; ADPGK; GRK5; LRRC49; SIN3A; HECW1; VWC2; PCLO; ST7L; DDX11; ABCC9; CLIP1; RILPL2; TMEM71; ANKRD6; PRKCA; TANC2; YTHDC2; CIB4; KLHL29; MGAT5; PKP4; HSPD1; CASP8; INVS; ZC3H12C; B3GNT6; ARHGAP20; KIRREL3;
cervix	28	2590	17.3913	1.29163	0.0918709	1	0.550205	0.940169	DCAF11; PML; NPTN; CYP1A2; CHRNA3; TMEM202; CSPG4; INPP5F; MYO9A; IREB2; STRA6; PTEN; EDC3; PPCDC; RAB11FIP2; CHRNA5; CLK3; SIN3A; NEO1; PCLO; DDX11; CNTN1; PRKCA; TANC2; NTN1; YTHDC2; CASP8; PACSIN2;
thyroid	69	8760	42.8571	0.94088	0.778846	1	1	1	DCAF11; SEMA7A; C15orf59; ISLR; PML; BAG3; LINGO1; HYKK; PAPSS2; ISL2; UBE2Q2; CHRNA3; CSPG4; MPI; SLIT1; CCDC33; MINPP1; CYP1A1; PRKG1; SCAMP2; CRABP1; IREB2; PTEN; CYP11A1; C15orf39; PPCDC; RAB11FIP2; ULK3; CLK3; LOXL1; RGS10; DNAJA4; SIN3A; NEO1; HECW1; VWC2; PCLO; ST7L; DDX11; TSPAN9; CNTN1; RAB35; MLXIP; LRRC43; CLIP1; SYT3; ANKRD6; PRPSAP1; GPR142; PRKCA; PDHX; YTHDC2; C2orf70; KLHL29; MGAT…
liver	119	14176	73.913	1.00267	0.518931	1	0.90813	1	NRL; PCK2; DCAF11; SGMS1; COX5A; SEMA7A; ATAD1; SEC23IP; ZWINT; CHRNB4; NEIL1; ETFA; PSTPIP1; RPP25; ISLR; PRLHR; SENP8; PML; CSTF2T; BAG3; WDR61; LINGO1; CPLX3; PKM; NPTN; CYP1A2; PAPSS2; LMAN1L; ISL2; UBE2Q2; PSMA4; TIAL1; A1CF; TMEM202; CSPG4; MPI; SLIT1; CCDC33; FAM45A; TSPAN3; PRKG1; UBL7; INPP5F; MCMBP; NR2E3; SCAMP2; SNX33; CRABP1; PARP6; MYO9A; IREB2; STRA6; PTEN; CYP11A1; SNUPN; C15orf39…
pancreas	112	12286	69.5652	1.08886	0.0760665	1	0.550205	0.940169	PCK2; DCAF11; SGMS1; COX5A; SEMA7A; SEC23IP; ZWINT; CHRNB4; NEIL1; C15orf59; PSTPIP1; BBS4; ISLR; PML; CSTF2T; BAG3; LINGO1; HYKK; PKM; NPTN; CYP1A2; PAPSS2; ODF3L1; LMAN1L; ISL2; TIAL1; CHRNA3; A1CF; CSPG4; SLIT1; CCDC33; MINPP1; ARID3B; CSK; CYP1A1; PRKG1; UBL7; INPP5F; MCMBP; SCAMP2; CRABP1; PARP6; MYO9A; IREB2; STRA6; PTEN; PRDX3; CYP11A1; SNUPN; C15orf39; EDC3; PPCDC; RAB11FIP2; ADPGK; NRG4;…
neuroblastoma	7	744	4.34783	1.12529	0.43127	1	0.90813	1	BBS4; CSPG4; CYP1A1; PRKG1; CYP11A1; C15orf39; STK17A;
oesophagus	50	5660	31.0559	1.05528	0.353146	1	0.90813	1	ATAD1; SEC23IP; ZWINT; CHRNB4; PRLHR; PML; LINGO1; CPLX3; CYP1A2; ISL2; A1CF; MPI; SLIT1; CCDC33; MINPP1; CYP1A1; PRKG1; INPP5F; MCMBP; SNX33; MYO9A; PTEN; ADPGK; SCAPER; EIF3A; CLK3; NEO1; TBC1D21; HECW1; STK17A; PCLO; GOLT1B; ABCC9; CNTN1; MLXIP; IL31; CLIP1; SYT3; RRAGD; TANC2; ABLIM3; KLHL29; PKP4; CASP8; ALS2CR12; LCN15; PACSIN2; POU2AF1; RPS28; B3GNT6;
urinary tract	115	13085	71.4286	1.04976	0.201369	1	0.865485	1	NRL; DCAF11; SGMS1; COX5A; SEMA7A; SEC23IP; CHRNB4; C15orf59; BBS4; PRLHR; SENP8; PML; CSTF2T; BAG3; CPLX3; HYKK; PKM; CYP1A2; PAPSS2; ODF3L1; LMAN1L; UBE2Q2; CHRNA3; A1CF; TMEM202; CSPG4; MPI; SLIT1; CCDC33; MINPP1; ARID3B; CSK; FAM45A; CYP1A1; TSPAN3; PRKG1; UBL7; COMMD4; INPP5F; SCAMP2; SNX33; CRABP1; PARP6; MYO9A; RCN2; IREB2; PTEN; PRDX3; CYP11A1; SNUPN; C15orf39; EDC3; FAM204A; ARIH1; STOML…
small intestine	3	196	1.86335	1.83407	0.22639	1	0.865485	1	SGMS1; CCDC33; RCN2;
salivary gland	5	555	3.10559	1.07811	0.497742	1	0.90813	1	PTEN; SNUPN; TANC2; ALS2CR12; INVS;
