# Supplementary material for: Genome-Wide Signatures of Selection Reveal Genes Associated With Performance in American Quarter Horse Subpopulations
Source: Front Genet. 2018 Jul 19;9:249. doi: 10.3389/fgene.2018.00249 (PMC6060370; doi:10.3389/fgene.2018.00249)
Supplement: Supplementary Table 13 — FunRich3.0 functional enrichment and pathway analysis results for the western pleasure QH subpopulation. [file Table_13.XLSX]

## Sheet: Dataset(Western Pleasure)
Name of dataset: Western Pleasure
No. of identified items: 78 of 84
No. of unidentified items: 6
ID type: GeneSymbol
Number of mapped gene: 78
Is dataset quantitative :NO
Mapped items:
Dataset item (Gene symbol )		Entrez ID	Gene symbol	Description	Alternate names	Chromosome	Map location
FRMPD2		143162	FRMPD2	FERM and PDZ domain containing 2	PDZD5C|PDZK4|PDZK5C	10	10q11.22
NOC3L		64318	NOC3L	NOC3-like DNA replication regulator	AD24|C10orf117|FAD24	10	10q23.33
EPS8L1		54869	EPS8L1	EPS8-like 1	DRC3|EPS8R1|PP10566	19	19q13.42
ZNF581		51545	ZNF581	zinc finger protein 581	HSPC189	19	19q13.42
CCDC106		29903	CCDC106	coiled-coil domain containing 106	HSU79303|ZNF581	19	19q13.42
ZNF274		10782	ZNF274	zinc finger protein 274	HFB101|ZF2|ZKSCAN19|ZSCAN51	19	19qter
FCAR		2204	FCAR	Fc fragment of IgA receptor	CD89|CTB-61M7.2|FcalphaRI	19	19q13.42
U2AF2		11338	U2AF2	U2 small nuclear RNA auxiliary factor 2	U2AF65	19	19q13.42
TPD52L1		7164	TPD52L1	tumor protein D52-like 1	D53|hD53	6	6q22-q23
ZNF667		63934	ZNF667	zinc finger protein 667	MIPU1	19	19q13.43
ZNF530		348327	ZNF530	zinc finger protein 530	-	19	19q13.43
ZNF544		27300	ZNF544	zinc finger protein 544	-	19	19q13.43
ZNF8		7554	ZNF8	zinc finger protein 8	HF.18|Zfp128	19	19q13.43
RPS5		6193	RPS5	ribosomal protein S5	S5	19	19q13.4
KLK4		9622	KLK4	kallikrein-related peptidase 4	AI2A1|ARM1|EMSP|EMSP1|KLK-L1|PRSS17|PSTS|kallikrein	19	19q13.41
NAT14		57106	NAT14	N-acetyltransferase 14 (GCN5-related, putative)	KLP1	19	19q13.42
MTO1		25821	MTO1	mitochondrial tRNA translation optimization 1	CGI-02|COXPD10	6	6q13
GRIK2		2898	GRIK2	glutamate receptor, ionotropic, kainate 2	EAA4|GLR6|GLUK6|GLUR6|GluK2|MRT6	6	6q16.3
CD109		135228	CD109	CD109 molecule	CPAMD7|p180|r150	6	6q13
MYO6		4646	MYO6	myosin VI	DFNA22|DFNB37	6	6q13
NLRP5		126206	NLRP5	NLR family, pyrin domain containing 5	CLR19.8|MATER|NALP5|PAN11|PYPAF8	19	19q13.43
KIAA1191		57179	KIAA1191	KIAA1191	p60MONOX	5	5q35.2
PPIC		5480	PPIC	peptidylprolyl isomerase C (cyclophilin C)	CYPC	5	5q23.2
PGLS		25796	PGLS	6-phosphogluconolactonase	6PGL	19	19p13.2
SLC27A1		376497	SLC27A1	solute carrier family 27 (fatty acid transporter), member 1	ACSVL5|FATP|FATP-1|FATP1	19	19p13.11
UNC79		57578	UNC79	unc-79 homolog (C. elegans)	KIAA1409	14	14q32.12
GLE1		2733	GLE1	GLE1 RNA export mediator	GLE1L|LCCS|LCCS1|hGLE1	9	9q34.11
ODF2		4957	ODF2	outer dense fiber of sperm tails 2	CT134|ODF2/1|ODF2/2|ODF84	9	9q34.11
KIF5B		3799	KIF5B	kinesin family member 5B	HEL-S-61|KINH|KNS|KNS1|UKHC	10	10p11.22
PIP4K2A		5305	PIP4K2A	phosphatidylinositol-5-phosphate 4-kinase, type II, alpha	PI5P4KA|PIP5K2A|PIP5KII-alpha|PIP5KIIA|PIPK	10	10p12.2
PARD3		56288	PARD3	par-3 family cell polarity regulator	ASIP|Baz|PAR3|PAR3alpha|PARD-3|PARD3A|PPP1R118|SE2-5L16|SE2-5LT1|SE2-5T2	10	10p11.21
AARS		16	AARS	alanyl-tRNA synthetase	CMT2N|EIEE29	16	16q22
HYDIN		54768	HYDIN	HYDIN, axonemal central pair apparatus protein	CILD5|HYDIN1|HYDIN2|PPP1R31	16	16q22.2
VAC14		55697	VAC14	Vac14 homolog (S. cerevisiae)	ArPIKfyve|TAX1BP2|TRX	16	16q22.1
COG4		25839	COG4	component of oligomeric golgi complex 4	CDG2J|COD1	16	16q22.1
CDH5		1003	CDH5	cadherin 5, type 2 (vascular endothelium)	7B4|CD144	16	16q22.1
ZFHX3		463	ZFHX3	zinc finger homeobox 3	ATBF1|ATBT|ZNF927	16	16q22.3
DUS2		54920	DUS2	dihydrouridine synthase 2	DUS2L|SMM1|URLC8	16	16q22.1
PMFBP1		83449	PMFBP1	polyamine modulated factor 1 binding protein 1	-	16	16q22.2
DYRK3		8444	DYRK3	dual-specificity tyrosine-(Y)-phosphorylation regulated kinase 3	DYRK5|RED|REDK|hYAK3-2	1	1q32.1
SLC35F3		148641	SLC35F3	solute carrier family 35, member F3	-	1	1q42.2
FAS		355	FAS	Fas cell surface death receptor	ALPS1A|APO-1|APT1|CD95|FAS1|FASTM|TNFRSF6	10	10q24.1
ZNF784		147808	ZNF784	zinc finger protein 784	-	19	19q13.42
ZNF329		79673	ZNF329	zinc finger protein 329	-	19	19q13.43
KLK11		11012	KLK11	kallikrein-related peptidase 11	PRSS20|TLSP	19	19q13.33
ZNF583		147949	ZNF583	zinc finger protein 583	-	19	19q13.43
HDDC2		51020	HDDC2	HD domain containing 2	C6orf74|CGI-130|NS5ATP2|dJ167O5.2	6	6q13-q24.3
KLK12		43849	KLK12	kallikrein-related peptidase 12	KLK-L5|KLKL5	19	19q13.33
SLC17A5		26503	SLC17A5	solute carrier family 17 (acidic sugar transporter), member 5	AST|ISSD|NSD|SD|SIALIN|SIASD|SLD	6	6q13
LENG8		114823	LENG8	leukocyte receptor cluster (LRC) member 8	pp13842	19	19q13.42
IMPG1		3617	IMPG1	interphotoreceptor matrix proteoglycan 1	GP147|IPM150|SPACR|VMD4	6	6q14.2-q15
TTYH1		57348	TTYH1	tweety family member 1	-	19	19q13.4
SNX24		28966	SNX24	sorting nexin 24	PRO1284|SBBI31	5	5q23.2
SIMC1		375484	SIMC1	SUMO-interacting motifs containing 1	C5orf25|OOMA1|PLEIAD	5	5q35.2
BHLHE40		8553	BHLHE40	basic helix-loop-helix family, member e40	BHLHB2|DEC1|HLHB2|SHARP-2|STRA13|Stra14	3	3p26
GRM7		2917	GRM7	glutamate receptor, metabotropic 7	GLUR7|GPRC1G|MGLU7|MGLUR7|PPP1R87	3	3p26.1-p25.1
STX12		23673	STX12	syntaxin 12	STX13|STX14	1	1p35.3
PRIMA1		145270	PRIMA1	proline rich membrane anchor 1	PRIMA	14	14q32.12
DEPDC4		120863	DEPDC4	DEP domain containing 4	DEP.4	12	12q23.1
KIAA1217		56243	KIAA1217	KIAA1217	SKT	10	10p12.31
CCNY		219771	CCNY	cyclin Y	C10orf9|CBCP1|CCNX|CFP1	10	10p11.21
DDX28		55794	DDX28	DEAD (Asp-Glu-Ala-Asp) box polypeptide 28	MDDX28	16	16q22.1
DDX19A		55308	DDX19A	DEAD (Asp-Glu-Ala-Asp) box polypeptide 19A	DDX19-DDX19L|DDX19L	16	16q22.1
SF3B3		23450	SF3B3	splicing factor 3b, subunit 3, 130kDa	RSE1|SAP130|SF3b130|STAF130	16	16q22.1
CFDP1		10428	CFDP1	craniofacial development protein 1	BCNT|BUCENTAUR|CENP-29|CP27|SWC5|Yeti|p97	16	16q22.2-q22.3
GLG1		2734	GLG1	golgi glycoprotein 1	CFR-1|ESL-1|MG-160|MG160	16	16q22.3
DDX19B		11269	DDX19B	DEAD (Asp-Glu-Ala-Asp) box polypeptide 19B	DBP5|DDX19|RNAh	16	16q22.1
JAKMIP1		152789	JAKMIP1	janus kinase and microtubule interacting protein 1	Gababrbp|JAMIP1|MARLIN1	4	4p16.1
SEMA3E		9723	SEMA3E	sema domain, immunoglobulin domain (Ig), short basic domain, secreted, (semaphorin) 3E	M-SEMAH|M-SemaK|SEMAH|coll-5	7	7q21.11
NTM		50863	NTM	neurotrimin	HNT|IGLON2|NTRI	11	11q25
OPCML		4978	OPCML	opioid binding protein/cell adhesion molecule-like	IGLON1|OBCAM|OPCM	11	11q25
TBCEL		219899	TBCEL	tubulin folding cofactor E-like	El|LRRC35	11	11q23.3
CLNS1A		1207	CLNS1A	chloride channel, nucleotide-sensitive, 1A	CLCI|CLNS1B|ICln	11	11q13.5-q14
TECTA		7007	TECTA	tectorin alpha	DFNA12|DFNA8|DFNB21	11	11q22-q24
GRIK4		2900	GRIK4	glutamate receptor, ionotropic, kainate 4	EAA1|GRIK|GluK4|KA1	11	11q22.3
SC5D		6309	SC5D	sterol-C5-desaturase	ERG3|S5DES|SC5DL	11	11q23.3
UBASH3B		84959	UBASH3B	ubiquitin associated and SH3 domain containing B	STS-1|STS1|TULA-2|TULA2|p70	11	11q24.1
SORL1		6653	SORL1	sortilin-related receptor, L(DLR class) A repeats containing	C11orf32|LR11|LRP9|SORLA|SorLA-1|gp250	11	11q23.2-q24.2

## Sheet: Cellular component
Analysis: Cellular component
Dataset name: Western Pleasure
Number of genes in the dataset: 78
Number of genes in the dataset (which are available in Cellular component database) :68
Number of genes in background: 19230
Is analysis quantitative: No
						Corrected p-values
Cellular component	No. of genes in the dataset	No.of genes in the background dataset	Percentage of genes	Fold enrichment	P-value (Hypergeometric test)	Bonferroni method	BH method	Q-value (Storey-Tibshirani method)
Plasma membrane	18	3479	23.0769	1.27611	0.158594	1	1	1	FCAR; GRIK2; CD109; MYO6; SLC27A1; PARD3; CDH5; FAS; GRM7; STX12; PRIMA1; CCNY; GLG1; NTM; OPCML; CLNS1A; GRIK4; SORL1;
Integral to membrane	3	1702	3.84615	0.435947	0.973445	1	1	1	SLC35F3; TTYH1; GRM7;
Integral to plasma membrane	7	934	8.97436	1.8501	0.0842607	1	1	1	FCAR; GRIK2; SLC17A5; GRM7; OPCML; GRIK4; SORL1;
Golgi aparatus	4	897	5.12821	1.10199	0.496389	1	1	1	MYO6; COG4; GLG1; SORL1;
Nucleus	26	5847	33.3333	1.09657	0.325464	1	1	1	ZNF581; U2AF2; ZNF544; ZNF8; KLK4; NAT14; MYO6; NLRP5; PGLS; ZFHX3; DUS2; PMFBP1; DYRK3; ZNF784; ZNF329; ZNF583; BHLHE40; STX12; CCNY; DDX28; SF3B3; CFDP1; DDX19B; TBCEL; CLNS1A; SC5D;
Perinuclear region of cytoplasm	2	119	2.5641	4.16334	0.0842005	1	1	1	TPD52L1; MYO6;
Actin cytoskeleton	1	132	1.28205	1.88601	0.416285	1	1	1	PARD3;
Ribonucleoprotein complex	2	65	2.5641	7.62158	0.0286539	1	1	1	RPS5; JAKMIP1;
Nucleolus	4	1257	5.12821	0.786384	0.758644	1	1	1	NOC3L; ZNF274; U2AF2; RPS5;
Mitochondrion	5	1259	6.41026	0.980929	0.584856	1	1	1	MTO1; KIF5B; AARS; DDX28; GLG1;
Cytosolic small ribosomal subunit	1	36	1.28205	6.91397	0.136233	1	1	1	RPS5;
Cytosol	5	1178	6.41026	1.04838	0.524535	1	1	1	RPS5; MYO6; ODF2; AARS; FAS;
Mitochondrial nucleoid	1	31	1.28205	8.02877	0.118469	1	1	1	DDX28;
Ribosome	1	144	1.28205	1.72885	0.444267	1	1	1	RPS5;
Membrane fraction	3	346	3.84615	2.14441	0.165703	1	1	1	CDH5; SLC17A5; JAKMIP1;
Cytoplasm	25	5684	32.0513	1.08465	0.354357	1	1	1	U2AF2; TPD52L1; MYO6; NLRP5; KIAA1191; PPIC; PGLS; GLE1; ODF2; PIP4K2A; PARD3; AARS; COG4; DYRK3; FAS; KLK11; SNX24; CCNY; SF3B3; CFDP1; DDX19B; TBCEL; CLNS1A; UBASH3B; SORL1;
Exosomes	11	2043	14.1026	1.32845	0.202623	1	1	1	EPS8L1; RPS5; MYO6; PGLS; AARS; FAS; DDX19A; GLG1; DDX19B; TECTA; SORL1;
Lysosome	8	1620	10.2564	1.21883	0.334552	1	1	1	MYO6; PGLS; PIP4K2A; VAC14; SLC17A5; STX12; CCNY; GLG1;
Endoplasmic reticulum	4	1104	5.12821	0.895366	0.661919	1	1	1	PPIC; DUS2; JAKMIP1; SC5D;
Endosome	1	303	1.28205	0.821663	0.710994	1	1	1	STX12;
Extracellular	10	1825	12.8205	1.35207	0.202945	1	1	1	FCAR; KLK4; PPIC; FAS; KLK11; KLK12; IMPG1; CFDP1; SEMA3E; TECTA;
Kinetochore	1	90	1.28205	2.76605	0.306946	1	1	1	PMFBP1;
Extracellular region	3	442	3.84615	1.67866	0.266669	1	1	1	KLK4; KLK12; SEMA3E;
Golgi transport complex	1	9	1.28205	27.6329	0.0359261	1	1	1	COG4;
Nuclear pore	2	42	2.5641	11.7943	0.0125916	1	1	1	GLE1; DDX19B;
Membrane	2	350	2.5641	1.41561	0.416538	1	1	1	CD109; GLG1;
Extracellular space	1	404	1.28205	0.616252	0.809768	1	1	1	SEMA3E;
Nucleoplasm	2	449	2.5641	1.10349	0.54679	1	1	1	MYO6; GLE1;
Dendrite	1	27	1.28205	9.21777	0.103999	1	1	1	GRM7;
Centrosome	5	656	6.41026	1.88259	0.127485	1	1	1	U2AF2; RPS5; ODF2; VAC14; UBASH3B;
Soluble fraction	4	180	5.12821	5.49132	0.0061825	1	1	1	AARS; FAS; KLK12; JAKMIP1;
Cytoskeleton	1	427	1.28205	0.583059	0.827102	1	1	1	FRMPD2;
Cell-cell junction	1	38	1.28205	6.55017	0.143239	1	1	1	CDH5;
Microtubule	2	129	2.5641	3.84063	0.0965276	1	1	1	KIF5B; JAKMIP1;
Ruffle	1	24	1.28205	10.3695	0.0929923	1	1	1	MYO6;
Cytoplasmic membrane-bounded vesicle	1	19	1.28205	13.0969	0.0743509	1	1	1	MYO6;
Endosome membrane	1	27	1.28205	9.21777	0.103999	1	1	1	VAC14;
Proteinaceous extracellular matrix	1	70	1.28205	3.55624	0.248002	1	1	1	IMPG1;
Transcription factor complex	1	43	1.28205	5.7887	0.16051	1	1	1	ZFHX3;
Nuclear membrane	2	78	2.5641	6.35148	0.0400025	1	1	1	MYO6; GLE1;
Cell cortex	1	20	1.28205	12.4424	0.0781092	1	1	1	GRM7;
Microsome	2	156	2.5641	3.17594	0.132038	1	1	1	VAC14; SC5D;
Cell junction	1	38	1.28205	6.55017	0.143239	1	1	1	CDH5;
Lysosomal membrane	1	14	1.28205	17.771	0.0553313	1	1	1	SLC17A5;
Membrane raft	1	36	1.28205	6.91397	0.136233	1	1	1	STX12;
Golgi membrane	1	55	1.28205	4.52594	0.200571	1	1	1	GLG1;
Spliceosomal complex	2	46	2.5641	10.7689	0.0149792	1	1	1	U2AF2; SF3B3;
Basolateral plasma membrane	1	40	1.28205	6.22275	0.150189	1	1	1	FRMPD2;
Unconventional myosin complex	1	7	1.28205	35.5167	0.0280543	1	1	1	MYO6;
DNA-directed RNA polymerase II, holoenzyme	1	5	1.28205	49.695	0.020119	1	1	1	MYO6;
Cytoplasmic cyclin-dependent protein kinase holoenzyme complex	1	2	1.28205	123.867	0.00809608	1	1	1	CCNY;
Kinesin complex	1	9	1.28205	27.6329	0.0359261	1	1	1	KIF5B;
Tight junction	2	14	2.5641	35.3661	0.00143206	1	1	1	FRMPD2; PARD3;
Filamentous actin	1	9	1.28205	27.6329	0.0359261	1	1	1	MYO6;
Phagocytic vesicle	1	4	1.28205	62.0878	0.0161275	1	1	1	STX12;
Small nuclear ribonucleoprotein complex	1	16	1.28205	15.551	0.062985	1	1	1	SF3B3;
Death-inducing signaling complex	1	4	1.28205	62.0878	0.0161275	1	1	1	FAS;
Clathrin-coated endocytic vesicle	1	3	1.28205	82.715	0.0121198	1	1	1	MYO6;
Peripheral to membrane of membrane fraction	1	2	1.28205	123.867	0.00809608	1	1	1	JAKMIP1;

## Sheet: Molecular function
Analysis: Molecular function
Dataset name: Western Pleasure
Number of genes in the dataset: 78
Number of genes in the dataset (which are available in Molecular function database) :78
Number of genes in background: 19230
Is analysis quantitative: No
						Corrected p-values
Molecular function	No. of genes in the dataset	No.of genes in the background dataset	Percentage of genes	Fold enrichment	P-value (Hypergeometric test)	Bonferroni method	BH method	Q-value (Storey-Tibshirani method)
Molecular function unknown	22	5685	28.2051	0.954373	0.645372	1	1	1	FRMPD2; NOC3L; EPS8L1; CCDC106; TPD52L1; ZNF667; MTO1; CD109; NLRP5; KIAA1191; UNC79; HYDIN; VAC14; HDDC2; LENG8; SIMC1; DEPDC4; KIAA1217; CCNY; DDX19A; CFDP1; UBASH3B;
Cell adhesion molecule activity	3	356	3.84615	2.08417	0.175649	1	1	1	CDH5; NTM; OPCML;
Ligase activity	1	112	1.28205	2.22277	0.366526	1	1	1	AARS;
Transporter activity	5	576	6.41026	2.14406	0.0845965	1	1	1	GLE1; COG4; SLC17A5; SNX24; CLNS1A;
ATPase activity	1	111	1.28205	2.24279	0.363931	1	1	1	DDX19B;
Catalytic activity	2	532	2.5641	0.931334	0.639673	1	1	1	DUS2; SC5D;
Ion channel activity	1	66	1.28205	3.77173	0.235632	1	1	1	TTYH1;
Hydrolase activity	1	203	1.28205	1.2264	0.56371	1	1	1	PGLS;
Serine-type peptidase activity	3	98	3.84615	7.57051	0.00740751	1	0.829641	1	KLK4; KLK11; KLK12;
Receptor binding	2	129	2.5641	3.84063	0.0965276	1	1	1	GLG1; JAKMIP1;
Cytoskeletal protein binding	1	218	1.28205	1.14202	0.589791	1	1	1	TBCEL;
G-protein coupled receptor activity	1	736	1.28205	0.338273	0.95265	1	1	1	GRM7;
Protein serine/threonine kinase activity	1	301	1.28205	0.827122	0.708598	1	1	1	DYRK3;
Transcription regulator activity	3	832	3.84615	0.891799	0.661823	1	1	1	ZNF274; ZNF8; ZNF583;
Extracellular matrix structural constituent	3	166	3.84615	4.46953	0.030002	1	1	1	IMPG1; SEMA3E; TECTA;
Receptor activity	4	361	5.12821	2.73813	0.0590967	1	1	1	FCAR; FAS; PRIMA1; GRIK4;
Transcription factor activity	3	842	3.84615	0.881208	0.669817	1	1	1	NAT14; PMFBP1; BHLHE40;
Receptor signaling complex scaffold activity	1	322	1.28205	0.773181	0.732814	1	1	1	PARD3;
Binding	1	22	1.28205	11.3118	0.0855806	1	1	1	FAS;
RNA binding	2	366	2.5641	1.35373	0.438879	1	1	1	DUS2; DDX28;
DNA binding	6	654	7.69231	2.26527	0.0495249	1	1	1	ZNF581; ZNF530; ZNF544; ZFHX3; ZNF784; ZNF329;
Chaperone activity	1	126	1.28205	1.97581	0.401777	1	1	1	PPIC;
Auxiliary transport protein activity	3	333	3.84615	2.22812	0.153043	1	1	1	SLC27A1; SLC35F3; STX12;
Motor activity	3	79	3.84615	9.39104	0.00406874	0.911398	0.829641	1	MYO6; ODF2; KIF5B;
Structural constituent of ribosome	1	152	1.28205	1.63787	0.462181	1	1	1	RPS5;
Lipid kinase activity	1	35	1.28205	7.11146	0.132709	1	1	1	PIP4K2A;
Extracellular ligand-gated ion channel activity	1	41	1.28205	6.07101	0.153644	1	1	1	GRIK2;
Transmembrane receptor activity	1	52	1.28205	4.787	0.190736	1	1	1	SORL1;
Ribonucleoprotein	1	41	1.28205	6.07101	0.153644	1	1	1	SF3B3;
Spliceosomal catalysis	1	3	1.28205	82.715	0.0121198	1	0.904947	1	U2AF2;

## Sheet: Biological process
Analysis: Biological process
Dataset name: Western Pleasure
Number of genes in the dataset: 78
Number of genes in the dataset (which are available in Biological process database) :78
Number of genes in background: 19230
Is analysis quantitative: No
						Corrected p-values
Biological process	No. of genes in the dataset	No.of genes in the background dataset	Percentage of genes	Fold enrichment	P-value (Hypergeometric test)	Bonferroni method	BH method	Q-value (Storey-Tibshirani method)
Biological_process unknown	17	4731	21.7949	0.886298	0.757111	1	1	1	FRMPD2; NOC3L; EPS8L1; CCDC106; ZNF667; KIAA1191; UNC79; HYDIN; VAC14; HDDC2; LENG8; SIMC1; DEPDC4; KIAA1217; CCNY; GLG1; NTM;
Protein metabolism	6	1323	7.69231	1.1198	0.450378	1	1	1	RPS5; KLK4; PPIC; AARS; KLK11; KLK12;
Metabolism	2	1683	2.5641	0.294401	0.993377	1	1	1	PGLS; DDX19B;
Energy pathways	1	1633	1.28205	0.152462	0.999028	1	1	1	PGLS;
Cell growth and/or maintenance	9	1125	11.5385	1.97423	0.0379805	1	1	1	MYO6; ODF2; KIF5B; CDH5; DYRK3; IMPG1; CFDP1; SEMA3E; TECTA;
Transport	10	1215	12.8205	2.03088	0.0246355	1	0.877023	1	GRIK2; SLC27A1; GLE1; COG4; SLC35F3; SLC17A5; TTYH1; SNX24; STX12; CLNS1A;
Cell communication	8	3713	10.2564	0.531784	0.989885	1	1	1	PIP4K2A; PARD3; FAS; PRIMA1; OPCML; GRIK4; UBASH3B; SORL1;
Signal transduction	11	3934	14.1026	0.689892	0.943131	1	1	1	EPS8L1; TPD52L1; PIP4K2A; PARD3; DYRK3; FAS; GRM7; PRIMA1; GRIK4; UBASH3B; SORL1;
Regulation of nucleobase, nucleoside, nucleotide and nucleic acid metabolism	16	2828	20.5128	1.39553	0.10176	1	1	1	ZNF581; ZNF274; ZNF530; ZNF544; ZNF8; NAT14; ZFHX3; PMFBP1; ZNF784; ZNF329; ZNF583; BHLHE40; DDX28; DDX19A; SF3B3; JAKMIP1;
RNA metabolism	2	26	2.5641	19.0496	0.00495592	0.882153	0.877023	1	U2AF2; MTO1;
Vesicle-mediated transport	1	17	1.28205	14.6368	0.0667889	1	1	1	JAKMIP1;
Regulation of cell proliferation	1	23	1.28205	10.8202	0.0892939	1	1	1	TPD52L1;
Immune response	3	576	3.84615	1.28815	0.415085	1	1	1	FCAR; CD109; NLRP5;
Anti-apoptosis	1	32	1.28205	7.77795	0.122051	1	1	1	FAS;
Fatty acid metabolism	1	12	1.28205	20.7304	0.047616	1	1	1	SC5D;
Cytoskeleton organization and biogenesis	1	21	1.28205	11.8502	0.0818524	1	1	1	JAKMIP1;
Synaptic transmission	1	4	1.28205	62.0878	0.0161275	1	0.877023	1	GRM7;
Regulation of translation	1	13	1.28205	19.137	0.0514814	1	1	1	DUS2;
Microtubule-based process	1	5	1.28205	49.695	0.020119	1	0.877023	1	TBCEL;
Signal complex formation	1	3	1.28205	82.715	0.0121198	1	0.877023	1	JAKMIP1;

## Sheet: Biological pathway
Analysis: Biological pathway
Dataset name: Western Pleasure
Number of genes in the dataset: 78
Number of genes in the dataset (which are available in Biological pathway database) :24
Number of genes in background: 19230
Is analysis quantitative: No
						Corrected p-values
Biological pathway	No. of genes in the dataset	No.of genes in the background dataset	Percentage of genes	Fold enrichment	P-value (Hypergeometric test)	Bonferroni method	BH method	Q-value (Storey-Tibshirani method)
Developmental Biology	2	432	2.5641	1.14692	0.525862	1	1	1	RPS5; SEMA3E;
Axon guidance	1	219	1.28205	1.13681	0.591474	1	1	1	SEMA3E;
Semaphorin interactions	1	64	1.28205	3.88958	0.229373	1	1	1	SEMA3E;
Other semaphorin interactions	1	16	1.28205	15.551	0.062985	1	1	1	SEMA3E;
Regulation of beta-cell development	1	108	1.28205	2.30508	0.356082	1	1	1	RPS5;
Regulation of gene expression in beta cells	1	98	1.28205	2.54027	0.329226	1	1	1	RPS5;
Mitotic Prophase	1	62	1.28205	4.01503	0.223062	1	1	1	ODF2;
Golgi Cisternae Pericentriolar Stack Reorganization	1	62	1.28205	4.01503	0.223062	1	1	1	ODF2;
Mitotic M-M/G1 phases	1	242	1.28205	1.02877	0.628355	1	1	1	ODF2;
M Phase	1	158	1.28205	1.57567	0.475242	1	1	1	ODF2;
DNA Replication	1	261	1.28205	0.953879	0.656326	1	1	1	ODF2;
Post-Elongation Processing of the Transcript	1	43	1.28205	5.7887	0.16051	1	1	1	U2AF2;
Post-Elongation Processing of Intron-Containing pre-mRNA	1	34	1.28205	7.32055	0.12917	1	1	1	U2AF2;
mRNA 3'-end processing	1	34	1.28205	7.32055	0.12917	1	1	1	U2AF2;
Neurotransmitter Receptor Binding And Downstream Transmission In The Postsynaptic Cell	2	89	2.5641	5.56655	0.0507081	1	1	1	GRIK2; MYO6;
Glutamate Binding, Activation of AMPA Receptors and Synaptic Plasticity	1	21	1.28205	11.8502	0.0818524	1	1	1	MYO6;
Trafficking of AMPA receptors	1	21	1.28205	11.8502	0.0818524	1	1	1	MYO6;
Neuronal System	2	188	2.5641	2.63539	0.177217	1	1	1	GRIK2; MYO6;
Transmission across Chemical Synapses	2	121	2.5641	4.09453	0.0866249	1	1	1	GRIK2; MYO6;
Activation of Na-permeable Kainate Receptors	1	2	1.28205	123.867	0.00809608	1	1	1	GRIK2;
Ionotropic activity of Kainate Receptors	1	2	1.28205	123.867	0.00809608	1	1	1	GRIK2;
Activation of Kainate Receptors upon glutamate binding	1	8	1.28205	31.0827	0.0319981	1	1	1	GRIK2;
Signal Transduction	1	1208	1.28205	0.206101	0.993724	1	1	1	GRM7;
Loss of Nlp from mitotic centrosomes	1	61	1.28205	4.08084	0.219888	1	1	1	ODF2;
Loss of proteins required for interphase microtubule organizationÃÂ from the centrosome	1	61	1.28205	4.08084	0.219888	1	1	1	ODF2;
Mitotic G2-G2/M phases	1	99	1.28205	2.51462	0.33196	1	1	1	ODF2;
G2/M Transition	1	96	1.28205	2.59319	0.323723	1	1	1	ODF2;
Recruitment of mitotic centrosome proteins and complexes	1	70	1.28205	3.55624	0.248002	1	1	1	ODF2;
Centrosome maturation	1	70	1.28205	3.55624	0.248002	1	1	1	ODF2;
Cell Cycle, Mitotic	1	317	1.28205	0.785376	0.727235	1	1	1	ODF2;
Transport of Mature mRNA derived from an Intron-Containing Transcript	1	51	1.28205	4.88085	0.187432	1	1	1	U2AF2;
Transport of Mature Transcript to Cytoplasm	1	55	1.28205	4.52594	0.200571	1	1	1	U2AF2;
mRNA Splicing - Minor Pathway	1	42	1.28205	5.9265	0.157084	1	1	1	SF3B3;
mRNA Splicing - Major Pathway	2	107	2.5641	4.63021	0.0701236	1	1	1	U2AF2; SF3B3;
mRNA Splicing	2	107	2.5641	4.63021	0.0701236	1	1	1	U2AF2; SF3B3;
Processing of Capped Intron-Containing Pre-mRNA	2	138	2.5641	3.59017	0.108032	1	1	1	U2AF2; SF3B3;
mRNA Processing	2	157	2.5641	3.15572	0.133407	1	1	1	U2AF2; SF3B3;
Insulin Synthesis and Processing	2	132	2.5641	3.75334	0.100322	1	1	1	RPS5; KIF5B;
Diabetes pathways	2	216	2.5641	2.29378	0.218435	1	1	1	RPS5; KIF5B;
Signaling by GPCR	1	800	1.28205	0.311211	0.963889	1	1	1	GRM7;
GPCR ligand binding	1	336	1.28205	0.740966	0.747843	1	1	1	GRM7;
Class C/3 (Metabotropic glutamate/pheromone receptors)	1	15	1.28205	16.5871	0.0591659	1	1	1	GRM7;
tRNA Aminoacylation	1	42	1.28205	5.9265	0.157084	1	1	1	AARS;
Cytosolic tRNA aminoacylation	1	24	1.28205	10.3695	0.0929923	1	1	1	AARS;
RNA Polymerase II Transcription	1	101	1.28205	2.46483	0.337397	1	1	1	U2AF2;
Formation and Maturation of mRNA Transcript	2	185	2.5641	2.67812	0.172876	1	1	1	U2AF2; SF3B3;
Gene Expression	4	378	5.12821	2.61499	0.0676004	1	1	1	U2AF2; RPS5; AARS; SF3B3;
Cleavage of Growing Transcript in the Termination Region	1	43	1.28205	5.7887	0.16051	1	1	1	U2AF2;
RNA Polymerase II Transcription Termination	1	43	1.28205	5.7887	0.16051	1	1	1	U2AF2;
Amino acid and oligopeptide SLC transporters	1	48	1.28205	5.18584	0.177438	1	1	1	SLC17A5;
Cholesterol biosynthesis	1	20	1.28205	12.4424	0.0781092	1	1	1	SC5D;
Metabolism	2	823	2.5641	0.602033	0.852542	1	1	1	RPS5; CLNS1A;
L13a-mediated translational silencing of Ceruloplasmin expression	1	102	1.28205	2.44066	0.340098	1	1	1	RPS5;
3' -UTR-mediated translational regulation	1	102	1.28205	2.44066	0.340098	1	1	1	RPS5;
Eukaryotic Translation Termination	1	82	1.28205	3.03587	0.283937	1	1	1	RPS5;
Eukaryotic Translation Elongation	1	85	1.28205	2.92874	0.292653	1	1	1	RPS5;
Peptide chain elongation	1	82	1.28205	3.03587	0.283937	1	1	1	RPS5;
Ribosomal scanning and start codon recognition	1	54	1.28205	4.60974	0.197306	1	1	1	RPS5;
GTP hydrolysis and joining of the 60S ribosomal subunit	1	103	1.28205	2.41697	0.342789	1	1	1	RPS5;
Translation initiation complex formation	1	54	1.28205	4.60974	0.197306	1	1	1	RPS5;
Activation of the mRNA upon binding of the cap-binding complex and eIFs, and subsequent binding to 43S	1	55	1.28205	4.52594	0.200571	1	1	1	RPS5;
Formation of the ternary complex, and subsequently, the 43S complex	1	47	1.28205	5.29615	0.174079	1	1	1	RPS5;
Translation	1	117	1.28205	2.12778	0.379344	1	1	1	RPS5;
Eukaryotic Translation Initiation	1	110	1.28205	2.26318	0.361325	1	1	1	RPS5;
Cap-dependent Translation Initiation	1	110	1.28205	2.26318	0.361325	1	1	1	RPS5;
Formation of a pool of free 40S subunits	1	92	1.28205	2.70592	0.312584	1	1	1	RPS5;
Metabolism of proteins	1	259	1.28205	0.961245	0.653483	1	1	1	RPS5;
Viral mRNA Translation	1	82	1.28205	3.03587	0.283937	1	1	1	RPS5;
Influenza Viral RNA Transcription and Replication	1	98	1.28205	2.54027	0.329226	1	1	1	RPS5;
Influenza Life Cycle	1	135	1.28205	1.8441	0.423408	1	1	1	RPS5;
Influenza Infection	1	140	1.28205	1.77824	0.43509	1	1	1	RPS5;
Nonsense-Mediated Decay	1	104	1.28205	2.39373	0.34547	1	1	1	RPS5;
Metabolism of mRNA	1	234	1.28205	1.06394	0.615916	1	1	1	RPS5;
Metabolism of RNA	2	281	2.5641	1.76321	0.315971	1	1	1	RPS5; CLNS1A;
Nonsense Mediated Decay Enhanced by the Exon Junction Complex	1	104	1.28205	2.39373	0.34547	1	1	1	RPS5;
Nonsense Mediated Decay Independent of the Exon Junction Complex	1	87	1.28205	2.86142	0.298405	1	1	1	RPS5;
Metabolism of non-coding RNA	1	50	1.28205	4.97845	0.184114	1	1	1	CLNS1A;
snRNP Assembly	1	50	1.28205	4.97845	0.184114	1	1	1	CLNS1A;
BMAL1:CLOCK/NPAS2 Activates Gene Expression	1	23	1.28205	10.8202	0.0892939	1	1	1	BHLHE40;
Metabolism of carbohydrates	1	92	1.28205	2.70592	0.312584	1	1	1	PGLS;
Circadian Clock	1	32	1.28205	7.77795	0.122051	1	1	1	BHLHE40;
Pentose phosphate pathway (hexose monophosphate shunt)	1	6	1.28205	41.4263	0.0240946	1	1	1	PGLS;
Cell-cell junction organization	2	45	2.5641	11.0082	0.0143653	1	1	1	PARD3; CDH5;
Cell-Cell communication	2	117	2.5641	4.2345	0.0817976	1	1	1	PARD3; CDH5;
Cell junction organization	2	69	2.5641	7.17982	0.0319856	1	1	1	PARD3; CDH5;
Transmembrane transport of small molecules	2	378	2.5641	1.31076	0.455334	1	1	1	SLC27A1; SLC17A5;
Transport of inorganic cations/anions and amino acids/oligopeptides	1	94	1.28205	2.64836	0.318176	1	1	1	SLC17A5;
SLC-mediated transmembrane transport	2	247	2.5641	2.00591	0.26492	1	1	1	SLC27A1; SLC17A5;
Adherens junctions interactions	1	27	1.28205	9.21777	0.103999	1	1	1	CDH5;
Tight junction interactions	1	18	1.28205	13.8241	0.0705775	1	1	1	PARD3;
Organic anion transporters	1	7	1.28205	35.5167	0.0280543	1	1	1	SLC17A5;
Metabolism of lipids and lipoproteins	1	257	1.28205	0.968725	0.650616	1	1	1	SC5D;
Transport of vitamins, nucleosides, and related molecules	1	30	1.28205	8.2963	0.114873	1	1	1	SLC27A1;
Transport of fatty acids	1	3	1.28205	82.715	0.0121198	1	1	1	SLC27A1;
Transcription	1	178	1.28205	1.39864	0.516557	1	1	1	U2AF2;
Caspase-8 is formed from procaspase-8	1	9	1.28205	27.6329	0.0359261	1	1	1	FAS;
Activation of Pro-Caspase 8	1	9	1.28205	27.6329	0.0359261	1	1	1	FAS;
FasL/ CD95L signaling	1	5	1.28205	49.695	0.020119	1	1	1	FAS;
Death Receptor Signalling	1	13	1.28205	19.137	0.0514814	1	1	1	FAS;
Extrinsic Pathway for Apoptosis	1	13	1.28205	19.137	0.0514814	1	1	1	FAS;
Apoptosis	1	158	1.28205	1.57567	0.475242	1	1	1	FAS;
cholesterol biosynthesis II (via 24,25-dihydrolanosterol)	1	13	1.28205	19.137	0.0514814	1	1	1	SC5D;
cholesterol biosynthesis I	1	13	1.28205	19.137	0.0514814	1	1	1	SC5D;
cholesterol biosynthesis III (via desmosterol)	1	13	1.28205	19.137	0.0514814	1	1	1	SC5D;
superpathway of cholesterol biosynthesis	1	25	1.28205	9.9549	0.0966759	1	1	1	SC5D;
pentose phosphate pathway (oxidative branch)	1	4	1.28205	62.0878	0.0161275	1	1	1	PGLS;
pentose phosphate pathway	1	10	1.28205	24.8723	0.0398384	1	1	1	PGLS;
Validated transcriptional targets of TAp63 isoforms	1	54	1.28205	4.60974	0.197306	1	1	1	FAS;
Circadian rhythm pathway	1	16	1.28205	15.551	0.062985	1	1	1	BHLHE40;
Syndecan-1-mediated signaling events	4	1297	5.12821	0.762132	0.780161	1	1	1	KLK4; MYO6; FAS; BHLHE40;
Regulation of CDC42 activity	1	768	1.28205	0.324178	0.958645	1	1	1	BHLHE40;
Glypican pathway	4	1335	5.12821	0.740439	0.799204	1	1	1	KLK4; MYO6; FAS; BHLHE40;
GMCSF-mediated signaling events	4	1289	5.12821	0.766862	0.77598	1	1	1	KLK4; MYO6; FAS; BHLHE40;
Insulin Pathway	4	1285	5.12821	0.769249	0.773867	1	1	1	KLK4; MYO6; FAS; BHLHE40;
Stabilization and expansion of the E-cadherin adherens junction	1	275	1.28205	0.90532	0.675597	1	1	1	MYO6;
Nectin adhesion pathway	4	1292	5.12821	0.765082	0.777555	1	1	1	KLK4; MYO6; FAS; BHLHE40;
TRAIL signaling pathway	4	1325	5.12821	0.746027	0.794323	1	1	1	KLK4; MYO6; FAS; BHLHE40;
IGF1 pathway	4	1288	5.12821	0.767458	0.775453	1	1	1	KLK4; MYO6; FAS; BHLHE40;
PLK1 signaling events	1	104	1.28205	2.39373	0.34547	1	1	1	ODF2;
HIF-1-alpha transcription factor network	1	66	1.28205	3.77173	0.235632	1	1	1	BHLHE40;
CDC42 signaling events	1	755	1.28205	0.32976	0.956306	1	1	1	BHLHE40;
Signaling events mediated by Hepatocyte Growth Factor Receptor (c-Met)	4	1290	5.12821	0.766268	0.776506	1	1	1	KLK4; MYO6; FAS; BHLHE40;
Glypican 1 network	4	1296	5.12821	0.76272	0.779642	1	1	1	KLK4; MYO6; FAS; BHLHE40;
N-cadherin signaling events	1	251	1.28205	0.991881	0.641874	1	1	1	KIF5B;
PDGF receptor signaling network	4	1290	5.12821	0.766268	0.776506	1	1	1	KLK4; MYO6; FAS; BHLHE40;
Integrin family cell surface interactions	4	1375	5.12821	0.718899	0.817821	1	1	1	KLK4; MYO6; FAS; BHLHE40;
S1P2 pathway	1	26	1.28205	9.57217	0.100345	1	1	1	CDH5;
Internalization of ErbB1	4	1285	5.12821	0.769249	0.773867	1	1	1	KLK4; MYO6; FAS; BHLHE40;
Signaling events mediated by VEGFR1 and VEGFR2	5	1293	6.41026	0.955136	0.608975	1	1	1	KLK4; MYO6; CDH5; FAS; BHLHE40;
Beta1 integrin cell surface interactions	4	1348	5.12821	0.733298	0.805413	1	1	1	KLK4; MYO6; FAS; BHLHE40;
Urokinase-type plasminogen activator (uPA) and uPAR-mediated signaling	4	1285	5.12821	0.769249	0.773867	1	1	1	KLK4; MYO6; FAS; BHLHE40;
Polo-like kinase signaling events in the cell cycle	1	109	1.28205	2.28394	0.358709	1	1	1	ODF2;
IFN-gamma pathway	4	1293	5.12821	0.76449	0.778078	1	1	1	KLK4; MYO6; FAS; BHLHE40;
PAR1-mediated thrombin signaling events	4	1296	5.12821	0.76272	0.779642	1	1	1	KLK4; MYO6; FAS; BHLHE40;
PDGFR-beta signaling pathway	4	1285	5.12821	0.769249	0.773867	1	1	1	KLK4; MYO6; FAS; BHLHE40;
p63 transcription factor network	1	105	1.28205	2.37094	0.348139	1	1	1	FAS;
HIF-2-alpha transcription factor network	1	34	1.28205	7.32055	0.12917	1	1	1	BHLHE40;
E-cadherin signaling in the nascent adherens junction	1	275	1.28205	0.90532	0.675597	1	1	1	MYO6;
Integrin-linked kinase signaling	1	654	1.28205	0.380685	0.93309	1	1	1	BHLHE40;
EGF receptor (ErbB1) signaling pathway	4	1285	5.12821	0.769249	0.773867	1	1	1	KLK4; MYO6; FAS; BHLHE40;
p75(NTR)-mediated signaling	1	178	1.28205	1.39864	0.516557	1	1	1	ZNF274;
Thrombin/protease-activated receptor (PAR) pathway	4	1297	5.12821	0.762132	0.780161	1	1	1	KLK4; MYO6; FAS; BHLHE40;
Class I PI3K signaling events	4	1285	5.12821	0.769249	0.773867	1	1	1	KLK4; MYO6; FAS; BHLHE40;
Arf6 signaling events	4	1285	5.12821	0.769249	0.773867	1	1	1	KLK4; MYO6; FAS; BHLHE40;
Plasma membrane estrogen receptor signaling	4	1298	5.12821	0.761545	0.78068	1	1	1	KLK4; MYO6; FAS; BHLHE40;
FAS (CD95) signaling pathway	1	130	1.28205	1.91502	0.411488	1	1	1	FAS;
C-MYB transcription factor network	1	84	1.28205	2.9636	0.289759	1	1	1	ZFHX3;
p73 transcription factor network	1	78	1.28205	3.19154	0.272151	1	1	1	FAS;
IL3-mediated signaling events	4	1292	5.12821	0.765082	0.777555	1	1	1	KLK4; MYO6; FAS; BHLHE40;
AP-1 transcription factor network	1	621	1.28205	0.400915	0.923132	1	1	1	BHLHE40;
Hypoxic and oxygen homeostasis regulation of HIF-1-alpha	1	80	1.28205	3.11176	0.278068	1	1	1	BHLHE40;
mTOR signaling pathway	4	1285	5.12821	0.769249	0.773867	1	1	1	KLK4; MYO6; FAS; BHLHE40;
ErbB receptor signaling network	4	1308	5.12821	0.755723	0.785812	1	1	1	KLK4; MYO6; FAS; BHLHE40;
Signaling events mediated by focal adhesion kinase	4	1285	5.12821	0.769249	0.773867	1	1	1	KLK4; MYO6; FAS; BHLHE40;
VEGF and VEGFR signaling network	5	1301	6.41026	0.949262	0.614537	1	1	1	KLK4; MYO6; CDH5; FAS; BHLHE40;
Alpha9 beta1 integrin signaling events	4	1302	5.12821	0.759205	0.782744	1	1	1	KLK4; MYO6; FAS; BHLHE40;
Arf6 downstream pathway	4	1285	5.12821	0.769249	0.773867	1	1	1	KLK4; MYO6; FAS; BHLHE40;
HIV-1 Nef: Negative effector of Fas and TNF-alpha	1	35	1.28205	7.11146	0.132709	1	1	1	FAS;
S1P1 pathway	4	1285	5.12821	0.769249	0.773867	1	1	1	KLK4; MYO6; FAS; BHLHE40;
ATM pathway	1	307	1.28205	0.810957	0.71573	1	1	1	FAS;
p53 pathway	1	189	1.28205	1.31724	0.537894	1	1	1	FAS;
ErbB1 downstream signaling	4	1285	5.12821	0.769249	0.773867	1	1	1	KLK4; MYO6; FAS; BHLHE40;
EGFR-dependent Endothelin signaling events	4	1286	5.12821	0.768651	0.774396	1	1	1	KLK4; MYO6; FAS; BHLHE40;
ATR signaling pathway	1	250	1.28205	0.995848	0.640396	1	1	1	FAS;
Arf6 trafficking events	4	1285	5.12821	0.769249	0.773867	1	1	1	KLK4; MYO6; FAS; BHLHE40;
E-cadherin signaling events	1	280	1.28205	0.889154	0.682218	1	1	1	MYO6;
Endothelins	4	1304	5.12821	0.758041	0.78377	1	1	1	KLK4; MYO6; FAS; BHLHE40;
IL5-mediated signaling events	4	1289	5.12821	0.766862	0.77598	1	1	1	KLK4; MYO6; FAS; BHLHE40;
Direct p53 effectors	1	138	1.28205	1.80401	0.430445	1	1	1	FAS;
Sphingosine 1-phosphate (S1P) pathway	5	1308	6.41026	0.944182	0.619367	1	1	1	KLK4; MYO6; CDH5; FAS; BHLHE40;
Proteoglycan syndecan-mediated signaling events	4	1342	5.12821	0.736576	0.802566	1	1	1	KLK4; MYO6; FAS; BHLHE40;
Class I PI3K signaling events mediated by Akt	4	1285	5.12821	0.769249	0.773867	1	1	1	KLK4; MYO6; FAS; BHLHE40;
LKB1 signaling events	4	1305	5.12821	0.75746	0.784282	1	1	1	KLK4; MYO6; FAS; BHLHE40;
Mesenchymal-to-epithelial transition	3	223	3.84615	3.32714	0.0621722	1	1	1	EPS8L1; MYO6; SORL1;

## Sheet: Protein domain
Analysis: Protein domain
Dataset name: Western Pleasure
Number of genes in the dataset: 78
Number of genes in the dataset (which are available in Protein domain database) :68
Number of genes in background: 19230
Is analysis quantitative: No
						Corrected p-values
Protein domain	No. of genes in the dataset	No.of genes in the background dataset	Percentage of genes	Fold enrichment	P-value (Hypergeometric test)	Bonferroni method	BH method	Q-value (Storey-Tibshirani method)
coiled coil region	17	2968	21.7949	1.41276	0.0847662	1	1	1	NOC3L; EPS8L1; CCDC106; TPD52L1; MYO6; GLE1; ODF2; KIF5B; PARD3; AARS; HYDIN; COG4; ZFHX3; PMFBP1; KIAA1217; JAKMIP1; TBCEL;
signal peptide	20	3668	25.641	1.34476	0.0940618	1	1	1	FCAR; KLK4; GRIK2; CD109; PPIC; CDH5; FAS; KLK11; KLK12; IMPG1; GRM7; PRIMA1; DDX28; GLG1; SEMA3E; NTM; OPCML; TECTA; GRIK4; SORL1;
transmembrane domain	15	4771	19.2308	0.775532	0.901683	1	1	1	FCAR; NAT14; GRIK2; SLC27A1; CDH5; SLC35F3; SLC17A5; TTYH1; GRM7; STX12; PRIMA1; GLG1; GRIK4; SC5D; SORL1;
IG	4	340	5.12821	2.90725	0.0494421	1	1	1	FCAR; SEMA3E; NTM; OPCML;
ZnF_U1	1	26	1.28205	9.57217	0.100345	1	1	1	ZFHX3;
ZnF_C2H2	10	799	12.8205	3.08824	0.00141577	1	0.683154	1	ZNF581; ZNF274; ZNF667; ZNF530; ZNF544; ZNF8; ZFHX3; ZNF784; ZNF329; ZNF583;
CA	1	114	1.28205	2.18377	0.371684	1	1	1	CDH5;
S_TKc	1	307	1.28205	0.810957	0.71573	1	1	1	DYRK3;
DEXDc	3	112	3.84615	6.62428	0.0106615	1	1	1	DDX28; DDX19A; DDX19B;
HELICc	3	111	3.84615	6.68396	0.0104058	1	1	1	DDX28; DDX19A; DDX19B;
RRM	1	221	1.28205	1.12652	0.59482	1	1	1	U2AF2;
Sema	1	30	1.28205	8.2963	0.114873	1	1	1	SEMA3E;
PSI	1	44	1.28205	5.65717	0.163923	1	1	1	SEMA3E;
SH3	2	216	2.5641	2.29378	0.218435	1	1	1	EPS8L1; UBASH3B;
LRR	1	233	1.28205	1.0685	0.614332	1	1	1	NLRP5;
IGc2	2	211	2.5641	2.34813	0.210999	1	1	1	NTM; OPCML;
IG_like	1	128	1.28205	1.94494	0.406652	1	1	1	FCAR;
FN3	1	187	1.28205	1.33133	0.534085	1	1	1	SORL1;
FERM_C	1	27	1.28205	9.21777	0.103999	1	1	1	FRMPD2;
KRAB	6	376	7.69231	3.94007	0.0042257	1	0.683154	1	ZNF274; ZNF667; ZNF530; ZNF544; ZNF8; ZNF583;
HLH	1	116	1.28205	2.14613	0.376801	1	1	1	BHLHE40;
EGF	2	208	2.5641	2.382	0.20655	1	1	1	TECTA; SORL1;
EGF_like	2	87	2.5641	5.69451	0.0486917	1	1	1	TECTA; SORL1;
SCAN	1	54	1.28205	4.60974	0.197306	1	1	1	ZNF274;
Tryp_SPc	3	115	3.84615	6.45149	0.0114503	1	1	1	KLK4; KLK11; KLK12;
VWC	1	38	1.28205	6.55017	0.143239	1	1	1	TECTA;
IQ	1	84	1.28205	2.9636	0.289759	1	1	1	MYO6;
CYCLIN	1	37	1.28205	6.72716	0.139743	1	1	1	CCNY;
HOX	1	234	1.28205	1.06394	0.615916	1	1	1	ZFHX3;
PDZ	2	150	2.5641	3.30297	0.123902	1	1	1	FRMPD2; PARD3;
B41	1	51	1.28205	4.88085	0.187432	1	1	1	FRMPD2;
HDc	1	24	1.28205	10.3695	0.0929923	1	1	1	HDDC2;
PYRIN	1	22	1.28205	11.3118	0.0855806	1	1	1	NLRP5;
DEP	1	21	1.28205	11.8502	0.0818524	1	1	1	DEPDC4;
DEATH	1	27	1.28205	9.21777	0.103999	1	1	1	FAS;
DSRM	1	20	1.28205	12.4424	0.0781092	1	1	1	DUS2;
Cog4	1	1	1.28205	246.507	0.00405616	1	0.683154	1	COG4;
PX	1	45	1.28205	5.53148	0.167322	1	1	1	SNX24;
VWD	1	15	1.28205	16.5871	0.0591659	1	1	1	TECTA;
C8	1	12	1.28205	20.7304	0.047616	1	1	1	TECTA;
MYSc	1	38	1.28205	6.55017	0.143239	1	1	1	MYO6;
LDLa	1	47	1.28205	5.29615	0.174079	1	1	1	SORL1;
TNFR	1	26	1.28205	9.57217	0.100345	1	1	1	FAS;
PIPKc	1	8	1.28205	31.0827	0.0319981	1	1	1	PIP4K2A;
t_SNARE	1	22	1.28205	11.3118	0.0855806	1	1	1	STX12;
ZP	1	15	1.28205	16.5871	0.0591659	1	1	1	TECTA;
Lig_chan-Glu_bd	2	18	2.5641	27.5113	0.00238258	1	0.683154	1	GRIK2; GRIK4;
PBPe	2	18	2.5641	27.5113	0.00238258	1	0.683154	1	GRIK2; GRIK4;
LY	1	15	1.28205	16.5871	0.0591659	1	1	1	SORL1;
KISc	1	44	1.28205	5.65717	0.163923	1	1	1	KIF5B;
SEA	1	14	1.28205	17.771	0.0553313	1	1	1	IMPG1;
SynN	1	10	1.28205	24.8723	0.0398384	1	1	1	STX12;
UBA	1	32	1.28205	7.77795	0.122051	1	1	1	UBASH3B;
tRNA_SAD	1	7	1.28205	35.5167	0.0280543	1	1	1	AARS;
GIDA_assoc_3	1	1	1.28205	246.507	0.00405616	1	0.683154	1	MTO1;
ORANGE	1	10	1.28205	24.8723	0.0398384	1	1	1	BHLHE40;
KIND	1	5	1.28205	49.695	0.020119	1	1	1	FRMPD2;
A2M_N_2	1	9	1.28205	27.6329	0.0359261	1	1	1	CD109;
A2M	1	9	1.28205	27.6329	0.0359261	1	1	1	CD109;
A2M_recep	1	9	1.28205	27.6329	0.0359261	1	1	1	CD109;
VPS10	1	5	1.28205	49.695	0.020119	1	1	1	SORL1;
NIDO	1	5	1.28205	49.695	0.020119	1	1	1	TECTA;

## Sheet: Site of expression
Analysis: Site of expression
Dataset name: Western Pleasure
Number of genes in the dataset: 78
Number of genes in the dataset (which are available in Site of expression database) :77
Number of genes in background: 19230
Is analysis quantitative: No
						Corrected p-values
Site of expression	No. of genes in the dataset	No.of genes in the background dataset	Percentage of genes	Fold enrichment	P-value (Hypergeometric test)	Bonferroni method	BH method	Q-value (Storey-Tibshirani method)
T cells	7	1726	8.97436	1.00116	0.557771	1	1	1	NOC3L; U2AF2; RPS5; CD109; PIP4K2A; DDX19A; SF3B3;
Monocyte	12	2842	15.3846	1.04171	0.488491	1	1	1	U2AF2; RPS5; MYO6; PGLS; KIF5B; PIP4K2A; AARS; FAS; CCNY; SF3B3; GLG1; CLNS1A;
MDA468	4	760	5.12821	1.30063	0.371653	1	1	1	CD109; MYO6; PGLS; AARS;
Small intestine	31	8360	39.7436	0.914375	0.781734	1	1	1	FRMPD2; ZNF274; FCAR; U2AF2; TPD52L1; ZNF544; ZNF8; MTO1; GRIK2; CD109; MYO6; SLC27A1; KIF5B; PARD3; VAC14; CDH5; PMFBP1; FAS; HDDC2; KLK12; TTYH1; BHLHE40; KIAA1217; CCNY; DDX28; GLG1; JAKMIP1; SEMA3E; CLNS1A; SC5D; SORL1;
Breast cancer	26	7467	33.3333	0.858663	0.868007	1	1	1	FRMPD2; ZNF274; U2AF2; TPD52L1; ZNF544; ZNF8; MTO1; GRIK2; CD109; MYO6; SLC27A1; ODF2; KIF5B; PARD3; VAC14; CDH5; PMFBP1; FAS; HDDC2; BHLHE40; KIAA1217; CCNY; GLG1; SEMA3E; CLNS1A; SORL1;
Thyroid cancer	29	7281	37.1795	0.982167	0.591905	1	1	1	FRMPD2; ZNF274; FCAR; U2AF2; TPD52L1; ZNF544; ZNF8; MTO1; GRIK2; CD109; MYO6; SLC27A1; ODF2; KIF5B; PARD3; VAC14; CDH5; PMFBP1; FAS; HDDC2; BHLHE40; KIAA1217; CCNY; GLG1; SEMA3E; NTM; CLNS1A; TECTA; SORL1;
Colon	30	8429	38.4615	0.877645	0.858404	1	1	1	FRMPD2; ZNF274; FCAR; U2AF2; TPD52L1; ZNF544; ZNF8; RPS5; MTO1; GRIK2; CD109; MYO6; KIF5B; PARD3; VAC14; CDH5; PMFBP1; FAS; KLK11; HDDC2; KLK12; BHLHE40; KIAA1217; CCNY; DDX28; GLG1; JAKMIP1; SEMA3E; CLNS1A; SORL1;
Parathyroid gland	24	5997	30.7692	0.986931	0.574183	1	1	1	FRMPD2; U2AF2; TPD52L1; ZNF544; ZNF8; MTO1; GRIK2; CD109; MYO6; SLC27A1; KIF5B; VAC14; CDH5; PMFBP1; FAS; HDDC2; KLK12; KIAA1217; CCNY; GLG1; SEMA3E; NTM; CLNS1A; SORL1;
Cervix, uterine	24	6391	30.7692	0.926087	0.7171	1	1	1	FRMPD2; ZNF274; FCAR; U2AF2; TPD52L1; ZNF544; MTO1; GRIK2; CD109; MYO6; KIF5B; CDH5; PMFBP1; FAS; KLK11; HDDC2; TTYH1; BHLHE40; KIAA1217; CCNY; GLG1; SEMA3E; CLNS1A; SORL1;
Spleen	26	7887	33.3333	0.812938	0.934253	1	1	1	FRMPD2; ZNF274; FCAR; U2AF2; TPD52L1; ZNF530; ZNF544; MTO1; GRIK2; CD109; MYO6; KIAA1191; KIF5B; PARD3; VAC14; CDH5; KLK11; LENG8; BHLHE40; KIAA1217; DDX28; GLG1; JAKMIP1; SC5D; UBASH3B; SORL1;
HUVEC	57	13061	73.0769	1.07598	0.197069	1	1	1	FRMPD2; NOC3L; EPS8L1; ZNF581; CCDC106; ZNF274; FCAR; U2AF2; TPD52L1; ZNF667; ZNF530; ZNF544; ZNF8; MTO1; GRIK2; CD109; MYO6; NLRP5; KIAA1191; SLC27A1; UNC79; GLE1; ODF2; KIF5B; PIP4K2A; PARD3; AARS; HYDIN; VAC14; COG4; CDH5; ZFHX3; DUS2; PMFBP1; DYRK3; FAS; ZNF784; ZNF329; ZNF583; LENG8; SIMC1; BHLHE40; GRM7; DEPDC4; KIAA1217; CCNY; DDX28; DDX19A; CFDP1; GLG1; JAKMIP1; SEMA3E; TBCEL; TECTA; GRIK…
Tonsils	23	7274	29.4872	0.77978	0.95142	1	1	1	FRMPD2; ZNF274; FCAR; U2AF2; TPD52L1; ZNF544; MTO1; GRIK2; CD109; MYO6; ODF2; VAC14; CDH5; PMFBP1; FAS; HDDC2; KLK12; BHLHE40; CCNY; GLG1; SEMA3E; CLNS1A; TECTA;
Jurkat A3	23	4200	29.4872	1.3505	0.0702248	1	1	1	NOC3L; EPS8L1; FCAR; RPS5; NAT14; MTO1; CD109; MYO6; PGLS; GLE1; KIF5B; VAC14; COG4; DUS2; FAS; ZNF583; HDDC2; CCNY; DDX28; CFDP1; JAKMIP1; CLNS1A; SORL1;
Rectum	23	7113	29.4872	0.79743	0.934219	1	1	1	FRMPD2; ZNF274; U2AF2; TPD52L1; ZNF544; ZNF8; MTO1; GRIK2; CD109; MYO6; KIF5B; PARD3; CDH5; PMFBP1; FAS; HDDC2; KLK12; KIAA1217; CCNY; GLG1; SEMA3E; CLNS1A; SORL1;
Liver	54	11680	69.2308	1.13988	0.0758773	1	1	1	FRMPD2; CCDC106; ZNF274; U2AF2; TPD52L1; ZNF667; ZNF530; ZNF544; ZNF8; RPS5; NAT14; MTO1; GRIK2; CD109; MYO6; KIAA1191; PPIC; PGLS; SLC27A1; UNC79; ODF2; KIF5B; PIP4K2A; PARD3; AARS; HYDIN; VAC14; COG4; CDH5; PMFBP1; SLC35F3; FAS; ZNF329; KLK11; ZNF583; HDDC2; KLK12; LENG8; BHLHE40; GRM7; STX12; KIAA1217; CCNY; DDX28; DDX19A; SF3B3; CFDP1; GLG1; DDX19B; JAKMIP1; SEMA3E; SC5D; UBASH3B; SORL1;
CNS	2	74	2.5641	6.69476	0.0363529	1	1	1	FAS; SORL1;
CD4	9	1901	11.5385	1.16834	0.36476	1	1	1	U2AF2; RPS5; PGLS; KIF5B; PIP4K2A; AARS; CDH5; SF3B3; GLG1;
Skeletal muscles	35	9060	44.8718	0.952561	0.694666	1	1	1	FRMPD2; ZNF274; FCAR; U2AF2; ZNF530; ZNF544; ZNF8; RPS5; MTO1; GRIK2; CD109; MYO6; KIAA1191; PPIC; SLC27A1; ODF2; KIF5B; PIP4K2A; PARD3; AARS; HYDIN; VAC14; CDH5; PMFBP1; KLK11; LENG8; TTYH1; KIAA1217; DDX28; SF3B3; GLG1; SEMA3E; SC5D; UBASH3B; SORL1;
H293	34	6792	43.5897	1.23435	0.0802918	1	1	1	NOC3L; U2AF2; TPD52L1; ZNF8; RPS5; NAT14; CD109; MYO6; KIAA1191; PPIC; PGLS; GLE1; ODF2; KIF5B; PIP4K2A; PARD3; AARS; VAC14; COG4; CDH5; ZFHX3; DUS2; FAS; LENG8; SIMC1; STX12; DDX28; SF3B3; CFDP1; GLG1; DDX19B; TBCEL; CLNS1A; SORL1;
Prostate	30	7923	38.4615	0.933695	0.7268	1	1	1	FRMPD2; ZNF274; FCAR; U2AF2; TPD52L1; ZNF544; KLK4; MTO1; GRIK2; CD109; MYO6; SLC27A1; ODF2; KIF5B; HYDIN; VAC14; CDH5; PMFBP1; FAS; KLK11; HDDC2; KLK12; BHLHE40; KIAA1217; CCNY; DDX28; GLG1; SEMA3E; SC5D; SORL1;
Jurkat	15	2869	19.2308	1.28967	0.178995	1	1	1	U2AF2; RPS5; CD109; PGLS; KIF5B; PARD3; AARS; COG4; HDDC2; STX12; DDX28; SF3B3; GLG1; CLNS1A; UBASH3B;
Bone marrow	29	7808	37.1795	0.915876	0.766926	1	1	1	FRMPD2; ZNF274; FCAR; U2AF2; TPD52L1; ZNF544; ZNF8; RPS5; MTO1; GRIK2; CD109; PGLS; KIF5B; PARD3; AARS; CDH5; PMFBP1; DYRK3; BHLHE40; STX12; KIAA1217; CCNY; SF3B3; GLG1; DDX19B; SEMA3E; CLNS1A; UBASH3B; SORL1;
Lateral ventricle	25	6620	32.0513	0.931289	0.70975	1	1	1	FRMPD2; ZNF274; FCAR; U2AF2; TPD52L1; ZNF544; ZNF8; MTO1; GRIK2; CD109; SLC27A1; ODF2; KIF5B; PARD3; VAC14; CDH5; PMFBP1; HDDC2; BHLHE40; KIAA1217; CCNY; GLG1; SEMA3E; NTM; SORL1;
Colorectal cancer	28	7513	35.8974	0.919027	0.753876	1	1	1	FRMPD2; ZNF274; U2AF2; TPD52L1; ZNF544; ZNF8; MTO1; GRIK2; CD109; MYO6; SLC27A1; ODF2; KIF5B; PARD3; VAC14; CDH5; PMFBP1; FAS; HDDC2; BHLHE40; KIAA1217; CCNY; GLG1; SEMA3E; NTM; CLNS1A; TECTA; SORL1;
Gall bladder	28	7295	35.8974	0.946491	0.684755	1	1	1	FRMPD2; ZNF274; FCAR; U2AF2; TPD52L1; ZNF544; ZNF8; MTO1; GRIK2; CD109; MYO6; ODF2; KIF5B; PARD3; VAC14; CDH5; PMFBP1; FAS; HDDC2; KLK12; BHLHE40; KIAA1217; CCNY; GLG1; SEMA3E; NTM; CLNS1A; SORL1;
Plasma	54	11971	69.2308	1.11217	0.122832	1	1	1	FRMPD2; CCDC106; ZNF274; FCAR; U2AF2; RPS5; KLK4; NAT14; CD109; MYO6; NLRP5; KIAA1191; PPIC; PGLS; SLC27A1; UNC79; GLE1; ODF2; KIF5B; PIP4K2A; PARD3; AARS; HYDIN; VAC14; COG4; CDH5; ZFHX3; DUS2; PMFBP1; DYRK3; FAS; ZNF784; KLK11; HDDC2; KLK12; LENG8; TTYH1; SIMC1; KIAA1217; DDX28; DDX19A; SF3B3; CFDP1; GLG1; DDX19B; JAKMIP1; SEMA3E; NTM; OPCML; TBCEL; CLNS1A; TECTA; UBASH3B; SORL1;
Malignant carcinoid	26	7081	33.3333	0.905471	0.774303	1	1	1	FRMPD2; ZNF274; U2AF2; TPD52L1; ZNF544; ZNF8; MTO1; GRIK2; CD109; MYO6; ODF2; KIF5B; PARD3; VAC14; CDH5; PMFBP1; FAS; HDDC2; TTYH1; BHLHE40; KIAA1217; CCNY; GLG1; SEMA3E; CLNS1A; SORL1;
Ascites cancer cell	20	3509	25.641	1.4057	0.0652286	1	1	1	EPS8L1; U2AF2; RPS5; NAT14; CD109; MYO6; PGLS; SLC27A1; KIF5B; PIP4K2A; AARS; KLK11; STX12; KIAA1217; CCNY; DDX19A; SF3B3; GLG1; DDX19B; SORL1;
Endometrial cancer	28	7460	35.8974	0.925556	0.737892	1	1	1	FRMPD2; ZNF274; U2AF2; TPD52L1; ZNF544; ZNF8; MTO1; GRIK2; CD109; MYO6; ODF2; KIF5B; PARD3; VAC14; CDH5; PMFBP1; FAS; HDDC2; TTYH1; BHLHE40; KIAA1217; CCNY; GLG1; SEMA3E; NTM; CLNS1A; TECTA; SORL1;
Lung cancer	29	7435	37.1795	0.961824	0.647404	1	1	1	FRMPD2; ZNF274; FCAR; U2AF2; TPD52L1; ZNF544; ZNF8; MTO1; GRIK2; CD109; MYO6; ODF2; KIF5B; PARD3; CDH5; PMFBP1; FAS; HDDC2; KLK12; TTYH1; BHLHE40; KIAA1217; CCNY; GLG1; SEMA3E; NTM; CLNS1A; TECTA; SORL1;
HCT116	15	2651	19.2308	1.39572	0.111621	1	1	1	NOC3L; U2AF2; RPS5; MYO6; PPIC; PGLS; KIF5B; AARS; HDDC2; LENG8; DDX19A; SF3B3; GLG1; DDX19B; CLNS1A;
PC3	5	1294	6.41026	0.954398	0.609672	1	1	1	U2AF2; RPS5; CD109; PGLS; AARS;
MicroProt	3	440	3.84615	1.68629	0.264474	1	1	1	CD109; CDH5; SORL1;
Epididymis	28	7090	35.8974	0.973858	0.612633	1	1	1	FRMPD2; ZNF274; FCAR; U2AF2; TPD52L1; ZNF544; ZNF8; MTO1; GRIK2; CD109; MYO6; KIF5B; PARD3; VAC14; CDH5; PMFBP1; FAS; KLK11; HDDC2; KLK12; BHLHE40; KIAA1217; CCNY; GLG1; SEMA3E; NTM; CLNS1A; SORL1;
Cerebellum	34	7633	43.5897	1.09835	0.276375	1	1	1	FRMPD2; ZNF274; FCAR; U2AF2; ZNF530; ZNF544; ZNF8; MTO1; GRIK2; CD109; KIAA1191; UNC79; KIF5B; PARD3; HYDIN; VAC14; CDH5; PMFBP1; FAS; KLK11; HDDC2; LENG8; TTYH1; BHLHE40; GRM7; KIAA1217; CCNY; GLG1; SEMA3E; NTM; CLNS1A; SC5D; UBASH3B; SORL1;
Nasopharynx	28	6904	35.8974	1.00009	0.543027	1	1	1	FRMPD2; ZNF274; FCAR; U2AF2; TPD52L1; ZNF544; ZNF8; MTO1; GRIK2; CD109; MYO6; SLC27A1; ODF2; KIF5B; PARD3; CDH5; PMFBP1; HDDC2; TTYH1; BHLHE40; KIAA1217; CCNY; GLG1; SEMA3E; NTM; CLNS1A; TECTA; SORL1;
global_SCX_fractionated	13	2476	16.6667	1.29525	0.198753	1	1	1	NOC3L; U2AF2; RPS5; CD109; MYO6; PGLS; KIF5B; AARS; VAC14; SF3B3; GLG1; DDX19B; CLNS1A;
Hippocampus	30	7355	38.4615	1.0058	0.527344	1	1	1	FRMPD2; ZNF274; FCAR; U2AF2; ZNF530; ZNF544; ZNF8; MTO1; GRIK2; CD109; KIAA1191; SLC27A1; UNC79; ODF2; KIF5B; HYDIN; CDH5; PMFBP1; HDDC2; LENG8; BHLHE40; GRM7; KIAA1217; CCNY; GLG1; SEMA3E; NTM; GRIK4; UBASH3B; SORL1;
HeLa	31	5789	39.7436	1.32046	0.0437108	1	1	1	FRMPD2; NOC3L; ZNF581; U2AF2; ZNF667; ZNF530; RPS5; GRIK2; CD109; NLRP5; KIAA1191; PGLS; UNC79; KIF5B; PIP4K2A; PARD3; AARS; VAC14; ZFHX3; HDDC2; LENG8; SIMC1; KIAA1217; DDX19A; SF3B3; CFDP1; JAKMIP1; NTM; OPCML; CLNS1A; TECTA;
Malignant lymphoma	21	6586	26.9231	0.786381	0.933705	1	1	1	FRMPD2; ZNF274; FCAR; U2AF2; TPD52L1; ZNF544; ZNF8; MTO1; GRIK2; MYO6; ODF2; KIF5B; CDH5; PMFBP1; HDDC2; BHLHE40; KIAA1217; GLG1; SEMA3E; CLNS1A; SORL1;
Prostate cancer	26	7214	33.3333	0.888777	0.810308	1	1	1	FRMPD2; ZNF274; U2AF2; TPD52L1; ZNF544; ZNF8; MTO1; GRIK2; MYO6; SLC27A1; ODF2; KIF5B; PARD3; VAC14; CDH5; PMFBP1; FAS; KLK11; HDDC2; BHLHE40; KIAA1217; CCNY; GLG1; SEMA3E; CLNS1A; SORL1;
Skin	32	7292	41.0256	1.0821	0.323958	1	1	1	FRMPD2; ZNF274; FCAR; U2AF2; TPD52L1; ZNF544; ZNF8; KLK4; NAT14; MTO1; GRIK2; CD109; MYO6; PGLS; KIF5B; PARD3; VAC14; CDH5; PMFBP1; KLK11; HDDC2; BHLHE40; KIAA1217; CCNY; DDX19A; CFDP1; GLG1; SEMA3E; NTM; CLNS1A; TECTA; SORL1;
Placenta	47	10894	60.2564	1.06373	0.299688	1	1	1	FRMPD2; EPS8L1; ZNF274; FCAR; U2AF2; TPD52L1; ZNF544; ZNF8; RPS5; NAT14; MTO1; GRIK2; CD109; MYO6; KIAA1191; PGLS; SLC27A1; GLE1; KIF5B; PIP4K2A; PARD3; AARS; VAC14; CDH5; DUS2; PMFBP1; FAS; KLK11; HDDC2; KLK12; SLC17A5; TTYH1; BHLHE40; GRM7; STX12; KIAA1217; CCNY; DDX28; SF3B3; CFDP1; GLG1; SEMA3E; NTM; CLNS1A; TECTA; SC5D; SORL1;
Lung	41	9992	52.5641	1.01173	0.503231	1	1	1	FRMPD2; ZNF274; FCAR; U2AF2; ZNF530; ZNF544; MTO1; GRIK2; CD109; MYO6; KIAA1191; PPIC; SLC27A1; ODF2; KIF5B; PIP4K2A; PARD3; HYDIN; VAC14; CDH5; PMFBP1; FAS; KLK11; HDDC2; KLK12; LENG8; TTYH1; BHLHE40; KIAA1217; CCNY; DDX28; CFDP1; GLG1; JAKMIP1; SEMA3E; NTM; CLNS1A; TECTA; SC5D; UBASH3B; SORL1;
Cerebral cortex	25	7099	32.0513	0.868451	0.843765	1	1	1	FRMPD2; ZNF274; FCAR; U2AF2; ZNF544; ZNF8; MTO1; GRIK2; CD109; SLC27A1; ODF2; KIF5B; VAC14; CDH5; PMFBP1; HDDC2; BHLHE40; GRM7; KIAA1217; CCNY; GLG1; SEMA3E; NTM; CLNS1A; SORL1;
Ovarian cancer	30	7644	38.4615	0.967774	0.633708	1	1	1	FRMPD2; ZNF274; FCAR; U2AF2; TPD52L1; ZNF544; ZNF8; MTO1; GRIK2; CD109; MYO6; SLC27A1; ODF2; KIF5B; PARD3; VAC14; CDH5; PMFBP1; FAS; KLK11; HDDC2; BHLHE40; KIAA1217; CCNY; GLG1; SEMA3E; NTM; CLNS1A; TECTA; SORL1;
Kidney	39	10256	50	0.93762	0.759873	1	1	1	FRMPD2; ZNF274; FCAR; U2AF2; TPD52L1; ZNF530; ZNF544; ZNF8; MTO1; GRIK2; CD109; MYO6; KIAA1191; PPIC; KIF5B; PIP4K2A; PARD3; HYDIN; VAC14; CDH5; PMFBP1; FAS; KLK11; HDDC2; LENG8; TTYH1; BHLHE40; KIAA1217; CCNY; DDX28; CFDP1; GLG1; JAKMIP1; SEMA3E; CLNS1A; TECTA; SC5D; UBASH3B; SORL1;
H1688	6	1007	7.69231	1.47119	0.223883	1	1	1	U2AF2; MYO6; PGLS; KIF5B; KLK11; SF3B3;
Sy5y	12	2490	15.3846	1.18897	0.306773	1	1	1	U2AF2; RPS5; PGLS; KIF5B; AARS; STX12; CCNY; DDX19A; SF3B3; GLG1; DDX19B; CLNS1A;
Duodenum	27	7275	34.6154	0.915209	0.757621	1	1	1	FRMPD2; ZNF274; U2AF2; TPD52L1; ZNF544; ZNF8; MTO1; GRIK2; CD109; MYO6; KIF5B; PARD3; VAC14; CDH5; PMFBP1; FAS; HDDC2; KLK12; TTYH1; BHLHE40; KIAA1217; CCNY; GLG1; SEMA3E; CLNS1A; TECTA; SORL1;
Bronchus	26	6923	33.3333	0.926136	0.726631	1	1	1	FRMPD2; ZNF274; FCAR; U2AF2; TPD52L1; ZNF544; ZNF8; MTO1; GRIK2; CD109; MYO6; SLC27A1; ODF2; CDH5; PMFBP1; FAS; HDDC2; TTYH1; BHLHE40; KIAA1217; CCNY; GLG1; SEMA3E; CLNS1A; TECTA; SORL1;
Brain	36	7290	46.1538	1.21765	0.0838003	1	1	1	ZNF274; U2AF2; ZNF530; RPS5; NAT14; MTO1; CD109; MYO6; KIAA1191; PPIC; PGLS; SLC27A1; UNC79; KIF5B; PIP4K2A; PARD3; AARS; HYDIN; VAC14; KLK11; KLK12; LENG8; BHLHE40; GRM7; STX12; KIAA1217; DDX28; SF3B3; CFDP1; JAKMIP1; SEMA3E; NTM; OPCML; SC5D; UBASH3B; SORL1;
Stomach	29	8044	37.1795	0.889005	0.828615	1	1	1	FRMPD2; ZNF274; U2AF2; TPD52L1; ZNF544; ZNF8; MTO1; GRIK2; CD109; MYO6; SLC27A1; KIF5B; PARD3; VAC14; CDH5; PMFBP1; FAS; KLK11; HDDC2; KLK12; TTYH1; BHLHE40; KIAA1217; CCNY; GLG1; SEMA3E; CLNS1A; SC5D; SORL1;
Pancreas	42	9936	53.8462	1.04225	0.393368	1	1	1	FRMPD2; ZNF274; FCAR; U2AF2; TPD52L1; ZNF530; ZNF544; RPS5; NAT14; MTO1; GRIK2; CD109; MYO6; KIAA1191; PPIC; PGLS; SLC27A1; UNC79; ODF2; KIF5B; PIP4K2A; PARD3; AARS; HYDIN; VAC14; CDH5; PMFBP1; FAS; KLK11; KLK12; LENG8; BHLHE40; KIAA1217; CCNY; DDX28; SF3B3; CFDP1; GLG1; SEMA3E; CLNS1A; SC5D; SORL1;
Lymph nodes	22	6700	28.2051	0.809793	0.913644	1	1	1	FRMPD2; ZNF274; FCAR; U2AF2; TPD52L1; ZNF544; MTO1; GRIK2; CD109; SLC27A1; ODF2; KIF5B; VAC14; CDH5; PMFBP1; FAS; HDDC2; BHLHE40; KIAA1217; CCNY; GLG1; SORL1;
H358	15	1489	19.2308	2.48492	0.000840162	0.712457	0.356229	1	U2AF2; RPS5; CD109; PGLS; KIF5B; AARS; CDH5; KIAA1217; DDX19A; SF3B3; CFDP1; GLG1; DDX19B; SEMA3E; SORL1;
Fallopian tubes	25	6677	32.0513	0.923338	0.728266	1	1	1	FRMPD2; ZNF274; FCAR; U2AF2; TPD52L1; ZNF544; ZNF8; MTO1; GRIK2; MYO6; ODF2; KIF5B; PARD3; VAC14; CDH5; PMFBP1; FAS; HDDC2; BHLHE40; KIAA1217; CCNY; GLG1; SEMA3E; CLNS1A; SORL1;
Head & neck cancer	25	7062	32.0513	0.873001	0.835228	1	1	1	FRMPD2; ZNF274; FCAR; U2AF2; TPD52L1; ZNF544; ZNF8; MTO1; GRIK2; CD109; MYO6; ODF2; KIF5B; CDH5; PMFBP1; HDDC2; TTYH1; BHLHE40; KIAA1217; CCNY; GLG1; SEMA3E; CLNS1A; TECTA; SORL1;
Pancreatic cancer	35	8316	44.8718	1.03778	0.428223	1	1	1	FRMPD2; EPS8L1; ZNF274; FCAR; U2AF2; TPD52L1; ZNF544; ZNF8; RPS5; MTO1; GRIK2; CD109; MYO6; PGLS; SLC27A1; ODF2; KIF5B; PARD3; AARS; VAC14; CDH5; PMFBP1; FAS; KLK11; HDDC2; BHLHE40; KIAA1217; CCNY; SF3B3; GLG1; SEMA3E; NTM; CLNS1A; TECTA; SORL1;
BT474	1	558	1.28205	0.446178	0.899892	1	1	1	U2AF2;
Seminal vesicle	25	6620	32.0513	0.931289	0.70975	1	1	1	FRMPD2; ZNF274; FCAR; U2AF2; TPD52L1; ZNF544; ZNF8; MTO1; GRIK2; MYO6; SLC27A1; KIF5B; VAC14; CDH5; PMFBP1; FAS; HDDC2; BHLHE40; KIAA1217; CCNY; GLG1; SEMA3E; CLNS1A; TECTA; SORL1;
Urinary bladder	23	7054	29.4872	0.804099	0.926819	1	1	1	FRMPD2; U2AF2; TPD52L1; ZNF544; ZNF8; MTO1; GRIK2; CD109; MYO6; SLC27A1; KIF5B; PARD3; VAC14; CDH5; PMFBP1; HDDC2; BHLHE40; KIAA1217; CCNY; GLG1; SEMA3E; CLNS1A; SORL1;
K-562	15	2513	19.2308	1.47237	0.0786036	1	1	1	U2AF2; TPD52L1; RPS5; PGLS; KIF5B; PIP4K2A; AARS; VAC14; COG4; HDDC2; DDX19A; SF3B3; DDX19B; CLNS1A; UBASH3B;
Salivary glands	27	6607	34.6154	1.00774	0.523519	1	1	1	FRMPD2; FCAR; U2AF2; TPD52L1; ZNF544; KLK4; MTO1; GRIK2; CD109; MYO6; KIF5B; PARD3; VAC14; CDH5; PMFBP1; KLK11; HDDC2; KLK12; BHLHE40; GRM7; KIAA1217; CCNY; GLG1; SEMA3E; NTM; CLNS1A; SORL1;
Testis	48	10269	61.5385	1.15248	0.0912646	1	1	1	FRMPD2; ZNF274; FCAR; U2AF2; TPD52L1; ZNF530; ZNF544; ZNF8; RPS5; KLK4; MTO1; GRIK2; CD109; MYO6; KIAA1191; PGLS; SLC27A1; ODF2; KIF5B; PARD3; HYDIN; VAC14; COG4; CDH5; PMFBP1; DYRK3; FAS; KLK11; HDDC2; LENG8; TTYH1; BHLHE40; GRM7; STX12; KIAA1217; CCNY; DDX19A; SF3B3; GLG1; DDX19B; SEMA3E; NTM; TBCEL; CLNS1A; TECTA; SC5D; UBASH3B; SORL1;
MDA231	1	336	1.28205	0.740966	0.747843	1	1	1	GLG1;
Urothelial cancer	28	7521	35.8974	0.91805	0.75624	1	1	1	FRMPD2; ZNF274; FCAR; U2AF2; TPD52L1; ZNF544; ZNF8; MTO1; GRIK2; CD109; MYO6; ODF2; KIF5B; PARD3; VAC14; CDH5; PMFBP1; HDDC2; TTYH1; BHLHE40; KIAA1217; CCNY; GLG1; SEMA3E; NTM; CLNS1A; TECTA; SORL1;
R	9	1948	11.5385	1.14015	0.392744	1	1	1	NOC3L; U2AF2; PGLS; KIF5B; PIP4K2A; AARS; SF3B3; DDX19B; CLNS1A;
Soft tissue	25	6969	32.0513	0.884651	0.812407	1	1	1	FRMPD2; ZNF274; FCAR; U2AF2; TPD52L1; ZNF544; ZNF8; MTO1; GRIK2; CD109; MYO6; KIF5B; PARD3; VAC14; CDH5; PMFBP1; FAS; BHLHE40; KIAA1217; CCNY; GLG1; SEMA3E; CLNS1A; TECTA; SORL1;
Testis cancer	28	7248	35.8974	0.952628	0.668761	1	1	1	FRMPD2; ZNF274; FCAR; U2AF2; TPD52L1; ZNF544; ZNF8; MTO1; GRIK2; CD109; MYO6; ODF2; KIF5B; PARD3; VAC14; CDH5; PMFBP1; HDDC2; TTYH1; BHLHE40; KIAA1217; CCNY; GLG1; SEMA3E; NTM; CLNS1A; TECTA; SORL1;
Neutrophil	8	2031	10.2564	0.972187	0.589491	1	1	1	U2AF2; RPS5; CD109; PGLS; PIP4K2A; CDH5; SF3B3; GLG1;
CD8	12	3327	15.3846	0.889853	0.717908	1	1	1	U2AF2; TPD52L1; RPS5; PGLS; KIF5B; PIP4K2A; AARS; DDX19A; SF3B3; GLG1; DDX19B; CLNS1A;
Stomach cancer	27	7399	34.6154	0.899871	0.792645	1	1	1	FRMPD2; ZNF274; FCAR; U2AF2; TPD52L1; ZNF544; ZNF8; MTO1; GRIK2; CD109; MYO6; ODF2; KIF5B; PARD3; VAC14; CDH5; PMFBP1; FAS; HDDC2; BHLHE40; KIAA1217; CCNY; GLG1; SEMA3E; NTM; CLNS1A; SORL1;
Skin cancer	29	7029	37.1795	1.01738	0.496806	1	1	1	FRMPD2; ZNF274; FCAR; U2AF2; TPD52L1; ZNF544; ZNF8; MTO1; GRIK2; CD109; MYO6; SLC27A1; ODF2; KIF5B; PARD3; CDH5; PMFBP1; KLK11; HDDC2; TTYH1; BHLHE40; KIAA1217; CCNY; GLG1; SEMA3E; NTM; CLNS1A; TECTA; SORL1;
Adrenal glands	30	7554	38.4615	0.979304	0.601376	1	1	1	FRMPD2; ZNF274; FCAR; U2AF2; TPD52L1; ZNF544; ZNF8; KLK4; MTO1; GRIK2; CD109; MYO6; SLC27A1; KIF5B; VAC14; CDH5; PMFBP1; FAS; HDDC2; KLK12; BHLHE40; GRM7; KIAA1217; CCNY; GLG1; SEMA3E; NTM; CLNS1A; SC5D; SORL1;
TOV112D	10	1276	12.8205	1.93379	0.0330334	1	1	1	U2AF2; RPS5; PPIC; PGLS; KIF5B; AARS; SF3B3; CFDP1; DDX19B; CLNS1A;
LNCaP	7	1455	8.97436	1.18763	0.377138	1	1	1	U2AF2; MYO6; PGLS; KIF5B; AARS; CFDP1; GLG1;
Corpus, uterine	28	6997	35.8974	0.986802	0.578201	1	1	1	FRMPD2; ZNF274; FCAR; U2AF2; TPD52L1; ZNF544; ZNF8; MTO1; GRIK2; MYO6; SLC27A1; ODF2; KIF5B; PARD3; VAC14; CDH5; PMFBP1; FAS; HDDC2; BHLHE40; KIAA1217; CCNY; GLG1; SEMA3E; NTM; CLNS1A; TECTA; SORL1;
Appendix	25	7004	32.0513	0.88023	0.821225	1	1	1	FRMPD2; ZNF274; FCAR; U2AF2; TPD52L1; ZNF544; ZNF8; MTO1; GRIK2; CD109; MYO6; KIF5B; PARD3; VAC14; CDH5; PMFBP1; FAS; HDDC2; BHLHE40; KIAA1217; CCNY; GLG1; SEMA3E; CLNS1A; SORL1;
Erythrocytes	10	1539	12.8205	1.60333	0.0922749	1	1	1	RPS5; PGLS; KIF5B; PIP4K2A; AARS; VAC14; HDDC2; DDX19B; TBCEL; CLNS1A;
HTB75	8	1277	10.2564	1.54621	0.145273	1	1	1	U2AF2; RPS5; CD109; MYO6; PPIC; PGLS; KIF5B; AARS;
Smooth muscle cells	17	5124	21.7949	0.818321	0.865332	1	1	1	FRMPD2; ZNF274; FCAR; U2AF2; ZNF544; MTO1; GRIK2; CD109; MYO6; KIF5B; CDH5; PMFBP1; HDDC2; CCNY; GLG1; SEMA3E; SORL1;
Urine	17	3267	21.7949	1.28346	0.162525	1	1	1	NOC3L; EPS8L1; CD109; MYO6; PPIC; PGLS; PIP4K2A; KLK11; KLK12; KIAA1217; DDX19A; GLG1; DDX19B; NTM; OPCML; TECTA; SORL1;
Heart	22	5507	28.2051	0.98522	0.576436	1	1	1	ZNF274; ZNF530; NAT14; MTO1; CD109; MYO6; KIAA1191; PPIC; SLC27A1; PIP4K2A; PARD3; HYDIN; VAC14; KLK11; LENG8; BHLHE40; KIAA1217; DDX28; CFDP1; SC5D; UBASH3B; SORL1;
Amygdala	9	1204	11.5385	1.84469	0.0543188	1	1	1	ZNF530; CD109; KIAA1191; UNC79; HYDIN; LENG8; KIAA1217; UBASH3B; SORL1;
Thyroid gland	31	7306	39.7436	1.04629	0.416409	1	1	1	FRMPD2; ZNF274; FCAR; U2AF2; TPD52L1; ZNF544; ZNF8; KLK4; MTO1; GRIK2; CD109; MYO6; SLC27A1; KIF5B; PARD3; VAC14; CDH5; PMFBP1; FAS; KLK11; HDDC2; KLK12; TTYH1; BHLHE40; KIAA1217; CCNY; GLG1; SEMA3E; NTM; CLNS1A; SORL1;
H460	2	736	2.5641	0.673196	0.805056	1	1	1	CD109; SEMA3E;
Heart muscle	19	6191	24.359	0.75692	0.948788	1	1	1	FRMPD2; ZNF274; U2AF2; TPD52L1; ZNF544; ZNF8; MTO1; GRIK2; SLC27A1; KIF5B; VAC14; CDH5; PMFBP1; TTYH1; BHLHE40; CCNY; GLG1; TECTA; SORL1;
B Cell	6	2254	7.69231	0.657276	0.907335	1	1	1	U2AF2; RPS5; PGLS; PIP4K2A; AARS; SF3B3;
Spinal cord	12	1465	15.3846	2.02084	0.0145775	1	1	1	ZNF530; CD109; KIAA1191; UNC79; HYDIN; ZFHX3; KLK11; LENG8; GRM7; KIAA1217; UBASH3B; SORL1;
Malignant glioma	28	7169	35.8974	0.963126	0.641119	1	1	1	FRMPD2; ZNF274; FCAR; U2AF2; TPD52L1; ZNF544; ZNF8; MTO1; GRIK2; CD109; MYO6; SLC27A1; ODF2; KIF5B; PARD3; VAC14; CDH5; PMFBP1; HDDC2; BHLHE40; KIAA1217; CCNY; GLG1; SEMA3E; NTM; CLNS1A; TECTA; SORL1;
Cervical cancer	29	7426	37.1795	0.962989	0.644241	1	1	1	FRMPD2; ZNF274; U2AF2; TPD52L1; ZNF544; ZNF8; MTO1; GRIK2; CD109; MYO6; SLC27A1; ODF2; KIF5B; PARD3; VAC14; CDH5; PMFBP1; FAS; HDDC2; TTYH1; BHLHE40; KIAA1217; CCNY; GLG1; SEMA3E; NTM; CLNS1A; TECTA; SORL1;
Malignant melanoma	30	7459	38.4615	0.991777	0.566379	1	1	1	FRMPD2; ZNF274; FCAR; U2AF2; TPD52L1; ZNF544; ZNF8; MTO1; GRIK2; CD109; MYO6; SLC27A1; ODF2; KIF5B; PARD3; VAC14; CDH5; PMFBP1; FAS; HDDC2; TTYH1; BHLHE40; KIAA1217; CCNY; GLG1; SEMA3E; NTM; CLNS1A; TECTA; SORL1;
Embryonal carcinoma cells	10	1232	12.8205	2.00285	0.0267991	1	1	1	RPS5; MYO6; KIF5B; STX12; KIAA1217; DDX28; GLG1; DDX19B; SC5D; SORL1;
ES2	23	3527	29.4872	1.6082	0.0110537	1	0.937355	1	U2AF2; RPS5; CD109; MYO6; NLRP5; KIAA1191; PGLS; KIF5B; PIP4K2A; PARD3; AARS; COG4; CDH5; HDDC2; STX12; DDX19A; SF3B3; CFDP1; GLG1; DDX19B; NTM; OPCML; CLNS1A;
Ovary	37	8592	47.4359	1.06183	0.352143	1	1	1	FRMPD2; ZNF274; FCAR; U2AF2; TPD52L1; ZNF530; ZNF544; ZNF8; RPS5; MTO1; GRIK2; CD109; MYO6; NLRP5; KIAA1191; PGLS; KIF5B; AARS; HYDIN; VAC14; CDH5; PMFBP1; FAS; HDDC2; LENG8; TTYH1; STX12; KIAA1217; CCNY; DDX28; SF3B3; GLG1; DDX19B; SEMA3E; NTM; UBASH3B; SORL1;
Liver cancer	31	7697	39.7436	0.993137	0.563221	1	1	1	FRMPD2; ZNF274; FCAR; U2AF2; TPD52L1; ZNF544; ZNF8; MTO1; GRIK2; CD109; MYO6; SLC27A1; ODF2; KIF5B; PARD3; VAC14; CDH5; PMFBP1; FAS; KLK11; HDDC2; KLK12; BHLHE40; KIAA1217; CCNY; GLG1; SEMA3E; NTM; CLNS1A; TECTA; SORL1;
Dendritic cells	7	1954	8.97436	0.884342	0.69085	1	1	1	RPS5; PGLS; KIF5B; PIP4K2A; AARS; VAC14; CLNS1A;
OVCAR3	19	3714	24.359	1.26174	0.161259	1	1	1	EPS8L1; U2AF2; TPD52L1; RPS5; CD109; PPIC; PGLS; KIF5B; PARD3; AARS; DUS2; KLK11; HDDC2; KIAA1217; DDX19A; SF3B3; GLG1; CLNS1A; SORL1;
Huh7	16	2976	20.5128	1.32613	0.141719	1	1	1	CCDC106; ZNF274; U2AF2; RPS5; GRIK2; MYO6; GLE1; ODF2; KIF5B; AARS; DUS2; FAS; KIAA1217; SF3B3; TECTA; SORL1;
Serum	35	7685	44.8718	1.12299	0.219527	1	1	1	NOC3L; ZNF274; U2AF2; TPD52L1; ZNF8; RPS5; GRIK2; CD109; MYO6; NLRP5; PGLS; KIF5B; PIP4K2A; PARD3; AARS; HYDIN; VAC14; COG4; CDH5; ZFHX3; DUS2; PMFBP1; ZNF784; ZNF329; DEPDC4; KIAA1217; DDX19A; SF3B3; CFDP1; DDX19B; NTM; OPCML; TBCEL; CLNS1A; SORL1;
Lens	7	1037	8.97436	1.66634	0.127053	1	1	1	U2AF2; RPS5; MYO6; PGLS; KIF5B; AARS; CLNS1A;
Breast	24	6413	30.7692	0.92291	0.724287	1	1	1	FRMPD2; ZNF274; FCAR; U2AF2; TPD52L1; ZNF544; ZNF8; MTO1; GRIK2; CD109; MYO6; KIF5B; PARD3; VAC14; CDH5; PMFBP1; HDDC2; BHLHE40; CCNY; GLG1; SEMA3E; CLNS1A; TECTA; SORL1;
Hair	6	817	7.69231	1.81333	0.1139	1	1	1	RPS5; CD109; PGLS; GLE1; STX12; DDX19B;
H520	11	843	14.1026	3.21947	0.000571382	0.484532	0.356229	1	U2AF2; TPD52L1; RPS5; PGLS; KIF5B; AARS; DDX19A; CFDP1; GLG1; DDX19B; SORL1;
Nipple aspirate fluid	5	754	6.41026	1.63791	0.191009	1	1	1	RPS5; CD109; PPIC; KLK11; GLG1;
Uterus	7	917	8.97436	1.8844	0.078144	1	1	1	RPS5; KLK4; CD109; KLK11; KLK12; GRM7; SC5D;
CPE_SCX_fractionated	11	2331	14.1026	1.16432	0.344271	1	1	1	U2AF2; RPS5; CD109; MYO6; KIF5B; AARS; STX12; SF3B3; GLG1; DDX19B; UBASH3B;
CRC	18	4247	23.0769	1.04535	0.460179	1	1	1	U2AF2; RPS5; CD109; MYO6; PPIC; PGLS; KIF5B; AARS; KLK11; HDDC2; KIAA1217; DDX19A; SF3B3; CFDP1; GLG1; DDX19B; CLNS1A; SORL1;
Preadipocytes	4	510	5.12821	1.93818	0.152745	1	1	1	CD109; PPIC; PGLS; FAS;
Fetal hepatocytes	22	3784	28.2051	1.43383	0.0438964	1	1	1	FCAR; U2AF2; ZNF667; ZNF544; RPS5; MYO6; PGLS; KIF5B; PIP4K2A; PARD3; AARS; HYDIN; COG4; ZFHX3; DUS2; KLK11; ZNF583; BHLHE40; TECTA; GRIK4; SC5D; UBASH3B;
Amniotic fluid	3	566	3.84615	1.31091	0.404153	1	1	1	CD109; PGLS; CDH5;
Vulva/anal skin	26	6377	33.3333	1.00543	0.529784	1	1	1	FRMPD2; ZNF274; U2AF2; TPD52L1; ZNF544; ZNF8; MTO1; GRIK2; CD109; MYO6; KIF5B; PARD3; CDH5; PMFBP1; KLK11; HDDC2; KLK12; TTYH1; BHLHE40; KIAA1217; CCNY; GLG1; SEMA3E; NTM; TECTA; SORL1;
	5	1183	6.41026	1.04395	0.528363	1	1	1	EPS8L1; PGLS; KIF5B; COG4; GLG1;
HH4	18	2684	23.0769	1.65409	0.0199659	1	1	1	U2AF2; RPS5; CD109; MYO6; PGLS; GLE1; ODF2; PIP4K2A; AARS; HYDIN; COG4; ZFHX3; ZNF329; KLK11; HDDC2; BHLHE40; CCNY; TECTA;
Ramos	11	1566	14.1026	1.73309	0.0507067	1	1	1	RPS5; PGLS; PIP4K2A; VAC14; COG4; SNX24; STX12; SF3B3; GLG1; UBASH3B; SORL1;
Leukocytes	8	2845	10.2564	0.69403	0.907155	1	1	1	ZNF274; U2AF2; CD109; PGLS; KIF5B; PIP4K2A; DDX28; JAKMIP1;
Renal cancer	25	7121	32.0513	0.865768	0.848695	1	1	1	FRMPD2; FCAR; U2AF2; TPD52L1; ZNF544; ZNF8; MTO1; GRIK2; CD109; MYO6; ODF2; KIF5B; PARD3; VAC14; CDH5; PMFBP1; FAS; HDDC2; BHLHE40; KIAA1217; CCNY; GLG1; SEMA3E; CLNS1A; SORL1;
Aorta	3	530	3.84615	1.39995	0.364406	1	1	1	RPS5; CD109; PGLS;
hupo46_reference_cam	5	1042	6.41026	1.18521	0.41659	1	1	1	MYO6; SLC27A1; PIP4K2A; AARS; CCNY;
Substantia nigra	9	1146	11.5385	1.93805	0.0419405	1	1	1	ZNF530; CD109; KIAA1191; UNC79; HYDIN; LENG8; KIAA1217; UBASH3B; SORL1;
Vagina	21	5307	26.9231	0.9759	0.595772	1	1	1	FRMPD2; ZNF274; U2AF2; TPD52L1; ZNF544; ZNF8; MTO1; GRIK2; CD109; MYO6; KIF5B; PARD3; CDH5; HDDC2; KLK12; BHLHE40; KIAA1217; CCNY; GLG1; SEMA3E; SORL1;
Monocytes	3	745	3.84615	0.995941	0.586633	1	1	1	FCAR; RPS5; CD109;
MDA-MB-468	3	770	3.84615	0.963606	0.609261	1	1	1	MYO6; AARS; SF3B3;
Platelets	12	2168	15.3846	1.36556	0.164497	1	1	1	FCAR; MTO1; PGLS; KIF5B; PIP4K2A; AARS; SNX24; STX12; CCNY; JAKMIP1; UBASH3B; SORL1;
HL60	5	545	6.41026	2.26601	0.0704374	1	1	1	FCAR; RPS5; CD109; FAS; GLG1;
TOV21G	5	904	6.41026	1.36614	0.304618	1	1	1	U2AF2; RPS5; PPIC; PGLS; SF3B3;
Oral mucosa	24	5861	30.7692	1.00983	0.520454	1	1	1	FRMPD2; ZNF274; U2AF2; TPD52L1; ZNF544; MTO1; GRIK2; CD109; MYO6; KIF5B; VAC14; CDH5; PMFBP1; HDDC2; KLK12; TTYH1; BHLHE40; KIAA1217; CCNY; GLG1; SEMA3E; CLNS1A; TECTA; SORL1;
Esophagus	25	6034	32.0513	1.02173	0.491508	1	1	1	FRMPD2; ZNF274; FCAR; U2AF2; TPD52L1; ZNF544; ZNF8; MTO1; GRIK2; CD109; MYO6; KIF5B; PARD3; VAC14; CDH5; HDDC2; TTYH1; BHLHE40; KIAA1217; CCNY; GLG1; SEMA3E; CLNS1A; TECTA; SORL1;
Corpus callosum	8	988	10.2564	1.99848	0.0465459	1	1	1	ZNF530; KIAA1191; UNC79; HYDIN; LENG8; KIAA1217; UBASH3B; SORL1;
NB4	6	711	7.69231	2.08367	0.0685624	1	1	1	FCAR; RPS5; FAS; SLC17A5; SF3B3; GLG1;
Mammary gland	5	760	6.41026	1.62498	0.195231	1	1	1	KLK4; CD109; KLK11; KLK12; SC5D;
031003_BALF2	6	1102	7.69231	1.34437	0.288969	1	1	1	U2AF2; MYO6; PGLS; KIF5B; AARS; GLG1;
Tears	4	510	5.12821	1.93818	0.152745	1	1	1	PPIC; PGLS; KIF5B; GLG1;
Cellzome_Abl_inhibitors_NatureBiotechnology_exp144	1	186	1.28205	1.33849	0.532169	1	1	1	PIP4K2A;
CaOV3	17	3355	21.7949	1.2498	0.191258	1	1	1	NOC3L; EPS8L1; U2AF2; TPD52L1; RPS5; CD109; MYO6; PGLS; KIF5B; PIP4K2A; AARS; CDH5; FAS; STX12; KIAA1217; SF3B3; CLNS1A;
Cerebrospinal fluid	9	1059	11.5385	2.09727	0.0272328	1	1	1	RPS5; CD109; PPIC; PGLS; KLK11; STX12; NTM; OPCML; SORL1;
Melanoma	9	1826	11.5385	1.21633	0.320782	1	1	1	U2AF2; RPS5; CD109; PGLS; GLE1; AARS; STX12; SF3B3; CLNS1A;
Subthalamic nucleus	9	882	11.5385	2.51814	0.0092561	1	0.87213	1	ZNF530; CD109; KIAA1191; UNC79; HYDIN; LENG8; KIAA1217; UBASH3B; SORL1;
15_clinprot_c3	2	749	2.5641	0.661512	0.812914	1	1	1	U2AF2; SF3B3;
Ubiquitous	8	1052	10.2564	1.8769	0.0627634	1	1	1	ZNF274; U2AF2; MTO1; MYO6; VAC14; FAS; SLC17A5; DDX19B;
Cortex	5	683	6.41026	1.80817	0.143881	1	1	1	PGLS; AARS; TTYH1; NTM; OPCML;
17_wcx	9	1438	11.5385	1.54451	0.127231	1	1	1	U2AF2; RPS5; MYO6; KIF5B; PIP4K2A; AARS; SF3B3; GLG1; DDX19B;
hupo1_b2-edta_cam	2	316	2.5641	1.56792	0.367717	1	1	1	RPS5; CDH5;
H23	6	896	7.69231	1.65345	0.155622	1	1	1	U2AF2; RPS5; CD109; PGLS; SF3B3; GLG1;
YTS	10	1888	12.8205	1.30695	0.233127	1	1	1	RPS5; MYO6; SLC27A1; GLE1; KIF5B; AARS; FAS; DDX19A; GLG1; DDX19B;
hupo1_b2-hep_cam	2	848	2.5641	0.584284	0.864125	1	1	1	STX12; GLG1;
Embryonic stem cells	17	3047	21.7949	1.37613	0.102272	1	1	1	NOC3L; U2AF2; RPS5; NAT14; MYO6; SLC27A1; GLE1; KIF5B; AARS; VAC14; STX12; CCNY; DDX28; SF3B3; GLG1; SC5D; SORL1;
Saliva	4	912	5.12821	1.08386	0.509515	1	1	1	PGLS; KLK11; KLK12; GLG1;
Nuclear	10	1319	12.8205	1.87075	0.0400613	1	1	1	U2AF2; ZNF8; RPS5; MYO6; KIF5B; AARS; KIAA1217; SF3B3; GLG1; CLNS1A;
N06CS98-2	3	165	3.84615	4.49661	0.0295439	1	1	1	MTO1; CDH5; DYRK3;
MV4-11	4	382	5.12821	2.58761	0.0696896	1	1	1	RPS5; PGLS; PIP4K2A; VAC14;
Caudate nucleus	9	1204	11.5385	1.84469	0.0543188	1	1	1	ZNF530; CD109; KIAA1191; UNC79; HYDIN; LENG8; KIAA1217; UBASH3B; SORL1;
Retina	4	364	5.12821	2.71557	0.060553	1	1	1	RPS5; IMPG1; GRM7; SC5D;
Medulla oblongata	1	473	1.28205	0.526357	0.857228	1	1	1	CD109;
PC3(AR)6	1	262	1.28205	0.950239	0.65774	1	1	1	PPIC;
Neutrophils	1	393	1.28205	0.633501	0.800881	1	1	1	FCAR;
HEK293	23	4439	29.4872	1.27779	0.11481	1	1	1	NOC3L; U2AF2; TPD52L1; RPS5; NAT14; MYO6; PPIC; PGLS; GLE1; KIF5B; PIP4K2A; PARD3; AARS; VAC14; LENG8; STX12; DDX28; SF3B3; CFDP1; GLG1; DDX19B; CLNS1A; SORL1;
A549	8	997	10.2564	1.98044	0.0486374	1	1	1	EPS8L1; RPS5; GLE1; KIF5B; AARS; COG4; HDDC2; SF3B3;
Semen	9	966	11.5385	2.29918	0.0160409	1	1	1	CD109; PPIC; PGLS; ODF2; KIF5B; KLK11; HDDC2; GLG1; SORL1;
Temporal cortex	1	51	1.28205	4.88085	0.187432	1	1	1	SORL1;
Fetus	13	2992	16.6667	1.07187	0.440686	1	1	1	ZNF530; CD109; UNC79; HYDIN; DYRK3; KLK11; LENG8; BHLHE40; GRM7; KIAA1217; GRIK4; SC5D; UBASH3B;
MCF7	6	317	7.69231	4.67338	0.0018171	1	0.513633	1	CD109; PPIC; AARS; SF3B3; GLG1; SORL1;
051503_BAL20_gly_hui	1	268	1.28205	0.928966	0.666099	1	1	1	RPS5;
Adducin	4	486	5.12821	2.03389	0.134988	1	1	1	U2AF2; RPS5; PIP4K2A; AARS;
MCF10A	3	661	3.84615	1.1225	0.505003	1	1	1	U2AF2; CD109; PGLS;
22_mars	1	196	1.28205	1.2702	0.550985	1	1	1	CDH5;
041803_BALF3	5	1103	6.41026	1.11966	0.465762	1	1	1	U2AF2; RPS5; PGLS; KIF5B; AARS;
Macrophages	1	274	1.28205	0.908624	0.674257	1	1	1	FCAR;
Muscle	4	904	5.12821	1.09345	0.502532	1	1	1	SLC27A1; DYRK3; CFDP1; SC5D;
MicroProt2	4	561	5.12821	1.76199	0.193183	1	1	1	CD109; MYO6; PGLS; SORL1;
Endometrium	1	1202	1.28205	0.20713	0.993558	1	1	1	CDH5;
Thalamus	9	1141	11.5385	1.94655	0.0409731	1	1	1	ZNF530; CD109; KIAA1191; UNC79; HYDIN; LENG8; KIAA1217; UBASH3B; SORL1;
Putamen	2	527	2.5641	0.94017	0.634518	1	1	1	CD109; SORL1;
ARPE-19	1	330	1.28205	0.754438	0.741507	1	1	1	GLG1;
Temporal lobe	2	477	2.5641	1.03872	0.579861	1	1	1	CD109; SORL1;
RMUG	2	499	2.5641	0.992924	0.604607	1	1	1	U2AF2; CD109;
DU145	5	941	6.41026	1.31242	0.33439	1	1	1	RPS5; AARS; CCNY; SF3B3; GLG1;
Lacrimal glands	4	453	5.12821	2.18206	0.112103	1	1	1	PPIC; PGLS; KIF5B; GLG1;
Cervico-vaginal fluid	4	565	5.12821	1.74951	0.196492	1	1	1	EPS8L1; MYO6; KLK11; KLK12;
Embryo	1	104	1.28205	2.39373	0.34547	1	1	1	BHLHE40;
Uterine cervix	1	902	1.28205	0.276019	0.976598	1	1	1	CDH5;
Thymus	1	456	1.28205	0.545979	0.846752	1	1	1	KLK11;
Aspc1	6	483	7.69231	3.06724	0.0136478	1	1	1	PGLS; KIF5B; AARS; KLK11; SF3B3; GLG1;
Trachea	6	612	7.69231	2.42072	0.0378722	1	1	1	CD109; KLK11; KLK12; GRM7; SC5D; SORL1;
050603_BALF11	4	1019	5.12821	0.970052	0.598375	1	1	1	U2AF2; RPS5; MYO6; SORL1;
HCC78	4	249	5.12821	3.96969	0.0185528	1	1	1	EPS8L1; MYO6; PARD3; KIAA1217;
RBC	1	267	1.28205	0.932445	0.66472	1	1	1	PIP4K2A;
HPDE6	2	414	2.5641	1.19678	0.503022	1	1	1	U2AF2; CD109;
Occipital lobe	1	359	1.28205	0.693496	0.770741	1	1	1	CD109;
N06CS97	2	270	2.5641	1.83504	0.299502	1	1	1	PARD3; DYRK3;
Cartilage	1	89	1.28205	2.79712	0.304111	1	1	1	BHLHE40;
MiaPaCa2	2	289	2.5641	1.7144	0.327899	1	1	1	CD109; SF3B3;
Intestine	3	508	3.84615	1.46057	0.339926	1	1	1	VAC14; KLK11; BHLHE40;
Blood	1	227	1.28205	1.09674	0.604695	1	1	1	CLNS1A;
Adipocytes	1	147	1.28205	1.69357	0.451053	1	1	1	FAS;
Pituitary gland	2	494	2.5641	1.00297	0.599079	1	1	1	CD109; KLK11;
Vulva	1	838	1.28205	0.297099	0.969269	1	1	1	CDH5;
B cells	3	533	3.84615	1.39207	0.367737	1	1	1	RPS5; AARS; FAS;
SH-SY5Y	2	537	2.5641	0.922663	0.644771	1	1	1	U2AF2; GRIK2;
Cytoskeleton	1	86	1.28205	2.89469	0.295534	1	1	1	PIP4K2A;
Hematopoietic stem cells	2	200	2.5641	2.47727	0.194743	1	1	1	CD109; GLG1;
Panc1	1	346	1.28205	0.719552	0.758064	1	1	1	CD109;
Frontal lobe	2	480	2.5641	1.03223	0.5833	1	1	1	CD109; SORL1;
01_glyco	6	667	7.69231	2.22112	0.0535368	1	1	1	U2AF2; RPS5; MYO6; CDH5; SF3B3; GLG1;
Kidney cancer	1	352	1.28205	0.707287	0.763999	1	1	1	ZNF530;
Umbilical vein endothelial cells	1	178	1.28205	1.39864	0.516557	1	1	1	CDH5;
H2228	2	168	2.5641	2.9491	0.148661	1	1	1	PARD3; DYRK3;
Granulocytes	1	89	1.28205	2.79712	0.304111	1	1	1	CD109;
BJ635	4	175	5.12821	5.64821	0.00560264	1	0.67872	1	FCAR; PARD3; DYRK3; KIAA1217;
Mesenchymal stromal cells	2	178	2.5641	2.78343	0.162822	1	1	1	CD109; GLG1;
H1703	2	138	2.5641	3.59017	0.108032	1	1	1	PARD3; DYRK3;
Adipose tissue	1	155	1.28205	1.60617	0.468751	1	1	1	SLC27A1;
Occipital pole	1	129	1.28205	1.92987	0.409075	1	1	1	SORL1;
N06cs110	2	87	2.5641	5.69451	0.0486917	1	1	1	FCAR; PIP4K2A;
Retinal pigmented epithelial cells	1	51	1.28205	4.88085	0.187432	1	1	1	IMPG1;
Eosinophils	1	100	1.28205	2.48947	0.334684	1	1	1	FCAR;
Occipital cortex	1	39	1.28205	6.38226	0.146721	1	1	1	OPCML;
Myeloid stem cell	1	16	1.28205	15.551	0.062985	1	1	1	FCAR;
Cardiac muscle	1	64	1.28205	3.88958	0.229373	1	1	1	KIAA1217;
Oocytes	1	38	1.28205	6.55017	0.143239	1	1	1	NLRP5;
Cochlea	1	28	1.28205	8.88868	0.107638	1	1	1	MTO1;
N06BJ504	2	78	2.5641	6.35148	0.0400025	1	1	1	COG4; CDH5;
Vascular endothelial cells	2	63	2.5641	7.8635	0.0270441	1	1	1	CD109; CDH5;
Dentate gyrus	1	26	1.28205	9.57217	0.100345	1	1	1	GRIK2;
Rods	1	11	1.28205	22.6133	0.043735	1	1	1	IMPG1;
Mesoappendix	1	6	1.28205	41.4263	0.0240946	1	1	1	CD109;
Insular cortex membrane micro domains	1	75	1.28205	3.31918	0.263186	1	1	1	NTM;
Mononuclear phagocytes	1	12	1.28205	20.7304	0.047616	1	1	1	FCAR;
Ear	1	15	1.28205	16.5871	0.0591659	1	1	1	TECTA;
Dermal microvascular endothelial cells	1	14	1.28205	17.771	0.0553313	1	1	1	CDH5;
Thrombocyte	1	6	1.28205	41.4263	0.0240946	1	1	1	CD109;
Cones	1	11	1.28205	22.6133	0.043735	1	1	1	IMPG1;
Canal of Schlemm	1	1	1.28205	246.507	0.00405616	1	0.573271	1	CDH5;
Fetal liver	1	2	1.28205	123.867	0.00809608	1	0.858185	1	CD109;
Kupffer cell	1	8	1.28205	31.0827	0.0319981	1	1	1	FCAR;
Fetal spleen	1	1	1.28205	246.507	0.00405616	1	0.573271	1	CD109;
Fetal kidney	1	1	1.28205	246.507	0.00405616	1	0.573271	1	CD109;

## Sheet: Transcription factor
Analysis: Transcription factor
Dataset name: Western Pleasure
Number of genes in the dataset: 78
Number of genes in the dataset (which are available in Transcription factor database) :73
Number of genes in background: 19230
Is analysis quantitative: No
						Corrected p-values
Transcription factor	No. of genes in the dataset	No.of genes in the background dataset	Percentage of genes	Fold enrichment	P-value (Hypergeometric test)	Bonferroni method	BH method	Q-value (Storey-Tibshirani method)
MAFB	1	352	1.28205	0.707287	0.763999	1	1	1	PIP4K2A;
NFIC	7	2040	8.97436	0.847062	0.734035	1	1	1	GRIK2; CDH5; ZFHX3; KLK11; GRM7; KIAA1217; SORL1;
NR1H3	4	1020	5.12821	0.969101	0.599161	1	1	1	MYO6; HYDIN; SLC35F3; TBCEL;
PITX3	1	265	1.28205	0.939482	0.661945	1	1	1	FRMPD2;
RXRA	6	1113	7.69231	1.33108	0.296787	1	0.865628	1	MYO6; PIP4K2A; PARD3; HYDIN; SLC35F3; KIAA1217;
SOAT1	4	1261	5.12821	0.78389	0.760865	1	1	1	U2AF2; MYO6; STX12; KIAA1217;
STAT1	4	1261	5.12821	0.78389	0.760865	1	1	1	U2AF2; MYO6; STX12; KIAA1217;
ETS1	13	2496	16.6667	1.28487	0.206794	1	0.79734	1	FCAR; U2AF2; ZNF544; CDH5; ZFHX3; DYRK3; FAS; BHLHE40; DEPDC4; DDX19A; DDX19B; NTM; TECTA;
HNF1A	2	831	2.5641	0.596237	0.856342	1	1	1	ZFHX3; KIAA1217;
HOXC9	5	573	6.41026	2.15529	0.0831643	1	0.680482	1	TPD52L1; CD109; PMFBP1; SNX24; NTM;
IRF1	3	811	3.84615	0.914891	0.644597	1	1	1	EPS8L1; GRIK2; MYO6;
LHX3	9	1210	11.5385	1.83555	0.0557236	1	0.680482	1	TPD52L1; MTO1; GRIK2; MYO6; PARD3; GRM7; KIAA1217; CCNY; TECTA;
MEF2A	13	1835	16.6667	1.7477	0.0325453	1	0.680482	1	FRMPD2; GRIK2; CD109; PPIC; KIF5B; PIP4K2A; ZFHX3; FAS; ZNF784; GRM7; PRIMA1; NTM; TECTA;
NKX6-1	4	1408	5.12821	0.70205	0.832117	1	1	1	GRIK2; ZFHX3; GRM7; KIAA1217;
OTX2	2	324	2.5641	1.52921	0.379353	1	0.985974	1	GRM7; NTM;
PHOX2A	3	442	3.84615	1.67866	0.266669	1	0.823537	1	GRIK2; PARD3; NTM;
POU2F1	14	2209	17.9487	1.5634	0.0594738	1	0.680482	1	ZNF8; GRIK2; MYO6; UNC79; KIF5B; PARD3; ZFHX3; SLC17A5; BHLHE40; GRM7; STX12; KIAA1217; NTM; TECTA;
POU3F2	6	789	7.69231	1.87768	0.100692	1	0.704842	1	TPD52L1; GRIK2; PARD3; GRM7; KIAA1217; NTM;
SRF	1	462	1.28205	0.538889	0.850533	1	1	1	STX12;
ARID3A	7	1250	8.97436	1.3824	0.243079	1	0.79734	1	GRIK2; MYO6; GRM7; KIAA1217; NTM; OPCML; TECTA;
EHF	4	753	5.12821	1.31272	0.365152	1	0.983102	1	ZNF274; U2AF2; RPS5; VAC14;
FOXA1	6	804	7.69231	1.84265	0.10766	1	0.706522	1	GRIK2; MYO6; PARD3; KIAA1217; NTM; TECTA;
ATF1	7	1037	8.97436	1.66634	0.127053	1	0.762318	1	DUS2; STX12; DEPDC4; KIAA1217; DDX28; DDX19A; DDX19B;
CREB1	8	973	10.2564	2.02929	0.0431943	1	0.680482	1	NAT14; DUS2; LENG8; STX12; DEPDC4; KIAA1217; DDX28; DDX19A;
JDP2	6	763	7.69231	1.94166	0.089209	1	0.680482	1	ZFHX3; DUS2; STX12; DEPDC4; KIAA1217; DDX28;
NFYA	9	2544	11.5385	0.873042	0.719825	1	1	1	ZNF8; MTO1; KIF5B; PARD3; LENG8; PRIMA1; JAKMIP1; NTM; SC5D;
PLAU	7	1037	8.97436	1.66634	0.127053	1	0.762318	1	DUS2; STX12; DEPDC4; KIAA1217; DDX28; DDX19A; DDX19B;
RORA	7	1168	8.97436	1.47945	0.194604	1	0.79734	1	TPD52L1; MYO6; SLC17A5; GRM7; CCNY; NTM; OPCML;
YY1	10	1317	12.8205	1.87359	0.039713	1	0.680482	1	ZNF274; U2AF2; GRIK2; UNC79; ODF2; VAC14; DYRK3; SLC17A5; GLG1; NTM;
ELK1	13	1986	16.6667	1.61482	0.0556753	1	0.680482	1	NOC3L; ZNF274; U2AF2; ZNF530; ZNF544; MYO6; KIAA1191; COG4; CDH5; ZFHX3; LENG8; SF3B3; CFDP1;
GABPA	18	2702	23.0769	1.64307	0.0212433	1	0.680482	1	NOC3L; ZNF274; U2AF2; ZNF530; NAT14; GRIK2; KIAA1191; ODF2; VAC14; COG4; ZFHX3; LENG8; DDX19A; SF3B3; CFDP1; DDX19B; NTM; TBCEL;
CTCF	9	2605	11.5385	0.852599	0.746339	1	1	1	FRMPD2; NOC3L; U2AF2; PIP4K2A; DYRK3; SLC35F3; SLC17A5; TTYH1; UBASH3B;
FEV	3	526	3.84615	1.41059	0.359962	1	0.981716	1	GLE1; FAS; SORL1;
HERPUD1	2	421	2.5641	1.17688	0.511987	1	1	1	NAT14; ZFHX3;
KLF7	20	4448	25.641	1.10895	0.340071	1	0.96003	1	EPS8L1; ZNF581; ZNF274; ZNF667; SLC27A1; GLE1; ODF2; VAC14; DYRK3; ZNF784; TTYH1; BHLHE40; STX12; DEPDC4; KIAA1217; CFDP1; GLG1; JAKMIP1; SC5D; UBASH3B;
MAF	1	466	1.28205	0.534263	0.853002	1	1	1	KIAA1217;
NR5A1	2	1129	2.5641	0.438862	0.948003	1	1	1	KIAA1217; NTM;
RFX1	14	2158	17.9487	1.60035	0.0506417	1	0.680482	1	U2AF2; NAT14; ODF2; PARD3; HYDIN; DYRK3; SLC17A5; TTYH1; GRM7; DEPDC4; KIAA1217; NTM; OPCML; TBCEL;
RREB1	4	2136	5.12821	0.462775	0.97903	1	1	1	KIAA1191; DEPDC4; KIAA1217; NTM;
SF1	2	1129	2.5641	0.438862	0.948003	1	1	1	KIAA1217; NTM;
SP1	32	7140	41.0256	1.10514	0.273484	1	0.832344	1	EPS8L1; ZNF581; CCDC106; ZNF274; ZNF667; RPS5; KLK4; SLC27A1; UNC79; GLE1; ODF2; PIP4K2A; PARD3; VAC14; DYRK3; ZNF784; KLK11; SLC17A5; TTYH1; SNX24; BHLHE40; GRM7; STX12; PRIMA1; DEPDC4; CFDP1; GLG1; JAKMIP1; NTM; OPCML; SC5D; UBASH3B;
SP4	18	4345	23.0769	1.02177	0.503523	1	1	1	NOC3L; EPS8L1; ZNF274; U2AF2; KLK4; SLC27A1; GLE1; VAC14; ZNF784; SLC17A5; GRM7; STX12; DEPDC4; CFDP1; JAKMIP1; NTM; SC5D; UBASH3B;
TCF3	11	2140	14.1026	1.26824	0.247261	1	0.79734	1	TPD52L1; GLE1; PIP4K2A; CDH5; ZFHX3; FAS; SNX24; KIAA1217; NTM; UBASH3B; SORL1;
OTX1	1	848	1.28205	0.293596	0.970548	1	1	1	NTM;
PITX1	1	848	1.28205	0.293596	0.970548	1	1	1	NTM;
E2F1	3	1188	3.84615	0.624562	0.868049	1	1	1	ZNF274; COG4; SF3B3;
EGR1	12	3215	15.3846	0.920852	0.67048	1	1	1	EPS8L1; CCDC106; VAC14; ZNF784; SLC17A5; LENG8; BHLHE40; GRM7; KIAA1217; GLG1; TBCEL; UBASH3B;
NKX2-1	3	711	3.84615	1.04357	0.554593	1	1	1	GRM7; STX12; KIAA1217;
NRF1	13	2037	16.6667	1.57439	0.0655728	1	0.680482	1	CCDC106; U2AF2; ZNF667; RPS5; PPIC; PGLS; UNC79; GLE1; KIF5B; ZNF583; LENG8; STX12; CFDP1;
BACH1	3	648	3.84615	1.14502	0.491667	1	1	1	GRIK2; CD109; KIAA1217;
HOXB4	3	718	3.84615	1.03339	0.561306	1	1	1	GRIK2; KIAA1217; NTM;
MEIS2	4	527	5.12821	1.87566	0.165841	1	0.79734	1	UNC79; PIP4K2A; KLK12; OPCML;
NR4A2	6	1042	7.69231	1.42178	0.247285	1	0.79734	1	CCDC106; BHLHE40; KIAA1217; OPCML; TECTA; SORL1;
PPARG	4	2016	5.12821	0.490321	0.969495	1	1	1	HYDIN; SLC35F3; PRIMA1; NTM;
HSF1	5	806	6.41026	1.53224	0.228645	1	0.79734	1	COG4; SLC17A5; STX12; SF3B3; JAKMIP1;
ETV7	6	1049	7.69231	1.41229	0.252054	1	0.79734	1	NOC3L; FCAR; ODF2; DEPDC4; CFDP1; NTM;
NR5A2	4	486	5.12821	2.03389	0.134988	1	0.772287	1	NOC3L; GLG1; JAKMIP1; NTM;
TEAD1	2	422	2.5641	1.17409	0.513259	1	1	1	GRM7; KIAA1217;
TFAP2A	3	258	3.84615	2.8758	0.0874263	1	0.680482	1	BHLHE40; CFDP1; TBCEL;
ARNT	4	403	5.12821	2.45278	0.0811989	1	0.680482	1	UNC79; VAC14; KIAA1217; TBCEL;
BARX1	2	382	2.5641	1.29703	0.460759	1	1	1	GRIK2; PARD3;
DMBX1	3	368	3.84615	2.01621	0.187802	1	0.79734	1	MTO1; PIP4K2A; SNX24;
GSC	3	379	3.84615	1.9577	0.199132	1	0.79734	1	MTO1; PIP4K2A; NTM;
HNF4A	9	3015	11.5385	0.736657	0.881104	1	1	1	UNC79; HYDIN; CDH5; SLC35F3; BHLHE40; GRM7; KIAA1217; GLG1; NTM;
HOXA3	3	573	3.84615	1.29489	0.411812	1	0.994028	1	PARD3; SNX24; NTM;
HOXB3	1	335	1.28205	0.743178	0.746797	1	1	1	PARD3;
HOXD8	5	811	6.41026	1.52279	0.232379	1	0.79734	1	MYO6; PARD3; ZFHX3; KIAA1217; NTM;
ONECUT1	6	564	7.69231	2.62674	0.0269196	1	0.680482	1	GRIK2; CD109; IMPG1; CFDP1; NTM; TECTA;
PAX7	1	467	1.28205	0.533119	0.853614	1	1	1	KIAA1217;
POU4F3	4	687	5.12821	1.43883	0.304067	1	0.874713	1	TPD52L1; GRIK2; KIAA1217; NTM;
PRRX2	4	597	5.12821	1.65574	0.223573	1	0.79734	1	TPD52L1; PARD3; KIAA1217; NTM;
VAX2	1	434	1.28205	0.573655	0.832062	1	1	1	PARD3;
VSX2	5	595	6.41026	2.0756	0.0939713	1	0.680482	1	TPD52L1; PARD3; FAS; KIAA1217; NTM;
CACD	5	514	6.41026	2.40268	0.0577152	1	0.680482	1	CD109; ODF2; CDH5; LENG8; KIAA1217;
HOXB13	1	526	1.28205	0.473322	0.885556	1	1	1	OPCML;
ZNF238	5	799	6.41026	1.54566	0.223448	1	0.79734	1	KIAA1191; DUS2; SIMC1; DDX28; NTM;
ZNF513	5	799	6.41026	1.54566	0.223448	1	0.79734	1	KIAA1191; DUS2; SIMC1; DDX28; NTM;
MYC	5	1086	6.41026	1.13719	0.452151	1	1	1	U2AF2; UNC79; ODF2; TBCEL; SC5D;
MYF5	12	1856	15.3846	1.59511	0.0701174	1	0.680482	1	FRMPD2; TPD52L1; RPS5; KLK4; NAT14; MYO6; ODF2; KIF5B; PARD3; ZFHX3; KLK12; NTM;
FOXD1	2	334	2.5641	1.48343	0.393775	1	0.985974	1	MYO6; GRM7;
POU6F1	6	655	7.69231	2.26181	0.0498266	1	0.680482	1	MYO6; KIAA1191; PRIMA1; NTM; CLNS1A; SORL1;
ASCL2	4	1499	5.12821	0.659431	0.866857	1	1	1	RPS5; PIP4K2A; NTM; TBCEL;
BARHL1	4	509	5.12821	1.94199	0.151988	1	0.79734	1	ZFHX3; GRM7; NTM; TECTA;
ESRRA	2	917	2.5641	0.54032	0.891953	1	1	1	NTM; OPCML;
GBX1	2	199	2.5641	2.48972	0.193274	1	0.79734	1	PARD3; NTM;
GBX2	3	302	3.84615	2.45683	0.124253	1	0.762318	1	MTO1; PARD3; NTM;
LHX4	3	392	3.84615	1.89277	0.212732	1	0.79734	1	TPD52L1; PARD3; NTM;
POU3F4	1	366	1.28205	0.680233	0.777294	1	1	1	GRM7;
TCF12	7	1099	8.97436	1.57234	0.157331	1	0.79734	1	TPD52L1; ODF2; CDH5; SLC17A5; IMPG1; GRM7; JAKMIP1;
ELF2	5	780	6.41026	1.58331	0.209539	1	0.79734	1	GLE1; KIAA1217; NTM; TBCEL; UBASH3B;
ESR1	2	696	2.5641	0.711885	0.779048	1	1	1	FRMPD2; BHLHE40;
FOS	6	1754	7.69231	0.84464	0.726703	1	1	1	KLK4; CD109; KLK12; GRM7; KIAA1217; TECTA;
FOSB	6	1754	7.69231	0.84464	0.726703	1	1	1	KLK4; CD109; KLK12; GRM7; KIAA1217; TECTA;
JUN	6	1754	7.69231	0.84464	0.726703	1	1	1	KLK4; CD109; KLK12; GRM7; KIAA1217; TECTA;
JUNB	6	1754	7.69231	0.84464	0.726703	1	1	1	KLK4; CD109; KLK12; GRM7; KIAA1217; TECTA;
JUND	6	1754	7.69231	0.84464	0.726703	1	1	1	KLK4; CD109; KLK12; GRM7; KIAA1217; TECTA;
NR6A1	6	769	7.69231	1.92651	0.091791	1	0.680482	1	MYO6; KIF5B; AARS; ZFHX3; TTYH1; NTM;
RAB40B	3	806	3.84615	0.920567	0.640407	1	1	1	KIAA1217; TECTA; SORL1;
RARA	3	806	3.84615	0.920567	0.640407	1	1	1	KIAA1217; TECTA; SORL1;
SPI1	5	814	6.41026	1.51718	0.234628	1	0.79734	1	U2AF2; KIF5B; DYRK3; KIAA1217; SORL1;
BARX2	1	296	1.28205	0.841093	0.70252	1	1	1	NTM;
DBX2	4	408	5.12821	2.42272	0.0840712	1	0.680482	1	GRIK2; GRM7; KIAA1217; NTM;
EN1	5	466	6.41026	2.65016	0.0408755	1	0.680482	1	GRIK2; PARD3; GRM7; NTM; TECTA;
FOXC1	1	301	1.28205	0.827122	0.708598	1	1	1	FRMPD2;
HOXA5	4	916	5.12821	1.07913	0.512991	1	1	1	TPD52L1; GRIK2; PARD3; SNX24;
HOXA7	4	527	5.12821	1.87566	0.165841	1	0.79734	1	GRIK2; ZFHX3; GRM7; KIAA1217;
HOXB6	1	123	1.28205	2.024	0.39439	1	0.985974	1	GRIK2;
HOXB7	2	388	2.5641	1.27697	0.468839	1	1	1	NTM; TBCEL;
HOXC6	1	237	1.28205	1.05047	0.620628	1	1	1	GRM7;
ISX	2	265	2.5641	1.86966	0.291996	1	0.865628	1	FRMPD2; PARD3;
LHX8	2	223	2.5641	2.22178	0.228884	1	0.79734	1	MTO1; PARD3;
MNX1	1	311	1.28205	0.800527	0.720388	1	1	1	PARD3;
MSX1	3	234	3.84615	3.17074	0.0696874	1	0.680482	1	ZFHX3; GRM7; KIAA1217;
NKX1-1	1	146	1.28205	1.70517	0.4488	1	1	1	PARD3;
PAX6	3	557	3.84615	1.33209	0.394268	1	0.985974	1	PARD3; KIAA1217; NTM;
PBX1	4	741	5.12821	1.33398	0.354007	1	0.978177	1	GRIK2; GRM7; KIAA1217; TECTA;
POU5F1	2	373	2.5641	1.32833	0.44851	1	1	1	TTYH1; KIAA1217;
PRRX1	5	389	6.41026	3.17473	0.0209196	1	0.680482	1	TPD52L1; PARD3; GRM7; NTM; TECTA;
REST	4	765	5.12821	1.29213	0.376295	1	0.985974	1	GRIK2; PIP4K2A; SLC35F3; GRM7;
SOX1	1	276	1.28205	0.90204	0.676932	1	1	1	KIAA1217;
TGIF1	4	1034	5.12821	0.95598	0.610074	1	1	1	PIP4K2A; PMFBP1; GRM7; KIAA1217;
CRX	1	349	1.28205	0.713367	0.761049	1	1	1	AARS;
ESR2	1	464	1.28205	0.536566	0.851773	1	1	1	KIAA1217;
HENMT1	2	1144	2.5641	0.433107	0.950694	1	1	1	U2AF2; OPCML;
INSM1	2	487	2.5641	1.01739	0.591245	1	1	1	ZNF784; NTM;
NHLH1	2	1144	2.5641	0.433107	0.950694	1	1	1	U2AF2; OPCML;
NR1H4	1	62	1.28205	4.01503	0.223062	1	0.79734	1	BHLHE40;
ZEB1	1	401	1.28205	0.620862	0.807384	1	1	1	JAKMIP1;
ZFP161	7	1137	8.97436	1.51979	0.177421	1	0.79734	1	U2AF2; TPD52L1; UNC79; GLE1; KIF5B; BHLHE40; KIAA1217;
BACH2	4	628	5.12821	1.57401	0.250701	1	0.79734	1	CD109; MYO6; PRIMA1; KIAA1217;
EBF1	1	205	1.28205	1.21444	0.56728	1	1	1	GRM7;
MSX2	2	344	2.5641	1.4403	0.408049	1	0.994028	1	PARD3; NTM;
NOBOX	4	621	5.12821	1.59175	0.244509	1	0.79734	1	TPD52L1; PARD3; GRM7; KIAA1217;
TFAP4	5	1280	6.41026	0.964836	0.599844	1	1	1	TPD52L1; GRM7; JAKMIP1; NTM; TECTA;
ATF3	4	800	5.12821	1.2356	0.408697	1	0.994028	1	DUS2; LENG8; KIAA1217; DDX28;
TAL1	5	1113	6.41026	1.1096	0.473726	1	1	1	TPD52L1; KIAA1191; PMFBP1; KIAA1217; NTM;
HOXA9	4	729	5.12821	1.35594	0.342868	1	0.96003	1	MYO6; PPIC; GLG1; OPCML;
NFE2	2	518	2.5641	0.956505	0.625097	1	1	1	KLK4; GRM7;
LMO2	3	610	3.84615	1.21635	0.451769	1	1	1	TPD52L1; KIF5B; SLC17A5;
RUNX2	4	315	5.12821	3.13797	0.039189	1	0.680482	1	GRIK2; MYO6; ZFHX3; KIAA1217;
GATA1	3	728	3.84615	1.0192	0.570792	1	1	1	DUS2; IMPG1; DDX28;
FOXD3	4	361	5.12821	2.73813	0.0590967	1	0.680482	1	GRIK2; PARD3; KIAA1217; NTM;
ISL2	2	515	2.5641	0.962077	0.621916	1	1	1	GRM7; NTM;
ZNF143	5	618	6.41026	1.99835	0.106009	1	0.706522	1	ZNF274; GRIK2; PMFBP1; ZNF583; CFDP1;
CDX2	3	253	3.84615	2.93264	0.0835843	1	0.680482	1	TPD52L1; PIP4K2A; GRM7;
FOXK1	1	121	1.28205	2.05745	0.389415	1	0.985974	1	NTM;
FOXO1	1	192	1.28205	1.29666	0.54355	1	1	1	MYO6;
GFI1	1	552	1.28205	0.451028	0.897346	1	1	1	CD109;
HMX1	2	240	2.5641	2.06441	0.254389	1	0.79734	1	ZFHX3; GRM7;
HOXB9	1	537	1.28205	0.463626	0.890699	1	1	1	GRM7;
PAX4	2	175	2.5641	2.83115	0.158547	1	0.79734	1	MYO6; NTM;
PDX1	1	372	1.28205	0.669262	0.782763	1	1	1	NTM;
EOMES	1	291	1.28205	0.855545	0.696317	1	1	1	ZFHX3;
POU3F3	2	59	2.5641	8.39653	0.02394	1	0.680482	1	GRIK2; MYO6;
TBX5	1	204	1.28205	1.22039	0.565499	1	1	1	ZFHX3;
ATF6	1	195	1.28205	1.27671	0.549138	1	1	1	ZFHX3;
STRA13	2	574	2.5641	0.863189	0.680773	1	1	1	U2AF2; CFDP1;
ZIC1	1	548	1.28205	0.45432	0.895614	1	1	1	ZNF8;
DBX1	2	239	2.5641	2.07305	0.252886	1	0.79734	1	ZFHX3; NTM;
FOXJ2	1	299	1.28205	0.832655	0.706182	1	1	1	KIAA1217;
ELF1	5	585	6.41026	2.11108	0.0889721	1	0.680482	1	MYO6; DYRK3; BHLHE40; GRM7; STX12;
ITGAL	1	178	1.28205	1.39864	0.516557	1	1	1	ZFHX3;
ESX1	2	266	2.5641	1.86263	0.293498	1	0.865628	1	KIAA1217; NTM;
TLX2	1	60	1.28205	4.14884	0.216701	1	0.79734	1	GRIK2;
DLX5	1	220	1.28205	1.13164	0.59315	1	1	1	SNX24;
ATF4	3	315	3.84615	2.35544	0.13607	1	0.772287	1	ZFHX3; LENG8; KIAA1217;
SIX1	1	19	1.28205	13.0969	0.0743509	1	0.680482	1	ZFHX3;
RBPJ	1	235	1.28205	1.05941	0.617493	1	1	1	TTYH1;

## Sheet: Clinical phenotype
Analysis: Clinical phenotype
Dataset name: Western Pleasure
Number of genes in the dataset: 78
Number of genes in the dataset (which are available in Clinical phenotype database) :10
Number of genes in background: 19230
Is analysis quantitative: No
						Corrected p-values
Clinical phenotype	No. of genes in the dataset	No.of genes in the background dataset	Percentage of genes	Fold enrichment	P-value (Hypergeometric test)	Bonferroni method	BH method	Q-value (Storey-Tibshirani method)
Abdomen	4	621	5.12821	1.59175	0.244509	1	1	1	FAS; SLC17A5; SEMA3E; SC5D;
Absent 7-dehydrocholesterol	1	1	1.28205	246.507	0.00405616	1	1	1	SC5D;
Acanthocytes	1	3	1.28205	82.715	0.0121198	1	1	1	SC5D;
Affects mid- to high-frequencies	1	1	1.28205	246.507	0.00405616	1	1	1	TECTA;
Albinoid fundi	1	1	1.28205	246.507	0.00405616	1	1	1	SLC17A5;
Allelic disorder to autosomal recessive deafness 21 (DFNB21,	1	1	1.28205	246.507	0.00405616	1	1	1	TECTA;
Allelic to infantile sialic acid storage disorder (	1	1	1.28205	246.507	0.00405616	1	1	1	SLC17A5;
Allelic to Sialuria, Finnish type (	1	1	1.28205	246.507	0.00405616	1	1	1	SLC17A5;
Amniotic Fluid	1	68	1.28205	3.66082	0.241842	1	1	1	GLE1;
Anal atresia	1	10	1.28205	24.8723	0.0398384	1	1	1	SEMA3E;
Anal stenosis	1	11	1.28205	22.6133	0.043735	1	1	1	SEMA3E;
Anisopoikilocytosis	1	1	1.28205	246.507	0.00405616	1	1	1	SC5D;
Anophthalmia	1	5	1.28205	49.695	0.020119	1	1	1	SEMA3E;
Anosmia	1	9	1.28205	27.6329	0.0359261	1	1	1	SEMA3E;
Anteverted nares	1	36	1.28205	6.91397	0.136233	1	1	1	SC5D;
Anteverted nose	1	1	1.28205	246.507	0.00405616	1	1	1	SLC17A5;
Antinuclear antibody positive	1	3	1.28205	82.715	0.0121198	1	1	1	FAS;
Ascites	1	7	1.28205	35.5167	0.0280543	1	1	1	SLC17A5;
Ataxia	1	130	1.28205	1.91502	0.411488	1	1	1	SLC17A5;
Athetosis	1	6	1.28205	41.4263	0.0240946	1	1	1	SLC17A5;
Atrial septal defect	1	47	1.28205	5.29615	0.174079	1	1	1	SEMA3E;
Autistic features	1	25	1.28205	9.9549	0.0966759	1	1	1	SEMA3E;
Autoimmune hemolytic anemia	1	5	1.28205	49.695	0.020119	1	1	1	FAS;
Autoimmune neutropenia	1	3	1.28205	82.715	0.0121198	1	1	1	FAS;
Autoimmune thrombocytopenia	1	3	1.28205	82.715	0.0121198	1	1	1	FAS;
Autosomal dominant	5	747	6.41026	1.65326	0.186128	1	1	1	FAS; SEMA3E; OPCML; TECTA; SORL1;
Autosomal dominant form	1	37	1.28205	6.72716	0.139743	1	1	1	ZFHX3;
Autosomal recessive	4	924	5.12821	1.06979	0.51991	1	1	1	KLK4; GLE1; SLC17A5; SC5D;
Balance disturbances	1	2	1.28205	123.867	0.00809608	1	1	1	SEMA3E;
Behavioral Psychiatric Manifestations	1	200	1.28205	1.2448	0.558301	1	1	1	SEMA3E;
Bifid femur (some)	1	2	1.28205	123.867	0.00809608	1	1	1	SEMA3E;
Biliary Tract	1	30	1.28205	8.2963	0.114873	1	1	1	SC5D;
Bilobate gallbladder	1	1	1.28205	246.507	0.00405616	1	1	1	SC5D;
Bitemporal narrowing	1	8	1.28205	31.0827	0.0319981	1	1	1	SC5D;
Broad nasal bridge	1	34	1.28205	7.32055	0.12917	1	1	1	SC5D;
Calcaneal calcifications	1	1	1.28205	246.507	0.00405616	1	1	1	SLC17A5;
Cardiomegaly	1	21	1.28205	11.8502	0.0818524	1	1	1	SLC17A5;
Cardiovascular	2	446	2.5641	1.11091	0.543143	1	1	1	SLC17A5; SEMA3E;
Cataract	1	36	1.28205	6.91397	0.136233	1	1	1	SC5D;
Central Nervous System	5	887	6.41026	1.39232	0.291089	1	1	1	GLE1; SLC17A5; SEMA3E; SC5D; SORL1;
Cerebral atrophy	1	48	1.28205	5.18584	0.177438	1	1	1	SLC17A5;
CHARGE acronym (Coloboma, Heart defect, Atresia choanae, Retarded growth and development, Genital hypoplasia, Ear anomalies/deafness, Extremity abnormalities)	1	2	1.28205	123.867	0.00809608	1	1	1	SEMA3E;
CHARGE SYNDROME	1	2	1.28205	123.867	0.00809608	1	1	1	SEMA3E;
Chest	3	243	3.84615	3.05331	0.0761289	1	1	1	GLE1; SLC17A5; SEMA3E;
Chewing/swallowing difficulties	1	2	1.28205	123.867	0.00809608	1	1	1	SEMA3E;
Chronic noninfectious lymphadenopathy	1	3	1.28205	82.715	0.0121198	1	1	1	FAS;
Clear cornea	1	2	1.28205	123.867	0.00809608	1	1	1	SLC17A5;
Cleft lip	1	43	1.28205	5.7887	0.16051	1	1	1	SEMA3E;
Cleft palate	1	97	1.28205	2.56646	0.32648	1	1	1	SEMA3E;
Clubfeet	1	4	1.28205	62.0878	0.0161275	1	1	1	SC5D;
Coarse facial features	1	15	1.28205	16.5871	0.0591659	1	1	1	SLC17A5;
Colobomas (iris, choroid, retina, disc, and optic nerve)	1	2	1.28205	123.867	0.00809608	1	1	1	SEMA3E;
Conductive hearing loss	1	22	1.28205	11.3118	0.0855806	1	1	1	SC5D;
Conjugated hyperbilirubinemia	1	5	1.28205	49.695	0.020119	1	1	1	SLC17A5;
Cranial nerve anomalies	1	2	1.28205	123.867	0.00809608	1	1	1	SEMA3E;
Cryptorchidism	1	101	1.28205	2.46483	0.337397	1	1	1	SEMA3E;
Cup-shaped ears	1	5	1.28205	49.695	0.020119	1	1	1	SEMA3E;
Deafness (sensorineural or mixed sensorineural and conductive)	1	2	1.28205	123.867	0.00809608	1	1	1	SEMA3E;
Decreased 3-beta-hydroxysteroid-delta-5-desaturase (SC5D)	1	1	1.28205	246.507	0.00405616	1	1	1	SC5D;
Defective lymphocyte apoptosis	1	3	1.28205	82.715	0.0121198	1	1	1	FAS;
Delayed pubertal development	1	3	1.28205	82.715	0.0121198	1	1	1	SEMA3E;
Delivery	1	43	1.28205	5.7887	0.16051	1	1	1	SLC17A5;
Developmental delay	1	141	1.28205	1.76563	0.437398	1	1	1	SLC17A5;
Direct Coombs positive	1	3	1.28205	82.715	0.0121198	1	1	1	FAS;
Double-outlet right ventricle	1	2	1.28205	123.867	0.00809608	1	1	1	SEMA3E;
Downslanting palpebral fissures	1	57	1.28205	4.36716	0.207062	1	1	1	SEMA3E;
Duodenal atresia	1	4	1.28205	62.0878	0.0161275	1	1	1	SEMA3E;
Dysarthria	1	118	1.28205	2.10975	0.381877	1	1	1	SLC17A5;
Dysphagia	1	67	1.28205	3.71545	0.238743	1	1	1	SEMA3E;
Dyspraxia	1	1	1.28205	246.507	0.00405616	1	1	1	SLC17A5;
Early death (mean age 13 months)	1	1	1.28205	246.507	0.00405616	1	1	1	SLC17A5;
Early onset prostate cancer	1	12	1.28205	20.7304	0.047616	1	1	1	ZFHX3;
Ears	3	442	3.84615	1.67866	0.266669	1	1	1	SEMA3E; TECTA; SC5D;
Elevated alkaline phosphatase	1	4	1.28205	62.0878	0.0161275	1	1	1	SC5D;
Elevated ammonia	1	1	1.28205	246.507	0.00405616	1	1	1	SC5D;
Elevated gamma-glutamyltransferase	1	1	1.28205	246.507	0.00405616	1	1	1	SC5D;
Elevated lathosterol	1	1	1.28205	246.507	0.00405616	1	1	1	SC5D;
Elevated levels of vitamin B12	1	2	1.28205	123.867	0.00809608	1	1	1	FAS;
Elevated transaminases	1	6	1.28205	41.4263	0.0240946	1	1	1	SC5D;
Enamel and dentin contrast absent	1	1	1.28205	246.507	0.00405616	1	1	1	KLK4;
Enamel soft, primary and secondary dentitions	1	1	1.28205	246.507	0.00405616	1	1	1	KLK4;
Endocrine Features	1	155	1.28205	1.60617	0.468751	1	1	1	SEMA3E;
Enlarged lysosomal vacuoles in lymphocytes	1	1	1.28205	246.507	0.00405616	1	1	1	SLC17A5;
Eosinophilia	1	11	1.28205	22.6133	0.043735	1	1	1	FAS;
Epicanthal folds	2	61	2.5641	8.12128	0.0254726	1	1	1	SLC17A5; SC5D;
Esophageal atresia	1	8	1.28205	31.0827	0.0319981	1	1	1	SEMA3E;
Exotropia	1	6	1.28205	41.4263	0.0240946	1	1	1	SLC17A5;
External Features	1	180	1.28205	1.3831	0.520508	1	1	1	SEMA3E;
External Genitalia (Female)	1	50	1.28205	4.97845	0.184114	1	1	1	SEMA3E;
External Genitalia (Male)	1	151	1.28205	1.64871	0.459974	1	1	1	SEMA3E;
Eyes	3	826	3.84615	0.898277	0.656962	1	1	1	SLC17A5; SEMA3E; SC5D;
Face	4	433	5.12821	2.28284	0.0991704	1	1	1	GLE1; SLC17A5; SEMA3E; SC5D;
Facial asymmetry	1	15	1.28205	16.5871	0.0591659	1	1	1	SEMA3E;
Facial palsy	1	5	1.28205	49.695	0.020119	1	1	1	SEMA3E;
Failure to thrive	1	202	1.28205	1.23247	0.561914	1	1	1	SLC17A5;
Fair hair	1	1	1.28205	246.507	0.00405616	1	1	1	SLC17A5;
Feet	2	345	2.5641	1.43613	0.409468	1	1	1	SLC17A5; SC5D;
Fibroblasts show lamellar lysosomal inclusions on electron microscopy	1	1	1.28205	246.507	0.00405616	1	1	1	SC5D;
Frequent loss of heterozygosity at 6q24-q27	1	6	1.28205	41.4263	0.0240946	1	1	1	OPCML;
Gastrointestinal	1	425	1.28205	0.585803	0.825659	1	1	1	SEMA3E;
Generalized thinning of tubular bones	1	1	1.28205	246.507	0.00405616	1	1	1	GLE1;
Genetic heterogeneity	1	142	1.28205	1.7532	0.439697	1	1	1	SORL1;
Genitourinary	3	478	3.84615	1.55224	0.306504	1	1	1	SLC17A5; SEMA3E; SC5D;
Gonadotropin deficiency	1	2	1.28205	123.867	0.00809608	1	1	1	SEMA3E;
Growth	2	609	2.5641	0.813581	0.712082	1	1	1	SLC17A5; SEMA3E;
Growth hormone deficiency	1	11	1.28205	22.6133	0.043735	1	1	1	SEMA3E;
Growth retardation	1	57	1.28205	4.36716	0.207062	1	1	1	SLC17A5;
Gum hypertrophy	1	4	1.28205	62.0878	0.0161275	1	1	1	SLC17A5;
Hair	1	240	1.28205	1.03734	0.625283	1	1	1	SLC17A5;
Head	2	345	2.5641	1.43613	0.409468	1	1	1	SEMA3E; SC5D;
Head and Neck	5	954	6.41026	1.29454	0.344929	1	1	1	GLE1; SLC17A5; SEMA3E; TECTA; SC5D;
Hearing loss may be stable or progressive	1	1	1.28205	246.507	0.00405616	1	1	1	TECTA;
Hearing loss, sensorineural	1	38	1.28205	6.55017	0.143239	1	1	1	TECTA;
Heart	2	351	2.5641	1.41158	0.417947	1	1	1	SLC17A5; SEMA3E;
Heart failure	1	4	1.28205	62.0878	0.0161275	1	1	1	SLC17A5;
Height	1	290	1.28205	0.858495	0.695061	1	1	1	SLC17A5;
Height 2 S.D. below expected height	1	1	1.28205	246.507	0.00405616	1	1	1	SLC17A5;
Hematology	2	229	2.5641	2.16357	0.237869	1	1	1	FAS; SC5D;
Hepatomegaly	2	130	2.5641	3.81108	0.0977876	1	1	1	FAS; SLC17A5;
High-arched palate	2	86	2.5641	5.76071	0.0476949	1	1	1	SLC17A5; SC5D;
Highly variable phenotype, even within families	1	5	1.28205	49.695	0.020119	1	1	1	SEMA3E;
Horseshoe kidney	1	13	1.28205	19.137	0.0514814	1	1	1	SEMA3E;
Humoral defect (in some)	1	2	1.28205	123.867	0.00809608	1	1	1	SEMA3E;
Hydrocephalus	1	49	1.28205	5.08003	0.180782	1	1	1	SLC17A5;
Hydronephrosis	1	38	1.28205	6.55017	0.143239	1	1	1	SEMA3E;
Hydrops fetalis	1	5	1.28205	49.695	0.020119	1	1	1	SLC17A5;
Hyperbilirubinemia	1	6	1.28205	41.4263	0.0240946	1	1	1	SC5D;
Hypertelorism	1	121	1.28205	2.05745	0.389415	1	1	1	SEMA3E;
Hypocalcemia	1	13	1.28205	19.137	0.0514814	1	1	1	SEMA3E;
Hypopigmented skin	1	1	1.28205	246.507	0.00405616	1	1	1	SLC17A5;
Hypoplastic labia	1	3	1.28205	82.715	0.0121198	1	1	1	SEMA3E;
Hypoplastic semicircular canals	1	2	1.28205	123.867	0.00809608	1	1	1	SEMA3E;
Hypothyroidism	1	17	1.28205	14.6368	0.0667889	1	1	1	SEMA3E;
Hypotonia	2	233	2.5641	2.12643	0.243871	1	1	1	SLC17A5; SC5D;
Immunology	2	148	2.5641	3.34761	0.121218	1	1	1	FAS; SEMA3E;
Inability to walk	1	4	1.28205	62.0878	0.0161275	1	1	1	SLC17A5;
Incidence ranges from 1 in 8,500 to 1 in 12,000 births	1	2	1.28205	123.867	0.00809608	1	1	1	SEMA3E;
Increased fibroblast free sialic acid	1	1	1.28205	246.507	0.00405616	1	1	1	SLC17A5;
Increased frequency in Finland	1	2	1.28205	123.867	0.00809608	1	1	1	SLC17A5;
Increased interleukin 10	1	2	1.28205	123.867	0.00809608	1	1	1	FAS;
Increased levels of IgA	1	3	1.28205	82.715	0.0121198	1	1	1	FAS;
Increased levels of IgG	1	3	1.28205	82.715	0.0121198	1	1	1	FAS;
Increased levels of IgM	1	3	1.28205	82.715	0.0121198	1	1	1	FAS;
Increased number of CD4-/CD8- T cells expressing alpha/beta T-cell receptors	1	3	1.28205	82.715	0.0121198	1	1	1	FAS;
Increased number of peripheral CD3+ T cells	1	3	1.28205	82.715	0.0121198	1	1	1	FAS;
Increased proportion of HLA DR+ and CD57+ T cells	1	3	1.28205	82.715	0.0121198	1	1	1	FAS;
Increased risk of malignant lymphoma	1	2	1.28205	123.867	0.00809608	1	1	1	FAS;
Increased urinary free sialic acid excretion (N-acetylneuraminic acid, 5-20x normal) Enlarged lysosomal vacuoles in lymphocytes and fibroblasts	1	1	1.28205	246.507	0.00405616	1	1	1	SLC17A5;
Increased urinary free sialic acid (N-acetylneuraminic acid, 20-200x normal)	1	1	1.28205	246.507	0.00405616	1	1	1	SLC17A5;
Intellectual function may be high in milder cases	1	2	1.28205	123.867	0.00809608	1	1	1	SEMA3E;
Internal Genitalia (Male)	1	148	1.28205	1.68213	0.453296	1	1	1	SEMA3E;
Intrahepatic cholestasis	1	7	1.28205	35.5167	0.0280543	1	1	1	SC5D;
Iron deficiency anemia	1	5	1.28205	49.695	0.020119	1	1	1	FAS;
J-shaped sella	1	1	1.28205	246.507	0.00405616	1	1	1	SLC17A5;
Kidneys	3	276	3.84615	2.68826	0.10186	1	1	1	SLC17A5; SEMA3E; SC5D;
Lab	1	266	1.28205	0.93595	0.663335	1	1	1	OPCML;
Laboratory Abnormalities	4	712	5.12821	1.38831	0.327117	1	1	1	FAS; SLC17A5; SEMA3E; SC5D;
Large platelets	1	5	1.28205	49.695	0.020119	1	1	1	SC5D;
LATHOSTEROLOSIS	1	1	1.28205	246.507	0.00405616	1	1	1	SC5D;
Limbs	3	339	3.84615	2.18868	0.158847	1	1	1	GLE1; SLC17A5; SEMA3E;
Liver	3	256	3.84615	2.89827	0.0858805	1	1	1	FAS; SLC17A5; SC5D;
Long philtrum	1	54	1.28205	4.60974	0.197306	1	1	1	SC5D;
Long tract signs	1	13	1.28205	19.137	0.0514814	1	1	1	SORL1;
Lop ears	1	6	1.28205	41.4263	0.0240946	1	1	1	SEMA3E;
Lumbosacral meningocele	1	1	1.28205	246.507	0.00405616	1	1	1	SC5D;
Lung	1	171	1.28205	1.45589	0.502476	1	1	1	GLE1;
Lymph nodes show florid reactive follicular hyperplasia and marked paracortical expansion with immunoblasts and plasma cells	1	3	1.28205	82.715	0.0121198	1	1	1	FAS;
Lymphopenia	1	6	1.28205	41.4263	0.0240946	1	1	1	SEMA3E;
Malar flattening	1	2	1.28205	123.867	0.00809608	1	1	1	SEMA3E;
Many cases are sporadic, but somatic and germline mosaicism has been reported	1	2	1.28205	123.867	0.00809608	1	1	1	SEMA3E;
Marked fetal hydrops	1	1	1.28205	246.507	0.00405616	1	1	1	GLE1;
Mental retardation	2	200	2.5641	2.47727	0.194743	1	1	1	SLC17A5; SC5D;
Mental retardation, variable severity	1	2	1.28205	123.867	0.00809608	1	1	1	SEMA3E;
Metaphyseal irregularities	1	2	1.28205	123.867	0.00809608	1	1	1	SLC17A5;
Microcephaly	2	129	2.5641	3.84063	0.0965276	1	1	1	SEMA3E; SC5D;
Micrognathia	3	121	3.84615	6.13161	0.0131267	1	1	1	GLE1; SEMA3E; SC5D;
Micropenis	1	21	1.28205	11.8502	0.0818524	1	1	1	SEMA3E;
Microphthalmia	1	37	1.28205	6.72716	0.139743	1	1	1	SEMA3E;
Mild rib widening	1	1	1.28205	246.507	0.00405616	1	1	1	SLC17A5;
Miscellaneous	6	1228	7.69231	1.20643	0.380493	1	1	1	GLE1; FAS; SLC17A5; SEMA3E; TECTA; SORL1;
Mondini defect	1	2	1.28205	123.867	0.00809608	1	1	1	SEMA3E;
Monodactyly (some)	1	2	1.28205	123.867	0.00809608	1	1	1	SEMA3E;
Mouth	3	417	3.84615	1.7793	0.239426	1	1	1	SLC17A5; SEMA3E; SC5D;
Multiple congenital contractures	1	1	1.28205	246.507	0.00405616	1	1	1	GLE1;
Muscle atrophy	1	39	1.28205	6.38226	0.146721	1	1	1	GLE1;
Muscle hypoplasia	1	1	1.28205	246.507	0.00405616	1	1	1	GLE1;
Muscle, Soft Tissue	1	341	1.28205	0.730102	0.753005	1	1	1	GLE1;
Neonatal death	1	2	1.28205	123.867	0.00809608	1	1	1	GLE1;
Neoplasia	1	151	1.28205	1.64871	0.459974	1	1	1	FAS;
Nephrotic syndrome	1	16	1.28205	15.551	0.062985	1	1	1	SLC17A5;
Neurofibrillary tangles composed of disordered microtubules	1	11	1.28205	22.6133	0.043735	1	1	1	SORL1;
Neurologic	5	930	6.41026	1.32794	0.3255	1	1	1	GLE1; SLC17A5; SEMA3E; SC5D; SORL1;
Neutrophil antibody positive	1	3	1.28205	82.715	0.0121198	1	1	1	FAS;
Normal cholesterol	1	1	1.28205	246.507	0.00405616	1	1	1	SC5D;
Normal in neonatal period	1	1	1.28205	246.507	0.00405616	1	1	1	SLC17A5;
Nose	3	314	3.84615	2.36294	0.135147	1	1	1	SLC17A5; SEMA3E; SC5D;
Nystagmus	1	122	1.28205	2.04059	0.391907	1	1	1	SLC17A5;
Omphalocele	1	14	1.28205	17.771	0.0553313	1	1	1	SEMA3E;
Oncology	2	80	2.5641	6.19271	0.0418775	1	1	1	ZFHX3; OPCML;
Onset at 6-9 months	1	1	1.28205	246.507	0.00405616	1	1	1	SLC17A5;
Onset in early childhood	1	18	1.28205	13.8241	0.0705775	1	1	1	FAS;
Onset may be prelingual or in childhood	1	1	1.28205	246.507	0.00405616	1	1	1	TECTA;
Osteopenia	1	28	1.28205	8.88868	0.107638	1	1	1	SLC17A5;
Osteoporosis	1	42	1.28205	5.9265	0.157084	1	1	1	SC5D;
Other	2	384	2.5641	1.29028	0.46346	1	1	1	SLC17A5; SEMA3E;
OVARIAN CANCER	1	6	1.28205	41.4263	0.0240946	1	1	1	OPCML;
Ovarian cancer	1	7	1.28205	35.5167	0.0280543	1	1	1	OPCML;
Parathyroid hypoplasia	1	3	1.28205	82.715	0.0121198	1	1	1	SEMA3E;
Parkinsonism	1	42	1.28205	5.9265	0.157084	1	1	1	SORL1;
Patent ductus arteriosus	1	41	1.28205	6.07101	0.153644	1	1	1	SEMA3E;
Pathologic fracture	1	3	1.28205	82.715	0.0121198	1	1	1	SC5D;
Paucity of anterior horn motor neurons	1	1	1.28205	246.507	0.00405616	1	1	1	GLE1;
Peripheral Nervous System	1	178	1.28205	1.39864	0.516557	1	1	1	SEMA3E;
Phospholipid antibody positive	1	3	1.28205	82.715	0.0121198	1	1	1	FAS;
Platelet antibody positive	1	3	1.28205	82.715	0.0121198	1	1	1	FAS;
Poor feeding	1	70	1.28205	3.55624	0.248002	1	1	1	SEMA3E;
Postaxial hexadactyly	1	1	1.28205	246.507	0.00405616	1	1	1	SC5D;
Posterior choanal atresia (membranous and/or bony)	1	2	1.28205	123.867	0.00809608	1	1	1	SEMA3E;
Postnatal growth retardation	1	17	1.28205	14.6368	0.0667889	1	1	1	SEMA3E;
Premature birth	1	12	1.28205	20.7304	0.047616	1	1	1	SLC17A5;
Prenatal Manifestations	2	115	2.5641	4.30814	0.0794168	1	1	1	GLE1; SLC17A5;
Presenile and senile dementia	1	12	1.28205	20.7304	0.047616	1	1	1	SORL1;
Prominent upper lip	1	1	1.28205	246.507	0.00405616	1	1	1	SC5D;
PROSTATE CANCER	1	12	1.28205	20.7304	0.047616	1	1	1	ZFHX3;
Ptosis	3	107	3.84615	6.9338	0.00941921	1	1	1	SLC17A5; SEMA3E; SC5D;
Pulmonary hypoplasia	1	18	1.28205	13.8241	0.0705775	1	1	1	GLE1;
Pulmonary valve stenosis	1	4	1.28205	62.0878	0.0161275	1	1	1	SEMA3E;
Pyelectasis	1	1	1.28205	246.507	0.00405616	1	1	1	SC5D;
Radial aplasia (reported in 1 patient)	1	2	1.28205	123.867	0.00809608	1	1	1	SEMA3E;
Radiology	1	28	1.28205	8.88868	0.107638	1	1	1	KLK4;
Recessive inheritance has been reported	1	2	1.28205	123.867	0.00809608	1	1	1	FAS;
Reduced delayed hypersensitivity	1	3	1.28205	82.715	0.0121198	1	1	1	FAS;
Respiratory	1	360	1.28205	0.69157	0.771689	1	1	1	GLE1;
Rheumatoid factor positive	1	3	1.28205	82.715	0.0121198	1	1	1	FAS;
Rib anomalies	1	7	1.28205	35.5167	0.0280543	1	1	1	SEMA3E;
Ribs, Sternum, Clavicles and Scapulae	3	162	3.84615	4.57988	0.0281922	1	1	1	GLE1; SLC17A5; SEMA3E;
Sagittal vertebral cleft	1	1	1.28205	246.507	0.00405616	1	1	1	SC5D;
Schistocytes	1	5	1.28205	49.695	0.020119	1	1	1	SC5D;
Seizures	1	275	1.28205	0.90532	0.675597	1	1	1	SLC17A5;
Skeletal	4	634	5.12821	1.55911	0.256037	1	1	1	GLE1; SLC17A5; SEMA3E; SC5D;
Skin	2	539	2.5641	0.919239	0.646795	1	1	1	FAS; SLC17A5;
Skin, Nails, Hair	2	554	2.5641	0.89435	0.661689	1	1	1	FAS; SLC17A5;
Skull	1	148	1.28205	1.68213	0.453296	1	1	1	SLC17A5;
Sloping forehead	1	12	1.28205	20.7304	0.047616	1	1	1	SC5D;
Small ears	1	17	1.28205	14.6368	0.0667889	1	1	1	SEMA3E;
Smooth muscle antibody positive	1	3	1.28205	82.715	0.0121198	1	1	1	FAS;
Spasticity	1	103	1.28205	2.41697	0.342789	1	1	1	SLC17A5;
Speech delay	1	41	1.28205	6.07101	0.153644	1	1	1	SLC17A5;
Spine	1	286	1.28205	0.870501	0.689987	1	1	1	SC5D;
Spleen	2	109	2.5641	4.54526	0.0724113	1	1	1	FAS; SLC17A5;
Splenomegaly	2	84	2.5641	5.89786	0.0457242	1	1	1	FAS; SLC17A5;
Square face	1	3	1.28205	82.715	0.0121198	1	1	1	SEMA3E;
Susceptibility conferred by mutation in the alpha-2-macroglobulin gene (A2M,	1	11	1.28205	22.6133	0.043735	1	1	1	SORL1;
Syndactyly	1	47	1.28205	5.29615	0.174079	1	1	1	SC5D;
T cell defect, mild to severe	1	2	1.28205	123.867	0.00809608	1	1	1	SEMA3E;
Teeth	1	228	1.28205	1.09193	0.606317	1	1	1	KLK4;
Tetralogy of Fallot	1	21	1.28205	11.8502	0.0818524	1	1	1	SEMA3E;
Thick calvaria	1	2	1.28205	123.867	0.00809608	1	1	1	SLC17A5;
Thin fishbone-like ribs	1	1	1.28205	246.507	0.00405616	1	1	1	GLE1;
Thin lips	1	9	1.28205	27.6329	0.0359261	1	1	1	SC5D;
Thymic hypoplasia or aplasia	1	2	1.28205	123.867	0.00809608	1	1	1	SEMA3E;
Tibial aplasia (some)	1	2	1.28205	123.867	0.00809608	1	1	1	SEMA3E;
Tracheoesophageal fistula	1	5	1.28205	49.695	0.020119	1	1	1	SEMA3E;
Type II Arnold Chiari malformation	1	1	1.28205	246.507	0.00405616	1	1	1	SC5D;
Ulnar hypoplasia (some)	1	2	1.28205	123.867	0.00809608	1	1	1	SEMA3E;
Umbilical hernia	1	43	1.28205	5.7887	0.16051	1	1	1	SEMA3E;
Urticaria	1	4	1.28205	62.0878	0.0161275	1	1	1	FAS;
U-shaped audiogram	1	1	1.28205	246.507	0.00405616	1	1	1	TECTA;
Vacuolated monocytes	1	1	1.28205	246.507	0.00405616	1	1	1	SC5D;
Vasculitis rash	1	3	1.28205	82.715	0.0121198	1	1	1	FAS;
Ventricular septal defect	1	52	1.28205	4.787	0.190736	1	1	1	SEMA3E;

## Sheet: COSMIC
Analysis: COSMIC
Dataset name: Western Pleasure
Number of genes in the dataset: 78
Number of genes in the dataset (which are available in COSMIC database) :78
Number of genes in background: 19230
Is analysis quantitative: No
						Corrected p-values
COSMIC	No. of genes in the dataset	No.of genes in the background dataset	Percentage of genes	Fold enrichment	P-value (Hypergeometric test)	Bonferroni method	BH method	Q-value (Storey-Tibshirani method)
skin	59	11549	75.641	1.25953	0.00277715	0.11664	0.0579944	0.137271	FRMPD2; NOC3L; CCDC106; FCAR; U2AF2; ZNF530; ZNF544; ZNF8; RPS5; KLK4; MTO1; GRIK2; CD109; MYO6; NLRP5; KIAA1191; PPIC; SLC27A1; UNC79; ODF2; PIP4K2A; PARD3; AARS; HYDIN; VAC14; COG4; CDH5; ZFHX3; PMFBP1; DYRK3; SLC35F3; FAS; ZNF329; ZNF583; KLK12; SLC17A5; LENG8; IMPG1; TTYH1; SNX24; SIMC1; BHLHE40; GRM7; PRIMA1; KIAA1217; DDX28; SF3B3; CFDP1; GLG1; JAKMIP1; SEMA3E; NTM; OPCML; TBCEL; CLNS1A; TE…
prostate	39	9587	50	1.00305	0.534857	1	0.944016	1	FRMPD2; EPS8L1; ZNF274; TPD52L1; ZNF8; KLK4; MTO1; GRIK2; CD109; MYO6; NLRP5; UNC79; KIF5B; PARD3; AARS; HYDIN; VAC14; COG4; CDH5; ZFHX3; PMFBP1; ZNF583; LENG8; IMPG1; TTYH1; GRM7; KIAA1217; DDX28; SF3B3; GLG1; DDX19B; JAKMIP1; SEMA3E; NTM; TBCEL; TECTA; GRIK4; UBASH3B; SORL1;
biliary tract	6	1799	7.69231	0.823512	0.749313	1	1	1	CD109; KIF5B; HYDIN; GRM7; JAKMIP1; TECTA;
CancerGeneCensus geneList	2	503	2.5641	0.985028	0.608989	1	0.983751	1	KIF5B; FAS;
lung	69	15353	88.4615	1.10802	0.0331777	1	0.129238	0.305903	FRMPD2; NOC3L; EPS8L1; ZNF581; ZNF274; FCAR; U2AF2; TPD52L1; ZNF667; ZNF530; ZNF544; ZNF8; RPS5; KLK4; GRIK2; CD109; MYO6; NLRP5; KIAA1191; PPIC; PGLS; SLC27A1; UNC79; GLE1; ODF2; KIF5B; PIP4K2A; PARD3; AARS; HYDIN; VAC14; COG4; CDH5; ZFHX3; DUS2; PMFBP1; DYRK3; SLC35F3; FAS; ZNF784; ZNF329; KLK11; ZNF583; HDDC2; KLK12; SLC17A5; IMPG1; TTYH1; SNX24; BHLHE40; GRM7; STX12; DEPDC4; KIAA1217; CCNY; D…
autonomic ganglia	6	736	7.69231	2.01289	0.0780993	1	0.227651	0.538841	FRMPD2; ZNF8; KLK4; ODF2; PMFBP1; HDDC2;
meninges	2	447	2.5641	1.10843	0.544361	1	0.944016	1	GRM7; OPCML;
kidney	61	13456	78.2051	1.11767	0.0683603	1	0.220856	0.522759	FRMPD2; EPS8L1; CCDC106; ZNF274; FCAR; TPD52L1; ZNF667; ZNF530; ZNF544; ZNF8; KLK4; MTO1; GRIK2; CD109; MYO6; NLRP5; KIAA1191; PPIC; SLC27A1; UNC79; GLE1; ODF2; KIF5B; PIP4K2A; PARD3; AARS; HYDIN; VAC14; COG4; CDH5; ZFHX3; DUS2; PMFBP1; DYRK3; SLC35F3; ZNF329; ZNF583; KLK12; SLC17A5; LENG8; IMPG1; TTYH1; SNX24; SIMC1; BHLHE40; GRM7; DEPDC4; KIAA1217; CCNY; SF3B3; CFDP1; GLG1; DDX19B; JAKMIP1; SEM…
endometrium	60	12807	76.9231	1.15506	0.0317924	1	0.129238	0.305903	NOC3L; EPS8L1; CCDC106; ZNF274; FCAR; TPD52L1; ZNF667; ZNF530; ZNF544; ZNF8; MTO1; GRIK2; CD109; MYO6; NLRP5; KIAA1191; PPIC; PGLS; SLC27A1; UNC79; GLE1; ODF2; KIF5B; PIP4K2A; PARD3; AARS; HYDIN; VAC14; CDH5; ZFHX3; DUS2; PMFBP1; DYRK3; SLC35F3; KLK11; ZNF583; HDDC2; KLK12; SLC17A5; LENG8; IMPG1; TTYH1; BHLHE40; GRM7; PRIMA1; DEPDC4; DDX19A; SF3B3; CFDP1; GLG1; DDX19B; JAKMIP1; SEMA3E; NTM; OPCML…
stomach	12	1289	15.3846	2.29676	0.00554046	0.232699	0.0581748	0.137698	EPS8L1; CD109; NLRP5; GLE1; HYDIN; PMFBP1; DYRK3; SLC17A5; KIAA1217; SEMA3E; TECTA; GRIK4;
large intestine	77	17427	98.7179	1.08931	0.00414246	0.173983	0.0579944	0.137271	FRMPD2; NOC3L; EPS8L1; ZNF581; CCDC106; ZNF274; FCAR; U2AF2; TPD52L1; ZNF667; ZNF530; ZNF544; ZNF8; RPS5; KLK4; NAT14; MTO1; GRIK2; CD109; MYO6; NLRP5; PPIC; PGLS; SLC27A1; UNC79; GLE1; ODF2; KIF5B; PIP4K2A; PARD3; AARS; HYDIN; VAC14; COG4; CDH5; ZFHX3; DUS2; PMFBP1; DYRK3; SLC35F3; FAS; ZNF784; ZNF329; KLK11; ZNF583; HDDC2; KLK12; SLC17A5; LENG8; IMPG1; TTYH1; SNX24; SIMC1; BHLHE40; GRM7; STX12;…
parathyroid	1	202	1.28205	1.23247	0.561914	1	0.944016	1	SF3B3;
central nervous system	56	12014	71.7949	1.14923	0.054297	1	0.19004	0.449817	NOC3L; EPS8L1; ZNF581; ZNF274; U2AF2; TPD52L1; ZNF667; ZNF544; ZNF8; RPS5; NAT14; GRIK2; CD109; MYO6; NLRP5; PPIC; PGLS; SLC27A1; UNC79; GLE1; ODF2; KIF5B; PARD3; AARS; HYDIN; COG4; CDH5; ZFHX3; PMFBP1; DYRK3; SLC35F3; ZNF329; KLK11; ZNF583; SLC17A5; LENG8; IMPG1; TTYH1; SNX24; BHLHE40; GRM7; STX12; PRIMA1; KIAA1217; CCNY; DDX28; SF3B3; GLG1; JAKMIP1; SEMA3E; NTM; OPCML; TECTA; GRIK4; UBASH3B; SO…
eye	3	461	3.84615	1.60948	0.28763	1	0.685484	1	ZNF544; CD109; COG4;
ovary	57	12007	73.0769	1.17043	0.0317355	1	0.129238	0.305903	FRMPD2; NOC3L; EPS8L1; ZNF581; ZNF274; FCAR; U2AF2; ZNF544; ZNF8; NAT14; MTO1; GRIK2; CD109; MYO6; NLRP5; KIAA1191; PPIC; UNC79; GLE1; ODF2; KIF5B; PIP4K2A; PARD3; AARS; HYDIN; VAC14; CDH5; ZFHX3; DUS2; PMFBP1; DYRK3; SLC35F3; ZNF329; ZNF583; KLK12; SLC17A5; LENG8; IMPG1; TTYH1; BHLHE40; GRM7; KIAA1217; DDX28; DDX19A; SF3B3; GLG1; JAKMIP1; SEMA3E; NTM; OPCML; TBCEL; CLNS1A; TECTA; GRIK4; SC5D; UB…
bone	7	1330	8.97436	1.29925	0.293779	1	0.685484	1	FRMPD2; MTO1; UNC79; HYDIN; ZFHX3; SEMA3E; GRIK4;
240 NB cases mutantgeneList	18	3941	23.0769	1.12651	0.327126	1	0.72312	1	FRMPD2; ZNF274; FCAR; GRIK2; NLRP5; UNC79; PARD3; HYDIN; CDH5; ZFHX3; PMFBP1; SLC35F3; HDDC2; LENG8; KIAA1217; JAKMIP1; TECTA; SORL1;
haematopoietic and lymphoid tissue	47	8977	60.2564	1.29089	0.0108987	0.457746	0.0915493	0.216694	FRMPD2; EPS8L1; ZNF581; FCAR; U2AF2; ZNF667; ZNF530; ZNF544; ZNF8; GRIK2; CD109; MYO6; NLRP5; SLC27A1; UNC79; GLE1; KIF5B; PIP4K2A; PARD3; HYDIN; VAC14; COG4; CDH5; ZFHX3; PMFBP1; FAS; ZNF583; HDDC2; IMPG1; TTYH1; SNX24; BHLHE40; GRM7; KIAA1217; CCNY; DDX28; DDX19A; SF3B3; GLG1; JAKMIP1; SEMA3E; NTM; OPCML; TECTA; GRIK4; UBASH3B; SORL1;
breast	64	14924	82.0513	1.05728	0.212339	1	0.55739	1	FRMPD2; NOC3L; EPS8L1; ZNF274; FCAR; ZNF667; ZNF530; ZNF544; ZNF8; RPS5; KLK4; MTO1; GRIK2; CD109; MYO6; NLRP5; KIAA1191; PGLS; SLC27A1; UNC79; GLE1; ODF2; KIF5B; PIP4K2A; PARD3; AARS; HYDIN; VAC14; COG4; CDH5; ZFHX3; DUS2; PMFBP1; DYRK3; SLC35F3; FAS; ZNF329; KLK11; ZNF583; HDDC2; KLK12; SLC17A5; LENG8; IMPG1; SIMC1; BHLHE40; GRM7; STX12; DEPDC4; KIAA1217; CCNY; DDX19A; SF3B3; CFDP1; GLG1; JAKMI…
upper aerodigestive tract	34	6364	43.5897	1.31736	0.0338482	1	0.129238	0.305903	NOC3L; ZNF274; ZNF667; ZNF530; ZNF544; KLK4; GRIK2; CD109; MYO6; NLRP5; KIAA1191; SLC27A1; UNC79; GLE1; ODF2; PIP4K2A; PARD3; HYDIN; COG4; PMFBP1; SLC35F3; FAS; ZNF784; LENG8; IMPG1; KIAA1217; DDX19A; CFDP1; GLG1; DDX19B; JAKMIP1; SEMA3E; TECTA; SORL1;
cervix	18	2590	23.0769	1.71412	0.0142428	0.598196	0.0996993	0.235985	FRMPD2; U2AF2; ZNF8; RPS5; NLRP5; UNC79; ODF2; AARS; HYDIN; ZFHX3; DUS2; IMPG1; BHLHE40; CCNY; GLG1; TECTA; GRIK4; SORL1;
thyroid	32	8760	41.0256	0.900763	0.820655	1	1	1	FRMPD2; EPS8L1; FCAR; U2AF2; KLK4; NAT14; PGLS; GLE1; ODF2; AARS; HYDIN; VAC14; COG4; CDH5; ZFHX3; DUS2; PMFBP1; SLC35F3; ZNF784; KLK12; LENG8; SIMC1; BHLHE40; KIAA1217; DDX28; SF3B3; GLG1; SEMA3E; TBCEL; CLNS1A; TECTA; SORL1;
liver	65	14176	83.3333	1.13046	0.0313294	1	0.129238	0.305903	FRMPD2; NOC3L; EPS8L1; ZNF581; CCDC106; ZNF274; FCAR; ZNF667; ZNF530; ZNF544; ZNF8; KLK4; MTO1; GRIK2; CD109; MYO6; NLRP5; KIAA1191; PPIC; PGLS; SLC27A1; UNC79; GLE1; ODF2; KIF5B; PIP4K2A; PARD3; AARS; HYDIN; VAC14; COG4; CDH5; ZFHX3; DUS2; PMFBP1; DYRK3; SLC35F3; FAS; ZNF784; ZNF329; ZNF583; HDDC2; KLK12; LENG8; IMPG1; TTYH1; SNX24; BHLHE40; GRM7; STX12; KIAA1217; CCNY; DDX28; SF3B3; CFDP1; GLG1…
pancreas	64	12286	82.0513	1.2843	0.000355701	0.0149394	0.0149394	0.0353611	FRMPD2; NOC3L; EPS8L1; ZNF581; ZNF274; FCAR; U2AF2; ZNF667; ZNF530; ZNF544; ZNF8; KLK4; NAT14; MTO1; GRIK2; CD109; MYO6; NLRP5; PPIC; PGLS; SLC27A1; UNC79; GLE1; ODF2; PIP4K2A; PARD3; AARS; HYDIN; VAC14; COG4; CDH5; ZFHX3; PMFBP1; DYRK3; SLC35F3; ZNF784; ZNF329; KLK11; ZNF583; HDDC2; SLC17A5; LENG8; IMPG1; TTYH1; SIMC1; BHLHE40; GRM7; STX12; PRIMA1; KIAA1217; CCNY; DDX19A; SF3B3; GLG1; DDX19B; JA…
neuroblastoma	6	744	7.69231	1.99125	0.0813038	1	0.227651	0.538841	FRMPD2; ZNF8; KLK4; ODF2; PMFBP1; HDDC2;
oesophagus	25	5660	32.0513	1.08925	0.3453	1	0.72513	1	CCDC106; ZNF274; FCAR; ZNF667; GRIK2; NLRP5; UNC79; PARD3; HYDIN; VAC14; COG4; ZFHX3; PMFBP1; IMPG1; TTYH1; GRM7; DEPDC4; DDX28; SF3B3; JAKMIP1; SEMA3E; NTM; OPCML; TECTA; SORL1;
urinary tract	54	13085	69.2308	1.01749	0.464602	1	0.886968	1	FRMPD2; CCDC106; U2AF2; TPD52L1; ZNF530; ZNF544; GRIK2; CD109; MYO6; NLRP5; KIAA1191; PPIC; SLC27A1; UNC79; ODF2; KIF5B; PARD3; AARS; HYDIN; VAC14; COG4; CDH5; ZFHX3; PMFBP1; DYRK3; SLC35F3; ZNF784; ZNF329; KLK11; ZNF583; HDDC2; KLK12; SLC17A5; IMPG1; TTYH1; SIMC1; BHLHE40; GRM7; DEPDC4; KIAA1217; CCNY; DDX19A; SF3B3; GLG1; DDX19B; JAKMIP1; SEMA3E; NTM; OPCML; TBCEL; TECTA; GRIK4; UBASH3B; SORL1;
salivary gland	3	555	3.84615	1.33689	0.392066	1	0.784132	1	UNC79; ZFHX3; DUS2;
